# Supplementary material for: Sex specific effects of adoptive Tregs transfer on the brain and periphery in maternal immune activation offspring rescuing immune dysregulation
Source: J Neuroinflammation. 2026 Mar 12;23:133. doi: 10.1186/s12974-026-03739-w (PMC13097898; doi:10.1186/s12974-026-03739-w)
Supplement: Supplementary file 1 — Supplementary Material 1. [file 12974_2026_3739_MOESM1_ESM.xlsx]

## Sheet: WGCNA Data
ensembl_gene_id	geneSymbol	description	genelength	moduleColor	GS.Dam.Treatment	p.GS.Dam.Treatment	GS.Pup.Treatment	p.GS.Pup.Treatment	GS.Brain.Region	p.GS.Brain.Region	MM.yellow	p.MM.yellow	MM.green	p.MM.green	MM.brown	p.MM.brown	MM.grey	p.MM.grey	MM.blue	p.MM.blue	MM.turquoise	p.MM.turquoise	PA3C1	PA3FC1	PA3H1	PA7C2	PA7FC2	PA7H2	PA8C3	PA8H3	PA8FC3	PA13C4	PA13FC4	PA13H4	PA17C5	PA17FC5	PA17H5	PA18C6	PA18FC6	PA18H6	PA23C7	PA23FC7	PA23H7	PA25C8	PA25FC8	PA25H8	PA28C9	PA28FC9	PA28H9
ENSMUSG00000098104	Gm6085	predicted gene 6085 [Source:MGI Symbol;Acc:MGI:3646770]	1469	blue	0.044755	0.554183	0.0314129	0.678096	-0.310239	2.64119e-05	0.352888	1.45363e-06	0.062921	0.405407	0.129416	0.0860154	0.122915	0.103127	0.507411	5.69293e-13	-0.497875	1.78095e-12	0.71406	0	0.453475	1.02229	0	0.47119	0.595987	0.431009	0	2.22539	0	0.439684	1.1447	0	0	0.650578	0	0.478018	1.13234	0	0	0	0.759397	1.26741	2.13677	0	0.85756
ENSMUSG00000102653	Gm37079	predicted gene, 37079 [Source:MGI Symbol;Acc:MGI:5610307]	2134	blue	-0.00470663	0.950424	0.05992	0.428216	-0.429704	2.3945e-09	0.393774	5.88066e-08	0.0378958	0.616527	0.218187	0.003529	0.114354	0.129626	0.585973	1.05495e-17	-0.617656	5.33884e-20	0.526918	0	0.326816	0.773837	0	0.34015	0	0	0	1.59674	0	0.316463	1.41536	0.565181	0	0.477404	0	0	1.40124	0	0	0.785591	0.562569	0.569857	1.56029	0	0
ENSMUSG00000093178	Snord87	small nucleolar RNA, C/D box 87 [Source:MGI Symbol;Acc:MGI:2387894]	86	blue	0.00422431	0.955499	-0.0749514	0.321445	-0.19774	0.0083343	0.117769	0.118489	-0.0415492	0.582939	0.118473	0.116288	0.0549263	0.467766	0.342545	3.0571e-06	-0.317498	1.66188e-05	6.05821	4.23284	4.71342	6.15892	5.45128	2.92557	6.46552	4.23588	4.91682	5.27346	6.69265	3.71945	6.84261	5.91888	5.4353	5.31946	4.21734	4.7991	5.9563	4.3316	4.37457	6.18668	6.16997	4.95644	6.87131	5.80026	4.84495
ENSMUSG00000102556	Gm37569	predicted gene, 37569 [Source:MGI Symbol;Acc:MGI:5610797]	1721	blue	-0.0843289	0.264438	0.0184194	0.807743	-0.27567	0.000204183	0.39756	4.27121e-08	0.116759	0.121703	0.270167	0.000276122	-0.0278814	0.712589	0.527582	4.5218e-14	-0.542848	5.92945e-15	1.4005	0	0	0.910848	0	0.411096	1.20778	0	0	1.81165	0	0	1.35079	0	0	0	0	0.417173	0.593393	0	0	0	0	0.378853	1.29285	0	0
ENSMUSG00000103085	Gm38120	predicted gene, 38120 [Source:MGI Symbol;Acc:MGI:5611348]	4641	blue	0.0354535	0.639439	0.0431462	0.568527	-0.338702	4.00264e-06	0.519119	1.33569e-13	0.215061	0.00404489	0.134812	0.0736109	0.0614522	0.416479	0.44983	3.35965e-10	-0.497301	1.9054e-12	0.856653	0	0.664046	0.218088	0	0.166406	0.979244	0.287371	0.239285	0.55136	0.276101	0.154169	0.820999	0	0	0.239222	0	0.320405	0	0.235465	0.166009	0.584212	0.286034	0.531516	0.442008	0	0.174413
ENSMUSG00000102664	Gm38380	predicted gene, 38380 [Source:MGI Symbol;Acc:MGI:5611608]	2247	blue	-8.59056e-05	0.999095	0.128623	0.0879733	-0.477981	1.72198e-11	0.399622	3.58259e-08	0.0223424	0.767859	0.244893	0.00101921	0.155387	0.0389034	0.573005	7.80915e-17	-0.602601	7.08172e-19	1.17379	0.749621	0	1.23157	0	0	1.22503	0.295869	0	0.566271	0.521687	0.302102	0	0.541471	0.548173	0.803245	0	0	0.831372	0	0.324096	1.02226	0	0.298669	1.31085	0	0.339613
ENSMUSG00000025935	Tram1	translocating chain-associating membrane protein 1 [Source:MGI Symbol;Acc:MGI:1919515]	25212	blue	-0.0110804	0.883625	0.0115531	0.878698	-0.197001	0.00858455	0.252135	0.000710403	-0.000425533	0.995515	0.308723	2.90513e-05	-0.168745	0.0247538	0.469033	4.55991e-11	-0.462229	9.38565e-11	1.55599	1.34964	1.27518	1.37413	1.13953	1.13276	1.17104	1.4778	1.21932	1.44024	1.06151	1.28243	1.35181	1.20097	1.3822	1.3933	1.15757	1.14606	1.41526	1.0084	1.1455	1.52032	1.19642	1.30798	1.40587	1.17634	1.07847
ENSMUSG00000025927	Tfap2b	transcription factor AP-2 beta [Source:MGI Symbol;Acc:MGI:104672]	29662	blue	0.0345645	0.647866	-0.00731019	0.923069	-0.861638	1.98752e-53	0.298528	5.43863e-05	-0.310761	2.55569e-05	0.514315	2.43759e-13	0.289482	9.30514e-05	0.963008	1.36747e-101	-0.931861	5.68743e-79	2.02732	0.0367598	0.0261501	1.84976	0.0440276	0	2.04119	0.0727643	0.225722	2.05936	0.0922095	0.0252358	2.14357	0.142096	0.02504	2.133	0.205513	0	2.07646	0.0778955	0.319675	1.90066	0.141341	0.024921	2.17175	0.212465	0.0287195
ENSMUSG00000025931	Paqr8	progestin and adipoQ receptor family member VIII [Source:MGI Symbol;Acc:MGI:1921479]	49044	blue	0.00495752	0.947785	-0.0609832	0.420052	-0.704159	8.02369e-28	0.318314	1.57645e-05	-0.239677	0.00131327	0.558046	7.06537e-16	0.106549	0.158089	0.942052	6.22006e-85	-0.92404	5.41376e-75	2.42071	1.3741	1.65358	2.39566	1.22074	1.5576	2.48842	1.71083	1.45488	2.3803	1.54402	1.69653	2.42516	1.33531	1.66481	2.40623	1.34666	1.54493	2.48705	1.33723	1.78513	2.28036	1.61085	1.67918	2.36617	1.46012	1.76882
ENSMUSG00000102633	Gm38224	predicted gene, 38224 [Source:MGI Symbol;Acc:MGI:5611452]	2099	blue	0.0953115	0.206975	0.118748	0.115435	-0.311743	2.40181e-05	0.421171	5.30041e-09	0.16915	0.0244048	0.0286627	0.704904	0.136957	0.0691017	0.403644	2.5335e-08	-0.421589	5.10072e-09	0	0	0.331684	0.78379	0	0.345194	0	0.314608	0.484284	0.598923	0.552229	0	0.885597	0	0	0	0	0	0.503008	0	0.344419	0.451998	0	0	1.5761	0	0
ENSMUSG00000100775	Gm29107	predicted gene 29107 [Source:MGI Symbol;Acc:MGI:5579813]	346	blue	0.132291	0.0792134	0.0650936	0.389353	-0.345259	2.52174e-06	0.352127	1.53675e-06	0.0437762	0.562889	0.336565	4.64278e-06	-0.0722071	0.33953	0.507491	5.63778e-13	-0.532869	2.26352e-14	3.8674	0	0	1.67307	0	1.40048	2.90978	0	0	3.37367	0	1.32927	3.12305	1.98471	1.32246	1.77365	0	0	4.01653	0	0	1.69245	0	0	0	2.13769	0
ENSMUSG00000042182	Bend6	BEN domain containing 6 [Source:MGI Symbol;Acc:MGI:2444572]	55764	blue	-0.0493946	0.513824	-0.0206429	0.785069	-0.868008	4.30579e-55	-0.122397	0.1046	-0.621546	2.67574e-20	0.542701	6.04973e-15	0.398761	3.85582e-08	0.728289	1.55288e-30	-0.702486	1.20898e-27	2.43831	2.30845	2.0058	2.70658	2.23027	1.91366	2.67579	1.94923	2.35021	2.17799	2.23921	2.20004	2.5482	2.18334	2.078	2.52939	2.40297	2.31434	2.46527	2.41228	2.45042	2.63075	2.1297	1.89358	2.49556	2.0436	1.95492
ENSMUSG00000104416	Gm37067	predicted gene, 37067 [Source:MGI Symbol;Acc:MGI:5610295]	1627	blue	0.0714435	0.344675	0.0861756	0.254082	-0.359238	9.08894e-07	0.372814	3.21695e-07	0.104384	0.166763	-0.00712237	0.92504	0.234366	0.00169068	0.370383	3.88823e-07	-0.365794	5.53682e-07	0	0	0.415183	0.551393	0	0	0.547778	0	0	0	0	0	0.629194	0	0	0	0	0	0.62123	0	0	0.560395	0.700889	0	0.59579	1.66426	0
ENSMUSG00000103596	Gm37354	predicted gene, 37354 [Source:MGI Symbol;Acc:MGI:5610582]	2383	blue	0.137097	0.0688148	0.126764	0.0926987	-0.489682	4.61512e-12	0.524622	6.62671e-14	0.12328	0.102101	0.162583	0.0306101	0.174111	0.0204649	0.58629	1.00342e-17	-0.586803	9.25318e-18	1.57236	0	0	0.709858	0	0	2.15979	0.280521	0	1.23865	0.496484	0.286462	1.08392	0	0.284427	0.434296	0	0.31285	0	0	0.307434	0.979845	0	0	0.431988	0.578933	0
ENSMUSG00000103364	Gm38157	predicted gene, 38157 [Source:MGI Symbol;Acc:MGI:5611385]	1697	blue	0.120761	0.109356	0.0716465	0.343303	-0.390188	7.93191e-08	0.434064	1.58167e-09	0.116044	0.124019	0.0572265	0.449304	0.244509	0.0010386	0.463595	8.12936e-11	-0.461902	9.71248e-11	0	0	0	0.532365	0.624468	0	1.47047	0	0	0.7106	0	0	0	0	0	0	0	0	0	0	0.415233	0.541112	0.677805	0.383558	0.575515	0.759869	0
ENSMUSG00000026127	Imp4	IMP4, U3 small nucleolar ribonucleoprotein [Source:MGI Symbol;Acc:MGI:106572]	9505	blue	-0.0536433	0.478243	0.0238654	0.752531	-0.183421	0.014536	0.16567	0.0275432	-0.109262	0.14771	0.37941	1.90866e-07	-0.142467	0.0585397	0.48751	5.91528e-12	-0.456172	1.76101e-10	1.57508	1.51214	1.61113	1.89109	1.4027	1.28255	1.41149	1.70489	1.04058	1.5518	0.599244	1.5222	1.65643	1.0543	1.74389	1.37023	1.28291	1.72554	1.35957	1.35509	1.80772	1.59993	1.32134	1.48252	1.6325	1.3135	1.55832
ENSMUSG00000026123	Plekhb2	pleckstrin homology domain containing, family B (evectins) member 2 [Source:MGI Symbol;Acc:MGI:2385825]	29604	blue	-0.101661	0.178169	-0.0978443	0.195106	-0.680159	2.2096e-25	-0.150865	0.0450278	-0.625978	1.20371e-20	0.661351	1.25825e-23	0.125213	0.096795	0.787688	1.16886e-38	-0.745462	1.19124e-32	2.81515	2.66735	2.39785	2.89666	2.5772	2.24994	2.78421	2.42985	2.48801	2.84118	2.48442	2.48007	2.95052	2.34462	2.52894	2.80615	2.67104	2.52023	2.82641	2.36209	2.44239	2.74699	2.60592	2.37086	3.08794	2.20687	2.28928
ENSMUSG00000001138	Cnnm3	cyclin M3 [Source:MGI Symbol;Acc:MGI:2151055]	16370	blue	0.0935855	0.215355	-0.0374358	0.620815	-0.295178	6.64913e-05	0.347812	2.10063e-06	0.00758417	0.920196	0.194508	0.00947963	0.024621	0.744961	0.570342	1.1653e-16	-0.509998	4.15194e-13	1.10392	0.917228	1.06607	1.36347	1.19625	1.07667	1.67954	1.02224	0.902649	1.44123	0.504443	1.4471	1.45352	1.58523	0.941099	0.94139	1.227	1.01599	1.28938	0.76864	1.07475	1.4571	1.2051	1.11647	1.67137	0.897239	1.23142
ENSMUSG00000079610	Ankrd39	ankyrin repeat domain 39 [Source:MGI Symbol;Acc:MGI:1914816]	9938	blue	-0.0145876	0.847186	-0.0185582	0.806323	-0.708021	3.0813e-28	0.182586	0.0149982	-0.315238	1.9222e-05	0.430775	2.16382e-09	0.291979	8.03734e-05	0.799284	1.48908e-40	-0.77121	3.67521e-36	1.21741	0.622173	0.628481	1.09973	0.799022	0.800934	1.41327	0.78285	0.668797	1.50977	1.12563	0.962012	1.38463	0.694102	0.917126	1.51246	0.686401	0.762815	1.55503	0.659506	0.650309	1.2148	0.495305	0.789167	1.84596	0.67081	0.831997
ENSMUSG00000026121	Sema4c	sema domain, immunoglobulin domain (Ig), transmembrane domain (TM) and short cytoplasmic domain, (semaphorin) 4C [Source:MGI Symbol;Acc:MGI:109252]	9710	blue	0.0372945	0.622134	-0.0287975	0.703582	-0.62837	7.78061e-21	-0.0495878	0.512177	-0.500579	1.29356e-12	0.678071	3.51222e-25	0.0207435	0.784048	0.722747	6.91207e-30	-0.715097	5.12125e-29	1.45626	1.40901	1.29441	1.44147	1.43505	1.19256	1.89082	1.42524	1.49097	1.29047	0.682449	1.26395	1.75776	0.706981	1.35107	1.80731	1.67016	1.50707	1.57721	0.746644	1.48899	1.72532	0.878509	1.34686	1.96823	0.977746	1.59783
ENSMUSG00000102930	Gm38115	predicted gene, 38115 [Source:MGI Symbol;Acc:MGI:5611343]	2938	blue	0.0245342	0.74583	0.140759	0.0616614	-0.307029	3.2293e-05	0.475537	2.25296e-11	0.159522	0.0339331	0.246009	0.000964724	-0.025136	0.739817	0.501987	1.09383e-12	-0.534532	1.81602e-14	0.400764	0	0.244482	0	0	0	0	0	0	0.451684	0.414866	0	0.381561	0	0.234819	0	0	0	0.921518	0	0	0.336699	0	0	0.647355	0	0.266628
ENSMUSG00000026078	Pdcl3	phosducin-like 3 [Source:MGI Symbol;Acc:MGI:1916083]	11630	blue	-0.108249	0.151524	0.0333425	0.659522	-0.549975	2.21596e-15	-0.0504838	0.504574	-0.40722	1.85466e-08	0.747425	6.65785e-33	-0.0383301	0.61249	0.632551	3.5952e-21	-0.682791	1.22483e-25	1.74238	0.83984	0.84243	1.53034	0.396309	0.52516	1.49008	0.910404	0.720657	2.08765	0.506742	1.14741	1.46419	0.526056	0.954361	2.05893	0.884415	0.718125	1.80099	0.64706	0.980609	1.67418	0.608845	0.7369	0.894023	0.772461	0.981363
ENSMUSG00000077704	Snord89	small nucleolar RNA, C/D box 89 [Source:MGI Symbol;Acc:MGI:3819562]	109	blue	0.0494546	0.513313	-0.0733367	0.332009	-0.359525	8.89618e-07	0.344509	2.66007e-06	0.0587389	0.437392	0.0270771	0.72053	0.196717	0.00868264	0.516348	1.8919e-13	-0.483536	9.2734e-12	13.367	12.6018	12.4398	13.7524	12.8344	12.7101	13.5959	12.7745	13.033	13.3844	13.5869	12.6529	13.8207	13.5292	12.5801	13.6319	12.677	12.9582	14.3013	12.7944	12.8674	13.7747	13.6218	13.2553	13.4973	13.4713	12.8721
ENSMUSG00000010290	AI597479	expressed sequence AI597479 [Source:MGI Symbol;Acc:MGI:2138299]	17237	blue	0.0721131	0.340161	-0.0859733	0.255202	-0.393405	6.06554e-08	0.0870133	0.249477	-0.164773	0.0284062	0.118116	0.1174	0.246944	0.000921144	0.396424	4.70336e-08	-0.340238	3.59552e-06	1.33811	1.27568	1.44952	1.26666	1.40767	1.14923	1.31159	0.872506	1.17819	1.32418	1.24058	0.979444	1.48857	1.41275	1.32562	1.40656	1.29219	1.11885	1.57588	1.13313	0.989171	1.48139	1.20095	1.4378	1.29151	1.24196	1.23228
ENSMUSG00000026051	Ecrg4	ECRG4 augurin precursor [Source:MGI Symbol;Acc:MGI:1926146]	11976	blue	0.0517433	0.493987	0.084656	0.262583	-0.00811587	0.914621	0.369291	4.23149e-07	0.146113	0.052312	0.503005	9.68545e-13	-0.489583	4.66779e-12	0.532935	2.24367e-14	-0.571087	1.04227e-16	1.71285	0.0893888	0.240269	1.94329	0.106684	2.40911	1.83691	2.89703	0.0974929	2.05542	0	1.58998	2.48668	0	2.80408	1.69446	0.396148	0.194787	2.93612	0.270359	0.558355	2.16423	0.117666	2.69616	1.25656	0.25881	0.483769
ENSMUSG00000102319	Gm37626	predicted gene, 37626 [Source:MGI Symbol;Acc:MGI:5610854]	4562	blue	-0.0588315	0.436669	0.0267698	0.723572	-0.384384	1.27777e-07	0.307461	3.14353e-05	-0.0219982	0.771335	0.291373	8.32947e-05	0.0494273	0.513545	0.566747	1.98902e-16	-0.592693	3.60804e-18	1.02226	0	0	0	0	0.457468	0.579303	0.153307	0	0.774241	0	0.156699	0.664418	0	0	0	0	0.17184	0.656102	0	0	0.4207	0	0	0.790275	0	0.177255
ENSMUSG00000104476	Gm38211	predicted gene, 38211 [Source:MGI Symbol;Acc:MGI:5611439]	7216	blue	-0.00412333	0.956562	-0.00636779	0.932962	-0.428756	2.6184e-09	0.311346	2.46305e-05	-0.0494129	0.513668	0.233572	0.0017549	0.14432	0.0553018	0.602382	7.34598e-19	-0.605244	4.54309e-19	0.605485	0	0	0.608605	0	0.109202	0.272931	0	0	0.201236	0.34631	0.101025	0.317918	0	0	0.43081	0	0.110992	0.684125	0.296363	0.108937	0.401713	0	0	0.299323	0	0
ENSMUSG00000100213	Gm28151	predicted gene 28151 [Source:MGI Symbol;Acc:MGI:5578857]	950	blue	0.0698532	0.355548	0.000866522	0.990867	-0.276073	0.000199665	0.590703	4.96997e-18	0.279623	0.000163732	0.0722524	0.339226	0.048648	0.520215	0.533856	1.98648e-14	-0.499838	1.41239e-12	2.31067	1.77288	1.71564	3.16548	1.96445	2.3732	3.27805	1.88438	2.17803	3.1633	1.02176	2.27999	2.50627	2.89988	1.06578	2.84149	2.31715	2.8226	2.89763	2.15845	2.79859	3.19052	2.07512	2.2655	2.64478	1.16254	2.25299
ENSMUSG00000100671	Gm28322	predicted gene 28322 [Source:MGI Symbol;Acc:MGI:5579028]	1474	blue	-0.0487193	0.519603	0.0537473	0.477389	-0.205266	0.00612919	0.513972	2.54362e-13	0.22449	0.00266526	0.204778	0.00625452	-0.110756	0.142213	0.547022	3.34133e-15	-0.560021	5.31609e-16	2.45093	0	0	1.83556	0	0.823656	1.33875	0.429745	1.43514	1.97494	0	0.438398	0.681177	0.760696	0.769466	0.648801	0	0.8343	1.7554	0	1.10562	0.60781	1.25149	0.433634	1.42928	0	0
ENSMUSG00000002881	Nab1	Ngfi-A binding protein 1 [Source:MGI Symbol;Acc:MGI:107564]	43385	blue	-0.0244368	0.746805	0.0536298	0.478354	-0.555455	1.02316e-15	0.286872	0.000108287	-0.21636	0.00382273	0.640601	7.86068e-22	-0.0592916	0.433085	0.841299	1.26763e-48	-0.847697	4.65462e-50	1.51846	1.19411	1.17028	1.64605	0.934336	1.34667	1.60582	1.4567	1.09668	1.13423	0.927893	1.39435	1.49809	0.868383	1.26333	1.26807	1.21775	1.15296	1.51441	1.207	1.38826	1.42819	1.02299	1.26645	1.43644	1.16833	1.25604
ENSMUSG00000026102	Inpp1	inositol polyphosphate-1-phosphatase [Source:MGI Symbol;Acc:MGI:104848]	32261	blue	0.0195213	0.796486	-0.0810852	0.283319	-0.673431	9.70795e-25	0.287865	0.000102233	-0.183412	0.0145411	0.0522366	0.489873	0.518677	1.41212e-13	0.705085	6.38745e-28	-0.598883	1.31322e-18	1.47448	1.15955	1.06567	1.23978	1.27773	1.23528	1.46996	1.23119	1.08133	1.14097	1.57155	1.17983	1.50959	1.26051	1.05556	1.58391	1.16569	1.08876	1.52246	1.10278	1.12129	1.45814	1.27474	1.38849	1.48801	1.29798	1.13857
ENSMUSG00000026097	Ormdl1	ORM1-like 1 (S. cerevisiae) [Source:MGI Symbol;Acc:MGI:2181669]	13214	blue	-0.00046597	0.995089	-0.0101779	0.893045	-0.607154	3.28756e-19	0.195636	0.0090649	-0.249915	0.000794396	0.367481	4.86526e-07	0.240793	0.00124451	0.719307	1.71501e-29	-0.689812	2.46287e-26	0.650359	0.809909	0.692323	0.803312	0.354159	0.471403	0.889833	0.431206	0.762976	1.35223	0.736997	0.521772	0.79946	0.550599	0.632463	1.00971	0.704914	0.565966	1.21742	0.641911	0.556939	0.862535	0.469973	0.555176	0.86268	0.123059	0.491802
ENSMUSG00000026094	Stk17b	serine/threonine kinase 17b (apoptosis-inducing) [Source:MGI Symbol;Acc:MGI:2138162]	29718	blue	-0.0151644	0.841222	-0.0177752	0.814344	-0.885741	3.17557e-60	0.237109	0.00148493	-0.363707	6.49085e-07	0.499398	1.48803e-12	0.378385	2.07157e-07	0.947317	1.88359e-88	-0.907564	7.48922e-68	1.78138	0.523962	0.328369	1.45048	0.455392	0.131543	1.52158	0.311447	0.479681	1.61903	0.44607	0.338214	1.80085	0.311575	0.253655	1.63804	0.518995	0.256021	1.64222	0.501103	0.445569	1.32612	0.31001	0.209791	1.65784	0.481215	0.311295
ENSMUSG00000041075	Fzd7	frizzled class receptor 7 [Source:MGI Symbol;Acc:MGI:108570]	4531	blue	0.0231755	0.759463	0.0371115	0.623846	-0.645952	2.79042e-22	0.297141	5.91204e-05	-0.229032	0.00216689	0.654371	5.24259e-23	-0.00438515	0.953806	0.906492	1.95809e-67	-0.906929	1.32467e-67	2.0407	0.225209	0.676909	2.06209	0.857143	1.00131	2.57896	0.928321	0.636323	2.64257	0.518108	0.657725	2.51386	0.53778	1.10175	2.17311	0	0.172947	2.59086	0.446976	0.700046	2.19515	0.29232	0.752228	2.04306	0.333053	0.33714
ENSMUSG00000104052	Gm38125	predicted gene, 38125 [Source:MGI Symbol;Acc:MGI:5611353]	3437	blue	0.0827281	0.273645	0.0958871	0.204233	-0.464488	7.398e-11	0.437921	1.09065e-09	0.0950489	0.208234	0.0920527	0.222999	0.254475	0.000630782	0.535731	1.54838e-14	-0.558681	6.44908e-16	1.06686	0	0	0.526785	0.341909	0	0.523304	0	0	0.394252	0	0	1.19785	0	0	0.314448	0.287128	0.223914	0.594101	0	0.219922	1.23155	0.374178	0.379338	0.976842	0.424741	0.230844
ENSMUSG00000101599	Gm20342	predicted gene, 20342 [Source:MGI Symbol;Acc:MGI:5012527]	9719	blue	0.132853	0.0779345	0.111596	0.139196	-0.435093	1.433e-09	0.557495	7.64638e-16	0.151733	0.0437931	0.22891	0.00217907	0.074784	0.322529	0.623061	2.03955e-20	-0.643516	4.48248e-22	0.660638	0.211045	0.223387	1.06417	0	0.159322	0.761978	0.658906	0.119221	0.830207	0.264757	0.14758	0.714258	0.79668	0.279452	0.680651	0.302901	0.307428	0.705458	0.225663	0.368677	0.778343	0.394115	0.145814	0.677311	0.164865	0.167007
ENSMUSG00000025968	Ndufs1	NADH:ubiquinone oxidoreductase core subunit S1 [Source:MGI Symbol;Acc:MGI:2443241]	33237	blue	0.059095	0.434614	-0.0296247	0.695484	-0.371374	3.59972e-07	0.152619	0.0425628	-0.165724	0.0274919	0.11643	0.122762	0.255625	0.000594714	0.454884	2.01002e-10	-0.367809	4.7442e-07	2.25234	2.20663	2.25423	2.29177	2.20011	2.18072	2.18566	2.18738	2.12115	2.01961	2.3064	2.13802	2.09252	2.03911	2.16489	2.19412	2.23627	2.30992	2.16271	2.26672	2.22067	2.25926	2.32514	2.11876	2.06304	2.13698	2.29095
ENSMUSG00000061816	Myl1	myosin, light polypeptide 1 [Source:MGI Symbol;Acc:MGI:97269]	21109	blue	-0.039487	0.601795	-0.070083	0.353964	0.085903	0.255592	0.299131	5.24391e-05	0.272992	0.000236668	-0.188085	0.012176	0.0593613	0.432543	0.0886975	0.240396	-0.0467616	0.536541	0.123182	0	0	0.0999791	0	0	0.14638	0	0.0561177	0.206025	0	0.0353365	0.171735	0.0683023	0.0350633	0.110104	0	0.0389101	0.058637	0.0551649	0.0753599	0.0518398	0	0	0.211182	0	0.0401953
ENSMUSG00000039323	Igfbp2	insulin-like growth factor binding protein 2 [Source:MGI Symbol;Acc:MGI:96437]	27971	blue	-0.00757003	0.920344	0.0946167	0.210319	-0.0891613	0.237936	0.17694	0.0184739	-0.031125	0.680884	0.578955	3.1515e-17	-0.427884	2.84202e-09	0.500431	1.31647e-12	-0.545002	4.41475e-15	1.12246	1.00906	0.661666	1.23502	0.513186	1.66473	1.16074	1.46228	0.442761	1.32539	0.469838	1.03416	1.55572	0.487971	1.49544	0.990973	0.624029	0.539907	1.94439	0.527305	0.609841	1.39452	0.485658	1.33064	0.826409	0.705731	0.616401
ENSMUSG00000026185	Igfbp5	insulin-like growth factor binding protein 5 [Source:MGI Symbol;Acc:MGI:96440]	16952	blue	0.0140155	0.85311	0.00797106	0.916139	-0.0362523	0.631906	0.511582	3.41785e-13	0.241816	0.00118438	0.398548	3.92662e-08	-0.445571	5.14602e-10	0.579117	3.07394e-17	-0.588612	6.94314e-18	3.06712	2.8811	3.08018	3.3573	2.81119	2.80557	3.04777	3.09473	2.86248	3.38266	2.57675	3.15451	3.18277	2.36894	3.01375	3.27654	2.49654	2.98994	3.09447	2.83097	2.90889	3.19453	2.58083	2.83967	3.2612	2.38787	3.15636
ENSMUSG00000006299	Aamp	angio-associated migratory protein [Source:MGI Symbol;Acc:MGI:107809]	4898	blue	-0.121291	0.107795	-0.107177	0.155641	-0.429112	2.53192e-09	-0.124083	0.0998686	-0.492794	3.22414e-12	0.755809	5.22052e-34	-0.14312	0.0573821	0.701549	1.51899e-27	-0.662231	1.04813e-23	5.38927	5.03926	5.04009	5.54751	4.77928	5.17396	5.56468	5.41852	4.7631	5.57077	4.99896	5.2429	5.58054	4.79415	5.37143	5.52718	5.24531	5.10685	5.54738	4.68334	5.05981	5.53147	4.96973	5.13268	5.64139	4.67256	5.01315
ENSMUSG00000006301	Tmbim1	transmembrane BAX inhibitor motif containing 1 [Source:MGI Symbol;Acc:MGI:1916910]	17375	blue	-0.044766	0.554085	-0.0232632	0.75858	-0.418611	6.69875e-09	0.264235	0.000379573	-0.0937191	0.214698	0.286313	0.000111842	0.142045	0.0592998	0.601418	8.62621e-19	-0.563491	3.2102e-16	1.05859	1.07138	0.999446	1.50119	0.884736	1.26557	1.42578	1.21703	0.973624	1.0404	1.01012	0.858669	0.863218	1.0428	0.877264	1.34573	0.799521	0.676108	1.35742	0.649159	1.18294	1.30264	0.909649	0.920193	1.16661	0.686575	1.06928
ENSMUSG00000026200	Glb1l	galactosidase, beta 1-like [Source:MGI Symbol;Acc:MGI:1921827]	12577	blue	-0.0888786	0.239433	0.0397166	0.599682	-0.353128	1.42839e-06	0.368327	4.55832e-07	0.0419391	0.579405	0.129041	0.0869369	0.126936	0.0922548	0.540956	7.67008e-15	-0.552679	1.51608e-15	0.607489	0.085241	0.175576	0.444997	0.101762	0.239347	0.237848	0.31499	0	0.679118	0.39102	0	0.27759	0.112862	0.114477	0.484721	0.163957	0.29797	0.762319	0.0914219	0.12433	0.452523	0.216405	0.167717	0.673819	0.129021	0.191888
ENSMUSG00000026203	Dnajb2	DnaJ heat shock protein family (Hsp40) member B2 [Source:MGI Symbol;Acc:MGI:1928739]	9286	blue	0.00270899	0.971453	0.0994132	0.188006	-0.382571	1.48016e-07	0.15202	0.0433911	-0.208103	0.00544404	0.558009	7.10289e-16	-0.139154	0.0647179	0.646551	2.48202e-22	-0.627086	9.83911e-21	2.76016	2.04703	2.53381	2.91166	2.36663	2.52759	3.06411	2.44929	2.3639	2.4383	2.22942	2.35466	2.79469	2.4352	2.75708	2.93928	2.36647	2.69346	2.46629	2.09706	2.47798	2.73452	2.17218	2.46158	2.94839	2.26339	2.13879
ENSMUSG00000104018	4833412K13Rik	RIKEN cDNA 4833412K13 gene [Source:MGI Symbol;Acc:MGI:1921857]	1478	blue	-0.0480127	0.525685	0.0296815	0.694929	-0.472582	3.10942e-11	0.522043	9.21809e-14	0.105663	0.1616	0.204702	0.00627437	0.141506	0.0602796	0.644927	3.40854e-22	-0.646168	2.6751e-22	2.88071	1.35264	1.07125	1.83274	0	0.821956	2.18863	0.428739	0	2.21846	0.733174	0.77254	1.48823	0.759095	1.0385	1.09265	1.01733	1.11857	1.75265	0	0.46773	1.85305	1.24922	0.764995	2.46016	0	1.1444
ENSMUSG00000026248	Mrpl44	mitochondrial ribosomal protein L44 [Source:MGI Symbol;Acc:MGI:1916413]	5427	blue	-0.0162943	0.829564	-0.0552682	0.464997	-0.620512	3.21835e-20	-0.0964221	0.201708	-0.405676	2.12289e-08	0.316091	1.81977e-05	0.381138	1.6615e-07	0.465427	6.69807e-11	-0.45463	2.06317e-10	2.78532	2.13267	2.37819	2.52228	2.43392	2.68633	2.36561	2.25394	2.18536	3.13126	2.25935	2.28032	2.68003	2.6508	2.24244	3.17316	1.97405	2.20642	2.58538	2.58571	2.3412	2.64739	2.45959	2.20754	2.95319	2.58171	2.24379
ENSMUSG00000104374	Gm37517	predicted gene, 37517 [Source:MGI Symbol;Acc:MGI:5610745]	1288	blue	0.0535907	0.478675	0.0247858	0.743314	-0.62691	1.01598e-20	0.547787	3.00534e-15	0.0394971	0.601702	0.326408	9.25608e-06	0.19226	0.0103567	0.818666	5.1376e-44	-0.807227	6.33476e-42	1.29914	0	0	2.17891	0	0.526602	2.7727	0.48244	0	2.37657	0	1.15	2.15476	0	0	2.47225	0	0	3.08376	0.712646	0.525488	2.20089	0	0.48673	2.08044	0	0
ENSMUSG00000036766	Dner	delta/notch-like EGF repeat containing [Source:MGI Symbol;Acc:MGI:2152889]	326382	blue	0.0289731	0.70186	-0.0360421	0.633885	-0.82173	1.33554e-44	0.336673	4.60802e-06	-0.261282	0.000443533	0.41845	6.79756e-09	0.321076	1.31673e-05	0.953644	3.41224e-93	-0.899948	5.42807e-65	1.50976	0.595788	0.548067	1.33736	0.575336	0.553507	1.5528	0.604332	0.51958	1.44757	0.633983	0.633821	1.63915	0.688356	0.518827	1.66432	0.538232	0.535146	1.53711	0.53227	0.600989	1.54665	0.665581	0.565407	1.74636	0.653691	0.55364
ENSMUSG00000036707	Cab39	calcium binding protein 39 [Source:MGI Symbol;Acc:MGI:107438]	58135	blue	-0.173053	0.0212556	-0.0478433	0.527147	-0.317488	1.66296e-05	-0.0478298	0.527265	-0.305363	3.58124e-05	0.584821	1.26489e-17	-0.12304	0.102774	0.504292	8.29898e-13	-0.501793	1.11942e-12	1.81077	1.75845	1.63219	1.64318	1.84518	1.61784	1.671	1.60043	1.58588	1.8706	1.71066	1.68878	1.73363	1.58826	1.59826	1.8619	1.8338	1.68862	1.79501	1.62316	1.53527	1.71002	1.56591	1.40309	1.79129	1.29702	1.6193
ENSMUSG00000026238	Ptma	prothymosin alpha [Source:MGI Symbol;Acc:MGI:97803]	3986	blue	-0.0622623	0.410351	-0.118323	0.116754	-0.260292	0.000467122	0.476742	1.97383e-11	0.124575	0.098521	0.0745629	0.323966	0.107349	0.154974	0.641118	7.11894e-22	-0.54466	4.62682e-15	5.58399	5.01362	5.37246	5.55985	5.34564	5.24293	5.46496	5.18648	4.97534	5.23197	5.11453	5.08575	5.56729	5.05964	5.12947	5.42622	4.71446	4.92547	5.54512	4.99832	4.92562	5.26281	5.25839	5.29462	5.83645	5.05201	5.24628
ENSMUSG00000102649	Gm38021	predicted gene, 38021 [Source:MGI Symbol;Acc:MGI:5611249]	1559	blue	0.0488938	0.518106	0.0727916	0.335625	-0.281089	0.000150739	0.587514	8.26653e-18	0.29555	6.50334e-05	0.0541131	0.474392	0.0882019	0.243044	0.492033	3.52107e-12	-0.50401	8.58559e-13	1.49074	0.576298	0.430834	1.7778	0	0	0.567523	0.409338	0	1.25438	0	0	1.94588	0	0	1.38444	0	0.454335	2.12762	1.03951	0.787493	1.3139	0	1.41011	1.875	0	0.46733
ENSMUSG00000079436	Kcnj13	potassium inwardly-rectifying channel, subfamily J, member 13 [Source:MGI Symbol;Acc:MGI:3781032]	8366	blue	0.103918	0.168674	0.0723332	0.338685	0.222384	0.00292983	0.41024	1.42109e-08	0.330954	6.81771e-06	0.253266	0.000670828	-0.517285	1.68244e-13	0.311813	2.39118e-05	-0.335672	4.93772e-06	1.36419	0.126314	0.090653	1.3948	0.286572	2.26246	0.854671	2.20385	0	0.472304	0	1.32282	1.18641	0	2.10097	0.678351	0.124948	0.0962314	1.76863	0.259058	0.183078	1.25381	0	2.27208	0.922143	0.189843	0.651041
ENSMUSG00000087968	Gm25395	predicted gene, 25395 [Source:MGI Symbol;Acc:MGI:5455172]	271	blue	-0.120104	0.11131	-0.0515734	0.495408	-0.462736	8.899e-11	0.0870076	0.249508	-0.238056	0.00141936	0.337849	4.24721e-06	0.205039	0.00618734	0.555539	1.0111e-15	-0.532009	2.53518e-14	3.89587	0	0	3.60631	0	2.86418	3.22004	1.52974	2.84381	4.38738	2.20541	3.12527	4.37109	0	1.54414	2.03164	0	2.39473	4.5618	0	1.62689	3.93064	0	0	3.35178	2.41729	1.67839
ENSMUSG00000070738	Dgkd	diacylglycerol kinase, delta [Source:MGI Symbol;Acc:MGI:2138334]	91893	blue	0.0902	0.232491	-0.00552223	0.941847	-0.667732	3.30017e-24	0.295308	6.59793e-05	-0.253919	0.000648902	0.495486	2.35704e-12	0.132091	0.0796727	0.895375	2.20563e-63	-0.845331	1.60767e-49	1.27071	1.02948	1.0569	1.20302	0.918561	0.986787	1.46364	1.23762	0.878331	1.1972	0.962032	1.04225	1.27673	0.985539	1.05225	1.39032	0.840511	1.0523	1.37898	0.995566	0.897059	1.3532	1.02145	1.04473	1.54557	1.06235	1.07711
ENSMUSG00000103996	4833421G17Rik	RIKEN cDNA 4833421G17 gene [Source:MGI Symbol;Acc:MGI:1921007]	843	blue	0.0301984	0.689887	0.0153556	0.839247	-0.479628	1.43501e-11	0.495626	2.31899e-12	0.0832571	0.270579	0.222099	0.00296737	0.114099	0.13049	0.646664	2.4273e-22	-0.656226	3.6006e-23	1.08132	0	1.19358	1.4838	0	0	2.19073	0	0	1.18984	0	0.696791	2.3842	0	0	0.994884	0.92434	0	1.02765	0	0.74104	1.90626	0	0	0.990458	0	0.771856
ENSMUSG00000044783	Hjurp	Holliday junction recognition protein [Source:MGI Symbol;Acc:MGI:2685821]	15162	blue	0.00195064	0.979443	0.0808938	0.284461	-0.583517	1.55199e-17	0.358985	9.26263e-07	-0.0127506	0.866236	0.0117011	0.877156	0.380612	1.73338e-07	0.519516	1.27032e-13	-0.488638	5.20086e-12	1.16411	1.14516	1.19422	1.51006	1.22262	0.774869	1.37065	0.684556	0.955142	1.14473	1.19611	0.786556	1.23223	1.49695	0.918795	1.52457	0.92488	0.992449	1.28912	1.36385	1.10915	1.50269	0.797709	0.966756	1.54613	1.11371	1.04407
ENSMUSG00000049866	Arl4c	ADP-ribosylation factor-like 4C [Source:MGI Symbol;Acc:MGI:2445172]	29096	blue	-0.0120402	0.873625	-0.0439812	0.561061	-0.796452	4.43569e-40	0.175612	0.0193863	-0.368984	4.33311e-07	0.421751	5.02516e-09	0.354975	1.2471e-06	0.866564	1.04456e-54	-0.794847	8.172e-40	1.88114	1.12692	1.07051	1.80689	0.985002	0.767266	1.61636	0.896356	1.19845	1.72316	1.14479	1.2099	1.63662	1.18031	0.920235	1.61885	1.13525	1.10455	1.64925	1.03301	1.15411	1.60588	1.15329	0.970263	1.81394	1.17222	1.28381
ENSMUSG00000103252	Gm37521	predicted gene, 37521 [Source:MGI Symbol;Acc:MGI:5610749]	2044	blue	-0.00934469	0.901755	0.0866698	0.251358	-0.407133	1.8689e-08	0.421894	4.9598e-09	0.055638	0.46201	0.256251	0.000575909	0.0503245	0.505921	0.538224	1.10905e-14	-0.559083	6.08605e-16	0.546224	0.458917	0.339635	0.454737	0	0	1.07234	0.585406	0	0.612052	0	0	0.903296	0	0	0	0	0.645834	0.892803	0	0.635791	0	0	0	1.39394	0	0
ENSMUSG00000067071	Hes6	hairy and enhancer of split 6 [Source:MGI Symbol;Acc:MGI:1859852]	2555	blue	-0.0233875	0.757331	0.0525932	0.48691	-0.473016	2.96641e-11	0.226287	0.00245689	-0.172123	0.0219721	0.371622	3.53082e-07	0.122848	0.103317	0.7064	4.61351e-28	-0.646725	2.39879e-22	3.45175	2.67648	2.06531	2.911	2.41062	2.50172	2.58485	3.10551	2.97851	3.17507	2.27238	2.09685	3.37846	1.92747	3.15817	3.25062	2.36378	2.87263	3.40544	2.18343	2.49872	3.09705	2.7173	2.39175	3.33865	2.80459	2.37895
ENSMUSG00000026273	Mterf4	mitochondrial transcription termination factor 4 [Source:MGI Symbol;Acc:MGI:1918355]	6704	blue	-0.100129	0.18483	-0.00278958	0.970605	-0.333491	5.73568e-06	0.186126	0.013123	-0.0533664	0.48052	0.142879	0.0578076	0.198065	0.00822612	0.404712	2.30894e-08	-0.389274	8.55571e-08	1.08586	0.9362	0.979041	1.16524	1.15961	0.884691	1.15892	0.994083	1.0868	1.38468	1.11643	1.01076	0.614207	1.04865	1.16313	1.39129	0.840182	0.827575	1.03203	1.07353	0.6699	0.758041	0.814774	0.944944	0.696385	0.610245	1.37923
ENSMUSG00000103973	BC055308	cDNA sequence BC055308 [Source:MGI Symbol;Acc:MGI:3039612]	2537	blue	0.0193761	0.797966	0.103515	0.170344	-0.301186	4.62879e-05	0.565331	2.45095e-16	0.234455	0.00168361	0.220616	0.00316998	-0.00263466	0.972236	0.589531	5.99576e-18	-0.605358	4.45641e-19	1.84629	0.380434	0.513704	0	0	0.291193	1.12744	0.853132	0	2.13946	0.470758	0.498379	1.63395	0	0.690725	0.992616	0.376655	0.295676	1.25131	1.19991	0	1.78043	1.13975	0.493067	2.56524	0	0.555969
ENSMUSG00000047496	Rnf152	ring finger protein 152 [Source:MGI Symbol;Acc:MGI:2443787]	79796	blue	0.0279941	0.711479	0.0208355	0.783113	-0.872317	2.87202e-56	0.260433	0.000463696	-0.351783	1.57584e-06	0.523748	7.41403e-14	0.316214	1.8054e-05	0.952125	5.36324e-92	-0.918787	1.49008e-72	1.73741	0.73286	0.392609	1.89686	0.687513	0.57593	1.93899	0.578745	0.759169	1.74642	0.679054	0.583534	1.72571	0.522117	0.598497	1.81456	0.750961	0.577015	1.66072	0.676306	1.32404	1.81011	0.606825	0.662589	1.99335	0.695361	0.458065
ENSMUSG00000104044	Gm37566	predicted gene, 37566 [Source:MGI Symbol;Acc:MGI:5610794]	4354	blue	0.0924021	0.22124	0.108293	0.151356	-0.341146	3.37364e-06	0.549819	2.26497e-15	0.23946	0.00132704	0.107323	0.155073	0.121097	0.108364	0.492615	3.29168e-12	-0.525448	5.95884e-14	0.518173	0	0.169425	0.430709	0	0.176729	0.601917	0.160238	0	0.319704	0	0.163775	1.28098	0.30457	0	0.822916	0	0.179558	0.851548	0.249715	0.176309	0.438028	0.303037	0.439471	0.65369	0	0.185202
ENSMUSG00000009907	Vps4b	vacuolar protein sorting 4B [Source:MGI Symbol;Acc:MGI:1100499]	32657	blue	0.0269497	0.72179	0.044431	0.557057	-0.300922	4.70365e-05	0.0605188	0.423607	-0.252696	0.000690504	0.477861	1.74492e-11	-0.127084	0.0918728	0.520102	1.17951e-13	-0.492055	3.51199e-12	1.49307	1.36206	1.45651	1.29929	1.54297	1.23587	1.38439	1.4616	1.34386	1.40802	1.43751	1.33493	1.4701	1.21176	1.45067	1.25343	1.21477	1.42153	1.39812	1.45335	1.38503	1.3297	1.22652	1.3864	1.36701	1.17697	1.39251
ENSMUSG00000102687	Gm37219	predicted gene, 37219 [Source:MGI Symbol;Acc:MGI:5610447]	925	blue	0.00563547	0.940657	0.0295401	0.69631	-0.435037	1.44072e-09	0.476033	2.13389e-11	0.0904881	0.230997	0.223344	0.0028064	0.132048	0.0797718	0.673292	1.00044e-24	-0.669463	2.28213e-24	3.19162	0	0	1.3992	0	0.690114	0.857843	0.635004	0	1.73785	1.04141	0	1.54755	0	0.642864	1.89325	0	0.699422	2.7398	0.918001	0	2.11758	1.07054	1.08234	2.86698	0	0
ENSMUSG00000026385	Dbi	diazepam binding inhibitor [Source:MGI Symbol;Acc:MGI:94865]	7798	blue	-0.0190401	0.801397	-0.0576962	0.445586	-0.629866	5.91013e-21	0.324775	1.03182e-05	-0.218564	0.00347094	0.512673	2.98752e-13	0.136366	0.0703197	0.935457	5.80143e-81	-0.889135	2.6464e-61	6.48853	5.39683	5.5457	6.79495	5.21672	5.72861	6.88709	5.887	5.05359	6.79593	5.15566	5.59658	6.8145	5.27788	5.79552	6.68009	5.02	5.38712	6.70468	5.05229	5.55728	6.70728	5.36444	5.74124	6.86592	5.26376	5.49843
ENSMUSG00000003721	Insig2	insulin induced gene 2 [Source:MGI Symbol;Acc:MGI:1920249]	28236	blue	0.0861336	0.254314	0.0143801	0.849334	-0.221073	0.00310623	0.0386028	0.609961	-0.221651	0.00302736	0.447313	4.32525e-10	-0.161143	0.032137	0.472532	3.12638e-11	-0.459685	1.22436e-10	1.485	1.43721	1.59338	1.39846	1.41154	1.45853	1.49036	1.56381	1.10866	1.72036	1.52208	1.59481	1.60768	1.66662	1.78498	1.41147	1.72474	1.47407	1.41932	1.61772	1.56772	1.70936	1.59378	1.56488	1.42187	1.34584	1.58811
ENSMUSG00000102801	Gm37478	predicted gene, 37478 [Source:MGI Symbol;Acc:MGI:5610706]	3494	blue	0.0845091	0.263415	0.10908	0.14839	-0.435857	1.33151e-09	0.476835	1.95393e-11	0.127752	0.0901631	0.232253	0.00186653	0.112499	0.136006	0.55902	6.14236e-16	-0.59421	2.82235e-18	1.05451	0.285804	0	0.722718	0	0.217099	0.281022	0.197092	0	1.34805	0	0.201388	1.01314	0.370616	0.199916	0.564744	0	0.731736	0.322631	0.305077	0.404869	0.913903	0.368791	0.373886	1.41502	0	0
ENSMUSG00000104205	Gm37396	predicted gene, 37396 [Source:MGI Symbol;Acc:MGI:5610624]	1494	blue	0.0340895	0.652387	0.0190887	0.8009	-0.503416	9.21903e-13	0.566034	2.20988e-16	0.174192	0.0204051	0.0748091	0.322367	0.283059	0.000134782	0.618256	4.80215e-20	-0.614465	9.34144e-20	2.05259	0.596822	0	1.00998	0	0.464448	2.00636	0	0	1.66398	0	0.433328	2.52681	0.75276	0	1.08442	0	0.471193	1.97471	0	0	1.61717	0	0	1.91995	0	0.484594
ENSMUSG00000102902	Gm38263	predicted gene, 38263 [Source:MGI Symbol;Acc:MGI:5611491]	3058	blue	0.0535602	0.478925	0.125125	0.0970334	-0.592526	3.70682e-18	0.448709	3.7606e-10	0.0196846	0.79482	0.323027	1.15832e-05	0.16923	0.0243364	0.684106	9.1026e-26	-0.734419	2.85115e-31	1.65695	0	0	1.31383	0.379153	0	0.5767	0.223122	0	2.06312	0	0.424734	2.57163	0.416479	0	0.864855	0.319041	0.249393	2.23953	0.34376	0	1.81782	0.414459	0.591706	2.26559	0.469635	0.257043
ENSMUSG00000026342	Slc35f5	solute carrier family 35, member F5 [Source:MGI Symbol;Acc:MGI:1921400]	35225	blue	-0.0700801	0.353984	0.0928429	0.219035	-0.552701	1.51145e-15	0.230294	0.0020444	-0.21391	0.00425129	0.56034	5.07659e-16	0.0318189	0.674171	0.759798	1.49889e-34	-0.794623	8.89636e-40	1.06695	0.520682	0.404306	0.791631	0.47655	0.717492	0.890065	0.699876	0.414428	1.09393	0.384801	0.50188	1.09512	0.267086	0.543031	0.928255	0.558464	0.576733	1.08312	0.408181	0.519863	0.76688	0.490035	0.526237	1.15578	0.415782	0.474474
ENSMUSG00000102800	Gm37479	predicted gene, 37479 [Source:MGI Symbol;Acc:MGI:5610707]	3840	blue	0.044489	0.556542	0.0460334	0.54291	-0.244115	0.00105882	0.39133	7.21342e-08	0.130477	0.0834534	0.116466	0.122646	0.0413338	0.584895	0.449591	3.44151e-10	-0.453953	2.2109e-10	0.316136	0.262251	0	0	0	0	0	0	0.284561	0	0	0	0.549198	0	0	0.52201	0	0.201982	0.296344	0	0	0	0	0	0.519314	0	0
ENSMUSG00000103803	Gm37064	predicted gene, 37064 [Source:MGI Symbol;Acc:MGI:5610292]	2230	blue	-0.0775072	0.305173	0.0390387	0.605929	-0.28509	0.000120001	0.387617	9.80847e-08	0.107625	0.153908	0.233132	0.00179145	0.00162175	0.982908	0.52677	5.02362e-14	-0.558996	6.16335e-16	0.507789	0	0.314171	0	0	0	0	0.544701	0	1.55455	0.525021	0	0.484263	0	0.302031	0.807933	0	0.332019	0.836181	0	0	1.02783	0	0	1.08347	0	0
ENSMUSG00000102139	Gm37109	predicted gene, 37109 [Source:MGI Symbol;Acc:MGI:5610337]	2253	blue	-0.0268216	0.723059	0.0374297	0.620872	-0.376622	2.38336e-07	0.345962	2.39842e-06	0.0668822	0.376429	0.151223	0.0445157	0.151724	0.0438059	0.446766	4.56838e-10	-0.488493	5.28779e-12	1.17165	0.421984	0	0.741851	0	0	0	0	0	1.28584	0.520521	0	0.839635	0	0.299246	1.08036	0	0	0.829688	0	0	0.753235	0	0	0.453369	0	0
ENSMUSG00000101778	Gm29488	predicted gene 29488 [Source:MGI Symbol;Acc:MGI:5580194]	2401	blue	-0.020116	0.790427	0.114166	0.130262	-0.411267	1.29721e-08	0.48007	1.36624e-11	0.118103	0.117439	0.165945	0.0272837	0.126918	0.0923012	0.544878	4.49055e-15	-0.543986	5.07532e-15	0.476977	0	0	0.705649	0.46762	0.306053	0.392816	0	0	0.535914	0	0.522053	0.799855	0	0.282491	0	0	0	0.448577	0	0	0.716604	0	0	0.429187	0	0
ENSMUSG00000026433	Rab29	RAB29, member RAS oncogene family [Source:MGI Symbol;Acc:MGI:2385107]	5663	blue	0.0202414	0.789151	-0.0841384	0.265522	-0.082824	0.273088	0.129466	0.0858948	-0.0259823	0.731387	0.237573	0.00145242	-0.130761	0.0827782	0.31958	1.45193e-05	-0.291447	8.29336e-05	1.41211	0.856828	1.10412	0.618201	0.721805	0.585901	1.04369	1.12044	0.670295	0.966179	0.898608	1.07665	1.17412	0.928725	1.24827	0.915975	1.04907	1.15239	1.25798	0.660987	1.13705	0.750072	0.924898	0.63002	1.21542	0.698934	1.36721
ENSMUSG00000042115	Klhdc8a	kelch domain containing 8A [Source:MGI Symbol;Acc:MGI:2442630]	8731	blue	-0.0245853	0.745319	-0.020497	0.786552	-0.673914	8.73943e-25	-0.00225115	0.976276	-0.349271	1.89093e-06	0.165731	0.0274856	0.474917	2.41124e-11	0.501057	1.22206e-12	-0.459483	1.2504e-10	0.896856	0.974114	0.85426	1.40499	1.10972	0.66438	1.48918	0.768055	1.03904	0.899927	1.29718	0.83134	1.4499	1.63686	0.673374	1.76414	1.53958	0.842477	1.32443	0.957818	1.15811	1.51477	1.03496	0.87084	1.49073	1.31171	0.628969
ENSMUSG00000026439	Rbbp5	retinoblastoma binding protein 5, histone lysine methyltransferase complex subunit [Source:MGI Symbol;Acc:MGI:1918367]	28294	blue	0.0736224	0.330123	-0.152183	0.0431648	-0.340915	3.42881e-06	0.285947	0.000114229	-0.0833187	0.270224	0.430116	2.30296e-09	-0.0926838	0.219829	0.659659	1.7845e-23	-0.629801	5.98116e-21	1.35769	0.920537	1.13019	1.48205	0.857708	1.08612	1.60639	1.15655	1.14618	1.57777	1.09874	1.2995	1.25292	0.95638	1.01995	1.34388	1.17456	1.1792	1.31353	0.970584	1.02869	1.208	1.08068	1.1997	1.54156	0.699345	1.17932
ENSMUSG00000053024	Cntn2	contactin 2 [Source:MGI Symbol;Acc:MGI:104518]	33829	blue	0.0334026	0.658947	-0.117931	0.117977	-0.639109	1.04542e-21	0.439122	9.70526e-10	-0.0450232	0.551809	0.0311065	0.681063	0.445121	5.38108e-10	0.752459	1.46159e-33	-0.652016	8.41354e-23	2.41638	1.726	2.01121	2.64127	2.18884	1.89421	2.66239	1.8841	2.19811	2.02331	2.72542	1.68372	2.63979	2.18254	1.69657	2.56654	1.89899	1.70874	2.27998	2.09877	2.05729	2.78927	2.0138	2.06273	2.86209	1.64229	1.96676
ENSMUSG00000046062	Ppp1r15b	protein phosphatase 1, regulatory subunit 15B [Source:MGI Symbol;Acc:MGI:2444211]	8640	blue	0.0824929	0.275017	0.119482	0.113187	-0.410707	1.36344e-08	0.344947	2.57835e-06	0.00328018	0.965438	0.459898	1.19752e-10	-0.0874856	0.246907	0.600079	1.07754e-18	-0.625871	1.22738e-20	2.421	1.51631	1.75968	2.17196	1.37617	1.40152	2.13479	2.2051	1.69102	2.35767	1.70748	2.11501	2.49383	1.75232	1.88939	2.70533	1.78776	2.04933	2.62495	1.53834	1.80291	2.37883	1.89109	1.76245	2.18982	1.53929	1.80115
ENSMUSG00000026458	Ppfia4	protein tyrosine phosphatase, receptor type, f polypeptide (PTPRF), interacting protein (liprin), alpha 4 [Source:MGI Symbol;Acc:MGI:1915757]	36145	blue	0.00955785	0.899525	-0.102929	0.172789	-0.27955	0.000164412	0.521005	1.05198e-13	0.138084	0.0668238	0.159949	0.0334517	0.0191275	0.800504	0.671737	1.4004e-24	-0.586332	9.96845e-18	1.2025	0.572508	1.17688	1.18788	0.617326	0.980594	1.3904	1.14857	0.721241	1.26573	0.814171	1.00983	1.30832	0.864815	1.28497	1.25668	0.627072	0.820758	1.09666	0.585727	0.644966	1.19029	0.618205	0.990314	1.18004	0.751543	1.15121
ENSMUSG00000026452	Syt2	synaptotagmin II [Source:MGI Symbol;Acc:MGI:99666]	115916	blue	0.0461923	0.541517	-0.0207302	0.784182	-0.829212	4.44739e-46	0.328609	7.98703e-06	-0.273473	0.000230504	0.456007	1.79124e-10	0.292711	7.6979e-05	0.944998	7.37053e-87	-0.901814	1.13665e-65	1.35058	0.162043	0.325099	1.24616	0.241695	0.209939	1.4865	0.25064	0.22173	1.19276	0.345088	0.261447	1.37207	0.179426	0.170494	1.356	0.304578	0.291632	1.293	0.278512	0.298052	1.47797	0.211676	0.253048	1.73656	0.165821	0.288343
ENSMUSG00000026424	Gpr37l1	G protein-coupled receptor 37-like 1 [Source:MGI Symbol;Acc:MGI:1928503]	7447	blue	-0.0307969	0.684067	-0.0474188	0.530824	-0.745427	1.20349e-32	0.202047	0.00699914	-0.367298	4.9343e-07	0.619324	3.975e-20	0.150072	0.046181	0.953783	2.64144e-93	-0.914826	8.05719e-71	5.3413	4.0007	4.34388	5.37424	3.40971	3.95201	5.38417	3.95981	3.40008	5.54944	3.57409	4.06557	5.46721	3.71078	4.13153	5.55715	3.76579	3.86401	5.42548	3.71736	4.05797	5.34396	3.65718	3.9675	5.71417	3.57309	4.06149
ENSMUSG00000103038	Gm37124	predicted gene, 37124 [Source:MGI Symbol;Acc:MGI:5610352]	1991	blue	-0.0470539	0.533994	0.188056	0.0121897	-0.326439	9.23698e-06	0.417104	7.68187e-09	0.107913	0.152803	0.458461	1.3903e-10	-0.182465	0.0150661	0.526983	4.88705e-14	-0.608245	2.73054e-19	1.53109	0.469343	0.627611	1.33433	0	0.891385	1.32746	0	0.506428	1.66448	0	0	1.69321	0	0.334377	0.880345	0	0.659627	0.910416	0	0.360944	1.35138	0	0	0.503677	0.669893	0.378006
ENSMUSG00000102277	A130050O07Rik	RIKEN cDNA A130050O07 gene [Source:MGI Symbol;Acc:MGI:2443458]	3022	blue	0.0413146	0.58507	0.0480623	0.525257	-0.446501	4.69079e-10	0.466316	6.095e-11	0.12753	0.0907273	0.118855	0.115105	0.17692	0.0184873	0.523101	8.05395e-14	-0.559277	5.91883e-16	0.698319	0	0.238217	0.808884	0	0.248241	1.16557	0	0.352825	0.778069	0.40481	0.230451	0.66782	0	0.228783	0.635949	0.322447	0.466663	1.11037	0	0.247665	0.328327	0	0.597476	1.07115	0.474402	0.479955
ENSMUSG00000104197	Gm37632	predicted gene, 37632 [Source:MGI Symbol;Acc:MGI:5610860]	1141	blue	0.0342183	0.651159	0.176624	0.0186875	-0.146187	0.0521917	0.38289	1.44243e-07	0.198797	0.00798704	0.152462	0.0427786	-0.0761464	0.313768	0.320624	1.35632e-05	-0.329172	7.6901e-06	0	0	0.964222	0.734462	1.38469	0.582352	2.3078	0	0	0	0	0	0	0	0.541162	0.793767	0	0.590486	0.821647	1.28819	0	1.23494	0	0.538997	0	0	0
ENSMUSG00000102651	Gm37080	predicted gene, 37080 [Source:MGI Symbol;Acc:MGI:5610308]	2403	blue	0.00135043	0.985767	0.0442702	0.558487	-0.404196	2.41487e-08	0.432693	1.80316e-09	0.0931361	0.217577	0.17898	0.0171448	0.120137	0.111212	0.577055	4.21931e-17	-0.602501	7.20115e-19	2.60632	0	0	0.395256	0	0	0.700783	0.278397	0	0.535541	0.492984	0	1.68748	0.511861	0	0.431172	0	0	1.82812	0	0	1.19254	0	0	1.25383	0.574959	0
ENSMUSG00000105936	Gm43544	predicted gene 43544 [Source:MGI Symbol;Acc:MGI:5663681]	2471	blue	-0.0115328	0.87891	0.09178	0.224378	-0.462384	9.23421e-11	0.367311	4.92932e-07	-0.0163286	0.829211	0.350275	1.75841e-06	0.0705753	0.350585	0.631634	4.26287e-21	-0.660706	1.43773e-23	1.53785	0.389339	0.525203	0.38571	0	0.298219	1.14819	0	0	1.20874	0	0	1.05652	0	0	1.01166	0	0	1.0448	0	0	1.35767	0	0	0.742712	0	0
ENSMUSG00000018199	Ro60	Ro60, Y RNA binding protein [Source:MGI Symbol;Acc:MGI:106652]	26278	blue	0.110976	0.14142	0.0620512	0.411943	-0.463556	8.16313e-11	0.251605	0.000729652	-0.207108	0.00567605	0.643249	4.72109e-22	-0.158673	0.0349078	0.772235	2.60728e-36	-0.767986	1.07059e-35	2.37537	2.21454	2.23135	2.50311	2.12365	2.11278	2.7109	2.27333	2.14053	2.4103	2.1941	2.36819	2.56269	2.1464	2.52676	2.49839	2.36387	2.48276	2.73654	2.32417	2.65989	2.42734	2.17768	2.3311	2.39882	2.23766	2.22548
ENSMUSG00000100394	Gm28791	predicted gene 28791 [Source:MGI Symbol;Acc:MGI:5579497]	1778	blue	0.0150515	0.842388	0.1101	0.144606	-0.374845	2.74264e-07	0.616073	7.05274e-20	0.277529	0.000184122	0.153328	0.0415995	0.0492896	0.514721	0.574725	6.01889e-17	-0.623835	1.77406e-20	2.38762	0.516559	0	0.889032	0	0	1.18131	0	0	2.39298	0.632775	0	1.58548	0.655898	0.369696	0.957204	0.51165	0	1.57042	0.548691	0.398701	1.85046	1.10082	0.368132	1.73958	1.57785	0
ENSMUSG00000042671	Rgs8	regulator of G-protein signaling 8 [Source:MGI Symbol;Acc:MGI:108408]	47298	blue	0.0199636	0.791978	-0.0397402	0.599465	-0.84658	8.37747e-50	0.327101	8.83727e-06	-0.280401	0.000156713	0.431395	2.04011e-09	0.34671	2.27346e-06	0.959999	1.12414e-98	-0.907294	9.55051e-68	2.67138	0.555181	0.695486	2.75115	0.697661	0.588659	2.8535	0.540205	0.51081	2.83653	0.768634	0.539749	2.79939	0.795496	0.469146	2.91945	0.699618	0.573399	2.65414	0.670346	0.820347	2.62287	0.879041	0.688778	3.17878	0.457481	0.624988
ENSMUSG00000026475	Rgs16	regulator of G-protein signaling 16 [Source:MGI Symbol;Acc:MGI:108407]	5119	blue	-0.109561	0.146595	0.0276764	0.71461	-0.324127	1.07713e-05	0.0434786	0.565549	-0.260115	0.000471454	0.566155	2.17089e-16	-0.148069	0.0492038	0.526542	5.17426e-14	-0.547875	2.96864e-15	1.30465	0	0.710109	1.12672	0.442673	1.07617	1.12055	0.485081	0	0.507924	0.467222	0.268433	1.14817	0.48527	0.774119	1.30546	0.529629	0.420283	1.13579	0.850925	2.57902	1.56622	0.674844	0.589587	1.30017	1.10383	0.764715
ENSMUSG00000026466	Tor1aip1	torsin A interacting protein 1 [Source:MGI Symbol;Acc:MGI:3582693]	31881	blue	-0.021957	0.771752	-0.00162935	0.982828	-0.600647	9.80636e-19	0.21303	0.00441548	-0.24373	0.00107895	0.668622	2.73053e-24	-0.0502781	0.506314	0.78814	9.90963e-39	-0.832086	1.15171e-46	1.61618	0.542219	0.778005	1.40009	0.603085	0.848712	1.34027	0.849724	0.750884	1.6482	0.717895	0.742549	1.37312	0.71547	0.779662	1.57003	0.672201	0.800848	1.60048	0.648719	0.902947	1.60162	0.654978	0.763057	1.32965	0.491559	0.966466
ENSMUSG00000102618	Gm37848	predicted gene, 37848 [Source:MGI Symbol;Acc:MGI:5611076]	3102	blue	-0.0422671	0.57644	-0.0148657	0.844309	-0.451457	2.85014e-10	0.299394	5.1611e-05	-0.0674323	0.372507	0.250029	0.000789856	0.170356	0.0233916	0.615681	7.55319e-20	-0.621239	2.82659e-20	1.49553	0	0.232543	0	0	0	0.569941	0.411175	0	1.62723	0.395678	0	1.44385	0	0.223317	1.05613	0	0.246141	0	0	0.241784	1.58098	0.40934	0	0.619511	0	0
ENSMUSG00000103432	6720464F23Rik	RIKEN cDNA 6720464F23 gene [Source:MGI Symbol;Acc:MGI:2444677]	3495	blue	0.109187	0.147989	0.0718314	0.342056	-0.39066	7.62695e-08	0.620636	3.14811e-20	0.272531	0.000242723	0.169055	0.0244866	0.0571528	0.449889	0.595425	2.31585e-18	-0.631835	4.10684e-21	1.65691	0	0.390088	0.519443	0	0.405661	1.44358	0	0	1.66144	0	0.377981	1.18428	0.370523	0	1.42033	0	0	1.17165	0.770831	0	1.07372	0.368698	0	0.965017	0.418622	0.2273
ENSMUSG00000103200	Gm37328	predicted gene, 37328 [Source:MGI Symbol;Acc:MGI:5610556]	639	blue	0.0291097	0.700521	0.102454	0.17479	-0.380343	1.77124e-07	0.18577	0.0133019	-0.137961	0.0670696	0.392568	6.50562e-08	-0.0208515	0.782951	0.521715	9.61157e-14	-0.523854	7.31395e-14	2.43743	0	0.886795	2.79206	0	0.916827	2.17878	0.848337	1.20807	2.13114	0	0	0	0	0.858145	2.64146	0	0.928333	1.90328	1.19384	1.47063	1.77281	0	0.855042	2.90867	1.50655	1.51936
ENSMUSG00000103632	Gm38329	predicted gene, 38329 [Source:MGI Symbol;Acc:MGI:5611557]	426	blue	0.0125571	0.868248	-0.0495157	0.512791	-0.460521	1.12226e-10	0.0813071	0.281999	-0.241478	0.00120391	0.230331	0.00204088	0.218509	0.00347946	0.446076	4.89354e-10	-0.437982	1.08426e-09	2.43743	0	1.18498	1.47397	0	1.87337	0	1.13792	0	2.60192	1.72151	1.78967	2.37183	0	1.14995	0	0	1.89112	2.35359	0	2.65862	3.3312	1.76084	1.77671	0	0	1.26302
ENSMUSG00000026701	Prdx6	peroxiredoxin 6 [Source:MGI Symbol;Acc:MGI:894320]	11107	blue	-0.135386	0.0723813	-0.217337	0.00366303	0.0330017	0.662788	0.297523	5.77806e-05	0.174005	0.0205426	0.0125096	0.868742	-0.0284975	0.706527	0.304108	3.86973e-05	-0.218048	0.00355064	4.12366	3.59648	3.72377	3.87162	3.46119	3.64907	3.81318	3.63996	3.35002	4.03253	3.61833	3.45198	3.86136	3.23033	3.4965	3.85694	3.30137	3.27449	3.67203	3.42011	3.60401	3.81476	3.37099	3.61597	3.92178	3.36766	3.55324
ENSMUSG00000026698	Pigc	phosphatidylinositol glycan anchor biosynthesis, class C [Source:MGI Symbol;Acc:MGI:1914542]	4249	blue	0.0259691	0.731518	0.00843271	0.911302	-0.576062	4.91088e-17	0.13881	0.0653891	-0.273244	0.000233415	0.382751	1.45878e-07	0.21862	0.00346246	0.641056	7.20415e-22	-0.621355	2.76886e-20	2.44047	1.28764	1.54366	1.47636	1.20035	1.37988	2.23686	1.663	1.83255	2.01808	1.82136	1.57093	1.89585	1.76917	1.37233	2.30448	2.18983	1.72631	1.6139	1.45564	1.58401	1.96648	2.12208	1.49801	2.04703	1.80413	1.92874
ENSMUSG00000103763	Gm37860	predicted gene, 37860 [Source:MGI Symbol;Acc:MGI:5611088]	1033	blue	0.0681272	0.367589	0.0790581	0.295568	-0.231942	0.00189385	0.30105	4.66719e-05	0.0603907	0.42459	0.323833	1.09827e-05	-0.0833759	0.269894	0.431567	2.00721e-09	-0.456348	1.72939e-10	0.934113	0.799952	0	1.30238	0	0	0	0	0	0	0	0.591387	0	0	1.00393	1.38989	0	0.640279	1.43045	0	0	0.805393	0	0.58527	1.38439	0	0
ENSMUSG00000040713	Creg1	cellular repressor of E1A-stimulated genes 1 [Source:MGI Symbol;Acc:MGI:1344382]	11562	blue	0.0310306	0.681799	-0.0405152	0.592359	-0.77921	2.3971e-37	0.286668	0.000109576	-0.263539	0.000393831	0.374616	2.79248e-07	0.369516	4.15848e-07	0.87524	4.32562e-57	-0.821749	1.32388e-44	2.70774	1.91867	2.09922	2.6567	1.68973	2.03271	2.69133	2.03443	1.96223	2.70304	2.07628	2.07526	2.85428	2.00343	1.7763	2.90988	1.82903	1.97992	2.9382	1.71247	2.42133	2.73934	2.25849	2.16564	3.10881	2.18958	1.8396
ENSMUSG00000026563	Tada1	transcriptional adaptor 1 [Source:MGI Symbol;Acc:MGI:1196415]	14524	blue	-0.0993301	0.188378	-0.0390397	0.60592	-0.338456	4.07187e-06	0.0672422	0.373859	-0.309703	2.73179e-05	0.526294	5.3427e-14	-0.103376	0.170918	0.693908	9.4583e-27	-0.646251	2.63201e-22	2.73016	2.41193	2.34249	2.44159	2.35434	2.46773	2.40436	2.58511	2.22942	2.87209	2.3151	2.50714	3.12375	2.2216	2.6119	2.75768	2.59807	2.68779	2.72396	2.31194	2.67301	2.70709	2.47367	2.43629	2.99779	2.44773	2.68263
ENSMUSG00000040596	Pogk	pogo transposable element with KRAB domain [Source:MGI Symbol;Acc:MGI:1918842]	25241	blue	0.064243	0.395592	0.0103125	0.891639	-0.654652	4.95332e-23	0.308044	3.03125e-05	-0.180571	0.0161671	0.38643	1.08116e-07	0.171097	0.0227869	0.780101	1.75626e-37	-0.75008	3.00586e-33	1.60878	1.04367	1.3733	1.70062	1.39983	1.23191	1.83194	1.51815	1.49795	1.63078	1.45688	1.48753	1.55492	1.39057	1.29912	1.90782	1.35571	1.40386	1.73304	1.32162	1.45889	1.65158	1.3172	1.24603	1.60567	1.34385	1.28765
ENSMUSG00000097823	Gm16701	predicted gene, 16701 [Source:MGI Symbol;Acc:MGI:4439625]	2546	blue	0.0753096	0.319131	-0.0644572	0.394016	-0.339626	3.75277e-06	0.197855	0.00829587	-0.114136	0.130364	0.388657	9.00272e-08	-0.0633232	0.402406	0.493521	2.9634e-12	-0.517187	1.70326e-13	1.8426	1.7678	1.64662	1.99086	0.444692	2.25962	1.98233	1.38247	1.21128	1.98902	1.34363	2.10075	2.05112	1.77054	1.39605	2.30602	0.919775	1.70777	2.25796	1.84211	1.78462	1.4957	1.5843	1.39175	2.47881	1.51022	1.52305
ENSMUSG00000070532	Ccdc190	coiled-coil domain containing 190 [Source:MGI Symbol;Acc:MGI:1925715]	6005	blue	-0.0666388	0.378171	-0.223651	0.00276791	-0.218089	0.00354426	0.0920075	0.223227	-0.0900849	0.23309	0.0312278	0.679888	0.225437	0.00255355	0.338509	4.05674e-06	-0.244626	0.00103265	0.956046	1.40991	1.12072	1.00647	1.24951	0.732418	1.58596	1.07537	0.982586	0.78197	0.860005	0.904297	1.12763	1.1329	0.682904	0.982382	0.462695	0.566072	1.11539	0.865601	0.957917	1.10934	1.0121	1.30049	0.977994	0.258139	0.761466
ENSMUSG00000026659	Dusp12	dual specificity phosphatase 12 [Source:MGI Symbol;Acc:MGI:1890614]	12042	blue	0.0309312	0.682764	-0.032368	0.668878	-0.256486	0.000568991	0.169405	0.0241872	-0.0776337	0.304382	0.0616283	0.415143	0.234217	0.00170257	0.391139	7.32903e-08	-0.31074	2.55909e-05	1.21916	1.05705	1.0884	0.862052	1.04867	1.05917	1.12801	1.38626	1.21478	0.923686	1.15012	1.12007	1.2651	1.18574	0.994138	1.33869	0.910673	1.03862	1.29531	1.01785	1.3774	1.19072	0.745107	1.27281	1.16574	1.46401	1.13002
ENSMUSG00000058076	Sdhc	succinate dehydrogenase complex, subunit C, integral membrane protein [Source:MGI Symbol;Acc:MGI:1913302]	23438	blue	0.000451271	0.995244	0.0387885	0.608243	-0.565152	2.51623e-16	0.0600329	0.427345	-0.399096	3.74718e-08	0.866225	1.28366e-54	-0.188993	0.0117582	0.816127	1.53988e-43	-0.850265	1.18339e-50	2.44768	1.54941	1.72894	2.35158	1.27012	1.79464	2.37844	1.80229	1.44079	2.33782	1.275	1.74194	2.38197	1.26139	1.92288	2.65202	1.66155	1.61737	2.55927	1.66743	1.69854	2.46316	1.14782	1.93452	2.29403	1.2962	1.76209
ENSMUSG00000006403	Adamts4	a disintegrin-like and metallopeptidase (reprolysin type) with thrombospondin type 1 motif, 4 [Source:MGI Symbol;Acc:MGI:1339949]	10216	blue	0.00407079	0.957115	-0.0204967	0.786555	-0.296743	6.05495e-05	0.444753	5.5814e-10	0.0631622	0.403606	0.279307	0.000166672	-0.0752423	0.319565	0.646121	2.69977e-22	-0.613711	1.06519e-19	1.50678	1.08676	1.43267	1.62096	1.33888	1.03933	1.71374	1.2027	0.988037	1.2476	1.03843	1.15681	1.03197	0.585814	1.64848	1.48673	1.17597	1.05189	1.4854	1.2926	1.44224	1.3288	0.676004	1.30283	1.60205	1.02612	1.5201
ENSMUSG00000053483	Usp21	ubiquitin specific peptidase 21 [Source:MGI Symbol;Acc:MGI:1353665]	6045	blue	-0.0213775	0.777617	-0.0239226	0.751957	-0.278982	0.000169738	0.00104161	0.989022	-0.21656	0.00378955	0.348868	1.94676e-06	0.0472099	0.532638	0.387997	9.50596e-08	-0.368041	4.66003e-07	1.43931	1.33319	1.33673	1.70274	0.685462	1.42736	1.31708	1.18216	0.759184	1.80798	0.855712	1.02789	1.74601	1.33553	1.13929	1.74586	1.32334	1.39113	1.37483	0.493985	1.47452	1.47954	1.23071	1.07824	1.54923	1.55895	1.2517
ENSMUSG00000103983	Gm20045	predicted gene, 20045 [Source:MGI Symbol;Acc:MGI:5012230]	5576	blue	0.0894574	0.236375	0.138432	0.0661323	-0.481288	1.1929e-11	0.634742	2.38752e-21	0.227629	0.00231098	0.20377	0.00652076	0.0771629	0.307333	0.609915	2.05185e-19	-0.641344	6.81608e-22	1.2325	0.49759	0.47426	1.23773	0.730639	0.492657	1.14588	0.243004	0.20183	0.827682	0.61037	0.728648	1.28432	0.632841	0.803291	0.807822	0.346497	0.271404	1.06987	0.669237	0.491603	0.759169	0.935513	0.353961	0.804014	0.276211	0.513822
ENSMUSG00000013973	Dedd	death effector domain-containing [Source:MGI Symbol;Acc:MGI:1333874]	13186	blue	-0.153113	0.0418889	-0.0104852	0.889836	-0.442349	7.07693e-10	-0.0206895	0.784595	-0.320007	1.41201e-05	0.488086	5.53933e-12	0.0368142	0.62663	0.493413	3.0007e-12	-0.494243	2.72485e-12	1.47698	1.36034	0.960778	1.44526	1.30092	1.14069	1.09741	1.26087	0.817185	1.44371	0.974574	1.41532	1.80566	0.890444	1.0172	1.26095	1.35036	1.43658	1.5157	1.32052	1.19388	1.55227	1.1602	1.22197	1.46805	1.47747	1.29121
ENSMUSG00000026556	Vangl2	VANGL planar cell polarity 2 [Source:MGI Symbol;Acc:MGI:2135272]	27484	blue	0.0005568	0.994131	0.0437846	0.562814	-0.498609	1.63335e-12	0.400242	3.3973e-08	-0.0471568	0.533099	0.357438	1.03938e-06	0.0419487	0.579318	0.761728	8.12366e-35	-0.769257	7.0387e-36	0.692547	0.55924	0.807474	1.18117	0.70967	0.76717	0.885597	0.818033	0.686415	1.36289	0.834752	0.832541	1.11443	0.674266	0.74866	1.24518	0.580808	0.794831	1.18548	0.442802	0.800199	0.837372	0.704419	0.777856	1.25841	0.598099	0.760764
ENSMUSG00000003464	Pex19	peroxisomal biogenesis factor 19 [Source:MGI Symbol;Acc:MGI:1334458]	9738	blue	0.0223946	0.767331	0.0118683	0.875415	-0.572799	8.05676e-17	-0.0616456	0.415012	-0.483416	9.40003e-12	0.774359	1.27194e-36	-0.0434936	0.565415	0.730436	8.62185e-31	-0.730658	8.11187e-31	2.70192	2.64774	2.43335	2.75602	2.33878	2.4559	2.90335	2.55696	2.12208	2.66085	1.93152	2.63546	3.03843	2.01712	2.3968	2.71964	2.4615	2.52123	3.01856	2.26368	2.52753	2.95254	2.51168	2.3163	3.16103	2.00742	2.53033
ENSMUSG00000026554	Dcaf8	DDB1 and CUL4 associated factor 8 [Source:MGI Symbol;Acc:MGI:91860]	48921	blue	-0.0113056	0.881277	-0.0924094	0.221203	-0.501958	1.09768e-12	0.0768909	0.309046	-0.275776	0.000202983	0.264479	0.000374703	0.197114	0.00854604	0.586814	9.23626e-18	-0.506727	6.18501e-13	1.8845	1.68794	1.69116	1.99564	1.71081	1.63734	1.80884	1.70411	1.76387	1.73043	1.90352	1.67989	1.91214	1.89513	1.82256	2.05249	1.83519	1.76322	1.95003	1.73889	1.66675	1.88116	1.91333	1.84331	1.86224	1.77785	1.61366
ENSMUSG00000007097	Atp1a2	ATPase, Na+/K+ transporting, alpha 2 polypeptide [Source:MGI Symbol;Acc:MGI:88106]	26355	blue	-0.0803191	0.287907	-0.0143162	0.849995	-0.381683	1.59023e-07	0.298774	5.35831e-05	-0.115076	0.127206	0.677145	4.30887e-25	-0.259604	0.000484187	0.778628	2.93526e-37	-0.7833	5.67635e-38	4.97983	4.37107	4.6688	5.1746	4.23967	4.6254	5.06496	4.51304	4.1517	4.9599	4.20606	4.77684	4.79863	4.08074	4.66532	5.15326	4.18146	4.44922	5.12881	4.34959	4.79035	4.90457	4.17535	4.70713	4.99984	4.15991	4.55696
ENSMUSG00000044708	Kcnj10	potassium inwardly-rectifying channel, subfamily J, member 10 [Source:MGI Symbol;Acc:MGI:1194504]	32875	blue	0.0236695	0.754497	-0.00447775	0.952832	-0.586213	1.01574e-17	0.254342	0.000635063	-0.221017	0.00311407	0.603941	5.65723e-19	-0.0637255	0.399417	0.786225	1.98765e-38	-0.804337	2.03184e-41	1.66669	1.54071	1.51848	1.76381	1.34356	1.19816	1.72617	1.23484	1.06705	1.50584	0.920876	1.2249	1.51949	0.974559	1.28541	1.77349	1.20931	1.36726	1.40674	1.17081	1.66412	1.60587	0.851896	1.17484	1.57228	1.12503	1.455
ENSMUSG00000050229	Pigm	phosphatidylinositol glycan anchor biosynthesis, class M [Source:MGI Symbol;Acc:MGI:1914806]	7553	blue	0.0710974	0.347023	0.0212388	0.779022	-0.395105	5.25773e-08	0.216789	0.0037518	-0.145732	0.0529362	0.633845	2.82401e-21	-0.200225	0.00753876	0.640587	7.88277e-22	-0.682006	1.46149e-25	1.69688	1.2126	0.896847	1.72522	0.572194	0.983022	1.31745	0.962028	0.735624	1.36348	0.720716	1.07641	1.04257	0.624792	1.24801	1.28728	1.00149	1.10167	1.67929	0.817658	0.925394	1.70022	0.85475	1.36391	1.40713	1.06381	1.17848
ENSMUSG00000037872	Ackr1	atypical chemokine receptor 1 (Duffy blood group) [Source:MGI Symbol;Acc:MGI:1097689]	1864	blue	-0.00640202	0.932603	-0.0219045	0.772283	-0.638653	1.14032e-21	-0.204804	0.00624788	-0.589783	5.75957e-18	0.689002	2.97033e-26	0.0521714	0.490416	0.600666	9.77655e-19	-0.603731	5.86053e-19	4.50477	4.55993	3.72518	4.35777	4.06864	3.71985	4.72225	3.76788	3.18353	4.96032	3.06212	4.1577	4.29355	3.02459	4.02886	4.68358	4.20631	3.77536	4.1628	3.78668	3.98896	4.69261	2.80854	3.45703	4.27037	3.10007	3.44871
ENSMUSG00000078184	Rbm8a2	RNA binding motif protein 8A2 [Source:MGI Symbol;Acc:MGI:3612447]	1337	blue	0.00415238	0.956256	0.134124	0.0751076	-0.581296	2.19391e-17	0.287059	0.000107124	-0.155376	0.0389179	0.374376	2.84574e-07	0.182251	0.0151874	0.699721	2.36499e-27	-0.684502	8.32033e-26	1.93152	0	0.491389	0.647516	0	0.886569	1.42547	0.819752	0.701533	0.854286	0	0.476625	1.58296	0	0.473445	0.701374	0	0.517641	1.20779	0	0.509256	1.45043	0	0	1.51934	0	0.920015
ENSMUSG00000104157	Gm38101	predicted gene, 38101 [Source:MGI Symbol;Acc:MGI:5611329]	3556	blue	-0.0473877	0.531094	0.02423	0.748875	-0.497549	1.85066e-12	0.0955731	0.205726	-0.212501	0.00451672	0.12749	0.0908296	0.31909	1.49892e-05	0.45945	1.2546e-10	-0.420036	5.88199e-09	1.04141	0	0.204859	1.04608	0	0	0.708334	0	0	0	0.632775	0.198107	0.585223	0.655898	0	0.770751	0.888585	0.216957	0	0	0.398701	0	0	0	0.952896	0.412375	0
ENSMUSG00000104154	Gm38104	predicted gene, 38104 [Source:MGI Symbol;Acc:MGI:5611332]	1894	blue	0.189213	0.0116587	0.137014	0.0689839	-0.358937	9.29545e-07	0.678112	3.48099e-25	0.283418	0.000132056	0.391713	6.98711e-08	-0.201072	0.00728328	0.683706	9.9649e-26	-0.7148	5.52854e-29	3.94529	1.77611	1.71882	3.10395	0.978642	1.32072	3.7332	0.856104	1.46898	2.97148	0.601056	1.41041	3.08985	1.05706	1.40335	2.43813	1.37764	2.47773	3.65053	1.66543	1.88339	3.25745	1.38515	1.06455	3.15478	1.51786	1.93884
ENSMUSG00000063659	Zbtb18	zinc finger and BTB domain containing 18 [Source:MGI Symbol;Acc:MGI:1353609]	8413	blue	0.0424049	0.575197	-0.1153	0.126464	-0.270074	0.00027751	0.451693	2.78292e-10	0.111951	0.137936	-0.0183776	0.808171	0.187393	0.0125038	0.586492	9.72006e-18	-0.470254	3.9992e-11	5.16546	4.65032	5.02108	5.00667	4.95122	5.01921	5.30684	5.01389	5.07649	5.23228	5.47624	5.1408	5.32621	5.18583	5.06475	5.12216	4.69598	4.89434	5.26952	4.93702	4.25524	5.27534	5.24394	5.05803	5.56606	5.20174	5.20991
ENSMUSG00000026500	Cox20	cytochrome c oxidase assembly protein 20 [Source:MGI Symbol;Acc:MGI:1913609]	3563	blue	0.15263	0.0425476	-0.0166369	0.826038	-0.374704	2.77335e-07	0.574868	5.88983e-17	0.270872	0.000265734	-0.0809779	0.283959	0.308096	3.02133e-05	0.485934	7.07485e-12	-0.421678	5.05904e-09	3.46381	3.38588	3.0547	3.61659	3.28853	3.18931	3.5809	3.36888	3.59031	3.37817	3.58367	2.98266	3.61282	3.03224	3.28469	3.87042	3.27937	3.13325	4.04288	3.28912	3.16066	3.64246	3.21463	3.4024	3.7414	3.15792	3.14846
ENSMUSG00000104388	Gm37033	predicted gene, 37033 [Source:MGI Symbol;Acc:MGI:5610261]	7349	blue	-0.00974953	0.897521	0.0623408	0.40976	-0.477768	1.76296e-11	0.466364	6.06402e-11	0.0407139	0.590543	0.254411	0.000632836	0.145098	0.0539878	0.695881	5.93104e-27	-0.708367	2.8265e-28	0.923029	0.142954	0.102761	0.388655	0	0.107298	0.140446	0.0970678	0	1.21585	0.180399	0.192125	1.3637	0.188095	0.0985075	0.934463	0.141417	0.109057	0.965836	0.291506	0.107037	0.880259	0.352716	0.18986	1.01348	0.214252	0.314359
ENSMUSG00000060743	H3f3a	H3.3 histone A [Source:MGI Symbol;Acc:MGI:1097686]	13111	blue	-0.0512103	0.498453	0.0405154	0.592357	-0.51412	2.49736e-13	0.140729	0.061717	-0.277832	0.000181035	0.654748	4.85841e-23	-0.0210448	0.780989	0.729578	1.09157e-30	-0.751842	1.76323e-33	1.10304	0.159335	0.696636	0.900327	0.356624	0.865732	1.02261	0.699705	0.399774	0.800281	0.457647	0.814357	1.39408	0.39202	0.93434	1.63542	0.429066	0.526207	1.3041	0.461037	0.757608	1.37318	0.302015	0.6702	0.917082	0.703265	0.585316
ENSMUSG00000050625	Ccdc121rt1	coiled-coil domain containing 121, retrogene 1 [Source:MGI Symbol;Acc:MGI:2685601]	1818	blue	0.0738854	0.328394	-0.00898095	0.905561	-0.146604	0.0515166	0.172827	0.021428	-0.024511	0.746062	0.400181	3.41494e-08	-0.256265	0.000575517	0.404588	2.33403e-08	-0.444684	5.61951e-10	0	0	0.376772	1.62432	0.590331	0.391882	0.869181	0.644017	0	0	0	0.365029	0	0	1.09937	0.546377	0	0.397713	0.567199	0.538614	0	0.887219	0.641352	0.360965	1.24656	0	0
ENSMUSG00000026511	Srp9	signal recognition particle 9 [Source:MGI Symbol;Acc:MGI:1350930]	7670	blue	-0.0887818	0.239948	-0.0881222	0.243471	-0.314098	2.06782e-05	0.0437799	0.562856	-0.231328	0.00194869	0.458906	1.32757e-10	0.0364305	0.630231	0.482001	1.10163e-11	-0.474086	2.64011e-11	2.18809	1.92392	1.88284	2.3638	1.76417	2.01188	2.32672	1.87475	1.33815	2.3054	1.92892	2.02534	2.52475	1.70855	2.13271	1.94013	1.98562	1.59998	1.81212	1.70165	1.95525	2.17765	1.92083	2.12736	2.08875	1.50631	1.73669
ENSMUSG00000056050	Mia3	MIA SH3 domain ER export factor 3 [Source:MGI Symbol;Acc:MGI:2443183]	43212	blue	0.0992966	0.188528	0.0455787	0.546906	-0.133623	0.0762118	-0.0334067	0.658908	-0.209657	0.00509853	0.403568	2.55017e-08	-0.302012	4.40096e-05	0.295077	6.68923e-05	-0.292794	7.65997e-05	2.03262	2.178	2.18291	2.17724	2.27166	2.24557	2.36623	2.23049	2.05599	2.11251	2.10678	2.34195	2.15644	2.07757	2.3225	2.30788	2.24738	2.34665	2.2659	2.17713	2.22664	2.3229	2.2463	2.33074	2.3176	2.08412	2.29855
ENSMUSG00000026617	Bpnt1	3'(2'), 5'-bisphosphate nucleotidase 1 [Source:MGI Symbol;Acc:MGI:1338800]	25628	blue	-0.0445553	0.555953	0.029903	0.692767	-0.401016	3.17871e-08	-0.0204781	0.786744	-0.242579	0.00114124	0.508601	4.92526e-13	0.00670332	0.929439	0.420138	5.82735e-09	-0.464478	7.40598e-11	2.01679	1.22905	1.28663	1.61761	1.10279	1.21934	1.69077	1.17461	1.05528	2.08584	1.20078	1.25629	1.9819	1.05533	1.3333	2.05939	1.23787	1.3269	2.01466	1.30849	1.04267	1.74438	1.30409	1.32912	1.24082	1.52723	1.32919
ENSMUSG00000097261	4930532G15Rik	RIKEN cDNA 4930532G15 gene [Source:MGI Symbol;Acc:MGI:1922432]	3404	blue	-0.145679	0.0530223	0.0419212	0.579567	-0.444368	5.79842e-10	0.268904	0.000295652	-0.088911	0.239261	0.297802	5.68194e-05	0.112991	0.13429	0.59025	5.34444e-18	-0.612027	1.42638e-19	1.41047	0.292643	0.213362	0	0	0.415083	0.287757	0	0	0.397592	0	0.386843	0.334917	0	0	0.797171	0	0	1.19294	0.312329	0	0.294992	0	0.203928	0.983706	0	0.232911
ENSMUSG00000104394	Gm37254	predicted gene, 37254 [Source:MGI Symbol;Acc:MGI:5610482]	3900	blue	0.104905	0.164646	0.0162738	0.829776	-0.290679	8.67579e-05	0.54376	5.2346e-15	0.202285	0.00693119	0.137955	0.0670804	0.0124258	0.869614	0.529117	3.70343e-14	-0.51215	3.18673e-13	1.42683	0.667978	0.980984	0.256041	0.557158	0.661708	0.973307	0.47865	0	1.07574	0.323072	0.852202	1.37657	0.336184	0.950178	0.894134	0.661931	1.02557	0.924542	1.18003	0.787104	1.66824	0.334509	0.844083	1.43639	0.681117	1.04994
ENSMUSG00000103669	2900042K21Rik	RIKEN cDNA 2900042K21 gene [Source:MGI Symbol;Acc:MGI:1920203]	652	blue	0.0125163	0.868672	0.0646044	0.392934	-0.437872	1.09591e-09	0.448496	3.84209e-10	0.101543	0.178672	0.139357	0.0643243	0.202813	0.00678259	0.577832	3.74542e-17	-0.587525	8.25197e-18	3.03817	0	0	0	0	0	1.10598	0	0	1.40959	0	0	2.96739	0	0	1.83495	0	0	1.88205	0	0.901538	2.18697	0	0	3.1136	0	0
ENSMUSG00000109865	Hspa14	heat shock protein 14 [Source:MGI Symbol;Acc:MGI:1354164]	23964	blue	-0.0362193	0.632217	0.0451673	0.550535	-0.73629	1.68346e-31	0.140445	0.0622504	-0.407242	1.85099e-08	0.722871	6.68876e-30	0.0735061	0.33089	0.890827	7.44081e-62	-0.902292	7.57779e-66	1.69496	0.992952	1.12254	1.59583	0.912414	0.961324	1.75831	1.09166	0.734514	1.46353	0.725575	0.971616	1.67352	1.01788	1.17435	1.38224	1.11675	1.17133	1.94488	0.839706	1.06102	1.78629	0.853507	1.09966	1.48807	1.0567	1.01462
ENSMUSG00000026664	Phyh	phytanoyl-CoA hydroxylase [Source:MGI Symbol;Acc:MGI:891978]	19711	blue	-0.0169554	0.822762	-0.0138641	0.854679	-0.597156	1.74497e-18	-0.00400723	0.957784	-0.330861	6.86073e-06	0.177901	0.0178374	0.438398	1.04136e-09	0.491482	3.75206e-12	-0.411767	1.24077e-08	2.25415	2.27643	1.90787	2.43795	2.12351	2.14586	2.27805	2.13726	2.12291	2.41387	2.25527	2.1108	2.3266	2.17971	2.04798	2.43733	2.012	2.03678	2.52439	2.32402	2.14304	2.17832	2.402	1.92812	2.53885	2.17691	2.23
ENSMUSG00000025781	Atp5c1	ATP synthase, H+ transporting, mitochondrial F1 complex, gamma polypeptide 1 [Source:MGI Symbol;Acc:MGI:1261437]	24494	blue	-0.124377	0.0990627	-0.089575	0.235757	-0.628159	8.08669e-21	-0.211779	0.00465846	-0.581909	1.99473e-17	0.559307	5.89339e-16	0.275862	0.000202019	0.596209	2.03773e-18	-0.56023	5.15793e-16	1.9985	2.13964	2.08954	2.42218	1.85871	2.19138	2.4779	2.04692	2.09813	2.2474	2.08306	2.0047	2.30983	1.86087	2.17617	2.50632	2.25392	2.00562	2.30228	2.11288	2.16643	2.31405	1.88779	1.77675	2.091	1.95686	2.22547
ENSMUSG00000037197	Rbm17	RNA binding motif protein 17 [Source:MGI Symbol;Acc:MGI:1924188]	18716	blue	-0.0856628	0.256929	0.0349971	0.643759	-0.460412	1.13509e-10	0.118707	0.115564	-0.221294	0.0030758	0.564074	2.94787e-16	-0.0570639	0.450596	0.585606	1.11781e-17	-0.621683	2.61104e-20	2.05891	1.56717	1.59894	1.98333	1.46885	1.47958	1.88358	1.72052	1.63347	2.17644	1.50108	1.76769	2.11329	1.54292	1.66188	2.24997	1.72466	1.54183	2.2599	1.6772	1.49283	2.00441	1.33487	1.74296	1.58504	1.6782	1.57321
ENSMUSG00000102630	Gm37289	predicted gene, 37289 [Source:MGI Symbol;Acc:MGI:5610517]	1401	blue	-0.0114894	0.879362	0.1185	0.116204	-0.515957	1.98664e-13	0.460903	1.07828e-10	0.036195	0.632445	0.300002	4.97423e-05	0.12514	0.096991	0.710113	1.82279e-28	-0.722039	8.34377e-30	2.1235	0.628908	0	0.623484	0	0.49057	1.05149	0	0.675929	2.02993	0	0.457963	1.82357	1.29923	0	0	0	0	2.97729	0	0.48952	2.10684	0.787774	0.453018	3.54696	0	0.511661
ENSMUSG00000026728	Vim	vimentin [Source:MGI Symbol;Acc:MGI:98932]	8899	blue	0.0556431	0.461969	-0.0276152	0.715214	-0.657471	2.79429e-23	0.351003	1.66791e-06	-0.178953	0.0171619	0.522317	8.90225e-14	0.0885064	0.241415	0.884474	7.87292e-60	-0.862476	1.21402e-53	3.70616	3.04014	2.18146	3.45385	1.56681	2.15156	3.72719	2.39318	1.66174	3.45322	1.40597	2.02095	3.83731	1.91076	1.97006	3.57421	1.5216	1.02683	3.73331	1.95092	2.12789	3.42221	1.86009	2.61136	3.19106	2.10615	2.09892
ENSMUSG00000102553	D930036K23Rik	RIKEN cDNA D930036K23 gene [Source:MGI Symbol;Acc:MGI:2442341]	3963	blue	0.106402	0.158671	0.0117338	0.876816	-0.511253	3.55913e-13	0.557122	8.06637e-16	0.10004	0.185225	0.337162	4.45459e-06	0.034631	0.647234	0.748795	4.42261e-33	-0.750806	2.41391e-33	2.33216	0.825904	0.969624	1.54156	0	0.515538	1.7928	0.827306	0.276523	1.06364	0	0.841935	1.23062	0.827594	0.478325	0.708086	0.252151	1.1143	1.34861	0.272162	0.777427	1.7392	0.329755	1.12017	1.63186	0.375061	1.03804
ENSMUSG00000086657	Stamos	signal transducing adaptor molecule (SH3 domain and ITAM motif) 1, opposite strand [Source:MGI Symbol;Acc:MGI:1918207]	4511	blue	-0.0234547	0.756656	0.00632179	0.933445	-0.547863	2.97396e-15	0.339756	3.71887e-06	-0.100768	0.18203	0.327142	8.81331e-06	0.178786	0.0172677	0.721153	1.05492e-29	-0.725545	3.26771e-30	1.03051	0.421578	0.310975	1.22845	0	0.170928	0.999586	0.29486	0	1.28489	0.723329	0.301074	1.12637	0	0	1.07951	0	0.468606	1.35212	0.241712	0.323001	0.752585	0.537254	0.544272	1.41127	0	0
ENSMUSG00000026743	Mllt10	myeloid/lymphoid or mixed-lineage leukemia; translocated to, 10 [Source:MGI Symbol;Acc:MGI:1329038]	157151	blue	-0.0444598	0.556802	-0.0902136	0.23242	-0.734409	2.85928e-31	0.404123	2.43033e-08	-0.141865	0.0596259	0.270487	0.000271357	0.414327	9.86845e-09	0.887001	1.27441e-60	-0.819441	3.66334e-44	1.21599	0.60059	0.694197	1.21743	0.621152	0.540952	1.22281	0.579862	0.631119	1.17929	0.752896	0.555445	1.26864	0.677286	0.618561	1.2246	0.640316	0.552229	1.26551	0.651392	0.61298	1.21228	0.813675	0.572147	1.32082	0.557466	0.603994
ENSMUSG00000082520	Gm13349	predicted gene 13349 [Source:MGI Symbol;Acc:MGI:3649966]	410	blue	0.0876869	0.245817	0.0930254	0.218126	-0.376127	2.47866e-07	0.559293	5.90513e-16	0.232119	0.00187823	0.108977	0.148775	0.134096	0.0751692	0.564191	2.89741e-16	-0.571547	9.72685e-17	2.97887	1.51958	0	3.06849	0	1.25333	2.70001	0	0	1.86173	1.76021	0	4.0167	3.08549	0	3.72784	0	0	3.2544	0	1.25122	2.73356	0	1.81604	3.18839	0	1.2955
ENSMUSG00000026781	Acbd5	acyl-Coenzyme A binding domain containing 5 [Source:MGI Symbol;Acc:MGI:1921409]	47391	blue	-0.0144766	0.848334	-0.0027817	0.970688	-0.449517	3.46708e-10	0.416731	7.94553e-09	-0.00670961	0.929373	0.453595	2.29336e-10	-0.103593	0.17002	0.719786	1.51251e-29	-0.741531	3.75783e-32	1.8322	1.37803	1.42995	1.91867	1.45711	1.42663	1.80294	1.5624	1.55749	1.59858	1.74618	1.69199	1.79805	1.50364	1.59801	1.81791	1.52833	1.60099	1.71045	1.41506	1.50547	1.818	1.26053	1.61921	1.76759	1.39977	1.54865
ENSMUSG00000081648	Gm13423	predicted gene 13423 [Source:MGI Symbol;Acc:MGI:3650165]	1650	blue	-0.0117017	0.87715	-0.0821213	0.277192	-0.15423	0.0403991	0.377442	2.23304e-07	0.15868	0.0348995	0.0090561	0.904774	0.065221	0.388424	0.359228	9.09551e-07	-0.33682	4.56139e-06	1.43855	0	0.990198	0	1.41749	0.755113	1.24256	0.948561	0.592099	1.85538	1.12863	0.964705	0.622068	0.696215	0	0	0.544685	0.765087	0.614177	1.3196	0.753629	1.26554	1.15935	1.67474	1.81593	1.27868	0.445144
ENSMUSG00000048707	Tprn	taperin [Source:MGI Symbol;Acc:MGI:2139535]	7267	blue	0.0145024	0.848068	0.0163538	0.828952	-0.754433	7.98303e-34	0.201853	0.00705485	-0.345624	2.45692e-06	0.661627	1.1883e-23	0.109877	0.145429	0.899311	9.19542e-65	-0.901856	1.09707e-65	2.36251	1.03801	1.13393	2.53459	0.814682	1.16946	2.17491	0.989399	1.10578	2.76483	0.344148	0.720923	2.67482	0.769051	1.05098	2.26334	1.02963	0.905735	2.93115	1.167	1.31021	2.60908	0.76572	1.35876	2.22131	0.720397	0.654876
ENSMUSG00000026944	Abca2	ATP-binding cassette, sub-family A (ABC1), member 2 [Source:MGI Symbol;Acc:MGI:99606]	19837	blue	0.0228199	0.763043	-0.070057	0.354143	-0.608143	2.77816e-19	0.348604	1.98416e-06	-0.0884378	0.241781	0.185901	0.0132357	0.32967	7.43623e-06	0.694978	7.34685e-27	-0.63131	4.52611e-21	2.52168	1.84217	2.01289	2.32448	2.10093	1.90532	2.32629	2.08704	2.04382	2.45018	2.07295	1.81009	2.71372	1.95943	1.85516	2.53861	1.97741	1.92322	2.401	2.01001	2.04908	2.48387	1.99116	2.116	2.36504	1.85191	2.01312
ENSMUSG00000047617	Paxx	non-homologous end joining factor [Source:MGI Symbol;Acc:MGI:2442831]	5953	blue	0.0457236	0.545631	0.119201	0.114046	-0.575754	5.14702e-17	0.214588	0.00412852	-0.139932	0.0632202	0.11174	0.138684	0.414415	9.79158e-09	0.538193	1.11369e-14	-0.475328	2.3053e-11	2.05681	1.48556	1.06603	2.01913	1.43213	1.16291	1.65342	1.76796	1.34887	2.09286	1.72337	1.46388	2.14945	1.97179	1.45666	1.87638	1.40752	1.35106	1.80758	1.41064	1.27864	1.73776	1.52632	1.25646	1.97621	1.47447	1.38014
ENSMUSG00000015090	Ptgds	prostaglandin D2 synthase (brain) [Source:MGI Symbol;Acc:MGI:99261]	3337	blue	-0.0413563	0.584691	-0.0150096	0.842821	-0.301728	4.4782e-05	0.43883	9.98518e-10	0.142218	0.0589862	0.124174	0.0996186	0.0874763	0.246957	0.548362	2.77461e-15	-0.519848	1.21807e-13	7.37437	5.62652	6.90314	7.88622	6.43736	7.44091	7.5451	6.844	6.76006	7.95588	6.73609	7.40613	7.87508	6.94682	6.75997	7.94289	6.27067	5.96324	8.2168	7.04627	7.53815	7.39512	6.75142	8.22841	7.83355	6.87473	6.91366
ENSMUSG00000036504	Phpt1	phosphohistidine phosphatase 1 [Source:MGI Symbol;Acc:MGI:1922704]	1794	blue	-0.0270102	0.721191	-0.0427814	0.571804	-0.484385	8.42846e-12	0.183644	0.0144146	-0.246562	0.000938721	0.412196	1.19421e-08	0.098045	0.194187	0.732223	5.26154e-31	-0.656741	3.24313e-23	4.79412	4.58747	4.70605	4.93318	5.10027	4.66411	5.19383	4.40886	4.36469	4.8727	4.51257	4.31935	5.13795	3.63334	4.74218	4.76172	4.35097	4.06708	4.74785	4.43552	4.38373	4.49341	4.25949	4.78158	5.1231	4.73217	4.90314
ENSMUSG00000036352	Ubac1	ubiquitin associated domain containing 1 [Source:MGI Symbol;Acc:MGI:1920995]	23204	blue	0.0283048	0.70842	-0.057856	0.444325	-0.594798	2.56488e-18	-0.0340936	0.652348	-0.446346	4.76361e-10	0.584909	1.24758e-17	0.0801163	0.28913	0.705215	6.1868e-28	-0.665086	5.77061e-24	1.12152	1.17224	1.03716	1.44885	0.742792	0.948011	1.19868	0.945442	0.9813	1.34261	1.03888	1.13457	1.52523	1.10214	1.12841	1.59458	0.886009	1.19736	1.19095	1.18683	1.00003	1.15799	0.56798	1.18242	1.42492	0.89686	1.17594
ENSMUSG00000026932	Nacc2	nucleus accumbens associated 2, BEN and BTB (POZ) domain containing [Source:MGI Symbol;Acc:MGI:1915241]	67685	blue	0.0373034	0.622052	-0.0167337	0.825041	-0.70548	5.79463e-28	0.423095	4.43942e-09	-0.117836	0.118277	0.277366	0.000185808	0.288408	9.90599e-05	0.865303	2.24545e-54	-0.807647	5.33897e-42	1.53814	1.08383	1.10721	1.70995	1.24585	1.07489	1.76465	0.936857	0.946925	1.4871	1.14719	0.881984	1.49238	1.17311	1.13548	1.70076	1.10551	0.76478	1.60598	1.0912	1.32007	1.52168	1.21608	1.11655	1.73245	0.861572	1.08341
ENSMUSG00000036186	Dipk1b	divergent protein kinase domain 1B [Source:MGI Symbol;Acc:MGI:1927576]	8040	blue	-0.0885371	0.24125	-0.0719685	0.341133	-0.72958	1.09079e-30	-0.10565	0.161649	-0.605102	4.65334e-19	0.671236	1.56014e-24	0.200756	0.00737775	0.826755	1.38406e-45	-0.78757	1.22032e-38	2.75137	2.26557	2.12898	3.06136	1.66547	2.245	3.11496	2.06378	2.36892	2.97296	1.72825	2.15393	2.73167	1.40859	2.10238	2.95737	2.10258	2.12875	2.6637	1.91191	1.87774	3.1024	1.82032	2.11859	3.38068	1.91858	2.23539
ENSMUSG00000014867	Surf4	surfeit gene 4 [Source:MGI Symbol;Acc:MGI:98445]	13888	blue	0.0169617	0.822697	-0.0832834	0.270427	-0.063985	0.397496	0.105019	0.164184	-0.062805	0.406275	0.240264	0.00127664	-0.143081	0.0574501	0.399508	3.61766e-08	-0.328758	7.9076e-06	2.72735	2.58877	2.48795	2.56269	2.47683	2.46858	2.48514	2.62198	2.38408	2.5415	2.74612	2.3739	2.77152	2.53353	2.49487	2.82523	2.33136	2.36601	2.86887	2.4287	2.51786	2.67673	2.45155	2.47958	2.80528	2.41162	2.473
ENSMUSG00000026790	Odf2	outer dense fiber of sperm tails 2 [Source:MGI Symbol;Acc:MGI:1098824]	42525	blue	0.0814227	0.281314	-0.00268014	0.971757	-0.638566	1.15951e-21	0.542996	5.81075e-15	0.00530266	0.944155	0.249857	0.000796712	0.240828	0.00124242	0.836129	1.64805e-47	-0.775537	8.51315e-37	1.60183	0.953123	0.861192	1.40943	0.794854	0.86968	1.60866	0.803812	0.945144	1.16644	0.888843	0.961807	1.32539	0.881518	0.793043	1.20107	0.805304	0.870086	1.38189	0.842599	0.652872	1.27295	0.719102	0.674031	1.55418	0.914858	0.858715
ENSMUSG00000015337	Endog	endonuclease G [Source:MGI Symbol;Acc:MGI:1261433]	2576	blue	-0.000975192	0.989722	0.0728293	0.335374	-0.402352	2.83324e-08	0.12779	0.0900658	-0.143255	0.0571454	0.349558	1.85205e-06	0.136891	0.0692354	0.446199	4.83408e-10	-0.448826	3.71688e-10	2.61185	1.98974	2.38194	2.71944	2.19162	2.60077	3.32805	2.19344	2.38553	2.48859	2.14403	2.60401	3.21523	1.75861	2.3878	2.77586	2.35427	1.79251	3.02472	2.3652	2.24339	2.80654	2.4184	2.38219	2.37801	2.21848	1.91771
ENSMUSG00000007476	Lrrc8a	leucine rich repeat containing 8A VRAC subunit A [Source:MGI Symbol;Acc:MGI:2652847]	26075	blue	-0.0146559	0.846479	-0.0615463	0.415765	-0.699764	2.34037e-27	0.185539	0.0134187	-0.358211	9.8128e-07	0.577711	3.81577e-17	0.11483	0.128027	0.899807	6.1027e-65	-0.859449	7.09898e-53	1.52413	1.10094	0.823645	1.842	0.911709	0.952857	1.60692	1.12229	0.824274	1.71294	0.95495	0.973446	1.55798	0.803827	1.17295	1.7413	0.969281	1.02868	1.78719	1.00701	1.17564	1.77766	0.832358	1.23132	1.73507	0.784063	0.971319
ENSMUSG00000075419	Dolk	dolichol kinase [Source:MGI Symbol;Acc:MGI:2677836]	2103	blue	-0.085412	0.25833	0.0703643	0.352031	-0.315939	1.83765e-05	-0.0224712	0.766558	-0.29544	6.54598e-05	0.57683	4.3673e-17	-0.126727	0.0927961	0.498814	1.59427e-12	-0.520975	1.05601e-13	2.45245	2.21413	1.94031	2.75749	1.85696	2.17233	2.89363	2.8238	2.19635	3.20441	2.23992	2.38712	2.95742	0.9806	2.23393	2.88133	2.75666	2.19131	3.34485	2.1767	2.33254	2.85658	1.96479	2.56442	2.41988	2.72133	2.31333
ENSMUSG00000039515	Ptpa	protein phosphatase 2 protein activator [Source:MGI Symbol;Acc:MGI:1346006]	31767	blue	0.0246839	0.744333	-0.0391209	0.60517	-0.543745	5.24565e-15	-0.166498	0.0267667	-0.46737	5.44779e-11	0.296385	6.18636e-05	0.335351	5.04815e-06	0.50828	5.12136e-13	-0.452439	2.57972e-10	1.93108	1.88709	1.70996	2.23125	1.89525	1.84395	2.13174	1.92045	1.74233	2.08069	2.24138	1.72541	2.03844	1.97514	1.89287	2.16288	1.84678	1.91813	2.0408	1.59467	2.01671	2.11458	1.93327	1.87507	2.26217	1.95939	1.97407
ENSMUSG00000002550	Uck1	uridine-cytidine kinase 1 [Source:MGI Symbol;Acc:MGI:98904]	5157	blue	-0.056408	0.455827	-0.0807649	0.285232	-0.510065	4.11823e-13	0.166862	0.0264318	-0.226106	0.00247712	0.378353	2.07692e-07	0.186367	0.0130031	0.667815	3.24246e-24	-0.604318	5.31012e-19	2.15901	1.31289	1.24348	1.97719	1.65023	1.72707	1.96868	1.83943	1.20091	1.62969	1.09686	1.14923	2.20854	1.13139	1.32799	2.24279	1.97646	1.59177	2.24351	1.18674	1.6758	2.3344	1.12701	1.20342	2.33136	1.49837	1.56852
ENSMUSG00000079442	St6galnac4	ST6 (alpha-N-acetyl-neuraminyl-2,3-beta-galactosyl-1,3)-N-acetylgalactosaminide alpha-2,6-sialyltransferase 4 [Source:MGI Symbol;Acc:MGI:1341894]	12603	blue	0.171344	0.0225886	-0.0266143	0.725113	-0.682025	1.45527e-25	0.353933	1.34651e-06	-0.125446	0.0961725	0.179135	0.0170478	0.371928	3.44749e-07	0.746097	9.87367e-33	-0.668066	3.07365e-24	1.85305	1.36694	1.37453	1.71527	1.42086	1.38999	2.01459	1.34606	1.33799	1.904	1.66664	1.19375	2.08629	1.56017	1.28819	2.04318	1.25171	1.32826	2.22723	1.49977	1.33735	1.78707	1.34156	1.48768	2.01304	1.37133	1.21723
ENSMUSG00000104277	Gm38299	predicted gene, 38299 [Source:MGI Symbol;Acc:MGI:5611527]	3788	blue	-0.0863529	0.253102	0.102252	0.175646	-0.50761	5.5564e-13	0.214878	0.00407705	-0.0778107	0.303277	0.139984	0.0631222	0.314394	2.02903e-05	0.386542	1.07128e-07	-0.427956	2.82299e-09	0.803281	0.683701	0	0.847801	0.570759	0	0.482051	0	0.528137	0.651024	0.331605	0	0.304296	0.345023	0.185354	0	0	0.204567	0.300017	0.283576	0.200896	0.26769	0	0	0.286421	0	0
ENSMUSG00000107106	Gm43760	predicted gene 43760 [Source:MGI Symbol;Acc:MGI:5663897]	3014	blue	-0.0683717	0.365868	0.0839812	0.266419	-0.297204	5.88999e-05	0.422872	4.53196e-09	0.189153	0.0116857	0.0277231	0.71415	0.127841	0.0899373	0.3078	3.07775e-05	-0.340812	3.4536e-06	0.699788	0.326515	0	0.58743	0.686999	0.461018	0.805633	0.226137	0	0.441872	0.405746	0.231016	0	0	0.427182	0	0	0.252732	0.660875	0	0	1.18978	0	0	0	0	0
ENSMUSG00000009030	Pdcl	phosducin-like [Source:MGI Symbol;Acc:MGI:1914716]	9258	blue	0.0504439	0.504911	0.0165741	0.826684	-0.650764	1.08004e-22	0.0403818	0.593579	-0.398731	3.86587e-08	0.657549	2.75019e-23	0.0513454	0.497319	0.72095	1.11323e-29	-0.735363	2.18708e-31	2.36913	1.65527	1.58136	2.00965	1.52926	1.1543	2.31527	1.52526	1.48993	2.24287	1.58924	1.62847	2.41237	1.21817	1.39327	2.23477	1.64411	1.80457	2.19977	1.72713	1.88357	2.17108	1.46405	1.66775	1.88584	1.26182	1.64424
ENSMUSG00000050714	Zbtb26	zinc finger and BTB domain containing 26 [Source:MGI Symbol;Acc:MGI:2444402]	10967	blue	0.0817031	0.279654	0.0592619	0.433316	-0.361756	7.52312e-07	0.390444	7.76517e-08	0.0171316	0.82095	0.422344	4.75838e-09	-0.135077	0.0730409	0.645204	3.22941e-22	-0.677651	3.85409e-25	0.958731	0.821956	0.841201	0.924302	0.504936	0.742082	0.918915	0.683727	0.384469	0.669867	0.532346	0.778962	0.920033	0.552462	0.889358	0.938002	0.427672	0.796313	1.02712	0.678242	0.740617	0.937688	0.638564	0.689422	1.14643	0.619576	0.816665
ENSMUSG00000026755	Arpc5l	actin related protein 2/3 complex, subunit 5-like [Source:MGI Symbol;Acc:MGI:1921442]	10529	blue	-0.128734	0.0876964	-0.0758487	0.315669	-0.54557	4.08261e-15	-0.260273	0.000467582	-0.594029	2.90605e-18	0.553502	1.34985e-15	0.220479	0.00318927	0.521257	1.01875e-13	-0.478319	1.65895e-11	2.5642	3.02236	2.95426	3.36165	2.99709	2.92116	3.28952	2.84184	2.99961	3.23449	2.87221	2.9927	2.8915	2.87144	3.19968	3.30798	3.00801	3.14363	3.28276	3.11406	3.03615	2.89815	3.02726	3.01229	3.25293	2.61833	2.83136
ENSMUSG00000082879	Gm13525	predicted gene 13525 [Source:MGI Symbol;Acc:MGI:3650225]	477	blue	0.0310585	0.681529	0.0876387	0.246078	-0.44238	7.05542e-10	0.536515	1.39456e-14	0.168537	0.0249343	0.0941843	0.212421	0.242055	0.0011707	0.558582	6.54184e-16	-0.558754	6.38143e-16	1.57156	0	0	1.37171	0	1.13062	2.51748	0	0	2.96221	0	0	2.7212	0	0	1.46194	0	0	1.50371	0	1.12864	1.38905	0	0	1.45628	0	0
ENSMUSG00000036202	Rif1	replication timing regulatory factor 1 [Source:MGI Symbol;Acc:MGI:1098622]	49551	blue	0.029525	0.696458	-0.00156984	0.983455	-0.755409	5.90769e-34	0.437573	1.12808e-09	-0.153942	0.0407792	0.415059	9.24045e-09	0.249782	0.000799724	0.942733	2.27871e-85	-0.89874	1.46878e-64	2.38787	1.17079	1.41376	2.18461	1.36555	1.26811	2.44443	1.37273	1.30454	1.98715	1.38951	1.30967	2.22094	1.03797	1.28441	2.26327	1.15182	1.19704	2.54644	1.27978	1.31978	2.23555	1.22342	1.31098	2.35895	1.24927	1.24616
ENSMUSG00000017412	Cacnb4	calcium channel, voltage-dependent, beta 4 subunit [Source:MGI Symbol;Acc:MGI:103301]	248511	blue	-0.036107	0.633273	0.0324762	0.667836	-0.819193	4.08318e-44	-0.235778	0.00158169	-0.646737	2.39292e-22	0.538101	1.12758e-14	0.388881	8.83786e-08	0.568182	1.60821e-16	-0.567209	1.85759e-16	1.41245	1.42985	1.03725	1.40532	1.30357	0.909996	1.52641	1.04116	1.39543	1.39022	1.25252	1.12537	1.48192	1.28525	1.01718	1.55916	1.46644	1.32999	1.39389	1.38902	1.21611	1.52303	1.16404	0.896077	1.36363	1.20586	1.02286
ENSMUSG00000026977	Marchf7	membrane associated ring-CH-type finger 7 [Source:MGI Symbol;Acc:MGI:1931053]	40789	blue	0.133837	0.0757382	0.0294342	0.697345	-0.287895	0.000102056	0.306732	3.28969e-05	-0.0258024	0.733177	0.538951	1.0057e-14	-0.312673	2.26433e-05	0.570445	1.1476e-16	-0.59892	1.3053e-18	1.93994	1.35484	1.50365	1.59641	1.4397	1.65817	1.85435	1.51391	1.47811	1.79189	1.25816	1.68705	1.47932	1.20458	1.64442	1.74843	1.63938	1.64906	1.75825	1.063	1.25554	1.79923	1.43115	1.5045	1.55459	1.37101	1.48462
ENSMUSG00000075304	Sp5	trans-acting transcription factor 5 [Source:MGI Symbol;Acc:MGI:1927715]	2806	blue	-0.0500341	0.508383	-0.00678663	0.928564	-0.794663	8.76071e-40	0.26205	0.000426002	-0.294145	7.0707e-05	0.503698	8.91323e-13	0.258481	0.000513276	0.899191	1.01475e-64	-0.871805	3.98116e-56	1.88055	0	0	1.98878	0	0	1.98025	0.241569	0.675159	0.823636	0.431728	0	1.68659	0.448607	0.244978	2.28626	0	0	2.85621	0	0.265078	1.79787	0.446454	0	2.27919	0	0.278035
ENSMUSG00000070880	Gad1	glutamate decarboxylase 1 [Source:MGI Symbol;Acc:MGI:95632]	48942	blue	0.039137	0.605022	0.0555289	0.46289	-0.567742	1.71655e-16	0.428216	2.75479e-09	-0.029551	0.696203	0.579613	2.84752e-17	-0.0641826	0.396037	0.790582	4.03751e-39	-0.839145	3.73221e-48	2.8802	1.97838	2.00948	2.61039	1.7512	1.91044	2.86076	2.19678	1.65004	3.08807	1.91842	2.28435	2.973	1.84516	2.11144	2.98045	1.82848	2.03597	3.0216	1.84356	2.0873	2.77368	1.80541	2.04097	2.82824	1.82713	1.97253
ENSMUSG00000018770	Atp5g3	ATP synthase, H+ transporting, mitochondrial F0 complex, subunit C3 (subunit 9) [Source:MGI Symbol;Acc:MGI:2442035]	2879	blue	-0.0655026	0.386374	0.0321665	0.670818	-0.56112	4.53409e-16	0.0308613	0.683442	-0.442161	7.20912e-10	0.897573	3.79896e-64	-0.191182	0.0108019	0.847637	4.80449e-50	-0.869896	1.33057e-55	8.45251	7.22528	7.3823	8.34239	6.9717	7.48355	8.32281	7.64751	6.69571	8.73874	6.42056	7.76506	8.49435	6.40755	7.69848	8.51061	7.21669	7.57301	8.47177	6.88824	7.40827	8.35872	6.30599	7.33047	8.63039	6.60051	7.30209
ENSMUSG00000002731	Prkra	protein kinase, interferon inducible double stranded RNA dependent activator [Source:MGI Symbol;Acc:MGI:1344375]	18117	blue	0.0443607	0.557682	0.0349382	0.644318	-0.537375	1.24301e-14	0.235142	0.00162998	-0.191	0.0108787	0.288101	0.000100846	0.258994	0.000499791	0.678164	3.44115e-25	-0.615384	7.95621e-20	0.990317	0.979528	0.781344	1.37215	0.686004	0.808719	0.871449	1.0711	0.75977	1.05182	0.98006	0.878006	0.913598	0.885445	1.00235	0.873125	0.97148	0.738893	0.745579	0.825423	0.754697	0.922342	0.967133	0.869708	1.24946	0.831333	0.917479
ENSMUSG00000002732	Fkbp7	FK506 binding protein 7 [Source:MGI Symbol;Acc:MGI:1336879]	10072	blue	0.0926788	0.219854	-0.0783678	0.299818	-0.339453	3.79847e-06	0.394253	5.64892e-08	0.118425	0.116438	-0.0199212	0.79241	0.310514	2.59588e-05	0.430035	2.32085e-09	-0.388594	9.04968e-08	0.725812	0.382955	0.854403	0.460457	0.542306	0.35803	0.606178	0.266788	0.414152	0.974642	0.473785	0.391552	0.843832	0.686753	0.330906	0.583643	0.201997	0.486517	0.231278	0.218323	0.419168	1.10444	0.489717	0.442752	0.411833	0.433445	0.616279
ENSMUSG00000002733	Plekha3	pleckstrin homology domain-containing, family A (phosphoinositide binding specific) member 3 [Source:MGI Symbol;Acc:MGI:1932515]	21547	blue	0.0292156	0.699484	0.00710457	0.925227	-0.162296	0.0309094	0.223926	0.00273387	-0.0118135	0.875985	0.524772	6.50077e-14	-0.344867	2.59314e-06	0.497699	1.81841e-12	-0.514997	2.23931e-13	2.03561	1.6138	1.62758	2.29325	1.68628	1.73003	1.94844	1.72357	1.59484	1.78922	1.42271	2.08093	2.01963	1.69258	1.97834	2.09191	1.79028	1.84712	2.18127	1.66747	1.51851	2.12736	1.5307	1.9193	1.94747	1.56843	1.9452
ENSMUSG00000027011	Ube2e3	ubiquitin-conjugating enzyme E2E 3 [Source:MGI Symbol;Acc:MGI:107412]	53169	blue	-0.0947655	0.2096	-0.109483	0.146885	-0.416334	8.23643e-09	-0.0158602	0.834039	-0.38955	8.36209e-08	0.421107	5.33202e-09	0.0646679	0.392468	0.617121	5.86642e-20	-0.540104	8.6077e-15	1.54149	1.87323	1.64741	1.62945	1.57085	1.59819	1.73018	1.57612	1.38197	1.77292	1.4781	1.83567	1.72624	1.59506	1.64132	1.62938	1.48946	1.66479	1.62832	1.46683	1.50126	1.58013	1.50463	1.62757	1.70179	1.23259	1.42962
ENSMUSG00000034701	Neurod1	neurogenic differentiation 1 [Source:MGI Symbol;Acc:MGI:1339708]	4230	blue	0.0128566	0.865135	-0.000693802	0.992687	-0.769784	5.91129e-36	0.283285	0.000133057	-0.307244	3.18649e-05	0.633423	3.0555e-21	0.127372	0.0911333	0.981219	5.25148e-127	-0.96042	4.53853e-99	7.04192	2.46577	3.47674	6.72441	2.35858	2.67028	6.92407	3.54108	2.42078	6.73068	1.826	3.25368	6.98101	3.2057	3.53085	7.15065	2.58735	3.19933	7.26657	2.23135	2.28694	7.03335	2.53899	3.29236	6.76516	2.11698	3.61816
ENSMUSG00000076437	Selenoh	selenoprotein H [Source:MGI Symbol;Acc:MGI:1919907]	1555	blue	-0.0789172	0.296432	-0.00993457	0.895587	-0.685091	7.27898e-26	-0.192277	0.0103498	-0.533845	1.98947e-14	0.218983	0.00340756	0.513741	2.61756e-13	0.473212	2.90388e-11	-0.417266	7.56971e-09	3.57167	3.14999	2.99606	3.48905	3.61247	3.17434	3.81218	3.09848	3.18215	3.51338	2.43469	2.5967	3.56904	3.44256	2.66527	3.68283	3.48816	2.79445	2.95555	2.97794	3.11159	3.51471	2.64056	3.36545	3.949	3.09871	2.48604
ENSMUSG00000050043	Tmx2	thioredoxin-related transmembrane protein 2 [Source:MGI Symbol;Acc:MGI:1914208]	7824	blue	-0.188827	0.0118336	-0.0674477	0.372397	-0.587187	8.70716e-18	-0.0566686	0.453744	-0.458896	1.32901e-10	0.391085	7.36236e-08	0.311031	2.51246e-05	0.687385	4.31011e-26	-0.607068	3.33626e-19	4.22307	4.14019	4.0713	4.27018	3.99277	4.08361	4.20029	4.16966	4.19662	4.42167	4.01243	3.99262	4.39292	3.9801	4.01791	4.45737	3.89076	4.01077	4.26621	4.13877	4.13467	4.21491	3.84776	4.01141	4.58293	4.00344	4.04211
ENSMUSG00000027079	Clp1	CLP1, cleavage and polyadenylation factor I subunit [Source:MGI Symbol;Acc:MGI:2138968]	5246	blue	0.00518372	0.945406	0.0477684	0.527795	-0.329425	7.56009e-06	0.068222	0.366921	-0.252606	0.000693668	0.594466	2.70723e-18	-0.171772	0.0222477	0.521808	9.49885e-14	-0.540836	7.79622e-15	1.88361	1.38135	1.22927	0.900122	0.609413	1.39088	1.71885	1.24182	0.846401	1.5125	0.804362	1.63006	0.59327	0.832149	1.6224	1.18679	1.20067	1.0704	1.41637	0.702534	1.44688	1.61401	0.828616	1.18951	1.37058	0.923822	1.17027
ENSMUSG00000027282	Mtch2	mitochondrial carrier 2 [Source:MGI Symbol;Acc:MGI:1929260]	19655	blue	-0.00212413	0.977615	-0.0433319	0.566863	-0.72553	3.28047e-30	0.36929	4.23194e-07	-0.196008	0.00893187	0.410026	1.4482e-08	0.295129	6.66861e-05	0.922815	2.07996e-74	-0.865155	2.45534e-54	3.04882	2.26807	2.21527	2.76946	2.14204	2.35844	2.99237	2.23118	2.20816	2.72362	2.14938	2.28136	2.9101	2.21562	2.42922	2.96602	2.34533	2.20516	2.92474	2.37466	2.21046	3.08161	2.40533	2.26687	3.20996	2.14148	2.28804
ENSMUSG00000005505	Kbtbd4	kelch repeat and BTB (POZ) domain containing 4 [Source:MGI Symbol;Acc:MGI:1914386]	6886	blue	0.0815559	0.280525	0.0727978	0.335584	-0.428564	2.66604e-09	0.0176792	0.815328	-0.242036	0.00117177	0.280463	0.000156168	0.159725	0.0337031	0.412058	1.20897e-08	-0.390149	7.95773e-08	1.54235	1.28994	1.12556	1.67795	1.52043	1.10675	1.56763	1.51446	1.61685	1.67626	1.64722	1.5362	1.61671	1.62326	0.747387	1.77868	1.06979	1.46459	1.53974	1.41836	1.35707	1.29749	0.915906	1.48611	1.42831	1.609	1.02808
ENSMUSG00000063235	Ptpmt1	protein tyrosine phosphatase, mitochondrial 1 [Source:MGI Symbol;Acc:MGI:1913711]	9329	blue	-0.106392	0.158707	-0.0333309	0.659634	-0.406763	1.93038e-08	0.0268285	0.722991	-0.231118	0.00196776	0.286834	0.000108526	0.251018	0.000751589	0.437964	1.08614e-09	-0.423141	4.42075e-09	2.14688	1.60947	1.90049	1.81423	1.7921	1.70062	2.02173	1.94521	1.73703	2.16137	1.97745	1.69788	2.29548	1.81686	1.61338	2.2535	1.84645	1.82218	1.8214	2.09196	1.80215	2.13558	1.85525	2.01686	1.52236	2.09733	1.77791
ENSMUSG00000002105	Slc39a13	solute carrier family 39 (metal ion transporter), member 13 [Source:MGI Symbol;Acc:MGI:1915677]	8626	blue	0.0617042	0.414567	0.0134673	0.858794	-0.460255	1.15377e-10	0.19666	0.00870238	-0.175288	0.0196148	0.449956	3.31714e-10	-0.0200679	0.790916	0.625684	1.26983e-20	-0.613038	1.19732e-19	1.4568	0.846945	0.862086	1.26592	0.400181	0.941782	1.40875	0.775286	0.905793	0.908054	0.749211	0.839012	1.28903	0.671938	0.973253	1.35195	0.839697	0.90279	1.08176	1.49175	0.669491	1.33458	0.437165	1.01333	1.04323	0.967024	0.816009
ENSMUSG00000002100	Mybpc3	myosin binding protein C, cardiac [Source:MGI Symbol;Acc:MGI:102844]	18372	blue	0.00910645	0.904247	-0.0332671	0.660245	-0.842862	5.73039e-49	0.275083	0.000210924	-0.322251	1.21908e-05	0.420984	5.39253e-09	0.365189	5.79892e-07	0.933992	3.87618e-80	-0.879553	2.42254e-58	1.08851	0.115477	0	0.931252	0	0	1.07333	0	0	0.999605	0.146083	0	1.14429	0.0782066	0	1.15713	0.0582421	0	0.85618	0	0	0.944709	0.0777816	0.0400247	1.53693	0.089556	0.0460887
ENSMUSG00000027257	Pacsin3	protein kinase C and casein kinase substrate in neurons 3 [Source:MGI Symbol;Acc:MGI:1891410]	8725	blue	-0.0061654	0.935088	-0.0479811	0.525957	-0.843143	4.96418e-49	0.160893	0.032409	-0.403312	2.60746e-08	0.480299	1.33186e-11	0.371298	3.62105e-07	0.876803	1.54091e-57	-0.82245	9.69399e-45	2.3189	1.59356	1.69537	2.52963	1.86145	1.56119	2.58376	1.55312	1.59226	2.38102	1.59428	1.83979	2.48222	1.19551	1.8073	2.67183	2.16022	1.78541	2.54033	1.70631	1.84588	2.75563	1.88079	1.61976	2.78898	1.23176	1.47364
ENSMUSG00000040549	Ckap5	cytoskeleton associated protein 5 [Source:MGI Symbol;Acc:MGI:1923036]	93902	blue	0.17747	0.0181209	-0.0977972	0.195322	-0.481491	1.16617e-11	0.201668	0.00710836	-0.103628	0.169873	0.0145259	0.847824	0.292058	8.00015e-05	0.418409	6.82316e-09	-0.364466	6.12732e-07	1.19054	1.24461	1.21607	1.18546	1.15288	1.07436	1.2193	1.16821	1.20834	0.958442	1.21006	1.06908	1.35781	1.31163	1.08964	1.30497	1.06776	1.15645	1.18746	1.31081	1.02623	1.18573	1.26839	1.10824	1.38045	1.3455	1.28414
ENSMUSG00000027239	Mdk	midkine [Source:MGI Symbol;Acc:MGI:96949]	2492	blue	-0.0424436	0.574847	-0.0446069	0.555496	-0.658958	2.061e-23	0.274082	0.000222905	-0.260299	0.000466954	0.59462	2.64002e-18	0.0809128	0.284347	0.90949	1.29349e-68	-0.895957	1.39033e-63	3.62357	1.15622	1.93747	3.3388	0.797174	1.90006	3.77232	2.29268	0.741547	3.80766	1.56756	1.81576	3.41105	1.79247	1.52384	3.81758	1.64432	1.51225	3.39055	0.993138	2.21221	2.78414	2.09325	1.80271	3.22428	0.557922	1.28448
ENSMUSG00000027222	Pex16	peroxisomal biogenesis factor 16 [Source:MGI Symbol;Acc:MGI:1338829]	6541	blue	-0.0034445	0.963708	0.146851	0.0511194	-0.408896	1.6004e-08	0.089501	0.236146	-0.192909	0.0100962	0.316423	1.78126e-05	0.146193	0.0521807	0.421131	5.32025e-09	-0.421108	5.33145e-09	1.59147	1.5223	1.05541	1.82674	1.08691	1.49655	1.44527	1.35834	1.18906	1.57607	1.88508	1.62318	1.15307	0.955138	1.45769	1.26762	0.429889	1.51232	1.71183	1.52949	1.35473	1.84701	1.35382	1.2285	1.71776	1.57467	1.24346
ENSMUSG00000049922	Slc35c1	solute carrier family 35, member C1 [Source:MGI Symbol;Acc:MGI:2443301]	7774	blue	-0.0639799	0.397534	-0.00268894	0.971665	-0.480581	1.29077e-11	-0.047496	0.530154	-0.376161	2.472e-07	0.69884	2.92392e-27	-0.114297	0.129818	0.590835	4.86625e-18	-0.618539	4.56815e-20	1.29406	1.12541	0.931515	1.46133	1.12589	0.663482	1.29269	1.03751	0.719148	1.55834	0.811877	1.23056	2.03184	0.610304	1.00146	1.60679	0.663705	1.02802	1.70164	0.965353	1.20818	1.19627	1.03371	0.846219	1.91924	0.932135	0.882744
ENSMUSG00000027180	Fbxo3	F-box protein 3 [Source:MGI Symbol;Acc:MGI:1929084]	35519	blue	-0.00147176	0.984489	0.0880786	0.243706	-0.805461	1.29391e-41	0.267187	0.000324289	-0.288518	9.8432e-05	0.447637	4.18757e-10	0.335572	4.97207e-06	0.874508	6.97915e-57	-0.852135	4.29406e-51	2.1343	1.45717	1.26622	1.68598	1.35202	1.28553	2.00144	1.5148	1.57536	1.93662	1.59063	1.42219	2.16379	1.55113	1.35039	2.01435	1.6367	1.53648	2.03781	1.29829	1.58101	1.80754	1.45827	1.44201	1.99075	1.42729	1.28925
ENSMUSG00000032679	Cd59a	CD59a antigen [Source:MGI Symbol;Acc:MGI:109177]	19553	blue	-0.0784407	0.299367	-0.0663483	0.380259	-0.489435	4.74783e-12	0.172651	0.0215628	-0.244604	0.00103376	0.521506	9.87035e-14	0.0266941	0.724322	0.730948	7.48718e-31	-0.725947	2.93156e-30	1.13937	0.593544	0.736342	1.05974	0.460556	1.03187	1.10626	1.12242	0.677611	0.780835	0.536611	0.973564	1.34862	0.450361	0.928294	1.16443	0.729476	0.614693	1.20081	0.372459	1.20323	0.990908	0.4482	1.13057	0.921016	0.784164	0.384065
ENSMUSG00000027168	Pax6	paired box 6 [Source:MGI Symbol;Acc:MGI:97490]	28464	blue	0.020277	0.788789	-0.00113488	0.988039	-0.840425	1.9681e-48	0.282854	0.000136369	-0.321299	1.2977e-05	0.594862	2.53824e-18	0.228963	0.00217377	0.974736	7.36414e-116	-0.958614	2.08004e-97	1.87859	0.48893	0.384023	1.53065	0.438522	0.377415	1.8214	0.404296	0.304886	1.74532	0.185941	0.432302	1.84547	0.100183	0.328178	1.93472	0.340164	0.191455	2.01632	0.157851	0.354309	2.10773	0.440993	0.347507	1.67443	0.366647	0.347533
ENSMUSG00000074971	Fibin	fin bud initiation factor homolog (zebrafish) [Source:MGI Symbol;Acc:MGI:1914856]	2266	blue	-0.00910927	0.904218	-0.0271088	0.720217	-0.272921	0.000237601	0.255052	0.000612456	-0.0292932	0.698725	0.425138	3.67332e-09	-0.129882	0.0848839	0.52834	4.09781e-14	-0.546224	3.73084e-15	2.11148	0.744711	1.13564	2.11846	0.491221	1.32331	1.869	1.08989	0.453643	1.75843	1.65988	1.10764	2.04972	0.928483	1.10158	1.50941	0	0.81884	1.55194	1.06302	1.69951	2.34761	0.535174	1.6101	1.67929	1.35485	1.86073
ENSMUSG00000027133	Nop10	NOP10 ribonucleoprotein [Source:MGI Symbol;Acc:MGI:1913431]	1343	blue	-0.162849	0.0303344	0.0724208	0.338099	-0.430793	2.16018e-09	-0.190632	0.0110355	-0.464096	7.71094e-11	0.527359	4.65478e-14	0.0869695	0.249716	0.490677	4.11669e-12	-0.46805	5.06621e-11	6.17893	5.91359	5.69772	6.22643	5.98371	5.60708	6.2474	5.90762	5.99925	5.75705	5.81747	5.41622	5.87334	5.98838	5.647	6.26748	5.86994	5.84018	6.46544	6.1086	5.65268	6.23231	5.94538	5.94061	5.94728	5.74323	5.89767
ENSMUSG00000068615	Gjd2	gap junction protein, delta 2 [Source:MGI Symbol;Acc:MGI:1334209]	4018	blue	-0.0871873	0.248528	-0.030093	0.690914	-0.712122	1.09638e-28	0.291607	8.21567e-05	-0.24525	0.00100144	0.437977	1.08473e-09	0.245892	0.000970279	0.874524	6.90888e-57	-0.838217	5.91143e-48	2.56484	0.965386	0.856135	2.51408	0.75385	1.50376	1.61216	1.71866	1.29787	2.47766	0.981475	1.2827	1.58129	1.33813	0.828216	2.24786	0.810211	1.10364	2.36194	0.268763	1.18125	1.80682	1.82083	1.41801	1.96294	1.46309	0.91883
ENSMUSG00000074916	Chst14	carbohydrate sulfotransferase 14 [Source:MGI Symbol;Acc:MGI:1919386]	2089	blue	0.0741349	0.326759	-0.06752	0.371884	-0.354116	1.32846e-06	0.114825	0.128043	-0.206301	0.00587083	0.427998	2.81173e-09	-0.0429004	0.570735	0.540936	7.69108e-15	-0.527465	4.59089e-14	0	0.793176	0.831193	1.49198	0	1.06106	1.28616	1.30395	0.84928	0	0	0.808734	1.18737	0.57522	0.320308	1.38003	1.06138	0.3519	0.878391	0	0.624672	1.30963	0.57257	0.992494	1.37456	0	1.27945
ENSMUSG00000070730	Rmdn3	regulator of microtubule dynamics 3 [Source:MGI Symbol;Acc:MGI:1915059]	20033	blue	-0.0343189	0.650202	-0.113227	0.133474	-0.802277	4.60873e-41	0.273678	0.000227923	-0.277329	0.000186192	0.30603	3.4363e-05	0.461338	1.03037e-10	0.878751	4.17465e-58	-0.801134	7.22806e-41	2.38584	1.73592	1.67524	2.29102	1.67914	1.46261	2.25952	1.65289	1.91014	2.31899	1.84387	1.51352	2.5126	1.82957	1.69126	2.67581	1.65695	1.82167	2.66278	1.90758	1.89227	2.61525	1.94293	1.66317	2.64933	1.61148	1.67943
ENSMUSG00000034216	Vps18	VPS18 CORVET/HOPS core subunit [Source:MGI Symbol;Acc:MGI:2443626]	9713	blue	-0.0239163	0.75202	-0.00882816	0.90716	-0.4756	2.23747e-11	0.256099	0.000580426	-0.113383	0.132937	0.343618	2.83359e-06	0.143754	0.0562748	0.594413	2.73061e-18	-0.601616	8.34746e-19	1.60122	0.838441	0.787565	1.56041	0.813164	0.862225	1.16206	0.839859	0.828478	1.15266	1.44002	0.811005	1.2471	0.507373	0.513724	0.96195	1.21703	0.873233	1.17766	0.671716	0.714545	1.28167	0.878306	0.888587	1.39357	1.43077	0.634699
ENSMUSG00000023572	Ccndbp1	cyclin D-type binding-protein 1 [Source:MGI Symbol;Acc:MGI:109595]	8501	blue	0.00230271	0.975733	0.0771759	0.307251	-0.709806	1.96932e-28	0.0268894	0.722387	-0.491144	3.9013e-12	0.755558	5.64139e-34	0.0605749	0.423177	0.846298	9.70766e-50	-0.839819	2.66584e-48	2.34898	1.66045	1.66446	2.42371	1.4489	1.95236	2.59412	1.93652	1.47136	2.41141	1.38519	1.65763	2.59033	1.48841	2.04108	2.54218	2.04128	1.81214	2.80202	1.77386	1.76417	2.78766	1.71131	2.01429	2.55897	1.91385	1.75928
ENSMUSG00000074884	Serf2	small EDRK-rich factor 2 [Source:MGI Symbol;Acc:MGI:1337041]	9118	blue	0.023684	0.754351	-0.0285116	0.706388	-0.502758	9.97533e-13	0.196919	0.00861307	-0.175613	0.0193857	0.326397	9.26287e-06	0.135929	0.0712335	0.652375	7.83088e-23	-0.616325	6.74742e-20	2.69341	2.5939	2.51116	2.7509	2.49497	2.56465	2.79357	2.66198	2.64018	2.63511	2.78755	2.32721	2.81726	2.57012	2.73087	3.10759	2.11113	2.31822	3.03606	2.33933	2.48371	2.72032	2.56341	2.70004	2.8488	2.49709	2.54602
ENSMUSG00000048222	Mfap1b	microfibrillar-associated protein 1B [Source:MGI Symbol;Acc:MGI:3694697]	13832	blue	-0.0242579	0.748596	0.00176334	0.981416	-0.277898	0.000180368	-0.187292	0.012552	-0.39264	6.46682e-08	0.422515	4.68388e-09	0.0721462	0.339939	0.339141	3.88208e-06	-0.336513	4.6593e-06	1.10852	1.14896	1.04199	1.02881	0.997678	1.18375	1.4244	1.07678	0.885529	1.11857	1.04371	1.16912	1.61249	1.02562	1.16284	1.10418	1.24364	0.907745	1.56679	1.16939	1.25774	1.15597	1.42881	1.15901	1.17823	1.52175	1.1138
ENSMUSG00000060802	B2m	beta-2 microglobulin [Source:MGI Symbol;Acc:MGI:88127]	5397	blue	-0.0124513	0.869348	0.0589752	0.435548	-0.56333	3.28663e-16	0.0471613	0.53306	-0.346823	2.25505e-06	0.648828	1.58565e-22	-0.0219103	0.772224	0.698161	3.4418e-27	-0.728234	1.57642e-30	4.33446	3.84124	3.63926	4.09914	3.37394	3.56423	4.32725	3.67259	3.71157	4.43387	3.61413	3.61471	4.27008	3.60738	3.44772	4.34954	3.39727	3.3649	4.62571	3.92391	3.7186	4.2824	3.708	3.78996	4.17866	3.85962	3.45225
ENSMUSG00000085633	Bloc1s6os	biogenesis of lysosomal organelles complex-1, subunit 6, pallidin, opposite strand [Source:MGI Symbol;Acc:MGI:1923165]	5476	blue	-0.0771977	0.307114	-0.0143785	0.849349	-0.45477	2.0338e-10	0.25059	0.000767944	-0.114225	0.130062	0.283239	0.00013341	0.132173	0.0794833	0.603935	5.66252e-19	-0.615696	7.53448e-20	1.02204	0.18877	0.260816	0.871719	0.22386	0.142239	0.349857	0	0	1.36623	0.440965	0.131699	0.857713	0	0	0.205211	0.186771	0	0.565314	0.201951	0	0.64536	0.245918	0.24946	0.541757	0	0
ENSMUSG00000027203	Dut	deoxyuridine triphosphatase [Source:MGI Symbol;Acc:MGI:1346051]	11418	blue	-0.0819426	0.278243	-0.0668657	0.376546	-0.655076	4.54689e-23	0.114212	0.130107	-0.36161	7.60673e-07	0.562535	3.69089e-16	0.1599	0.0335071	0.817318	9.22018e-44	-0.792166	2.24076e-39	2.48904	1.90642	1.9092	2.27715	1.77191	1.62627	2.45285	2.04812	1.50245	2.58825	1.57134	1.75862	2.26819	1.7357	1.62863	2.33112	1.61112	1.99344	2.48576	1.62749	1.9168	2.61836	1.80557	1.87602	2.53819	1.66174	1.76668
ENSMUSG00000003660	Snrnp200	small nuclear ribonucleoprotein 200 (U5) [Source:MGI Symbol;Acc:MGI:2444401]	32065	blue	0.143266	0.0571254	-0.0287193	0.704349	-0.168133	0.0252889	0.0105286	0.889382	-0.167831	0.0255566	0.261181	0.000445896	-0.111715	0.138773	0.303571	3.99979e-05	-0.268359	0.000304476	1.48011	1.55274	1.67791	1.43329	1.57431	1.64314	1.72094	1.6049	1.60251	1.35022	1.50165	1.66495	1.71135	1.62039	1.55753	1.47253	1.63261	1.45717	1.39971	1.54819	1.34234	1.43832	1.31714	1.80666	1.38323	1.7592	1.74938
ENSMUSG00000003662	Ciao1	cytosolic iron-sulfur protein assembly 1 [Source:MGI Symbol;Acc:MGI:1346998]	6878	blue	-0.100326	0.183963	0.0926721	0.219887	-0.559336	5.86865e-16	-0.0957273	0.204992	-0.447796	4.1213e-10	0.673024	1.06027e-24	0.0807113	0.285553	0.592829	3.52962e-18	-0.616469	6.57903e-20	2.63171	2.00181	1.49277	2.10549	1.64995	1.57526	2.30244	2.21531	1.92594	2.30041	1.88911	2.09501	2.28679	2.04429	1.70714	2.55284	1.57566	1.97692	2.63683	2.16	1.79436	2.45717	1.54771	2.1314	2.42066	1.13584	1.94914
ENSMUSG00000027374	Mrps5	mitochondrial ribosomal protein S5 [Source:MGI Symbol;Acc:MGI:1924971]	19607	blue	-0.00330439	0.965183	-0.117594	0.11904	-0.396919	4.50995e-08	0.149442	0.0471147	-0.183812	0.0143237	0.328295	8.15733e-06	0.0749524	0.321438	0.550098	2.17831e-15	-0.487537	5.89718e-12	1.31465	1.40041	1.16685	1.64363	1.26687	1.45225	1.5629	1.31435	0.890684	1.54996	1.43159	1.20669	1.53871	1.17166	1.38718	1.77962	1.32507	1.27066	1.38279	1.39867	1.37163	1.22602	1.20014	1.29265	1.51946	1.13762	1.33392
ENSMUSG00000037938	Chchd5	coiled-coil-helix-coiled-coil-helix domain containing 5 [Source:MGI Symbol;Acc:MGI:1913420]	4434	blue	-0.0191712	0.800057	-0.0455958	0.546756	-0.34431	2.69778e-06	0.221035	0.00311148	-0.0665283	0.378965	0.285597	0.000116552	0.0680378	0.368219	0.490998	3.96764e-12	-0.464007	7.78378e-11	1.43155	0.229764	1.30354	1.13466	0.871212	0.71355	1.01206	0.758825	0.249542	1.14925	0.527599	0.9593	1.13988	1.10705	1.0385	1.52995	0.596537	1.02939	1.12756	0.638479	1.34012	1.54396	0.755797	0.662482	0.954625	0	0.853618
ENSMUSG00000027397	Slc20a1	solute carrier family 20, member 1 [Source:MGI Symbol;Acc:MGI:108392]	12852	blue	0.022151	0.769791	-0.0293865	0.697812	-0.816604	1.25467e-43	0.198315	0.00814382	-0.352954	1.44666e-06	0.482653	1.02399e-11	0.322803	1.17556e-05	0.869568	1.63397e-55	-0.824361	4.11176e-45	3.43414	2.81061	2.69777	3.24579	2.70199	2.36458	3.54111	2.70748	2.72305	3.70244	2.57306	2.87839	3.71278	2.89725	2.54817	3.65454	3.05353	3.13222	3.4253	2.58341	3.02399	3.47967	2.81109	2.61051	3.81507	2.63652	2.71558
ENSMUSG00000027342	Pcna	proliferating cell nuclear antigen [Source:MGI Symbol;Acc:MGI:97503]	4152	blue	-0.00651837	0.931381	-0.0740845	0.327089	-0.222544	0.0029089	-0.128114	0.0892481	-0.322802	1.1756e-05	0.342302	3.11003e-06	-0.0155306	0.83744	0.324678	1.03852e-05	-0.281288	0.000149047	3.15872	3.03393	2.91334	2.65304	2.49799	2.38858	2.90978	2.47454	2.64225	2.95675	2.5148	2.71079	2.51426	2.30561	2.85874	2.44232	2.84755	2.71356	2.83105	2.47452	2.59541	2.49828	2.29918	2.57993	2.32399	2.60901	2.40849
ENSMUSG00000027423	Snx5	sorting nexin 5 [Source:MGI Symbol;Acc:MGI:1916428]	20783	blue	-0.192926	0.0100896	-0.0676804	0.370746	-0.436749	1.22172e-09	-0.105913	0.160603	-0.451681	2.7863e-10	0.58609	1.03574e-17	0.0600814	0.426971	0.603483	6.10929e-19	-0.560512	4.95134e-16	2.13585	1.69902	1.76626	2.04753	1.77925	1.90975	2.20648	1.89029	1.70312	1.8885	2.00517	1.80459	1.88608	1.87149	2.08692	1.88691	2.09678	1.9895	2.14166	1.72079	2.1027	2.05609	1.70156	1.967	1.98623	1.54836	1.99436
ENSMUSG00000002728	Naa20	N(alpha)-acetyltransferase 20, NatB catalytic subunit [Source:MGI Symbol;Acc:MGI:1915127]	14326	blue	-0.00779189	0.918017	-0.021678	0.774573	-0.393278	6.1303e-08	0.349156	1.90666e-06	-0.0233418	0.75779	0.349856	1.81254e-06	0.0358325	0.63586	0.640924	7.38973e-22	-0.633301	3.12589e-21	1.47148	1.25658	1.12037	1.63908	1.51635	1.53661	1.33403	1.27982	1.03703	1.19012	1.40047	1.4804	1.54831	1.40221	1.39575	1.57847	1.30992	1.36231	1.22939	1.17857	1.47394	1.50227	0.996056	1.26722	1.18745	1.30937	1.45863
ENSMUSG00000074743	Thbd	thrombomodulin [Source:MGI Symbol;Acc:MGI:98736]	3722	blue	0.00472017	0.950282	-0.0351125	0.642665	-0.450095	3.27109e-10	0.127669	0.0903744	-0.237496	0.00145781	0.588434	7.14215e-18	-0.0848186	0.261664	0.681447	1.65684e-25	-0.687565	4.13547e-26	2.26044	1.28669	2.02189	2.86948	0.991187	1.57618	2.27374	1.67748	1.0873	2.4965	1.36624	1.56987	2.80209	1.67794	1.56236	2.51668	1.15061	1.06025	3.09225	2.10966	1.90192	2.67691	1.67239	2.55091	2.61838	0.70685	1.62436
ENSMUSG00000036992	Nxt1	NTF2-related export protein 1 [Source:MGI Symbol;Acc:MGI:1929619]	3426	blue	-0.0346807	0.646761	-0.0752823	0.319307	-0.434421	1.52859e-09	0.00462002	0.951335	-0.359816	8.70437e-07	0.603543	6.0485e-19	-0.0282392	0.709066	0.6368	1.62044e-21	-0.618556	4.55394e-20	1.90534	0.921247	1.27814	2.25039	1.65367	1.80085	2.02522	1.62764	0.574126	1.17701	1.44058	1.5025	1.7384	1.48146	1.89858	2.29545	1.34847	1.67341	2.02397	1.5466	1.21512	2.20375	1.47628	1.70612	1.77743	0	1.85247
ENSMUSG00000087035	Tmem74bos	transmembrane 74B, opposite strand [Source:MGI Symbol;Acc:MGI:3039588]	6978	blue	0.0792839	0.294186	-0.00718547	0.924378	-0.776207	6.76725e-37	0.32135	1.29333e-05	-0.243758	0.0010775	0.446247	4.8109e-10	0.281623	0.000146246	0.90304	4.00077e-66	-0.864626	3.37448e-54	0.855125	0	0.108025	1.20316	0.178522	0.217388	0.719043	0.197356	0.310311	0.69524	0	0	1.18567	0.371084	0	1.05629	0.148561	0.114631	1.00279	0.160805	0	0.997169	0.19641	0.103082	1.47935	0	0.118317
ENSMUSG00000074682	Zcchc3	zinc finger, CCHC domain containing 3 [Source:MGI Symbol;Acc:MGI:1915167]	3072	blue	0.0982217	0.193381	-0.0410103	0.58784	-0.353387	1.40154e-06	0.508353	5.07631e-13	0.105335	0.162912	0.216237	0.00384339	0.0274784	0.716564	0.689104	2.90113e-26	-0.646254	2.6303e-22	3.00783	2.80332	2.80835	3.5362	2.80409	3.13052	2.83085	2.80608	2.56216	3.06757	2.88222	3.02787	3.27595	2.58427	3.13361	3.35953	2.4422	2.80964	3.12035	1.98045	2.28361	3.29262	2.93086	3.01186	3.42608	2.6695	3.31185
ENSMUSG00000042745	Id1	inhibitor of DNA binding 1, HLH protein [Source:MGI Symbol;Acc:MGI:96396]	1159	blue	0.00856186	0.909949	0.0741325	0.326775	-0.119156	0.114184	0.229012	0.00216895	0.0200076	0.79153	0.367207	4.96894e-07	-0.21203	0.00460885	0.41435	9.84855e-09	-0.408965	1.59063e-08	3.80605	3.26097	3.76969	4.31836	3.93312	4.21912	4.39903	4.22127	2.59857	3.07989	3.36322	4.21822	4.27939	3.91917	4.2075	4.30577	3.94173	3.38682	4.61003	3.45137	3.77574	4.43674	3.82489	4.23551	3.03168	4.10793	3.73875
ENSMUSG00000007659	Bcl2l1	BCL2-like 1 [Source:MGI Symbol;Acc:MGI:88139]	51060	blue	0.0377905	0.617507	-0.0557844	0.460831	-0.50082	1.25705e-12	0.302422	4.29196e-05	-0.00390815	0.958826	-0.279258	0.000167134	0.603055	6.56378e-19	0.403515	2.56193e-08	-0.281926	0.000143757	1.29605	1.05619	1.09556	1.32939	1.41908	1.09321	1.35609	1.13227	1.39143	1.16869	1.34123	0.988481	1.49145	1.2283	1.11745	1.45295	1.10848	1.11375	1.20372	1.06747	1.20662	1.23956	1.23593	1.04461	1.55522	1.39839	0.9519
ENSMUSG00000027472	Pdrg1	p53 and DNA damage regulated 1 [Source:MGI Symbol;Acc:MGI:1915809]	6537	blue	-0.00554899	0.941566	-0.180111	0.0164446	-0.64984	1.29782e-22	0.00708309	0.925452	-0.312174	2.33715e-05	-0.133415	0.0766742	0.767572	1.22661e-35	0.399354	3.66545e-08	-0.282617	0.000138222	2.87425	2.96198	2.63896	3.03267	2.84536	2.36915	2.87224	2.20137	2.81144	2.79666	2.8951	2.49673	3.08471	3.19234	2.9694	3.03043	2.63462	2.38882	2.81306	2.73638	2.81979	2.86027	2.6538	2.41911	3.21284	2.83181	2.09909
ENSMUSG00000038467	Chmp4b	charged multivesicular body protein 4B [Source:MGI Symbol;Acc:MGI:1922858]	43080	blue	-0.0557289	0.461277	-0.0724857	0.337665	-0.668594	2.74721e-24	-0.120837	0.109129	-0.605549	4.31498e-19	0.602016	7.80862e-19	0.178588	0.0173941	0.809361	2.64464e-42	-0.736105	1.77415e-31	3.40121	3.09924	3.20341	3.41063	3.14596	3.12621	3.40505	3.24624	3.10094	3.40636	3.14019	3.1807	3.38916	3.0269	3.26772	3.6032	3.10555	3.10126	3.478	3.02894	3.10326	3.38509	3.00716	3.17983	3.64488	2.95853	3.19441
ENSMUSG00000027613	Eif6	eukaryotic translation initiation factor 6 [Source:MGI Symbol;Acc:MGI:1196288]	7093	blue	-0.0808961	0.284447	-0.0851558	0.259766	-0.388132	9.40098e-08	-0.0155177	0.837572	-0.235881	0.00157401	0.149176	0.0475132	0.289515	9.28731e-05	0.3416	3.26771e-06	-0.29458	6.89022e-05	2.39074	1.84405	1.75327	2.10772	1.67942	1.76547	1.73578	1.62815	1.4074	2.26513	1.68171	1.89931	2.09101	1.95817	1.86226	2.10576	1.69635	1.78271	1.98652	1.67987	2.03982	2.23326	2.10434	1.73625	1.79199	1.80249	1.59358
ENSMUSG00000103285	Gm37274	predicted gene, 37274 [Source:MGI Symbol;Acc:MGI:5610502]	1681	blue	-0.0183392	0.808564	0.0718792	0.341734	-0.526994	4.88017e-14	0.557337	7.82119e-16	0.109195	0.14796	0.242187	0.00116323	0.158468	0.0351461	0.696986	4.55906e-27	-0.705162	6.26779e-28	1.92533	0	0.718536	2.05444	0	1.00908	1.47922	0.383238	0	2.45885	0.662035	0.698434	1.63995	0.685994	0.388393	1.58099	0.536295	1.02138	1.35766	0	1.23067	1.50472	0	0.691452	2.31005	0	0.773633
ENSMUSG00000074629	4930518I15Rik	RIKEN cDNA 4930518I15 gene [Source:MGI Symbol;Acc:MGI:1921954]	1596	blue	0.0222253	0.769041	0.0346742	0.646824	-0.223662	0.00276661	0.363799	6.4458e-07	0.118609	0.115864	0.159541	0.0339118	-0.0155918	0.836808	0.35556	1.19447e-06	-0.379595	1.88062e-07	0	0	1.01424	0.962796	0.656194	0	0.957251	0.971892	0	0	0.690038	0	1.08041	0	0.406415	0.608295	0.559954	0.445271	0	1.02223	0	1.55364	0.711632	0.404716	0	0	0
ENSMUSG00000027637	Rab5if	RAB5 interacting factor [Source:MGI Symbol;Acc:MGI:1914638]	10435	blue	-0.00719449	0.924283	-0.0310916	0.681208	-0.648087	1.83518e-22	0.0038471	0.959469	-0.463632	8.09768e-11	0.749361	3.73138e-33	0.0143013	0.850149	0.796246	4.79805e-40	-0.793632	1.29328e-39	2.85214	1.97612	2.07847	2.96763	1.71818	2.03541	2.75716	2.06556	1.54878	2.7866	1.78197	2.02139	3.0286	1.74579	2.09917	2.79407	2.25447	1.80262	2.76341	2.18529	1.78271	2.72787	1.78165	2.00764	2.7006	1.75182	2.09008
ENSMUSG00000027634	Ndrg3	N-myc downstream regulated gene 3 [Source:MGI Symbol;Acc:MGI:1352499]	64711	blue	0.168896	0.0246231	-0.0113885	0.880413	-0.748247	5.21033e-33	-0.0903862	0.231525	-0.478833	1.56718e-11	0.313374	2.16543e-05	0.445224	5.32609e-10	0.55092	1.94158e-15	-0.501599	1.14568e-12	1.79554	1.52651	1.54181	1.68873	1.59989	1.46135	1.68609	1.55019	1.61832	1.73123	1.77412	1.60327	1.76201	1.74012	1.6557	1.94324	1.60174	1.68727	1.78058	1.68933	1.37396	1.84869	1.5218	1.5444	1.97018	1.54958	1.55356
ENSMUSG00000067787	Blcap	bladder cancer associated protein [Source:MGI Symbol;Acc:MGI:1858907]	14912	blue	0.0239657	0.751525	-0.00386018	0.959331	-0.246135	0.000958747	0.144341	0.0552669	-0.17509	0.0197557	0.659182	1.96822e-23	-0.314278	2.04414e-05	0.644761	3.52002e-22	-0.645787	2.88184e-22	2.20038	1.74905	1.91271	2.29595	1.60127	2.33151	2.30169	2.19129	1.94992	2.43786	1.43654	1.83282	2.23211	1.58028	2.03544	2.2341	1.73757	2.00664	1.88796	1.0728	1.94357	2.14344	1.60758	2.13637	2.24418	1.53289	1.94095
ENSMUSG00000027651	Rprd1b	regulation of nuclear pre-mRNA domain containing 1B [Source:MGI Symbol;Acc:MGI:1917720]	103800	blue	-0.0552783	0.464915	-0.0820982	0.277328	-0.739731	6.31566e-32	0.341	3.40838e-06	-0.19977	0.0076791	0.303112	4.11425e-05	0.391279	7.24451e-08	0.881456	6.55711e-59	-0.820862	1.96132e-44	1.41066	0.925786	0.884994	1.27233	0.838436	0.855206	1.23935	0.866225	0.934691	1.37411	0.965296	0.869457	1.25074	0.946197	0.811852	1.2984	0.867058	0.959842	1.34216	0.910622	0.925748	1.29765	0.897464	0.784059	1.57509	0.939715	0.804819
ENSMUSG00000037771	Slc32a1	solute carrier family 32 (GABA vesicular transporter), member 1 [Source:MGI Symbol;Acc:MGI:1194488]	4981	blue	-0.0365363	0.629237	-0.00517393	0.945509	-0.793575	1.32094e-39	0.199847	0.0076552	-0.360219	8.44507e-07	0.518049	1.52834e-13	0.245824	0.000973532	0.906	3.03019e-67	-0.863832	5.42765e-54	4.8462	3.76575	3.79213	5.06777	3.87338	3.94046	5.07619	3.91339	3.93432	5.33864	3.14744	3.8635	5.06612	3.86399	3.95346	5.22102	4.03094	3.64033	5.10437	4.10334	4.10841	5.02124	3.46094	3.98529	5.44586	3.4175	3.6841
ENSMUSG00000037754	Ppp1r16b	protein phosphatase 1, regulatory subunit 16B [Source:MGI Symbol;Acc:MGI:2151841]	100936	blue	0.0662605	0.380891	0.0378289	0.61715	-0.662497	9.91743e-24	0.265056	0.000363387	-0.259169	0.000495267	0.696283	5.38968e-27	-0.0454436	0.548096	0.866218	1.28965e-54	-0.894655	3.89045e-63	1.44093	0.74414	1.01911	1.48971	0.84178	0.92983	1.44342	1.01692	0.941673	1.21177	0.942084	1.09467	1.36098	0.864949	0.994935	1.42852	0.925854	1.06486	1.41447	0.954142	0.910992	1.32614	0.735914	1.02091	0.980041	0.735035	0.990403
ENSMUSG00000099632	2900093K20Rik	RIKEN cDNA 2900093K20 gene [Source:MGI Symbol;Acc:MGI:1915287]	601	blue	-0.0366628	0.62805	0.089547	0.235904	-0.580783	2.37592e-17	0.329593	7.47475e-06	-0.119115	0.114309	0.344824	2.601e-06	0.185458	0.0134604	0.721301	1.01454e-29	-0.734025	3.1833e-31	4.05774	0	3.18978	3.47007	2.48238	3.24746	4.20973	2.79851	2.37278	4.60665	2.55734	2.99408	4.22959	2.61083	2.41155	4.35743	1.81503	2.27522	3.96065	2.3525	3.50575	3.79183	3.24286	2.8114	4.97507	1.56449	3.16006
ENSMUSG00000017734	Dbndd2	dysbindin (dystrobrevin binding protein 1) domain containing 2 [Source:MGI Symbol;Acc:MGI:106562]	7213	blue	-0.0270199	0.721096	-0.191414	0.0107045	-0.444054	5.9815e-10	0.243943	0.00106779	-0.0858315	0.25599	-0.0406335	0.591278	0.407006	1.88974e-08	0.503648	8.96692e-13	-0.401055	3.16815e-08	3.53164	2.98154	3.59182	3.4835	3.23427	3.32861	3.7438	3.44987	3.56014	3.4832	3.56763	3.34245	3.26786	3.09083	3.13352	3.79504	3.29486	3.20795	3.24758	3.32359	3.7269	3.57545	3.28506	3.29473	3.64768	3.51598	3.35903
ENSMUSG00000050373	Snx21	sorting nexin family member 21 [Source:MGI Symbol;Acc:MGI:1917729]	7993	blue	-0.082628	0.274229	-0.105654	0.161633	-0.657736	2.64729e-23	0.11809	0.11748	-0.225649	0.0025291	0.0291951	0.699685	0.567972	1.65895e-16	0.488787	5.11357e-12	-0.449344	3.52796e-10	1.69434	1.227	1.27825	1.5336	1.77185	0.5119	1.52614	0.873316	1.30247	1.72126	1.68005	0.668444	1.68959	1.77936	0.933273	1.10563	1.0951	1.00773	1.57138	1.6607	0.993725	1.3482	1.01335	1.31452	2.00656	1.12275	0.922481
ENSMUSG00000017754	Pltp	phospholipid transfer protein [Source:MGI Symbol;Acc:MGI:103151]	18193	blue	0.0411326	0.586726	-0.0337624	0.655507	-0.604642	5.02797e-19	0.398489	3.94665e-08	-0.0795867	0.29234	0.273475	0.000230474	0.242645	0.0011376	0.805618	1.21478e-41	-0.74473	1.47761e-32	1.94264	0.813424	0.778821	1.45862	0.933131	1.32021	1.65429	1.12484	0.717477	1.56521	0.765077	0.655721	1.97581	1.16193	1.05985	1.61842	1.14173	0.561484	1.86677	0.822795	0.612456	1.73758	0.878988	1.15157	1.83213	1.15626	0.988007
ENSMUSG00000039849	Pcif1	phosphorylated CTD interacting factor 1 [Source:MGI Symbol;Acc:MGI:2443858]	15150	blue	0.0630284	0.404605	-0.0272246	0.719071	-0.63902	1.06349e-21	0.27958	0.000164129	-0.199832	0.00765984	0.513012	2.86492e-13	0.075004	0.321104	0.784459	3.75363e-38	-0.787791	1.12593e-38	1.92386	0.728454	1.10164	1.35035	0.978736	1.13651	1.83958	1.1029	0.955695	1.77569	1.11304	1.07421	1.37028	0.90933	1.22457	1.2848	1.20094	0.993017	1.51072	0.815844	1.10976	1.42343	1.00549	1.11095	1.40452	1.00692	1.01686
ENSMUSG00000017670	Elmo2	engulfment and cell motility 2 [Source:MGI Symbol;Acc:MGI:2153045]	38448	blue	0.0284297	0.707193	0.0217929	0.773412	-0.632741	3.4699e-21	0.127282	0.0913617	-0.329971	7.28676e-06	0.707539	3.4753e-28	-0.0225618	0.765645	0.775201	9.54703e-37	-0.796922	3.70559e-40	1.71175	1.22278	1.29482	1.75853	1.13444	1.30788	1.60978	1.42017	0.985467	1.6993	1.32315	1.50479	1.85368	1.26949	1.40483	1.97784	1.15088	1.31376	2.00224	1.4164	1.03221	1.81181	1.04179	1.33284	1.79351	1.0924	1.13383
ENSMUSG00000013523	Bcas1	brain enriched myelin associated protein 1 [Source:MGI Symbol;Acc:MGI:1924210]	80854	blue	-0.14252	0.058446	-0.0981439	0.193735	-0.340117	3.62616e-06	0.403815	2.49624e-08	0.0319709	0.672705	0.340559	3.51546e-06	-0.0298533	0.693252	0.71171	1.21718e-28	-0.676793	4.65561e-25	1.74431	0.813453	1.2645	1.56905	1.10312	1.08599	1.48692	1.16341	0.957794	1.64342	1.0294	0.993101	1.32605	0.707414	1.03347	1.58401	0.790891	0.858882	1.57621	0.875344	1.46675	1.48814	0.872421	1.2161	1.54794	0.56581	1.00228
ENSMUSG00000085704	4921531C22Rik	RIKEN cDNA 4921531C22 gene [Source:MGI Symbol;Acc:MGI:1913980]	3020	blue	-0.0744573	0.324654	0.0198173	0.793468	-0.398934	3.79933e-08	0.327501	8.60365e-06	-0.013988	0.853395	0.269835	0.00028113	0.0969395	0.199288	0.590344	5.26479e-18	-0.593171	3.33998e-18	2.04094	1.18103	0.924681	1.81058	0.935897	0.808616	1.1661	0.592716	0.636437	1.65348	0.720941	0.900398	1.61434	0.421024	0.895147	0.873017	1.32406	0.653742	1.8518	0.861824	0.643602	1.60683	0.418984	1.01921	1.79873	1.1169	0.990886
ENSMUSG00000027566	Psma7	proteasome subunit alpha 7 [Source:MGI Symbol;Acc:MGI:1347070]	6059	blue	0.00866409	0.908878	-0.0451279	0.550883	-0.476013	2.13857e-11	0.319073	1.50058e-05	-0.0462958	0.54061	0.131893	0.0801283	0.260375	0.000465103	0.634953	2.29464e-21	-0.559356	5.85148e-16	4.51682	4.8414	4.74838	4.90086	4.49453	4.45791	4.69638	4.48266	4.73143	4.56315	4.7468	4.60433	4.87445	4.96506	4.62387	4.81839	4.79995	4.42471	4.68439	4.62225	4.41075	4.80849	4.32049	4.57654	5.04397	4.72458	4.7802
ENSMUSG00000027569	Mrgbp	MRG/MORF4L binding protein [Source:MGI Symbol;Acc:MGI:1920497]	5000	blue	0.000802099	0.991546	0.000910837	0.9904	-0.293897	7.17573e-05	0.237606	0.00145019	0.00842813	0.91135	0.230898	0.00198796	0.00976217	0.897389	0.376985	2.31563e-07	-0.380015	1.81846e-07	1.32494	1.24969	0.625319	1.14521	0.633664	1.23987	1.40767	0.595953	1.00341	1.8449	0.834383	0.877716	1.3791	0.690682	0.788307	1.11892	0.683011	0.657242	1.54912	0.990839	0.421785	1.43245	1.15136	0.696169	0.584127	0.556441	0.674816
ENSMUSG00000000827	Tpd52l2	tumor protein D52-like 2 [Source:MGI Symbol;Acc:MGI:1913564]	20824	blue	-0.125513	0.0959925	-0.0537258	0.477566	-0.490084	4.40707e-12	-0.159681	0.0337531	-0.443135	6.54986e-10	0.443666	6.21521e-10	0.182859	0.0148456	0.432621	1.81559e-09	-0.445583	5.13947e-10	1.44187	1.16983	1.18692	1.06426	1.21673	1.18944	1.39163	1.05708	1.11504	1.51968	1.21175	1.31207	1.4146	1.44366	1.18388	1.24285	1.03845	1.35154	1.30551	1.34536	1.22142	1.24623	0.947522	1.32996	1.05562	1.05209	1.1205
ENSMUSG00000038605	Samd10	sterile alpha motif domain containing 10 [Source:MGI Symbol;Acc:MGI:2443872]	3994	blue	-0.00658081	0.930725	0.00382637	0.959687	-0.488561	5.24733e-12	-0.123962	0.100203	-0.430294	2.26459e-09	0.593151	3.35036e-18	0.0107881	0.886674	0.514178	2.47928e-13	-0.529896	3.345e-14	1.84439	0.969609	1.15223	1.62569	1.25146	1.35767	1.09004	1.34296	1.03433	1.99087	0.575476	1.43491	2.0419	1.01788	1.02871	1.52915	1.33113	1.28973	1.77045	1.16094	1.27325	1.55269	1.18525	1.4914	1.29748	1.30623	1.03228
ENSMUSG00000038628	Polr3k	polymerase (RNA) III (DNA directed) polypeptide K [Source:MGI Symbol;Acc:MGI:1914255]	6493	blue	0.0121361	0.872628	0.0609801	0.420075	-0.544526	4.71316e-15	0.0275585	0.715773	-0.356323	1.12899e-06	0.669665	2.18544e-24	0.0139911	0.853362	0.621196	2.84877e-20	-0.661109	1.32283e-23	2.60197	1.89204	1.97254	2.37828	1.99016	1.74823	2.1977	1.93953	1.55299	2.50025	1.83304	2.13281	2.60138	1.87951	2.29839	2.6813	1.83367	2.32175	2.79363	1.71411	1.98684	2.33458	2.20319	2.14493	1.88383	2.09145	2.10657
ENSMUSG00000031168	Ebp	phenylalkylamine Ca2+ antagonist (emopamil) binding protein [Source:MGI Symbol;Acc:MGI:107822]	8183	blue	0.00165266	0.982582	-0.0459506	0.543637	-0.654474	5.13478e-23	0.212513	0.00451443	-0.26999	0.000278779	0.421821	4.99301e-09	0.225415	0.002556	0.789541	5.92952e-39	-0.734965	2.44584e-31	1.671	1.89254	1.54734	1.80692	1.6989	1.7173	1.83637	1.45949	1.50677	2.3103	0.968627	1.41308	2.32822	1.52405	1.26074	2.1628	1.25542	1.46624	2.61737	1.4905	1.51976	2.19735	1.38779	1.17835	2.18843	1.52065	1.5694
ENSMUSG00000031169	Porcn	porcupine O-acyltransferase [Source:MGI Symbol;Acc:MGI:1890212]	12677	blue	0.0353673	0.640254	0.0564464	0.455519	-0.265223	0.000360168	0.14358	0.0565778	-0.166458	0.0268036	0.600923	9.36815e-19	-0.283902	0.00012845	0.606013	3.98945e-19	-0.598378	1.42736e-18	1.47563	1.58145	1.85227	2.07934	1.59941	1.75369	2.16899	1.90441	1.40663	1.7953	1.10986	1.70967	1.87431	1.34134	1.87293	1.78368	1.41775	1.73186	1.98918	1.52717	1.77014	1.80643	1.33646	1.62257	1.93423	1.46647	1.61823
ENSMUSG00000008035	Mid1ip1	Mid1 interacting protein 1 (gastrulation specific G12-like (zebrafish)) [Source:MGI Symbol;Acc:MGI:1915291]	4677	blue	-0.0843131	0.264528	0.0388542	0.607634	-0.576223	4.79186e-17	0.125111	0.0970697	-0.374495	2.81924e-07	0.819651	3.34052e-44	-0.150375	0.0457377	0.889259	2.41402e-61	-0.898908	1.28014e-64	5.2407	4.09085	4.25525	5.16253	3.82451	4.35127	5.17729	4.62824	3.6998	5.52462	3.82635	4.49103	5.24395	3.62977	4.43648	5.39789	3.92985	4.44968	5.14001	4.04274	4.50215	5.28462	3.54377	4.46639	5.42548	3.43446	4.38491
ENSMUSG00000044148	1810030O07Rik	RIKEN cDNA 1810030O07 gene [Source:MGI Symbol;Acc:MGI:1916405]	18789	blue	0.00932729	0.901937	-0.0220152	0.771164	-0.158543	0.0350589	0.273286	0.000232883	-0.0408821	0.589009	0.603273	6.32866e-19	-0.432951	1.75925e-09	0.604707	4.97363e-19	-0.623064	2.03824e-20	1.61017	1.22927	1.48043	1.26952	0.948219	1.55224	1.40035	1.4264	1.01787	1.17932	1.13636	1.67841	1.3574	1.06307	1.53959	1.25158	1.08943	1.64117	1.71526	0.873438	1.44201	1.63053	1.23518	1.65331	1.58129	1.08894	1.61504
ENSMUSG00000000787	Ddx3x	DEAD box helicase 3, X-linked [Source:MGI Symbol;Acc:MGI:103064]	13082	blue	0.0660483	0.382421	0.0346227	0.647313	-0.482969	9.88354e-12	0.214535	0.00413811	-0.25432	0.000635771	0.684548	8.23359e-26	-0.176901	0.0185002	0.823061	7.37778e-45	-0.822113	1.12645e-44	5.22728	4.52367	4.69629	4.93742	4.101	4.59462	4.88211	4.47189	4.00939	4.5418	4.07579	4.55862	4.87877	4.16171	4.59356	4.74337	4.45572	4.57857	5.26615	4.29863	4.63449	5.29696	4.42356	4.83073	5.27696	4.24701	4.79734
ENSMUSG00000025040	Fundc1	FUN14 domain containing 1 [Source:MGI Symbol;Acc:MGI:1919268]	15761	blue	-0.0211694	0.779726	0.0251563	0.739614	-0.595805	2.1767e-18	0.15665	0.0373237	-0.340195	3.60621e-06	0.807257	6.25812e-42	-0.12844	0.0884289	0.856578	3.65209e-52	-0.883244	1.88068e-59	2.9195	2.22997	2.26934	2.941	1.99069	2.16738	2.949	2.61527	1.84921	2.922	2.16285	2.50654	3.14479	1.62193	2.62599	2.97286	2.12481	2.49823	3.05892	1.89321	2.2757	2.84278	1.94152	2.274	2.79997	1.6958	2.30315
ENSMUSG00000031060	Rbm10	RNA binding motif protein 10 [Source:MGI Symbol;Acc:MGI:2384310]	33398	blue	0.00746937	0.9214	-0.10886	0.149213	-0.285167	0.000119471	0.342415	3.08519e-06	0.0951276	0.207856	-0.19427	0.00956921	0.370021	3.99885e-07	0.37828	2.08898e-07	-0.256614	0.00056527	1.12636	0.812601	1.05114	0.896643	1.01314	0.926324	1.08741	1.0722	1.2039	1.13528	1.23157	0.990838	1.1365	1.07255	0.996506	1.03747	0.913653	0.80155	1.20846	0.897047	0.96273	1.04523	0.817047	0.981792	1.24486	1.22572	0.879145
ENSMUSG00000001127	Araf	Araf proto-oncogene, serine/threonine kinase [Source:MGI Symbol;Acc:MGI:88065]	62705	blue	-0.0914707	0.225951	0.0853136	0.25888	-0.497347	1.8952e-12	0.0394489	0.602146	-0.252501	0.00069735	0.609265	2.29379e-19	-0.00596039	0.937242	0.539719	9.06726e-15	-0.609088	2.36432e-19	1.40618	0.300944	0.362364	0.670692	0.321	0.283532	0.709384	0.362315	0.247242	1.67248	0.409065	0.503209	0.866109	0.334724	0.403808	1.34962	0.311971	0.254908	1.28589	0.351121	0.272139	0.848445	0.314347	0.384009	0.510489	0.39943	0.285408
ENSMUSG00000016534	Lamp2	lysosomal-associated membrane protein 2 [Source:MGI Symbol;Acc:MGI:96748]	55097	blue	-0.0225604	0.765658	0.0621909	0.410889	-0.51733	1.67294e-13	0.333369	5.7837e-06	-0.147131	0.0506744	0.68085	1.8935e-25	-0.128631	0.0879522	0.866742	9.36866e-55	-0.894251	5.34154e-63	1.56735	0.84152	0.981761	1.58168	0.80795	1.28183	1.52024	1.2014	0.790292	1.6493	0.957255	1.17248	1.5224	0.919596	1.35876	1.56548	0.951666	0.950209	1.58614	0.989577	1.09776	1.67837	0.735485	1.26164	1.37876	0.907315	1.0432
ENSMUSG00000048970	C1galt1c1	C1GALT1-specific chaperone 1 [Source:MGI Symbol;Acc:MGI:1913493]	4302	blue	-0.0123493	0.870409	-0.0223641	0.76764	-0.361973	7.40121e-07	0.0856777	0.256846	-0.230549	0.00202034	0.365284	5.7569e-07	0.0698783	0.355375	0.533602	2.05455e-14	-0.498362	1.68172e-12	3.11334	2.44586	2.3322	2.90956	2.39868	2.87399	2.75785	2.84446	2.85359	2.86331	2.53064	2.74812	3.11272	2.52553	2.78974	2.77337	2.60929	2.57607	3.37335	2.90741	2.34437	2.96749	2.73932	2.83329	2.72417	2.49812	2.648
ENSMUSG00000025860	Xiap	X-linked inhibitor of apoptosis [Source:MGI Symbol;Acc:MGI:107572]	49977	blue	0.0883969	0.241999	0.0452168	0.550097	-0.710167	1.79813e-28	0.146709	0.0513482	-0.342994	2.96151e-06	0.66862	2.73171e-24	0.0658709	0.383703	0.778384	3.19413e-37	-0.809608	2.38893e-42	2.20609	1.71468	1.57853	2.0219	1.60478	1.46455	2.17093	1.48077	1.36446	2.19094	1.55535	1.64434	2.13145	1.53825	1.6558	2.12091	1.76889	1.64898	2.15998	1.43067	1.84078	2.11183	1.50218	1.52713	1.74287	1.746	1.64346
ENSMUSG00000037086	Prr32	proline rich 32 [Source:MGI Symbol;Acc:MGI:1916050]	1887	blue	0.0227869	0.763376	0.107854	0.153031	0.18287	0.0148398	0.312057	2.35449e-05	0.2138	0.00427143	0.339118	3.8882e-06	-0.544255	4.89141e-15	0.304206	3.84637e-05	-0.343141	2.93096e-06	0.99791	0	1.10439	1.92961	0	2.00249	1.58063	2.34077	0	1.71791	0	1.07691	0	0.625128	1.90769	0	0	0	1.91999	0.522083	0.378437	0.494948	0	2.56804	1.21571	0.69913	0.396218
ENSMUSG00000067925	Rtl8a	retrotransposon Gag like 8A [Source:MGI Symbol;Acc:MGI:1913408]	1194	blue	-0.0101862	0.892959	0.0578257	0.444564	-0.499291	1.50683e-12	0.0186796	0.805082	-0.362117	7.32092e-07	0.737588	1.16511e-31	-0.119402	0.113431	0.644253	3.88569e-22	-0.686636	5.11707e-26	2.70385	0	1.49446	2.06059	0.823604	1.27837	2.05192	1.65161	0	2.6843	0	1.21108	1.99271	0	2.01599	2.72427	0	1.55248	2.22243	1.24987	0.962015	1.55603	0.889352	1.20074	2.71672	0	0.584473
ENSMUSG00000057615	Ldoc1	regulator of NFKB signaling [Source:MGI Symbol;Acc:MGI:2685212]	1458	blue	0.068186	0.367175	-0.052476	0.487883	-0.616266	6.81776e-20	0.267437	0.000319966	-0.22076	0.00314978	0.492085	3.49976e-12	0.0943726	0.211504	0.80801	4.60349e-42	-0.775484	8.66962e-37	2.28436	0	0.8026	2.631	0	1.35426	1.83868	1.03732	0.654675	2.62894	0	0.44254	2.39794	0	0.439555	2.15205	0	0.481084	1.7665	0	0	2.65465	0	1.04505	1.94592	0	1.39846
ENSMUSG00000000838	Fmr1	fragile X messenger ribonucleoprotein 1 [Source:MGI Symbol;Acc:MGI:95564]	39422	blue	0.104305	0.167088	0.0499393	0.509187	-0.40426	2.4015e-08	0.179306	0.0169405	-0.0887404	0.240167	0.188275	0.0120877	0.140948	0.0613102	0.388067	9.45127e-08	-0.384852	1.22998e-07	1.65433	1.25016	1.36118	1.54655	1.26241	1.16209	1.48114	1.11615	1.37457	1.46128	1.42679	1.42557	1.69321	1.31019	1.12803	1.36245	1.417	1.4932	1.64723	1.51477	1.27579	1.52641	1.2438	1.26471	1.4602	1.1137	1.34659
ENSMUSG00000073131	Vma21	VMA21 vacuolar H+-ATPase homolog (S. cerevisiae) [Source:MGI Symbol;Acc:MGI:1914298]	23833	blue	-0.0525463	0.4873	-0.0216372	0.774987	-0.733137	4.08033e-31	0.139473	0.0641004	-0.421366	5.20639e-09	0.723615	5.48455e-30	0.0798982	0.290449	0.943157	1.21267e-85	-0.93367	5.855e-80	2.25986	1.61147	1.68175	2.61266	1.36807	1.70563	2.6832	1.80299	1.2234	2.52572	1.18474	1.56296	2.6294	1.37229	1.57671	2.70353	1.44088	1.61263	2.75092	1.48295	2.0311	2.53502	1.13464	1.71237	2.68038	1.09455	1.48631
ENSMUSG00000031375	Bgn	biglycan [Source:MGI Symbol;Acc:MGI:88158]	12331	blue	0.00627854	0.9339	-0.0223893	0.767385	-0.0696554	0.356915	0.477691	1.77798e-11	0.284126	0.00012682	-0.0539308	0.475884	0.0183711	0.808237	0.394825	5.38348e-08	-0.36399	6.35298e-07	1.10057	0.319984	0.65259	0.690818	0.605767	1.13513	0.630801	0.582789	0.421694	1.36551	0.482243	0.593942	1.0071	0.73462	0.881506	0.804618	0.386141	0.408805	0.995771	0.737469	0.544964	1.0015	0.580329	1.27801	0.959385	0.653064	0.903482
ENSMUSG00000031376	Atp2b3	ATPase, Ca++ transporting, plasma membrane 3 [Source:MGI Symbol;Acc:MGI:1347353]	67919	blue	0.0924103	0.221198	-0.0275871	0.715491	0.0191934	0.799832	0.230422	0.00203227	-0.00628496	0.933832	0.522248	8.98041e-14	-0.531621	2.66799e-14	0.504485	8.10843e-13	-0.508638	4.90284e-13	1.3899	1.14141	1.78425	1.62539	1.26751	2.06451	1.74218	2.08087	1.15084	1.16378	1.11596	2.02676	1.63621	0.882692	2.17299	1.58327	1.23166	1.6197	1.64488	1.11301	1.44181	1.77003	1.1268	2.03994	1.79665	1.11148	1.83351
ENSMUSG00000019558	Slc6a8	solute carrier family 6 (neurotransmitter transporter, creatine), member 8 [Source:MGI Symbol;Acc:MGI:2147834]	9352	blue	-0.0293373	0.698293	-0.19943	0.00778563	-0.359296	9.04981e-07	0.0170322	0.821972	-0.22387	0.00274082	0.149234	0.0474256	0.267112	0.000325589	0.365297	5.75136e-07	-0.308693	2.91054e-05	2.17659	2.27713	2.02672	2.13795	1.98133	1.94545	2.25589	1.85805	1.73455	1.77628	2.22139	2.02795	2.23553	2.336	1.71226	2.16691	1.99798	1.81963	2.38221	2.20388	1.79962	2.28726	1.97753	2.07222	1.6484	2.05147	2.19258
ENSMUSG00000002015	Bcap31	B cell receptor associated protein 31 [Source:MGI Symbol;Acc:MGI:1350933]	29997	blue	-0.0598507	0.428751	0.0863117	0.25333	-0.598555	1.38628e-18	0.126402	0.0936426	-0.313429	2.15794e-05	0.593788	3.02193e-18	0.024896	0.742213	0.748213	5.26333e-33	-0.752564	1.4155e-33	1.44621	1.13711	1.14523	1.4946	0.91733	1.08135	1.4743	1.16653	1.3735	1.6436	0.86061	1.03347	1.59281	0.967374	1.1225	1.46359	0.951254	0.958014	1.19181	1.04944	1.29444	1.39066	0.938113	1.11876	1.3044	0.985931	1.06591
ENSMUSG00000015289	Lage3	L antigen family, member 3 [Source:MGI Symbol;Acc:MGI:1913442]	2342	blue	0.0785998	0.298385	0.0454187	0.548316	-0.561784	4.11747e-16	0.249839	0.000797412	-0.248415	0.000856219	0.578344	3.46206e-17	0.0179573	0.812476	0.825234	2.76924e-45	-0.808756	3.3913e-42	3.10973	2.85005	2.608	3.37548	2.86385	3.31674	3.53452	2.91681	2.40328	3.59319	3.09142	3.10412	3.87506	2.16859	3.20233	3.41276	3.18256	3.33867	3.69646	2.72706	2.86458	3.5301	2.73315	3.01109	3.92677	2.59069	3.4164
ENSMUSG00000031403	Dkc1	dyskeratosis congenita 1, dyskerin [Source:MGI Symbol;Acc:MGI:1861727]	13923	blue	-0.00553971	0.941663	-0.209599	0.00511113	-0.497895	1.77688e-12	0.279434	0.000165489	-0.0256971	0.734224	-0.37053	3.84403e-07	0.732392	5.01995e-31	0.397135	4.42841e-08	-0.250383	0.000775948	2.43082	2.44717	2.45452	2.81518	2.96344	2.46561	2.77159	2.1901	2.50858	2.39692	3.05516	2.13206	2.71327	2.99693	2.40311	2.79738	2.72227	2.40884	2.48311	2.82514	2.43035	2.72298	2.64681	2.22495	3.00906	2.47596	2.4015
ENSMUSG00000031198	Fundc2	FUN14 domain containing 2 [Source:MGI Symbol;Acc:MGI:1914641]	14060	blue	-0.0795548	0.292534	-0.0553867	0.464038	-0.530421	3.12309e-14	0.0444625	0.556778	-0.320195	1.39486e-05	0.248878	0.000836701	0.370489	3.85631e-07	0.55499	1.09322e-15	-0.483818	8.98415e-12	2.78412	2.77096	2.36948	2.81416	2.75552	2.67981	2.65325	2.85212	2.73493	2.34243	2.80475	2.74325	2.83522	2.48174	2.75745	2.74742	3.09361	2.66348	2.50357	2.84861	2.8316	2.57133	2.53038	2.61105	2.56336	2.39722	2.60647
ENSMUSG00000047797	Gjb1	gap junction protein, beta 1 [Source:MGI Symbol;Acc:MGI:95719]	9251	blue	-0.137705	0.0675819	-0.156648	0.0373265	-0.558237	6.87431e-16	0.222591	0.00290273	-0.214722	0.00410471	0.385812	1.13729e-07	0.176177	0.0189938	0.754236	8.48156e-34	-0.703989	8.36685e-28	1.78268	0.732904	1.0396	1.68278	0.581875	1.03047	1.47867	0.68542	0.859616	1.39758	0.509188	0.646894	1.23026	0.734449	0.790584	1.62342	0.726404	0.699362	1.33024	0.917928	0.939373	1.46107	1.07045	0.833615	1.69959	0.466294	0.660117
ENSMUSG00000031311	Nono	non-POU-domain-containing, octamer binding protein [Source:MGI Symbol;Acc:MGI:1855692]	19273	blue	0.0532414	0.48155	-0.113479	0.132607	-0.285719	0.000115738	0.206447	0.00583512	-0.0844735	0.263617	0.0239157	0.752027	0.18172	0.0154913	0.506557	6.31367e-13	-0.422864	4.53533e-09	2.20544	2.06264	1.95285	1.87664	2.0523	2.13279	2.06934	1.98997	2.17596	2.12518	2.13846	1.87243	2.21598	2.04717	2.30277	2.1617	2.03645	2.05098	2.09463	1.91644	1.96615	2.19104	1.90528	2.06734	2.41043	2.16343	2.11836
ENSMUSG00000048040	Arxes2	adipocyte-related X-chromosome expressed sequence 2 [Source:MGI Symbol;Acc:MGI:1924226]	1531	blue	-0.0372511	0.62254	-0.0386657	0.609379	-0.663225	8.52072e-24	-0.115628	0.125381	-0.565732	2.31036e-16	0.665028	5.84179e-24	0.139601	0.0638536	0.749645	3.4264e-33	-0.720374	1.29578e-29	5.49961	5.18982	5.29546	5.75306	5.21032	5.02245	5.97361	4.988	5.12542	5.99524	4.58599	5.19201	5.60408	4.82816	5.19441	5.94688	5.34157	4.81446	5.8196	4.98334	5.23258	5.67071	5.01088	5.37536	5.50956	4.72033	5.00736
ENSMUSG00000048355	Arxes1	adipocyte-related X-chromosome expressed sequence 1 [Source:MGI Symbol;Acc:MGI:1923469]	1579	blue	-0.0619682	0.41257	0.00629289	0.933749	-0.536801	1.34224e-14	0.0806704	0.285798	-0.344653	2.63299e-06	0.635737	1.98011e-21	0.00611787	0.935587	0.718053	2.38092e-29	-0.711253	1.36676e-28	4.19205	3.54419	3.49929	4.03112	2.99737	3.64374	4.0621	3.13325	2.98063	4.38111	3.0771	3.57761	3.61664	3.50719	3.75466	4.28936	3.26722	3.93102	4.49999	2.85857	3.41654	3.97022	2.46248	3.60035	4.07084	3.31351	3.62423
ENSMUSG00000047844	Bex4	brain expressed X-linked 4 [Source:MGI Symbol;Acc:MGI:3606746]	1447	blue	0.0158884	0.833748	-0.0925137	0.22068	-0.293064	7.5387e-05	0.0675941	0.371358	-0.154581	0.0399404	0.205036	0.00618799	0.175332	0.0195839	0.369732	4.0896e-07	-0.309181	2.82296e-05	3.42657	2.87741	2.64369	3.22874	2.99773	3.26705	3.50915	2.88019	2.63404	3.08143	2.82545	2.8378	3.16851	2.88076	2.75324	3.35831	2.75565	3.10051	3.64357	2.4722	2.85961	3.25392	1.93103	2.74734	3.083	3.31388	2.92496
ENSMUSG00000049536	Tceal1	transcription elongation factor A (SII)-like 1 [Source:MGI Symbol;Acc:MGI:2385317]	3496	blue	-0.0299728	0.692086	-0.000631719	0.993342	-0.442823	6.75438e-10	0.151976	0.0434534	-0.202436	0.0068885	0.528329	4.10352e-14	0.0222803	0.768486	0.639848	9.07991e-22	-0.638706	1.12884e-21	3.04713	2.17102	2.09053	2.98776	2.05486	2.63079	2.67204	2.30747	1.86173	2.96293	2.45416	2.41733	2.41286	1.86181	2.23685	2.94559	1.44993	2.72513	3.08983	1.74567	2.18954	2.97235	2.07112	2.18524	2.33491	1.88457	2.61301
ENSMUSG00000042595	Fam199x	family with sequence similarity 199, X-linked [Source:MGI Symbol;Acc:MGI:2384304]	32909	blue	0.0796603	0.291893	0.0467564	0.536586	-0.24551	0.000988719	0.39561	5.03826e-08	0.0470441	0.53408	0.384698	1.24551e-07	-0.193033	0.0100471	0.616599	6.43021e-20	-0.610583	1.82953e-19	1.29745	1.11307	0.968064	1.0417	1.06301	1.15326	1.11401	1.25292	1.26262	0.988875	1.09106	1.18421	1.14814	0.950801	1.26571	0.899007	1.11964	1.144	1.11818	0.981903	1.12874	0.919734	0.875752	1.15379	1.36023	1.02633	1.12298
ENSMUSG00000047230	Cldn2	claudin 2 [Source:MGI Symbol;Acc:MGI:1276110]	10558	blue	0.0736692	0.329816	0.059375	0.432436	0.221184	0.00309099	0.384696	1.2457e-07	0.316813	1.73712e-05	0.198732	0.00800817	-0.472372	3.18112e-11	0.292717	7.69502e-05	-0.305737	3.49913e-05	0.123143	0.100983	0.141139	1.10282	0.12043	1.8613	0.945006	2.01862	0.110099	1.01652	0	0.957491	0.946146	0	1.9823	0.636874	0	0.149667	1.61983	0	0	1.42352	0	1.84576	0.838282	0	0.293899
ENSMUSG00000042271	Nxt2	nuclear transport factor 2-like export factor 2 [Source:MGI Symbol;Acc:MGI:2147914]	12922	blue	-0.0137691	0.855664	0.0230137	0.761091	-0.677584	3.91152e-25	0.149434	0.0471262	-0.379091	1.95801e-07	0.750285	2.82546e-33	0.00468845	0.950615	0.906006	3.01486e-67	-0.907476	8.10505e-68	2.87458	1.44252	1.72651	2.55206	1.64799	1.84426	2.6265	2.01713	1.76443	2.54796	1.41497	1.69056	2.54063	1.4965	1.82044	2.67274	1.58083	1.9809	2.46991	1.71907	1.69321	2.60409	1.17639	1.83178	2.47788	1.34931	1.76552
ENSMUSG00000090122	Kcne1l	potassium voltage-gated channel, Isk-related family, member 1-like, pseudogene [Source:MGI Symbol;Acc:MGI:1913490]	1542	blue	-0.00561462	0.940876	-0.0106112	0.88852	-0.632144	3.87782e-21	0.285888	0.000114614	-0.225968	0.00249271	0.54792	2.95015e-15	0.060168	0.426304	0.879297	2.88408e-58	-0.863575	6.32846e-54	3.90999	2.57636	2.38466	3.97589	1.47937	1.97956	3.9652	2.57903	1.39448	3.52443	2.26568	2.13566	3.89181	1.86978	2.23407	3.91775	1.98002	2.45701	3.81359	1.04765	2.70168	3.64608	2.10431	2.50903	4.35201	1.71769	2.28323
ENSMUSG00000025283	Sat1	spermidine/spermine N1-acetyl transferase 1 [Source:MGI Symbol;Acc:MGI:98233]	3317	blue	-0.053255	0.481438	0.0723473	0.338591	-0.455677	1.85294e-10	0.0624492	0.408945	-0.25492	0.000616575	0.631749	4.17222e-21	-0.0324532	0.668057	0.549899	2.2397e-15	-0.585548	1.12819e-17	2.5414	1.82317	1.20698	1.71514	1.80487	1.24396	1.09265	1.43091	0.589607	2.29501	0.66922	0.961095	1.77122	0.693382	1.0676	1.91679	1.71447	1.54285	1.86387	1.16366	1.24185	2.24039	1.15526	0.698885	1.46235	0.773517	1.28593
ENSMUSG00000031342	Gpm6b	glycoprotein m6b [Source:MGI Symbol;Acc:MGI:107672]	150077	blue	-0.022763	0.763617	0.00662818	0.930228	-0.713247	8.23045e-29	0.146519	0.0516535	-0.398653	3.8916e-08	0.790664	3.91649e-39	0.0183849	0.808097	0.924111	5.00688e-75	-0.931815	6.02568e-79	3.446	2.5785	2.67504	3.45707	2.56214	2.71236	3.60587	2.80135	2.59535	3.30363	2.36409	2.7861	3.37604	2.45244	2.79523	3.51048	2.66349	2.68639	3.67844	2.60329	2.65156	3.28817	2.54808	2.75291	3.15002	2.54335	2.73957
ENSMUSG00000047213	Ythdf3	YTH N6-methyladenosine RNA binding protein 3 [Source:MGI Symbol;Acc:MGI:1918850]	33825	blue	-0.00876329	0.907839	0.062529	0.408345	-0.340729	3.47375e-06	0.200866	0.00734491	-0.19323	0.00996988	0.710861	1.50924e-28	-0.308918	2.86993e-05	0.721084	1.07445e-29	-0.727153	2.11536e-30	1.68931	1.20952	1.13947	1.34765	1.00392	1.20691	1.4851	1.40501	1.09669	1.55968	0.967164	1.48285	1.49286	1.02056	1.23332	1.4237	1.18613	1.2521	1.46483	1.19485	1.07337	1.66405	1.03777	1.31157	1.58116	1.07937	1.27987
ENSMUSG00000048106	4632415L05Rik	RIKEN cDNA 4632415L05 gene [Source:MGI Symbol;Acc:MGI:1918058]	1027	blue	0.015112	0.841763	-0.132929	0.0777635	-0.387626	9.80121e-08	0.23569	0.00158833	-0.121748	0.106465	0.273132	0.000234866	0.0737208	0.329476	0.592732	3.5854e-18	-0.538093	1.12881e-14	5.0865	4.79875	4.53531	4.99879	4.60111	4.52979	5.28709	4.92521	4.88431	4.39112	5.10264	5.11425	5.321	4.8531	4.71607	4.80198	4.61957	4.99567	4.30432	5.011	4.71975	5.21317	4.37982	4.76387	5.31762	4.27281	5.16361
ENSMUSG00000037737	Actrt3	actin related protein T3 [Source:MGI Symbol;Acc:MGI:1923902]	2866	blue	-0.0606178	0.422848	0.0303782	0.688137	-0.575349	5.47466e-17	0.143846	0.0561167	-0.243922	0.00106886	0.438338	1.04742e-09	0.15506	0.0393216	0.654911	4.70034e-23	-0.644994	3.36424e-22	1.20977	0.341526	0.648851	0.842198	0	0.481254	1.36349	0.6186	0.663827	0.461394	0.751113	0.241998	0.9494	0.440513	0.44615	0.907789	0	0	1.15192	0	0.48022	1.0551	0	0.44431	1.29355	0	0.502009
ENSMUSG00000027706	Sec62	SEC62 homolog (S. cerevisiae) [Source:MGI Symbol;Acc:MGI:1916526]	28388	blue	-0.179181	0.0170184	-0.0142748	0.850424	-0.374139	2.89927e-07	-0.05071	0.502664	-0.254519	0.000629362	0.338306	4.11451e-06	0.197112	0.00854653	0.30762	3.1125e-05	-0.287019	0.000107371	3.0515	3.02607	2.77171	2.99336	2.7715	2.81889	3.02151	2.66701	2.86437	3.007	2.64183	3.01767	2.95753	2.64695	3.00116	2.90435	3.03536	2.79827	2.89658	2.78317	2.87969	2.8594	2.64017	2.7633	2.68286	2.85967	2.61001
ENSMUSG00000027680	Fxr1	FMR1 autosomal homolog 1 [Source:MGI Symbol;Acc:MGI:104860]	50379	blue	-0.0188674	0.803161	-0.183163	0.0146775	-0.0188506	0.803333	0.453708	2.26686e-10	0.26671	0.000332675	-0.135599	0.0719288	0.0306535	0.685459	0.312957	2.22373e-05	-0.22116	0.00309428	1.61955	1.43393	1.47909	1.50288	1.36125	1.52086	1.44107	1.43596	1.376	1.27204	1.62247	1.45157	1.43026	1.43637	1.56992	1.48253	1.31458	1.39316	1.39715	1.44952	1.27903	1.35819	1.42044	1.4777	1.55187	1.34563	1.5272
ENSMUSG00000105135	Gm43667	predicted gene 43667 [Source:MGI Symbol;Acc:MGI:5663804]	1094	blue	0.0272568	0.718753	-0.0511999	0.498541	-0.300848	4.72497e-05	0.263213	0.000400681	-0.00538052	0.943337	0.226658	0.00241566	0.0390953	0.605406	0.456349	1.72922e-10	-0.427314	2.99797e-09	2.15048	1.2627	1.99117	2.70893	2.12458	1.35386	2.35644	0.553384	1.72071	0	1.88138	1.54289	2.55541	1.92844	1.94418	2.02164	2.36484	1.36874	2.72307	1.70322	1.35164	2.17941	0	2.25682	1.33389	1.05346	1.39805
ENSMUSG00000105095	8430422M14Rik	RIKEN cDNA 8430422M14 gene [Source:MGI Symbol;Acc:MGI:1925753]	821	blue	-0.134632	0.0739998	-0.0537019	0.477762	-0.455006	1.98502e-10	0.338203	4.14421e-06	0.0646305	0.392743	-0.0760852	0.314158	0.369146	4.27913e-07	0.362563	7.0787e-07	-0.343058	2.9482e-06	2.14979	0.950392	0.731916	2.70818	1.08377	0	1.50103	0.69865	1.6039	2.64672	2.19436	0	1.66304	2.24477	0	1.60362	0.942514	0	1.64758	1.58705	0.756486	1.52674	1.16323	0	1.59766	1.28281	0
ENSMUSG00000027712	Anxa5	annexin A5 [Source:MGI Symbol;Acc:MGI:106008]	26971	blue	-0.0399851	0.597215	-0.0300648	0.691189	-0.663637	7.81928e-24	0.196336	0.0088158	-0.305511	3.5485e-05	0.594365	2.75213e-18	0.0791566	0.294965	0.871872	3.81629e-56	-0.864716	3.19652e-54	1.97452	1.40391	1.31533	1.95019	1.04017	1.35433	2.0231	1.10888	0.828701	1.67924	0.846757	1.43711	1.57471	1.07066	1.36675	2.02589	1.33076	1.09354	2.17194	1.46955	1.60193	1.90646	1.04021	1.46621	2.1751	1.38631	1.11899
ENSMUSG00000102570	Gm37968	predicted gene, 37968 [Source:MGI Symbol;Acc:MGI:5611196]	3200	blue	-0.0497855	0.510494	0.085488	0.257904	-0.509747	4.2818e-13	0.258696	0.000507601	-0.113401	0.132873	0.357767	1.01428e-06	0.123014	0.102849	0.615299	8.07555e-20	-0.653607	6.11525e-23	1.61256	0	0	0.30647	0	0.235499	0.555449	0	0	0.744223	0.38504	0.408315	0.874906	0	0.216967	0.335223	0	0.239194	1.06663	0	0.234951	0.785781	0	0.216001	1.84785	0.451736	0.246557
ENSMUSG00000037111	Setd7	SET domain containing (lysine methyltransferase) 7 [Source:MGI Symbol;Acc:MGI:1920501]	45560	blue	0.162015	0.031205	0.0166413	0.825992	-0.539114	9.8388e-15	0.438015	1.0808e-09	0.0012424	0.986906	0.21129	0.00475682	0.111909	0.138084	0.672027	1.31567e-24	-0.637839	1.33104e-21	2.21874	1.76667	1.9209	2.12365	1.75729	1.79323	2.39371	1.80415	2.005	1.83204	2.01057	1.99114	2.16194	2.0591	1.90136	2.3181	1.90344	1.85674	2.18763	2.2222	2.02004	2.12871	1.83545	1.80557	2.22908	1.9891	2.01326
ENSMUSG00000102466	Gm38200	predicted gene, 38200 [Source:MGI Symbol;Acc:MGI:5611428]	2110	blue	0.0129534	0.86413	0.138463	0.0660711	-0.352655	1.47859e-06	0.419949	5.92891e-09	0.108996	0.148702	0.175524	0.0194485	0.0769621	0.308597	0.475125	2.35712e-11	-0.479274	1.49247e-11	0.53193	0	0	0.780634	0	0	1.64924	0.788443	0	0	0	0	0	0	0	0.48202	0	0.629456	0.871828	0.831788	0.342821	0.792465	0	0	1.12616	0	0.359128
ENSMUSG00000103284	3110080O07Rik	RIKEN cDNA 3110080O07 gene [Source:MGI Symbol;Acc:MGI:1920491]	1020	blue	0.0123684	0.87021	-0.0132487	0.861063	-0.539869	8.88568e-15	0.571141	1.03382e-16	0.114311	0.129772	0.164551	0.0286231	0.249126	0.000826402	0.716077	3.97733e-29	-0.702906	1.09087e-27	3.21737	0.807757	0	1.69044	0	0	2.22754	0	0	2.0624	0.970614	0	2.42229	0	0	2.5665	0	0.646854	1.44197	0	0.636799	1.33016	0	1.00963	2.09163	0	0
ENSMUSG00000102147	Gm38055	predicted gene, 38055 [Source:MGI Symbol;Acc:MGI:5611283]	2216	blue	0.150868	0.0450241	0.0193764	0.797963	-0.361891	7.44696e-07	0.525608	5.83721e-14	0.231193	0.00196094	-0.0509296	0.500813	0.256161	0.000578603	0.428938	2.57379e-09	-0.425456	3.56617e-09	1.64278	0	0.315953	1.24312	0	0	0	0	0	0.572808	0	0	0	0	0	0.462285	0	0	0	0	0	0	0.545227	0	0.808013	0	0
ENSMUSG00000102808	5430420F09Rik	RIKEN cDNA 5430420F09 gene [Source:MGI Symbol;Acc:MGI:1921741]	1798	blue	0.131069	0.0820503	0.0132113	0.861452	-0.371304	3.6195e-07	0.586884	9.13464e-18	0.255447	0.000600175	-0.0144608	0.848497	0.201477	0.00716422	0.494592	2.61644e-12	-0.476006	2.14017e-11	0	0	0	0.507139	0	0	0.876425	0.361169	0.551559	1.13846	0	0.368612	1.7964	0.650023	0	0.949401	0	0.401574	0	0	0	0.894572	0.6471	0	1.51131	0	0
ENSMUSG00000104687	Gm42899	predicted gene 42899 [Source:MGI Symbol;Acc:MGI:5663036]	2666	blue	0.016115	0.831412	0.0832221	0.270782	-0.760649	1.14516e-34	0.360173	8.47406e-07	-0.20784	0.00550455	0.563652	3.13534e-16	0.140574	0.0620076	0.897063	5.73498e-64	-0.914123	1.60249e-70	2.80713	0	0	2.39541	0.427364	0.278378	2.13164	0.253202	0	1.93961	0	0.258615	2.22343	0	0	1.36167	0	0	1.57078	0	0	1.73008	0	0	1.80582	0	0
ENSMUSG00000104735	C130075A20Rik	RIKEN cDNA C130075A20 gene [Source:MGI Symbol;Acc:MGI:2443940]	4175	blue	0.061282	0.417774	0.0317691	0.674653	-0.780987	1.28672e-37	0.443245	6.47917e-10	-0.147111	0.0507061	0.429012	2.55603e-09	0.262674	0.000412235	0.893654	8.50669e-63	-0.880302	1.4518e-58	2.46118	0	0	1.66761	0	0.183843	1.73972	0	0.263689	1.49107	0	0	1.04631	0	0.16914	1.00175	0.626533	0	1.72554	0	0.346106	1.84387	0	0.168375	1.13457	0	0.192634
ENSMUSG00000049504	Proser1	proline and serine rich 1 [Source:MGI Symbol;Acc:MGI:1919933]	18089	blue	-0.0411875	0.586227	0.0989707	0.189989	-0.367394	4.89808e-07	0.249031	0.000830315	-0.127616	0.0905087	0.601615	8.34797e-19	-0.224546	0.00265853	0.666079	4.6824e-24	-0.721088	1.07337e-29	1.35628	0.851239	1.13733	1.20034	0.492118	0.933312	1.0566	1.01286	0.720723	1.41787	0.405648	0.945561	1.41785	0.538648	1.15995	1.31077	0.809937	1.12456	1.32228	0.710873	0.808111	1.16229	0.292832	0.824915	1.33206	0.778621	1.08473
ENSMUSG00000027751	Supt20	SPT20 SAGA complex component [Source:MGI Symbol;Acc:MGI:1929651]	35959	blue	-0.000894708	0.99057	0.0282654	0.708808	-0.44437	5.79681e-10	0.610274	1.92929e-19	0.217554	0.00362833	0.137211	0.0685817	0.157118	0.036753	0.651069	1.01643e-22	-0.672069	1.30362e-24	0.856811	0.511733	0.46174	0.687776	0.268425	0.446703	0.70211	0.361178	0.381497	0.903874	0.548703	0.352263	0.918765	0.512891	0.413773	0.504868	0.569588	0.486659	0.791208	0.32388	0.428964	0.717484	0.672954	0.517208	0.818385	0.258606	0.67543
ENSMUSG00000036580	Spg20	spastic paraplegia 20, spartin (Troyer syndrome) homolog (human) [Source:MGI Symbol;Acc:MGI:2139806]	25214	blue	-0.0168976	0.823356	-0.0849505	0.26092	-0.225869	0.00250392	0.361654	7.58107e-07	0.0772713	0.306652	0.0436551	0.563971	0.067312	0.373363	0.501426	1.16949e-12	-0.430941	2.12991e-09	1.8226	1.48091	1.55415	1.59097	1.85787	1.7878	1.78395	1.67392	1.49895	1.70947	1.90935	1.82073	1.71941	1.8307	1.76968	1.73283	1.45471	1.62419	1.76393	1.72982	1.55111	1.69419	1.705	1.69343	1.68281	1.56555	1.62363
ENSMUSG00000056947	Mab21l1	mab-21-like 1 [Source:MGI Symbol;Acc:MGI:1333773]	2491	blue	0.00590638	0.93781	0.00762997	0.919715	-0.764996	2.84182e-35	0.309591	2.75116e-05	-0.281019	0.000151338	0.622252	2.35832e-20	0.115945	0.12434	0.974233	4.04016e-115	-0.963029	1.30383e-101	3.97536	0	1.06283	3.68455	0.453117	0.751332	3.95224	1.28528	0	3.85218	0	1.53162	4.18108	0.496557	1.03026	3.81812	0	0.549245	4.04148	0	0.749853	4.04454	0	0.871777	4.03228	0	0.564464
ENSMUSG00000027808	Serp1	stress-associated endoplasmic reticulum protein 1 [Source:MGI Symbol;Acc:MGI:92638]	6075	blue	-0.043171	0.568305	-0.0524403	0.48818	-0.381337	1.63508e-07	0.215511	0.00396661	-0.151493	0.0441313	0.305721	3.50265e-05	0.101397	0.179301	0.671413	1.50168e-24	-0.595785	2.18361e-18	3.8082	3.97663	3.48301	3.92717	3.8696	3.59868	3.91651	3.99876	3.78843	4.14673	4.05569	3.79948	4.29241	3.82172	3.73441	4.13208	3.6538	3.45601	4.49034	3.96599	3.68166	3.89305	3.86486	3.91862	4.24326	3.67969	3.78265
ENSMUSG00000027833	Shox2	short stature homeobox 2 [Source:MGI Symbol;Acc:MGI:1201673]	10044	blue	-0.128932	0.087207	-0.0285486	0.706024	-0.480544	1.29612e-11	0.317788	1.63106e-05	-0.100582	0.182841	0.392093	6.76892e-08	0.0580761	0.44259	0.707031	3.94389e-28	-0.690463	2.11774e-26	1.78043	0	0.216675	2.29897	0	0.225862	1.66426	0.139923	0	2.15096	0	0.143033	0.981227	0	0	0.874494	0	0	0	0	3.4336	1.58456	0	0.330309	1.40952	0	0.307443
ENSMUSG00000047557	Lxn	latexin [Source:MGI Symbol;Acc:MGI:107633]	5928	blue	0.0995207	0.187527	-0.0784466	0.299331	-0.179046	0.0171037	0.29777	5.69282e-05	0.00839942	0.91165	0.386491	1.07582e-07	-0.209681	0.0050934	0.55791	7.20412e-16	-0.532488	2.38014e-14	2.74699	2.32283	2.88882	3.07213	2.19102	2.92684	3.08381	2.72426	2.13414	2.47382	1.65381	2.65483	3.25591	2.31345	2.62496	3.15497	1.92936	2.79454	2.62524	2.16024	2.18033	3.24308	2.35621	2.71805	2.87084	1.99176	2.75158
ENSMUSG00000003382	Etv3	ets variant 3 [Source:MGI Symbol;Acc:MGI:1350926]	14749	blue	-0.0309857	0.682235	0.0852144	0.259436	-0.586555	9.62248e-18	0.25012	0.000786285	-0.181123	0.0158391	0.528645	3.93843e-14	0.0328888	0.663871	0.708441	2.77408e-28	-0.750156	2.93733e-33	1.44477	0.603138	0.968222	1.40229	0.805579	0.79156	1.18501	0.90069	0.648632	1.64328	0.845126	0.916251	1.06042	0.571161	1.04006	1.30775	0.737347	0.593243	1.2779	1.11869	1.10515	1.2713	0.568526	0.705536	1.30245	0.712107	0.978538
ENSMUSG00000004896	Rrnad1	ribosomal RNA adenine dimethylase domain containing 1 [Source:MGI Symbol;Acc:MGI:2387197]	8116	blue	0.027144	0.719868	0.0233646	0.757561	-0.405879	2.08573e-08	0.366628	5.19448e-07	0.0343073	0.650312	0.113811	0.13147	0.178228	0.017625	0.501942	1.09969e-12	-0.501962	1.09717e-12	1.77998	1.0921	1.09521	1.08394	0.842195	1.08311	1.36396	1.21625	1.0941	1.51762	1.42682	0.773498	1.51759	1.40014	0.922821	1.09388	1.0185	0.713625	1.19829	1.08077	1.08118	1.71535	0.809303	1.01356	1.08915	1.29262	1.16943
ENSMUSG00000004894	Hapln2	hyaluronan and proteoglycan link protein 2 [Source:MGI Symbol;Acc:MGI:2137300]	5833	blue	-0.049321	0.514452	-0.00129362	0.986366	-0.543413	5.48917e-15	0.308048	3.03053e-05	-0.10247	0.174721	0.302076	4.38375e-05	0.206303	0.00587026	0.685886	6.07344e-26	-0.660887	1.38507e-23	1.38562	0.608755	1.08146	1.20064	0.211113	0.256467	1.48721	0.233117	0.896267	1.41498	0.417522	0.534726	1.96249	0.433925	0.236416	0.896075	0.176009	0.672278	1.3226	0.64545	1.11394	1.13199	0.763743	0.529094	0.776597	0.488953	0.690165
ENSMUSG00000105843	Gm19439	predicted gene, 19439 [Source:MGI Symbol;Acc:MGI:5011624]	2288	blue	-0.0586919	0.43776	-0.0169358	0.822963	-0.20493	0.00621536	0.0884289	0.241828	-0.123818	0.100603	0.443793	6.13762e-10	-0.154757	0.0397123	0.439079	9.74566e-10	-0.458651	1.36322e-10	0.8658	1.22545	0.962377	1.86716	0.487212	1.57722	1.40166	1.22729	0	1.53023	0.513821	0.297209	1.11522	0	1.3723	1.67582	0.412288	0.589215	1.72082	0	1.79646	1.42637	0.530868	0.537817	1.66971	0	0.334181
ENSMUSG00000028070	Naxe	NAD(P)HX epimerase [Source:MGI Symbol;Acc:MGI:2180167]	1975	blue	-0.0102051	0.89276	-0.033145	0.661414	-0.508389	5.05373e-13	0.338445	4.07495e-06	-0.0600446	0.427255	0.176429	0.0188205	0.275325	0.000208125	0.677278	4.18404e-25	-0.604699	4.97972e-19	5.43943	4.92871	5.01422	5.71111	5.00818	5.27186	5.50822	5.17873	5.07224	5.374	5.30958	4.93933	5.43745	5.11611	5.1688	5.3815	4.91287	5.01184	5.51661	4.62913	4.99772	5.51026	5.08655	5.08629	5.74553	4.94426	5.04478
ENSMUSG00000001416	Cct3	chaperonin containing Tcp1, subunit 3 (gamma) [Source:MGI Symbol;Acc:MGI:104708]	24651	blue	-0.0548376	0.468487	-0.0463083	0.540502	-0.435873	1.32944e-09	-0.0146834	0.846194	-0.377451	2.23145e-07	0.731988	5.61596e-31	-0.119613	0.112792	0.66134	1.26108e-23	-0.666268	4.4986e-24	1.94945	1.81366	1.74631	2.02587	1.25074	1.62975	1.89253	1.75075	1.43203	1.8243	1.47867	1.61334	1.74218	1.1401	1.82745	2.02005	1.34207	1.71989	1.92834	1.48665	1.83651	1.92155	1.3611	1.70678	2.09539	1.36462	1.70044
ENSMUSG00000001418	Glmp	glycosylated lysosomal membrane protein [Source:MGI Symbol;Acc:MGI:1913318]	6290	blue	-0.00523279	0.94489	-0.016847	0.823876	-0.415587	8.81085e-09	0.087782	0.245303	-0.21636	0.00382277	0.441823	7.45258e-10	0.0302272	0.689606	0.534471	1.83083e-14	-0.536624	1.37439e-14	1.62944	1.06716	1.30238	1.769	0.664051	1.53324	1.76094	1.25239	0.949932	1.61383	1.51978	0.873529	1.76723	1.3012	1.10827	1.87242	0.566873	0.715632	1.56019	0.725995	1.77798	1.6826	1.29641	1.40236	1.57716	0.952548	1.15873
ENSMUSG00000028049	Scamp3	secretory carrier membrane protein 3 [Source:MGI Symbol;Acc:MGI:1346346]	5292	blue	0.0681054	0.367742	0.00901661	0.905188	-0.358443	9.6443e-07	0.266878	0.000329694	-0.034558	0.647927	0.226567	0.00242571	0.106085	0.15992	0.547071	3.31874e-15	-0.502991	9.70135e-13	1.72728	1.3736	1.65672	2.2391	1.35795	1.83724	2.31489	2.06676	1.45437	2.79056	1.7675	1.62155	2.46941	1.73147	2.01511	2.39796	1.36357	1.71806	2.49389	1.98333	1.99804	2.12318	1.72583	1.93818	2.39075	1.9599	1.8448
ENSMUSG00000042747	Krtcap2	keratinocyte associated protein 2 [Source:MGI Symbol;Acc:MGI:1913309]	3940	blue	-0.094353	0.211599	-0.0366512	0.628159	-0.499333	1.4994e-12	0.170138	0.0235717	-0.15585	0.0383181	0.207543	0.00557368	0.299775	5.04314e-05	0.535728	1.54897e-14	-0.456927	1.62923e-10	3.29787	2.7716	2.47098	3.27055	2.99977	2.45005	3.23132	2.82808	2.70601	3.51316	3.12131	2.49816	3.38981	2.6311	2.79313	3.5122	2.21718	2.39161	3.36934	2.77551	2.52115	2.90081	2.2067	2.30312	3.68075	2.37317	2.54691
ENSMUSG00000042737	Dpm3	dolichyl-phosphate mannosyltransferase polypeptide 3 [Source:MGI Symbol;Acc:MGI:1915813]	7721	blue	-0.128221	0.0889781	-0.0648025	0.391481	-0.633127	3.22927e-21	0.122804	0.103442	-0.355745	1.1783e-06	0.626725	1.05087e-20	0.104115	0.167866	0.848388	3.22787e-50	-0.837472	8.53813e-48	3.25235	2.22292	2.17424	2.93928	1.85561	2.43545	3.28669	2.49495	2.0513	3.37474	2.18582	2.28217	3.36897	2.19498	2.23246	3.13841	1.74529	2.22102	3.24879	2.30535	2.28838	3.00032	2.14634	2.49025	2.67517	2.39695	2.21114
ENSMUSG00000074466	Gm15417	predicted gene 15417 [Source:MGI Symbol;Acc:MGI:3642531]	9457	blue	-0.091241	0.227123	-0.0557195	0.461354	-0.651419	9.47925e-23	0.33857	4.03958e-06	-0.142484	0.0585089	0.228934	0.00217672	0.362072	7.346e-07	0.770986	3.96158e-36	-0.701034	1.72148e-27	1.06644	0.720332	0.487067	1.28779	0.473815	0.622917	0.966028	0.46319	0.695765	0.936369	0.786221	0.151461	1.08995	0.282658	0.68172	0.695606	0.713918	0.450084	0.874455	0.605983	0.564404	1.15378	0.281225	0.577107	1.2675	0.69784	0.324528
ENSMUSG00000028044	Cks1b	CDC28 protein kinase 1b [Source:MGI Symbol;Acc:MGI:1889208]	2911	blue	-0.0610899	0.419238	-0.026016	0.731052	-0.404072	2.44121e-08	0.113924	0.131085	-0.236532	0.00152617	0.56841	1.55444e-16	-0.0654261	0.38693	0.632631	3.54159e-21	-0.630143	5.61593e-21	1.19705	1.50628	0.95002	1.62359	1.17825	1.11737	0.827311	1.26641	0.364711	2.1175	0	0.925263	1.78428	0.768191	1.27929	1.84313	0.60407	1.37066	2.20464	0.646433	1.23939	1.21817	0.764863	1.16531	1.83671	0.489736	0.691201
ENSMUSG00000090005	Gm16540	predicted gene 16540 [Source:MGI Symbol;Acc:MGI:4414960]	1121	blue	-0.00210372	0.97783	0.0453927	0.548545	-0.408557	1.64885e-08	0.486979	6.28354e-12	0.157462	0.0363372	0.188597	0.0119391	0.135541	0.072051	0.555253	1.05301e-15	-0.57147	9.841e-17	2.1233	0	0	1.59782	0	0	0.740104	0.542271	0	0.973448	0	0.552788	1.7572	0.935794	0	0.804618	0	0	2.0442	0	0.589651	1.90909	0	0.546999	2.23587	0	1.04547
ENSMUSG00000104649	Gm43712	predicted gene 43712 [Source:MGI Symbol;Acc:MGI:5663849]	290	blue	-0.106151	0.159659	-0.000463894	0.995111	-0.462213	9.40164e-11	0.197679	0.00835446	-0.172427	0.0217354	0.355519	1.19808e-06	0.111871	0.138219	0.635089	2.23678e-21	-0.61857	4.54311e-20	4.56732	0	2.24542	3.14321	2.05989	1.56392	3.13309	1.4666	0	4.54518	2.95435	1.48794	4.27821	2.17919	1.48066	1.9584	0	0	2.81533	0	1.56151	4.08564	0	0	4.3978	0	1.61189
ENSMUSG00000001018	Snapin	SNAP-associated protein [Source:MGI Symbol;Acc:MGI:1333745]	3007	blue	-0.107109	0.155904	-0.106649	0.157699	-0.408002	1.73151e-08	-0.121494	0.107203	-0.362383	7.17561e-07	0.306255	3.38858e-05	0.158298	0.0353452	0.390886	7.48529e-08	-0.378132	2.11381e-07	3.65258	3.27134	3.29881	3.59481	3.91275	3.03041	3.64324	3.63183	3.46256	3.6841	3.51311	2.99324	3.34624	3.14207	3.07489	3.46218	3.50076	3.14864	3.90472	3.43968	3.12383	3.52733	3.52252	3.38587	3.62558	3.26427	3.12682
ENSMUSG00000001017	Chtop	chromatin target of PRMT1 [Source:MGI Symbol;Acc:MGI:1913761]	10542	blue	-0.0303975	0.687949	-0.00687119	0.927676	-0.590705	4.96886e-18	-0.144659	0.0547261	-0.555505	1.01602e-15	0.721092	1.07228e-29	-0.000312247	0.996709	0.690538	2.08106e-26	-0.690564	2.06857e-26	2.80304	2.60478	2.60765	2.88636	2.81068	2.71013	2.94487	2.58431	2.69603	2.73014	2.5431	2.72476	3.10329	2.1991	2.48062	3.04008	2.75351	2.67004	2.9028	2.22289	2.67101	3.07024	2.4438	2.58511	2.9755	2.26145	2.79497
ENSMUSG00000074457	S100a16	S100 calcium binding protein A16 [Source:MGI Symbol;Acc:MGI:1915110]	5897	blue	-0.0533876	0.480346	-0.0222528	0.768763	-0.660063	1.64202e-23	0.104288	0.167157	-0.34021	3.60244e-06	0.497091	1.95299e-12	0.24098	0.00123332	0.762864	5.64897e-35	-0.747664	6.19991e-33	3.11397	3.17765	2.74509	3.16396	2.88571	2.85883	3.21449	2.63321	2.7087	3.60561	2.31726	2.98609	3.01602	2.41649	2.69154	3.33404	2.64667	2.23835	3.60129	2.89107	2.71515	3.58508	2.81563	2.56267	3.13073	2.43016	2.69182
ENSMUSG00000056071	S100a9	S100 calcium binding protein A9 (calgranulin B) [Source:MGI Symbol;Acc:MGI:1338947]	3089	blue	-0.0817105	0.27961	-0.043242	0.567668	-0.391263	7.25403e-08	-0.00698699	0.926461	-0.23442	0.00168638	0.218114	0.00354026	0.252863	0.000684695	0.383834	1.33617e-07	-0.347192	2.1962e-06	0	0.319403	0	0	0.375803	0.243286	0.790566	0.221046	0.34602	0.764966	0.397133	0.421037	1.59247	0.733455	0.418176	0.62475	0.316166	0.247093	0.360046	0.616093	0.242721	0.321944	0	0	0.854328	0	0
ENSMUSG00000028145	Them4	thioesterase superfamily member 4 [Source:MGI Symbol;Acc:MGI:1923028]	22451	blue	-0.029669	0.69505	-0.130605	0.0831481	-0.288273	9.9844e-05	0.386765	1.05192e-07	0.0682285	0.366875	0.0457658	0.545261	0.235356	0.00161358	0.55759	7.54331e-16	-0.467923	5.13536e-11	1.17447	1.36089	1.01076	1.54738	1.12914	0.933444	1.09621	1.28407	1.00498	1.39821	1.15108	1.37035	1.63217	1.03452	1.33723	1.05741	1.03214	1.05626	1.09157	1.01874	1.0418	1.44358	1.21074	1.34617	1.31158	1.208	1.3898
ENSMUSG00000044505	Lingo4	leucine rich repeat and Ig domain containing 4 [Source:MGI Symbol;Acc:MGI:2444651]	5984	blue	0.0149284	0.843661	-0.102159	0.176038	-0.717437	2.79488e-29	0.348679	1.97344e-06	-0.18863	0.0119239	0.359802	8.71359e-07	0.267381	0.000320922	0.860272	4.411e-53	-0.815898	1.69853e-43	1.36297	0	0.3471	1.40346	0.386489	0.130694	0.587148	0.227675	0	0.444668	0.218572	0.120974	1.02892	0.227771	0.120066	0.98488	0.325341	0.13282	1.11811	0.185863	0.648453	1.02324	0	0.22988	1.25712	0	0.137063
ENSMUSG00000104631	Gm43774	predicted gene 43774 [Source:MGI Symbol;Acc:MGI:5663911]	877	blue	-0.0339554	0.653665	0.0156176	0.836542	-0.403689	2.52355e-08	0.567606	1.7516e-16	0.197362	0.00846145	0.113178	0.133642	0.162971	0.0302093	0.572921	7.90972e-17	-0.582725	1.75634e-17	3.26028	0	0.694787	1.84429	0	0.719827	2.40161	1.45923	0	2.83956	0	1.13333	2.33826	0	1.12718	1.94983	0	0	0.998872	0	0.718396	2.43377	0	0	2.2613	1.2275	0.748493
ENSMUSG00000019338	Zfp687	zinc finger protein 687 [Source:MGI Symbol;Acc:MGI:1925516]	8858	blue	-0.0177005	0.815109	-0.0944513	0.211122	-0.563143	3.37785e-16	0.255029	0.000613162	-0.200632	0.00741516	0.425639	3.50603e-09	0.137312	0.0683771	0.739547	6.65713e-32	-0.708816	2.52579e-28	0.801936	0.332572	0.893362	1.34427	0.698309	0.714186	1.385	0.657559	0.648125	1.50032	0.91384	0.869677	1.20502	0.429327	0.768523	1.15603	0.89098	0.605181	1.12844	0.801645	0.712763	1.03297	0.851385	0.861436	1.5252	0.734778	0.854345
ENSMUSG00000008958	Vps72	vacuolar protein sorting 72 [Source:MGI Symbol;Acc:MGI:1202305]	12029	blue	-0.103214	0.171595	-0.153779	0.0409961	-0.48948	4.72345e-12	0.0632969	0.402602	-0.301757	4.47017e-05	0.324115	1.07796e-05	0.147158	0.0506306	0.61212	1.40365e-19	-0.550558	2.04264e-15	1.63767	1.60237	1.48756	1.89039	1.65056	1.72741	1.69989	1.6638	1.41711	1.98665	1.88182	1.58573	1.43335	1.52192	1.79111	1.99716	1.52986	1.59209	1.91309	1.24367	1.55045	1.86089	1.67794	1.48777	2.40264	1.41296	1.52808
ENSMUSG00000053769	Lysmd1	LysM, putative peptidoglycan-binding, domain containing 1 [Source:MGI Symbol;Acc:MGI:1919409]	5430	blue	0.0650069	0.389986	0.0437372	0.563237	-0.236751	0.00151042	0.297171	5.90144e-05	0.00467569	0.950749	0.193859	0.00972572	-0.0164171	0.8283	0.519697	1.24158e-13	-0.459813	1.20813e-10	1.62248	1.08937	1.43221	1.08122	1.01125	0.876532	1.6844	1.43054	1.43089	2.06442	1.05771	1.10884	1.4864	1.32641	1.49423	1.34568	1.6916	1.48885	1.77352	0.540599	1.62509	1.27636	1.42588	1.16179	1.65298	1.2017	1.62612
ENSMUSG00000038712	Mindy1	MINDY lysine 48 deubiquitinase 1 [Source:MGI Symbol;Acc:MGI:1922257]	14821	blue	0.0208987	0.782472	-0.0013025	0.986272	-0.792394	2.0574e-39	0.285076	0.000120094	-0.306903	3.25472e-05	0.583995	1.43993e-17	0.205628	0.00603771	0.965896	1.26362e-104	-0.945275	4.79621e-87	1.82335	0.741095	0.761738	1.45283	0.581248	0.545382	2.01504	0.697042	0.358916	2.04744	0.548261	0.709894	2.25729	0.568868	0.766203	2.09613	0.385596	0.627699	1.98332	0.736541	0.879799	1.89127	0.497736	0.931046	2.08932	0.110212	0.717066
ENSMUSG00000038550	Ciart	circadian associated repressor of transcription [Source:MGI Symbol;Acc:MGI:2684975]	3748	blue	-0.0933734	0.216402	0.0990378	0.189688	-0.467561	5.33807e-11	0.0637324	0.399366	-0.246907	0.000922831	0.4507	3.07709e-10	0.0643519	0.39479	0.535564	1.58316e-14	-0.551603	1.76409e-15	0.586896	0	0.901916	0.683668	1.30536	1.41429	1.26506	0.62841	0.532849	1.59325	0.606292	0.504829	0.962946	0.628643	0.501492	1.22649	0.683301	0.387288	1.52055	0.525119	1.14278	1.02167	0.859646	0.49946	1.47282	0.393883	0.966975
ENSMUSG00000015750	Aph1a	aph1 homolog A, gamma secretase subunit [Source:MGI Symbol;Acc:MGI:2385110]	4319	blue	0.0515248	0.495815	-0.0770636	0.307957	-0.459311	1.27287e-10	0.149309	0.047313	-0.192949	0.0100806	0.340555	3.51649e-06	0.129421	0.0860034	0.602391	7.33494e-19	-0.560019	5.31779e-16	2.23357	1.72426	1.46398	2.42866	1.91328	1.9103	2.27127	1.85013	2.16654	2.45983	1.09303	1.77559	2.84366	1.8506	2.04483	2.39606	2.05461	1.64974	2.39438	1.87462	1.74793	2.07678	1.93644	2.08098	2.38886	1.24008	1.85744
ENSMUSG00000038526	Car14	carbonic anhydrase 14 [Source:MGI Symbol;Acc:MGI:1344341]	6923	blue	0.00143274	0.9849	-0.00356086	0.962482	-0.1203	0.110725	0.398531	3.93226e-08	0.14701	0.0508671	0.387356	1.00209e-07	-0.293325	7.42336e-05	0.560452	4.99512e-16	-0.577326	4.04758e-17	1.72689	0.914247	1.06845	1.76841	0.845285	1.88934	1.80585	2.08771	1.06244	1.59848	1.09163	1.37168	1.88679	1.02488	1.76572	1.49241	1.06575	1.00019	2.26136	0.439935	1.52622	1.5888	0.66722	1.93992	1.91217	0.422134	1.19673
ENSMUSG00000015745	Plekho1	pleckstrin homology domain containing, family O member 1 [Source:MGI Symbol;Acc:MGI:1914470]	7572	blue	-0.0352868	0.641015	0.0259248	0.731959	-0.90425	1.40746e-66	0.104018	0.168263	-0.446925	4.49621e-10	0.465994	6.30715e-11	0.445634	5.11356e-10	0.845574	1.41659e-49	-0.805594	1.22689e-41	2.94657	1.77665	1.40491	2.48569	2.13715	1.3638	2.93521	1.59762	1.99477	2.6827	2.24761	1.77373	3.18673	2.13058	1.67568	3.18105	1.72201	1.61244	3.23905	1.61568	1.79352	2.95076	1.65556	1.39952	3.00563	1.66695	1.71551
ENSMUSG00000068856	Sf3b4	splicing factor 3b, subunit 4 [Source:MGI Symbol;Acc:MGI:109580]	5232	blue	-0.0750774	0.320629	0.0883815	0.242082	-0.181848	0.0154172	0.117107	0.120587	-0.104648	0.165687	0.472271	3.2162e-11	-0.251182	0.000745378	0.430859	2.14658e-09	-0.455029	1.9805e-10	2.45819	2.30754	2.11048	2.45614	1.71539	2.29401	2.24307	2.1761	1.69618	2.23756	1.69827	2.29325	2.29578	2.45915	2.42421	2.68693	2.11342	1.95147	2.46434	2.10516	2.15756	2.65854	1.89654	2.1562	2.31469	1.79648	2.28559
ENSMUSG00000068855	H2ac20	H2A clustered histone 20 [Source:MGI Symbol;Acc:MGI:2448316]	519	blue	0.0201715	0.789861	0.0106079	0.888555	-0.301591	4.51566e-05	0.386664	1.06065e-07	0.0840432	0.266066	0.141159	0.0609182	0.0679703	0.368696	0.498962	1.56668e-12	-0.45761	1.5183e-10	2.20955	0	2.37337	1.97033	0	2.09754	1.96184	1.57094	2.07946	0	2.25463	1.00612	0	0	1.00044	2.07914	0	0	1.42608	1.37035	1.66949	1.31501	0	0	1.3801	0	1.10375
ENSMUSG00000068854	H2bc21	H2B clustered histone 21 [Source:MGI Symbol;Acc:MGI:2448415]	2619	blue	-0.0381153	0.614486	0.00429281	0.954778	-0.328428	8.08513e-06	0.0931787	0.217365	-0.240344	0.00127178	0.660159	1.60971e-23	-0.256127	0.000579587	0.624599	1.54544e-20	-0.640088	8.6722e-22	2.50328	1.46138	1.61899	1.29037	1.26534	1.56064	2.24177	1.46343	0.970173	1.95862	0.458126	1.48475	2.02028	1.11922	2.06095	1.83058	1.2898	1.57678	2.3254	1.17417	1.66039	2.27305	0.829578	1.98553	2.74791	1.23128	1.24264
ENSMUSG00000038393	Txnip	thioredoxin interacting protein [Source:MGI Symbol;Acc:MGI:1889549]	3926	blue	0.0595745	0.430889	0.125503	0.09602	-0.378693	2.02124e-07	-0.0649498	0.390404	-0.265245	0.000359746	0.470903	3.72892e-11	-0.0348766	0.644902	0.341912	3.19666e-06	-0.401109	3.15335e-08	1.13627	1.73975	1.25214	2.09744	1.26588	1.10849	2.0887	1.85022	0.278893	2.50513	1.80459	1.22231	2.27845	2.29576	1.44339	2.06971	1.45156	0.371805	2.61583	2.43324	1.37059	2.24414	2.03936	1.03783	1.82485	2.1032	0.684939
ENSMUSG00000038374	Rbm8a	RNA binding motif protein 8a [Source:MGI Symbol;Acc:MGI:1913129]	3858	blue	-0.156767	0.0371802	-0.180585	0.0161586	-0.408232	1.69681e-08	-0.0837018	0.26802	-0.359337	9.0221e-07	0.104457	0.166464	0.431551	2.01022e-09	0.44251	6.96538e-10	-0.31107	2.5064e-05	4.5202	4.74386	4.38051	4.81203	4.61981	4.77994	4.86991	4.75406	4.59821	4.36441	4.78874	4.72084	4.7577	4.7688	4.56978	4.81353	4.73874	4.57804	4.63409	4.68588	4.4676	4.56196	4.59774	4.61138	4.70114	4.38013	4.56828
ENSMUSG00000028101	Pias3	protein inhibitor of activated STAT 3 [Source:MGI Symbol;Acc:MGI:1913126]	9686	blue	0.0719796	0.341058	0.0293438	0.69823	-0.260193	0.000469546	0.070175	0.353331	-0.213223	0.00437885	0.655649	4.04825e-23	-0.335927	4.85171e-06	0.553855	1.28405e-15	-0.584353	1.36132e-17	1.73597	1.22869	1.29653	2.12508	0.962708	1.74123	1.86298	1.7778	0.964108	2.11949	1.14582	1.32945	1.59469	0.798764	1.67727	1.73693	1.35771	1.78353	1.70489	0.819268	1.46098	1.92245	1.03611	1.00993	1.65404	1.22417	1.379
ENSMUSG00000104693	Gm42941	predicted gene 42941 [Source:MGI Symbol;Acc:MGI:5663078]	1320	blue	-0.0751817	0.319956	0.0898263	0.23444	-0.574052	6.66546e-17	0.365585	5.62589e-07	-0.0317248	0.675081	0.173478	0.020935	0.266102	0.000343677	0.590521	5.11796e-18	-0.589752	5.78849e-18	0	0	0	1.10268	0	0	1.09659	0	0.70867	0.862565	0.800386	0	0.74317	0.828071	0	0	0	0.906384	0.734097	0.698948	0	1.11779	0	0	0	0	0
ENSMUSG00000048540	Nhlh2	nescient helix loop helix 2 [Source:MGI Symbol;Acc:MGI:97324]	5416	blue	0.0160768	0.831806	-0.0110965	0.883457	-0.688569	3.2827e-26	0.352727	1.47088e-06	-0.208866	0.00527199	0.50944	4.44529e-13	0.146146	0.0522576	0.9264	3.79939e-76	-0.886363	2.02683e-60	1.70404	0.359162	0.263457	1.75586	0	0.793565	1.33692	0.249596	0.549696	1.48278	0	0.133093	1.98411	0	0.132098	1.6616	0	0.278694	1.38777	0	1.0321	0.891861	0	0.738107	1.2524	0	0.411806
ENSMUSG00000005687	Bcas2	BCAS2 pre-mRNA processing factor [Source:MGI Symbol;Acc:MGI:1915433]	7511	blue	-0.0844224	0.263907	0.0389742	0.606525	-0.626803	1.03606e-20	0.161687	0.031553	-0.269992	0.000278751	0.601712	8.21409e-19	0.0965239	0.20123	0.742531	2.81122e-32	-0.749957	3.11973e-33	2.73039	1.78493	1.87683	2.30233	2.02127	1.83531	2.51144	1.8154	1.7876	2.8733	2.21695	1.99874	2.36312	1.24034	2.03961	2.71634	1.59232	1.65591	2.61577	1.14077	1.92145	2.54414	1.89138	1.67893	2.60757	1.06801	1.49889
ENSMUSG00000104925	Gm43061	predicted gene 43061 [Source:MGI Symbol;Acc:MGI:5663198]	2240	blue	0.0795397	0.292626	0.065146	0.388971	-0.140732	0.0617114	0.527296	4.69291e-14	0.325466	9.85531e-06	0.00348429	0.963289	-0.0253716	0.737467	0.329138	7.70785e-06	-0.348376	2.01699e-06	1.4222	0	0.31291	0.420198	0.496045	0	1.00457	0.296704	0	0.567734	0.906113	0	0.482425	0	0	0.458041	0.419952	0	0	0.794626	0	1.02455	0	1.10678	1.69076	0	0.340559
ENSMUSG00000104764	Gm43066	predicted gene 43066 [Source:MGI Symbol;Acc:MGI:5663203]	1259	blue	-0.0192005	0.799759	0.0706293	0.350216	-0.599975	1.09638e-18	0.295887	6.37338e-05	-0.130132	0.0842798	0.296355	6.19771e-05	0.246909	0.000922736	0.663638	7.81812e-24	-0.680233	2.17334e-25	1.31873	0	0.516962	1.48784	0	0.536729	1.13333	0	0	1.44139	0	0	1.93583	0	0	1.58232	0	0.938628	1.25761	0	0.535597	1.50602	0.854665	0	2.49192	0	0
ENSMUSG00000008730	Hipk1	homeodomain interacting protein kinase 1 [Source:MGI Symbol;Acc:MGI:1314873]	51748	blue	0.0985065	0.192086	0.0567738	0.452905	-0.518291	1.48262e-13	0.323136	1.15004e-05	-0.170035	0.0236575	0.670417	1.86036e-24	-0.202698	0.00681475	0.855683	6.03802e-52	-0.865494	1.99992e-54	2.10116	1.95776	1.98809	2.27774	1.74185	1.89926	2.40546	1.96564	1.74943	2.26268	1.58741	1.92283	2.27294	1.68482	1.84768	2.23887	1.77115	1.93407	2.26521	1.71091	1.80925	2.30885	1.65244	1.87446	2.30877	1.62845	1.93494
ENSMUSG00000105229	Gm43149	predicted gene 43149 [Source:MGI Symbol;Acc:MGI:5663286]	1421	blue	0.0527893	0.485286	0.0881167	0.243501	-0.331841	6.41889e-06	0.434126	1.57241e-09	0.0949198	0.208856	0.279025	0.000169331	-0.0530105	0.483456	0.546869	3.41259e-15	-0.570939	1.06565e-16	1.21667	0	0	1.04682	0	0.484705	1.04094	0	0	1.33355	0	0.45243	1.17115	0.78258	0.791539	1.46839	0	0.491697	2.02893	0.659027	0	0.626192	0.779205	0.788617	0	0	0
ENSMUSG00000104874	Gm43387	predicted gene 43387 [Source:MGI Symbol;Acc:MGI:5663524]	1065	blue	0.0617447	0.41426	0.059293	0.433073	-0.303104	4.11621e-05	0.366299	5.32691e-07	0.0807091	0.285566	0.145604	0.0531458	0.0896259	0.23549	0.404916	2.26838e-08	-0.3971	4.44156e-08	1.86792	0	0.594012	1.27637	0.89768	0	1.26968	0.565845	0	0	0	0	0	0	1.30034	0.836688	0.774557	0	0.865671	0	1.04465	1.66697	0.9676	0.978615	0.832779	1.68238	0
ENSMUSG00000027845	Dclre1b	DNA cross-link repair 1B [Source:MGI Symbol;Acc:MGI:2156057]	8839	blue	-0.135132	0.0729228	0.0456165	0.546574	-0.571799	9.36652e-17	0.221951	0.00298707	-0.210212	0.00497993	0.419498	6.17822e-09	0.13322	0.0771101	0.712211	1.07169e-28	-0.736601	1.54153e-31	0.803258	0.119827	0.515683	0.42518	0.272596	0.53541	0.819741	0.429955	0.360841	0.891723	0	0.438612	0.488027	0.430125	0.371576	0.36075	0.228054	0.40755	1.25514	0.45664	0.46904	0.837023	0.157221	0.49498	0.809762	0.340537	0.182623
ENSMUSG00000032952	Ap4b1	adaptor-related protein complex AP-4, beta 1 [Source:MGI Symbol;Acc:MGI:1337130]	12505	blue	0.0108846	0.885668	0.0444511	0.556878	-0.233981	0.00172155	0.22164	0.00302879	-0.0172473	0.819762	0.141777	0.0597856	0.0868986	0.250104	0.445073	5.40701e-10	-0.375603	2.58344e-07	0.610341	0.985096	1.02948	1.22184	1.07215	0.998726	0.783295	1.01616	0.850768	1.14355	1.01265	0.972839	1.23356	1.04539	1.21966	0.903166	0.931961	1.19668	1.22059	0.729412	0.96381	0.7479	1.15105	1.21571	0.998458	0.809594	0.966317
ENSMUSG00000104973	A530041M06Rik	RIKEN cDNA A530041M06 gene [Source:MGI Symbol;Acc:MGI:3026943]	2287	blue	0.00577011	0.939242	0.0933118	0.216706	-0.483309	9.51332e-12	0.576012	4.94846e-17	0.183077	0.0147251	0.13924	0.0645506	0.193912	0.00970544	0.631865	4.08355e-21	-0.655431	4.23083e-23	0.866085	0	0.307117	1.73037	0	0.319734	0.728667	0	0	1.74907	0	0.543724	1.11556	0	0.540175	0.449953	0.412445	0.589426	0.820277	0	0.580095	1.59747	0	0	1.29571	0.598813	0.334311
ENSMUSG00000002233	Rhoc	ras homolog family member C [Source:MGI Symbol;Acc:MGI:106028]	6084	blue	-0.115855	0.124635	-0.0713779	0.34512	-0.513195	2.80064e-13	0.333011	5.92692e-06	-0.00180904	0.980935	-0.141277	0.0606997	0.561001	4.61291e-16	0.546316	3.68385e-15	-0.4391	9.72635e-10	2.28266	2.21687	1.60931	2.3875	2.34459	1.99436	2.6578	1.94797	2.19475	2.29447	2.23282	1.44394	2.89391	2.42587	1.72451	2.50531	1.58035	1.48653	2.81655	2.086	1.73364	2.26548	2.62889	2.26984	2.72379	1.73148	1.90487
ENSMUSG00000105655	Gm42659	predicted gene 42659 [Source:MGI Symbol;Acc:MGI:5662796]	1753	blue	0.00543004	0.942816	0.0571241	0.450118	-0.422054	4.88693e-09	0.558273	6.83829e-16	0.174303	0.0203244	0.128623	0.0879737	0.186076	0.0131477	0.618085	4.94938e-20	-0.603457	6.13615e-19	1.65382	0	0.389015	2.15586	1.03469	0.404551	1.19277	1.11575	0.96735	1.79269	0	0.376938	2.60266	0.663395	0.374339	1.54099	0	0.72977	0.999283	0.955101	0	1.46583	0.660424	0.372758	2.11165	0	0
ENSMUSG00000040724	Kcna2	potassium voltage-gated channel, shaker-related subfamily, member 2 [Source:MGI Symbol;Acc:MGI:96659]	13859	blue	0.0290728	0.700882	-0.0565784	0.454464	-0.651519	9.29183e-23	0.0970702	0.198679	-0.27873	0.000172158	0.0910747	0.227975	0.422087	4.87231e-09	0.52848	4.02381e-14	-0.459389	1.26258e-10	4.37528	4.41457	4.33503	4.64961	4.61733	3.98001	4.71807	4.15015	4.65337	4.27746	4.70453	4.28304	4.50418	4.56049	4.17089	4.60365	4.67049	4.58652	4.66966	4.62573	4.52429	4.64807	4.63607	4.16435	4.49882	4.3772	4.38413
ENSMUSG00000027893	Ahcyl1	S-adenosylhomocysteine hydrolase-like 1 [Source:MGI Symbol;Acc:MGI:2385184]	33442	blue	0.0929808	0.218348	-0.0109437	0.885051	-0.308938	2.86618e-05	0.403383	2.59146e-08	0.0727797	0.335704	0.381357	1.63245e-07	-0.176288	0.0189174	0.611744	1.49789e-19	-0.618115	4.92368e-20	3.38184	3.1309	3.41539	3.64441	3.13395	3.30854	3.6049	3.43956	3.2307	3.39615	3.33674	3.55298	3.50756	3.33907	3.42029	3.66263	3.34567	3.31051	3.55278	3.42861	3.37517	3.42875	3.31425	3.47944	3.64011	3.20677	3.49241
ENSMUSG00000058135	Gstm1	glutathione S-transferase, mu 1 [Source:MGI Symbol;Acc:MGI:95860]	5718	blue	0.000513031	0.994593	-0.0422981	0.57616	-0.108273	0.151433	0.145727	0.052943	-0.0639486	0.397765	0.398549	3.92621e-08	-0.253751	0.000654467	0.476238	2.08639e-11	-0.429017	2.55465e-09	4.43068	3.66074	4.50644	4.64236	3.68879	4.33991	4.50352	4.11101	3.68489	4.44485	3.75456	4.18659	4.21553	3.83234	4.16131	4.48364	3.70544	4.09991	4.39649	3.8317	3.98615	4.43728	3.9127	4.30746	4.54873	3.96437	4.15319
ENSMUSG00000105810	Gm43435	predicted gene 43435 [Source:MGI Symbol;Acc:MGI:5663572]	1437	blue	-0.107075	0.156037	0.115453	0.125957	-0.391244	7.26552e-08	0.207112	0.00567533	-0.110194	0.144264	0.279965	0.00016061	0.128819	0.0874872	0.54916	2.48296e-15	-0.541307	7.31304e-15	1.56756	0	1.09267	0.610746	0	0.480114	0.606818	0.775564	1.11457	1.70263	0	0.448099	2.71608	0	0.445081	0.662193	0	0	1.14971	1.10107	0	1.05302	0	0.443245	2.33695	0	0.500829
ENSMUSG00000048100	Taf13	TATA-box binding protein associated factor 13 [Source:MGI Symbol;Acc:MGI:1913500]	11524	blue	0.00222919	0.976508	0.0411455	0.586609	-0.261997	0.000427209	0.0248838	0.742335	-0.176007	0.019111	0.344901	2.58692e-06	0.0148446	0.844528	0.359498	8.91363e-07	-0.36901	4.32451e-07	1.35111	1.51598	1.15321	1.8854	1.18661	1.3649	1.62597	1.47266	1.20651	1.42605	0.887071	1.21236	1.10955	1.16562	1.41542	1.33646	1.36527	1.29406	1.19643	1.65165	1.61482	1.71306	1.04246	1.36159	1.3719	1.28059	1.29223
ENSMUSG00000027881	Prpf38b	PRP38 pre-mRNA processing factor 38 (yeast) domain containing B [Source:MGI Symbol;Acc:MGI:1914171]	8922	blue	0.0175325	0.816833	-0.0322015	0.670481	-0.5203	1.15043e-13	0.487807	5.71874e-12	0.0548617	0.468291	0.0959471	0.203948	0.290451	8.79272e-05	0.671785	1.38605e-24	-0.595871	2.15332e-18	3.06713	2.7908	3.00971	3.15292	2.92475	2.82888	3.20999	2.67553	2.485	2.74199	2.59618	2.66416	3.19771	2.95748	2.7198	3.32285	2.48049	2.78362	3.17755	3.06653	2.70463	3.01756	2.929	2.71393	3.24562	2.73783	2.72574
ENSMUSG00000049300	Prmt6	protein arginine N-methyltransferase 6 [Source:MGI Symbol;Acc:MGI:2139971]	4889	blue	0.0189599	0.802215	-0.109289	0.147606	-0.359873	8.66682e-07	0.073268	0.332463	-0.275309	0.000208302	0.528576	3.97366e-14	-0.1238	0.10065	0.630421	5.33554e-21	-0.611483	1.56688e-19	2.02815	1.8095	1.52935	2.18998	1.61734	1.45463	1.97091	1.6287	1.52798	2.03315	1.37948	1.99916	2.03312	1.81227	1.4884	2.02918	1.4345	1.64367	1.655	1.23041	1.51209	2.00048	1.02914	1.31033	1.60495	0.784071	1.56159
ENSMUSG00000045092	S1pr1	sphingosine-1-phosphate receptor 1 [Source:MGI Symbol;Acc:MGI:1096355]	4639	blue	-0.0221424	0.769879	0.0747963	0.32245	-0.561913	4.04072e-16	0.113225	0.133481	-0.322221	1.22146e-05	0.850559	1.00977e-50	-0.189643	0.0114666	0.781327	1.14156e-37	-0.842071	8.5728e-49	5.53687	4.46739	4.43969	5.14098	3.66564	3.97062	5.25143	4.39687	3.99822	5.6675	3.63162	4.58599	5.48274	3.66589	4.58862	5.47523	4.1003	4.30623	5.69418	3.97463	4.13688	5.15492	3.93165	4.15566	4.88326	4.20949	4.29582
ENSMUSG00000027963	Extl2	exostosin-like glycosyltransferase 2 [Source:MGI Symbol;Acc:MGI:1889574]	21555	blue	0.0292258	0.699384	-0.0465936	0.538007	-0.776878	5.37418e-37	0.237272	0.00147344	-0.341581	3.27206e-06	0.492137	3.4789e-12	0.250022	0.000790152	0.917074	8.57538e-72	-0.862366	1.29534e-53	2.39978	1.64654	1.71832	2.31337	1.77848	1.64718	2.48581	1.79401	1.59448	2.38107	1.78755	1.90456	2.53277	1.75444	1.61917	2.69496	1.7899	1.80313	2.55453	1.68434	1.72711	2.47256	1.82764	1.91891	2.91856	1.74295	1.81468
ENSMUSG00000106415	Gm42893	predicted gene 42893 [Source:MGI Symbol;Acc:MGI:5663030]	1811	blue	-0.0291205	0.700415	0.0476121	0.529149	-0.322269	1.21758e-05	0.360679	8.15862e-07	0.0658846	0.383604	0.0785871	0.298463	0.180807	0.016026	0.474204	2.60647e-11	-0.466932	5.70805e-11	1.02783	0	0	0	0	0.956006	0.50071	0	0	0	0.623411	0.366275	0.57643	0	0	0.548134	0	0	0.976006	0	0	0.512425	0.643352	0	2.07569	0.722197	0
ENSMUSG00000053931	Cnn3	calponin 3, acidic [Source:MGI Symbol;Acc:MGI:1919244]	31710	blue	-0.0199506	0.79211	-0.0647888	0.391582	-0.255171	0.000608717	0.373677	3.00653e-07	0.0170905	0.821372	0.402982	2.68296e-08	-0.174317	0.0203135	0.702488	1.20836e-27	-0.666414	4.36261e-24	1.8041	1.79175	1.52711	1.66606	1.22243	1.71039	1.7827	1.50527	1.02131	1.93628	1.21871	1.29429	1.85148	1.21614	1.69032	1.68585	0.984475	1.01371	1.8573	0.989859	1.14645	1.58357	1.28938	1.70009	1.61941	1.1045	1.24669
ENSMUSG00000028128	F3	coagulation factor III [Source:MGI Symbol;Acc:MGI:88381]	11511	blue	-0.0676949	0.370644	0.123166	0.102419	-0.554884	1.10981e-15	0.126341	0.0938031	-0.241071	0.0012279	0.686752	4.98305e-26	-0.050116	0.507688	0.658031	2.49213e-23	-0.732591	4.74955e-31	2.14814	0.615427	0.557124	1.50704	0.213755	0.479582	1.2051	0.390704	0.36843	2.38474	0.226601	0.447597	1.51326	0.122881	0.537197	1.63634	0.259728	0.486512	2.33103	0.19277	0.259028	1.59108	0.339403	0.703617	0.900895	0.26835	0.332339
ENSMUSG00000106087	Gm43609	predicted gene 43609 [Source:MGI Symbol;Acc:MGI:5663746]	2711	blue	-0.00224352	0.976357	0.0834045	0.269729	-0.379056	1.96348e-07	0.570687	1.10664e-16	0.212986	0.00442374	0.106994	0.156353	0.10006	0.185136	0.594526	2.68103e-18	-0.615695	7.53507e-20	1.25585	0	0.485694	1.26114	0.74683	1.17363	0.636298	0	0	2.06604	0	0	1.72103	0.462055	0.467926	0.388194	0	0	1.19658	0.684367	0.273539	1.09727	0.808007	0	0.941532	0.520052	0.286869
ENSMUSG00000028124	Gclm	glutamate-cysteine ligase, modifier subunit [Source:MGI Symbol;Acc:MGI:104995]	25175	blue	0.0294135	0.697548	-0.059664	0.430196	-0.81375	4.23597e-43	0.179026	0.0171161	-0.365497	5.66405e-07	0.389969	8.07695e-08	0.37128	3.62629e-07	0.841878	9.45738e-49	-0.784739	3.39422e-38	2.06225	1.95928	1.6577	2.42283	1.83016	1.79877	2.32179	1.77302	1.94867	2.22952	1.8026	1.67042	2.36993	1.9734	1.89644	2.37554	1.78038	1.86237	2.22862	1.91763	1.76788	2.23631	2.09573	1.92296	2.33095	1.77833	1.63617
ENSMUSG00000054091	1810037I17Rik	RIKEN cDNA 1810037I17 gene [Source:MGI Symbol;Acc:MGI:1914954]	1981	blue	-0.0863206	0.25328	0.0457043	0.545802	-0.719906	1.46565e-29	-0.237252	0.00147484	-0.652355	7.86203e-23	0.700189	2.11196e-27	0.211901	0.00463433	0.633441	3.04546e-21	-0.646985	2.27937e-22	5.28509	4.84911	4.63386	4.92782	4.21969	4.29407	5.13494	4.52017	4.49539	5.29155	4.07143	4.61561	5.05868	4.08873	4.57332	5.22256	4.62572	4.60312	5.16668	4.87002	4.61043	5.02582	3.73655	4.61356	4.84376	4.59476	4.64872
ENSMUSG00000028114	Mettl14	methyltransferase like 14 [Source:MGI Symbol;Acc:MGI:2442926]	17811	blue	-0.0554628	0.463423	-0.0998562	0.186037	-0.331056	6.77051e-06	0.111593	0.139208	-0.249375	0.000816153	0.708756	2.56395e-28	-0.286121	0.000113088	0.662952	9.02126e-24	-0.685936	6.00464e-26	1.30973	1.24813	1.33519	1.45598	0.90867	1.32036	1.44874	1.2673	0.884525	1.2229	1.21351	1.17865	1.29176	1.0647	1.42821	1.40318	1.01425	1.23926	1.6158	0.908974	1.14242	1.42817	0.936756	1.27611	1.65466	0.673139	1.40094
ENSMUSG00000106001	Gm42826	predicted gene 42826 [Source:MGI Symbol;Acc:MGI:5662963]	2638	blue	0.00602606	0.936552	0.0390216	0.606087	-0.360997	7.96584e-07	0.305777	3.49062e-05	0.0493537	0.514173	0.204188	0.00640923	0.10313	0.171944	0.46047	1.12818e-10	-0.480168	1.35146e-11	1.4767	0	0.269833	0.364124	0.431284	0	0.891041	0.255665	0.709095	1.15596	0	0.261126	1.0083	0.828549	0.478942	1.18218	0.654263	0.523564	0.996958	0.391654	0.515099	1.11838	0.470702	0.476988	0.960542	0.532084	0.746943
ENSMUSG00000105586	Gm43009	predicted gene 43009 [Source:MGI Symbol;Acc:MGI:5663146]	3565	blue	-0.00799414	0.915897	0.0697305	0.356396	-0.546117	3.78612e-15	0.558517	6.60347e-16	0.0970791	0.198638	0.182597	0.0149922	0.222881	0.00286534	0.720376	1.295e-29	-0.716478	3.58542e-29	1.21378	0	0.204377	0.887356	0.330938	0.21308	1.42555	0.193419	0.304346	0.381812	0.350019	0.19764	1.16833	0	0	0.304268	0	0	0.796477	0	0.21258	0.900357	0	0	0.951134	0	0.223164
ENSMUSG00000105202	C230031I18Rik	RIKEN cDNA C230031I18 gene [Source:MGI Symbol;Acc:MGI:2445192]	3697	blue	0.165226	0.0279678	0.0908244	0.229261	-0.378727	2.01578e-07	0.578589	3.33425e-17	0.270803	0.000266742	0.0301082	0.690766	0.167312	0.026022	0.433294	1.70267e-09	-0.427688	2.89474e-09	0.593532	0.271496	0	0.495409	0	0.386209	1.01166	0	0.294516	0	0	0	0.566758	0.352557	0	0.29444	0	0.209254	1.12713	0	0.205505	0.503648	0	0	0.292801	0.39863	0
ENSMUSG00000027997	Casp6	caspase 6 [Source:MGI Symbol;Acc:MGI:1312921]	12678	blue	-0.012011	0.873929	0.0401837	0.595394	-0.300858	4.72206e-05	0.355699	1.18226e-06	0.0521792	0.490351	0.281446	0.000147727	-0.0157277	0.835406	0.560313	5.09624e-16	-0.590251	5.34343e-18	0.800785	0.380619	0.279737	0.728684	0.446261	0.577544	0.500677	0.265096	0.411651	0.749807	0.300569	0.455826	0.987126	0.215923	0.317041	0.787639	0.441687	0.711265	0.92438	0.40544	0.237036	0.572723	0.40173	0.759599	0.940077	0.245631	0.248737
ENSMUSG00000019232	Etnppl	ethanolamine phosphate phospholyase [Source:MGI Symbol;Acc:MGI:1919010]	20073	blue	0.0154998	0.837757	-0.0293711	0.697963	-0.803907	2.41212e-41	0.299917	5.00009e-05	-0.282038	0.000142843	0.457588	1.52182e-10	0.306974	3.24035e-05	0.92727	1.3945e-76	-0.879614	2.32442e-58	2.43444	0.786244	0.980422	2.36468	0.867297	0.77119	2.61551	1.15255	1.00077	1.72849	1.21205	0.790869	2.51023	0.977246	1.21378	2.08833	1.03966	0.941066	2.33824	0.797272	1.76411	2.25413	0.685625	0.846532	2.39743	0.611211	0.561086
ENSMUSG00000041084	Ostc	oligosaccharyltransferase complex subunit (non-catalytic) [Source:MGI Symbol;Acc:MGI:1913607]	13532	blue	-0.109787	0.145759	-0.0464906	0.538907	-0.267259	0.000323022	0.250726	0.000762692	-0.0586138	0.438371	0.264074	0.00038284	0.0687732	0.363053	0.532293	2.44226e-14	-0.483751	9.05196e-12	2.16224	1.91529	1.85044	1.96731	1.75591	2.12249	1.89564	1.74133	1.57529	1.89292	1.45212	2.22484	2.05489	1.45389	2.03863	1.77078	1.71948	1.79634	1.89443	1.7791	1.92686	1.90282	1.56334	1.96447	2.04797	1.6261	1.81235
ENSMUSG00000028165	Cisd2	CDGSH iron sulfur domain 2 [Source:MGI Symbol;Acc:MGI:1914256]	17513	blue	-0.0306525	0.68547	-0.0216428	0.77493	-0.485728	7.24217e-12	0.274315	0.000220058	-0.169048	0.0244922	0.555655	9.94451e-16	-0.0563221	0.456514	0.774058	1.40887e-36	-0.763119	5.20666e-35	2.21811	2.21037	2.17016	2.5035	2.20835	2.30821	2.48307	2.15258	1.91567	2.5387	2.00657	2.10017	2.31081	1.83642	2.27945	2.5894	2.1136	2.08037	2.41951	2.19238	1.94258	2.53772	2.14683	2.28273	2.37298	1.90864	1.94881
ENSMUSG00000091512	Lamtor3	late endosomal/lysosomal adaptor, MAPK and MTOR activator 3 [Source:MGI Symbol;Acc:MGI:1929467]	10394	blue	-0.0524138	0.4884	0.0467614	0.536542	-0.526591	5.14147e-14	0.216019	0.00388002	-0.233913	0.00172704	0.75339	1.09977e-33	-0.152581	0.0426154	0.770098	5.32543e-36	-0.813543	4.62466e-43	1.85791	1.02224	1.03138	1.96888	1.16225	1.10191	1.849	1.12499	0.402955	2.0049	0.646216	1.7939	1.93509	0.577545	1.51027	2.04987	0.789244	1.32136	1.78369	0.560673	1.48384	1.75602	0.91166	0.803937	1.69643	0.4218	1.44433
ENSMUSG00000104724	Gm43162	predicted gene 43162 [Source:MGI Symbol;Acc:MGI:5663299]	1769	blue	0.0719339	0.341366	0.0350313	0.643435	-0.48938	4.77775e-12	0.30141	4.56583e-05	-0.0745719	0.323908	0.32348	1.12419e-05	0.112699	0.135305	0.580921	2.32538e-17	-0.610048	2.00563e-19	1.04517	0.518766	0.385928	0.514131	1.028	0	0	0	0	1.15131	0	0	1.81315	0	0.371354	0.960759	0	0.407309	0.580131	0	0.400472	1.20771	0	0	1.52658	0	0.419146
ENSMUSG00000106057	Gm43560	predicted gene 43560 [Source:MGI Symbol;Acc:MGI:5663697]	772	blue	0.0467459	0.536678	0.116093	0.123856	-0.200895	0.00733599	0.534854	1.74013e-14	0.306541	3.32892e-05	0.0318785	0.673596	0.0338852	0.654335	0.392179	6.72056e-08	-0.402641	2.76331e-08	1.14966	0.993912	0	0	0	0	1.97084	1.57898	1.05974	2.37777	0	0	1.72437	0	0	1.05952	0.985782	0	1.70862	0	0	0	0	0	1.65771	1.33576	0.825809
ENSMUSG00000028191	Bcl10	B cell leukemia/lymphoma 10 [Source:MGI Symbol;Acc:MGI:1337994]	11552	blue	0.0143709	0.849429	0.0664191	0.37975	-0.649192	1.47546e-22	0.255781	0.000589986	-0.179786	0.0166432	0.259917	0.000476346	0.316463	1.77676e-05	0.684839	7.70759e-26	-0.686525	5.2486e-26	1.78372	1.29739	1.05674	1.43542	1.37371	1.27763	2.1317	1.49329	1.3346	2.21615	1.2362	0.66814	2.02854	1.2735	1.17552	2.04113	1.50309	0.847403	1.67725	1.19032	1.0551	1.76839	1.46568	1.6126	1.90167	1.21666	1.02328
ENSMUSG00000036873	2410004B18Rik	RIKEN cDNA 2410004B18 gene [Source:MGI Symbol;Acc:MGI:1913671]	6815	blue	-0.0517132	0.494239	-0.0356339	0.637734	-0.444663	5.63094e-10	-0.164911	0.0282718	-0.419905	5.95245e-09	0.359322	9.03185e-07	0.24315	0.00110997	0.370194	3.94555e-07	-0.344198	2.71934e-06	2.10871	2.26875	1.58028	2.47416	2.03636	2.02877	2.24755	1.66743	1.73738	1.61371	2.00588	1.85252	2.25853	1.5618	2.28875	2.30168	1.91703	1.98683	2.45864	2.35187	1.69702	1.98053	2.53073	1.95673	2.22095	1.69796	1.6324
ENSMUSG00000028037	Ifi44	interferon-induced protein 44 [Source:MGI Symbol;Acc:MGI:2443016]	19038	blue	-0.0784674	0.299202	0.078404	0.299594	-0.484535	8.28699e-12	0.242521	0.00114446	-0.129517	0.08577	0.307234	3.18834e-05	0.152714	0.0424321	0.609677	2.13733e-19	-0.644364	3.80294e-22	0.374613	0.0568734	0	0.110449	0.132986	0.162488	0.161444	0.0755074	0.178794	0.648324	0.0723344	0.0772243	0.598303	0.0755411	0	0.121589	0	0.125563	0.402675	0.119603	0.12325	0.314285	0.146541	0.148725	0.608197	0.0865152	0
ENSMUSG00000028035	Dnajb4	DnaJ heat shock protein family (Hsp40) member B4 [Source:MGI Symbol;Acc:MGI:1914285]	31791	blue	0.087454	0.247078	0.10524	0.163292	-0.412117	1.20271e-08	0.183928	0.0142614	-0.069035	0.361225	0.439905	8.99206e-10	-0.0424578	0.574719	0.390427	7.77627e-08	-0.45757	1.52458e-10	2.15779	1.65216	1.51612	1.61948	1.42059	1.59303	1.5893	1.67993	1.69538	1.79917	1.44588	1.68087	1.63154	1.70196	1.55774	1.97179	1.62996	1.85354	1.9191	1.65449	1.5991	1.80825	1.54633	1.56906	1.57953	1.54821	1.57036
ENSMUSG00000039103	Nexn	nexilin [Source:MGI Symbol;Acc:MGI:1916060]	29368	blue	-0.0310234	0.681869	-0.0637065	0.399558	-0.770008	5.48719e-36	0.201486	0.00716144	-0.259027	0.000498949	0.210605	0.00489755	0.541303	7.31768e-15	0.687303	4.39222e-26	-0.625689	1.26858e-20	0.947839	0.273248	0.127463	1.00415	0.392848	0.133041	0.842503	0.273804	0.42451	0.855296	0.678036	0.192297	0.736669	0.606648	0.256425	1.0587	0.805189	0.135203	0.61982	0.765881	1.01536	0.796032	0.42925	0.233869	0.952159	0.056672	0.165874
ENSMUSG00000038975	Rabggtb	Rab geranylgeranyl transferase, b subunit [Source:MGI Symbol;Acc:MGI:99537]	5722	blue	0.0397069	0.599771	-0.0520189	0.491686	-0.320544	1.36342e-05	0.108443	0.150788	-0.226999	0.00237844	0.605934	4.04269e-19	-0.158186	0.0354767	0.628542	7.53813e-21	-0.604915	4.80199e-19	3.39725	2.89171	3.03672	3.3597	2.27956	2.85743	3.03958	2.80507	2.89497	2.99717	2.87374	3.00783	2.85159	2.74918	2.91353	3.20036	2.74151	2.79705	2.89282	3.00825	2.75208	3.38513	2.70345	2.78052	3.0976	2.56925	2.79514
ENSMUSG00000062908	Acadm	acyl-Coenzyme A dehydrogenase, medium chain [Source:MGI Symbol;Acc:MGI:87867]	22275	blue	0.0118942	0.875145	0.0103419	0.891332	-0.237597	0.00145077	0.324043	1.08317e-05	0.0175909	0.816234	0.263873	0.000386927	-0.0462809	0.540741	0.603775	5.81713e-19	-0.557349	7.80741e-16	1.63771	1.09361	1.29949	1.77149	1.2894	1.66229	1.92594	1.61662	1.06354	1.50722	1.31853	1.39031	1.60242	1.48121	1.60958	1.5255	1.25888	1.38195	1.60602	1.30889	1.53885	1.52217	1.18857	1.66949	1.71287	1.42776	1.32155
ENSMUSG00000105803	Gm43526	predicted gene 43526 [Source:MGI Symbol;Acc:MGI:5663663]	1564	blue	0.0744202	0.324895	-0.00586687	0.938225	-0.390009	8.05063e-08	0.594965	2.49603e-18	0.263671	0.000391099	-0.0145454	0.847623	0.231193	0.00196091	0.46799	5.09866e-11	-0.46072	1.09912e-10	1.48777	0	0.760264	1.2944	0	0	0	0	0	0.757544	0	0.416477	1.71145	0.726268	0	1.04989	0.569418	0	1.42202	0	0.785551	1.57297	0.72308	0.731972	0	0	0
ENSMUSG00000105643	Gm42611	predicted gene 42611 [Source:MGI Symbol;Acc:MGI:5662748]	3406	blue	0.0488656	0.518348	0.0486298	0.520371	-0.348586	1.9867e-06	0.488225	5.45237e-12	0.16746	0.0258887	0.160798	0.0325121	0.0630935	0.404118	0.486118	6.92881e-12	-0.511126	3.61523e-13	0.351865	0.925239	0.213245	0.289673	0.344677	0	1.07249	0	0.796987	0.708622	0	0.386644	0.334741	0	0.543412	0.796811	0	0.420997	0.330081	0.312164	0.221777	0.931289	0	0.541241	0.573842	0.428085	0.232784
ENSMUSG00000042198	Chchd7	coiled-coil-helix-coiled-coil-helix domain containing 7 [Source:MGI Symbol;Acc:MGI:1913683]	12158	blue	0.0661006	0.382043	0.0308541	0.683511	-0.573529	7.21543e-17	0.198829	0.00797672	-0.216122	0.00386255	0.544806	4.53528e-15	0.0385082	0.610838	0.675583	6.07185e-25	-0.673277	1.00373e-24	1.82924	1.32832	1.1407	1.38937	0.381181	1.08411	1.74352	1.17764	1.20693	1.47342	1.03327	1.24953	1.57305	1.00727	1.13488	1.71014	1.38877	1.12869	1.44811	1.05852	1.08218	1.53886	1.06225	1.13111	1.47456	0.660519	0.874923
ENSMUSG00000045573	Penk	preproenkephalin [Source:MGI Symbol;Acc:MGI:104629]	5288	blue	-0.0228532	0.762707	0.0186922	0.804952	-0.861405	2.27918e-53	-0.111721	0.138751	-0.543357	5.53146e-15	0.408268	1.69146e-08	0.479649	1.43165e-11	0.597276	1.71095e-18	-0.597053	1.77454e-18	4.51617	2.37798	1.91465	4.61405	3.0532	2.2496	4.534	2.74559	2.77787	5.14222	3.43441	2.19009	4.75874	3.54156	2.46402	4.70973	4.41441	2.05821	4.64445	3.87699	3.19129	4.48044	3.30055	2.324	4.79409	2.71426	2.2734
ENSMUSG00000041261	Car8	carbonic anhydrase 8 [Source:MGI Symbol;Acc:MGI:88253]	95679	blue	0.00125469	0.986776	-0.0158191	0.834463	-0.879819	2.02061e-58	0.257296	0.000545744	-0.352697	1.47409e-06	0.541828	6.81376e-15	0.315708	1.86518e-05	0.973033	2.05586e-113	-0.942942	1.67094e-85	3.76818	0.382973	0.0872944	3.57672	0.119636	0.075016	3.85406	0.0969285	0.15544	3.66751	0.256267	0.113778	3.87348	0.329653	0.0613224	4.04074	0.260339	0.0926728	4.0318	0.260371	0.206391	3.76553	0.226737	0.083273	3.94306	0.229172	0.11241
ENSMUSG00000028222	Calb1	calbindin 1 [Source:MGI Symbol;Acc:MGI:88248]	26800	blue	0.00948668	0.90027	-0.00368026	0.961225	-0.866966	8.17122e-55	0.217996	0.00355868	-0.385227	1.19292e-07	0.587454	8.34593e-18	0.272335	0.00024535	0.963766	2.31203e-102	-0.938289	1.29753e-82	5.05419	2.85905	2.56051	4.85263	2.78641	2.59933	5.01676	2.63018	2.55426	4.95913	2.55933	2.61282	5.09968	2.52941	2.79679	5.1426	2.79298	2.65958	5.09297	2.92613	2.53978	5.11272	2.68488	2.3307	5.10041	2.61744	2.66467
ENSMUSG00000040520	Manea	mannosidase, endo-alpha [Source:MGI Symbol;Acc:MGI:2444484]	22385	blue	-0.0300679	0.691159	0.0716111	0.343542	-0.30397	3.90287e-05	0.110675	0.142508	-0.229868	0.00208497	0.59161	4.29652e-18	-0.223156	0.00283012	0.569756	1.27208e-16	-0.592811	3.53985e-18	1.40002	1.40133	1.37832	1.25531	1.23575	1.40468	1.54267	1.46433	1.2758	1.14162	1.06572	1.10147	1.53968	1.0367	1.2582	1.31945	1.44592	1.36319	1.50512	1.26107	1.34613	1.25097	1.34809	1.28183	1.02896	1.14334	1.30179
ENSMUSG00000085037	4933421O10Rik	RIKEN cDNA 4933421O10 gene [Source:MGI Symbol;Acc:MGI:1918323]	4181	blue	0.152821	0.0422868	0.0651022	0.38929	-0.397065	4.45466e-08	0.342054	3.1648e-06	0.0273431	0.717901	0.308605	2.92669e-05	0.0280177	0.711246	0.519689	1.24293e-13	-0.525035	6.2841e-14	0.536074	0.937682	0.474356	0.930341	0	0.62559	0.92493	0.45101	0.485955	1.02386	0.554094	0.907908	1.31569	0.794378	0.320102	1.26387	0.929879	0.351675	0.703359	0.837672	0.857748	0.24454	0	0.455062	1.13344	0	0.362091
ENSMUSG00000040128	Pnrc1	proline-rich nuclear receptor coactivator 1 [Source:MGI Symbol;Acc:MGI:1917838]	44740	blue	0.0231994	0.759222	0.043516	0.565215	-0.598768	1.33836e-18	0.0263109	0.728123	-0.396693	4.59753e-08	0.831836	1.29688e-46	-0.126165	0.0942646	0.727091	2.15145e-30	-0.784096	4.27349e-38	1.58381	0.837585	0.838541	1.24561	0.496608	0.65141	1.16531	0.996092	0.710422	1.64362	0.456221	0.834983	1.40606	0.565955	0.964815	1.82554	0.857589	0.89854	1.5255	0.633859	0.865735	1.44688	0.69079	0.759677	1.14313	0.452256	0.759727
ENSMUSG00000044288	Cnr1	cannabinoid receptor 1 (brain) [Source:MGI Symbol;Acc:MGI:104615]	24238	blue	0.05065	0.50317	0.0356098	0.637962	-0.643962	4.1117e-22	0.0672065	0.374113	-0.404201	2.4139e-08	0.820577	2.22389e-44	-0.106944	0.156545	0.801606	6.00464e-41	-0.836112	1.66136e-47	3.6604	2.39606	2.39315	3.45931	2.17849	2.60405	3.53248	2.48004	2.03877	3.30926	1.85801	2.65323	3.51839	2.14408	2.57792	3.71005	2.39142	2.48414	3.77784	1.86702	2.09393	3.67686	2.13783	2.40797	2.84356	2.25893	2.46018
ENSMUSG00000028445	Enho	energy homeostasis associated [Source:MGI Symbol;Acc:MGI:1916888]	2180	blue	-0.0446295	0.555295	-0.0800885	0.289298	-0.808617	3.59002e-42	0.190834	0.0109493	-0.349026	1.92472e-06	0.407843	1.75582e-08	0.418441	6.80317e-09	0.878524	4.86552e-58	-0.809457	2.54164e-42	5.64951	3.97711	4.12316	5.62325	3.89859	4.3406	5.6222	4.12295	4.25182	5.74199	4.78096	4.21157	5.55784	4.69382	3.93482	5.74423	3.79137	3.77674	5.54812	4.07483	4.44425	5.44333	4.49021	4.24929	5.72513	4.19149	4.05257
ENSMUSG00000036114	Rpp25l	ribonuclease P/MRP 25 subunit-like [Source:MGI Symbol;Acc:MGI:1917211]	1501	blue	-0.0596985	0.429928	-0.0213648	0.777745	-0.384182	1.29889e-07	0.0663886	0.379969	-0.142321	0.0588012	-0.0617364	0.414323	0.423003	4.47757e-09	0.299492	5.13049e-05	-0.211036	0.00480865	4.0591	3.48541	3.4752	3.53557	3.43268	3.16001	3.58655	3.39795	4.10236	3.26831	2.91101	3.28063	3.9832	4	3.32128	4.19276	3.4705	3.05391	2.16998	3.64516	2.56116	3.42973	3.19159	3.50204	3.72168	3.26643	3.02714
ENSMUSG00000035969	Rusc2	RUN and SH3 domain containing 2 [Source:MGI Symbol;Acc:MGI:2140371]	45109	blue	-0.0398574	0.598387	0.0629203	0.405412	-0.571507	9.78576e-17	0.0462345	0.541147	-0.324368	1.06008e-05	0.740461	5.11936e-32	-0.0792618	0.294321	0.661981	1.10402e-23	-0.727847	1.75153e-30	1.24881	0.267403	0.224517	0.892412	0.166406	0.202816	0.807014	0.294866	0.222866	1.38089	0.148609	0.430928	1.046	0.212647	0.201211	1.45641	0.304392	0.455216	1.33004	0.149831	0.337406	1.28578	0.266694	0.228801	0.582965	0.209765	0.212449
ENSMUSG00000028461	Ccdc107	coiled-coil domain containing 107 [Source:MGI Symbol;Acc:MGI:1913423]	3021	blue	-0.0298313	0.693466	-0.110615	0.142727	-0.542883	5.90114e-15	0.211885	0.00463758	-0.150134	0.0460903	0.132835	0.0779757	0.406982	1.89374e-08	0.563448	3.23069e-16	-0.513045	2.85327e-13	2.33581	2.2633	2.01902	2.32516	1.33417	1.85977	1.99448	1.89098	2.01744	2.30243	2.08414	1.45027	1.97978	1.89147	2.30853	2.01713	2.0023	1.54111	1.73065	2.26693	1.99911	2.2734	2.01145	2.19933	2.01044	0.83102	1.75232
ENSMUSG00000028464	Tpm2	tropomyosin 2, beta [Source:MGI Symbol;Acc:MGI:98810]	9054	blue	-0.0436028	0.564439	-0.0250535	0.740641	-0.256634	0.000564674	0.378545	2.0453e-07	0.117779	0.118457	0.0161608	0.830941	0.168355	0.0250938	0.450179	3.24351e-10	-0.379348	1.91817e-07	1.09961	0.883996	0.969958	0.87696	0.857714	1.25018	1.16663	1.09073	1.07704	1.13289	0.623466	0.900842	0.836679	0.840957	0.895589	1.19804	0.664625	0.327623	0.903352	1.29514	1.28555	1.1887	1.08681	1.13668	1.19303	0.831647	0.730058
ENSMUSG00000028383	Hsdl2	hydroxysteroid dehydrogenase like 2 [Source:MGI Symbol;Acc:MGI:1919729]	37126	blue	-0.0100564	0.894314	0.0284341	0.70715	-0.618788	4.37096e-20	0.172582	0.0216157	-0.323115	1.15163e-05	0.743085	2.39193e-32	-0.0731121	0.333496	0.879075	3.3527e-58	-0.886817	1.45736e-60	1.40441	0.800977	0.897019	1.45101	0.603994	0.80643	1.23636	0.943384	1.04261	1.24329	0.775586	1.06044	1.39461	0.779648	0.868128	1.5989	0.923714	1.00743	1.45697	0.696469	0.971158	1.47973	0.753006	1.08923	1.41041	0.735981	0.901075
ENSMUSG00000028394	Pole3	polymerase (DNA directed), epsilon 3 (p17 subunit) [Source:MGI Symbol;Acc:MGI:1933378]	2419	blue	-0.0456538	0.546246	-0.00720855	0.924136	-0.143545	0.0566378	0.128504	0.0882705	-0.0544474	0.471662	0.11081	0.142019	0.0608399	0.421147	0.361528	7.65396e-07	-0.274997	0.000211929	3.70666	3.83703	3.85372	4.21204	3.63219	3.72216	3.77985	4.07536	4.0808	3.70662	3.99751	3.68938	3.90428	4.02064	4.2008	3.92476	3.65267	3.46196	4.14168	3.72736	3.7442	3.6795	3.76779	3.95685	4.0118	3.86978	3.76275
ENSMUSG00000059343	Aldoart1	aldolase 1 A, retrogene 1 [Source:MGI Symbol;Acc:MGI:2447811]	2051	blue	0.0747257	0.322908	-0.122801	0.103449	-0.348963	1.93346e-06	0.144803	0.0544833	-0.108846	0.149266	0.21934	0.00335431	0.131566	0.080886	0.43905	9.77317e-10	-0.437905	1.09237e-09	2.22327	0.457575	0.338602	0.797873	0	0.352361	0.793037	0.583762	0	0.610349	0	0	0.901003	0	0	1.94739	0.453143	0.644056	0.512913	0	0	1.09061	0.581299	0.588784	1.59836	0	0.368245
ENSMUSG00000028560	Usp1	ubiquitin specific peptidase 1 [Source:MGI Symbol;Acc:MGI:2385198]	11733	blue	-0.0263403	0.727831	-0.133768	0.0758898	-0.168055	0.0253575	0.132527	0.0786746	-0.166442	0.0268185	0.50891	4.74277e-13	-0.22027	0.00321903	0.567846	1.69035e-16	-0.528855	3.83214e-14	2.32454	1.77146	2.28815	2.22631	2.20278	2.45877	2.42084	2.34985	2.34129	2.43797	2.11675	2.48411	2.28283	2.07974	2.6478	2.42001	1.91602	2.54101	2.24229	2.07922	2.37759	2.3263	1.91671	2.36195	2.45069	1.85092	2.08853
ENSMUSG00000028527	Ak4	adenylate kinase 4 [Source:MGI Symbol;Acc:MGI:87979]	47718	blue	0.0253804	0.737379	0.00413668	0.956421	-0.654239	5.38357e-23	0.251755	0.000724178	-0.306852	3.26519e-05	0.649839	1.29791e-22	0.0437504	0.563119	0.916073	2.34318e-71	-0.891686	3.87533e-62	1.44107	0.797376	0.880785	1.28004	0.529108	0.999154	1.26391	0.93439	0.690747	1.12237	0.577563	0.974724	1.40073	0.716693	0.920227	1.39579	0.76374	0.826979	1.29258	0.727023	0.661	1.3249	0.675514	0.949692	1.58729	0.427821	0.935365
ENSMUSG00000107726	Gm44037	predicted gene, 44037 [Source:MGI Symbol;Acc:MGI:5690429]	1890	blue	0.0339319	0.653889	0.0120549	0.873472	-0.354549	1.28688e-06	0.312111	2.34655e-05	0.0366568	0.628106	0.0409029	0.588819	0.193969	0.00968382	0.411846	1.23207e-08	-0.382964	1.43383e-07	0	0	0	1.13893	0.571756	0	1.13271	0.624091	0.915332	0.652132	1.02562	0.635874	0.55643	0	0.350239	1.21948	0.485895	0	0	0	0	0.494283	0	0.348748	0.52622	0.69825	0.395668
ENSMUSG00000028609	Magoh	mago homolog, exon junction complex core component [Source:MGI Symbol;Acc:MGI:1330312]	7669	blue	-0.151509	0.0441089	0.0279626	0.711789	-0.377825	2.16607e-07	0.0597746	0.42934	-0.269175	0.000291363	0.486115	6.93102e-12	0.0769744	0.308519	0.552775	1.4958e-15	-0.537888	1.16029e-14	1.88705	1.99802	1.79748	1.87438	1.71248	2.32057	2.20952	2.15965	1.51399	1.98465	1.41105	2.00109	1.96333	1.87537	2.01694	1.76604	1.70924	1.91996	1.76457	1.96227	1.98258	1.81458	1.2985	1.91191	1.71279	1.34154	1.55786
ENSMUSG00000028601	Echdc2	enoyl Coenzyme A hydratase domain containing 2 [Source:MGI Symbol;Acc:MGI:1289238]	13871	blue	0.0809079	0.284377	0.00948286	0.90031	-0.361674	7.56982e-07	0.268557	0.000301243	-0.0195781	0.795906	0.275473	0.000206419	0.0626429	0.40749	0.456403	1.71979e-10	-0.473094	2.94118e-11	0.492557	0.151046	0.392771	0.727015	0.412865	0.218624	0.814255	0.288347	0.380515	0.553077	0.358709	0.20281	0.714797	0.102699	0.247558	0.380419	0.149426	0.272634	0.589776	0.0831341	0.166597	0.586012	0.450848	0.376377	0.565386	0.117461	0.28093
ENSMUSG00000063800	Prpf38a	PRP38 pre-mRNA processing factor 38 (yeast) domain containing A [Source:MGI Symbol;Acc:MGI:1916962]	16164	blue	0.162018	0.0312016	0.0127574	0.866166	-0.360438	8.3074e-07	0.282051	0.000142743	-0.0385554	0.610401	0.219112	0.00338816	0.0984507	0.192339	0.460038	1.18012e-10	-0.456431	1.71471e-10	1.26113	0.813715	0.955932	1.11861	0.975781	0.881643	1.28751	1.0537	0.786747	0.794973	0.83775	0.955361	1.03248	1.00937	0.97368	0.910981	0.84479	1.16962	0.85804	1.01296	1.01108	1.03642	0.959334	1.08345	1.22534	1.37929	1.02368
ENSMUSG00000091985	Gm17354	predicted gene, 17354 [Source:MGI Symbol;Acc:MGI:4936988]	3598	blue	0.0418579	0.58014	0.0503166	0.505988	-0.421046	5.3619e-09	0.178455	0.0174789	-0.168658	0.0248292	0.418304	6.88844e-09	-0.0182156	0.80983	0.534052	1.93549e-14	-0.5517	1.74033e-15	0.835447	0.27829	0.680928	1.17823	0.328223	0	1.41722	0.774647	0	0.926452	0.626783	0.661654	1.16097	0.890109	0.519045	1.11316	1.30596	0.849539	0.980729	0.543353	0.958889	1.05188	0.359354	0.516954	0.760113	0.725982	0.733811
ENSMUSG00000034210	Efcab14	EF-hand calcium binding domain 14 [Source:MGI Symbol;Acc:MGI:2442397]	39583	blue	0.0448081	0.553712	0.0768172	0.309511	-0.370634	3.81302e-07	0.273555	0.00022947	-0.113083	0.133971	0.580365	2.53471e-17	-0.245783	0.000975509	0.670425	1.857e-24	-0.709617	2.06525e-28	1.57175	1.40262	1.49722	1.72073	1.43037	1.53928	1.76207	1.61094	1.32298	1.64543	1.40973	1.71704	1.55215	1.5037	1.70917	1.75206	1.56087	1.50432	1.69343	1.68891	1.75426	1.6536	1.36084	1.61494	1.66206	1.33111	1.43433
ENSMUSG00000028701	Lurap1	leucine rich adaptor protein 1 [Source:MGI Symbol;Acc:MGI:1915325]	18932	blue	0.0486253	0.520409	0.0429589	0.570209	-0.860137	4.77035e-53	0.191525	0.0106583	-0.363245	6.72224e-07	0.449743	3.38909e-10	0.375641	2.57565e-07	0.846545	8.53295e-50	-0.816194	1.49611e-43	1.1966	0.647155	0.572584	1.37862	0.662307	0.535616	1.43651	0.648319	0.734117	1.0193	0.601263	0.442983	1.24032	0.571933	0.578942	1.29808	0.879339	0.48156	1.3889	0.646144	0.70292	1.04308	0.853063	0.550002	1.21302	0.521089	0.527096
ENSMUSG00000092680	Snord55	small nucleolar RNA, C/D box 55 [Source:MGI Symbol;Acc:MGI:3819543]	78	blue	-0.0267478	0.72379	-0.0335938	0.657118	-0.376981	2.31633e-07	0.193289	0.0099466	-0.117885	0.118123	0.267475	0.000319308	0.0394838	0.601824	0.52446	6.76662e-14	-0.513577	2.67125e-13	5.93795	3.43484	0	6.2979	4.61873	4.91158	5.87775	2.91787	4.48983	3.89216	4.70593	2.94682	4.57333	5.33492	4.78825	4.48944	4.91217	4.53573	6.31437	3.52963	4.50895	5.34358	0	2.93093	6.02217	4.0076	4.58124
ENSMUSG00000006395	Hyi	hydroxypyruvate isomerase (putative) [Source:MGI Symbol;Acc:MGI:1915430]	2754	blue	-0.0514074	0.496799	-0.0302071	0.689802	-0.805049	1.52729e-41	0.063402	0.401819	-0.411119	1.3144e-08	0.270796	0.000266831	0.527379	4.64266e-14	0.692472	1.32522e-26	-0.633928	2.78051e-21	3.76969	1.55862	1.57049	3.29281	2.50401	1.9577	2.80787	1.98969	1.77912	3.0107	2.8871	1.43856	3.0189	2.34701	1.78718	2.11878	2.50385	1.03399	2.44659	2.28803	2.10036	3.14599	1.98414	1.32269	3.41496	1.99661	1.45019
ENSMUSG00000006390	Elovl1	elongation of very long chain fatty acids (FEN1/Elo2, SUR4/Elo3, yeast)-like 1 [Source:MGI Symbol;Acc:MGI:1858959]	4860	blue	0.149944	0.0463692	-0.183935	0.0142575	-0.198074	0.00822303	0.346461	2.31433e-06	0.141186	0.060868	-0.0561441	0.457941	0.133094	0.077393	0.349735	1.82846e-06	-0.304927	3.67905e-05	0.660583	0.959814	0.833055	1.26456	0.812717	0.663345	1.16149	1.03732	0.756266	1.58506	1.00509	0.621518	1.0691	0.507065	1.04862	1.24965	0.391179	0.439584	0.782981	1.33553	0.949828	0.843614	1.62949	0.968712	0.752474	0.56968	0.690259
ENSMUSG00000028645	Slc2a1	solute carrier family 2 (facilitated glucose transporter), member 1 [Source:MGI Symbol;Acc:MGI:95755]	29272	blue	-0.0358351	0.635836	-0.0466121	0.537846	-0.458624	1.36709e-10	-0.0247944	0.743228	-0.343285	2.90118e-06	0.531312	2.7785e-14	-0.00143912	0.984833	0.512513	3.04702e-13	-0.516067	1.95956e-13	1.46866	1.40464	1.27928	1.53045	0.934045	1.4047	1.47051	1.51205	1.04147	1.26434	1.0262	1.29182	1.43385	1.05923	1.13005	1.61298	1.13052	1.01801	1.43567	1.33219	1.40243	1.42682	0.928988	1.02978	1.34178	1.06023	1.11192
ENSMUSG00000028636	Ppcs	phosphopantothenoylcysteine synthetase [Source:MGI Symbol;Acc:MGI:1915237]	3890	blue	-0.0417422	0.581189	-0.0259124	0.732082	-0.228531	0.00221742	0.120624	0.10976	-0.135611	0.0719048	0.298047	5.59848e-05	-0.0257757	0.733442	0.477579	1.80011e-11	-0.420061	5.86815e-09	1.55323	1.1248	1.62859	1.55923	1.53123	1.60506	0.825908	1.75134	0.718711	1.41467	0.811398	1.45901	1.37885	0.60992	1.45181	1.19601	0.830467	1.02745	1.59735	1.1821	1.01326	0.4824	1.2067	1.44742	1.91842	1.14396	0.941021
ENSMUSG00000028657	Ppt1	palmitoyl-protein thioesterase 1 [Source:MGI Symbol;Acc:MGI:1298204]	22933	blue	-0.0800168	0.289732	-0.00438192	0.95384	-0.543857	5.16519e-15	0.104291	0.167142	-0.221376	0.00306464	0.015956	0.833051	0.475208	2.3357e-11	0.435736	1.34712e-09	-0.411985	1.21695e-08	2.48401	1.90193	2.07639	2.08287	2.13975	2.1742	2.24343	1.96324	2.3474	2.22456	2.22367	2.13024	2.25164	2.32664	2.06797	2.06192	2.15876	2.20111	2.25702	2.17505	2.16343	2.2132	2.0839	2.26564	2.3191	2.30758	2.11395
ENSMUSG00000028647	Mycbp	MYC binding protein [Source:MGI Symbol;Acc:MGI:1891750]	7437	blue	-0.0947709	0.209574	0.0279485	0.711927	-0.552061	1.65405e-15	0.227368	0.00233874	-0.181128	0.0158361	0.440454	8.52269e-10	0.0925505	0.220495	0.706923	4.05153e-28	-0.73441	2.85848e-31	1.71236	0.693843	1.11587	1.82617	1.38224	0.817991	1.38768	1.07065	0.838407	2.29905	0.94212	1.08819	1.71037	0.75536	1.45719	1.42667	1.01271	0.764129	1.46785	0.996898	1.1977	1.52065	0.969306	0.980334	1.59141	0.962917	0.783862
ENSMUSG00000050212	Eva1b	eva-1 homolog B (C. elegans) [Source:MGI Symbol;Acc:MGI:1922063]	2131	blue	-0.156392	0.0376429	0.0559626	0.459398	-0.198693	0.00802075	0.172046	0.0220326	-0.0224508	0.766765	0.225232	0.00257728	0.00481975	0.949234	0.378563	2.0424e-07	-0.355458	1.20355e-06	0	0.7811	0.818686	1.27597	0	0.847025	0.76995	1.13755	1.12347	0.591543	0.545323	0.576511	1.41663	0	0.314635	0.83639	1.2754	0	1.79302	0.471034	1.21906	0.786444	0	0.978282	1.56163	0	0
ENSMUSG00000043962	Thrap3	thyroid hormone receptor associated protein 3 [Source:MGI Symbol;Acc:MGI:2442637]	38678	blue	0.0438983	0.5618	-0.102646	0.173978	-0.237952	0.00142641	0.425415	3.58003e-09	0.106908	0.156688	0.0829402	0.272413	-0.0161123	0.83144	0.532252	2.45528e-14	-0.454792	2.02911e-10	1.77918	1.5749	1.67278	1.82602	1.45144	1.71744	1.70201	1.51831	1.69139	1.37394	1.48382	1.66231	1.77176	1.4152	1.70296	1.54896	1.61101	1.44926	1.71657	1.41103	1.5078	1.70323	1.6223	1.72757	1.86611	1.58868	1.63806
ENSMUSG00000028792	Ak2	adenylate kinase 2 [Source:MGI Symbol;Acc:MGI:87978]	19571	blue	-0.108131	0.151974	-0.0472239	0.532516	-0.564055	2.95575e-16	0.0704558	0.351403	-0.322465	1.20201e-05	0.397482	4.29955e-08	0.237271	0.0014735	0.647868	1.91611e-22	-0.61889	4.29309e-20	1.07423	0.555195	0.735811	0.826982	0.808552	0.737098	0.942194	0.792235	0.59777	1.07299	0.765728	0.667554	1.09506	0.748288	0.663365	0.988185	1.18662	0.772019	1.33411	1.00647	0.832535	0.990249	0.789107	0.731356	0.92039	0.444365	0.766286
ENSMUSG00000085085	1700086P04Rik	RIKEN cDNA 1700086P04 gene [Source:MGI Symbol;Acc:MGI:1914599]	7896	blue	-0.0968664	0.199628	0.0846484	0.262626	-0.402863	2.71072e-08	0.227033	0.0023748	-0.0943878	0.21143	0.19378	0.00975632	0.149815	0.04656	0.5077	5.49643e-13	-0.530912	2.92846e-14	0.308349	0.255676	0.0958735	0	0.158866	0.193734	0	0.0905499	0	0.184969	0	0	0.420023	0	0	0	0.132055	0.101762	0.735844	0	0	0	0	0	0.507334	0	0
ENSMUSG00000028793	Rnf19b	ring finger protein 19B [Source:MGI Symbol;Acc:MGI:1922484]	27615	blue	0.00779772	0.917956	-0.0702204	0.353019	-0.915317	4.96503e-71	0.15106	0.0447476	-0.427648	2.90575e-09	0.352061	1.54418e-06	0.527332	4.6712e-14	0.87612	2.42406e-57	-0.80702	6.88826e-42	2.5704	1.54236	1.47917	2.19938	1.70637	1.32189	2.38337	1.33271	1.67039	2.44862	1.6447	1.37414	2.54387	1.67199	1.23512	2.82629	1.58532	1.33655	2.71824	1.80849	1.40033	2.5729	1.77918	1.45446	2.88487	1.79544	1.26531
ENSMUSG00000001334	Fndc5	fibronectin type III domain containing 5 [Source:MGI Symbol;Acc:MGI:1917614]	7594	blue	0.0445896	0.555649	-0.0322935	0.669595	-0.663228	8.51705e-24	0.338043	4.19048e-06	-0.208508	0.00535209	0.569597	1.30253e-16	0.054937	0.46768	0.926646	2.86462e-76	-0.903481	2.73901e-66	3.99909	2.33117	3.15872	4.23666	2.38856	3.21625	4.20278	3.0368	2.70326	4.0322	2.65189	3.08963	3.90095	2.44553	3.11423	4.37364	3.01368	2.69405	4.27304	2.79889	3.24737	4.25567	2.36581	2.87369	4.27825	2.28494	3.10733
ENSMUSG00000057236	Rbbp4	retinoblastoma binding protein 4, chromatin remodeling factor [Source:MGI Symbol;Acc:MGI:1194912]	28270	blue	-0.0745551	0.324017	-0.0320866	0.671589	-0.757817	2.79383e-34	0.103887	0.168804	-0.425539	3.53899e-09	0.584212	1.39189e-17	0.26906	0.000293174	0.863354	7.21818e-54	-0.831452	1.55535e-46	2.77054	1.94231	2.08523	2.71054	2.10983	2.3992	2.71262	2.27369	2.2242	2.94943	2.29652	2.10908	2.77658	1.9886	2.14301	2.80952	2.29537	2.26206	2.78346	2.16753	2.10546	2.85372	2.00861	2.21921	3.0112	2.08622	2.05812
ENSMUSG00000028795	Ccdc28b	coiled coil domain containing 28B [Source:MGI Symbol;Acc:MGI:1913514]	4673	blue	0.0503319	0.505859	-0.0855604	0.2575	-0.697071	4.46734e-27	0.332218	6.25642e-06	-0.116406	0.12284	0.0325158	0.667456	0.578881	3.18768e-17	0.656565	3.36117e-23	-0.584157	1.40378e-17	2.14484	1.20821	2.00673	2.33681	1.6616	1.6155	2.01975	1.57053	1.5709	1.62305	1.89652	1.1584	2.20682	2.09932	1.68824	2.25143	1.63484	1.68832	2.18911	1.79286	1.49402	2.26338	1.85335	1.34959	2.29761	2.17792	1.26536
ENSMUSG00000028911	Srsf4	serine and arginine-rich splicing factor 4 [Source:MGI Symbol;Acc:MGI:1890577]	28089	blue	-0.0326478	0.666186	0.0491961	0.515519	-0.614329	9.56675e-20	0.193615	0.00981985	-0.26304	0.000404368	0.720097	1.3937e-29	-0.0514245	0.496656	0.80249	4.23612e-41	-0.845439	1.51948e-49	1.94368	1.08226	1.12317	1.54319	0.726367	1.18435	1.71097	1.1267	0.944141	2.08068	1.15037	1.01784	2.20476	0.849247	1.36261	1.90363	0.917764	1.26123	2.11622	0.81688	0.961265	1.80818	1.06139	1.11049	1.7008	0.877948	0.935827
ENSMUSG00000085241	Snhg3	small nucleolar RNA host gene 3 [Source:MGI Symbol;Acc:MGI:2684817]	5672	blue	0.00501389	0.947192	0.100996	0.181038	-0.492642	3.28155e-12	0.233297	0.0017777	-0.197884	0.00828622	0.770938	4.02513e-36	-0.225836	0.00250775	0.786667	1.69386e-38	-0.82617	1.80837e-45	3.02362	1.88722	1.87905	2.96531	1.29777	2.20204	2.93051	2.05524	1.54547	3.22942	1.25134	2.25807	3.01022	1.39171	2.43157	2.90558	1.64847	2.08938	3.09837	1.52897	1.80512	3.08555	1.28416	2.09771	2.47161	0.698055	1.72824
ENSMUSG00000066042	Med18	mediator complex subunit 18 [Source:MGI Symbol;Acc:MGI:1914469]	5190	blue	0.0708517	0.348697	-0.0478693	0.526923	-0.274522	0.000217562	0.363222	6.73438e-07	0.0987973	0.190771	-0.131584	0.0808449	0.274672	0.000215773	0.403787	2.50219e-08	-0.3075	3.13593e-05	1.58204	0.914541	0.702416	1.01543	0.91496	0.906593	1.00967	0.838665	0.853294	0.87378	0.958311	0.381341	1.61193	1.47233	0.48568	0.569329	1.11546	0.289688	1.12499	0.964358	0.627844	1.02972	1.24648	0.923139	0.972117	1.23892	0.756572
ENSMUSG00000028882	Ppp1r8	protein phosphatase 1, regulatory subunit 8 [Source:MGI Symbol;Acc:MGI:2140494]	16240	blue	-0.0298014	0.693758	-0.0819372	0.278274	-0.529341	3.59668e-14	0.20213	0.00697548	-0.234646	0.00166851	0.251745	0.000724522	0.219945	0.00326574	0.699781	2.33098e-27	-0.628224	7.99085e-21	2.00443	1.6637	1.78191	1.9603	1.70662	1.88373	2.03562	1.98568	1.75343	1.73458	1.91558	1.71735	1.83764	1.78981	1.72351	1.97741	1.54141	1.78736	2.00698	1.59768	1.45551	2.11398	1.83565	1.71869	2.33535	2.0662	1.93649
ENSMUSG00000046671	Mtfr1l	mitochondrial fission regulator 1-like [Source:MGI Symbol;Acc:MGI:1924074]	9837	blue	0.13286	0.0779197	-0.150156	0.0460571	-0.438118	1.07005e-09	0.324917	1.02218e-05	-0.0463703	0.539959	0.285473	0.000117388	0.0979732	0.194515	0.630531	5.22781e-21	-0.586209	1.0164e-17	2.60139	2.21954	2.12579	2.76009	1.89132	2.48915	2.39988	2.32296	1.89672	2.45992	2.69443	2.08602	2.66332	2.11409	2.41386	2.63006	2.05469	2.1383	2.53773	1.7407	1.95485	2.55276	2.17553	2.22582	2.38636	1.54287	1.75038
ENSMUSG00000028821	Syf2	SYF2 homolog, RNA splicing factor (S. cerevisiae) [Source:MGI Symbol;Acc:MGI:1915842]	6650	blue	-0.0369789	0.625087	0.0040724	0.957098	-0.731464	6.49166e-31	0.198342	0.00813501	-0.320977	1.32534e-05	0.55449	1.17354e-15	0.196992	0.00858775	0.837559	8.17758e-48	-0.812604	6.86679e-43	3.3297	2.48659	2.81505	3.65727	2.47542	2.95245	3.51037	2.70879	2.56324	3.42565	2.51358	2.92819	3.29689	2.52877	2.81007	3.46853	2.98961	2.57199	3.06587	2.71539	2.76286	3.5321	2.5221	2.75514	3.47674	2.61612	2.75269
ENSMUSG00000037242	Clic4	chloride intracellular channel 4 (mitochondrial) [Source:MGI Symbol;Acc:MGI:1352754]	58845	blue	-0.0334542	0.658453	0.0329531	0.663254	-0.559989	5.34082e-16	0.321734	1.26119e-05	-0.178391	0.0175199	0.661758	1.15648e-23	-0.108882	0.149131	0.900248	4.23026e-65	-0.91115	2.75705e-69	2.10747	1.266	1.436	2.14101	1.07658	1.51164	1.98174	1.49395	1.21614	2.06193	1.12503	1.34919	2.09254	1.00627	1.49918	2.13738	1.13498	1.00019	2.28799	1.00484	1.82341	2.08016	1.0632	1.59458	2.20317	1.05639	1.41807
ENSMUSG00000059713	Rcan3	regulator of calcineurin 3 [Source:MGI Symbol;Acc:MGI:1858220]	21545	blue	0.082263	0.276361	0.0260694	0.730522	-0.753221	1.15797e-33	0.316	1.8305e-05	-0.252618	0.000693242	0.506555	6.31524e-13	0.194726	0.0093983	0.900749	2.7853e-65	-0.880908	9.57019e-59	1.2614	0.438614	0.811856	1.48171	0.512608	0.533772	1.4744	0.775843	0.765117	0.586241	0.669605	0.547536	1.36111	0.606453	0.590896	1.14036	0.610641	0.593497	1.43667	0.426213	1.03617	1.24009	0.732315	0.741295	1.3253	0.773947	0.686153
ENSMUSG00000028676	Srsf10	serine and arginine-rich splicing factor 10 [Source:MGI Symbol;Acc:MGI:1333805]	14161	blue	0.0476761	0.528594	0.0452259	0.550017	-0.0396921	0.599907	0.510815	3.75617e-13	0.250965	0.00075359	0.409603	1.5035e-08	-0.404676	2.3163e-08	0.549787	2.27519e-15	-0.557852	7.26425e-16	2.27892	1.88863	2.10263	1.95905	1.82025	1.75019	2.30058	2.33492	1.77574	2.09754	1.77372	2.38229	2.11405	1.37291	2.36289	2.34439	1.64978	2.33179	2.25455	1.85383	1.96997	2.3322	1.84285	1.916	2.15897	1.54151	2.05611
ENSMUSG00000028675	Pnrc2	proline-rich nuclear receptor coactivator 2 [Source:MGI Symbol;Acc:MGI:106512]	2932	blue	-0.0767277	0.310077	-0.0454358	0.548166	-0.147362	0.0503087	0.123667	0.101021	-0.0662473	0.380986	0.342776	3.00757e-06	-0.0984744	0.192232	0.334873	5.21705e-06	-0.34981	1.81859e-06	3.06692	2.6373	2.6279	3.04137	2.58878	2.63809	2.73077	2.75631	2.61827	2.62233	2.0017	3.02516	2.39154	2.86451	2.98326	2.23611	2.0348	2.70285	2.45409	2.3811	2.58949	2.87217	2.71229	2.61162	2.22911	3.03971	2.78635
ENSMUSG00000028672	Hmgcl	3-hydroxy-3-methylglutaryl-Coenzyme A lyase [Source:MGI Symbol;Acc:MGI:96158]	16169	blue	-0.0462067	0.541391	0.0851245	0.259941	-0.696554	5.0532e-27	0.188326	0.0120642	-0.328239	8.18827e-06	0.730068	9.54223e-31	0.0217841	0.7735	0.867927	4.52554e-55	-0.900705	2.88945e-65	1.48733	0.412949	0.555591	1.05474	0.227177	0.70634	1.08088	0.814909	0.271581	1.61864	0.31285	0.906145	1.37592	0.591063	0.743715	1.40956	0.408891	0.777192	1.66275	0.776029	0.765596	1.28269	0.323964	0.595912	1.45905	0.661884	0.766225
ENSMUSG00000028670	Lypla2	lysophospholipase 2 [Source:MGI Symbol;Acc:MGI:1347000]	4402	blue	0.0633116	0.402492	-0.232605	0.00183611	-0.113404	0.132863	0.0740265	0.327469	-0.0444453	0.556931	-0.0461374	0.541999	0.146263	0.052068	0.270151	0.000276352	-0.159388	0.0340848	3.89641	3.86434	3.77556	3.9336	3.75792	3.87412	3.71363	3.80873	3.80052	3.80782	3.72577	3.57763	4.01388	3.902	3.26485	4.2671	4.10114	3.45457	3.88022	3.51942	3.26518	3.91028	3.87186	3.78633	4.25867	3.37226	3.75107
ENSMUSG00000001089	Luzp1	leucine zipper protein 1 [Source:MGI Symbol;Acc:MGI:107629]	85019	blue	0.0925977	0.220259	-0.0823114	0.276078	-0.0991649	0.189117	0.464788	7.16739e-11	0.223985	0.00272664	0.00811804	0.914599	-0.0606581	0.422539	0.434105	1.57553e-09	-0.366387	5.29128e-07	1.16306	1.11203	1.42134	1.25682	1.08704	1.37205	1.33351	1.35848	1.2016	0.898323	1.45946	1.33379	1.22599	1.31069	1.3548	1.43468	1.21812	1.41302	1.33587	1.26499	1.33216	1.36261	1.12767	1.31224	1.38652	1.01728	1.44288
ENSMUSG00000101493	2810405F17Rik	RIKEN cDNA 2810405F17 gene [Source:MGI Symbol;Acc:MGI:1917225]	1179	blue	0.168157	0.0252679	-0.0113968	0.880326	-0.290546	8.74382e-05	0.322392	1.20781e-05	0.0539482	0.475742	0.10271	0.173707	0.0847769	0.261899	0.397443	4.31383e-08	-0.394136	5.70447e-08	2.06755	1.20073	0.941377	0.71579	0	0.566825	0	0	0	1.90627	0.872043	0	1.32704	1.4521	0.526544	1.27495	0	0	0	1.26047	0.565641	0.726867	0.897773	0.524428	0.770267	0	0
ENSMUSG00000041120	Nbl1	NBL1, DAN family BMP antagonist [Source:MGI Symbol;Acc:MGI:104591]	10709	blue	-0.0778201	0.303218	-0.0709883	0.347766	-0.246761	0.00092952	0.042138	0.577606	-0.234237	0.00170093	0.47553	2.25474e-11	-0.183666	0.0144029	0.540088	8.62609e-15	-0.515763	2.03543e-13	2.49977	2.23789	2.2781	2.50276	1.61351	2.21906	2.23841	2.33904	1.80813	2.14706	1.71596	1.82439	2.51964	1.4437	2.16721	2.56662	1.90932	1.84259	2.43705	2.0796	2.02337	2.18069	1.8722	2.39149	2.35532	1.94733	2.24223
ENSMUSG00000050608	Micos10	mitochondrial contact site and cristae organizing system subunit 10 [Source:MGI Symbol;Acc:MGI:1913628]	29299	blue	-0.13732	0.0683597	-0.0360223	0.634071	-0.442732	6.81524e-10	-0.186612	0.0128821	-0.414395	9.8087e-09	0.256193	0.000577645	0.395669	5.01362e-08	0.320072	1.40607e-05	-0.271465	0.000257287	1.72764	1.91436	1.71268	1.75624	1.28872	1.5446	1.6573	1.50232	1.54332	1.14832	1.6345	1.60244	1.41669	1.59738	1.58636	1.66504	1.61663	1.68958	2.03849	1.582	1.56122	1.61165	1.59198	1.6482	1.40424	1.35961	1.43821
ENSMUSG00000028923	Necap2	NECAP endocytosis associated 2 [Source:MGI Symbol;Acc:MGI:1913397]	11845	blue	0.0260402	0.730812	-0.0937691	0.214452	-0.476098	2.11864e-11	0.275985	0.000200644	-0.140888	0.0614203	0.48881	5.10002e-12	0.0157685	0.834985	0.71247	1.00336e-28	-0.696807	4.75744e-27	1.18318	1.23704	0.938162	1.34173	0.625922	0.933684	1.77002	1.02597	0.436619	1.45025	0.498965	1.01174	1.48658	1.02631	1.03719	1.67384	0.872363	0.94534	1.30946	1.02994	1.16499	1.43039	0.679357	0.800543	0.935838	0.761563	0.435573
ENSMUSG00000048406	B330016D10Rik	RIKEN cDNA B330016D10 gene [Source:MGI Symbol;Acc:MGI:2444063]	1703	blue	0.0700358	0.354289	0.0441756	0.559329	-0.618231	4.82399e-20	0.282807	0.000136737	-0.215573	0.00395595	0.5552	1.06108e-15	0.0529972	0.483566	0.845884	1.20553e-49	-0.825441	2.52158e-45	2.1092	2.335	1.18545	2.76159	0.622681	0.414872	3.1606	1.3229	0.576905	2.74592	1.10406	1.15665	2.75389	0.678924	1.15041	2.43924	0	1.23598	3.35826	0.975465	1.87134	2.58217	0.675898	1.64357	2.557	1.9121	1.45996
ENSMUSG00000028917	Plekhm2	pleckstrin homology domain containing, family M (with RUN domain) member 2 [Source:MGI Symbol;Acc:MGI:1916832]	39165	blue	-0.0158794	0.833841	-0.018499	0.806929	-0.609151	2.33889e-19	0.0252011	0.739167	-0.400795	3.23962e-08	0.583401	1.58032e-17	0.0880734	0.243734	0.707921	3.15952e-28	-0.688352	3.4509e-26	1.57031	1.40153	1.203	1.46454	1.08849	1.11037	1.61016	1.30021	1.2175	1.39349	1.27776	1.15673	1.42257	1.20573	1.2423	1.50487	1.29241	1.29789	1.53624	1.14957	1.48126	1.52271	1.32603	1.26231	1.47727	0.880626	1.28179
ENSMUSG00000046862	Pramel12	PRAME like 12 [Source:MGI Symbol;Acc:MGI:2140473]	8665	blue	-0.0070819	0.925465	-0.0832815	0.270439	-0.644378	3.79247e-22	0.12332	0.101988	-0.288757	9.70708e-05	0.283543	0.000131115	0.338622	4.02516e-06	0.661607	1.19326e-23	-0.614277	9.65291e-20	1.66513	0.694573	0.90812	1.41181	1.18456	1.12346	1.53991	1.20075	1.29243	1.69766	1.48928	1.01927	1.74889	1.47073	1.05575	1.68786	0.90571	1.17973	1.2102	1.1599	0.985324	1.33066	1.12068	1.28184	1.68173	1.15191	1.36907
ENSMUSG00000059423	Zfp933	zinc finger protein 933 [Source:MGI Symbol;Acc:MGI:1922865]	25380	blue	-0.0364118	0.630407	-0.203902	0.00648519	-0.23067	0.00200909	0.332593	6.09858e-06	0.0493115	0.514533	0.189349	0.0115977	0.0207948	0.783526	0.531083	2.86335e-14	-0.467255	5.51492e-11	1.1284	0.996626	0.857847	0.804078	0.659431	0.778549	0.823552	0.88472	1.01626	0.749254	0.693405	0.748945	0.960702	0.488756	0.796284	1.08496	0.778802	0.983817	1.0493	0.803746	0.814098	0.739366	0.783894	0.776297	1.22889	0.503075	0.789483
ENSMUSG00000029007	Agtrap	angiotensin II, type I receptor-associated protein [Source:MGI Symbol;Acc:MGI:1339977]	10970	blue	0.0289079	0.702499	-0.00673482	0.929108	-0.114715	0.12841	0.312747	2.2537e-05	0.0951457	0.20777	0.157929	0.0357798	-0.063627	0.400147	0.434734	1.48333e-09	-0.367583	4.82711e-07	1.13791	0.431789	0.91857	1.16525	0.665869	1.13069	1.51066	1.08338	0.68759	1.18903	0.440342	0.930967	0.980389	0.641315	1.09502	1.04839	0.568474	0.506735	0.969266	0.60883	0.444826	0.98958	0.638422	1.24262	1.04381	0.7168	0.860356
ENSMUSG00000041459	Tardbp	TAR DNA binding protein [Source:MGI Symbol;Acc:MGI:2387629]	14637	blue	0.0620961	0.411604	0.122518	0.104253	-0.401593	3.02485e-08	0.343723	2.8126e-06	-0.0767243	0.310098	0.636596	1.6841e-21	-0.272314	0.000245626	0.710044	1.85514e-28	-0.739775	6.23551e-32	2.94194	2.37404	2.5407	2.99736	2.25334	2.63999	2.94953	2.80227	2.22063	2.86244	2.26662	2.89467	2.85982	2.4892	2.7544	2.8432	2.30154	2.85383	2.84032	2.53059	2.84534	3.02202	2.35112	2.77107	3.13526	2.18172	2.82193
ENSMUSG00000044700	Tmem201	transmembrane protein 201 [Source:MGI Symbol;Acc:MGI:1196277]	22669	blue	0.0854439	0.258151	0.0066645	0.929846	-0.648793	1.59646e-22	0.329897	7.323e-06	-0.100207	0.184487	0.0994107	0.188018	0.439061	9.76351e-10	0.631366	4.4798e-21	-0.559212	5.97409e-16	1.11237	0.773269	0.986433	1.22428	0.721379	1.00087	1.21777	0.875635	1.0504	1.03438	0.829652	0.636123	1.44703	1.23534	0.754685	1.02423	0.875532	0.732799	1.20996	0.985486	0.677354	1.50573	0.663226	0.771267	1.12055	1.06348	0.9807
ENSMUSG00000063524	Eno1	enolase 1, alpha non-neuron [Source:MGI Symbol;Acc:MGI:95393]	12158	blue	-0.0917616	0.224472	0.0589437	0.435793	-0.559105	6.06751e-16	0.382986	1.43121e-07	-0.0217954	0.773386	0.209751	0.0050784	0.257156	0.000549689	0.62332	1.9467e-20	-0.641111	7.12795e-22	0.888433	0.647694	0.57616	0.855846	0.462585	0.505915	0.638053	0.463223	0.633131	1.16592	0.644859	0.51653	1.01738	0.742788	0.329164	1.07145	0.390953	0.464366	1.1059	0.559462	0.406929	1.05649	0.810118	0.226555	0.918002	0.56937	0.57583
ENSMUSG00000028964	Park7	Parkinson disease (autosomal recessive, early onset) 7 [Source:MGI Symbol;Acc:MGI:2135637]	17304	blue	0.0393363	0.603183	-0.160275	0.0330887	-0.274043	0.000223384	0.25035	0.000777243	0.0333382	0.659563	0.00731795	0.922988	0.266614	0.000334391	0.389802	8.18982e-08	-0.316147	1.81323e-05	2.24833	2.22397	2.17366	2.57188	1.89105	2.43133	2.42916	2.16602	2.06815	2.22736	2.34283	2.10335	2.32465	2.16653	2.15423	2.569	2.06796	2.35103	2.37852	2.11384	1.99146	2.38955	2.33859	2.3482	2.21837	2.15955	2.08398
ENSMUSG00000028955	Vamp3	vesicle-associated membrane protein 3 [Source:MGI Symbol;Acc:MGI:1321389]	10663	blue	0.049777	0.510566	0.0404031	0.593384	-0.20107	0.00728411	0.0481159	0.524794	-0.141729	0.0598729	0.24406	0.00106169	-0.00671539	0.929312	0.321247	1.30209e-05	-0.295367	6.57478e-05	0.770465	1.36703	1.42175	1.61344	1.44574	1.46258	1.63879	1.34195	1.71243	1.21216	1.35649	1.27711	1.46036	1.1055	1.53576	1.36175	1.39645	1.73426	1.48883	1.34667	1.4035	1.93533	1.49231	1.53122	1.16881	1.21669	1.45094
ENSMUSG00000039759	Thap3	THAP domain containing, apoptosis associated protein 3 [Source:MGI Symbol;Acc:MGI:1917126]	6358	blue	0.0690543	0.36109	0.0529223	0.484185	-0.292119	7.97136e-05	0.321274	1.2998e-05	-0.00174375	0.981623	0.340742	3.47057e-06	-0.0744314	0.324822	0.554447	1.18071e-15	-0.550082	2.18329e-15	1.61896	1.28971	1.72422	1.65268	0.658348	1.22567	1.69842	1.8048	1.36751	1.95903	0.547821	1.72468	1.63157	1.38385	1.68048	1.36726	1.47799	1.49326	1.61627	1.42348	1.56481	1.92363	1.18937	1.15012	1.2069	1.41441	1.65876
ENSMUSG00000073700	Klhl21	kelch-like 21 [Source:MGI Symbol;Acc:MGI:1919288]	8877	blue	-0.00750201	0.921057	0.119341	0.113617	-0.197322	0.00847511	0.316348	1.78989e-05	0.0202062	0.789509	0.496551	2.08089e-12	-0.320235	1.39119e-05	0.578836	3.20981e-17	-0.606633	3.59183e-19	1.43063	1.02489	1.33798	1.13386	1.6665	1.44668	1.8235	1.62023	1.38041	1.61753	0.99453	1.64278	1.68006	1.3212	1.55117	1.78726	1.29245	1.39241	1.57182	1.01404	1.51044	1.9527	1.66823	1.42676	1.26645	1.5138	1.26955
ENSMUSG00000039662	Icmt	isoprenylcysteine carboxyl methyltransferase [Source:MGI Symbol;Acc:MGI:1888594]	9894	blue	-0.000488852	0.994848	-0.00390446	0.958865	-0.818576	5.34331e-44	0.19942	0.00778853	-0.373837	2.96912e-07	0.641635	6.44581e-22	0.195272	0.00919702	0.934135	3.22983e-80	-0.922431	3.15733e-74	3.46975	1.1114	1.27843	3.04825	0.947864	1.28316	3.43255	1.43613	1.12746	3.392	1.06232	1.1136	3.51457	1.02459	0.920141	3.69249	1.24911	1.29755	3.87077	0.806067	1.28101	3.64089	0.782426	1.10381	2.98086	0.673193	0.834806
ENSMUSG00000086272	BC039966	cDNA sequence BC039966 [Source:MGI Symbol;Acc:MGI:3039570]	2910	blue	-0.0849984	0.260651	-0.0801328	0.289031	-0.651484	9.35591e-23	0.0883762	0.24211	-0.333673	5.66467e-06	0.373406	3.07127e-07	0.300766	4.74859e-05	0.672049	1.30927e-24	-0.644635	3.60746e-22	0.71947	0	0.246644	0.333726	0.961694	0.256992	1.19602	0	0	0.455411	0.742232	0	0.938844	0	0	0.364729	0	0.260994	0.928056	0	1.23967	1.21845	0.432665	0.235856	0.652365	0.489879	0
ENSMUSG00000047613	A430005L14Rik	RIKEN cDNA A430005L14 gene [Source:MGI Symbol;Acc:MGI:2140680]	4688	blue	-0.0794044	0.293451	0.0542921	0.472929	-0.605842	4.10631e-19	0.0620311	0.412095	-0.372267	3.35762e-07	0.713078	8.59261e-29	0.00697353	0.926602	0.71477	5.57136e-29	-0.754019	9.06676e-34	1.48856	1.20559	0.9455	1.96643	1.24639	1.06302	2.01627	0.818618	1.17005	2.15575	0.875947	1.29364	1.43703	0.726755	0.91549	1.73167	0.718775	1.37864	1.99584	0.908845	1.06112	2.35571	0.520218	0.732462	1.72546	0.586845	1.10095
ENSMUSG00000029030	Tprgl	transformation related protein 63 regulated like [Source:MGI Symbol;Acc:MGI:1915058]	3181	blue	-0.0824841	0.275068	-0.0208252	0.783218	-0.598471	1.40552e-18	-0.260812	0.0004546	-0.641614	6.47183e-22	0.760981	1.0304e-34	0.0435227	0.565154	0.658534	2.24811e-23	-0.654804	4.80343e-23	5.70499	5.16566	5.33626	5.53099	4.98319	5.47648	5.80834	5.39236	5.42124	5.78106	5.17315	5.25501	5.60098	5.10683	5.24397	5.70905	5.13028	5.32857	5.89134	5.0476	5.43188	5.45853	5.17761	5.11404	5.57929	5.11517	5.03056
ENSMUSG00000029048	Rer1	retention in endoplasmic reticulum sorting receptor 1 [Source:MGI Symbol;Acc:MGI:1915080]	12272	blue	-0.0450488	0.551582	0.0469484	0.534912	-0.46474	7.20362e-11	0.0554526	0.463506	-0.317356	1.67728e-05	0.698575	3.11668e-27	-0.0510281	0.499984	0.658512	2.25866e-23	-0.673624	9.30815e-25	1.99629	1.45763	1.60107	2.19518	1.36339	1.82496	1.95522	1.75516	1.28259	2.08968	1.08182	1.7051	2.0914	0.663351	1.90713	2.26891	1.11889	1.40371	2.58367	1.34599	1.72507	2.13694	1.49796	1.80106	2.11156	1.54474	1.62747
ENSMUSG00000073684	Faap20	Fanconi anemia core complex associated protein 20 [Source:MGI Symbol;Acc:MGI:1914763]	6885	blue	0.0774155	0.305747	-0.0306976	0.685031	-0.734631	2.68621e-31	0.0847253	0.262191	-0.388802	8.89587e-08	0.386652	1.0617e-07	0.352748	1.46863e-06	0.733096	4.12629e-31	-0.68295	1.18197e-25	1.60862	1.78494	1.7502	2.24492	1.8758	1.21325	2.33286	1.5146	1.61699	1.87458	1.43621	1.33368	2.08058	1.87797	1.52892	2.13883	1.52044	1.11996	1.97274	1.28336	1.86018	2.12602	1.98414	1.40678	2.20938	1.43772	1.40371
ENSMUSG00000029054	Gabrd	gamma-aminobutyric acid (GABA) A receptor, subunit delta [Source:MGI Symbol;Acc:MGI:95622]	13132	blue	0.0232251	0.758964	-0.0111469	0.882932	-0.937288	5.07046e-82	0.0210014	0.781429	-0.470015	4.1034e-11	0.270802	0.00026675	0.655264	4.37707e-23	0.685404	6.77827e-26	-0.634154	2.66529e-21	2.34581	1.22696	0.802131	2.41292	1.6644	0.560995	2.1851	0.514433	1.63414	2.33064	1.27278	0.639706	2.34029	1.77227	0.635657	2.27035	2.07982	0.875721	2.07059	1.61712	1.3018	2.21606	1.16347	0.869072	2.31931	1.28307	0.627591
ENSMUSG00000029061	Mmp23	matrix metallopeptidase 23 [Source:MGI Symbol;Acc:MGI:1347361]	2729	blue	0.053928	0.475907	-0.0239985	0.751196	-0.691765	1.56368e-26	0.291018	8.50486e-05	-0.209347	0.00516592	0.418626	6.68959e-09	0.261063	0.000448655	0.809589	2.40752e-42	-0.78574	2.36826e-38	1.25031	0	0	0.873875	0	0	1.07132	0.247831	0	1.36914	0.442218	0	1.39489	0	0.251321	1.15502	0	0	1.3809	0	0.271894	0.647075	0.457247	0.250215	1.15012	0	0
ENSMUSG00000074738	Fndc10	fibronectin type III domain containing 10 [Source:MGI Symbol;Acc:MGI:2444790]	2139	blue	0.10912	0.148237	-0.121889	0.106058	-0.629463	6.3658e-21	0.216502	0.00379917	-0.252906	0.000683188	0.37995	1.82794e-07	0.176522	0.0187573	0.758948	1.95956e-34	-0.703442	9.56829e-28	3.914	3.36524	3.34075	4.16958	2.81066	3.16318	3.84287	3.15232	2.696	4.18338	2.88885	3.46372	4.20674	3.26486	3.24755	4.27739	3.70382	2.54994	3.85888	3.24222	3.35908	4.38252	2.93752	3.47873	4.38091	3.02695	3.42742
ENSMUSG00000084845	Tmem240	transmembrane protein 240 [Source:MGI Symbol;Acc:MGI:3648074]	5764	blue	0.0147543	0.845461	-0.037427	0.620897	-0.788661	8.19177e-39	-0.00268004	0.971758	-0.402413	2.81832e-08	0.116173	0.123598	0.676984	4.46448e-25	0.533878	1.98076e-14	-0.464629	7.28878e-11	2.24912	1.51566	1.37861	2.55131	2.01073	1.74956	2.50919	1.47234	1.9107	1.93011	2.34363	1.53951	2.3692	2.06899	1.11853	2.34087	1.50503	1.88874	2.58812	1.9467	1.56746	2.24841	2.12256	1.52756	2.29183	2.02216	1.56847
ENSMUSG00000073680	Tmem88b	transmembrane protein 88B [Source:MGI Symbol;Acc:MGI:2444329]	4283	blue	-0.0592289	0.433572	-0.0146664	0.84637	-0.1748	0.0199636	0.270078	0.000277458	-0.0538461	0.476578	0.648757	1.6079e-22	-0.411221	1.30254e-08	0.670624	1.77938e-24	-0.690351	2.17329e-26	3.93332	2.85908	3.64703	3.98676	2.85273	3.39759	4.02353	3.6806	3.37621	4.01178	3.20597	3.82766	3.72824	2.03784	3.79209	3.85646	3.10411	3.18333	3.79493	3.01932	4.0753	4.15132	2.79501	3.69447	4.16172	2.57163	3.65047
ENSMUSG00000029068	Ccnl2	cyclin L2 [Source:MGI Symbol;Acc:MGI:1927119]	12054	blue	0.125673	0.0955667	0.0266887	0.724376	-0.451644	2.7966e-10	0.59355	3.141e-18	0.121498	0.107191	0.416108	8.40648e-09	-0.0839273	0.266728	0.81317	5.41194e-43	-0.809618	2.37894e-42	3.29561	1.71642	2.06892	2.6211	1.64852	2.25271	2.93922	1.97372	1.71905	2.75164	1.87964	1.98285	2.9614	2.05011	2.23423	3.12232	1.6192	2.15279	2.7984	2.18568	2.08398	3.05379	1.78594	1.81954	2.93079	1.51328	2.15813
ENSMUSG00000029070	Mxra8	matrix-remodelling associated 8 [Source:MGI Symbol;Acc:MGI:1922011]	4408	blue	0.0164158	0.828313	0.0560463	0.458725	-0.443711	6.18765e-10	0.34149	3.29293e-06	-0.0804449	0.287151	0.524989	6.32172e-14	-0.114371	0.12957	0.781284	1.15931e-37	-0.782994	6.32941e-38	2.07085	0.231016	1.44529	1.69315	0.700943	1.61332	1.52361	1.5717	0.250893	2.06538	0.917062	1.12923	2.27321	0.947617	1.58632	1.87123	0.599416	0.335513	2.3706	1.20577	0.71544	1.6334	0.759263	1.0393	2.25533	1.04802	0.183071
ENSMUSG00000029071	Dvl1	dishevelled segment polarity protein 1 [Source:MGI Symbol;Acc:MGI:94941]	11901	blue	-0.0375776	0.619491	-0.0739849	0.327741	-0.516243	1.91687e-13	-0.0761572	0.313699	-0.393793	5.87133e-08	0.556021	9.44017e-16	0.0775945	0.304627	0.525428	5.97413e-14	-0.536253	1.44417e-14	2.05727	2.11927	1.71345	2.16997	1.55132	1.69636	2.20127	1.85663	1.53582	2.15342	1.72379	1.88081	2.49413	2.00352	1.60924	2.32452	1.85098	2.15144	1.97931	1.58733	1.92822	2.27163	1.56891	1.68473	2.25539	1.71101	1.63447
ENSMUSG00000035692	Isg15	ISG15 ubiquitin-like modifier [Source:MGI Symbol;Acc:MGI:1855694]	1341	blue	-0.104981	0.164337	-0.0797606	0.291284	-0.360274	8.41062e-07	-0.0286803	0.704732	-0.218783	0.00343763	0.166759	0.0265257	0.274246	0.0002209	0.320576	1.36058e-05	-0.298368	5.49129e-05	1.63442	1.09874	1.1465	0.645959	2.14638	0	1.08451	1.33665	0	0.852362	1.67349	0.475414	0.734046	0.818171	1.34996	2.04297	1.70381	0.516343	2.47788	1.50624	1.18025	0.656184	1.33217	0.824412	1.16395	0	0
ENSMUSG00000104891	2510017J16Rik	RIKEN cDNA 2510017J16 gene [Source:MGI Symbol;Acc:MGI:1913824]	1262	blue	0.00451872	0.952401	0.0151869	0.840989	-0.25326	0.000671005	0.560465	4.98574e-16	0.265882	0.000347742	0.0985546	0.191868	0.0207478	0.784004	0.495764	2.28191e-12	-0.50142	1.17032e-12	0.803606	0	0	1.13768	0	0	1.47831	0.490864	0.734178	1.43922	0	0.500548	0.769618	0	0	0.734012	0	0.543261	1.91662	0	0.534533	0	0	0	0	0.950337	1.27365
ENSMUSG00000104950	4833413G10Rik	RIKEN cDNA 4833413G10 gene [Source:MGI Symbol;Acc:MGI:1921834]	1945	blue	-0.0981174	0.193856	0.0337784	0.655354	-0.125503	0.0960195	0.109009	0.148655	-0.0396359	0.600423	0.310898	2.5337e-05	-0.200516	0.0074501	0.321837	1.25267e-05	-0.339842	3.69661e-06	1.2934	0.478788	1.0812	1.55923	0.558345	1.29785	1.73029	0.839074	1.44461	1.07769	1.32759	1.22992	1.71659	1.03728	0.341419	0.895847	1.11596	0.918443	1.88798	1.1821	0.661729	1.13172	0.607141	0.614893	0.891737	0.682512	0.941021
ENSMUSG00000044674	Fzd1	frizzled class receptor 1 [Source:MGI Symbol;Acc:MGI:1196625]	4196	blue	-0.0151381	0.841494	-0.000441322	0.995349	-0.778397	3.17998e-37	0.162349	0.0308543	-0.388981	8.76549e-08	0.718126	2.33585e-29	0.0993955	0.188085	0.912639	6.71893e-70	-0.924493	3.27423e-75	3.49997	1.06668	0.47291	3.16058	0.907838	1.05783	3.2075	1.06836	0.846523	3.3233	0.552448	1.32014	3.03693	0.573183	0.580204	3.67463	0.927427	0.755005	3.96419	0.98582	1.14663	3.24283	1.14581	0.897012	2.66742	0.642301	0.996342
ENSMUSG00000015653	Steap2	six transmembrane epithelial antigen of prostate 2 [Source:MGI Symbol;Acc:MGI:1921301]	29749	blue	0.0016591	0.982515	0.0135007	0.858448	-0.753732	9.90276e-34	0.322341	1.21183e-05	-0.25522	0.000607201	0.612727	1.26375e-19	0.121602	0.10689	0.971688	1.3749e-111	-0.963971	1.42001e-102	2.10059	0.238938	0.263773	1.9737	0.388437	0.652778	2.09027	0.908303	0.292966	1.65175	0.54662	0.577869	2.04944	0.498575	0.718874	2.33676	0.384379	0.301908	2.31428	0.443127	0.633871	2.23644	0.4608	0.669646	1.97679	0.396604	0.239309
ENSMUSG00000003161	Sri	sorcin [Source:MGI Symbol;Acc:MGI:98419]	23301	blue	-0.0155718	0.837015	-0.0363995	0.630522	-0.735986	1.8346e-31	0.246965	0.000920158	-0.298974	5.29392e-05	0.497581	1.84373e-12	0.278544	0.000173967	0.880404	1.35391e-58	-0.854565	1.12698e-51	1.98088	1.29014	1.64103	1.8085	1.49292	1.61817	2.16438	1.60474	1.64156	1.75022	1.32904	1.5069	1.89154	1.34326	1.33087	1.95375	1.5442	1.39755	2.0684	1.53943	1.66074	2.02942	1.43476	1.5938	2.11112	1.44193	1.34239
ENSMUSG00000106637	Gm42455	predicted gene 42455 [Source:MGI Symbol;Acc:MGI:5662592]	2735	blue	0.0861224	0.254376	0.113871	0.131263	-0.276242	0.000197798	0.519538	1.26681e-13	0.277787	0.000181495	0.0324097	0.668476	0.0791569	0.294963	0.391748	6.96702e-08	-0.432579	1.82288e-09	1.44354	0.356019	0.261078	0.352665	0	0.271976	0.350198	0	0	0.839835	0.441382	0.25263	1.39293	0	0.464415	1.15327	0.352454	0	0.713972	0	0	0.64593	0.456387	0.249711	0.935451	0	0.284585
ENSMUSG00000105041	Gm42676	predicted gene 42676 [Source:MGI Symbol;Acc:MGI:5662813]	2685	blue	-0.0101128	0.893725	0.0150375	0.842533	-0.466334	6.0835e-11	0.439093	9.7325e-10	0.0546699	0.46985	0.116007	0.124139	0.251842	0.000720999	0.617739	5.26124e-20	-0.608394	2.66168e-19	0.433365	0.361883	0	0.645377	0.424744	0	0	0	0	0.851643	0	0	1.73073	0	0	0.699096	0	0.280864	0.40721	0	0.27595	1.44668	0	0	1.66393	0	0
ENSMUSG00000106048	Gm42444	predicted gene 42444 [Source:MGI Symbol;Acc:MGI:5662581]	4557	blue	0.106826	0.157005	0.0833165	0.270236	-0.490027	4.43631e-12	0.631067	4.73443e-21	0.194276	0.00956705	0.138809	0.0653899	0.175565	0.0194197	0.667183	3.70761e-24	-0.658179	2.41793e-23	0.695401	0	0.308149	0.997974	0.265082	0	1.21358	0.153466	0	0.306872	0	0.156862	1.24265	0	0	0.451394	0	0.172017	0.822609	0	0.456907	0.746653	0.290809	0.154991	0.790942	0.331355	0
ENSMUSG00000105571	Gm43662	predicted gene 43662 [Source:MGI Symbol;Acc:MGI:5663799]	2270	blue	0.0332703	0.660214	-0.0526486	0.486451	-0.227204	0.00235631	0.55783	7.28764e-16	0.339663	3.74318e-06	-0.124067	0.0999127	0.136799	0.069426	0.34988	1.80939e-06	-0.328679	7.94992e-06	1.4102	0	0.563665	1.22316	0	0	0.994973	0	0	0	1.19765	0	0	0	0	0	1.00018	0	0	0	0	1.23932	0.534386	0	0	0	0
ENSMUSG00000104672	Gm43665	predicted gene 43665 [Source:MGI Symbol;Acc:MGI:5663802]	1658	blue	0.0188495	0.803344	0.106845	0.156932	-0.354059	1.33411e-06	0.644282	3.86382e-22	0.316387	1.78544e-05	0.0256004	0.735187	0.147899	0.0494667	0.542666	6.07836e-15	-0.506026	6.73292e-13	1.94	0.547647	0.408421	1.24512	0.636342	0.424624	1.23854	0	0.589753	0.723739	0.669382	0.706094	1.05169	0	0	1.33029	0.542495	0	1.63807	1.31542	0.423695	0.551686	0.690471	0.391459	1.00251	0	0.443295
ENSMUSG00000045435	Tmem60	transmembrane protein 60 [Source:MGI Symbol;Acc:MGI:2673965]	4679	blue	0.0224264	0.767011	0.0701317	0.353629	-0.391055	7.38042e-08	3.12818e-05	0.99967	-0.237991	0.00142373	0.470001	4.10968e-11	0.0256877	0.734318	0.376168	2.47062e-07	-0.420061	5.86823e-09	2.77205	1.91886	2.04641	2.66484	1.90698	2.05413	2.69155	1.90026	2.01508	2.48976	2.12011	2.39255	2.26364	1.45932	1.82894	2.54351	1.63359	2.02973	2.30157	2.28351	2.48452	2.79535	1.85201	2.18099	2.07047	2.00632	2.06576
ENSMUSG00000094832	Gm21846	predicted gene, 21846 [Source:MGI Symbol;Acc:MGI:5434010]	3072	blue	0.000526059	0.994455	0.0845121	0.263398	-0.28641	0.000111219	0.516691	1.81245e-13	0.244085	0.00106039	0.0785637	0.298608	0.0715891	0.343691	0.435983	1.31538e-09	-0.480289	1.33334e-11	1.15378	0	0	0.317928	0	0	0.984326	0.222179	0	1.26688	0.399053	0	1.29144	0	0	0	0	0.808498	0.65083	0	0.634787	0.32354	0	0.418436	0.345732	0.467807	0.25597
ENSMUSG00000028945	Rheb	Ras homolog enriched in brain [Source:MGI Symbol;Acc:MGI:97912]	39801	blue	-0.105076	0.163953	-0.00991139	0.89583	-0.600341	1.03183e-18	-0.317787	1.63116e-05	-0.65002	1.25213e-22	0.630652	5.11247e-21	0.199439	0.0077826	0.532988	2.22806e-14	-0.529565	3.49308e-14	2.0754	1.90702	1.69403	1.91771	1.89728	1.70784	2.01418	1.69994	1.61427	2.10796	1.75942	1.81221	2.24929	1.80495	1.80411	2.07644	1.73117	1.78064	2.25158	1.79937	1.56675	1.97452	1.6891	1.78293	1.6944	1.80041	1.90386
ENSMUSG00000039095	En2	engrailed 2 [Source:MGI Symbol;Acc:MGI:95390]	6472	blue	0.0185953	0.805943	0.0274674	0.716673	-0.848002	3.95967e-50	0.269889	0.000280312	-0.324348	1.06148e-05	0.606815	3.48266e-19	0.22268	0.00289126	0.962845	1.99499e-101	-0.953764	2.73691e-93	3.67516	0	0	3.28934	0	0	3.54612	0.109733	0	3.37098	0.203197	0	3.78466	0	0.311181	3.84007	0	0	3.5302	0	0.120948	3.31464	0	0.213767	2.89274	0	0
ENSMUSG00000025747	Tyms	thymidylate synthase [Source:MGI Symbol;Acc:MGI:98878]	15415	blue	-0.0384381	0.611488	0.0917686	0.224436	-0.426118	3.35288e-09	0.368698	4.42971e-07	0.0104703	0.889991	0.244479	0.00104011	0.108095	0.152111	0.591512	4.36455e-18	-0.632132	3.88605e-21	0.242558	0.0699211	0.0499045	0.135225	0.083558	0.0521497	0.314667	0.179792	0	0.433328	0.17249	0.307644	0.299607	0.262038	0.0478025	0.406862	0	0.0530214	0.700298	0.146331	0.10223	0.585925	0.0922345	0.0475771	0.571137	0.204961	0.158424
ENSMUSG00000086815	3110082J24Rik	RIKEN cDNA 3110082J24 gene [Source:MGI Symbol;Acc:MGI:3641994]	2502	blue	-0.0727081	0.336181	0.0158635	0.834005	-0.54142	7.20212e-15	0.0845943	0.262932	-0.278461	0.000174772	0.393481	6.02704e-08	0.156054	0.0380621	0.611381	1.59472e-19	-0.583894	1.46304e-17	1.86078	1.33901	0.901023	2.11429	1.67998	1.37154	2.37976	0.689992	1.22562	2.00788	0.476366	0.504262	2.07024	0.494709	0.698383	0.739062	0.381285	1.25329	2.05302	0.729184	0	1.34673	0.858783	1.40737	2.49948	0.556072	1.41606
ENSMUSG00000038803	Ost4	oligosaccharyltransferase complex subunit 4 (non-catalytic) [Source:MGI Symbol;Acc:MGI:1914945]	1903	blue	-0.0640985	0.396658	0.0230684	0.76054	-0.403117	2.6519e-08	0.0337419	0.655703	-0.228335	0.00223744	0.386897	1.04058e-07	0.0779501	0.302409	0.403858	2.48697e-08	-0.435348	1.39832e-09	2.30885	0.851613	1.09789	1.13354	0.975277	1.13268	1.91225	1.05317	0.910694	1.09435	2.03079	0.868009	1.73857	1.05351	1.06459	2.17594	1.37344	1.33125	1.50616	0.898961	1.31444	2.08632	0.618038	0.85978	1.45868	0.694464	0.956197
ENSMUSG00000006641	Slc5a6	solute carrier family 5 (sodium-dependent vitamin transporter), member 6 [Source:MGI Symbol;Acc:MGI:2660847]	12888	blue	0.0518339	0.493231	0.129705	0.0853114	-0.361477	7.68303e-07	0.205475	0.0060763	-0.14432	0.0553029	0.722744	6.91769e-30	-0.311894	2.37895e-05	0.67546	6.23772e-25	-0.743001	2.45094e-32	1.535	0.50159	0.74292	1.69291	0.651276	0.91113	1.33105	1.34922	0.176234	1.37426	0.382731	0.951655	1.44647	0.843244	1.59203	1.24116	0.612147	0.852764	1.84067	0.532953	1.0384	1.51482	0.706392	1.19109	1.52199	0.630183	0.910138
ENSMUSG00000106864	Gtf3c2	general transcription factor IIIC, polypeptide 2, beta [Source:MGI Symbol;Acc:MGI:1919002]	24139	blue	-0.0760976	0.314079	0.0501596	0.507318	-0.439513	9.3422e-10	0.581493	2.12785e-17	0.205655	0.00603103	0.0396557	0.600241	0.246617	0.000936171	0.604461	5.18376e-19	-0.588205	7.40768e-18	1.56005	1.07719	0.908098	1.3254	1.17414	1.12121	1.51989	1.2493	1.10072	1.52573	1.06687	1.05947	1.3903	1.10078	0.944925	1.41382	1.1111	0.950342	1.35603	1.24087	0.80759	1.22881	1.40285	1.09407	1.66499	0.981741	0.9367
ENSMUSG00000029145	Eif2b4	eukaryotic translation initiation factor 2B, subunit 4 delta [Source:MGI Symbol;Acc:MGI:95300]	5872	blue	-0.0687286	0.363366	-0.124935	0.0975454	-0.351649	1.59122e-06	-0.149485	0.0470496	-0.366633	5.19246e-07	0.27071	0.000268095	0.148589	0.0484024	0.367357	4.91203e-07	-0.298415	5.47563e-05	3.14575	2.98355	3.00399	2.87184	2.97957	2.95681	3.27821	2.96238	2.77528	2.7837	2.84156	3.05472	2.81949	2.59796	3.13467	3.23423	3.01598	2.72282	3.10519	2.94968	2.8417	3.0644	2.78506	2.80428	3.3517	2.96582	3.03758
ENSMUSG00000029148	Nrbp1	nuclear receptor binding protein 1 [Source:MGI Symbol;Acc:MGI:2183436]	10702	blue	-0.0163827	0.828654	-0.0937917	0.214342	-0.422745	4.58544e-09	-0.255723	0.000591735	-0.496261	2.15274e-12	0.454393	2.11379e-10	0.092438	0.22106	0.389565	8.35234e-08	-0.374407	2.83883e-07	2.68934	2.40373	2.55259	2.52143	2.49516	2.43311	2.63125	2.53087	2.56774	2.24314	2.45466	2.6056	2.99667	2.48288	2.35746	2.77946	2.42887	2.54915	2.67809	2.60269	2.49924	2.72874	2.54839	2.65815	2.8203	2.48994	2.52025
ENSMUSG00000029149	Krtcap3	keratinocyte associated protein 3 [Source:MGI Symbol;Acc:MGI:1917065]	1511	blue	0.0391039	0.605327	-0.0312098	0.680063	-0.254223	0.000638921	0.245051	0.00101131	-0.025236	0.738819	0.318691	1.5383e-05	-0.0719179	0.341473	0.483608	9.19931e-12	-0.481098	1.21851e-11	0.698319	0.591313	0	0	0	1.08851	1.57974	0	1.07604	0	0.720566	0.42911	1.74618	0	0.426203	0	0	0	0.659471	0	0	1.83008	0	0.751969	0.632783	0	0.479955
ENSMUSG00000019295	Tmem129	transmembrane protein 129 [Source:MGI Symbol;Acc:MGI:1915616]	5200	blue	-0.0912259	0.2272	0.0535072	0.479362	-0.450337	3.19198e-10	-0.0836944	0.268062	-0.378198	2.10262e-07	0.539367	9.50882e-15	0.0194832	0.796874	0.494774	2.56131e-12	-0.503327	9.31824e-13	1.58019	1.1228	0.955337	1.67117	0.913657	0.818699	1.37268	1.24916	0.215385	2.11218	0.460992	1.07534	1.68872	0.837732	0.925104	1.83814	0.3686	0.736254	1.67314	0.963005	0.521417	1.39709	1.12053	1.19665	1.28676	0.747433	0.939247
ENSMUSG00000057406	Nsd2	nuclear receptor binding SET domain protein 2 [Source:MGI Symbol;Acc:MGI:1276574]	77250	blue	0.0340736	0.652539	0.0302356	0.689525	-0.611482	1.56705e-19	0.228622	0.00220812	-0.168104	0.0253141	0.163779	0.0293891	0.344097	2.73897e-06	0.568887	1.44815e-16	-0.533011	2.22144e-14	1.37593	1.49232	1.42901	1.53705	1.34194	1.32946	1.68168	1.31598	1.52359	1.31966	1.6161	1.38174	1.45347	1.52003	1.39703	1.55559	1.51679	1.35685	1.55497	1.46887	1.49415	1.47484	1.60501	1.47836	1.5864	1.46025	1.32062
ENSMUSG00000079555	Haus3	HAUS augmin-like complex, subunit 3 [Source:MGI Symbol;Acc:MGI:2387633]	15647	blue	-0.0161341	0.831215	0.0547236	0.469413	-0.685491	6.64503e-26	0.429466	2.44896e-09	-0.0727619	0.335823	0.241425	0.00120702	0.317185	1.69587e-05	0.768119	1.02476e-35	-0.741069	4.29522e-32	1.28865	0.621199	0.536817	1.01183	0.769711	0.756165	1.1995	0.477426	0.618334	0.815027	0.322203	0.7098	1.3739	0.887743	0.517493	1.35126	0.615491	0.635247	1.36004	0.658486	0.844602	1.22197	0.832277	0.612107	1.2198	0.983713	0.580629
ENSMUSG00000037235	Mxd4	Max dimerization protein 4 [Source:MGI Symbol;Acc:MGI:104991]	13837	blue	-0.0831905	0.270964	-0.0135849	0.857574	-0.3374	4.38171e-06	-0.210549	0.00490922	-0.458674	1.35995e-10	0.532145	2.49022e-14	-0.0840113	0.266248	0.457735	1.49881e-10	-0.419097	6.40866e-09	3.00052	2.95408	2.98204	3.0965	2.77519	2.97234	3.01069	3.03052	2.94796	2.82551	2.75064	2.88612	2.94212	3.01798	3.09487	2.8899	2.91911	2.97077	3.06017	2.92606	2.90757	3.01584	2.76773	3.02398	3.27162	2.60927	3.17262
ENSMUSG00000086291	Gm15513	predicted gene 15513 [Source:MGI Symbol;Acc:MGI:3782961]	1992	blue	0.0095873	0.899217	0.0876329	0.246109	-0.648235	1.78231e-22	0.464216	7.61423e-11	-0.0218704	0.772628	0.263317	0.000398483	0.290413	8.81217e-05	0.714304	6.27859e-29	-0.707305	3.68426e-28	2.25646	0.822585	0.861635	2.14465	0	0.650474	2.13583	0	0	1.89186	0.576667	0.336579	1.22625	0.598136	0.833584	0.880015	0.464615	0.659361	2.30922	0	0.889372	1.1131	0.595401	1.19992	1.41708	1.1252	0.377839
ENSMUSG00000106678	Gm43457	predicted gene 43457 [Source:MGI Symbol;Acc:MGI:5663594]	2408	blue	0.0269163	0.722121	0.0178562	0.813513	-0.336542	4.65007e-06	0.431173	2.08367e-09	0.122382	0.104641	0.0747382	0.322827	0.150102	0.0461366	0.485048	7.82099e-12	-0.455142	1.95757e-10	0	0.966204	0.536674	1.52964	0.466459	0.771379	1.16876	1.04406	0.430504	0.534612	0	0	1.07598	0	0.719833	0	0	0.781515	1.82596	0	0.304556	0.714962	0	0.280517	0.757821	0	0.319238
ENSMUSG00000060708	Bloc1s4	biogenesis of lysosomal organelles complex-1, subunit 4, cappuccino [Source:MGI Symbol;Acc:MGI:1929230]	1272	blue	-0.0110296	0.884155	-0.0735165	0.330822	-0.271503	0.000256754	0.037079	0.624149	-0.233436	0.00176616	0.401131	3.14762e-08	-0.000191989	0.997976	0.486489	6.64358e-12	-0.456248	1.74743e-10	4.48854	4.20574	3.9544	4.44887	3.80808	3.80076	4.18039	4.16094	4.17904	4.35969	3.96546	4.1924	4.41136	4.09519	4.14886	4.62583	4.28136	3.82338	4.34162	4.15526	3.97115	4.47575	3.94499	4.44108	4.06143	3.89481	3.72142
ENSMUSG00000048450	Msx1	msh homeobox 1 [Source:MGI Symbol;Acc:MGI:97168]	4098	blue	0.0319944	0.672477	0.101977	0.176817	0.109733	0.145961	0.373652	3.01246e-07	0.227736	0.00229965	0.503114	9.55904e-13	-0.585793	1.08529e-17	0.417233	7.59243e-09	-0.48328	9.54475e-12	2.22438	0.247074	1.04205	2.05027	0.291953	2.32634	1.83472	2.42448	0.861757	2.30847	0	1.92977	2.16119	0.321621	2.50813	1.15414	0	0.644563	2.8473	0.263968	0.975826	2.07168	0	2.46995	1.01077	0	1.20776
ENSMUSG00000029126	Nsg1	neuron specific gene family member 1 [Source:MGI Symbol;Acc:MGI:109149]	22715	blue	-0.0320175	0.672255	-0.0498422	0.510012	-0.862491	1.20344e-53	0.0407546	0.590172	-0.532981	2.23021e-14	0.624139	1.67934e-20	0.286655	0.000109653	0.919179	9.92481e-73	-0.879439	2.61821e-58	4.59899	3.12389	3.33973	4.58933	3.14572	3.39467	4.64477	3.28674	3.15783	4.53644	3.40733	3.31667	4.81438	3.15129	3.32634	4.9471	3.49345	3.33555	4.77843	3.22204	3.40501	4.72418	3.18734	3.29022	4.91417	2.84076	3.36011
ENSMUSG00000067365	Tmem128	transmembrane protein 128 [Source:MGI Symbol;Acc:MGI:1913559]	9449	blue	-0.0559271	0.459683	0.0978964	0.194867	-0.479994	1.37783e-11	0.159267	0.0342227	-0.184402	0.014009	0.606022	3.98328e-19	-0.0523157	0.489215	0.624755	1.50243e-20	-0.694632	7.97272e-27	1.48137	0.404963	0.427085	0.642538	0.256471	0.238968	0.482961	0.463526	0.235383	2.25466	0.271653	0.529221	1.21281	0.519275	0.411167	1.47076	0.642189	0.631937	1.46504	0.33483	0.309864	1.30521	0.147573	0.285446	0.769193	0.457921	0.171507
ENSMUSG00000107134	Gm42528	predicted gene 42528 [Source:MGI Symbol;Acc:MGI:5662665]	3417	blue	0.0209735	0.781713	0.0645097	0.39363	-0.679034	2.83736e-25	0.318685	1.53892e-05	-0.215238	0.00401388	0.511848	3.30758e-13	0.100137	0.184794	0.873945	1.00634e-56	-0.857142	2.65382e-52	2.10562	1.22907	1.37173	2.49942	1.52756	1.49906	2.49004	1.4041	1.30462	2.43973	1.83925	1.65284	2.69299	1.4839	2.01422	2.14713	1.47092	1.67602	1.72522	0.973181	1.31656	2.8735	0.921056	1.14406	2.66812	1.02361	1.03367
ENSMUSG00000105326	6030400A10Rik	RIKEN cDNA 6030400A10 gene [Source:MGI Symbol;Acc:MGI:1924319]	1211	blue	0.0376991	0.618359	0.203917	0.00648126	-0.350732	1.701e-06	0.531153	2.83709e-14	0.214419	0.00415891	0.368868	4.37201e-07	-0.107701	0.153619	0.554139	1.23355e-15	-0.647794	1.94444e-22	1.73576	0	0	2.04511	0.814768	0	1.79988	0.883393	0	2.6671	0	0.51825	2.43483	0.883695	0	1.2524	0	0.965721	1.66411	0.747967	0	1.8282	0	0	0.754409	1.55737	0
ENSMUSG00000105519	E430021H15Rik	RIKEN cDNA E430021H15 gene [Source:MGI Symbol;Acc:MGI:2444377]	3458	blue	-0.0373661	0.621466	0.0580111	0.443102	-0.613177	1.16884e-19	0.506183	6.6068e-13	0.00627287	0.933959	0.339902	3.68093e-06	0.197456	0.00842955	0.817537	8.38726e-44	-0.818799	4.84837e-44	1.89552	0.288501	0.210261	1.46056	0	0.40944	2.01511	0.798712	0.9771	2.42571	0	0.381535	2.119	0.374015	0.201858	1.29416	0.285546	0.737698	1.18021	0	0.408539	2.12102	0.66776	0.67612	2.04523	0.422504	0.427536
ENSMUSG00000104852	Gm43201	predicted gene 43201 [Source:MGI Symbol;Acc:MGI:5663338]	3415	blue	-0.0136225	0.857184	0.143016	0.0575656	-0.162097	0.0311178	0.59465	2.62742e-18	0.362427	7.15169e-07	0.102442	0.174838	-0.0753747	0.318712	0.416359	8.21763e-09	-0.455392	1.90811e-10	0.869038	0.291789	0.212723	0.735809	0	0.413921	0.526129	0.535372	0	0.962627	0.653772	0	0.833003	0.378157	0.204228	0	0	0.22525	1.19032	0.567414	0.413012	0.92948	0.3763	0.381485	1.29959	0	0.764309
ENSMUSG00000106408	Gm43321	predicted gene 43321 [Source:MGI Symbol;Acc:MGI:5663458]	2408	blue	0.0591586	0.434118	0.117963	0.117879	-0.571861	9.27878e-17	0.644638	3.60524e-22	0.183049	0.0147401	0.342312	3.10763e-06	0.0940149	0.213248	0.743395	2.18503e-32	-0.795867	5.54637e-40	3.00582	0.398239	0.293149	2.05145	0	0.95794	2.33816	0.510769	0	3.03154	0.492117	0	2.23077	0	0.281745	2.37052	0.394306	0.309927	1.49476	0.424049	0.304556	2.53874	0	0	1.44749	0.983485	0.801584
ENSMUSG00000105922	Gm42769	predicted gene 42769 [Source:MGI Symbol;Acc:MGI:5662906]	1658	blue	0.0448083	0.55371	0.0893679	0.236846	-0.672601	1.16216e-24	0.533294	2.1399e-14	0.0326878	0.665801	0.399357	3.66472e-08	0.189363	0.0115916	0.797872	2.57162e-40	-0.815709	1.84139e-43	3.69105	0	0.726365	2.5909	1.0764	0	3.39467	0.387899	0	2.47514	0.669382	0	3.17747	0.693548	0	2.18076	0	0.762219	2.05961	0.994581	0.423695	2.91096	0	0.699052	2.17383	0	0.443295
ENSMUSG00000106579	Gm42771	predicted gene 42771 [Source:MGI Symbol;Acc:MGI:5662908]	2485	blue	0.176262	0.0189349	0.169458	0.0241424	-0.451573	2.81692e-10	0.65679	3.21052e-23	0.277026	0.000189361	0.203041	0.00671943	0.0517798	0.493682	0.594283	2.78865e-18	-0.62426	1.6432e-20	1.70994	0	0	0.936838	0.454056	0.296701	1.32877	0.270019	0.418925	1.20412	0.479138	0.50717	1.05229	0.866845	0.273792	0.41882	0.383575	0.301259	1.46562	0	0.296024	1.35271	0	0	1.74129	0.559225	0
ENSMUSG00000106648	Gm43176	predicted gene 43176 [Source:MGI Symbol;Acc:MGI:5663313]	2988	blue	-0.0296475	0.695261	0.0336419	0.656659	-0.478703	1.58993e-11	0.382573	1.47987e-07	-0.00407211	0.957101	0.252276	0.000705357	0.13504	0.0731205	0.628753	7.25262e-21	-0.651201	9.9001e-23	1.53062	0.329056	0.446949	0.591622	0	0	0	0	0	1.05967	0	0	1.31523	0	0	0.356292	0	0.254748	0.665481	0	0	0.601154	0	0	1.56016	0	0.262549
ENSMUSG00000029169	Dhx15	DEAH (Asp-Glu-Ala-His) box polypeptide 15 [Source:MGI Symbol;Acc:MGI:1099786]	40311	blue	-0.0132198	0.861362	-0.0249707	0.741467	-0.567382	1.81079e-16	0.260963	0.000451017	-0.137731	0.0675307	0.177913	0.0178295	0.339065	3.90259e-06	0.64094	7.36618e-22	-0.574895	5.86551e-17	1.53125	1.31104	1.41626	1.88233	1.46244	1.37326	1.58231	1.32031	1.30725	1.35281	1.26808	1.37689	1.53487	1.41986	1.3482	1.65018	1.30129	1.30712	1.70446	1.12686	1.2822	1.69667	1.30116	1.33669	1.46159	1.39754	1.39365
ENSMUSG00000072941	Sod3	superoxide dismutase 3, extracellular [Source:MGI Symbol;Acc:MGI:103181]	7627	blue	-0.000894356	0.990574	0.0246666	0.744506	-0.375901	2.52331e-07	0.277616	0.000183234	-0.0118263	0.875852	0.284841	0.000121724	0.0458105	0.544867	0.540714	7.92576e-15	-0.517827	1.57162e-13	1.31044	0.928504	0.279064	0.921215	0	0.456251	1.05915	0.740371	0.730022	0.772381	0.329623	0.69389	1.19084	0.34297	0.562305	1.06864	0	0.462894	1.66963	0.978854	0.103271	1.14737	0	1.23589	0.986695	0.693379	0.304026
ENSMUSG00000039252	Lgi2	leucine-rich repeat LGI family, member 2 [Source:MGI Symbol;Acc:MGI:2180196]	32945	blue	0.0356214	0.637852	0.056254	0.45706	-0.406376	1.99696e-08	0.401213	3.12545e-08	0.00874322	0.90805	0.278018	0.000179159	-0.0225252	0.766014	0.620969	2.96643e-20	-0.593324	3.25807e-18	1.70306	1.30091	1.6283	1.80025	1.49237	1.29085	1.77299	1.59371	1.58867	1.45292	1.53684	1.71713	1.40432	1.42087	1.38286	1.86486	1.64917	1.63316	1.63213	1.54747	1.53093	1.60381	1.48113	1.24173	1.83817	1.32192	1.46255
ENSMUSG00000061461	Smim20	small integral membrane protein 20 [Source:MGI Symbol;Acc:MGI:1913528]	11457	blue	-0.0047427	0.950045	0.00958109	0.899282	-0.486107	6.93727e-12	0.302653	4.23171e-05	-0.063086	0.404174	0.133141	0.0772862	0.254192	0.00063993	0.554005	1.25712e-15	-0.556286	9.08994e-16	1.48877	0.901953	1.09527	1.25593	1.03066	1.09698	1.40033	0.987058	0.963499	1.4809	0.67633	1.00366	1.35204	0.987385	0.748388	1.21105	0.944747	0.968637	1.24835	0.442625	0.758386	0.743368	1.32773	1.14925	1.70083	1.22345	0.992074
ENSMUSG00000107182	Gm43268	predicted gene 43268 [Source:MGI Symbol;Acc:MGI:5663405]	4054	blue	0.171579	0.0224013	0.0895515	0.23588	-0.189811	0.0113926	0.198501	0.00808303	-0.0268051	0.723222	0.514502	2.38161e-13	-0.338586	4.03518e-06	0.415122	9.18764e-09	-0.472013	3.30743e-11	1.73144	1.21523	1.45407	1.61118	0	1.34459	0.637884	0.813104	1.29025	0.847432	0.568436	1.19605	1.57273	0.589657	1.4143	1.51513	0.951193	1.51121	0.720694	1.39157	1.08193	1.71634	0.586953	0.920221	1.15782	1.11165	1.02133
ENSMUSG00000105637	Gm42480	predicted gene 42480 [Source:MGI Symbol;Acc:MGI:5662617]	2594	blue	0.0510386	0.499896	0.134884	0.0734559	-0.361578	7.62497e-07	0.430806	2.15749e-09	0.176723	0.0186205	0.197775	0.00832251	0.0758593	0.315601	0.435943	1.32044e-09	-0.504083	8.51057e-13	1.82322	0	0	1.11628	0	0.285388	0.367001	0	0.403565	1.62384	0	0	1.02055	0.479779	0.263275	1.1958	0.663158	0	1.00912	0	0.522428	0.920803	0	0.262121	1.38044	0.539613	0.298556
ENSMUSG00000105049	Gm42486	predicted gene 42486 [Source:MGI Symbol;Acc:MGI:5662623]	3485	blue	-0.0103386	0.891366	0.0966519	0.200631	-0.296002	6.33e-05	0.482239	1.07266e-11	0.239059	0.00135279	0.0152804	0.840023	0.134381	0.0745442	0.395576	5.05302e-08	-0.441008	8.07281e-10	1.3894	0.286473	0.208745	0.520694	0.337711	0	0.281681	0.37131	0	1.16332	0.357136	0	0.327953	0	0	0.782865	0	0	0	0.305787	0	0.288778	0	0	0.779145	0	0
ENSMUSG00000105694	Gm43237	predicted gene 43237 [Source:MGI Symbol;Acc:MGI:5663374]	1043	blue	-0.0216807	0.774546	0.0524929	0.487743	-0.314377	2.03126e-05	0.541977	6.67661e-15	0.242402	0.00115115	0.138293	0.066408	0.0555211	0.462953	0.509327	4.50726e-13	-0.546527	3.57782e-15	2.87064	1.30327	0	0.787553	0.911709	0.626685	0.782764	0.98606	0	2.36242	0	0.586727	2.14119	0	1.3183	2.72632	1.29355	0	3.35541	0	2.08944	0.799463	1.56144	0	2.06707	1.08956	0
ENSMUSG00000105935	Gm43628	predicted gene 43628 [Source:MGI Symbol;Acc:MGI:5663765]	1186	blue	-0.0525785	0.487032	0.00491263	0.948257	-0.392862	6.34767e-08	0.445512	5.17625e-10	0.0940517	0.213068	0.241938	0.00117735	0.111727	0.138731	0.584181	1.39854e-17	-0.601872	7.99891e-19	0.842559	0	0.54346	1.18725	0	0	1.18086	0	0	1.49643	0.868175	0	1.32191	0	0	0.770415	0	0.571982	0.797681	0	0	1.84988	0	0.521831	1.26474	0	0
ENSMUSG00000106291	1110003F10Rik	RIKEN cDNA 1110003F10 gene [Source:MGI Symbol;Acc:MGI:1915726]	766	blue	0.0126253	0.867539	0.0202521	0.789042	-0.490215	4.34121e-12	0.49613	2.18618e-12	0.0829827	0.272167	0.170925	0.0229264	0.190882	0.0109287	0.653834	5.8412e-23	-0.651777	8.82542e-23	3.06505	0	0	1.57408	0	0	2.29976	1.22369	0	3.24191	1.1877	0.751301	2.49693	1.22407	1.60117	1.06539	0	0.810113	2.47832	1.65455	0	2.33138	0	1.23231	2.68483	0	1.35454
ENSMUSG00000037822	Smim14	small integral membrane protein 14 [Source:MGI Symbol;Acc:MGI:1915802]	90340	blue	-0.124409	0.0989739	0.0751317	0.320278	-0.417798	7.21317e-09	0.182632	0.0149727	-0.208984	0.00524566	0.759282	1.76388e-34	-0.242774	0.00113051	0.742598	2.75687e-32	-0.778341	3.242e-37	1.24134	0.845198	0.993446	1.19073	0.859145	1.02597	1.31064	1.03778	0.96002	1.66177	0.787408	1.02651	1.33692	0.904803	1.06106	1.32783	1.02182	1.06068	1.40476	0.711525	1.00623	1.12415	0.705625	0.915901	1.07382	0.82246	1.00723
ENSMUSG00000105601	Gm42725	predicted gene 42725 [Source:MGI Symbol;Acc:MGI:5662862]	4192	blue	-0.115817	0.124761	0.0480039	0.52576	-0.405246	2.20411e-08	0.347455	2.15512e-06	0.0149324	0.84362	0.212102	0.0045946	0.124172	0.0996256	0.549783	2.27618e-15	-0.594244	2.8067e-18	0.924237	0	0	0.624812	0	0	0.237866	0.166087	0	0.826178	0	0	0.510325	0	0	0.484754	0	0	0.503615	0	0	0.452554	0	0	0.261165	0	0.36125
ENSMUSG00000107362	Gm40309	predicted gene, 40309 [Source:MGI Symbol;Acc:MGI:5623194]	1751	blue	0.0574809	0.447288	0.0508782	0.501246	-0.508899	4.7491e-13	0.650633	1.10855e-22	0.243682	0.00108147	0.050023	0.508477	0.247434	0.000899036	0.599781	1.13203e-18	-0.615794	7.4063e-20	2.25124	0.906394	0.695731	1.66115	0	0.404954	2.62048	0.36972	0.56381	1.15944	0	0	2.01718	1.11699	0	1.95166	0.898779	0.410952	1.00011	0.555712	0.404062	1.46688	1.11265	0.373134	2.26325	0.741535	0.42288
ENSMUSG00000106767	Gm42727	predicted gene 42727 [Source:MGI Symbol;Acc:MGI:5662864]	2822	blue	-0.0478603	0.527001	0.0866395	0.251524	-0.577104	4.18746e-17	0.438615	1.01957e-09	-0.0177208	0.814901	0.269221	0.000290634	0.200572	0.00743327	0.741817	3.45906e-32	-0.733719	3.46782e-31	1.87458	0	0.253696	0.342987	0	0	1.04619	0	0	1.10316	1.029	0	0.705218	0.786854	0	0.671945	0	0	0.696504	0.369115	0	1.24388	0	0.242625	1.12376	0	0
ENSMUSG00000106978	N4bp2os	NEDD4 binding protein 2, opposite strand [Source:MGI Symbol;Acc:MGI:1921484]	3388	blue	0.0657937	0.384262	0.139099	0.064825	-0.273804	0.000226347	0.180278	0.0163433	-0.112755	0.135111	0.578268	3.50286e-17	-0.265073	0.000363048	0.570201	1.19014e-16	-0.604134	5.4771e-19	1.25603	0	0.400842	0.533154	0.346305	0.587293	0.916197	1.04037	0.579429	1.69227	0.366165	0.207257	1.3647	0	0.545816	1.16046	0.290889	0.226911	1.61711	0.571147	0.875986	1.37609	0.378937	0.817817	1.15555	0.430052	0.76903
ENSMUSG00000107304	Gm43775	predicted gene 43775 [Source:MGI Symbol;Acc:MGI:5663912]	3840	blue	-0.041577	0.582687	0.0340758	0.652518	-0.420163	5.81357e-09	0.313066	2.20844e-05	-0.0313082	0.679109	0.173686	0.0207796	0.187752	0.0123328	0.57638	4.67793e-17	-0.579704	2.80779e-17	0.985477	0	0	0	0.309603	0.198823	0	0	0	1.26688	0.327588	0	1.2569	0	0.182996	1.33676	0	0	1.09771	0	0	0.851577	0	0.48931	1.33139	0	0.208281
ENSMUSG00000107155	Gm43793	predicted gene 43793 [Source:MGI Symbol;Acc:MGI:5663930]	1332	blue	-0.0719541	0.34123	0.00440676	0.953579	-0.503573	9.04727e-13	0.473625	2.77627e-11	0.0653023	0.387831	0.275984	0.000200658	0.15422	0.0404126	0.654826	4.78196e-23	-0.679313	2.66704e-25	2.38893	0	0.492952	2.14129	0	0.889053	1.93379	0.468831	0.703617	1.39055	1.68017	0.836658	2.11733	0.822384	0.474959	2.05033	0.649121	0.519272	2.30576	0	0	2.33874	0	1.11372	2.4254	0.913284	0.533805
ENSMUSG00000106772	Gm43794	predicted gene 43794 [Source:MGI Symbol;Acc:MGI:5663931]	691	blue	0.025788	0.733319	0.148921	0.0478986	-0.247908	0.00087812	0.353725	1.36718e-06	0.0789895	0.295988	0.208631	0.00532451	-0.0502053	0.506931	0.408041	1.72551e-08	-0.409487	1.51899e-08	2.34607	0	0.836061	0	0	1.40178	1.66668	0	0	0	0	0	0	0	0.80863	0	0	0	0	1.75763	0	1.6939	0	0	0	0	0.897695
ENSMUSG00000107091	Gm43343	predicted gene 43343 [Source:MGI Symbol;Acc:MGI:5663480]	1925	blue	-0.0123696	0.870198	0.119352	0.113583	-0.456213	1.7536e-10	0.513755	2.6129e-13	0.135743	0.0716238	0.202271	0.00693514	0.151521	0.0440924	0.632123	3.89237e-21	-0.656991	3.08175e-23	2.29563	0.483015	0	0.83744	0	0.37268	1.74073	0	0.520997	2.72486	0	0	1.25472	1.37569	0	1.20443	0	0	0.93338	0.51341	0.667233	2.20499	0	0.852358	1.44816	0.68815	0.389362
ENSMUSG00000106720	Gm43795	predicted gene 43795 [Source:MGI Symbol;Acc:MGI:5663932]	2365	blue	0.0489701	0.517452	0.0679536	0.368814	-0.492422	3.36594e-12	0.428802	2.60691e-09	0.0500911	0.507899	0.207908	0.00548885	0.178483	0.0174609	0.572593	8.31039e-17	-0.594767	2.57775e-18	1.37359	0	0	0	0	0	0.398041	0	0	0.542712	0	0	1.08971	0	0.28639	1.46969	0.400565	0	1.07775	0	0.564255	0.985248	0	0	0.434827	0	0.812723
ENSMUSG00000106749	Gm43281	predicted gene 43281 [Source:MGI Symbol;Acc:MGI:5663418]	2703	blue	-0.018127	0.810738	0.067404	0.372708	-0.479973	1.38102e-11	0.428268	2.74131e-09	0.0597959	0.429175	0.186273	0.0130498	0.205331	0.00611283	0.570743	1.0974e-16	-0.590797	4.89575e-18	1.4543	0	0	1.42286	0.422292	0	1.07858	0.25002	0	0.485013	0	0.255371	0.990749	0	0.253538	1.16264	0	0.512966	0.979544	0	0	1.09954	0	0.467188	0.692005	0	0
ENSMUSG00000107319	Gm42670	predicted gene 42670 [Source:MGI Symbol;Acc:MGI:5662807]	1291	blue	0.00902919	0.905056	-0.0390511	0.605815	-0.302832	4.18563e-05	0.207574	0.00556632	-0.0306224	0.685762	0.266443	0.000337466	0.012449	0.869372	0.444257	5.86236e-10	-0.467696	5.26147e-11	1.29715	0	0.506152	1.11989	0.775666	0	1.11374	0.481487	0.721194	0.877076	0.81412	0	1.24973	0	0	1.84536	0.665627	0.921422	1.23665	0	0.908273	1.48266	0	0.48577	1.55244	0	0
ENSMUSG00000107041	Gm42735	predicted gene 42735 [Source:MGI Symbol;Acc:MGI:5662872]	1645	blue	0.0954977	0.206085	0.0317396	0.674937	-0.331228	6.69192e-06	0.565607	2.35342e-16	0.29587	6.3802e-05	0.101467	0.178999	0.0901144	0.232937	0.433644	1.64666e-09	-0.476916	1.93642e-11	2.14775	0.551244	1.21367	1.2517	0	0.427528	1.49933	0.390585	0	1.57037	0	0.398553	1.05758	0.697893	0.395825	1.60186	0.546063	0.766891	1.37679	0	0.426594	1.74304	0	0	1.5959	0	0
ENSMUSG00000107136	Gm42466	predicted gene 42466 [Source:MGI Symbol;Acc:MGI:5662603]	1300	blue	0.0747468	0.322771	0.104771	0.165188	-0.531183	2.82624e-14	0.549771	2.28027e-15	0.152733	0.0424064	0.0695871	0.357388	0.29202	8.0182e-05	0.590952	4.77574e-18	-0.596987	1.79396e-18	2.41738	0.667978	0.875541	2.50099	0	0.522524	2.98842	0	1.55197	3.08368	0.809806	0.852202	2.53344	1.7492	0.847157	1.55169	1.11397	0.9167	1.59487	0.707446	0.521417	1.75544	1.35935	0.482912	2.61337	0.929845	0.939247
ENSMUSG00000107208	D130004A15Rik	RIKEN cDNA D130004A15 gene [Source:MGI Symbol;Acc:MGI:2140783]	1576	blue	0.130089	0.0843826	0.0733706	0.331785	-0.562836	3.53245e-16	0.577892	3.7113e-17	0.0925082	0.220707	0.284164	0.000126539	0.14138	0.0605106	0.737439	1.21555e-31	-0.73041	8.68389e-31	1.99446	0	0	1.54708	0	0	1.28115	0	0	0.75305	0	0	1.70379	0	0	1.0442	0	0	1.41511	0	0	0.98555	0	0	0.611499	0	0
ENSMUSG00000107363	Gm43373	predicted gene 43373 [Source:MGI Symbol;Acc:MGI:5663510]	2869	blue	0.0750361	0.320896	0.0852373	0.259308	-0.663834	7.50304e-24	0.527019	4.86416e-14	0.00383852	0.959559	0.33339	5.77539e-06	0.175372	0.0195555	0.807002	6.94118e-42	-0.813596	4.52132e-43	2.48303	0	0	0.611613	0	0.480826	1.5025	0.236676	0.369421	1.09047	0	0	1.51611	0	0	0.907084	0	0	1.15109	0	0.259751	1.23016	0	0	0.659845	0	0
ENSMUSG00000106753	Gm43230	predicted gene 43230 [Source:MGI Symbol;Acc:MGI:5663367]	2128	blue	0.0759019	0.315329	0.0990493	0.189636	-0.680735	1.94308e-25	0.514845	2.28208e-13	-0.0250724	0.740451	0.410506	1.38788e-08	0.136324	0.0704087	0.845661	1.35401e-49	-0.854523	1.15361e-51	2.93194	0	0.32764	1.47484	0.51797	0	1.46755	0	0	1.33498	0	0	1.17247	0	0.315034	1.36366	0.439002	0	2.1016	0	0.340237	1.29377	0	0	1.35822	0	0.356436
ENSMUSG00000107312	Gm43229	predicted gene 43229 [Source:MGI Symbol;Acc:MGI:5663366]	1849	blue	0.0312621	0.679556	0.0345173	0.648315	-0.632929	3.35039e-21	0.47093	3.71819e-11	-0.0299881	0.691937	0.329672	7.43539e-06	0.193922	0.0097018	0.75155	1.9266e-33	-0.747164	7.19534e-33	1.01264	0	0	1.39969	0	0.690411	2.21954	0	0	1.46073	0	0.359611	1.28876	0	0	0	0	0	0.961355	0	0	1.80986	0	0.640656	0	0	0.403321
ENSMUSG00000107148	Gm42888	predicted gene 42888 [Source:MGI Symbol;Acc:MGI:5663025]	4360	blue	0.0907104	0.229848	0.0809582	0.284076	-0.696918	4.63334e-27	0.561848	4.07902e-16	0.00484789	0.948938	0.354301	1.31061e-06	0.203901	0.00648568	0.864443	3.76637e-54	-0.857705	1.92817e-52	2.41019	0	0	1.85025	0.275982	0	1.90975	0	0	1.31406	0	0.163562	1.60412	0.304192	0	1.63774	0	0.482397	1.68219	0.461972	0.176081	0.915067	0.302661	0.306937	1.33708	0.855656	0.496065
ENSMUSG00000106992	Gm43167	predicted gene 43167 [Source:MGI Symbol;Acc:MGI:5663304]	1605	blue	0.0225504	0.76576	-0.00838932	0.911756	-0.376858	2.33901e-07	0.428001	2.81098e-09	0.0918766	0.223889	0.229404	0.00213009	0.0239821	0.751361	0.566298	2.12546e-16	-0.612943	1.21716e-19	0.665528	0.562617	1.01015	1.27241	0.653234	1.27148	0	1.18567	0	2.819	0.686959	0.407206	1.68562	0	0	1.85103	0	1.05563	1.39873	0	0.769994	0.972589	1.18152	1.19412	1.61976	0.793338	0
ENSMUSG00000029227	Fip1l1	FIP1 like 1 (S. cerevisiae) [Source:MGI Symbol;Acc:MGI:1914149]	63351	blue	0.0474313	0.530716	-0.00172891	0.981779	-0.130843	0.0825843	0.464587	7.32093e-11	0.216869	0.00373875	0.0464493	0.539268	-0.0318616	0.673759	0.452512	2.56081e-10	-0.389836	8.16672e-08	1.33039	1.21232	1.24505	1.37297	1.34367	1.3502	1.36598	1.35968	1.31048	1.35136	1.2851	1.37091	1.62856	1.36008	1.35012	1.4974	1.12615	1.3025	1.31775	1.21707	1.37309	1.43002	1.39976	1.31313	1.72159	1.30289	1.28152
ENSMUSG00000029247	Paics	phosphoribosylaminoimidazole carboxylase, phosphoribosylaminoribosylaminoimidazole, succinocarboxamide synthetase [Source:MGI Symbol;Acc:MGI:1914304]	16202	blue	-0.121682	0.106658	0.0266424	0.724834	-0.621197	2.84807e-20	-0.023233	0.758884	-0.425546	3.53666e-09	0.634995	2.27662e-21	0.0868843	0.250182	0.68871	3.17772e-26	-0.699619	2.42404e-27	1.96468	1.66601	1.65221	2.24477	1.82901	1.59989	1.95434	1.60973	1.88253	2.46813	1.98565	1.82869	2.24281	1.56469	1.63946	2.19052	1.81662	1.89021	2.24156	1.69352	1.85596	2.22352	1.58977	1.72104	1.93506	1.66839	1.96642
ENSMUSG00000059325	Hopx	HOP homeobox [Source:MGI Symbol;Acc:MGI:1916782]	28133	blue	0.0011102	0.988299	0.061186	0.418505	-0.626239	1.14799e-20	0.162766	0.0304205	-0.328968	7.7967e-06	0.814867	2.63744e-43	-0.122383	0.104638	0.861752	1.8598e-53	-0.901775	1.17475e-65	2.4456	0.701176	1.06988	2.28588	0.861404	1.22103	2.47696	1.42803	0.64659	2.44721	0.538365	1.34722	2.48956	0.628226	1.36124	2.68145	0.832026	0.91228	2.60986	0.370122	0.930018	2.21756	0.591146	1.1576	2.2585	0.972264	1.40791
ENSMUSG00000106598	Gm43532	predicted gene 43532 [Source:MGI Symbol;Acc:MGI:5663669]	3815	blue	0.00520801	0.945151	0.027242	0.7189	-0.544559	4.69179e-15	0.352345	1.51247e-06	-0.0868356	0.250449	0.297178	5.89895e-05	0.203893	0.00648768	0.729619	1.07922e-30	-0.726572	2.4761e-30	0.990148	0	0	0.674074	0	0	0.838218	0.181508	0	1.43229	0.329507	0	1.63152	0	0	1.34246	0	0.38131	1.50395	0	0.199568	1.27325	0	0	1.45652	0	0.209551
ENSMUSG00000054945	Gm9958	predicted gene 9958 [Source:MGI Symbol;Acc:MGI:3641866]	1873	blue	0.158741	0.0348289	0.00463181	0.951211	-0.434998	1.44622e-09	0.339411	3.80962e-06	-0.0258606	0.732598	0.292591	7.7523e-05	0.0690834	0.360888	0.617669	5.32704e-20	-0.590948	4.77873e-18	1.00328	0.861878	0.902274	1.14606	0.986587	0.38177	1.38112	0	0	1.72539	0	1.08257	1.94463	1.06544	0.63648	0.532959	0	0.944326	0.952335	0	0	0.498077	0.626067	0.351557	1.47331	0	0
ENSMUSG00000029397	Rchy1	ring finger and CHY zinc finger domain containing 1 [Source:MGI Symbol;Acc:MGI:1915348]	14164	blue	-0.0120385	0.873643	0.0792135	0.294616	-0.470902	3.72935e-11	0.207516	0.00558003	-0.241803	0.0011851	0.657315	2.88509e-23	-0.110322	0.143795	0.775592	8.35559e-37	-0.791497	2.87505e-39	1.76176	1.7329	1.8189	2.07323	1.46056	1.71519	2.11841	1.99898	1.58968	1.93415	1.4838	1.76638	1.9593	1.63011	1.71071	2.005	1.52117	1.5832	2.03247	1.18775	1.86285	2.11304	1.62465	1.82954	2.01938	1.54131	1.83531
ENSMUSG00000045314	Sowahb	sosondowah ankyrin repeat domain family member B [Source:MGI Symbol;Acc:MGI:1925338]	3899	blue	-0.0249455	0.741718	0.00703726	0.925933	-0.926326	4.1349e-76	-0.0400248	0.59685	-0.507957	5.327e-13	0.20154	0.00714559	0.705514	5.74623e-28	0.630792	4.98154e-21	-0.568282	1.58444e-16	4.53594	3.86264	2.07056	4.48331	3.85174	1.20773	4.44714	1.80423	4.04101	3.78063	3.76052	2.44096	4.81494	3.89835	1.64666	4.73046	3.6384	3.56123	4.48123	3.92016	3.25767	4.49762	3.44871	1.81498	4.49501	3.64006	1.72002
ENSMUSG00000063015	Ccni	cyclin I [Source:MGI Symbol;Acc:MGI:1341077]	24562	blue	-0.00630944	0.933575	0.0588394	0.436607	-0.47503	2.38168e-11	0.0929663	0.21842	-0.287267	0.000105841	0.745685	1.11524e-32	-0.179942	0.0165478	0.651934	8.55299e-23	-0.696169	5.53819e-27	3.63833	3.2397	3.21808	3.56353	3.26411	3.0966	3.65821	3.0655	3.04628	3.62592	3.0097	3.31781	3.51926	3.02974	3.25746	3.52308	3.24396	3.31829	3.57827	3.20274	3.20213	3.47159	2.86749	2.98983	3.38535	2.96388	3.13257
ENSMUSG00000029385	Ccng2	cyclin G2 [Source:MGI Symbol;Acc:MGI:1095734]	8974	blue	-0.0529132	0.484261	0.0794643	0.293085	-0.567843	1.69113e-16	0.0329215	0.663558	-0.395941	4.89967e-08	0.880138	1.62525e-58	-0.162632	0.0305592	0.741512	3.7786e-32	-0.802651	3.9744e-41	2.9466	1.34223	1.10347	2.4744	0.942481	1.40268	2.8804	1.46824	0.804383	3.06039	0.818481	1.96949	2.85687	0.752106	1.67764	3.28801	1.00868	1.55047	3.27562	0.938739	0.912997	2.8981	0.294912	0.942211	2.29083	0.335966	1.2604
ENSMUSG00000029328	Hnrnpdl	heterogeneous nuclear ribonucleoprotein D-like [Source:MGI Symbol;Acc:MGI:1355299]	6087	blue	0.151419	0.0442369	0.107104	0.155923	-0.278962	0.000169935	0.235264	0.00162063	-0.0865932	0.251779	0.512103	3.2052e-13	-0.22884	0.00218617	0.56565	2.33853e-16	-0.545937	3.88141e-15	5.39614	5.37047	5.23053	5.35544	5.24778	5.21598	5.19187	5.00026	5.08214	4.96189	4.81647	5.0551	5.30662	4.71257	5.19622	5.12217	5.11153	5.00429	5.12124	4.83667	4.86657	5.25933	5.12681	5.01104	5.21787	4.84973	5.17689
ENSMUSG00000035234	Abraxas1	BRCA1 A complex subunit [Source:MGI Symbol;Acc:MGI:1917931]	15773	blue	0.0118512	0.875593	-0.105743	0.161278	-0.606757	3.51662e-19	0.326652	9.10682e-06	-0.122721	0.103678	0.282801	0.000136778	0.267742	0.000314755	0.732187	5.31359e-31	-0.7213	1.01492e-29	1.38427	0.617161	0.426506	0.741778	0.714594	0.517708	0.817391	0.332755	0.277783	1.20232	0.456657	0.339678	0.969878	0.47436	0.480363	0.710886	0.741387	0.449806	1.07744	0.273404	0.364078	1.24547	0.718276	0.511942	1.21321	0.67515	0.612922
ENSMUSG00000105607	Gm43513	predicted gene 43513 [Source:MGI Symbol;Acc:MGI:5663650]	1075	blue	0.0576937	0.445605	0.0331231	0.661624	-0.420223	5.78189e-09	0.512382	3.0967e-13	0.142211	0.0589987	0.120071	0.11141	0.160015	0.0333778	0.591556	4.33361e-18	-0.59637	1.98469e-18	2.1701	0.77576	1.00676	1.93286	0	0	1.63084	0	0	2.00514	0	1.29906	0.869812	0.96496	0	1.3546	0	0.619934	1.39456	0	0	1.65775	0	0.56635	1.73185	0	0.636714
ENSMUSG00000087611	4930458D05Rik	RIKEN cDNA 4930458D05 gene [Source:MGI Symbol;Acc:MGI:1923052]	6370	blue	-0.0857778	0.256289	0.0463149	0.540444	-0.367869	4.72228e-07	0.269134	0.000292009	-0.0268053	0.72322	0.122288	0.104912	0.154887	0.0395443	0.473277	2.8834e-11	-0.479328	1.48353e-11	0.37337	0.163721	0	0	0.365796	0.123103	0.160868	0.214855	0	0.593295	0	0	0.188573	0	0	0.479444	0.161973	0	0.35041	0.175257	0	0	0.213832	0	0.606326	0	0.129118
ENSMUSG00000029330	Cds1	CDP-diacylglycerol synthase 1 [Source:MGI Symbol;Acc:MGI:1921846]	58728	blue	-0.0088448	0.906986	0.000555359	0.994147	-0.718723	1.99854e-29	0.0982068	0.193449	-0.402561	2.78247e-08	0.610163	1.9666e-19	0.136378	0.0702948	0.83374	5.23204e-47	-0.804624	1.81113e-41	1.89034	1.60094	1.36724	1.692	1.40238	1.47892	1.77323	1.57806	1.38461	1.93128	1.35056	1.52187	1.82558	1.32115	1.44122	1.91811	1.65637	1.78109	1.99888	1.48918	1.32943	1.7904	1.43202	1.44619	2.2619	1.48703	1.4362
ENSMUSG00000105019	Gm43547	predicted gene 43547 [Source:MGI Symbol;Acc:MGI:5663684]	327	blue	-0.0248896	0.742277	0.0935731	0.215416	-0.301628	4.50548e-05	0.440302	8.65042e-10	0.165391	0.027809	0.120381	0.110483	0.0945508	0.210639	0.457527	1.5314e-10	-0.469011	4.57071e-11	2.75573	0	0	2.49371	0	0	1.72153	1.35847	0	3.82908	0	1.37888	1.89535	0	0	1.83177	0	0	2.66801	0	1.44933	1.74921	0	1.36766	1.82538	2.20105	0
ENSMUSG00000029309	Sparcl1	SPARC-like 1 [Source:MGI Symbol;Acc:MGI:108110]	34622	blue	-0.0819844	0.277997	-0.107041	0.156169	-0.340752	3.4682e-06	0.0468852	0.535463	-0.276705	0.000192778	0.590655	5.00869e-18	-0.154431	0.0401361	0.603416	6.17807e-19	-0.570019	1.22311e-16	5.62389	5.01283	5.43562	5.60745	5.09084	5.14098	5.55757	5.18805	5.07863	5.62697	4.8715	5.43125	5.36481	5.07184	5.24467	5.69135	5.19075	5.30568	5.47165	5.11482	5.49416	5.45306	5.06019	5.25776	5.48008	5.1216	5.32066
ENSMUSG00000029304	Spp1	secreted phosphoprotein 1 [Source:MGI Symbol;Acc:MGI:98389]	5932	blue	-0.0517639	0.493815	0.0260439	0.730775	-0.652133	8.21909e-23	0.400901	3.21033e-08	-0.128268	0.0888606	0.466011	6.29607e-11	0.128063	0.0893752	0.899624	7.09872e-65	-0.883931	1.158e-59	2.71165	0.47211	0.937057	2.80751	1.05981	0.968287	2.71665	1.02479	0.991329	2.84615	0.580189	1.51246	2.8375	0.601764	0.765842	2.60402	0.173241	0.749286	2.69189	1.68672	2.01903	2.40499	0.42559	1.85351	3.00213	0.673592	1.14173
ENSMUSG00000049606	Zfp644	zinc finger protein 644 [Source:MGI Symbol;Acc:MGI:1277212]	80548	blue	0.0216264	0.775096	-0.0583248	0.440636	-0.658325	2.34689e-23	0.252756	0.000688415	-0.280518	0.000155686	0.565408	2.42357e-16	0.0644086	0.394373	0.866744	9.35739e-55	-0.841827	9.70562e-49	1.92274	1.64999	1.75605	2.01331	1.55579	1.5475	2.10824	1.62125	1.46837	1.90649	1.61633	1.66761	1.94864	1.43432	1.72039	1.9555	1.65185	1.78667	1.79398	1.48956	1.69351	1.98648	1.43599	1.62243	2.02775	1.39836	1.60576
ENSMUSG00000029265	Dr1	down-regulator of transcription 1 [Source:MGI Symbol;Acc:MGI:1100515]	11629	blue	-0.0359273	0.634966	-0.0417554	0.581069	-0.0980658	0.194092	0.100399	0.183645	-0.127537	0.090711	0.557715	7.40865e-16	-0.357937	1.00149e-06	0.532792	2.28663e-14	-0.522812	8.35693e-14	2.75356	2.66265	2.61637	2.77852	2.56085	2.87637	2.56333	2.70968	2.72594	2.8526	2.42683	2.62669	2.96485	2.40932	2.57457	3.00968	2.54008	2.55165	2.90218	2.41032	2.61123	2.58034	2.58214	2.54703	2.97589	2.24597	2.48945
ENSMUSG00000105112	Gm42778	predicted gene 42778 [Source:MGI Symbol;Acc:MGI:5662915]	552	blue	0.0591365	0.434291	0.0961276	0.203095	-0.333429	5.75987e-06	0.317785	1.63138e-05	0.0561922	0.457555	0.0261278	0.729941	0.140726	0.0617239	0.378943	1.98138e-07	-0.360289	8.40069e-07	2.61185	2.98802	2.56424	1.90462	2.11447	2.35378	3.19652	2.49387	2.47259	1.564	3.541	2.26089	3.17902	3.07314	2.25193	0	2.69699	2.63855	3.15889	1.31646	3.94058	2.72166	3.06602	2.24645	2.81315	1.64686	2.90353
ENSMUSG00000053334	Ficd	FIC domain containing [Source:MGI Symbol;Acc:MGI:1098550]	4797	blue	0.016187	0.83067	0.0686453	0.363949	-0.472663	3.08217e-11	0.0535438	0.47906	-0.30216	4.3614e-05	0.616408	6.64929e-20	-0.0926148	0.220174	0.594686	2.61212e-18	-0.623089	2.02898e-20	1.56616	1.08205	0.747271	0.961477	0.468037	0.558888	1.26889	1.25465	0.905123	1.59764	0.267905	0.986969	1.07898	0.713723	1.20107	1.362	0.961004	1.13945	1.58876	1.52943	0.668958	1.29217	1.18455	1.05478	0.900791	0.575848	0.697445
ENSMUSG00000025825	Iscu	iron-sulfur cluster assembly enzyme [Source:MGI Symbol;Acc:MGI:1913633]	5540	blue	-0.104934	0.164529	0.100135	0.184807	-0.433638	1.64754e-09	-0.0151692	0.841172	-0.259327	0.000491212	0.351545	1.60333e-06	0.144239	0.0554409	0.369078	4.30185e-07	-0.405311	2.19166e-08	1.23788	0	0.574991	0.864141	0.996741	0.942442	1.15101	0.87256	0.539428	1.46189	0.771264	1.1559	1.19185	0.453609	0.727859	1.3282	0.495543	0.604847	0.962242	0.672713	0.940694	1.17289	1.30428	0.457502	1.03641	0.510721	0.718888
ENSMUSG00000029545	Acads	acyl-Coenzyme A dehydrogenase, short chain [Source:MGI Symbol;Acc:MGI:87868]	9047	blue	-0.0285022	0.70648	-0.0560967	0.458321	-0.530611	3.04635e-14	0.213101	0.00440192	-0.169708	0.0239314	0.143197	0.0572469	0.345569	2.4666e-06	0.653038	6.85539e-23	-0.567877	1.68252e-16	1.46873	1.18219	1.13711	1.70501	1.21461	1.28836	1.6971	1.27105	1.25593	1.76034	0.899628	1.25612	1.7483	1.30485	1.06395	1.41433	1.00281	1.0596	1.81412	1.12584	1.08819	1.56725	1.23259	1.21034	2.19727	1.02887	1.17153
ENSMUSG00000029535	Triap1	TP53 regulated inhibitor of apoptosis 1 [Source:MGI Symbol;Acc:MGI:1916326]	2344	blue	-0.0500069	0.508613	-0.0318076	0.67428	-0.28352	0.000131284	-0.0575824	0.446485	-0.333245	5.83287e-06	0.493849	2.85249e-12	-0.0419644	0.579176	0.489526	4.69858e-12	-0.465301	6.78815e-11	3.0399	3.03293	3.18606	3.18233	3.0105	3.62961	3.17218	3.11056	3.20407	2.80537	2.68457	2.94467	2.74245	2.91631	3.23557	3.25856	3.23192	3.50334	2.80261	3.00366	2.9562	3.64751	2.63461	3.3277	2.88522	3.09244	3.27064
ENSMUSG00000041548	Hspb8	heat shock protein 8 [Source:MGI Symbol;Acc:MGI:2135756]	14373	blue	-0.104236	0.167368	-0.24547	0.000990677	-0.165436	0.0277659	0.292725	7.69119e-05	0.0709409	0.348089	-0.00337075	0.964484	0.149153	0.0475469	0.442681	6.84918e-10	-0.335366	5.04307e-06	1.39854	1.15378	0.872203	1.27664	0.655863	0.901879	0.917423	0.971449	0.662234	0.927355	0.562409	0.819462	1.03707	1.04827	1.05932	1.11419	1.00037	0.486964	1.22668	0.75441	0.837984	0.936174	0.71128	1.08046	1.38989	0.862838	0.54244
ENSMUSG00000066900	Suds3	suppressor of defective silencing 3 homolog (S. cerevisiae) [Source:MGI Symbol;Acc:MGI:1919204]	24433	blue	-0.0724242	0.338076	-0.171755	0.0222617	-0.385593	1.15782e-07	-0.0398785	0.598194	-0.319261	1.48237e-05	0.266519	0.000336097	0.13534	0.0724796	0.46531	6.78206e-11	-0.383952	1.32342e-07	1.9446	2.17281	2.05423	2.2292	1.96226	2.056	2.016	1.89583	1.7207	2.36611	1.98721	1.89556	2.09641	1.89632	2.16536	2.16811	1.99051	2.16088	2.1507	2.07009	2.09294	2.13163	1.92247	1.89868	2.40327	1.70634	1.90066
ENSMUSG00000106798	Gm43275	predicted gene 43275 [Source:MGI Symbol;Acc:MGI:5663412]	1019	blue	0.0777779	0.303482	0.161837	0.0313935	-0.239213	0.00134283	0.511504	3.451e-13	0.234117	0.00171055	0.119216	0.114	-0.00702815	0.926029	0.404272	2.39905e-08	-0.426068	3.36867e-09	0.943529	0	1.37702	0	0	0	1.68355	0.586822	0	0	0	0	1.85547	0	0	0	0	0	0.894762	0	1.41482	1.33101	0.999078	0.591865	0	0	0.664731
ENSMUSG00000107116	Gm43274	predicted gene 43274 [Source:MGI Symbol;Acc:MGI:5663411]	4999	blue	-0.0157703	0.834966	0.183097	0.0147139	-0.441259	7.87632e-10	0.481591	1.15319e-11	0.110453	0.143315	0.246869	0.000924548	0.113696	0.131862	0.576319	4.72153e-17	-0.587964	7.69687e-18	0.460882	0	0	0.381846	0.243511	0	0.679191	0	0	0.518165	0	0	0.918126	0.268701	0	0.587192	0.203392	0.157608	0.907509	0.219822	0	0.549392	0	0.141939	0.414483	0	0.1626
ENSMUSG00000106841	Gm42656	predicted gene 42656 [Source:MGI Symbol;Acc:MGI:5662793]	2304	blue	0.0146014	0.847043	0.018251	0.809467	-0.479841	1.40147e-11	0.422971	4.4907e-09	0.0647622	0.391777	0.131092	0.0819962	0.277882	0.000180524	0.511696	3.37021e-13	-0.50433	8.26075e-13	0	0.413862	0.305075	1.57159	0	0	0.407222	0	0	0	0	0.295343	0.825476	0	0	0	0	0.808498	0.464718	0	0	1.00403	0	0	1.05879	0	0
ENSMUSG00000029616	Erp29	endoplasmic reticulum protein 29 [Source:MGI Symbol;Acc:MGI:1914647]	23916	blue	-0.0328252	0.664482	-0.142871	0.0578208	-0.713703	7.32408e-29	0.202198	0.00695589	-0.255361	0.000602838	0.0695501	0.357645	0.622562	2.23064e-20	0.699401	2.55481e-27	-0.582987	1.68587e-17	2.48603	2.10326	2.17514	2.25353	2.1061	1.94373	2.37257	2.10214	2.12461	2.6517	2.09571	1.90138	2.59886	2.23967	2.1405	2.65187	1.78106	2.0058	2.57112	1.93397	2.05222	2.14501	2.03786	2.25102	2.8252	2.25947	1.89458
ENSMUSG00000105742	Gm42748	predicted gene 42748 [Source:MGI Symbol;Acc:MGI:5662885]	2340	blue	-0.0530836	0.482853	0.0321529	0.670949	-0.632024	3.96493e-21	0.461327	1.03152e-10	-0.0280767	0.710665	0.255869	0.000587337	0.268486	0.000302403	0.72655	2.49079e-30	-0.712707	9.44708e-29	0.85126	0	0.549639	1.19827	0	0	1.38159	0.523215	0	0.94349	0	0.533427	1.3337	0	0.529933	0.778555	0	0	1.32008	0.434686	0.569236	1.57543	0.520964	0	1.27621	0	0.327536
ENSMUSG00000038582	Pptc7	PTC7 protein phosphatase homolog [Source:MGI Symbol;Acc:MGI:2444593]	39916	blue	-0.0873807	0.247476	-0.0147014	0.846008	-0.553267	1.39543e-15	0.113465	0.132653	-0.364805	5.97087e-07	0.776448	6.23151e-37	-0.155825	0.0383498	0.848987	2.34646e-50	-0.848449	3.12411e-50	1.92777	1.37393	1.648	2.11119	1.45948	1.71123	1.89171	1.73643	1.30352	1.82522	1.15456	1.61293	2.14786	1.25369	1.76846	2.12273	1.54354	1.533	2.13036	1.35985	1.55009	1.88337	1.1364	1.64911	2.25466	1.04346	1.43472
ENSMUSG00000029467	Atp2a2	ATPase, Ca++ transporting, cardiac muscle, slow twitch 2 [Source:MGI Symbol;Acc:MGI:88110]	48712	blue	0.0602726	0.425499	-0.0963911	0.201854	-0.751791	1.79067e-33	0.121246	0.107927	-0.343808	2.79578e-06	0.160473	0.0328689	0.509316	4.51326e-13	0.681143	1.77333e-25	-0.580437	2.50665e-17	3.61809	3.53503	3.18897	3.54422	3.427	3.35408	3.49878	3.21154	3.49331	3.41217	3.60797	3.20477	3.45068	3.37144	3.21137	3.68249	3.56053	3.4054	3.71519	3.64805	3.28868	3.65959	3.36708	3.31231	3.75498	3.45305	3.23624
ENSMUSG00000105434	Gm43359	predicted gene 43359 [Source:MGI Symbol;Acc:MGI:5663496]	2199	blue	0.068333	0.36614	0.129104	0.0867817	-0.317442	1.66796e-05	0.682167	1.40947e-25	0.340056	3.64158e-06	0.206346	0.00585976	-0.040355	0.593825	0.554438	1.18221e-15	-0.58657	9.60041e-18	1.99809	0.43094	0.578652	1.44471	0.876555	0.331165	1.4375	0.763647	0.465454	1.5679	0.531212	0.56174	1.77693	0	0.305867	1.33489	0	0.837754	1.3745	0.805974	0.330418	1.26592	0.548733	0.304546	1.86715	0	0.625197
ENSMUSG00000105613	Gm43684	predicted gene 43684 [Source:MGI Symbol;Acc:MGI:5663821]	6572	blue	-0.00683289	0.928079	0.122303	0.104867	-0.55301	1.44701e-15	0.302115	4.37328e-05	-0.0914792	0.225907	0.221633	0.00302974	0.261496	0.000438597	0.619383	3.93347e-20	-0.638501	1.17384e-21	0.515454	0	0	0.428384	0	0.119471	0.425461	0	0	0.728925	0.20031	0	0.745642	0.208795	0	0.327373	0	0.233414	0.736546	0.170175	0.119182	0.435669	0	0.109215	0.81515	0	0
ENSMUSG00000029474	Rnf34	ring finger protein 34 [Source:MGI Symbol;Acc:MGI:2153340]	21243	blue	-0.103235	0.171506	-0.0464801	0.538998	-0.556385	8.96127e-16	0.0811497	0.282935	-0.398741	3.86245e-08	0.660226	1.58759e-23	0.0111996	0.882383	0.828706	5.62877e-46	-0.798343	2.14409e-40	2.47546	1.95711	1.98647	2.3302	1.77529	1.97751	2.31082	2.18248	1.89514	2.03618	1.8948	1.98431	2.59087	1.92381	2.04585	2.30459	2.15574	2.08155	2.44671	1.83038	1.75327	2.26822	1.52024	2.02344	2.38663	1.63446	2.07057
ENSMUSG00000105107	Gm43412	predicted gene 43412 [Source:MGI Symbol;Acc:MGI:5663549]	2817	blue	-0.065844	0.383899	0.0621593	0.411128	-0.327692	8.49468e-06	0.3516	1.59699e-06	0.0499227	0.509328	0.154707	0.0397776	0.111112	0.140931	0.508231	5.15192e-13	-0.525965	5.57422e-14	1.00136	0	0	0.343529	0.407399	0	0.341119	0	0	0.821183	0.43027	0	0.395891	0.447101	0.244098	0.37533	0	0	0.950478	0	0	0.86589	0	0.243021	0.915274	0	0.277047
ENSMUSG00000065191	Gm23458	predicted gene, 23458 [Source:MGI Symbol;Acc:MGI:5453235]	168	blue	-0.00696083	0.926736	0.0324321	0.66826	-0.456474	1.70715e-10	0.325856	9.60277e-06	-0.0507691	0.502166	0.255553	0.00059693	0.139855	0.0633671	0.597886	1.54779e-18	-0.595346	2.34599e-18	3.60877	0	2.08048	2.46157	0	0	3.31401	2.01595	2.58105	4.34254	0	0	3.53469	0	2.03252	3.45479	0	0	3.51402	2.56011	2.12727	2.48465	3.7132	3.35461	3.98687	0	2.18585
ENSMUSG00000104830	5830487J09Rik	RIKEN cDNA 5830487J09 gene [Source:MGI Symbol;Acc:MGI:1923368]	2447	blue	-0.0108606	0.885918	0.0356911	0.637194	-0.52199	9.28027e-14	0.391778	6.94957e-08	-0.0290507	0.701099	0.325551	9.80002e-06	0.137753	0.0674866	0.688655	3.21797e-26	-0.719741	1.53044e-29	1.5471	0	0.288915	0.9475	0	0	0.942017	0.273838	0	2.03204	0	0.27965	1.49441	0	0	1.76318	0	0.305475	1.94961	0	0	1.81757	0	0.508347	1.23869	0	0
ENSMUSG00000106636	Gm43813	predicted gene 43813 [Source:MGI Symbol;Acc:MGI:5663950]	5377	blue	-0.0339108	0.654091	0.0920951	0.222785	-0.47045	3.9157e-11	0.477021	1.91423e-11	0.0897405	0.234889	0.234222	0.00170219	0.124348	0.0991424	0.598866	1.31702e-18	-0.637925	1.30967e-21	1.36438	0	0.138687	0.6447	0.227672	0	0.355566	0.251257	0	1.3824	0	0.134015	0.732654	0.251363	0	0.39104	0.189993	0	0.406748	0.205416	0.144383	0.193619	0	0.132404	1.16201	0	0.289045
ENSMUSG00000104704	Gm43133	predicted gene 43133 [Source:MGI Symbol;Acc:MGI:5663270]	462	blue	-0.0402419	0.594861	0.0703698	0.351993	-0.419943	5.93201e-09	0.368054	4.65524e-07	0.0280026	0.711394	0.183296	0.0146047	0.158411	0.0352123	0.531343	2.76734e-14	-0.516517	1.85222e-13	2.34272	0	2.1773	2.91787	0	2.22788	2.90798	1.68444	2.20931	1.73894	2.38889	1.70747	1.54858	1.6849	0	0	0	0	2.74112	3.02213	1.15384	2.11878	2.43446	1.69482	2.67849	0	2.28472
ENSMUSG00000029422	Rsrc2	arginine/serine-rich coiled-coil 2 [Source:MGI Symbol;Acc:MGI:1913489]	20988	blue	0.00793008	0.916569	-0.0747277	0.322895	-0.153935	0.0407883	0.442563	6.92946e-10	0.253256	0.000671174	-0.227264	0.00234982	0.357387	1.04335e-06	0.284847	0.000121684	-0.179282	0.0169558	3.10771	2.94009	2.97277	3.22278	3.12956	3.06703	3.41015	3.0294	3.16006	3.10712	3.1433	3.01036	3.15788	2.96839	3.0912	2.93738	3.09979	3.06973	3.30545	3.00311	2.98248	3.48923	3.10649	2.87354	3.08598	2.92886	3.06835
ENSMUSG00000105382	Gm43339	predicted gene 43339 [Source:MGI Symbol;Acc:MGI:5663476]	1605	blue	0.0212676	0.77873	0.21278	0.00446302	-0.239568	0.00132013	0.498237	1.70661e-12	0.267993	0.000310539	0.0625051	0.408525	0.0721366	0.340003	0.34566	2.4506e-06	-0.363475	6.60633e-07	0.665528	0	0	1.27241	1.10123	0	1.26573	0.399087	0.605651	0	0	0	1.68562	0.711617	0.404427	1.03071	0	0.78164	1.39873	0.597067	0	0	0	0.402736	0.602465	0	0
ENSMUSG00000037979	Ccdc92	coiled-coil domain containing 92 [Source:MGI Symbol;Acc:MGI:106485]	28006	blue	0.0014141	0.985096	0.00267824	0.971777	-0.703034	1.05748e-27	0.00867839	0.908728	-0.496286	2.14643e-12	0.732284	5.17304e-31	0.0501977	0.506995	0.833797	5.09054e-47	-0.832469	9.6005e-47	1.70073	1.19198	1.1634	1.58553	0.964798	1.16084	1.70209	1.25579	1.28393	1.53097	1.05902	1.2068	1.61562	0.936261	1.29064	1.76171	1.03841	1.28827	1.7687	1.12112	1.30758	1.60437	1.13696	1.18482	1.79303	0.812472	1.21431
ENSMUSG00000104581	Gm42497	predicted gene 42497 [Source:MGI Symbol;Acc:MGI:5662634]	1957	blue	0.00391946	0.958707	0.132411	0.0789385	-0.348449	2.00638e-06	0.43688	1.20636e-09	0.17285	0.0214102	0.109054	0.148484	0.101122	0.18049	0.42942	2.45943e-09	-0.48325	9.57711e-12	1.76706	0.476287	0	0.827014	0	0	0.468798	0	0	2.1082	0.585144	0	1.71042	0	0	0.891749	0.471702	0	1.22793	0	0	1.36655	0	0	1.43313	0.679174	0.383772
ENSMUSG00000105772	Gm42496	predicted gene 42496 [Source:MGI Symbol;Acc:MGI:5662633]	3240	blue	0.00823529	0.91337	0.0682882	0.366456	-0.464267	7.57277e-11	0.40688	1.91075e-08	0.0445068	0.556384	0.204812	0.00624587	0.165275	0.0279208	0.582735	1.75378e-17	-0.60571	4.19886e-19	1.11199	0	0	0.303057	0	0	0.300902	0	0	1.41513	0	0	1.40446	0	0	1.02387	0	0.23647	0.62341	0	0	0	0	0	1.34513	0	0
ENSMUSG00000104727	Gm42500	predicted gene 42500 [Source:MGI Symbol;Acc:MGI:5662637]	878	blue	0.00103811	0.989059	0.00301944	0.968184	-0.239214	0.00134279	0.297217	5.88532e-05	0.0612539	0.417988	0.0920227	0.22315	0.0598374	0.428854	0.349063	1.91958e-06	-0.311568	2.42861e-05	1.65213	0	1.16084	0.897323	2.04986	0	2.40028	0	1.53964	0	1.08058	1.47946	1.0094	1.11478	0.670368	0.965943	0	0.728791	2.31881	0	0	1.46426	1.11044	0	0.961607	1.22656	0.747828
ENSMUSG00000104814	Gm42979	predicted gene 42979 [Source:MGI Symbol;Acc:MGI:5663116]	2227	blue	-0.145848	0.0527452	0.0255386	0.735802	-0.246522	0.000940563	0.527987	4.29021e-14	0.276678	0.000193068	-0.0343724	0.649693	0.160063	0.0333247	0.370137	3.96293e-07	-0.360755	8.11219e-07	1.42747	0.754862	0.791501	0.748607	0.868272	1.01374	1.42601	0	0	1.29574	0.525614	0.95615	1.58354	0.940424	0.302398	0.46033	0.422077	0.602404	1.36331	1.84246	0.817561	1.25529	0.936563	0.947328	1.51991	0.611957	1.22589
ENSMUSG00000029432	Nipsnap2	nipsnap homolog 2 [Source:MGI Symbol;Acc:MGI:1278343]	33264	blue	-0.0287852	0.703702	0.00860515	0.909495	-0.615609	7.64995e-20	-0.0194162	0.797558	-0.46595	6.33669e-11	0.793863	1.18523e-39	-0.0603337	0.425029	0.772483	2.3985e-36	-0.793568	1.3248e-39	1.49059	1.19454	1.05415	1.65087	1.01607	1.25197	1.66382	1.28094	1.12632	2.0754	0.843611	1.30063	1.75697	0.966249	1.46684	1.77217	1.37446	0.901033	1.65926	1.06236	1.1973	1.67012	0.844353	1.12488	1.62092	1.09213	1.04111
ENSMUSG00000086916	Gm15903	predicted gene 15903 [Source:MGI Symbol;Acc:MGI:3802037]	4643	blue	-0.0330285	0.662531	-0.00837119	0.911946	-0.571825	9.32947e-17	0.322595	1.19176e-05	-0.10129	0.179766	0.246971	0.000919906	0.22416	0.00270519	0.672943	1.07916e-24	-0.680857	1.89054e-25	0.685144	0.220171	0	0.218001	0.26059	0	0.404545	0.287259	0	0.76375	0	0	0.655099	0.287378	0	0.783342	0	0	0.810949	0.235371	0.165942	0.414319	0.524444	0.152266	0.441844	0	0.174342
ENSMUSG00000029446	Psph	phosphoserine phosphatase [Source:MGI Symbol;Acc:MGI:97788]	21891	blue	-0.0459031	0.544054	-0.067868	0.369419	-0.272091	0.000248645	0.0250991	0.740185	-0.21994	0.00326649	0.438301	1.05123e-09	-0.0497109	0.511129	0.441485	7.70357e-10	-0.451558	2.82105e-10	1.42009	1.08338	1.16299	0.977261	0.704717	0.970135	0.866942	1.10088	0.850555	0.799177	1.1423	0.932501	1.01136	0.986779	1.12839	1.05006	0.898672	1.00123	1.16349	1.03731	0.890008	1.01656	1.04911	0.905769	1.07179	0.976334	0.986065
ENSMUSG00000107118	Gm42986	predicted gene 42986 [Source:MGI Symbol;Acc:MGI:5663123]	3384	blue	0.0301896	0.689973	0.139709	0.0636461	-0.188989	0.0117599	0.34854	1.99338e-06	0.125374	0.0963645	0.234819	0.00165496	-0.0934586	0.215981	0.382085	1.53943e-07	-0.405097	2.23293e-08	0.353893	0.538461	0	0.53368	0	0.587863	0.916998	0.539463	0.318948	0	0.366547	0.388847	0.838788	0.381201	0.386178	0	0	0.227159	0	0.980067	0.416299	0.542444	0.679403	0.205052	0.797002	0.430492	0.612321
ENSMUSG00000106751	Gm42467	predicted gene 42467 [Source:MGI Symbol;Acc:MGI:5662604]	1446	blue	-0.0716956	0.342972	0.103072	0.17219	-0.427494	2.94778e-09	0.49006	4.4192e-12	0.134411	0.07448	0.180012	0.0165047	0.149168	0.0475245	0.577697	3.82389e-17	-0.60241	7.31149e-19	1.5616	0.612956	0	1.3625	0	0.47757	1.84728	0.436923	0	1.31842	1.23505	0.785717	1.79099	0	0	1.45237	0.607309	0.484475	1.77493	1.09627	0.834155	1.87596	0	0	1.10474	0	0.867806
ENSMUSG00000106710	Gm43166	predicted gene 43166 [Source:MGI Symbol;Acc:MGI:5663303]	4690	blue	-0.104361	0.166857	0.0341731	0.65159	-0.486264	6.81504e-12	0.336072	4.80335e-06	-0.051833	0.493238	0.251185	0.000745301	0.185162	0.0136123	0.660181	1.60255e-23	-0.662605	9.6963e-24	0.849888	0	0	0.403782	0.258199	0.164763	0.848853	0	0	1.50712	0.503275	0	0.962197	0.284764	0	0.618629	0	0.453254	1.61057	0	0.16437	0.991324	0.723322	0.150817	1.80043	0	0
ENSMUSG00000106557	Gm42442	predicted gene 42442 [Source:MGI Symbol;Acc:MGI:5662579]	1132	blue	0.0441572	0.559493	0.16916	0.0243966	-0.236597	0.00152145	0.475721	2.20814e-11	0.179983	0.0165229	0.245676	0.000980673	-0.111204	0.140598	0.491591	3.70514e-12	-0.516799	1.78798e-13	0	0	0.564901	1.22534	0	0	2.11067	0.537872	0	0	0	0	1.74729	0	0.544745	0	0	0	0	0	0	2.14117	0	0	1.97802	0	1.03822
ENSMUSG00000106802	Gm42885	predicted gene 42885 [Source:MGI Symbol;Acc:MGI:5663022]	4213	blue	-0.0778439	0.30307	0.0582938	0.440879	-0.452997	2.43738e-10	0.338976	3.92684e-06	-0.0244575	0.746597	0.238545	0.00138656	0.159606	0.0338378	0.600357	1.02899e-18	-0.620251	3.37123e-20	0.739765	0	0	0.781635	0	0	0.440109	0	0	0.597177	0.301406	0	1.03959	0	0	0.261445	0	0	0.872915	0	0.343328	1.0703	0	0	1.12746	0	0
ENSMUSG00000004951	Hspb1	heat shock protein 1 [Source:MGI Symbol;Acc:MGI:96240]	1644	blue	-0.00387994	0.959123	-0.022525	0.766016	-0.332611	6.09104e-06	0.0554522	0.463509	-0.219447	0.0033384	0.420859	5.45459e-09	-0.0824577	0.275222	0.480659	1.27964e-11	-0.48119	1.20602e-11	1.94906	1.92364	1.40605	2.60111	1.6944	2.03782	1.90394	1.80278	1.01334	2.0993	0.673935	2.06481	2.0862	1.51981	1.81848	2.01965	2.22744	1.63509	2.77796	1.00069	2.03506	1.5256	1.79749	2.43329	1.81969	1.65401	1.49254
ENSMUSG00000051502	Ufsp1	UFM1-specific peptidase 1 [Source:MGI Symbol;Acc:MGI:1917490]	1036	blue	0.0145957	0.847101	0.0414846	0.583525	-0.252917	0.000682815	0.183487	0.0145003	-0.0424429	0.574853	0.22952	0.00211873	-0.0282691	0.708772	0.388414	9.18544e-08	-0.373711	2.99856e-07	2.87903	2.93547	2.51432	3.05494	2.44258	2.09968	3.0449	2.56973	1.77591	2.85907	1.53092	2.01127	2.40405	2.30783	1.80998	2.73457	1.67431	1.07999	2.1312	0	2.69222	2.94656	1.98076	1.99755	2.54049	2.13984	2.62784
ENSMUSG00000037221	Mospd3	motile sperm domain containing 3 [Source:MGI Symbol;Acc:MGI:1916179]	4413	blue	-0.0107638	0.886928	0.0837593	0.26769	-0.342618	3.04135e-06	0.237839	0.00143414	-0.0557769	0.460892	0.281294	0.000148998	0.0507107	0.502658	0.513629	2.65418e-13	-0.496243	2.15737e-12	1.31746	0.429673	0.797149	1.34744	0.700314	0.926023	0.888578	1.03077	0.250633	0.79433	0.916292	0.67178	1.00561	0.300894	1.04202	0.463987	0.893388	0.477464	0.842924	0.457217	0.714801	1.15382	0.299378	1.11846	1.32657	0.340983	0.491015
ENSMUSG00000029723	Spacdr	sperm acrosome developmental regulator [Source:MGI Symbol;Acc:MGI:1926079]	22720	blue	-0.0502108	0.506884	0.0831873	0.270983	-0.616854	6.14857e-20	0.137512	0.0679704	-0.295296	6.60239e-05	0.716245	3.80762e-29	-0.0152	0.840854	0.764839	2.98984e-35	-0.815556	1.96604e-43	2.3503	0.418921	0.539748	1.22243	0.404522	0.699859	1.69996	0.874161	0.734076	2.264	0.427254	0.718135	1.88804	0.744735	0.543146	2.12186	0.414811	0.616714	2.04325	0.591676	0.67614	1.68233	0.577947	0.75055	1.21296	0.500081	0.794928
ENSMUSG00000056966	Gjc3	gap junction protein, gamma 3 [Source:MGI Symbol;Acc:MGI:2153041]	9637	blue	0.037825	0.617186	0.0532225	0.481706	-0.464887	7.09251e-11	0.531662	2.65357e-14	0.084485	0.263551	0.388894	8.82857e-08	0.00268628	0.971693	0.744204	1.72443e-32	-0.749373	3.7179e-33	2.35051	1.02335	1.30087	1.87659	1.28136	1.46798	2.46527	1.37418	1.5417	2.16172	1.27622	1.48147	1.68489	1.18545	1.26369	2.04503	0.957871	1.17472	1.29501	1.07718	1.91084	1.95791	0.798442	1.70153	1.80873	1.06958	1.27702
ENSMUSG00000029730	Mcm7	minichromosome maintenance complex component 7 [Source:MGI Symbol;Acc:MGI:1298398]	7839	blue	0.0251136	0.740041	-0.0850276	0.260486	-0.613715	1.06445e-19	0.204496	0.00632814	-0.249649	0.000805071	0.286569	0.000110198	0.25712	0.000550722	0.677577	3.91746e-25	-0.634786	2.36795e-21	1.76563	0.982966	1.07546	1.23427	1.26728	1.10977	1.76399	1.28418	1.19011	1.16355	1.64285	0.952176	1.49339	0.936497	0.843966	1.99631	1.23371	0.968637	1.64262	1.03534	1.05866	1.36531	1.20054	1.47515	1.64267	0.926431	1.29014
ENSMUSG00000036968	Cnpy4	canopy FGF signaling regulator 4 [Source:MGI Symbol;Acc:MGI:1913705]	6433	blue	-0.00138886	0.985362	-0.0746302	0.323528	-0.408611	1.64102e-08	0.315434	1.8982e-05	-0.0137765	0.855588	0.175093	0.0197536	0.124493	0.0987469	0.607598	3.04845e-19	-0.565582	2.36226e-16	2.26372	1.41464	1.28319	1.79592	1.28026	1.5121	1.97089	1.97884	1.49679	2.17822	1.33436	1.43757	2.06356	2.00815	1.59368	2.66328	1.6405	1.43529	2.18237	0.821631	1.63762	1.81602	1.75403	1.80346	2.39709	1.50029	1.31228
ENSMUSG00000029551	Psmg3	proteasome (prosome, macropain) assembly chaperone 3 [Source:MGI Symbol;Acc:MGI:1913756]	3293	blue	-0.0886811	0.240483	0.0388145	0.608002	-0.535915	1.51092e-14	0.107763	0.153379	-0.350469	1.73376e-06	0.694249	8.72802e-27	-0.0408117	0.589651	0.786451	1.83191e-38	-0.792454	2.01206e-39	2.74712	1.8307	2.40156	2.65303	1.26041	1.97424	2.92927	2.28777	1.71735	2.56561	1.31399	1.82504	2.85052	1.35271	2.43715	2.664	1.72176	2.11422	2.88396	1.32144	1.83918	2.56682	1.16105	1.52776	2.71319	1.80781	2.41863
ENSMUSG00000029570	Lfng	LFNG O-fucosylpeptide 3-beta-N-acetylglucosaminyltransferase [Source:MGI Symbol;Acc:MGI:1095413]	8225	blue	-0.00193075	0.979652	-0.177292	0.0182385	-0.414847	9.41858e-09	0.316292	1.7964e-05	0.0696845	0.356714	-0.346901	2.24259e-06	0.618442	4.64671e-20	0.34476	2.61291e-06	-0.227438	0.00233129	2.11003	1.31563	1.17205	2.2556	1.69379	1.29201	1.35222	1.04064	1.55293	1.36505	1.75712	0.966841	1.75666	1.69585	1.13727	1.55266	1.30586	1.17816	1.37679	1.20192	1.36886	1.93239	1.51399	1.04839	1.49597	1.71757	1.41561
ENSMUSG00000106543	Gm43378	predicted gene 43378 [Source:MGI Symbol;Acc:MGI:5663515]	581	blue	-0.117769	0.118488	0.0391069	0.6053	-0.552284	1.60291e-15	0.381572	1.60446e-07	-0.0510139	0.500104	0.27367	0.000228014	0.213446	0.00433709	0.722182	8.03296e-30	-0.718554	2.08904e-29	3.62463	0	0	1.20387	0	0.983022	2.90042	0.910985	0	3.36391	1.42481	0	3.72766	0	0	2.7576	0	0	2.46501	0	0	1.21986	0	0	3.26167	0	0
ENSMUSG00000089889	0610040B10Rik	RIKEN cDNA 0610040B10 gene [Source:MGI Symbol;Acc:MGI:1914922]	3457	blue	-0.0427241	0.57232	-0.0101706	0.893122	-0.546049	3.82195e-15	0.232478	0.0018471	-0.13483	0.0735715	0.249137	0.000825929	0.276362	0.000196489	0.591989	4.04224e-18	-0.601685	8.25197e-19	1.89582	0.915128	0.835694	1.46083	1.9726	1.2098	0.902596	0.529928	0.569873	1.67224	1.09263	0.932397	2.20232	0.670913	0.536717	1.29441	0.90746	1.11669	1.47147	1.13095	0.72672	0.74002	1.12271	0.805303	1.66254	0.749063	1.0251
ENSMUSG00000105594	Gm43398	predicted gene 43398 [Source:MGI Symbol;Acc:MGI:5663535]	2741	blue	0.0344284	0.64916	0.0102762	0.892018	-0.811373	1.14926e-42	0.331406	6.61134e-06	-0.270486	0.000271379	0.549028	2.52902e-15	0.216231	0.00384439	0.970811	1.90862e-110	-0.951346	2.12862e-91	4.54284	0.355329	0.481174	4.89416	0	1.51756	4.75717	0.641361	0.384561	4.22748	0	0.466669	4.48656	0	1.218	4.46407	0.35177	0.27564	4.42258	0	2.03466	4.60797	0.80122	0.461644	4.39443	0.894149	0
ENSMUSG00000051306	Usp42	ubiquitin specific peptidase 42 [Source:MGI Symbol;Acc:MGI:1924050]	21955	blue	0.00386329	0.959299	0.0711686	0.34654	-0.440617	8.3878e-10	0.217653	0.00361264	-0.153443	0.0414452	0.604333	5.29607e-19	-0.175661	0.0193523	0.63536	2.12577e-21	-0.678698	3.05707e-25	1.46302	1.03281	1.12841	1.42778	1.14673	1.0057	1.47492	1.20451	1.12579	1.36418	1.13999	1.22346	1.1994	0.803908	1.01229	1.52011	1.16416	1.091	1.46197	0.92556	1.27371	1.30883	0.946414	1.22762	1.2642	1.12367	1.06114
ENSMUSG00000029617	Ccz1	CCZ1 vacuolar protein trafficking and biogenesis associated [Source:MGI Symbol;Acc:MGI:2141070]	26968	blue	-0.0247633	0.743539	-0.168914	0.0246076	-0.566157	2.17025e-16	-0.174857	0.0199225	-0.424234	3.99509e-09	0.0161193	0.831367	0.654145	5.48735e-23	0.318721	1.53534e-05	-0.233774	0.00173836	1.10514	1.16926	1.19382	1.23145	1.0873	1.24342	1.35632	1.19514	1.20412	0.971767	1.43615	1.15235	1.60641	1.24255	0.987029	1.38625	1.17819	1.03457	1.59124	1.31902	1.13504	1.39634	1.51052	1.22745	1.27439	1.43378	1.02814
ENSMUSG00000066621	Tecpr1	tectonin beta-propeller repeat containing 1 [Source:MGI Symbol;Acc:MGI:1917631]	29173	blue	-0.0251989	0.739189	-0.0616986	0.41461	-0.602027	7.7948e-19	0.375564	2.59145e-07	-0.101119	0.180505	0.214279	0.00418408	0.307079	3.21928e-05	0.71949	1.63489e-29	-0.651626	9.09446e-23	1.81366	1.27319	1.41889	1.58449	1.38232	1.45968	1.64976	1.37598	1.60299	1.53019	1.52558	1.39654	1.74318	1.47981	1.25611	1.58902	1.49368	1.18013	1.68756	1.35117	1.32955	1.57796	1.28112	1.20851	1.68895	1.22091	1.3293
ENSMUSG00000104682	Gm42636	predicted gene 42636 [Source:MGI Symbol;Acc:MGI:5662773]	2238	blue	-0.0351699	0.642122	0.00706966	0.925593	-0.276726	0.000192547	0.258936	0.000501312	0.00583956	0.938512	0.117104	0.120598	0.10959	0.14649	0.418495	6.7703e-09	-0.425811	3.45033e-09	0	0.75197	1.29547	0.745733	1.15842	1.18121	0.417647	0.753278	0.805897	2.1304	0	0.95271	0.843895	0.937024	0.762253	1.08544	0.420278	0.330958	1.35897	0.451691	0.325262	1.77213	0	0.759413	1.84878	1.36581	0.34083
ENSMUSG00000029642	Polr1d	polymerase (RNA) I polypeptide D [Source:MGI Symbol;Acc:MGI:108403]	34547	blue	-0.0567595	0.453019	0.0177813	0.814281	-0.702684	1.15184e-27	-0.133419	0.0766663	-0.570186	1.19292e-16	0.700084	2.16646e-27	0.193775	0.00975826	0.68468	7.99144e-26	-0.694211	8.8062e-27	1.41204	0.898532	0.910323	1.08275	0.615534	0.864896	1.14926	0.882752	0.747259	1.17031	0.748483	0.921359	1.34756	0.616571	0.892848	1.4178	1.14074	1.02548	1.43199	0.911657	0.939175	1.2273	0.641277	1.09557	1.02533	0.861864	0.924243
ENSMUSG00000001687	Ubl3	ubiquitin-like 3 [Source:MGI Symbol;Acc:MGI:1344373]	48154	blue	-0.0283478	0.707998	0.0393364	0.603182	-0.644502	3.70198e-22	0.076898	0.309001	-0.409971	1.45533e-08	0.874824	5.68006e-57	-0.130084	0.0843958	0.841176	1.34865e-48	-0.884515	7.64714e-60	2.79476	2.02435	1.72672	2.64821	1.63212	2.05175	2.68487	1.95152	1.70503	2.93769	1.49015	2.16644	2.82693	1.51045	2.06772	2.91043	2.05085	2.07848	2.85178	1.9138	1.83754	2.72886	1.60882	1.9101	2.52808	1.58668	1.92563
ENSMUSG00000107096	Gm43597	predicted gene 43597 [Source:MGI Symbol;Acc:MGI:5663734]	7071	blue	0.0406164	0.591434	0.111881	0.138181	-0.505367	7.29109e-13	0.0425698	0.57371	-0.261532	0.000437752	0.419368	6.2522e-09	0.134157	0.0750344	0.499966	1.39107e-12	-0.506515	6.34618e-13	0.949589	0.624142	0.468475	0.973782	1.02852	1.1399	1.31482	1.10925	0.961456	0.938486	0.635742	0.799276	1.00457	0.785481	0.911747	0.774209	0.618412	0.651932	1.38396	0.763974	1.08446	1.45813	0.655995	1.0679	1.40439	0.998832	0.669394
ENSMUSG00000033970	Rfc3	replication factor C (activator 1) 3 [Source:MGI Symbol;Acc:MGI:1916513]	8486	blue	-0.0369373	0.625477	-0.0108718	0.885801	-0.439284	9.55315e-10	0.145324	0.0536111	-0.151148	0.0446227	0.215793	0.00391831	0.195473	0.00912386	0.487708	5.7832e-12	-0.48925	4.84915e-12	1.22054	0.706155	0.768319	0.920287	0.624408	0.953147	0.914917	0.507826	1.06027	1.01311	0.656958	1.03461	0.703903	0.882994	0.984884	0.757414	0.919829	0.805724	1.22738	0.747348	0.616884	1.24191	1.05613	1.02529	0.912476	0.3531	0.98835
ENSMUSG00000032766	Gng11	guanine nucleotide binding protein (G protein), gamma 11 [Source:MGI Symbol;Acc:MGI:1913316]	4541	blue	-0.0628993	0.405569	-0.0176623	0.815502	-0.571118	1.03745e-16	0.30636	3.36649e-05	-0.153836	0.0409205	0.385389	1.17727e-07	0.213719	0.0042864	0.75452	7.77216e-34	-0.725977	2.90854e-30	3.30865	1.95076	2.56038	2.84218	2.59941	2.3571	2.83237	2.13061	2.0477	1.94647	2.28692	2.26415	2.73995	1.59853	2.3227	2.66573	1.663	1.66008	2.88035	2.60249	3.06239	2.39281	1.36109	2.55925	2.33064	1.49248	2.67463
ENSMUSG00000107932	Gm44432	predicted gene, 44432 [Source:MGI Symbol;Acc:MGI:5690824]	937	blue	0.0533649	0.480533	0.179406	0.0168782	-0.22488	0.00261866	0.481953	1.10745e-11	0.205282	0.00612508	0.388924	8.80646e-08	-0.248649	0.000846298	0.506932	6.03371e-13	-0.574693	6.04821e-17	3.00507	0.861532	0	2.9004	0	0.683072	2.3247	1.06469	0	1.72486	0	0.640258	1.53534	2.09648	1.0762	1.47852	0	0	2.50399	0.909277	1.14278	2.35645	0	0	1.47282	0	1.18459
ENSMUSG00000092035	Peg10	paternally expressed 10 [Source:MGI Symbol;Acc:MGI:2157785]	13211	blue	0.0216465	0.774892	0.0326205	0.666448	-0.248479	0.000853508	0.37633	2.43901e-07	0.0866268	0.251595	0.303696	3.96915e-05	-0.175775	0.0192726	0.511259	3.55648e-13	-0.528922	3.79881e-14	0.891055	0.711393	0.865019	0.755267	0.18796	0.9912	0.541035	0.918735	0.529709	1.20673	0.454676	0.481502	0.799599	0.625051	0.557498	0.86684	0.486488	0.608022	0.483036	0.522017	0.715995	0.664104	0.299951	0.735574	0.911935	0.439619	0.89354
ENSMUSG00000012483	Rpa3	replication protein A3 [Source:MGI Symbol;Acc:MGI:1915490]	3237	blue	-0.0198759	0.792871	0.0388902	0.607302	-0.423343	4.339e-09	0.0317374	0.674959	-0.226409	0.00244329	0.368971	4.33753e-07	0.0788472	0.296862	0.411792	1.23803e-08	-0.442413	7.03221e-10	0.368075	0.558726	0.878174	1.1176	0	0.433574	1.25868	0.396176	0.60152	1.73801	0	0.719657	1.6773	0.706924	0.214662	1.35134	1.11708	0.236672	1.53284	0.817658	0.432628	1.28185	0.703801	1.08246	1.02004	0.788238	0.796572
ENSMUSG00000052419	Smim30	small integral membrane protein 30 [Source:MGI Symbol;Acc:MGI:1913770]	3783	blue	-0.0625403	0.40826	-0.0929356	0.218573	-0.66326	8.45903e-24	-0.0651613	0.388859	-0.477195	1.87795e-11	0.599275	1.23101e-18	0.195123	0.00925152	0.660091	1.63238e-23	-0.658819	2.12058e-23	3.41936	2.33544	2.36713	3.17123	2.28912	1.88744	2.79883	3.00549	2.18307	3.69952	2.0374	2.28513	3.20624	1.78021	2.27613	3.36359	2.37891	2.4793	3.45325	2.29717	2.10145	3.02595	2.67364	2.49699	2.74791	2.78856	2.43675
ENSMUSG00000106944	Gm43843	predicted gene 43843 [Source:MGI Symbol;Acc:MGI:5663980]	1586	blue	-0.0188491	0.803348	0.140833	0.0615225	-0.0238478	0.752708	0.412582	1.15378e-08	0.255428	0.000600754	0.313689	2.12247e-05	-0.337679	4.29773e-06	0.303799	3.94413e-05	-0.387756	9.69643e-08	2.36519	0.568187	0.752043	2.26911	0	1.05191	1.75226	0.976344	0	1.24005	0	0.731222	1.69748	0	0.408646	1.6374	0	0.788852	2.43744	0	1.05003	1.29915	1.19115	0.40694	0.608353	0.80063	1.08957
ENSMUSG00000106855	5330437M03Rik	RIKEN cDNA 5330437M03 gene [Source:MGI Symbol;Acc:MGI:2444650]	4082	blue	0.0769775	0.3085	0.0841655	0.265368	-0.472645	3.08832e-11	0.629186	6.69851e-21	0.199662	0.00771279	0.19326	0.00995805	0.130847	0.0825745	0.674235	8.15074e-25	-0.669036	2.5001e-24	0.75822	0	0.180037	1.41676	0.292989	0	1.30604	0.322618	0.269169	0.612785	0.310109	0	1.06317	0.586333	0	0.269098	0.245391	0.190764	0.280374	0	0	1.09435	0	0.325644	0.267588	0	0
ENSMUSG00000029670	Ing3	inhibitor of growth family, member 3 [Source:MGI Symbol;Acc:MGI:1919027]	26467	blue	0.0298135	0.69364	0.03992	0.597813	-0.634395	2.54765e-21	0.236245	0.00154713	-0.275718	0.000203637	0.604906	4.80915e-19	0.0394403	0.602224	0.849444	1.83782e-50	-0.834337	3.92711e-47	1.47366	1.08949	1.03242	1.39566	1.17008	1.05096	1.47953	1.09772	1.09683	1.15335	0.858903	1.21723	1.6862	1.13664	1.21078	1.67001	1.04129	1.1512	1.85345	1.33529	1.23094	1.51979	1.02729	1.11879	1.529	1.16655	1.17752
ENSMUSG00000068748	Ptprz1	protein tyrosine phosphatase, receptor type Z, polypeptide 1 [Source:MGI Symbol;Acc:MGI:97816]	177414	blue	0.140348	0.0624329	-0.0309493	0.682588	-0.473793	2.72586e-11	0.556894	8.33331e-16	0.0930136	0.218185	0.226569	0.00242552	0.0659435	0.383178	0.772128	2.70198e-36	-0.725643	3.18281e-30	1.93596	1.52452	1.65108	1.94867	1.46003	1.64616	1.97016	1.66355	1.53699	1.69889	1.56496	1.62151	2.02621	1.65874	1.68914	1.98139	1.48996	1.47973	1.90464	1.47312	1.59728	1.89387	1.59963	1.67122	1.93107	1.70846	1.74983
ENSMUSG00000039629	Strip2	striatin interacting protein 2 [Source:MGI Symbol;Acc:MGI:2444363]	42669	blue	0.0137472	0.855891	0.0505706	0.50384	-0.741824	3.45163e-32	0.257091	0.00055155	-0.300264	4.8958e-05	0.696652	4.93726e-27	0.0452663	0.549661	0.939482	2.47596e-83	-0.953828	2.43093e-93	1.63998	0.423166	0.466195	1.32696	0.202628	0.428404	1.50154	0.720099	0.415307	1.47091	0.214854	0.452075	1.42682	0.193972	0.607245	1.62264	0.340355	0.216971	1.68541	0.344784	0.324259	1.48123	0.251941	0.558159	1.25353	0.254623	0.371303
ENSMUSG00000019689	Fmc1	formation of mitochondrial complex V assembly factor 1 [Source:MGI Symbol;Acc:MGI:1913367]	5947	blue	-0.104007	0.168308	-0.0538084	0.476888	-0.700725	1.85541e-27	0.0932086	0.217217	-0.436837	1.2114e-09	0.650546	1.128e-22	0.168084	0.0253317	0.903833	2.0199e-66	-0.865318	2.22419e-54	4.07204	2.62031	3.02077	4.2639	2.781	3.26107	4.28148	3.35085	2.72935	4.2602	2.72167	2.74865	4.31075	2.30977	3.25668	4.12661	2.9533	2.64152	4.30007	2.51197	2.68362	3.99405	2.3525	2.95952	4.34368	2.0585	3.03922
ENSMUSG00000079598	Clec2l	C-type lectin domain family 2, member L [Source:MGI Symbol;Acc:MGI:2141402]	17798	blue	-0.0137041	0.856338	0.014416	0.848962	-0.829232	4.4061e-46	0.141186	0.0608679	-0.417699	7.27824e-09	0.64116	7.06214e-22	0.225368	0.00256152	0.911768	1.53935e-69	-0.90218	8.3333e-66	2.13189	0.718224	0.89029	1.94527	0.868932	0.944505	2.11612	0.732021	0.729969	2.32348	0.682561	0.770455	2.0526	0.805307	0.838201	2.27989	0.887914	1.00368	2.4006	0.944544	0.918688	2.21566	0.93726	0.686892	2.24465	0.481969	1.0277
ENSMUSG00000115026	Gm49041	predicted gene, 49041 [Source:MGI Symbol;Acc:MGI:6118414]	543	blue	0.0469856	0.534589	-0.0199764	0.791848	-0.287817	0.000102521	0.251549	0.000731724	-0.0017423	0.981638	0.0831704	0.27108	0.15672	0.0372387	0.435323	1.40166e-09	-0.421494	5.14542e-09	1.45024	1.26889	2.32098	1.2599	0	1.03206	1.91364	0.957495	0	2.80064	2.20333	1.54985	2.09632	2.73426	0	2.02963	0	2.06633	2.079	3.10035	1.62509	0	2.24745	1.53785	3.34938	1.66304	1.67656
ENSMUSG00000029922	Mkrn1	makorin, ring finger protein, 1 [Source:MGI Symbol;Acc:MGI:1859353]	22658	blue	-0.0155739	0.836993	0.0596759	0.430103	-0.701434	1.56205e-27	-0.0170451	0.82184	-0.470436	3.92143e-11	0.625592	1.29111e-20	0.151215	0.0445273	0.727365	1.99684e-30	-0.724779	4.01538e-30	1.769	1.23352	1.51991	1.97874	1.17478	1.43449	1.89505	1.36745	0.971419	1.9126	1.53649	1.13831	1.89092	1.12059	1.23406	1.92888	1.24461	1.30869	1.69663	1.47474	1.27727	1.8304	1.36292	1.54401	1.87978	1.06384	1.09209
ENSMUSG00000002416	Ndufb2	NADH:ubiquinone oxidoreductase subunit B2 [Source:MGI Symbol;Acc:MGI:1915448]	10808	blue	-0.134522	0.0742383	-0.0201912	0.789661	-0.623076	2.03406e-20	0.142194	0.0590292	-0.223741	0.00275671	0.292274	7.89867e-05	0.406416	1.99003e-08	0.601187	8.96527e-19	-0.593195	3.32687e-18	3.00909	2.44946	2.50297	2.9368	2.76194	2.607	3.28686	2.31474	2.66568	3.23184	2.68575	2.59373	3.07157	2.42109	2.48871	3.39586	2.17037	2.19449	3.49686	2.69625	2.18932	2.93459	2.513	2.39394	2.45002	2.32997	2.33004
ENSMUSG00000037172	Dennd11	DENN domain containing 11 [Source:MGI Symbol;Acc:MGI:2444256]	34760	blue	0.00925922	0.902649	0.0397933	0.598976	-0.728171	1.60362e-30	0.0454956	0.547639	-0.445197	5.34059e-10	0.742266	3.03616e-32	0.0605013	0.423741	0.79333	1.44852e-39	-0.811128	1.27256e-42	1.42116	1.02507	0.881946	1.34879	0.842615	0.847879	1.66069	0.901608	0.937582	1.4043	0.815855	0.759298	1.55816	0.640992	0.728892	1.35908	0.969417	1.07881	1.45321	0.774091	0.983268	1.47375	0.816578	0.885579	1.24131	0.830683	0.782922
ENSMUSG00000029860	Zyx	zyxin [Source:MGI Symbol;Acc:MGI:103072]	10583	blue	0.0779602	0.302346	0.012925	0.864424	-0.541826	6.81499e-15	-0.056294	0.456739	-0.343368	2.88422e-06	0.294549	6.90304e-05	0.262104	0.000424804	0.419241	6.32501e-09	-0.406651	1.94938e-08	1.16641	1.24752	1.19008	1.44231	1.03015	1.01341	1.35728	1.23464	0.903241	1.01479	1.0772	0.880323	1.3768	1.11132	1.38921	1.3684	0.893904	1.10103	1.2165	1.06243	1.19125	1.1161	1.28833	1.01832	1.27197	1.63802	0.839116
ENSMUSG00000052763	Zfp212	Zinc finger protein 212 [Source:MGI Symbol;Acc:MGI:2682609]	12163	blue	-0.0879732	0.244272	-0.105316	0.162986	-0.457079	1.60391e-10	0.0481051	0.524887	-0.237837	0.00143424	-0.0478873	0.526767	0.5201	1.17994e-13	0.4174	7.47846e-09	-0.311477	2.44266e-05	1.05856	0.911586	0.986483	0.997323	0.931191	0.765324	0.637841	0.847176	0.922114	1.10731	1.33863	0.928807	1.21185	1.23036	0.787301	0.868541	1.04114	0.512984	0.952994	1.14902	1.017	1.33565	1.17318	1.26438	1.06648	1.2353	0.835547
ENSMUSG00000068551	Zfp467	zinc finger protein 467 [Source:MGI Symbol;Acc:MGI:1916160]	18128	blue	0.0527292	0.485783	-0.0132608	0.860937	-0.771207	3.67957e-36	0.262525	0.000415499	-0.313765	2.11218e-05	0.494109	2.76755e-12	0.257657	0.000535652	0.921079	1.34744e-73	-0.875301	4.15561e-57	1.78203	0.744711	1.07544	1.60747	0.730449	0.907966	1.83588	0.990958	0.759412	1.59732	1.0186	1.06845	1.76735	0.885043	0.872453	1.78542	0.808603	0.990459	1.70939	0.965793	1.06539	1.94649	0.924657	0.956675	1.77911	0.980808	1.03757
ENSMUSG00000009281	Rarres2	retinoic acid receptor responder (tazarotene induced) 2 [Source:MGI Symbol;Acc:MGI:1918910]	3093	blue	0.039735	0.599512	-0.00805509	0.915258	-0.0989753	0.189969	0.138888	0.0652359	-0.0456786	0.546028	0.389391	8.47315e-08	-0.272238	0.000246649	0.397007	4.47664e-08	-0.433386	1.68772e-09	2.01493	0.99275	1.4616	1.30404	0.919553	1.67869	1.29726	1.72905	1.23481	2.1674	0.963057	0.420565	1.28564	0.99468	2.06699	1.53324	0.794188	0.804289	1.82697	0.340294	1.67619	0.80659	1.98597	2.17282	0.853494	0.465091	1.34628
ENSMUSG00000052751	Repin1	replication initiator 1 [Source:MGI Symbol;Acc:MGI:1889817]	5199	blue	-0.011101	0.88341	0.00130737	0.986221	-0.579528	2.88512e-17	0.15734	0.0364844	-0.325128	1.00797e-05	0.661694	1.17173e-23	-0.0545326	0.470968	0.846462	8.90948e-50	-0.821141	1.73385e-44	3.54549	2.93088	3.01726	3.89134	2.94828	3.18208	3.8807	3.01494	2.76503	3.93876	2.99392	3.06167	4.0799	2.86772	3.10291	3.67275	3.17101	3.15067	3.57863	2.93486	3.07084	3.79945	2.29718	2.95603	4.2173	2.5242	3.08003
ENSMUSG00000051124	Gimap9	GTPase, IMAP family member 9 [Source:MGI Symbol;Acc:MGI:3511744]	2985	blue	-0.0389525	0.606725	0.0414939	0.583441	-0.306037	3.43484e-05	0.226659	0.00241561	-0.00941305	0.90104	0.0299246	0.692556	0.197877	0.00828831	0.345221	2.52864e-06	-0.323692	1.10855e-05	0.705165	0.329351	0.627867	1.01071	0.6923	0.464847	0	0.228169	0.3567	0.445565	0	0.766717	0	0	0.762055	0.356609	0.326024	0	0.371105	0.351221	0.250484	0	0.423242	0	0	0.479405	0.485007
ENSMUSG00000090019	Gimap1	GTPase, IMAP family member 1 [Source:MGI Symbol;Acc:MGI:109368]	4741	blue	-0.0622114	0.410734	0.0352687	0.641187	-0.415122	9.18827e-09	0.22954	0.00211676	-0.0989986	0.189864	0.213496	0.00432779	0.15762	0.0361485	0.511686	3.37454e-13	-0.523532	7.62176e-14	0.482193	0.215944	0.29734	0	0	0.309597	0.397234	0.147805	0.234627	0.934552	0.270791	0.151082	0.644174	0.281982	0.149959	0	0.213678	0.16571	0.63606	0.230875	0.563172	0.723853	0	0	0	0.319819	0.323761
ENSMUSG00000043496	Tril	TLR4 interactor with leucine-rich repeats [Source:MGI Symbol;Acc:MGI:1914123]	5362	blue	0.00907481	0.904579	-0.0242537	0.748638	-0.680991	1.83469e-25	0.169437	0.0241601	-0.343568	2.84363e-06	0.611511	1.55933e-19	0.0603918	0.424582	0.856977	2.91349e-52	-0.83877	4.49599e-48	3.41276	2.61812	2.90223	3.3677	2.53601	2.99713	3.54229	2.64301	2.62127	3.44235	2.4761	2.55601	3.2916	2.66543	2.54661	3.73685	2.9589	2.34755	3.17022	2.80414	2.83229	3.41279	2.74286	2.44197	3.40857	2.36994	2.47515
ENSMUSG00000004633	Chn2	chimerin 2 [Source:MGI Symbol;Acc:MGI:1917243]	262256	blue	0.0270392	0.720905	-0.0185896	0.806001	-0.863368	7.15808e-54	0.262946	0.000406362	-0.345908	2.40761e-06	0.529141	3.69173e-14	0.302637	4.23592e-05	0.968663	8.68081e-108	-0.932373	3.00779e-79	1.85832	0.250632	0.163485	1.94283	0.211284	0.142545	2.0852	0.26409	0.221585	1.79882	0.214743	0.181064	2.14365	0.214119	0.179732	2.1414	0.21971	0.289527	2.01971	0.16653	0.258684	2.18445	0.306512	0.206287	2.3392	0.193539	0.155366
ENSMUSG00000059486	Kbtbd2	kelch repeat and BTB (POZ) domain containing 2 [Source:MGI Symbol;Acc:MGI:2384811]	20289	blue	0.0355714	0.638325	0.0740366	0.327403	-0.50183	1.11446e-12	0.0197899	0.793747	-0.3384	4.08775e-06	0.715153	5.04805e-29	-0.117773	0.118474	0.618828	4.34055e-20	-0.671308	1.53621e-24	1.60417	1.01343	0.849788	1.33942	1.06163	0.900684	1.39481	1.16044	0.835179	1.43486	0.974474	1.42055	1.59296	1.07705	0.980136	1.51425	1.10864	1.18897	1.49192	0.920042	1.08122	1.43984	0.889646	1.0136	1.54946	0.989762	1.16001
ENSMUSG00000108080	Gm10209	predicted gene 10209 [Source:MGI Symbol;Acc:MGI:3641874]	1606	blue	-0.100708	0.182289	0.0369839	0.625041	-0.473786	2.72811e-11	0.272942	0.000237322	-0.107882	0.152921	0.324809	1.02955e-05	0.161649	0.0315932	0.659633	1.79417e-23	-0.662925	9.07235e-24	1.11874	0	0	1.52925	0	0.436485	0.952888	0.39887	1.03046	2.33208	0	0	1.07567	0	0	1.62516	0	0.442883	2.42271	0.596762	0	0.972148	0	0.402517	2.85117	0	0.4556
ENSMUSG00000049232	Tigd2	tigger transposable element derived 2 [Source:MGI Symbol;Acc:MGI:1915390]	3163	blue	-0.00962617	0.898811	-0.0557343	0.461234	-0.414913	9.36209e-09	0.215051	0.00404653	-0.173383	0.0210062	0.425789	3.4575e-09	0.0303776	0.688143	0.685846	6.12848e-26	-0.645493	3.05242e-22	3.98836	3.38386	3.51896	4.18904	3.55486	3.92331	4.10048	3.73222	3.20257	3.73264	3.70813	3.7093	3.85781	3.13181	3.66188	3.95929	3.26518	3.64315	4.04464	3.60709	3.59622	4.15764	3.68983	3.36649	3.84932	3.36452	3.95592
ENSMUSG00000036390	Gadd45a	growth arrest and DNA-damage-inducible 45 alpha [Source:MGI Symbol;Acc:MGI:107799]	2361	blue	0.0373144	0.621949	0.0636468	0.400001	-0.656912	3.13189e-23	0.0888884	0.239381	-0.327807	8.42892e-06	0.432137	1.90132e-09	0.229741	0.00209721	0.632415	3.6871e-21	-0.634265	2.61074e-21	2.31748	1.55844	0.940498	1.54829	1.73807	1.54725	2.36102	1.05878	1.04536	2.35539	0.500393	1.35154	2.36293	1.45094	1.7738	2.0672	1.38008	1.88306	2.44638	2.04838	1.13658	2.20105	1.19732	1.34046	1.9331	1.58178	1.91786
ENSMUSG00000053012	Krcc1	lysine-rich coiled-coil 1 [Source:MGI Symbol;Acc:MGI:1889377]	13642	blue	-0.0748121	0.322347	0.0401009	0.596153	-0.482881	9.98188e-12	0.255957	0.00058468	-0.150685	0.0452869	0.648427	1.71621e-22	-0.0977976	0.19532	0.732709	4.59675e-31	-0.772611	2.29696e-36	1.68112	1.00722	1.20941	1.55734	0.9585	1.19495	1.90843	1.36439	1.11511	1.82115	0.896116	1.18024	1.79812	0.926173	1.29076	1.91114	0.783448	0.850969	1.67009	1.1416	1.05567	1.82681	0.804057	1.17006	1.30072	1.35189	1.03507
ENSMUSG00000002222	Rmnd5a	required for meiotic nuclear division 5 homolog A [Source:MGI Symbol;Acc:MGI:1915727]	52003	blue	-0.0221027	0.770279	0.0541819	0.473829	-0.601674	8.2674e-19	0.0877419	0.245519	-0.404078	2.43975e-08	0.874788	5.81571e-57	-0.15987	0.03354	0.837332	9.1473e-48	-0.871645	4.409e-56	1.85002	1.12275	1.20423	1.58968	0.786334	1.01058	1.77714	1.25507	0.812886	1.67881	0.762529	1.22568	1.71145	0.739082	1.18793	1.73023	1.12359	1.42584	1.67308	0.802091	1.05482	1.84756	0.59342	1.05887	1.38719	0.912568	1.14773
ENSMUSG00000052656	Rnf103	ring finger protein 103 [Source:MGI Symbol;Acc:MGI:109483]	16987	blue	0.0690836	0.360887	-0.0144553	0.848555	-0.485014	7.85071e-12	0.136311	0.0704356	-0.212701	0.00447815	0.593585	3.12331e-18	-0.0752545	0.319486	0.602739	6.91978e-19	-0.633749	2.87534e-21	1.38188	1.20592	1.28526	1.19722	1.09512	0.952531	1.27231	1.23568	1.22083	1.7453	0.898687	1.27345	1.5286	1.2544	0.915769	1.61802	1.07989	1.23808	1.75325	1.14463	1.15883	1.7306	1.05546	1.14861	1.58873	1.07603	1.06238
ENSMUSG00000108594	Gm44770	predicted gene 44770 [Source:MGI Symbol;Acc:MGI:5753346]	1263	blue	0.0689594	0.361752	0.0574016	0.447916	-0.265247	0.000359709	0.504963	7.65464e-13	0.24735	0.000902768	-0.104245	0.16733	0.197985	0.00825261	0.347847	2.09522e-06	-0.349949	1.8004e-06	0.803118	0.683557	0	0.677764	0	0.535309	0.673497	0.490534	0	1.4385	0	0.870932	1.26815	0	0.496901	0	0	0	0	0	0	0	0	0.494885	0	0	0.557977
ENSMUSG00000101823	Gm29438	predicted gene 29438 [Source:MGI Symbol;Acc:MGI:5580144]	2612	blue	0.0415686	0.582763	0.123715	0.100887	-0.575371	5.45577e-17	0.511194	3.58499e-13	0.0619887	0.412415	0.202087	0.00698763	0.236579	0.00152276	0.637331	1.46562e-21	-0.626527	1.08939e-20	1.81607	0.66552	0.872522	1.96332	0	0	1.72307	0.257995	0.401137	0.869508	0.459178	0.263502	1.89697	0.476963	0.482994	1.54732	0.902487	0	0.740251	0.395064	0.282952	1.75076	0	0.260468	0.711029	0.536507	0.54266
ENSMUSG00000108435	Gm45051	predicted gene 45051 [Source:MGI Symbol;Acc:MGI:5753627]	1429	blue	0.0577649	0.445043	-0.0571386	0.450002	-0.528023	4.27005e-14	0.111765	0.138596	-0.283426	0.000131994	0.441262	7.87415e-10	0.122086	0.105489	0.648121	1.82301e-22	-0.634477	2.50876e-21	1.21206	1.65203	0.815038	1.37295	0	0.843284	2.05483	1.8096	0.665315	1.70821	1.24489	1.06959	2.97213	0	1.06367	2.89593	1.64088	1.14501	2.02282	1.10538	1.12974	2.08497	1.2776	1.96102	1.96744	0	0.503196
ENSMUSG00000058706	0610030E20Rik	RIKEN cDNA 0610030E20 gene [Source:MGI Symbol;Acc:MGI:1915614]	5831	blue	-0.0644091	0.394369	0.0158377	0.834271	-0.598952	1.29839e-18	0.505679	7.02119e-13	0.0182065	0.809923	0.226509	0.0024321	0.255761	0.000590591	0.736894	1.41884e-31	-0.709169	2.31174e-28	2.1336	1.57008	1.41945	2.40225	1.68117	1.46025	2.46211	1.46169	1.65711	2.05277	1.50924	2.01863	2.39814	1.26549	1.56528	2.28564	0.93251	1.57497	2.10558	1.76502	1.77677	2.1941	1.78386	1.51669	2.09805	1.27051	1.74521
ENSMUSG00000050732	Vamp8	vesicle-associated membrane protein 8 [Source:MGI Symbol;Acc:MGI:1336882]	5480	blue	0.017859	0.813484	-0.0681817	0.367205	-0.486351	6.74852e-12	0.402718	2.74485e-08	-0.0205774	0.785735	0.288081	0.000100963	0.170639	0.023159	0.728764	1.36403e-30	-0.685259	7.00654e-26	1.02151	1.34289	1.36966	1.68316	1.0046	1.1651	1.73595	1.26304	0.938641	1.47192	0.920772	0.96727	1.8468	1.08442	1.2183	1.15182	0.634548	0.706485	1.76417	1.40685	0.600649	1.57193	0.947522	1.70642	1.41675	0	0.725073
ENSMUSG00000069678	Pcgf1	polycomb group ring finger 1 [Source:MGI Symbol;Acc:MGI:1917087]	2986	blue	-0.0339272	0.653935	-0.0586354	0.438202	-0.322635	1.18864e-05	0.114478	0.129209	-0.100878	0.181552	0.247705	0.000887007	0.0864788	0.252408	0.361792	7.5031e-07	-0.375975	2.5085e-07	1.81577	0	0.627696	1.01046	0	1.0977	0.588117	0.892545	0.880645	1.48987	0.409059	0.766518	0.674251	0.425176	0.430645	0.880456	0.325926	0.254905	1.3023	0.351116	0.96178	1.19736	0.749874	0.230307	0.638945	0.479268	0.484869
ENSMUSG00000030035	Wbp1	WW domain binding protein 1 [Source:MGI Symbol;Acc:MGI:104710]	2515	blue	-0.0607361	0.421941	0.000833313	0.991217	-0.0560196	0.45894	0.275135	0.000210322	0.079705	0.291621	0.313478	2.15125e-05	-0.208344	0.00538917	0.422548	4.66952e-09	-0.395747	4.9806e-08	1.99729	1.14893	2.15433	2.20592	1.06793	1.59954	1.76135	2.08878	1.87314	1.83867	1.11612	2.36803	2.18165	0.859051	2.10562	2.50066	1.48832	1.61591	2.46627	0.986558	1.79719	1.78935	1.3888	2.2941	2.21365	0.952825	2.02954
ENSMUSG00000045160	Bola3	bolA-like 3 (E. coli) [Source:MGI Symbol;Acc:MGI:1925903]	10989	blue	0.0385307	0.61063	-0.139149	0.0647274	-0.649924	1.27639e-22	0.322769	1.17816e-05	-0.119255	0.11388	0.114167	0.130258	0.518803	1.38989e-13	0.694551	8.12771e-27	-0.617188	5.79828e-20	2.20026	1.72194	1.91259	2.28082	1.77639	2.03493	2.02751	2.00912	1.7493	2.08528	1.56545	1.63029	1.90768	1.77458	1.70858	2.4173	1.61646	1.79415	2.24643	1.94305	2.18705	2.36358	1.84523	1.89834	2.41007	2.11075	1.61463
ENSMUSG00000099354	1700124L16Rik	RIKEN cDNA 1700124L16 gene [Source:MGI Symbol;Acc:MGI:1915184]	1109	blue	-0.0150451	0.842455	-0.101253	0.179924	-0.579923	2.71437e-17	0.186375	0.0129993	-0.240822	0.00124278	0.181598	0.0155617	0.328972	7.79464e-06	0.65562	4.07199e-23	-0.580203	2.59895e-17	2.79455	1.6186	1.30315	1.60824	2.36293	1.34194	1.8915	1.91349	1.70706	2.77478	2.43651	1.7484	2.72561	2.22998	1.26593	2.00686	0.75058	1.35673	2.05598	0.800674	1.33973	2.37248	0.939356	1.26189	2.64405	1.64242	1.05349
ENSMUSG00000014748	Tex261	testis expressed gene 261 [Source:MGI Symbol;Acc:MGI:1096575]	6928	blue	0.00836444	0.912017	-0.0199593	0.792022	-0.712644	9.59838e-29	0.276689	0.000192948	-0.266036	0.000344893	0.539379	9.49305e-15	0.145793	0.052836	0.903509	2.67236e-66	-0.869935	1.29817e-55	3.19338	2.28311	2.82953	3.60296	2.88134	2.96305	3.84202	2.8184	2.81612	3.83309	2.50147	2.72044	3.70803	2.3607	2.91101	3.95403	2.42488	2.41449	3.80923	2.86679	2.36915	3.82313	2.31214	2.87598	3.647	2.52489	2.5197
ENSMUSG00000063415	Cyp26b1	cytochrome P450, family 26, subfamily b, polypeptide 1 [Source:MGI Symbol;Acc:MGI:2176159]	22494	blue	-0.0126246	0.867546	-0.0544328	0.471781	-0.601962	7.87917e-19	0.362991	6.85291e-07	-0.124135	0.0997276	0.361729	7.53867e-07	0.19702	0.0085783	0.835864	1.87462e-47	-0.775642	8.21185e-37	1.58857	0.888134	1.00937	1.56211	0.362935	0.749378	1.30439	0.628274	0.739845	1.49809	0.646826	0.723807	1.51527	1.15602	1.01137	1.29351	0.85402	0.299699	1.26386	1.01734	0.612006	1.61353	0.707881	1.22196	2.07638	0.606982	0.986226
ENSMUSG00000033720	Sfxn5	sideroflexin 5 [Source:MGI Symbol;Acc:MGI:2137681]	120373	blue	-0.0707274	0.349545	-0.112555	0.13581	-0.725635	3.18897e-30	0.102615	0.174109	-0.395557	5.061e-08	0.268026	0.000309979	0.463771	7.98006e-11	0.771408	3.4397e-36	-0.677039	4.41083e-25	1.15005	0.874269	0.980806	1.26866	1.0701	0.954592	1.29173	0.867355	0.934471	1.16816	0.988388	0.990635	1.14526	1.00233	0.966023	1.22778	1.00885	0.904968	1.26976	0.825694	0.987453	1.0903	0.929515	0.972149	1.51553	1.05325	0.927309
ENSMUSG00000107370	Gm43588	predicted gene 43588 [Source:MGI Symbol;Acc:MGI:5663725]	2297	blue	0.109967	0.145098	0.0524032	0.488488	-0.65369	6.01394e-23	0.456214	1.75356e-10	-0.0314147	0.678078	0.195286	0.00919194	0.334766	5.25571e-06	0.718857	1.92997e-29	-0.689926	2.39889e-26	1.39958	0.414958	0.55817	1.5745	0.485591	0.318485	0.986498	0.290034	0.44838	0	0	0	1.55394	1.22443	0	0.789775	0.410882	0.587318	1.10005	0.441695	0.798416	1.74568	0.529127	0	2.2084	0	0.333011
ENSMUSG00000107278	Gm42600	predicted gene 42600 [Source:MGI Symbol;Acc:MGI:5662737]	3587	blue	0.0188201	0.803644	0.0677251	0.37043	-0.507409	5.69427e-13	0.440995	8.0829e-10	0.0149402	0.843539	0.318045	1.60411e-05	0.0995439	0.187424	0.68269	1.25311e-25	-0.663284	8.41757e-24	0.837391	0.279066	0	1.18069	0.329123	0.396563	1.17433	0.192308	0.765752	0.928546	0	0.663281	1.16341	0	0.195068	0.552577	0.507922	0.402453	1.3014	0	0.395687	1.32603	0	0	1.11075	0	0
ENSMUSG00000079494	Nat8f5	N-acetyltransferase 8 (GCN5-related) family member 5 [Source:MGI Symbol;Acc:MGI:1916299]	3754	blue	0.0532426	0.48154	-0.0531288	0.482479	-0.564585	2.73509e-16	0.0446633	0.554996	-0.321966	1.24208e-05	0.464603	7.30881e-11	0.144541	0.0549265	0.619897	3.5902e-20	-0.610914	1.72837e-19	0.808849	0.493474	0.366311	0.853596	0.315972	0	0.848511	0.347659	0.532137	1.28606	0	0.188311	1.41066	0.627828	0.500815	1.22517	0.488749	0.206293	1.63193	0	0.380209	0.497179	0	0.350892	0.735348	0.393332	0.562285
ENSMUSG00000030004	Nat8	N-acetyltransferase 8 (GCN5-related) [Source:MGI Symbol;Acc:MGI:1915646]	1694	blue	0.0930229	0.218139	0.00163764	0.982741	-0.348595	1.98547e-06	0.2398	0.00130552	-0.0728674	0.33512	0.332487	6.1429e-06	-0.0331702	0.661172	0.558725	6.40824e-16	-0.540837	7.79484e-15	1.68769	0.53793	1.18974	2.19431	0	1.22639	0.529638	0.68155	0.991692	1.828	0	1.34761	2.05327	1.77254	1.15462	1.31171	0.532853	0.749581	1.02418	0.571147	1.7393	0.54191	0	1.64877	1.98056	0.760914	1.03997
ENSMUSG00000057103	Nat8f1	N-acetyltransferase 8 (GCN5-related) family member 1 [Source:MGI Symbol;Acc:MGI:1913366]	5533	blue	-0.0601025	0.426808	-0.0033892	0.96429	-0.683389	1.07037e-25	0.211097	0.00479608	-0.282046	0.00014278	0.357347	1.04645e-06	0.343035	2.95305e-06	0.780379	1.59314e-37	-0.715848	4.21951e-29	2.39251	2.06422	1.65868	2.89403	1.65975	1.87432	2.65452	1.30978	1.49359	1.97387	1.79776	1.86741	2.37288	1.60151	1.70159	2.30255	1.40135	1.57609	2.44126	2.36841	1.87167	2.2952	1.50555	1.47237	2.38123	1.73948	1.84275
ENSMUSG00000030002	Dusp11	dual specificity phosphatase 11 (RNA/RNP complex 1-interacting) [Source:MGI Symbol;Acc:MGI:1919352]	19399	blue	0.0922225	0.222143	0.142677	0.0581655	-0.487737	5.76464e-12	0.670766	1.7259e-24	0.2225	0.0029146	0.280868	0.000152638	0.0119423	0.874644	0.722355	7.67301e-30	-0.742904	2.52173e-32	1.17689	0.901599	0.764857	1.21873	0.649465	0.690849	1.21223	0.840745	0.757509	0.960913	1.11141	0.789522	1.50288	0.923605	0.668073	1.08533	0.434175	0.726341	1.14973	0.63355	0.689463	1.48104	0.657251	0.641069	1.0209	0.683941	0.84746
ENSMUSG00000051695	Pcbp1	poly(rC) binding protein 1 [Source:MGI Symbol;Acc:MGI:1345635]	1829	blue	-0.0825158	0.274883	-0.0582264	0.441409	-0.670413	1.86184e-24	0.270546	0.000270493	-0.246719	0.000931433	0.481378	1.181e-11	0.195215	0.0092179	0.867739	5.0836e-55	-0.813824	4.10555e-43	6.77519	5.73652	5.63368	6.63138	6.20692	5.90552	6.71905	5.91372	5.94079	7.31531	5.94197	5.78364	7.07921	6.06666	5.96186	6.87896	6.01629	5.91446	6.66586	5.82736	5.80944	6.88219	5.87941	5.91506	6.98337	5.6407	5.72372
ENSMUSG00000001156	Mxd1	MAX dimerization protein 1 [Source:MGI Symbol;Acc:MGI:96908]	22119	blue	-0.136835	0.0693515	0.0238422	0.752763	-0.701409	1.57162e-27	-0.101453	0.179061	-0.568303	1.57952e-16	0.595278	2.37213e-18	0.222888	0.00286445	0.749371	3.72012e-33	-0.718008	2.40879e-29	1.04496	0.788077	0.667838	1.04367	0.905094	0.864633	1.23808	0.836896	0.988543	1.05263	0.914636	0.851649	1.31493	0.799331	0.622933	1.21691	0.837543	0.974748	1.20563	1.13115	0.979901	1.23983	0.87041	0.969382	1.23508	0.969003	0.998288
ENSMUSG00000108291	Gm44292	predicted gene, 44292 [Source:MGI Symbol;Acc:MGI:5690684]	2363	blue	0.112356	0.136506	0.193174	0.00999158	-0.376083	2.4873e-07	0.453878	2.22797e-10	0.107482	0.15446	0.247772	0.000884071	0.0357272	0.636854	0.546553	3.56515e-15	-0.576532	4.57039e-17	0.844988	0.404851	0.545184	0.401097	0	0.310481	1.9493	0.518938	0	0.543094	0.500035	0.288659	1.86193	0.519137	0.28661	0.437467	0	0.79296	1.84555	0.431029	0.309775	0	0.516702	0.523497	1.63797	0	1.17756
ENSMUSG00000108216	Gm44153	predicted gene, 44153 [Source:MGI Symbol;Acc:MGI:5690545]	1579	blue	0.172807	0.0214432	0.00349843	0.96314	-0.316416	1.7821e-05	0.400483	3.32763e-08	0.159871	0.0335391	-0.0110697	0.883737	0.172529	0.0216569	0.33171	6.47625e-06	-0.338812	3.97217e-06	0	0	0	1.54528	0	0	0.561568	0.720578	0	0	0.695931	0.413036	0	1.1993	0.410223	1.64174	0	0.44939	0.636494	0	0	0.574443	0.717667	0	0.610552	0	0.462265
ENSMUSG00000108152	Gm44152	predicted gene, 44152 [Source:MGI Symbol;Acc:MGI:5690544]	1690	blue	0.141749	0.0598368	0.149264	0.0473804	-0.340836	3.44779e-06	0.670833	1.70149e-24	0.348794	1.95712e-06	-0.0377094	0.618263	0.176613	0.0186954	0.444905	5.49773e-10	-0.448389	3.88344e-10	1.07952	0	0.401671	1.69632	0	0	1.22271	0.381445	0	0	0	0	0.610058	0	0.691158	0	0.533907	0	0	0	0	1.71585	0	0.384952	0.988761	0	0
ENSMUSG00000107576	Gm44093	predicted gene, 44093 [Source:MGI Symbol;Acc:MGI:5690485]	1801	blue	0.0245845	0.745327	0.0405811	0.591756	-0.46269	8.94168e-11	0.459935	1.19292e-10	0.0869845	0.249635	0.144157	0.0555808	0.229389	0.00213155	0.618713	4.42973e-20	-0.615782	7.42172e-20	1.36013	0.511003	0	0.880532	0.594897	0	1.17098	0	0	2.53552	0	0	0.991146	0	0	0.550664	0	0	0.571619	0	0.394245	0.514818	0	0	1.25442	0	0
ENSMUSG00000108064	Gm44423	predicted gene, 44423 [Source:MGI Symbol;Acc:MGI:5690815]	3157	blue	-0.0913952	0.226335	0.0349542	0.644166	-0.372818	3.21589e-07	0.399595	3.59076e-08	0.062301	0.41006	0.0578472	0.444394	0.192866	0.0101136	0.473061	2.95175e-11	-0.470072	4.07829e-11	0.674451	0.313218	0.228796	0.565405	0	0.238456	1.27981	0	0.339378	0.424528	0.389636	0.221314	0	0	0.410336	0	0	0	0	0	0.237901	0.315716	0	0	0	0.457009	0.249641
ENSMUSG00000030082	Sec61a1	Sec61 alpha 1 subunit (S. cerevisiae) [Source:MGI Symbol;Acc:MGI:1858417]	15326	blue	-0.06918	0.360215	-0.11236	0.136493	-0.587206	8.68114e-18	0.347379	2.16697e-06	-0.124897	0.0976465	0.181163	0.0158154	0.357382	1.04372e-06	0.764967	2.86816e-35	-0.66834	2.89949e-24	2.33666	1.8668	1.76861	2.14071	1.5749	1.78387	2.28487	1.61782	1.54205	2.10848	1.8807	1.40016	2.30642	1.45216	1.53483	2.15081	1.52436	1.42995	2.01009	1.35438	1.50916	2.45544	1.70386	1.5303	2.62212	1.58306	1.53942
ENSMUSG00000030087	Klf15	Kruppel-like factor 15 [Source:MGI Symbol;Acc:MGI:1929988]	12662	blue	0.0294411	0.697278	0.115502	0.125796	-0.33392	5.56952e-06	0.361872	7.45781e-07	0.0117949	0.87618	0.513343	2.74982e-13	-0.180893	0.0159751	0.640436	8.11375e-22	-0.662044	1.08959e-23	1.31381	0.884706	1.02032	1.21158	1.01171	0.989762	1.31242	1.3188	0.612587	1.13373	0.761939	0.99429	1.60274	0.978125	0.896305	1.37102	1.09471	0.671266	1.77416	0.603924	0.701132	1.11027	0.974155	0.955164	1.16883	0.639268	0.810333
ENSMUSG00000030061	Uba3	ubiquitin-like modifier activating enzyme 3 [Source:MGI Symbol;Acc:MGI:1341217]	21977	blue	0.0180708	0.811313	0.0160597	0.831982	-0.400579	3.30032e-08	0.119958	0.111751	-0.145978	0.0525325	0.522073	9.18265e-14	-0.0151483	0.841388	0.430616	2.19664e-09	-0.502748	9.98806e-13	1.43951	1.03207	0.972916	1.31142	0.941203	0.827449	0.943464	1.03371	0.965279	1.02297	0.952596	1.06734	1.17292	0.841284	0.773071	1.49987	0.896052	1.1597	1.46105	1.06054	0.946437	1.26642	1.04619	1.09005	0.813156	0.806962	1.20325
ENSMUSG00000108122	Gm44116	predicted gene, 44116 [Source:MGI Symbol;Acc:MGI:5690508]	1524	blue	-0.0538155	0.476829	0.0898353	0.234393	-0.475592	2.23956e-11	0.31128	2.47321e-05	-0.0706555	0.350037	0.294621	6.87353e-05	0.125035	0.0972751	0.626406	1.11364e-20	-0.650363	1.16969e-22	1.16002	0	0.439363	0.582037	0	0.45661	0.989933	1.00492	0	2.39298	0	0	0.663253	0	0	1.06934	0	0.463258	0.654949	0	0.455621	1.33357	0	0	2.09597	0	0.476469
ENSMUSG00000107511	Gm44440	predicted gene, 44440 [Source:MGI Symbol;Acc:MGI:5690832]	2372	blue	0.0376134	0.619158	0.0407892	0.589856	-0.523832	7.33455e-14	0.507519	5.6181e-13	0.0365038	0.629542	0.329437	7.5542e-06	0.0801908	0.288681	0.759989	1.41102e-34	-0.771153	3.74583e-36	1.37098	0	0	1.6938	0	0	1.53639	0	0	2.0661	0.868175	0.287666	0.807342	0	0	1.04169	0	0	0.797681	0	0.308717	1.39393	0.515053	0	1.26474	0	0.587711
ENSMUSG00000034648	Lrrn1	leucine rich repeat protein 1, neuronal [Source:MGI Symbol;Acc:MGI:106038]	40446	blue	0.000682778	0.992804	-0.0284864	0.706636	-0.602545	7.14823e-19	0.263492	0.000394815	-0.259613	0.000483969	0.690822	1.94796e-26	-0.0529744	0.483754	0.914518	1.0896e-70	-0.915592	3.78032e-71	1.68243	0.797536	1.08868	1.37388	1.01625	1.10457	1.69952	1.10485	0.60172	1.83337	0.615831	0.959547	1.77362	0.661724	1.09079	1.9548	0.625431	0.812441	1.7202	0.705426	0.943777	1.53124	0.769377	1.16317	1.75073	0.551341	1.00194
ENSMUSG00000030102	Itpr1	inositol 1,4,5-trisphosphate receptor 1 [Source:MGI Symbol;Acc:MGI:96623]	338013	blue	0.052745	0.485653	-0.00382852	0.959665	-0.923015	1.67106e-74	0.224781	0.0026304	-0.36765	4.8025e-07	0.450635	3.0974e-10	0.401181	3.13411e-08	0.90295	4.32017e-66	-0.868397	3.38469e-55	2.05912	0.863797	0.691321	2.04699	1.02771	0.671351	2.19994	0.635819	0.96618	2.0776	1.03649	0.737605	2.07487	1.04244	0.685635	2.26859	1.0103	0.787075	2.21564	1.01777	0.75404	2.01147	0.995356	0.641197	2.17455	0.968828	0.693804
ENSMUSG00000086429	Gt(ROSA)26Sor	gene trap ROSA 26, Philippe Soriano [Source:MGI Symbol;Acc:MGI:104735]	10451	blue	0.154409	0.0401646	-0.00274006	0.971126	-0.399776	3.53553e-08	0.342888	2.98384e-06	0.0612437	0.418066	0.0869339	0.249911	0.188967	0.0117702	0.482728	1.01542e-11	-0.449851	3.35246e-10	2.02169	1.57418	1.06364	1.90835	1.41741	1.42387	1.62529	1.54035	1.76699	2.17438	1.89383	1.58655	2.02288	1.65734	1.40043	2.1776	1.45316	1.49679	2.22851	1.64416	0.941582	1.61782	1.4609	1.44935	1.65497	1.30075	1.31249
ENSMUSG00000001632	Brpf1	bromodomain and PHD finger containing, 1 [Source:MGI Symbol;Acc:MGI:1926033]	17723	blue	0.104851	0.164864	0.00343978	0.963757	-0.762065	7.29703e-35	0.368212	4.59924e-07	-0.14474	0.0545894	0.310623	2.578e-05	0.339014	3.91655e-06	0.803937	2.38384e-41	-0.766184	1.93132e-35	1.46032	1.25227	0.794694	1.50464	0.989427	0.822416	1.58143	0.921919	0.772842	1.88031	0.995787	0.696168	1.74796	1.18294	0.817092	1.59971	0.987111	0.983172	1.81546	0.76245	0.846682	1.7075	1.24983	0.837832	1.59376	1.21894	1.00685
ENSMUSG00000030302	Atp2b2	ATPase, Ca++ transporting, plasma membrane 2 [Source:MGI Symbol;Acc:MGI:105368]	298782	blue	0.0727555	0.335865	0.00649128	0.931665	-0.833006	7.43444e-47	0.0109859	0.884611	-0.421206	5.28349e-09	0.146195	0.0521777	0.585726	1.09683e-17	0.56202	3.97866e-16	-0.497405	1.8823e-12	1.60124	1.4377	1.20288	1.65979	1.60536	1.17209	1.67831	1.27856	1.62391	1.47436	1.84457	1.29618	1.69542	1.63849	1.18856	1.78831	1.79486	1.55159	1.71887	1.78811	1.43958	1.65915	1.59448	1.15361	1.85709	1.39307	1.26977
ENSMUSG00000108297	Gm44167	predicted gene, 44167 [Source:MGI Symbol;Acc:MGI:5690559]	1877	blue	0.0826591	0.274048	0.0977686	0.195453	-0.58105	2.27934e-17	0.418985	6.47425e-09	-0.0202059	0.789512	0.202661	0.0068252	0.270839	0.000266216	0.601233	8.89638e-19	-0.607537	3.08037e-19	1.58729	0.493474	0.366311	1.59335	0	0	1.92685	0	0	0	0	0	1.27599	0	0	0	0	0	0.950849	0.524415	0.380209	1.40371	0	0.350892	0.529271	1.17229	1.1833
ENSMUSG00000030310	Slc6a1	solute carrier family 6 (neurotransmitter transporter, GABA), member 1 [Source:MGI Symbol;Acc:MGI:95627]	34897	blue	0.0709751	0.347855	0.0410798	0.587207	-0.673506	9.55023e-25	0.216055	0.00387383	-0.272989	0.000236714	0.67637	5.10996e-25	1.44162e-05	0.999848	0.835673	2.05775e-47	-0.851835	5.05844e-51	3.04471	1.91224	2.02799	2.75052	1.87195	2.00872	2.82212	2.03815	1.69212	2.9652	1.81743	1.99992	2.85185	1.87528	2.00218	3.03909	1.96578	2.0329	2.96345	1.93708	2.05185	2.77452	2.0428	2.11019	2.68597	1.97574	1.92055
ENSMUSG00000030317	Timp4	tissue inhibitor of metalloproteinase 4 [Source:MGI Symbol;Acc:MGI:109125]	10313	blue	-0.00462523	0.95128	-0.0377011	0.61834	-0.753598	1.03178e-33	0.384297	1.28682e-07	-0.202208	0.00695323	0.472036	3.29908e-11	0.235728	0.00158544	0.971566	1.99058e-111	-0.927376	1.23321e-76	3.91151	1.3967	1.83908	3.9783	1.84185	1.94896	4.02685	1.91736	1.6373	4.20051	1.90788	2.0162	4.1898	1.9917	1.95244	4.12059	1.46536	1.53728	4.08425	1.92309	2.04549	3.86337	1.98566	2.23526	4.35332	1.61051	1.98159
ENSMUSG00000107994	D830050J10Rik	RIKEN cDNA D830050J10 gene [Source:MGI Symbol;Acc:MGI:2444203]	1812	blue	-0.0409613	0.588286	0.0110028	0.884434	-0.201634	0.00711817	0.406658	1.94831e-08	0.209153	0.00520835	-0.011562	0.878605	0.122929	0.103086	0.36093	8.00585e-07	-0.336853	4.55116e-06	1.62141	0.508388	1.13599	1.62755	0.591935	1.35935	1.1661	1.57332	0.944215	1.13237	1.38992	1.45057	1.30606	1.42996	0.895147	1.50982	0.503544	0.967468	1.77239	0.540102	1.16953	1.64665	0	1.58332	1.72049	0	0.410488
ENSMUSG00000030322	Mbd4	methyl-CpG binding domain protein 4 [Source:MGI Symbol;Acc:MGI:1333850]	12674	blue	0.0378747	0.616723	0.0211963	0.779453	-0.451033	2.97534e-10	0.143743	0.0562941	-0.106023	0.160168	0.216007	0.00388202	0.179478	0.0168335	0.364367	6.17354e-07	-0.392634	6.47022e-08	1.47585	1.39549	1.01963	1.60016	1.06202	1.05274	1.3116	1.14449	1.3331	1.34142	0.946216	1.18919	1.56807	1.24655	0.987978	1.33285	1.17253	1.09645	1.20957	1.2408	0.851049	1.26394	1.03131	1.23002	1.2096	1.36636	0.956895
ENSMUSG00000024104	Washc2	WASH complex subunit 2 [Source:MGI Symbol;Acc:MGI:106463]	54648	blue	0.0383678	0.612141	-0.0432611	0.567497	-0.791112	3.3171e-39	0.25793	0.000528161	-0.322979	1.16198e-05	0.582823	1.72973e-17	0.189924	0.0113428	0.94702	3.03871e-88	-0.919907	4.64808e-73	1.62435	0.729763	0.851342	1.59618	0.840386	0.974978	1.77399	0.851924	0.782489	1.77867	0.603554	0.859274	1.63212	0.806606	0.998422	1.87386	0.883489	0.924155	1.71162	0.759223	0.88694	1.6865	0.772026	0.931996	1.83698	0.69989	0.995025
ENSMUSG00000107556	Gm44237	predicted gene, 44237 [Source:MGI Symbol;Acc:MGI:5690629]	935	blue	-0.0118482	0.875624	0.0121249	0.872743	-0.207555	0.00557081	0.344582	2.6462e-06	0.146032	0.0524444	0.199745	0.00768684	-0.00427842	0.954929	0.362478	7.12416e-07	-0.381948	1.55649e-07	2.00666	0	0	2.55093	0	0.684236	0.85091	0	0	2.15886	1.6294	1.0838	1.53736	0	1.07782	0.922367	0	0.693482	0.953453	0	0	1.79824	0	0	0.91817	0	1.18631
ENSMUSG00000030137	Tuba8	tubulin, alpha 8 [Source:MGI Symbol;Acc:MGI:1858225]	16158	blue	0.0166366	0.82604	-0.0935898	0.215334	-0.810879	1.41129e-42	0.238263	0.00140539	-0.326664	9.09907e-06	0.411883	1.22801e-08	0.404206	2.41295e-08	0.880662	1.13413e-58	-0.826142	1.83201e-45	1.1523	0.191724	0.304564	1.1189	0.483574	0.434199	0.802445	0.396755	0.27175	1.00195	0.313042	0.090565	1.31401	0.250977	0.292759	0.911232	0.459147	0.280105	0.624725	0.267457	0.433252	0.895562	0.526959	0.253283	1.31791	0.368793	0.102752
ENSMUSG00000008153	Clstn3	calsyntenin 3 [Source:MGI Symbol;Acc:MGI:2178323]	34213	blue	-0.022488	0.766389	-0.125884	0.0950075	-0.873502	1.34037e-56	0.0886094	0.240865	-0.405382	2.17803e-08	0.170103	0.0236009	0.655697	4.00931e-23	0.7139	6.96456e-29	-0.626371	1.12084e-20	2.60574	2.03916	1.76995	2.63277	2.15019	1.952	2.62834	1.94127	2.14605	2.51197	2.57282	1.77926	2.81918	2.13098	1.77123	2.66855	2.06542	1.91954	2.57035	2.24842	1.99193	2.57678	2.23825	1.89496	3.02655	2.05793	1.77527
ENSMUSG00000038451	Spsb2	splA/ryanodine receptor domain and SOCS box containing 2 [Source:MGI Symbol;Acc:MGI:1315199]	1958	blue	0.0267404	0.723863	-0.0667186	0.377599	-0.442595	6.90768e-10	0.340358	3.56526e-06	0.00148511	0.984348	0.143258	0.05714	0.246596	0.000937133	0.563934	3.00895e-16	-0.512029	3.23491e-13	1.28772	1.11961	0.636163	1.89051	0.555268	0.659538	0.468594	0.334821	0.513608	1.07264	0	0	1.89751	1.03236	0.844536	0.513484	0.826268	0.668522	1.88097	1.17674	1.29	1.91112	1.02824	0.611566	1.64354	0	0.686331
ENSMUSG00000030337	Vamp1	vesicle-associated membrane protein 1 [Source:MGI Symbol;Acc:MGI:1313276]	30413	blue	-0.0293109	0.698551	-0.063685	0.399717	-0.754568	7.65865e-34	0.28681	0.000108675	-0.264934	0.000365747	0.475692	2.21506e-11	0.228787	0.00219145	0.905261	5.81841e-67	-0.86515	2.46209e-54	2.07623	1.14285	1.20306	2.37397	0.88459	1.04504	2.18832	1.01854	0.973467	2.05687	1.15255	1.11789	2.03568	0.880693	0.993046	2.28707	1.13391	1.1835	1.82115	1.18366	1.55356	2.13005	1.05019	1.20697	2.29616	0.729167	1.22247
ENSMUSG00000030339	Ltbr	lymphotoxin B receptor [Source:MGI Symbol;Acc:MGI:104875]	7314	blue	-0.0606004	0.422981	-0.0706016	0.350405	-0.15289	0.0421925	0.137671	0.067651	-0.0798387	0.29081	0.211161	0.00478306	0.0095644	0.899457	0.441213	7.91214e-10	-0.344214	2.71633e-06	1.02077	0.957512	1.177	0.950062	0.910507	1.26087	1.34541	1.42133	0.652947	1.61706	0.953708	1.19418	1.49784	1.34436	1.35731	1.10059	0.786066	1.27511	1.48326	0.837911	0.826861	1.42731	1.25788	1.18392	1.43621	0.716749	0.984403
ENSMUSG00000047976	Kcna1	potassium voltage-gated channel, shaker-related subfamily, member 1 [Source:MGI Symbol;Acc:MGI:96654]	5987	blue	0.13437	0.074568	-0.0803241	0.287878	-0.38354	1.36843e-07	0.424739	3.81219e-09	0.14181	0.0597241	-0.0893193	0.237102	0.235315	0.00161673	0.395822	4.94906e-08	-0.352635	1.48077e-06	5.15258	4.52306	4.77934	4.91753	4.64983	4.29098	4.9245	4.49367	4.82122	4.3691	5.13633	4.8741	4.68159	4.79895	4.61511	4.85607	4.70912	4.6383	4.73306	5.08673	4.77478	4.91422	4.61223	4.58271	4.8405	4.83357	4.68394
ENSMUSG00000000399	Ndufa9	NADH:ubiquinone oxidoreductase subunit A9 [Source:MGI Symbol;Acc:MGI:1913358]	27415	blue	-0.104759	0.165237	-0.083275	0.270476	-0.514774	2.30222e-13	-0.1659	0.0273259	-0.482883	9.97902e-12	0.551962	1.6772e-15	0.151417	0.0442391	0.556458	8.86847e-16	-0.527169	4.77073e-14	1.51251	1.27742	1.25418	1.42502	1.09758	1.26747	1.51792	1.22853	1.20992	1.53164	1.09935	1.17638	1.33624	0.835064	1.27543	1.66347	1.33251	1.23091	1.46294	1.21446	1.06638	1.28492	1.02815	1.32663	1.57161	0.557872	1.35969
ENSMUSG00000030357	Fkbp4	FK506 binding protein 4 [Source:MGI Symbol;Acc:MGI:95543]	8942	blue	0.0112711	0.881637	-0.0593674	0.432496	-0.648261	1.77334e-22	0.114033	0.130712	-0.395323	5.16193e-08	0.608583	2.57739e-19	0.0786544	0.298048	0.855834	5.55026e-52	-0.812776	6.38635e-43	3.38801	2.87478	3.12196	3.62638	2.92195	3.07453	3.58593	2.98569	2.57594	3.27753	2.36732	3.2812	3.6018	2.62064	3.28829	3.87446	2.95815	2.8727	3.67251	3.14096	3.11413	3.66215	2.81393	3.07007	4.03123	2.45253	3.09366
ENSMUSG00000030188	Magohb	mago homolog B, exon junction complex core component [Source:MGI Symbol;Acc:MGI:1913691]	8856	blue	0.0196421	0.795253	0.0198129	0.793513	-0.515659	2.06189e-13	0.221242	0.00308304	-0.185365	0.0135078	0.554725	1.13502e-15	-0.00268585	0.971697	0.699913	2.25766e-27	-0.715521	4.59148e-29	1.87016	0.602771	0.845132	0.956595	0.951672	0.656846	0.951076	1.10774	0.812575	1.37046	0.996233	0.722581	1.2052	0.429411	0.66576	1.57765	0.513303	0.935273	1.57409	0.550442	0.872482	1.50147	0.85153	0.765799	1.37678	0.614882	0.683553
ENSMUSG00000030189	Ybx3	Y box protein 3 [Source:MGI Symbol;Acc:MGI:2137670]	23621	blue	0.0713178	0.345527	-0.0189648	0.802166	-0.564459	2.78615e-16	0.363851	6.42057e-07	-0.100481	0.183285	0.519304	1.30477e-13	-0.00366831	0.961351	0.810468	1.6738e-42	-0.812391	7.50912e-43	1.69169	1.00334	1.02404	1.44965	0.765905	1.1382	1.44243	0.883211	0.773087	1.63387	0.803996	1.07584	1.60096	1.02845	1.0998	1.57745	1.01816	0.965527	1.60352	1.12718	1.07189	1.43304	1.30151	1.22323	1.63834	1.10142	1.16168
ENSMUSG00000107838	Gm45769	predicted gene 45769 [Source:MGI Symbol;Acc:MGI:5804884]	1827	blue	0.00258363	0.972774	-0.00715554	0.924692	-0.54885	2.59266e-15	0.282588	0.000138452	-0.12675	0.092737	0.257431	0.000541942	0.25836	0.000516507	0.63204	3.953e-21	-0.59075	4.93314e-18	2.03194	1.81309	0.672585	1.61951	0	1.3521	2.46572	0.641456	0.544265	1.98403	1.05072	0.894889	2.29126	1.42249	0.360922	1.24759	1.16529	0.706383	1.76399	0.536398	1.66379	0.883951	1.08002	0	0.541345	0.717212	0.407552
ENSMUSG00000100876	2810454H06Rik	RIKEN cDNA 2810454H06 gene [Source:MGI Symbol;Acc:MGI:1920063]	3147	blue	-0.0955892	0.205649	0.0439732	0.561131	-0.311303	2.46972e-05	0.199054	0.00790471	-0.0524671	0.487957	0.254773	0.000621252	0.0695157	0.357883	0.429197	2.51174e-09	-0.424059	4.06069e-09	1.13472	0.571913	0.60142	0	0	0	0.308906	0.217264	0.615518	0	0	0.873112	0.885912	0.406212	0.580204	0.615375	0	0.63237	1.07927	0	0.443278	0.316616	0.404235	0	0.612291	0	0.250369
ENSMUSG00000003031	Cdkn1b	cyclin-dependent kinase inhibitor 1B [Source:MGI Symbol;Acc:MGI:104565]	5112	blue	0.0230293	0.760934	-0.0418964	0.579792	-0.715007	5.24067e-29	0.289603	9.23995e-05	-0.2878	0.000102621	0.628841	7.13566e-21	0.0905773	0.230535	0.968947	3.96371e-108	-0.945571	3.02621e-87	4.67108	2.77401	3.19727	4.30857	2.54961	3.07667	4.32973	3.26372	2.64181	4.36807	2.87164	3.24767	4.61411	2.63346	2.96466	4.56047	2.96542	2.97928	4.39512	2.8311	3.18304	4.80174	3.25708	3.29217	4.82471	2.54434	3.41727
ENSMUSG00000030204	Ddx47	DEAD box helicase 47 [Source:MGI Symbol;Acc:MGI:1915005]	12164	blue	-0.00662041	0.930309	-0.0617687	0.414079	-0.497978	1.7595e-12	-0.112173	0.137151	-0.407036	1.88476e-08	0.259973	0.00047497	0.285441	0.000117604	0.435943	1.32046e-09	-0.369005	4.32612e-07	2.00586	1.21509	1.47722	1.87865	1.41274	1.67463	1.79531	1.44571	1.61587	1.64667	1.55156	1.6362	1.57257	1.74664	1.48187	1.64763	1.58067	1.53487	1.55758	1.53304	1.49294	1.56958	1.62836	1.64359	1.90133	1.59992	1.30502
ENSMUSG00000030218	Mgp	matrix Gla protein [Source:MGI Symbol;Acc:MGI:96976]	3388	blue	-0.039013	0.606166	0.0166537	0.825865	-0.395437	5.11251e-08	0.272292	0.000245926	-0.135138	0.0729109	0.631375	4.47248e-21	-0.190114	0.0112597	0.766414	1.79165e-35	-0.788336	9.22697e-39	3.66248	2.20636	2.85707	4.03778	2.08937	3.61127	3.56893	3.37293	2.62987	4.21213	2.33483	3.17529	4.47675	2.00744	3.35006	3.86673	2.66936	2.29793	4.2934	2.91782	3.22537	3.96244	2.86949	3.91019	3.4682	2.71293	3.18546
ENSMUSG00000008540	Mgst1	microsomal glutathione S-transferase 1 [Source:MGI Symbol;Acc:MGI:1913850]	16439	blue	0.0408521	0.589282	0.0839487	0.266606	-0.551943	1.68173e-15	0.0789473	0.296247	-0.305545	3.5411e-05	0.52179	9.52009e-14	0.0858036	0.256145	0.606844	3.46526e-19	-0.627808	8.62402e-21	1.02155	0.682895	0.515058	0.94218	0.355658	0.601922	1.15971	0.69801	0.327297	0.784712	0.82708	0.531826	0.899739	1.24465	0.678273	0.641631	0.243866	0.357076	1.2858	1.03637	0.567547	1.08916	1.51462	0.675677	0.325412	1.05214	0.557414
ENSMUSG00000030246	Ldhb	lactate dehydrogenase B [Source:MGI Symbol;Acc:MGI:96763]	17708	blue	0.0856651	0.256916	0.0633131	0.402481	-0.703954	8.43981e-28	-0.235805	0.0015797	-0.530228	3.203e-14	0.289239	9.43812e-05	0.475411	2.28424e-11	0.396041	4.85818e-08	-0.360708	8.14074e-07	3.21533	2.63939	2.78937	3.08487	2.98251	2.76546	3.12479	2.71689	3.06626	3.06704	2.97352	2.82558	3.13516	2.83312	2.79161	3.37941	3.05463	2.87225	3.21068	3.14607	2.92297	3.24861	2.75427	2.76724	3.12174	2.89629	2.63698
ENSMUSG00000030247	Kcnj8	potassium inwardly-rectifying channel, subfamily J, member 8 [Source:MGI Symbol;Acc:MGI:1100508]	6777	blue	-0.00117996	0.987564	0.0170949	0.821327	-0.545733	3.99226e-15	0.226189	0.00246784	-0.171807	0.0222203	0.341065	3.39285e-06	0.180393	0.0162736	0.654448	5.16144e-23	-0.663682	7.74559e-24	0.637167	0.154396	0.400791	0	0	0.323284	0.28895	0.202817	0.168059	1.18589	0.51936	0.107332	0.940167	0	0.106522	0.99138	0	0.511724	0	0.448081	0.115718	0.846157	0	0	1.15543	0.604874	0.338005
ENSMUSG00000030256	Bhlhe41	basic helix-loop-helix family, member e41 [Source:MGI Symbol;Acc:MGI:1930704]	7315	blue	-0.0380402	0.615183	-0.0295838	0.695883	-0.168032	0.0253778	0.308805	2.89034e-05	0.0490076	0.517132	0.218944	0.00341332	-0.129333	0.0862205	0.48773	5.76884e-12	-0.44132	7.82984e-10	3.48027	2.73357	2.86877	3.33788	2.73433	3.01054	3.15534	2.88025	2.84415	3.44534	2.94314	3.05285	3.1933	2.81064	3.0304	3.43839	2.44601	2.70535	2.85291	2.65226	2.53532	3.10459	2.86009	3.06142	3.06902	2.89411	3.14191
ENSMUSG00000030304	Ergic2	ERGIC and golgi 2 [Source:MGI Symbol;Acc:MGI:1914706]	33295	blue	-0.0753424	0.318919	0.0622549	0.410406	-0.309783	2.71806e-05	0.157731	0.0360157	-0.0710599	0.347279	0.22246	0.0029199	0.172627	0.0215814	0.365673	5.58828e-07	-0.362166	7.29397e-07	1.43046	1.27826	1.3948	1.28278	1.12901	1.42607	1.39226	1.45201	1.41127	1.26	1.38791	1.49753	1.38013	1.1367	1.51405	1.41101	1.48327	1.38508	1.33648	1.42245	1.38675	1.47822	1.5183	1.36053	1.20115	1.37308	1.40487
ENSMUSG00000063171	Rps4l	ribosomal protein S4-like [Source:MGI Symbol;Acc:MGI:1913434]	1333	blue	-0.0295689	0.696029	-0.00336259	0.96457	-0.210378	0.00494507	0.224215	0.00269847	-0.106385	0.158734	0.673813	8.93475e-25	-0.386236	1.09853e-07	0.669228	2.39974e-24	-0.689309	2.76719e-26	4.16495	2.48392	3.2551	4.12738	1.91004	3.73814	3.96864	3.85095	2.4321	4.17121	2.78129	3.26881	4.08871	2.27463	4.11791	3.82645	3.16173	3.45376	4.41707	2.03076	3.53787	3.95272	2.0193	3.30998	4.1065	2.65443	3.9786
ENSMUSG00000032712	Resf1	retroelement silencing factor 1 [Source:MGI Symbol;Acc:MGI:1914496]	26249	blue	0.0413811	0.584466	-0.071011	0.347612	-0.388137	9.39694e-08	0.473577	2.79064e-11	0.10689	0.156755	0.0971949	0.198101	0.153702	0.0410986	0.565892	2.25676e-16	-0.560051	5.29328e-16	1.34547	1.17249	1.17686	1.33869	1.32524	1.17232	1.29861	1.38807	1.12446	1.21211	1.33854	1.22404	1.29696	1.14316	1.25393	1.16584	1.20008	1.21354	1.60164	1.17237	0.978398	1.37227	1.16393	1.18892	1.31587	1.11465	1.24076
ENSMUSG00000069806	Cacng7	calcium channel, voltage-dependent, gamma subunit 7 [Source:MGI Symbol;Acc:MGI:1932374]	35266	blue	-0.0876729	0.245892	-0.145977	0.0525336	-0.840701	1.71329e-48	-0.168033	0.0253773	-0.631472	4.39281e-21	0.408964	1.59079e-08	0.522556	8.63461e-14	0.716134	3.91878e-29	-0.647447	2.08143e-22	1.95645	1.17567	1.05445	1.86455	1.67327	1.08831	1.99383	1.23192	1.41246	1.78668	1.67481	1.08949	1.81648	1.18705	1.16154	2.19659	1.39565	1.16582	2.06286	1.50748	1.36332	1.89355	1.68798	1.25836	2.06505	1.45149	0.998387
ENSMUSG00000078813	Leng1	leukocyte receptor cluster (LRC) member 1 [Source:MGI Symbol;Acc:MGI:1917007]	5742	blue	-0.150116	0.0461167	-0.0790158	0.295827	-0.319161	1.492e-05	0.0962053	0.202728	-0.145534	0.0532619	0.187457	0.012473	0.149896	0.0464398	0.393107	6.21907e-08	-0.341479	3.29558e-06	0.727145	0.847912	0.887833	0.943583	1.37894	0.84039	1.74652	1.33015	0.6629	0.809357	0.423256	0.629411	1.34998	0	0.785372	0.906615	1.12849	1.14142	0.817605	0.653673	0.479509	1.14437	1.04504	0.992838	1.29206	0.863652	0.788314
ENSMUSG00000035585	Tsen34	tRNA splicing endonuclease subunit 34 [Source:MGI Symbol;Acc:MGI:1913328]	8161	blue	-0.033694	0.656161	-0.108676	0.149905	-0.702812	1.11648e-27	0.19332	0.00993471	-0.271965	0.000250362	0.125216	0.0967868	0.557065	8.13196e-16	0.724402	4.44254e-30	-0.622801	2.13701e-20	3.08627	2.27673	2.25985	2.90617	2.77752	2.42765	3.09591	2.39554	2.73177	3.13893	2.92542	2.13725	3.01515	2.81133	2.28738	2.8179	2.345	2.11216	3.01461	2.24193	2.26733	2.79947	2.725	2.70258	3.57373	2.52549	2.50513
ENSMUSG00000006333	Rps9	ribosomal protein S9 [Source:MGI Symbol;Acc:MGI:1924096]	2904	blue	-0.171881	0.0221623	-0.193108	0.0100177	-0.268407	0.000303688	0.217453	0.00364447	0.0221531	0.76977	-0.140375	0.0623809	0.469122	4.51651e-11	0.354609	1.28117e-06	-0.246496	0.0009418	5.89811	5.80974	5.67968	5.91174	5.84941	5.75877	6.11498	5.83755	5.80912	5.97136	6.03081	5.72544	5.76276	5.73219	5.64383	6.05375	5.62867	5.45688	6.01395	5.99772	5.57817	5.80178	6.06359	5.97985	6.04498	5.73514	5.85518
ENSMUSG00000030428	Ttyh1	tweety family member 1 [Source:MGI Symbol;Acc:MGI:1889007]	17300	blue	-0.126205	0.0941593	-0.00111127	0.988288	-0.391829	6.91973e-08	0.10176	0.177742	-0.201298	0.00721663	0.595808	2.17568e-18	-0.181417	0.0156669	0.556149	9.26909e-16	-0.589766	5.77478e-18	4.21449	3.61863	3.91469	4.24739	3.77032	3.76842	4.42047	3.86788	3.93331	4.3736	3.74932	4.06199	4.34569	3.74025	3.91443	4.38443	3.92775	3.99189	4.31319	3.78592	3.84604	4.12702	3.96245	3.79762	4.02177	3.55407	3.81762
ENSMUSG00000051811	Cox6b2	cytochrome c oxidase subunit 6B2 [Source:MGI Symbol;Acc:MGI:3044182]	1302	blue	0.0356473	0.637608	0.0197461	0.794194	-0.337463	4.36284e-06	0.252802	0.000686812	-0.100786	0.181951	0.498654	1.6248e-12	-0.163749	0.0294192	0.674984	6.92114e-25	-0.678445	3.23363e-25	1.2899	0.667157	1.17	2.64045	1.64057	2.01812	1.95813	1.36252	1.19291	3.08172	1.32403	2.20729	2.96932	0	2.88397	2.89313	0.661115	1.47137	2.94958	1.53397	0.902568	2.66413	0.833208	2.3131	2.88544	1.48921	1.71822
ENSMUSG00000086784	Isoc2a	isochorismatase domain containing 2a [Source:MGI Symbol;Acc:MGI:3609243]	19820	blue	-0.0180453	0.811574	-0.200577	0.00743164	-0.483582	9.22611e-12	0.117405	0.119638	-0.213889	0.00425509	-0.00141692	0.985067	0.471717	3.41489e-11	0.544231	4.90772e-15	-0.424051	4.06368e-09	1.12872	0.694176	0.949135	1.44337	1.04729	1.21219	1.14611	1.02307	1.25945	0.904533	1.06111	1.16427	1.33677	1.1959	0.977804	1.38118	0.994834	0.714168	1.32313	1.16696	0.824566	1.39865	1.3156	1.17099	1.3757	1.31272	0.950695
ENSMUSG00000109165	Gm45148	predicted gene 45148 [Source:MGI Symbol;Acc:MGI:5753724]	3586	blue	-0.121791	0.106341	0.0266617	0.724643	-0.250366	0.000776628	0.242285	0.00115768	0.00645534	0.932043	0.146265	0.0520646	0.0732574	0.332533	0.380386	1.76514e-07	-0.388205	9.34487e-08	0.336106	0	0.20326	0.50833	0	0	0.703644	0.192358	0	0	0.348198	0.196558	0.802506	0.651482	0	0	0	0.56829	0.573723	0	0.395783	0.516748	0	0.365411	0.30098	0	0
ENSMUSG00000109131	Gm44862	predicted gene 44862 [Source:MGI Symbol;Acc:MGI:5753438]	1054	blue	-0.00876183	0.907855	-0.00722562	0.923957	-0.458844	1.33616e-10	0.39009	7.9967e-08	0.0178872	0.813195	0.21843	0.00349145	0.140364	0.0624022	0.558572	6.55121e-16	-0.571635	9.59949e-17	1.47775	0.787666	0	0	0	1.05427	2.19047	0.570722	0	1.01776	0.947642	0	2.38393	0	0	0	0	0.62994	0	0	0.620095	1.97486	0.974939	0	0.839367	0	0
ENSMUSG00000109416	Gm44863	predicted gene 44863 [Source:MGI Symbol;Acc:MGI:5753439]	1421	blue	0.0300158	0.691667	0.143075	0.0574603	-0.509271	4.53823e-13	0.561843	4.08193e-16	0.136042	0.0709974	0.228466	0.00222402	0.178934	0.0171741	0.702851	1.10576e-27	-0.718071	2.36962e-29	1.21667	0	0	0.616342	0	0	2.06098	0	0	2.01451	0	0	2.9792	0.78258	0	1.74682	0	1.14945	2.23181	0	0.845257	2.5586	0	0.447536	2.34992	0	0.505585
ENSMUSG00000062116	Zfp954	zinc finger protein 954 [Source:MGI Symbol;Acc:MGI:1917764]	6798	blue	-0.130084	0.0843955	-0.143272	0.0571152	-0.476701	1.98295e-11	-0.0292975	0.698683	-0.298507	5.44543e-05	0.0587576	0.437246	0.536334	1.42872e-14	0.428578	2.66264e-09	-0.343756	2.80612e-06	1.62098	0.536476	1.23682	0.919366	1.14855	1.37065	1.2181	1.32468	0.989369	1.61614	1.36957	1.00068	1.5669	1.14036	1.20081	1.79185	1.00146	1.01339	2.24349	1.29419	1.32112	1.43514	1.4836	1.09788	1.5646	1.02749	1.26525
ENSMUSG00000066838	Zfp772	zinc finger protein 772 [Source:MGI Symbol;Acc:MGI:2385265]	7881	blue	-0.0170499	0.82179	0.042427	0.574997	-0.116007	0.124139	0.148482	0.048567	-0.0306943	0.685063	0.198702	0.00801786	-0.0430618	0.569284	0.370925	3.72777e-07	-0.319952	1.41709e-05	0.779243	1.04855	0.632961	1.10649	0.662801	1.05655	0.562394	1.27964	0.802132	0.630603	0.803423	0.676027	0.839998	1.28003	0.840556	0.801955	1.34288	1.06925	1.3536	1.0314	1.0039	0.912227	1.02366	1.40025	1.36924	0.376945	1.09432
ENSMUSG00000109724	Gm18194	predicted gene, 18194 [Source:MGI Symbol;Acc:MGI:5010379]	3441	blue	-0.00390658	0.958843	0.0787519	0.297448	-0.274294	0.000220316	0.235478	0.00160429	0.0020597	0.978294	0.369578	4.1384e-07	-0.102966	0.172632	0.416169	8.36006e-09	-0.458372	1.40326e-10	1.06599	0.530997	0.211228	0.287001	0	0.579843	1.06477	0.673159	0.57206	0.393851	0.361176	0.542341	1.02431	0	0.380554	1.29837	0.286826	0.223673	1.47575	0.309306	0.578637	1.59452	0	0	0.569018	0	0.604032
ENSMUSG00000041560	Nop53	NOP53 ribosome biogenesis factor [Source:MGI Symbol;Acc:MGI:2154441]	9891	blue	0.0798144	0.290957	-0.0389841	0.606434	0.0434212	0.566063	0.40775	1.77023e-08	0.279121	0.000168421	-0.0265235	0.726014	-0.194657	0.00942403	0.320573	1.36084e-05	-0.268082	0.00030905	3.47015	3.04876	3.37572	3.5509	3.36359	3.47202	3.1038	3.45683	3.31801	3.37731	3.33697	3.36648	3.6347	3.50422	3.34883	3.34192	3.17546	3.42535	3.50561	2.78788	3.39214	3.39586	3.34445	3.37927	3.81109	3.06613	3.4919
ENSMUSG00000002083	Bbc3	BCL2 binding component 3 [Source:MGI Symbol;Acc:MGI:2181667]	9812	blue	-0.031777	0.674575	0.0146877	0.84615	-0.148184	0.0490246	-0.00309395	0.967399	-0.230072	0.00206543	0.529698	3.43304e-14	-0.291534	8.25071e-05	0.455754	1.83847e-10	-0.451933	2.71591e-10	1.22793	1.74006	1.60687	1.34696	1.47502	1.72819	1.72133	1.85054	1.24203	1.90767	1.26103	1.6962	2.18124	1.35869	1.80222	1.96364	1.002	1.97842	1.5672	1.2783	1.41834	1.99673	1.02659	1.63549	1.68003	1.05604	1.80408
ENSMUSG00000048481	Mypop	Myb-related transcription factor, partner of profilin [Source:MGI Symbol;Acc:MGI:2446472]	10521	blue	-0.183022	0.0147555	-0.0301306	0.690548	-0.42773	2.88345e-09	-0.260268	0.000467713	-0.539914	8.83245e-15	0.513205	2.79715e-13	0.033072	0.662114	0.508457	5.01252e-13	-0.473544	2.80084e-11	2.13681	2.23595	2.03355	2.4112	1.82113	2.23916	2.58481	2.02244	2.14469	2.59227	2.54549	2.03015	2.31427	1.77898	2.53305	2.71569	2.15478	2.10129	2.22094	2.0455	2.06139	2.35351	1.89081	2.31586	2.44038	1.74351	2.00157
ENSMUSG00000044030	Irf2bp1	interferon regulatory factor 2 binding protein 1 [Source:MGI Symbol;Acc:MGI:2442159]	2733	blue	-0.062814	0.406208	-0.0762611	0.313037	-0.514385	2.41642e-13	-0.0587343	0.437428	-0.400373	3.35933e-08	0.384124	1.30501e-07	0.219537	0.00332525	0.58149	2.12887e-17	-0.500282	1.33988e-12	4.48169	3.79539	3.7974	4.46343	4.23458	3.87798	4.39714	4.11118	3.513	4.40298	3.83311	4.01166	4.13738	3.77945	4.0515	4.50748	3.65892	3.98005	4.40495	3.60158	4.20128	4.54374	4.18024	3.92439	4.22144	3.50237	3.9245
ENSMUSG00000050605	Zfp61	zinc finger protein 61 [Source:MGI Symbol;Acc:MGI:99663]	10193	blue	-0.0291759	0.699873	0.0300371	0.691459	-0.488345	5.378e-12	0.214517	0.00414116	-0.145749	0.0529084	0.265623	0.000352581	0.203179	0.0066813	0.573528	7.21679e-17	-0.582276	1.88379e-17	0.797731	0.609474	0.615679	0.801596	0.857254	0.875774	0.600291	0.537652	0.578071	0.709994	0.741777	0.737735	0.836228	0.264004	0.594057	0.655195	0.455506	0.795751	1.19445	0.403684	0.414843	1.09525	1.13627	0.438219	0.985034	0.85441	0.495255
ENSMUSG00000003380	Rabac1	Rab acceptor 1 (prenylated) [Source:MGI Symbol;Acc:MGI:1201692]	3002	blue	-0.0775444	0.30494	-0.0443127	0.558109	-0.682102	1.43027e-25	-0.0431692	0.568321	-0.487358	6.01868e-12	0.743637	2.036e-32	0.1081	0.152091	0.787163	1.41515e-38	-0.786092	2.08607e-38	5.54701	4.50301	4.70717	5.49667	4.63705	4.67645	5.41955	4.64519	4.85252	5.91568	4.53437	4.6373	5.56139	4.44596	4.70508	5.45743	4.47105	4.506	5.41652	4.50158	4.37822	5.56397	4.36894	4.55785	5.44874	4.36435	4.53919
ENSMUSG00000045252	Zfp574	zinc finger protein 574 [Source:MGI Symbol;Acc:MGI:2442951]	10925	blue	0.137617	0.0677602	-0.118347	0.11668	-0.249553	0.000808948	0.126283	0.0939554	-0.0962432	0.20255	0.115666	0.125255	0.106216	0.159401	0.367688	4.78849e-07	-0.291441	8.2961e-05	1.39842	0.88035	1.28699	1.2962	1.37771	1.38407	1.16222	1.14876	0.820797	1.0618	1.33524	1.16714	1.20331	1.42555	1.22094	1.84998	1.44993	1.36995	1.38017	1.14077	0.950465	1.76701	1.36938	1.21698	1.24526	1.05448	1.13814
ENSMUSG00000005447	Pafah1b3	platelet-activating factor acetylhydrolase, isoform 1b, subunit 3 [Source:MGI Symbol;Acc:MGI:108414]	2937	blue	-0.101025	0.180914	-0.045869	0.544354	-0.577798	3.765e-17	-0.137333	0.0683346	-0.415547	8.84274e-09	0.247276	0.000906095	0.397516	4.28725e-08	0.430672	2.18493e-09	-0.393514	6.01035e-08	2.07148	2.04533	1.98393	1.73155	1.67389	1.64391	2.34864	1.92081	1.83418	2.53129	1.73683	1.4762	1.89751	1.9213	1.72188	2.39915	2.42784	1.66051	2.28563	2.1249	1.7279	2.76234	1.62249	2.11885	2.39195	1.92762	1.59961
ENSMUSG00000043843	Tmem145	transmembrane protein 145 [Source:MGI Symbol;Acc:MGI:3607779]	10089	blue	0.0243773	0.7474	0.0358859	0.635357	-0.812547	7.03186e-43	0.21555	0.00395997	-0.352381	1.50851e-06	0.591111	4.65533e-18	0.199652	0.00771576	0.904734	9.23019e-67	-0.896539	8.7375e-64	2.3247	0.990133	1.22923	2.67919	1.06576	1.16175	2.75163	1.14841	1.16661	2.34148	1.11389	1.35411	2.73172	0.774053	0.825465	2.67643	1.23286	1.50096	2.76871	1.09878	1.26451	2.78538	1.38623	1.18946	2.6501	1.03534	1.27424
ENSMUSG00000057229	Dmac2	distal membrane arm assembly complex 2 [Source:MGI Symbol;Acc:MGI:1913599]	6137	blue	0.0046832	0.95067	-0.0745048	0.324345	-0.3826	1.47663e-07	0.0888068	0.239814	-0.135663	0.0717935	-0.117045	0.120786	0.44035	8.60968e-10	0.3196	1.44999e-05	-0.227756	0.00229755	2.07696	2.38984	1.93697	2.15558	2.10267	1.98499	2.10629	1.73707	2.0957	2.28452	1.89202	1.83133	2.06648	2.22303	1.95498	2.04858	2.15483	2.06937	2.04927	2.24912	1.84086	2.17746	1.86919	1.88553	2.26167	1.9545	2.3726
ENSMUSG00000089661	Mia	MIA SH3 domain containing [Source:MGI Symbol;Acc:MGI:109615]	1415	blue	0.0470228	0.534265	0.0604164	0.424393	0.0706799	0.349869	0.42539	3.58814e-09	0.298624	5.40694e-05	0.077896	0.302746	-0.224434	0.00267204	0.330692	6.93979e-06	-0.314109	2.06628e-05	0	0	0	1.87822	0.722106	1.13946	1.04408	1.48919	0.670579	0	0.758542	0.798929	1.81329	0	1.30337	0.670425	0	0	2.23662	0.661268	0.847966	1.67046	0	1.83056	0.667124	0	0
ENSMUSG00000055200	Sertad3	SERTA domain containing 3 [Source:MGI Symbol;Acc:MGI:2180697]	3596	blue	-0.0683604	0.365947	-0.0340625	0.652644	-0.591628	4.28396e-18	0.146661	0.0514248	-0.301045	4.66858e-05	0.510695	3.81175e-13	0.123039	0.102777	0.768874	7.98941e-36	-0.748005	5.6014e-33	0.8358	1.18729	1.03994	1.42488	0.328386	0.705891	1.97283	1.09617	0.301979	0.926832	0.627066	0.522723	1.44968	0.361316	0.900331	1.83206	0.706125	0.214714	1.67424	0.297256	0.837498	1.92294	0.6471	1.00437	2.00266	1.20713	0.871248
ENSMUSG00000003438	Timm50	translocase of inner mitochondrial membrane 50 [Source:MGI Symbol;Acc:MGI:1913775]	6556	blue	-0.038668	0.609358	0.0119953	0.874093	-0.369274	4.23716e-07	0.0584161	0.439919	-0.175994	0.0191206	0.279196	0.000167714	0.117555	0.119163	0.396478	4.68178e-08	-0.3927	6.43423e-08	1.19628	1.78744	1.26715	1.95906	1.56698	1.14513	1.81618	1.21802	1.10393	1.86237	1.13387	1.28515	1.53578	1.44208	1.65019	1.60539	1.2542	1.31982	2.02571	0.909586	1.44709	1.40555	1.16469	1.7506	1.77015	1.38693	0.933338
ENSMUSG00000044786	Zfp36	zinc finger protein 36 [Source:MGI Symbol;Acc:MGI:99180]	3469	blue	-0.00732576	0.922906	0.142163	0.0590861	-0.281593	0.0001465	0.0937665	0.214465	-0.110685	0.142472	0.34514	2.54327e-06	-0.0264417	0.726825	0.389114	8.66919e-08	-0.402326	2.83949e-08	1.53523	0	0.392647	1.06462	0.613467	0.726184	1.05868	0.668811	0.785823	1.167	0.358594	0.681255	2.11547	0.669055	0.377852	0.974644	0.284725	0.41435	1.59423	0.307057	0.407411	1.07938	0.371134	0.20036	1.13687	0.747041	0.600043
ENSMUSG00000037463	Fbxo27	F-box protein 27 [Source:MGI Symbol;Acc:MGI:2685007]	6489	blue	0.149828	0.0465402	0.109861	0.145485	-0.516925	1.76003e-13	0.0863212	0.253277	-0.215329	0.00399802	0.343387	2.88043e-06	0.181899	0.0153883	0.443226	6.49105e-10	-0.452483	2.56837e-10	1.01067	0.668884	0.503914	0.861567	0.19112	0.336082	0.945885	0.395375	1.19553	0.414575	0.380398	0.403429	1.40321	0.838809	0.310447	0.928236	0.66283	0.616902	0.622708	0.708393	0.231974	1.20738	0.835254	0.483607	0.823094	1.06207	0.451681
ENSMUSG00000099098	1110035H17Rik	RIKEN cDNA 1110035H17 gene [Source:MGI Symbol;Acc:MGI:1915936]	1240	blue	0.0369475	0.625381	0.053093	0.482775	-0.669405	2.3107e-24	0.339282	3.844e-06	-0.153463	0.0414179	0.283544	0.000131107	0.311195	2.4866e-05	0.77371	1.58501e-36	-0.750437	2.69875e-33	3.33689	0	0.523604	1.15157	0	0.937473	2.21282	0.867859	0.74435	0.903856	0	0.508032	2.59007	0	0	2.12933	0	0.55127	1.27041	0.734252	0.935731	2.72364	0.864512	0.502635	2.81514	0	0
ENSMUSG00000030588	Yif1b	Yip1 interacting factor homolog B (S. cerevisiae) [Source:MGI Symbol;Acc:MGI:1924504]	9268	blue	-0.0288219	0.703343	-0.0550228	0.466983	-0.725725	3.11256e-30	0.188647	0.0119162	-0.282148	0.000141954	0.397107	4.43862e-08	0.347274	2.18331e-06	0.766752	1.60465e-35	-0.715832	4.23683e-29	1.39183	0.868654	0.767641	1.44153	0.673609	0.633197	1.5184	0.78025	1.05941	1.26214	0.508401	0.293844	1.54571	0.527767	0.589094	1.48866	0.575295	0.457947	1.38191	0.697274	0.631902	1.45938	0.525298	0.290495	1.69776	0.592453	0.825538
ENSMUSG00000037166	Ppp1r14a	protein phosphatase 1, regulatory inhibitor subunit 14A [Source:MGI Symbol;Acc:MGI:1931139]	4493	blue	-0.189892	0.0113566	-0.0842104	0.265112	-0.454153	2.16622e-10	0.262835	0.000408749	-0.0999999	0.185401	0.339243	3.85458e-06	0.156893	0.0370268	0.634474	2.51037e-21	-0.619091	4.1426e-20	2.0499	1.24062	1.36166	2.01228	1.28217	1.2565	1.58826	1.60837	0.94991	1.86568	1.20614	1.45809	1.83738	0.541572	1.02875	1.85126	0.418898	0.470208	1.65249	1.30159	1.46652	2.40523	0.930571	1.72273	1.68787	1.03386	0.845132
ENSMUSG00000099689	Zfp383	zinc finger protein 383 [Source:MGI Symbol;Acc:MGI:1920979]	8590	blue	0.103831	0.169033	0.0266728	0.724533	-0.636001	1.88432e-21	0.308531	2.94034e-05	-0.164599	0.0285757	0.318151	1.59313e-05	0.244355	0.00104643	0.734995	2.42565e-31	-0.696096	5.635e-27	1.51694	0.919264	0.649338	1.32127	0.806555	0.894297	1.26278	0.777797	0.664322	1.52913	1.01834	0.79177	1.75771	0.874976	1.10344	1.56015	0.769665	1.05301	1.08495	0.896896	1.12828	1.38864	0.774712	0.972813	1.11245	1.06749	1.12452
ENSMUSG00000074218	Cox7a1	cytochrome c oxidase subunit 7A1 [Source:MGI Symbol;Acc:MGI:1316714]	1934	blue	-0.0322116	0.670383	-0.0634234	0.40166	-0.523585	7.5698e-14	0.351084	1.65809e-06	-0.120525	0.110053	0.426544	3.22198e-09	0.101428	0.179171	0.817806	7.46623e-44	-0.775976	7.32632e-37	2.29028	0.841266	1.42396	2.69655	0.96387	1.61055	1.35281	1.51159	0	2.45099	0	1.39168	2.36156	0	1.05247	2.41359	1.564	0.922302	2.58022	1.18669	0.909144	2.06853	1.36661	1.04889	1.65567	0	0.693092
ENSMUSG00000019738	Polr2i	polymerase (RNA) II (DNA directed) polypeptide I [Source:MGI Symbol;Acc:MGI:1917170]	1442	blue	0.0158788	0.833847	-0.0472528	0.532264	-0.514625	2.34542e-13	0.107901	0.152851	-0.211744	0.00466544	0.120744	0.109403	0.413578	1.05548e-08	0.502265	1.05813e-12	-0.420795	5.48657e-09	3.8123	3.98769	3.43062	4.11119	3.64081	3.67858	4.41429	3.89075	3.95567	4.45767	3.79678	3.6571	4.14198	4.22827	3.8763	4.45265	3.7084	3.46003	4.39497	4.08546	3.99229	4.68011	3.77648	3.86984	4.36559	3.4318	3.78881
ENSMUSG00000042831	Alkbh6	alkB homolog 6 [Source:MGI Symbol;Acc:MGI:2142037]	5587	blue	0.0534712	0.479657	0.0707001	0.349732	-0.565863	2.26619e-16	0.0635781	0.40051	-0.314887	1.96599e-05	0.582329	1.86828e-17	0.0371773	0.623231	0.643281	4.69129e-22	-0.662755	9.3991e-24	1.67311	1.15907	0.906111	1.46585	0.990674	0.491835	1.6562	1.131	0.925365	0.975727	0.232912	1.20888	1.95073	0.793028	0.550661	1.82656	1.05918	1.09502	2.04772	0.527874	0.934868	1.41076	0.934157	0.720314	1.62506	1.03771	0.971382
ENSMUSG00000074211	Sdhaf1	succinate dehydrogenase complex assembly factor 1 [Source:MGI Symbol;Acc:MGI:1915582]	2489	blue	-0.0154205	0.838577	0.125712	0.095464	-0.45894	1.32295e-10	0.0149274	0.843671	-0.288337	9.94691e-05	0.328029	8.3048e-06	0.172761	0.021478	0.476988	1.92132e-11	-0.46237	9.24777e-11	3.09751	3.01323	2.36222	3.25096	1.68516	2.92808	3.14553	2.71112	3.01153	2.73149	2.94218	2.78412	3.02632	2.84149	3.01684	2.94969	2.69454	2.90529	3.12757	2.57495	2.92492	2.96831	2.91496	2.97312	3.17335	2.51782	2.5926
ENSMUSG00000036854	Hspb6	heat shock protein, alpha-crystallin-related, B6 [Source:MGI Symbol;Acc:MGI:2685325]	3265	blue	0.0168617	0.823725	-0.165727	0.0274894	-0.147895	0.0494738	0.0665814	0.378583	-0.0819674	0.278097	0.133541	0.0763932	0.0582298	0.441382	0.306431	3.3518e-05	-0.238913	0.00136235	1.84528	1.74182	1.11317	1.11092	1.0882	1.03048	0.941523	1.52598	1.19042	1.40821	0.378297	0.849242	0.861787	0.956314	1.28185	1.3438	1.1104	0.771439	0.851647	0.324236	1.02862	0.960621	1.16787	0.9633	0.81915	0.443994	0.936072
ENSMUSG00000036835	Psenen	presenilin enhancer gamma secretase subunit [Source:MGI Symbol;Acc:MGI:1913590]	1764	blue	-0.043618	0.564303	-0.134345	0.0746231	-0.54171	6.92384e-15	-0.0320838	0.671616	-0.322871	1.17028e-05	0.204025	0.00645242	0.378844	1.99711e-07	0.40704	1.88409e-08	-0.399433	3.64079e-08	1.64767	2.01353	1.3436	2.00196	2.04489	1.83724	2.70875	0.902921	0	2.95148	2.1142	1.47525	2.33169	1.45444	1.6139	3.32418	2.14811	1.71806	1.578	2.09255	1.19117	1.67312	2.48939	2.07822	1.74758	1.58545	1.88937
ENSMUSG00000097750	Gm4673	predicted gene 4673 [Source:MGI Symbol;Acc:MGI:3782854]	4710	blue	0.0670842	0.374985	-0.110484	0.143205	-0.433186	1.72023e-09	0.25498	0.000614705	-0.11635	0.123022	0.5112	3.58234e-13	-0.045943	0.543703	0.686083	5.80687e-26	-0.688923	3.02541e-26	1.13647	0.217263	0.299107	0.567935	0.475401	0.445096	0.712053	0.625703	0.438857	0.939072	0	0.289548	0.462261	0	0.287493	1.04704	0	0.31619	0.639441	0	0.16371	1.48731	0	0.729777	0.913114	0	0.172004
ENSMUSG00000036570	Fxyd1	FXYD domain-containing ion transport regulator 1 [Source:MGI Symbol;Acc:MGI:1889273]	5521	blue	0.00666347	0.929857	-0.00257626	0.972852	-0.466759	5.81426e-11	0.407719	1.77509e-08	-0.0345354	0.648142	0.434489	1.51856e-09	0.0219925	0.771393	0.817145	9.93693e-44	-0.786329	1.91479e-38	3.19836	1.62283	1.78942	2.99931	1.41406	2.41046	3.31941	2.36984	1.57118	3.48196	2.00507	1.90663	3.20423	1.84605	2.41329	3.07533	1.61179	1.23804	3.82413	1.62592	2.02694	2.81044	1.5982	2.80553	3.23846	1.8308	2.38208
ENSMUSG00000036560	Lgi4	leucine-rich repeat LGI family, member 4 [Source:MGI Symbol;Acc:MGI:2180197]	11593	blue	0.0285768	0.705748	-0.0537475	0.477387	-0.712571	9.77916e-29	0.375371	2.63111e-07	-0.135168	0.0728453	0.271377	0.000258531	0.377617	2.20216e-07	0.816485	1.32006e-43	-0.75208	1.64018e-33	1.47783	1.21451	0.643025	1.32342	0.842266	0.752931	1.49305	0.482405	0.843537	1.51772	0.669982	0.82174	1.65458	0.61322	0.662066	1.41177	0.60624	0.884566	1.32804	0.712598	0.620138	1.30193	0.840016	1.01818	1.55457	0.686119	0.825104
ENSMUSG00000019194	Scn1b	sodium channel, voltage-gated, type I, beta [Source:MGI Symbol;Acc:MGI:98247]	10479	blue	0.00744268	0.92168	-0.114391	0.1295	-0.742935	2.49914e-32	0.0246968	0.744204	-0.428679	2.63739e-09	0.34595	2.40039e-06	0.393748	5.89367e-08	0.710502	1.65242e-28	-0.626947	1.00914e-20	3.88126	3.3092	3.34543	3.73974	3.50467	3.27255	3.87027	3.06526	3.42597	3.82716	3.58768	3.12798	3.9317	3.20221	3.22887	3.92772	3.56486	3.38844	4.16694	3.60282	3.20313	4.05521	3.16409	3.22268	4.06337	3.14725	3.28756
ENSMUSG00000108447	Gm44567	predicted gene 44567 [Source:MGI Symbol;Acc:MGI:5753143]	2630	blue	-0.00175724	0.98148	0.18487	0.0137631	-0.468502	4.82707e-11	0.338684	4.00767e-06	-0.025835	0.732852	0.399474	3.62808e-08	0.0312269	0.679897	0.611766	1.49222e-19	-0.657361	2.858e-23	1.0518	0	0.270581	0.656218	0	0	0.362559	0	0	0.865032	0.80272	0	1.23439	0	0	0.398638	0	0.286191	0.736283	0	0	0.911456	0	0	1.53498	0	0
ENSMUSG00000050063	Klk6	kallikrein related-peptidase 6 [Source:MGI Symbol;Acc:MGI:1343166]	7531	blue	-0.0612087	0.418332	-0.0377276	0.618093	-0.772236	2.6061e-36	0.219791	0.00328808	-0.293227	7.46648e-05	0.455099	1.96622e-10	0.292027	8.01481e-05	0.860155	4.72055e-53	-0.833745	5.2209e-47	1.24739	0	0	0.487761	0.315105	0.104796	0.846551	0	0	1.19585	0.176295	0.187771	0.437577	0	0.186393	1.3539	0.138158	0	0.763513	0	0.29332	1.15742	0	0	1.21756	0	0
ENSMUSG00000060601	Nr1h2	nuclear receptor subfamily 1, group H, member 2 [Source:MGI Symbol;Acc:MGI:1352463]	4335	blue	-0.000303082	0.996806	0.0925917	0.220289	-0.437428	1.14401e-09	-0.0221193	0.770112	-0.293673	7.27145e-05	0.491773	3.62805e-12	-0.0423448	0.575739	0.444924	5.48741e-10	-0.475688	2.21613e-11	1.84968	1.0423	1.52474	1.26164	1.18409	1.12301	1.35615	1.20028	1.5516	1.99637	1.0902	1.14236	1.50928	0.772512	1.48386	1.88878	1.54622	1.37708	1.77564	1.0968	1.56481	1.80494	0.955352	0.966269	1.3421	1.66509	1.07081
ENSMUSG00000062785	Kcnc3	potassium voltage gated channel, Shaw-related subfamily, member 3 [Source:MGI Symbol;Acc:MGI:96669]	14090	blue	0.0614533	0.416471	-0.0140457	0.852797	-0.755049	6.60222e-34	0.368699	4.42971e-07	-0.207411	0.0056046	0.49305	3.1298e-12	0.185779	0.0132972	0.942615	2.71396e-85	-0.91165	1.72087e-69	4.18265	2.46187	2.74393	4.22377	2.0692	2.54409	4.48101	2.78254	2.35055	4.20774	2.74346	2.54331	4.50965	2.32044	2.5968	4.5915	2.33019	2.64208	4.29599	2.36346	2.78759	4.43357	2.22763	2.78776	4.65235	2.32431	2.90228
ENSMUSG00000038539	Atf5	activating transcription factor 5 [Source:MGI Symbol;Acc:MGI:2141857]	4402	blue	-0.075794	0.316019	-0.252819	0.000686197	-0.318677	1.53972e-05	0.251818	0.000721873	-0.010105	0.893806	-0.0449421	0.552526	0.301714	4.48184e-05	0.479746	1.41626e-11	-0.386161	1.10523e-07	3.00945	3.68089	3.02655	3.50119	2.81873	2.94536	3.42353	2.76755	2.52483	3.10542	3.05973	2.86827	3.30608	3.26334	2.65737	3.41921	2.49627	2.64239	3.55354	2.84159	2.70677	2.90522	3.45169	3.16732	3.58024	2.72531	3.14698
ENSMUSG00000003184	Irf3	interferon regulatory factor 3 [Source:MGI Symbol;Acc:MGI:1859179]	5200	blue	-0.0446462	0.555147	0.118638	0.115775	-0.325708	9.69833e-06	0.263036	0.000404448	0.00562085	0.94081	0.13873	0.0655449	0.145902	0.0526568	0.391544	7.08655e-08	-0.363575	6.55646e-07	1.0604	1.02182	1.03095	0.662289	0.436722	0.408548	1.45102	0.373041	1.38413	1.29514	0.809806	0.681621	1.13578	0.669416	0.764756	1.19392	1.11397	0.829296	2.2848	1.36864	0.725127	1.55126	1.12053	0.482912	1.18892	0.929845	1.24871
ENSMUSG00000063511	Snrnp70	small nuclear ribonucleoprotein 70 (U1) [Source:MGI Symbol;Acc:MGI:98341]	19289	blue	-0.091017	0.228271	0.0730886	0.333652	-0.510892	3.72068e-13	0.258251	0.000519434	-0.134337	0.0746401	0.442406	7.03705e-10	0.0753978	0.318563	0.580601	2.44399e-17	-0.608353	2.68053e-19	2.84681	2.24198	2.42217	2.76789	2.20839	2.49014	2.93023	2.5293	1.99822	2.64701	2.15407	2.62193	2.98496	2.04626	2.51388	2.7029	1.9648	2.51019	3.06247	2.02545	2.46431	2.9423	2.39879	2.28046	2.57523	2.23906	2.30964
ENSMUSG00000040435	Ppp1r15a	protein phosphatase 1, regulatory subunit 15A [Source:MGI Symbol;Acc:MGI:1927072]	3352	blue	-0.0249391	0.741783	-0.0679564	0.368794	-0.352193	1.52942e-06	0.0321344	0.671128	-0.217875	0.00357775	0.511956	3.26388e-13	-0.0947591	0.209631	0.470765	3.78489e-11	-0.489321	4.81006e-12	1.26501	0.9362	0.571024	2.0577	0	0.745964	1.3613	0.937737	0.999374	1.70293	1.11643	0.95375	1.76053	0	0.695738	2.16863	0.53763	1.24929	2.04779	0	0.744493	1.61992	0.934198	1.0561	1.57793	0.767251	0.918086
ENSMUSG00000059070	Rpl18	ribosomal protein L18 [Source:MGI Symbol;Acc:MGI:98003]	5379	blue	-0.132118	0.0796101	-0.0646512	0.392591	-0.620095	3.46623e-20	-0.0557614	0.461016	-0.402586	2.77642e-08	0.4612	1.04537e-10	0.286199	0.000112579	0.593805	3.01368e-18	-0.577034	4.23265e-17	3.03047	2.09531	1.97272	2.72945	1.90076	2.49604	2.5919	2.4513	2.24359	3.20678	2.03339	2.20175	3.0198	2.42653	2.56653	2.94322	2.34496	2.46095	2.97031	2.40134	2.32144	2.92685	1.86741	2.0603	2.90602	2.48375	1.99769
ENSMUSG00000058975	Kcnc1	potassium voltage gated channel, Shaw-related subfamily, member 1 [Source:MGI Symbol;Acc:MGI:96667]	42207	blue	0.0306139	0.685845	-0.0363561	0.63093	-0.793282	1.47474e-39	0.363424	6.63169e-07	-0.221871	0.00299774	0.400515	3.3185e-08	0.291259	8.38527e-05	0.930999	1.64585e-78	-0.880063	1.71026e-58	3.05887	1.9507	1.95105	3.32308	2.23333	1.9895	3.41748	2.06594	2.08184	3.21192	2.47136	2.08294	3.29411	2.20566	2.03151	3.29647	2.13983	2.12545	3.11704	2.19137	2.37772	3.317	2.19934	2.0478	3.32298	2.10079	2.08744
ENSMUSG00000049516	Spty2d1	SPT2 chromatin protein domain containing 1 [Source:MGI Symbol;Acc:MGI:2142062]	18015	blue	0.0296977	0.694771	-0.0820004	0.277902	-0.150137	0.0460854	0.245527	0.000987915	0.000798768	0.991581	0.0808603	0.284661	-0.00642556	0.932355	0.400043	3.45557e-08	-0.334859	5.22196e-06	1.35988	1.87853	1.844	1.72781	1.55525	1.53096	1.60586	1.43482	1.5617	1.25035	1.42461	1.69474	1.57288	1.68506	1.66085	1.58396	1.39971	1.43174	1.55789	1.61129	1.85104	2.04596	1.51815	1.35004	1.43753	1.65777	1.71557
ENSMUSG00000109203	Gm32849	predicted gene, 32849 [Source:MGI Symbol;Acc:MGI:5592008]	1898	blue	-0.0247071	0.744101	0.145515	0.053293	-0.574905	5.85708e-17	0.431207	2.07696e-09	0.0205815	0.785693	0.193146	0.0100029	0.287471	0.000104596	0.624496	1.57463e-20	-0.63576	1.97184e-21	0.580785	0	0	1.1356	0.569765	0.676176	1.1294	0.344236	0.912472	1.71208	0.600019	0	1.74123	0.622185	0	0.912278	0	0	0.943123	0	0.376507	1.60145	0.619361	0.347442	1.4611	0	0
ENSMUSG00000030500	Slc17a6	solute carrier family 17 (sodium-dependent inorganic phosphate cotransporter), member 6 [Source:MGI Symbol;Acc:MGI:2156052]	49113	blue	-0.0677318	0.370382	-0.0104314	0.890398	-0.314914	1.96262e-05	0.374712	2.77164e-07	-0.00351248	0.962992	0.517564	1.62451e-13	-0.230274	0.00204627	0.704905	6.67884e-28	-0.72477	4.02475e-30	1.22704	0.374225	0.913616	1.58723	0.356967	0.788972	1.20192	0.700306	0.205932	1.18622	0.332395	0.741069	0.801198	0.369305	0.670969	1.12166	0.421191	0.63435	0.439971	0.264277	1.83119	1.19499	0.47893	0.805006	1.23576	0.492895	0.849164
ENSMUSG00000092118	Fancf	Fanconi anemia, complementation group F [Source:MGI Symbol;Acc:MGI:3689889]	1690	blue	-0.0376438	0.618874	0.0507333	0.502467	-0.300677	4.77425e-05	-0.0183276	0.808683	-0.242157	0.0011649	0.375836	2.5363e-07	-0.00433222	0.954363	0.387124	1.02138e-07	-0.387647	9.78388e-08	1.07952	0.930484	0.973141	2.0486	0.626566	1.42154	2.03995	1.14443	1.31399	2.27343	1.10998	1.34969	1.63472	1.77495	1.50779	2.15931	1.48098	1.24235	1.84423	0.572263	1.87938	1.49974	0.680044	1.5033	1.56996	1.92023	0.43605
ENSMUSG00000108325	Gm44898	predicted gene 44898 [Source:MGI Symbol;Acc:MGI:5753474]	2222	blue	0.117844	0.118252	0.0123829	0.870059	-0.538478	1.07182e-14	-0.00550868	0.94199	-0.315176	1.92996e-05	0.383175	1.40951e-07	0.153096	0.0419124	0.465487	6.65561e-11	-0.465559	6.60533e-11	2.38788	2.03583	1.30161	2.0242	1.16414	0.595232	1.75153	1.38477	1.70525	1.77842	0.526605	1.52831	1.37919	1.25202	0.766511	2.25309	1.60584	0.333086	2.30472	1.51169	2.02026	0.761399	1.50184	1.51641	1.99823	1.37215	0.852167
ENSMUSG00000070527	Mkrn3	makorin, ring finger protein, 3 [Source:MGI Symbol;Acc:MGI:2181178]	2546	blue	0.0484504	0.521912	-0.00852901	0.910293	-0.273778	0.000226668	0.225334	0.00256541	-0.0176553	0.815573	0.04949	0.51301	0.142016	0.0593518	0.358297	9.75047e-07	-0.308176	3.00637e-05	0.798272	0.927518	1.04649	0.375706	0	0	0.373097	0.264106	0	0.510192	0.469337	0.269731	1.26151	0	0.267805	0.729033	0	0	0	0.719257	0.289597	0.684075	1.13696	0.266633	1.206	0.548075	0.767859
ENSMUSG00000081788	Gm5898	predicted gene 5898 [Source:MGI Symbol;Acc:MGI:3644921]	2070	blue	0.0301331	0.690523	0.11612	0.12377	-0.433789	1.62395e-09	0.403051	2.66709e-08	0.0819341	0.278293	0.0527934	0.485252	0.26871	0.000298774	0.449242	3.56451e-10	-0.419116	6.39726e-09	0.932783	0.453971	0.608057	0.449829	0	0	1.0628	0	0.85516	0	0.558643	0	1.44297	0	0	0	0.791826	0	0.508945	0	0.348705	1.08356	0	0	0.48736	0.649295	0
ENSMUSG00000108421	Gm44718	predicted gene 44718 [Source:MGI Symbol;Acc:MGI:5753294]	358	blue	0.0256438	0.734755	0.0506913	0.502821	-0.169121	0.0244294	0.225826	0.00250881	0.000370457	0.996095	0.445728	5.06622e-10	-0.268249	0.000306283	0.440379	8.58545e-10	-0.468304	4.9305e-11	3.15113	2.89041	2.01114	4.16386	0	2.06	2.86724	1.28018	0	2.81438	2.69344	3.05489	3.45132	0	3.27853	2.50491	1.63883	3.17944	3.43076	1.72171	3.77056	4.19045	2.74103	1.95878	1.73279	0	2.11497
ENSMUSG00000075701	Selenos	selenoprotein S [Source:MGI Symbol;Acc:MGI:95994]	9756	blue	0.00824315	0.913287	0.0289253	0.702328	-0.717353	2.85659e-29	0.340655	3.49189e-06	-0.230364	0.00203772	0.545625	4.05222e-15	0.179695	0.0166995	0.943643	5.84331e-86	-0.909614	1.1534e-68	3.69569	2.93913	2.92938	3.63364	3.02864	3.01712	3.49103	3.00452	2.55871	3.95451	2.58898	2.97586	3.77326	2.61827	3.19287	3.82037	2.68493	2.89672	3.70342	2.99998	2.9064	3.83784	2.63593	2.96972	3.78559	2.81354	2.80546
ENSMUSG00000108678	Gm44758	predicted gene 44758 [Source:MGI Symbol;Acc:MGI:5753334]	2067	blue	-0.117351	0.11981	0.0587661	0.43718	-0.502178	1.06921e-12	0.29944	5.14683e-05	-0.0884283	0.241832	0.312314	2.3165e-05	0.162083	0.0311333	0.649802	1.3076e-22	-0.671907	1.35018e-24	2.06556	0	0.336264	1.30196	0	0.349939	1.0639	0.580041	0.490638	2.63819	0.961356	0.325645	1.4443	0	0	0.85591	0.450129	0	2.6049	0	0.349154	0.805094	0.577591	0	2.20856	0	0.899633
ENSMUSG00000108601	Gm44645	predicted gene 44645 [Source:MGI Symbol;Acc:MGI:5753221]	1652	blue	0.0744745	0.324542	0.0209628	0.781821	-0.353057	1.4358e-06	0.320074	1.40587e-05	0.00318664	0.966423	0.31879	1.52841e-05	-7.14461e-05	0.999247	0.563384	3.26071e-16	-0.58364	1.5224e-17	2.14301	1.51274	1.21019	1.90717	0.63821	1.02176	0.933337	1.51483	0	2.47943	0.671325	1.36971	1.65705	1.79825	0.95834	1.33344	0.938318	1.45763	1.64162	0	1.01991	1.26452	0.692463	0.701063	1.81468	0.77587	1.48803
ENSMUSG00000108599	Gm10616	predicted gene 10616 [Source:MGI Symbol;Acc:MGI:3642103]	2126	blue	-0.0993698	0.1882	0.048777	0.519107	-0.332906	5.96971e-06	-0.0275904	0.715458	-0.269912	0.000279964	0.372729	3.23842e-07	-0.00669648	0.929511	0.434713	1.48638e-09	-0.433994	1.59233e-09	1.4699	1.05672	0.594928	1.04874	0	0.34129	1.27127	0.566726	0	1.60036	0.941748	0.797919	0	0	0.793114	0.837882	0	0	1.61322	0	0.340522	0.787869	0	0.790188	1.12027	1.07509	1.08549
ENSMUSG00000047084	Ngrn	neugrin, neurite outgrowth associated [Source:MGI Symbol;Acc:MGI:1933212]	4159	blue	-0.0245866	0.745306	0.141535	0.0602262	-0.490387	4.25631e-12	0.0183928	0.808016	-0.371045	3.69326e-07	0.636252	1.79725e-21	-0.0347392	0.646206	0.663949	7.32561e-24	-0.650408	1.15943e-22	3.59501	3.12606	3.05404	3.46149	3.01296	3.15589	3.40265	3.31868	2.93422	3.542	2.87868	3.6089	3.54763	3.2275	3.35616	3.51922	3.19993	2.93735	3.55305	3.30778	3.27938	3.30935	3.06021	3.12178	3.37865	2.96156	3.40704
ENSMUSG00000030530	Furin	furin (paired basic amino acid cleaving enzyme) [Source:MGI Symbol;Acc:MGI:97513]	16851	blue	0.0158304	0.834346	-0.0743092	0.32562	-0.273609	0.000228781	0.470067	4.08067e-11	0.199519	0.00775759	-0.190223	0.0112119	0.290347	8.84603e-05	0.454394	2.11361e-10	-0.357071	1.06808e-06	1.69294	1.18394	1.53587	1.65872	1.66987	1.57852	1.74989	1.29685	1.42726	1.69752	1.94351	1.14496	2.09514	1.67192	1.46291	1.64889	1.48367	1.15887	1.73913	1.51371	1.05296	1.5256	1.3276	1.42593	2.02175	1.78401	1.52395
ENSMUSG00000108984	Gm44916	predicted gene 44916 [Source:MGI Symbol;Acc:MGI:5753492]	2193	blue	0.0954691	0.206221	0.00479246	0.949521	-0.284605	0.000123385	0.350527	1.72656e-06	0.127395	0.0910719	0.048976	0.517402	0.141009	0.061196	0.372809	3.21828e-07	-0.389232	8.58519e-08	0.514993	0	0.318926	0.42799	0	0.331974	0.425069	0	0	0.98918	0	0.308798	0	0	0	0.466427	0	0	0	0	0.331226	0.435269	0	0.305297	0	0	0
ENSMUSG00000108825	Gm45838	predicted gene 45838 [Source:MGI Symbol;Acc:MGI:5804953]	2446	blue	0.0372941	0.622138	-0.00632389	0.933423	-0.521875	9.41733e-14	0.468871	4.63967e-11	0.0195879	0.795807	0.267535	0.000318279	0.160465	0.0328787	0.691056	1.84482e-26	-0.667032	3.8282e-24	0.469485	0	0	1.51491	0.808647	0.30097	0.9423	0.27394	0	0	0	0.279754	0.788514	0	0.277763	0	0	0	0.779023	0	0	0.706176	0	0	0.422341	0.566598	0.314782
ENSMUSG00000070462	Tlnrd1	talin rod domain containing 1 [Source:MGI Symbol;Acc:MGI:1891420]	4432	blue	-0.00473254	0.950151	-0.0573798	0.448089	-0.803601	2.72563e-41	-0.143277	0.0571052	-0.556536	8.77121e-16	0.355724	1.18013e-06	0.505056	7.56937e-13	0.603899	5.69705e-19	-0.543662	5.30549e-15	3.21388	2.36325	2.26151	3.25464	2.47577	2.02595	3.45981	2.26554	2.85483	3.13728	2.65552	2.32636	3.26752	2.42958	1.93062	3.43573	2.83749	2.0892	3.90953	2.5427	2.23369	2.99461	2.75288	2.27746	3.21082	2.39166	2.37059
ENSMUSG00000097162	2310010J17Rik	RIKEN cDNA 2310010J17 gene [Source:MGI Symbol;Acc:MGI:1925579]	5865	blue	-0.0171873	0.820378	-0.0104983	0.8897	-0.654412	5.19928e-23	0.0513281	0.497464	-0.375139	2.67975e-07	0.438317	1.04951e-09	0.225286	0.00257098	0.68515	7.18248e-26	-0.6586	2.21829e-23	2.01709	1.1208	1.3104	2.28511	1.52639	1.60009	2.45525	1.50149	1.43994	2.33673	1.4163	1.27971	2.01192	1.36202	1.68421	1.83548	1.11198	1.41827	2.14856	1.4976	0.825379	2.05668	1.62398	0.911662	2.22891	1.26561	1.50099
ENSMUSG00000044362	Ccdc89	coiled-coil domain containing 89 [Source:MGI Symbol;Acc:MGI:1917304]	2092	blue	-0.0492354	0.515183	0.106887	0.156769	-0.307044	3.22643e-05	0.221037	0.0031112	-0.0432883	0.567253	0.294962	6.73534e-05	-0.0015189	0.983992	0.445818	5.02078e-10	-0.454172	2.16202e-10	1.88682	0	0	0	0	0	0.78103	0.315553	0	0	0	0	0.511147	0	0	1.13772	0	0	0.877447	0	0	0	0	0.579278	1.37329	0.643786	0.650916
ENSMUSG00000030613	Ccdc90b	coiled-coil domain containing 90B [Source:MGI Symbol;Acc:MGI:1913615]	21145	blue	0.0518149	0.493389	0.0968431	0.199737	-0.620164	3.42403e-20	0.264555	0.000373189	-0.203954	0.00647152	0.556628	8.65563e-16	0.0944605	0.211077	0.781501	1.0739e-37	-0.788324	9.2682e-39	1.32924	0.659228	0.714985	0.809147	0.476358	0.402731	0.80426	0.725171	0.439751	1.15442	0.760772	0.603906	0.976374	0.660651	0.503367	1.07614	0.363283	0.522712	1.19139	0.627384	0.567344	1.09237	0.418898	0.597685	0.89958	0.585728	0.565093
ENSMUSG00000041328	Pcf11	PCF11 cleavage and polyadenylation factor subunit [Source:MGI Symbol;Acc:MGI:1919579]	26391	blue	0.050841	0.501559	-0.0883045	0.242494	-0.65488	4.72999e-23	0.473039	2.95887e-11	-0.0509771	0.500413	0.262075	0.000425443	0.292896	7.61417e-05	0.841246	1.30181e-48	-0.776621	5.87166e-37	2.40962	1.68008	1.80221	2.26809	1.61112	1.70376	2.39802	1.66476	1.47334	2.08177	1.67282	1.87871	2.19302	1.87803	1.70618	2.51747	1.73247	1.72068	2.50545	1.76579	1.81991	2.35788	1.7941	1.57432	2.48598	1.9461	1.76359
ENSMUSG00000109257	Gm45200	predicted gene 45200 [Source:MGI Symbol;Acc:MGI:5753776]	918	blue	0.0320185	0.672245	0.00839483	0.911698	-0.272668	0.000240912	0.521242	1.02077e-13	0.272335	0.000245344	-0.0356885	0.637219	0.204742	0.00626395	0.405454	2.16455e-08	-0.388647	9.01019e-08	1.01778	0	0.669948	1.79704	0	0.694291	2.09562	0	0.935129	1.12207	1.04705	0	2.54712	1.69138	0	0.934931	0	1.17455	2.26765	0.923171	0.692899	0.880707	0	0.644314	0.930694	0	0
ENSMUSG00000051515	Fam181b	family with sequence similarity 181, member B [Source:MGI Symbol;Acc:MGI:1930951]	2001	blue	-0.123015	0.102844	-0.0286649	0.704883	-0.583019	1.67759e-17	0.0651908	0.388644	-0.316243	1.80211e-05	0.319521	1.45745e-05	0.285537	0.000116957	0.609973	2.03153e-19	-0.562698	3.60424e-16	2.62565	3.76812	2.17786	3.16163	3.21232	2.73795	2.88435	2.61168	2.59003	2.79445	2.55873	2.91445	2.76102	2.61223	2.43616	3.22745	2.818	2.63017	3.67977	2.35385	2.67221	3.18666	3.10918	2.28519	3.61174	1.9782	3.12916
ENSMUSG00000035686	Thrsp	thyroid hormone responsive [Source:MGI Symbol;Acc:MGI:109126]	4792	blue	-0.00684681	0.927932	-0.0424643	0.57466	-0.387895	9.5868e-08	0.301065	4.66302e-05	-0.0886846	0.240464	0.285574	0.000116708	0.135742	0.071628	0.649642	1.3497e-22	-0.58308	1.66169e-17	1.65971	1.4632	1.97956	2.30778	1.22817	2.29497	2.20366	2.24358	1.45798	1.36614	1.6991	2.05921	1.69038	1.64877	2.35562	2.05106	1.45279	1.35924	2.65514	1.53042	1.89394	2.2833	2.44886	1.92758	2.04432	1.88786	1.80286
ENSMUSG00000030753	Thap12	THAP domain containing 12 [Source:MGI Symbol;Acc:MGI:1920231]	14959	blue	-0.0377913	0.6175	-0.153334	0.0415908	-0.28542	0.000117746	-0.0606983	0.42223	-0.309722	2.72862e-05	0.436621	1.23691e-09	-0.0309799	0.682291	0.452988	2.43953e-10	-0.428058	2.79603e-09	2.7491	2.58856	2.68715	2.80205	2.4717	2.82921	2.62615	2.9062	2.53941	2.58066	2.65544	2.88131	2.78381	2.39003	2.83689	2.83896	2.51232	2.51256	2.67474	2.43301	2.35727	2.63561	2.43885	2.74431	2.76204	2.51583	2.60956
ENSMUSG00000070436	Serpinh1	serine (or cysteine) peptidase inhibitor, clade H, member 1 [Source:MGI Symbol;Acc:MGI:88283]	7863	blue	-0.0401382	0.595811	-0.0049164	0.948217	-0.468243	4.96265e-11	0.0912937	0.226854	-0.258529	0.000512002	0.656328	3.52738e-23	-0.0956605	0.205309	0.658706	2.17051e-23	-0.68683	4.8944e-26	1.41956	0.830933	0.757029	1.28972	0.766711	1.37159	1.33856	0.778651	0.145981	1.85199	0.583001	0.736101	1.54749	0.60466	0.993267	1.78593	0.743118	0.598108	1.29142	0.504427	1.19889	1.05686	0.601901	0.891016	1.31102	0.534968	0.463873
ENSMUSG00000035227	Spcs2	signal peptidase complex subunit 2 homolog (S. cerevisiae) [Source:MGI Symbol;Acc:MGI:1913874]	25893	blue	-0.0538151	0.476832	0.048322	0.523018	-0.565975	2.22935e-16	0.154984	0.0394195	-0.311956	2.36962e-05	0.754188	8.60707e-34	-0.0895497	0.23589	0.839963	2.48091e-48	-0.860214	4.56143e-53	2.51684	1.78819	1.48646	2.14478	1.57914	1.69384	2.21021	1.85097	1.40552	2.54569	1.28485	1.78491	2.5212	1.45369	1.95907	2.36115	1.5505	1.92907	2.62621	1.60107	1.83966	2.23219	1.79749	1.68508	1.99562	1.51756	1.79266
ENSMUSG00000030701	Plekhb1	pleckstrin homology domain containing, family B (evectins) member 1 [Source:MGI Symbol;Acc:MGI:1351469]	19522	blue	-0.0168	0.824359	-0.07756	0.304843	-0.401556	3.03435e-08	0.377389	2.24252e-07	-0.0516478	0.494786	0.514658	2.33588e-13	-0.111408	0.139868	0.80095	7.76864e-41	-0.782378	7.87516e-38	3.0986	1.52716	2.46003	3.01785	1.86262	2.30825	2.72673	2.24688	2.0761	3.10097	2.0735	2.28121	2.71341	1.42091	2.4996	2.8769	1.75058	2.18497	3.02356	1.99726	2.69586	2.92724	1.74239	2.43155	2.80028	1.57962	2.17416
ENSMUSG00000032737	Inppl1	inositol polyphosphate phosphatase-like 1 [Source:MGI Symbol;Acc:MGI:1333787]	15597	blue	-0.0409968	0.587963	0.0215125	0.776249	-0.39381	5.86288e-08	0.0471164	0.533451	-0.322604	1.19103e-05	0.594783	2.57127e-18	-0.174102	0.0204715	0.628551	7.52685e-21	-0.617638	5.35613e-20	1.55098	1.46826	1.4538	1.87606	1.236	1.54996	1.64143	1.55325	1.49834	1.2953	1.46325	1.49168	1.81117	1.24971	1.63118	1.60375	1.45782	1.43399	1.67333	1.45462	1.6512	1.57561	1.07673	1.57927	2.05201	1.14208	1.50356
ENSMUSG00000001827	Folr1	folate receptor 1 (adult) [Source:MGI Symbol;Acc:MGI:95568]	12457	blue	0.0699055	0.355187	0.0533801	0.480407	0.210281	0.00496554	0.27033	0.000273676	0.211138	0.00478774	0.323573	1.11734e-05	-0.533887	1.97825e-14	0.27782	0.000181159	-0.302133	4.36851e-05	0.612257	0	0	0.629648	0	1.34974	0.785623	1.62948	0	0.832174	0	0.74182	1.19237	0	1.85854	0.620633	0	0	1.17968	0.092275	0.0641022	0.581085	0	1.31824	0.553325	0	0.131922
ENSMUSG00000073940	Hbb-bt	hemoglobin, beta adult t chain [Source:MGI Symbol;Acc:MGI:5474850]	1472	blue	-0.160083	0.0333026	0.10853	0.150459	-0.440887	8.16915e-10	-0.143286	0.0570901	-0.404141	2.42662e-08	0.310019	2.678e-05	0.251778	0.000723333	0.395298	5.17274e-08	-0.355399	1.20873e-06	4.98538	4.96173	5.01478	6.05189	5.44167	4.90255	5.82376	5.94969	6.1605	4.65618	4.85448	5.01307	5.09739	5.41667	5.13838	5.7819	5.12661	4.59274	5.65458	5.17849	5.30193	4.73921	4.80547	4.86238	4.89831	4.89605	5.07971
ENSMUSG00000052305	Hbb-bs	hemoglobin, beta adult s chain [Source:MGI Symbol;Acc:MGI:5474852]	1562	blue	-0.107582	0.154073	0.0759773	0.314847	-0.497285	1.90897e-12	-0.0835191	0.269069	-0.393494	6.02064e-08	0.381985	1.55197e-07	0.254134	0.000641846	0.494394	2.67741e-12	-0.461555	1.00725e-10	6.49407	6.62958	6.59275	7.50281	6.93336	6.96429	7.45633	7.41462	7.88457	6.13236	6.37668	6.66096	6.96082	7.10098	6.98876	7.56702	6.90344	6.48648	7.42137	6.67435	6.8472	6.56896	7.02241	6.53891	6.50788	6.83275	6.54533
ENSMUSG00000047225	Or56a4	olfactory receptor family 56 subfamily A member 4 [Source:MGI Symbol;Acc:MGI:3030518]	8961	blue	-0.0444971	0.55647	-0.00335344	0.964666	-0.52175	9.56929e-14	0.293507	7.34374e-05	-0.10825	0.151518	0.330209	7.17042e-06	0.154688	0.0398016	0.68675	4.98492e-26	-0.699649	2.40662e-27	1.10758	0.118261	0	0.670504	0	0.0885751	0.587955	0	0	1.05992	0	0	1.25681	0	0	1.08468	0	0.0900369	0.833274	0	0	0.516942	0	0	1.14198	0	0.0929574
ENSMUSG00000043948	Or52b2	olfactory receptor family 52 subfamily B member 2 [Source:MGI Symbol;Acc:MGI:3030525]	6761	blue	-0.0804635	0.287039	0.0592875	0.433116	-0.384075	1.31027e-07	0.315833	1.85025e-05	-0.0151606	0.84126	0.166781	0.0265063	0.172203	0.0219102	0.537151	1.28081e-14	-0.548037	2.90264e-15	0.761908	0.154742	0	0.291651	0	0.323969	0.530621	0	0.168435	0.712839	0.659127	0.107576	0.839447	0	0.20617	0.319162	0	0.423748	0	0.31428	0.223327	0.65181	0	0.106272	0.577409	0	0
ENSMUSG00000110077	Gm45632	predicted gene 45632 [Source:MGI Symbol;Acc:MGI:5791468]	1887	blue	-0.0281995	0.709457	-0.0301184	0.690667	-0.373903	2.95359e-07	0.2072	0.0056544	-0.0630727	0.404274	0.110007	0.144949	0.236991	0.00149328	0.38914	8.65054e-08	-0.359426	8.96193e-07	0	0	0	0	0.572506	0	0.48357	0.346021	0	1.10084	0	0	0.958098	0	0	0	0	0.384946	0	0.522083	0	0.494948	0.622294	0.349241	0.526921	1.16803	0.396218
ENSMUSG00000030888	Rrp8	ribosomal RNA processing 8 [Source:MGI Symbol;Acc:MGI:1914251]	5655	blue	0.0944199	0.211274	-0.083236	0.270701	-0.419057	6.43221e-09	0.36848	4.50492e-07	0.0475818	0.529411	-0.00589387	0.937941	0.305799	3.48585e-05	0.474947	2.40342e-11	-0.400402	3.35096e-08	1.11405	1.53363	0.970427	1.38247	0.722608	1.14015	1.13479	1.06029	0.799331	0.818856	1.02757	1.25603	1.0711	1.29148	1.19262	1.22166	0.850426	1.08576	1.4347	0.905335	0.585365	1.15647	0.62283	1.12969	1.46742	0.699718	0.507771
ENSMUSG00000030890	Ilk	integrin linked kinase [Source:MGI Symbol;Acc:MGI:1195267]	6333	blue	-0.0341229	0.652068	-0.160545	0.0327901	-0.46964	4.27234e-11	-0.121771	0.106397	-0.439971	8.93457e-10	0.45398	2.20484e-10	0.170635	0.0231627	0.49885	1.58757e-12	-0.468745	4.7031e-11	2.19068	1.29307	1.44011	1.9524	1.45506	1.65548	1.64878	1.47341	1.21542	1.60722	1.58946	1.57704	1.87522	1.55542	1.44469	2.06077	1.13429	1.06588	1.74438	1.73923	1.47891	1.37034	1.29059	1.56492	1.75036	0.947806	1.43034
ENSMUSG00000030879	Mrpl17	mitochondrial ribosomal protein L17 [Source:MGI Symbol;Acc:MGI:1351608]	7893	blue	-0.104535	0.166147	0.0477397	0.528044	-0.483218	9.61074e-12	0.110276	0.143964	-0.284007	0.000127687	0.535486	1.59984e-14	0.0396891	0.599934	0.711769	1.1992e-28	-0.712991	8.7854e-29	2.61475	2.37026	1.90671	2.46202	2.31017	2.22226	2.50201	2.06186	1.90997	2.56716	1.69257	2.10959	2.49067	1.94581	2.12285	2.23624	2.15446	1.88952	2.63554	1.6252	1.7201	2.38055	1.73156	2.37593	2.7423	2.04629	1.89536
ENSMUSG00000109147	4930431P19Rik	RIKEN cDNA 4930431P19 gene [Source:MGI Symbol;Acc:MGI:1921136]	3008	blue	-0.00598775	0.936955	-0.0283901	0.707582	-0.551536	1.78086e-15	0.334645	5.29959e-06	-0.0929659	0.218422	0.321945	1.24384e-05	0.182005	0.0153276	0.711373	1.32574e-28	-0.705343	5.99367e-28	2.04529	1.33738	0.783648	0.588392	0.688089	0.249302	1.5842	1.01451	0.875816	2.08125	0.723203	1.03143	2.36173	0.748855	0.602113	1.07934	0.811344	1.10505	1.11397	1.24346	0.460807	1.72714	0.745591	1.34844	2.01512	0.833747	0.993743
ENSMUSG00000035901	Dennd5a	DENN/MADD domain containing 5A [Source:MGI Symbol;Acc:MGI:1201681]	66690	blue	0.0803345	0.287815	-0.00675105	0.928938	-0.666841	3.98563e-24	0.315393	1.90319e-05	-0.1651	0.0280892	0.361609	7.60682e-07	0.222769	0.00287977	0.77937	2.26708e-37	-0.741508	3.78297e-32	1.64621	0.990699	1.27721	1.53433	1.09098	1.10339	1.69193	1.19437	1.34009	1.61969	1.44995	1.22295	1.69036	1.19475	1.14716	1.63626	1.19772	1.12221	1.56382	1.30343	1.21128	1.48282	1.31048	1.21736	1.4963	1.22703	1.26544
ENSMUSG00000047554	Tmem41b	transmembrane protein 41B [Source:MGI Symbol;Acc:MGI:1289225]	14742	blue	0.0396381	0.600404	-0.112806	0.134932	-0.560955	4.6438e-16	-0.0173004	0.819216	-0.383414	1.38248e-07	0.359761	8.74018e-07	0.265344	0.00035785	0.581706	2.05872e-17	-0.531787	2.61045e-14	1.22659	1.16751	0.995437	1.45772	1.168	1.00052	1.21737	1.12408	0.974908	1.25827	0.84543	1.09502	0.785792	1.0295	0.938027	1.57882	1.15844	1.01275	1.34728	0.962592	1.18074	1.36268	1.02539	1.03686	1.2353	1.37643	1.17256
ENSMUSG00000064451	Snora23	small nucleolar RNA, H/ACA box 23 [Source:MGI Symbol;Acc:MGI:3819494]	183	blue	-0.0303237	0.688667	0.01823	0.809682	-0.282386	0.000140048	0.260533	0.000461281	0.00462899	0.951241	0.281334	0.000148661	-0.0830612	0.271712	0.460514	1.12307e-10	-0.46816	5.00685e-11	2.61843	2.3738	2.79276	4.13377	3.46539	2.03583	4.89444	2.72024	3.34348	4.22549	3.54819	2.74854	3.42238	2.7208	1.94028	3.34311	2.3606	3.76696	4.63948	3.3208	2.03307	4.71815	2.71396	3.91849	4.26178	2.89326	2.09051
ENSMUSG00000031016	Wee1	WEE 1 homolog 1 (S. pombe) [Source:MGI Symbol;Acc:MGI:103075]	21240	blue	0.0351427	0.64238	-0.0477164	0.528245	-0.66551	5.27854e-24	-0.039937	0.597656	-0.383462	1.37709e-07	0.0675959	0.371345	0.538221	1.10961e-14	0.446553	4.66645e-10	-0.372658	3.25635e-07	1.29962	1.26638	1.03372	1.40068	1.14516	0.911931	1.11599	0.955418	1.22667	1.47501	1.22435	0.85855	1.3263	1.17169	0.929527	1.25053	0.972405	0.943913	1.18776	1.3934	0.868721	1.39847	1.31344	1.0836	1.3377	0.957333	1.16057
ENSMUSG00000030669	Calca	calcitonin/calcitonin-related polypeptide, alpha [Source:MGI Symbol;Acc:MGI:2151253]	4879	blue	-0.120838	0.109125	-0.116438	0.122738	-0.241145	0.00122349	0.0501512	0.50739	-0.150703	0.0452617	0.395088	5.26522e-08	-0.102895	0.172932	0.401921	2.94046e-08	-0.411417	1.28009e-08	1.55001	0.21026	0.15212	1.06116	0	0.158719	0.82378	0.143826	0.228489	1.35031	0	0	0.629403	0	0.399793	1.02102	0.20805	0.438107	0.238138	0	0.857593	0.396793	0	0.7098	0.750189	0.311683	0.793621
[truncated: 5,658 more rows]
[truncated: 150 more columns]

## Sheet: Module ANOVA Results
module	MEblue	MEbrown	MEturquoise	MEgreen	MEyellow
Brain.Region_p-value	0	0.00216995	0	8.45371e-06	7.95573e-05
Dam.Treatment.Group_p-value	0.111718	0.560195	0.830904	0.305101	0.119227
Dam.Treatment.Group:Brain.Region_p-value	0.178474	0.0410446	0.160067	0.049072	0.0496201
[truncated: 12 more rows]

## Sheet: Module BH posthocs 
	contrast	sex	Brain.Region	estimate	SE	df	t.ratio	p.value	padjust	module
[truncated: 180 more rows]

[truncated: 3 more sheets: GO Enrichments, MGEnrichments, Top Hub Genes]
