# Supplementary material for: Sex specific effects of adoptive Tregs transfer on the brain and periphery in maternal immune activation offspring rescuing immune dysregulation
Source: J Neuroinflammation. 2026 Mar 12;23:133. doi: 10.1186/s12974-026-03739-w (PMC13097898; doi:10.1186/s12974-026-03739-w)
Supplement: Supplementary file 3 — Supplementary Material 3. [file 12974_2026_3739_MOESM3_ESM.xlsx]

## Sheet: Master Experiment Info
Mouse.Number	Sample.ID	Dam.Treatment.Group	Pup.Treatment.Group	Group	Brain.Region	Cage	Sex	DamID	DOB
3	PA3C1	Saline	Saline	Saline_Saline_F_Cerebellum	Cerebellum	1	F	91	2018-04-23
3	PA3FC1	Saline	Saline	Saline_Saline_F_Frontal Cortex	Frontal Cortex	1	F	91	2018-04-23
3	PA3H1	Saline	Saline	Saline_Saline_F_Hippocampus	Hippocampus	1	F	91	2018-04-23
7	PA7C2	Saline	Saline	Saline_Saline_M_Cerebellum	Cerebellum	2	M	77	2018-04-22
7	PA7FC2	Saline	Saline	Saline_Saline_M_Frontal Cortex	Frontal Cortex	2	M	77	2018-04-22
7	PA7H2	Saline	Saline	Saline_Saline_M_Hippocampus	Hippocampus	2	M	77	2018-04-22
8	PA8C3	Saline	Treg	Saline_Treg_M_Cerebellum	Cerebellum	3	M	84	2018-04-22
8	PA8H3	Saline	Treg	Saline_Treg_M_Hippocampus	Hippocampus	3	M	84	2018-04-22
8	PA8FC3	Saline	Treg	Saline_Treg_M_Frontal Cortex	Frontal Cortex	3	M	84	2018-04-22
13	PA13C4	Saline	Saline	Saline_Saline_M_Cerebellum	Cerebellum	5	M	59	2018-04-23
13	PA13FC4	Saline	Saline	Saline_Saline_M_Frontal Cortex	Frontal Cortex	5	M	59	2018-04-23
13	PA13H4	Saline	Saline	Saline_Saline_M_Hippocampus	Hippocampus	5	M	59	2018-04-23
17	PA17C5	PolyIC	Treg	PolyIC_Treg_M_Cerebellum	Cerebellum	6	M	52	2018-04-24
17	PA17FC5	PolyIC	Treg	PolyIC_Treg_M_Frontal Cortex	Frontal Cortex	6	M	52	2018-04-24
17	PA17H5	PolyIC	Treg	PolyIC_Treg_M_Hippocampus	Hippocampus	6	M	52	2018-04-24
18	PA18C6	PolyIC	Saline	PolyIC_Saline_M_Cerebellum	Cerebellum	7	M	52	2018-04-24
18	PA18FC6	PolyIC	Saline	PolyIC_Saline_M_Frontal Cortex	Frontal Cortex	7	M	52	2018-04-24
18	PA18H6	PolyIC	Saline	PolyIC_Saline_M_Hippocampus	Hippocampus	7	M	52	2018-04-24
23	PA23C7	Saline	Treg	Saline_Treg_F_Cerebellum	Cerebellum	8	F	91	2018-04-23
23	PA23FC7	Saline	Treg	Saline_Treg_F_Frontal Cortex	Frontal Cortex	8	F	91	2018-04-23
23	PA23H7	Saline	Treg	Saline_Treg_F_Hippocampus	Hippocampus	8	F	91	2018-04-23
25	PA25C8	PolyIC	Saline	PolyIC_Saline_F_Cerebellum	Cerebellum	9	F	75	2018-05-02
25	PA25FC8	PolyIC	Saline	PolyIC_Saline_F_Frontal Cortex	Frontal Cortex	9	F	75	2018-05-02
25	PA25H8	PolyIC	Saline	PolyIC_Saline_F_Hippocampus	Hippocampus	9	F	75	2018-05-02
28	PA28C9	PolyIC	Treg	PolyIC_Treg_F_Cerebellum	Cerebellum	10	F	75	2018-05-02
28	PA28FC9	PolyIC	Treg	PolyIC_Treg_F_Frontal Cortex	Frontal Cortex	10	F	75	2018-05-02
28	PA28H9	PolyIC	Treg	PolyIC_Treg_F_Hippocampus	Hippocampus	10	F	75	2018-05-02
31	PA31C10	Saline	Saline	Saline_Saline_F_Cerebellum	Cerebellum	12	F	77	2018-04-22
31	PA31FC10	Saline	Saline	Saline_Saline_F_Frontal Cortex	Frontal Cortex	12	F	77	2018-04-22
31	PA31H10	Saline	Saline	Saline_Saline_F_Hippocampus	Hippocampus	12	F	77	2018-04-22
42	PA42C11	PolyIC	Treg	PolyIC_Treg_F_Cerebellum	Cerebellum	14	F	93	2018-04-23
42	PA42FC11	PolyIC	Treg	PolyIC_Treg_F_Frontal Cortex	Frontal Cortex	14	F	93	2018-04-23
42	PA42H11	PolyIC	Treg	PolyIC_Treg_F_Hippocampus	Hippocampus	14	F	93	2018-04-23
43	PA43C12	PolyIC	Saline	PolyIC_Saline_F_Cerebellum	Cerebellum	15	F	53	2018-04-23
43	PA43FC12	PolyIC	Saline	PolyIC_Saline_F_Frontal Cortex	Frontal Cortex	15	F	53	2018-04-23
43	PA43H12	PolyIC	Saline	PolyIC_Saline_F_Hippocampus	Hippocampus	15	F	53	2018-04-23
45	PA45C13	PolyIC	Saline	PolyIC_Saline_F_Cerebellum	Cerebellum	15	F	93	2018-04-23
45	PA45FC13	PolyIC	Saline	PolyIC_Saline_F_Frontal Cortex	Frontal Cortex	15	F	93	2018-04-23
45	PA45H13	PolyIC	Saline	PolyIC_Saline_F_Hippocampus	Hippocampus	15	F	93	2018-04-23
48	PA48C14	Saline	Treg	Saline_Treg_F_Cerebellum	Cerebellum	16	F	81	2018-04-24
48	PA48FC14	Saline	Treg	Saline_Treg_F_Frontal Cortex	Frontal Cortex	16	F	81	2018-04-24
48	PA48H14	Saline	Treg	Saline_Treg_F_Hippocampus	Hippocampus	16	F	81	2018-04-24
49	PA49C15	Saline	Treg	Saline_Treg_F_Cerebellum	Cerebellum	16	F	72	2018-05-01
49	PA49FC15	Saline	Treg	Saline_Treg_F_Frontal Cortex	Frontal Cortex	16	F	72	2018-05-01
49	PA49H15	Saline	Treg	Saline_Treg_F_Hippocampus	Hippocampus	16	F	72	2018-05-01
51	PA51C16	Saline	Saline	Saline_Saline_F_Cerebellum	Cerebellum	17	F	72	2018-05-01
51	PA51FC16	Saline	Saline	Saline_Saline_F_Frontal Cortex	Frontal Cortex	17	F	72	2018-05-01
51	PA51H16	Saline	Saline	Saline_Saline_F_Hippocampus	Hippocampus	17	F	72	2018-05-01
53	PA53C17	Saline	Saline	Saline_Saline_F_Cerebellum	Cerebellum	17	F	59	2018-04-23
53	PA53FC17	Saline	Saline	Saline_Saline_F_Frontal Cortex	Frontal Cortex	17	F	59	2018-04-23
53	PA53H17	Saline	Saline	Saline_Saline_F_Hippocampus	Hippocampus	17	F	59	2018-04-23
56	PA56C18	Saline	Treg	Saline_Treg_F_Cerebellum	Cerebellum	18	F	51	2018-04-30
56	PA56FC18	Saline	Treg	Saline_Treg_F_Frontal Cortex	Frontal Cortex	18	F	51	2018-04-30
56	PA56H18	Saline	Treg	Saline_Treg_F_Hippocampus	Hippocampus	18	F	51	2018-04-30
60	PA60C19	PolyIC	Treg	PolyIC_Treg_F_Cerebellum	Cerebellum	19	F	53	2018-04-23
60	PA60FC19	PolyIC	Treg	PolyIC_Treg_F_Frontal Cortex	Frontal Cortex	19	F	53	2018-04-23
60	PA60H19	PolyIC	Treg	PolyIC_Treg_F_Hippocampus	Hippocampus	19	F	53	2018-04-23
62	PA62C20	PolyIC	Treg	PolyIC_Treg_F_Cerebellum	Cerebellum	19	F	58	2018-04-30
62	PA62FC20	PolyIC	Treg	PolyIC_Treg_F_Frontal Cortex	Frontal Cortex	19	F	58	2018-04-30
62	PA62H20	PolyIC	Treg	PolyIC_Treg_F_Hippocampus	Hippocampus	19	F	58	2018-04-30
66	PA66C21	PolyIC	Treg	PolyIC_Treg_F_Cerebellum	Cerebellum	20	F	63	2018-05-09
66	PA66FC21	PolyIC	Treg	PolyIC_Treg_F_Frontal Cortex	Frontal Cortex	20	F	63	2018-05-09
66	PA66H21	PolyIC	Treg	PolyIC_Treg_F_Hippocampus	Hippocampus	20	F	63	2018-05-09
71	PA71C22	PolyIC	Treg	PolyIC_Treg_M_Cerebellum	Cerebellum	22	M	53	2018-04-23
71	PA71FC22	PolyIC	Treg	PolyIC_Treg_M_Frontal Cortex	Frontal Cortex	22	M	53	2018-04-23
71	PA71H22	PolyIC	Treg	PolyIC_Treg_M_Hippocampus	Hippocampus	22	M	53	2018-04-23
74	PA74C23	PolyIC	Treg	PolyIC_Treg_M_Cerebellum	Cerebellum	23	M	85	2018-04-30
74	PA74FC23	PolyIC	Treg	PolyIC_Treg_M_Frontal Cortex	Frontal Cortex	23	M	85	2018-04-30
74	PA74H23	PolyIC	Treg	PolyIC_Treg_M_Hippocampus	Hippocampus	23	M	85	2018-04-30
76	PA76C24	PolyIC	Saline	PolyIC_Saline_M_Cerebellum	Cerebellum	24	M	85	2018-04-30
76	PA76FC24	PolyIC	Saline	PolyIC_Saline_M_Frontal Cortex	Frontal Cortex	24	M	85	2018-04-30
76	PA76H24	PolyIC	Saline	PolyIC_Saline_M_Hippocampus	Hippocampus	24	M	85	2018-04-30
79	PA79FC25	PolyIC	Treg	PolyIC_Treg_M_Frontal Cortex	Frontal Cortex	25	M	94	2018-04-24
79	PA79H25	PolyIC	Treg	PolyIC_Treg_M_Hippocampus	Hippocampus	25	M	94	2018-04-24
79	PPA79C25	PolyIC	Treg	PolyIC_Treg_M_Cerebellum	Cerebellum	25	M	94	2018-04-24
81	PA81FC26	PolyIC	Treg	PolyIC_Treg_M_Frontal Cortex	Frontal Cortex	25	M	93	2018-04-23
81	PA81H26	PolyIC	Treg	PolyIC_Treg_M_Hippocampus	Hippocampus	25	M	93	2018-04-23
81	PA81C26	PolyIC	Treg	PolyIC_Treg_M_Cerebellum	Cerebellum	25	M	93	2018-04-23
83	PA83C25	PolyIC	Saline	PolyIC_Saline_M_Cerebellum	Cerebellum	26	M	94	2018-04-24
83	PA83H27	PolyIC	Saline	PolyIC_Saline_M_Hippocampus	Hippocampus	26	M	94	2018-04-24
83	PA83FC27	PolyIC	Saline	PolyIC_Saline_M_Frontal Cortex	Frontal Cortex	26	M	94	2018-04-24
85	PA85C26	PolyIC	Saline	PolyIC_Saline_M_Cerebellum	Cerebellum	26	M	93	2018-04-23
85	PA85FC28	PolyIC	Saline	PolyIC_Saline_M_Frontal Cortex	Frontal Cortex	26	M	93	2018-04-23
85	PA85H28	PolyIC	Saline	PolyIC_Saline_M_Hippocampus	Hippocampus	26	M	93	2018-04-23
89	PA89FC29	PolyIC	Treg	PolyIC_Treg_M_Frontal Cortex	Frontal Cortex	27	M	63	2018-04-24
89	PA89H29	PolyIC	Treg	PolyIC_Treg_M_Hippocampus	Hippocampus	27	M	63	2018-04-24
89	PA89C27	PolyIC	Treg	PolyIC_Treg_M_Cerebellum	Cerebellum	27	M	63	2018-04-24
92	PA92C28	PolyIC	Saline	PolyIC_Saline_M_Cerebellum	Cerebellum	28	M	75	2018-05-02
92	PA92FC30	PolyIC	Saline	PolyIC_Saline_M_Frontal Cortex	Frontal Cortex	28	M	75	2018-05-02
92	PA92H30	PolyIC	Saline	PolyIC_Saline_M_Hippocampus	Hippocampus	28	M	75	2018-05-02
98	PA98C29	PolyIC	Treg	PolyIC_Treg_M_Cerebellum	Cerebellum	30	M	64	2018-04-30
98	PA98FC31	PolyIC	Treg	PolyIC_Treg_M_Frontal Cortex	Frontal Cortex	30	M	64	2018-04-30
98	PA98H31	PolyIC	Treg	PolyIC_Treg_M_Hippocampus	Hippocampus	30	M	64	2018-04-30
100	PA100C30	PolyIC	Treg	PolyIC_Treg_M_Cerebellum	Cerebellum	30	M	58	2018-04-30
100	PA100FC32	PolyIC	Treg	PolyIC_Treg_M_Frontal Cortex	Frontal Cortex	30	M	58	2018-04-30
100	PA100H32	PolyIC	Treg	PolyIC_Treg_M_Hippocampus	Hippocampus	30	M	58	2018-04-30
101	PA101C31	PolyIC	Saline	PolyIC_Saline_M_Cerebellum	Cerebellum	31	M	64	2018-04-30
101	PA101FC33	PolyIC	Saline	PolyIC_Saline_M_Frontal Cortex	Frontal Cortex	31	M	64	2018-04-30
101	PA101H33	PolyIC	Saline	PolyIC_Saline_M_Hippocampus	Hippocampus	31	M	64	2018-04-30
103	PA103C32	PolyIC	Saline	PolyIC_Saline_M_Cerebellum	Cerebellum	31	M	58	2018-04-30
103	PA103FC34	PolyIC	Saline	PolyIC_Saline_M_Frontal Cortex	Frontal Cortex	31	M	58	2018-04-30
103	PA103H34	PolyIC	Saline	PolyIC_Saline_M_Hippocampus	Hippocampus	31	M	58	2018-04-30
106	PA106C33	Saline	Treg	Saline_Treg_M_Cerebellum	Cerebellum	32	M	54	2018-05-08
106	PA106FC35	Saline	Treg	Saline_Treg_M_Frontal Cortex	Frontal Cortex	32	M	54	2018-05-08
106	PA106H35	Saline	Treg	Saline_Treg_M_Hippocampus	Hippocampus	32	M	54	2018-05-08
108	PA108C34	Saline	Treg	Saline_Treg_M_Cerebellum	Cerebellum	32	M	54	2018-05-08
108	PA108FC36	Saline	Treg	Saline_Treg_M_Frontal Cortex	Frontal Cortex	32	M	54	2018-05-08
108	PA108H36	Saline	Treg	Saline_Treg_M_Hippocampus	Hippocampus	32	M	54	2018-05-08
110	PA110C35	Saline	Treg	Saline_Treg_M_Cerebellum	Cerebellum	33	M	72	2018-05-01
110	PA110FC37	Saline	Treg	Saline_Treg_M_Frontal Cortex	Frontal Cortex	33	M	72	2018-05-01
110	PA110H37	Saline	Treg	Saline_Treg_M_Hippocampus	Hippocampus	33	M	72	2018-05-01
111	PA111C36	Saline	Treg	Saline_Treg_M_Cerebellum	Cerebellum	33	M	57	2018-05-01
111	PA111FC38	Saline	Treg	Saline_Treg_M_Frontal Cortex	Frontal Cortex	33	M	57	2018-05-01
111	PA111H38	Saline	Treg	Saline_Treg_M_Hippocampus	Hippocampus	33	M	57	2018-05-01
113	PA113C37	Saline	Treg	Saline_Treg_M_Cerebellum	Cerebellum	34	M	62	2018-04-30
113	PA113FC39	Saline	Treg	Saline_Treg_M_Frontal Cortex	Frontal Cortex	34	M	62	2018-04-30
113	PA113H39	Saline	Treg	Saline_Treg_M_Hippocampus	Hippocampus	34	M	62	2018-04-30
114	PA114C38	Saline	Treg	Saline_Treg_M_Cerebellum	Cerebellum	34	M	51	2018-04-30
114	PA114FC40	Saline	Treg	Saline_Treg_M_Frontal Cortex	Frontal Cortex	34	M	51	2018-04-30
114	PA114H40	Saline	Treg	Saline_Treg_M_Hippocampus	Hippocampus	34	M	51	2018-04-30
116	PA116C39	PolyIC	Saline	PolyIC_Saline_F_Cerebellum	Cerebellum	35	F	63	2018-04-24
116	PA116FC41	PolyIC	Saline	PolyIC_Saline_F_Frontal Cortex	Frontal Cortex	35	F	63	2018-04-24
116	PA116H41	PolyIC	Saline	PolyIC_Saline_F_Hippocampus	Hippocampus	35	F	63	2018-04-24
118	PA118C40	PolyIC	Saline	PolyIC_Saline_F_Cerebellum	Cerebellum	35	F	52	2018-04-22
118	PA118FC42	PolyIC	Saline	PolyIC_Saline_F_Frontal Cortex	Frontal Cortex	35	F	52	2018-04-22
118	PA118H42	PolyIC	Saline	PolyIC_Saline_F_Hippocampus	Hippocampus	35	F	52	2018-04-22
120	PA120C41	PolyIC	Treg	PolyIC_Treg_F_Cerebellum	Cerebellum	36	F	52	2018-04-22
120	PA120FC43	PolyIC	Treg	PolyIC_Treg_F_Frontal Cortex	Frontal Cortex	36	F	52	2018-04-22
120	PA120H43	PolyIC	Treg	PolyIC_Treg_F_Hippocampus	Hippocampus	36	F	52	2018-04-22
121	PA121C42	PolyIC	Treg	PolyIC_Treg_F_Cerebellum	Cerebellum	36	F	69	2018-04-30
121	PA121FC44	PolyIC	Treg	PolyIC_Treg_F_Frontal Cortex	Frontal Cortex	36	F	69	2018-04-30
121	PA121H44	PolyIC	Treg	PolyIC_Treg_F_Hippocampus	Hippocampus	36	F	69	2018-04-30
126	PA126C43	PolyIC	Treg	PolyIC_Treg_F_Cerebellum	Cerebellum	37	F	85	2018-04-30
126	PA126FC45	PolyIC	Treg	PolyIC_Treg_F_Frontal Cortex	Frontal Cortex	37	F	85	2018-04-30
126	PA126H45	PolyIC	Treg	PolyIC_Treg_F_Hippocampus	Hippocampus	37	F	85	2018-04-30
130	PA130C44	PolyIC	Saline	PolyIC_Saline_F_Cerebellum	Cerebellum	38	F	85	2018-04-30
130	PA130FC46	PolyIC	Saline	PolyIC_Saline_F_Frontal Cortex	Frontal Cortex	38	F	85	2018-04-30
130	PA130H46	PolyIC	Saline	PolyIC_Saline_F_Hippocampus	Hippocampus	38	F	85	2018-04-30
136	PA136C45	PolyIC	Saline	PolyIC_Saline_F_Cerebellum	Cerebellum	40	F	64	2018-04-30
136	PA136FC47	PolyIC	Saline	PolyIC_Saline_F_Frontal Cortex	Frontal Cortex	40	F	64	2018-04-30
136	PA136H47	PolyIC	Saline	PolyIC_Saline_F_Hippocampus	Hippocampus	40	F	64	2018-04-30
138	PA138C46	Saline	Treg	Saline_Treg_F_Cerebellum	Cerebellum	41	F	62	2018-04-30
138	PA138FC48	Saline	Treg	Saline_Treg_F_Frontal Cortex	Frontal Cortex	41	F	62	2018-04-30
138	PA138H48	Saline	Treg	Saline_Treg_F_Hippocampus	Hippocampus	41	F	62	2018-04-30
142	PA142C47	Saline	Treg	Saline_Treg_F_Cerebellum	Cerebellum	42	F	57	2018-05-01
142	PA142FC49	Saline	Treg	Saline_Treg_F_Frontal Cortex	Frontal Cortex	42	F	57	2018-05-01
142	PA142H49	Saline	Treg	Saline_Treg_F_Hippocampus	Hippocampus	42	F	57	2018-05-01
143	PA143C48	Saline	Treg	Saline_Treg_F_Cerebellum	Cerebellum	42	F	59	2018-04-23
143	PA143FC50	Saline	Treg	Saline_Treg_F_Frontal Cortex	Frontal Cortex	42	F	59	2018-04-23
143	PA143H50	Saline	Treg	Saline_Treg_F_Hippocampus	Hippocampus	42	F	59	2018-04-23
145	PA145C49	Saline	Saline	Saline_Saline_F_Cerebellum	Cerebellum	43	F	57	2018-05-01
145	PA145FC51	Saline	Saline	Saline_Saline_F_Frontal Cortex	Frontal Cortex	43	F	57	2018-05-01
149	PA149C50	Saline	Saline	Saline_Saline_F_Cerebellum	Cerebellum	44	F	54	2018-05-08
149	PA149FC52	Saline	Saline	Saline_Saline_F_Frontal Cortex	Frontal Cortex	44	F	54	2018-05-08
149	PA149H52	Saline	Saline	Saline_Saline_F_Hippocampus	Hippocampus	44	F	54	2018-05-08
151	PA151C51	Saline	Saline	Saline_Saline_F_Cerebellum	Cerebellum	45	F	62	2018-04-30
151	PA151FC53	Saline	Saline	Saline_Saline_F_Frontal Cortex	Frontal Cortex	45	F	62	2018-04-30
151	PA151H53	Saline	Saline	Saline_Saline_F_Hippocampus	Hippocampus	45	F	62	2018-04-30
156	PA156C52	Saline	Saline	Saline_Saline_M_Cerebellum	Cerebellum	46	M	57	2018-05-01
156	PA156FC54	Saline	Saline	Saline_Saline_M_Frontal Cortex	Frontal Cortex	46	M	57	2018-05-01
156	PA156H54	Saline	Saline	Saline_Saline_M_Hippocampus	Hippocampus	46	M	57	2018-05-01
158	PA158C53	Saline	Saline	Saline_Saline_M_Cerebellum	Cerebellum	47	M	54	2018-05-08
158	PA158FC55	Saline	Saline	Saline_Saline_M_Frontal Cortex	Frontal Cortex	47	M	54	2018-05-08
158	PA158H55	Saline	Saline	Saline_Saline_M_Hippocampus	Hippocampus	47	M	54	2018-05-08
160	PA160C54	Saline	Saline	Saline_Saline_M_Cerebellum	Cerebellum	47	M	54	2018-05-08
160	PA160FC56	Saline	Saline	Saline_Saline_M_Frontal Cortex	Frontal Cortex	47	M	54	2018-05-08
160	PA160H56	Saline	Saline	Saline_Saline_M_Hippocampus	Hippocampus	47	M	54	2018-05-08
161	PA161C55	Saline	Saline	Saline_Saline_M_Cerebellum	Cerebellum	48	M	51	2018-04-30
161	PA161FC57	Saline	Saline	Saline_Saline_M_Frontal Cortex	Frontal Cortex	48	M	51	2018-04-30
161	PA161H57	Saline	Saline	Saline_Saline_M_Hippocampus	Hippocampus	48	M	51	2018-04-30
163	PA163C56	Saline	Saline	Saline_Saline_M_Cerebellum	Cerebellum	48	M	51	2018-04-30
163	PA163H58	Saline	Saline	Saline_Saline_M_Hippocampus	Hippocampus	48	M	51	2018-04-30
165	PA165C57	PolyIC	Saline	PolyIC_Saline_F_Cerebellum	Cerebellum	49	F	58	2018-04-30
165	PA165FC57	PolyIC	Saline	PolyIC_Saline_F_Frontal Cortex	Frontal Cortex	49	F	58	2018-04-30
165	PA165H59	PolyIC	Saline	PolyIC_Saline_F_Hippocampus	Hippocampus	49	F	58	2018-04-30
170	PA170C58	PolyIC	Saline	PolyIC_Saline_M_Cerebellum	Cerebellum	50	M	63	2018-04-24
170	PA170FC59	PolyIC	Saline	PolyIC_Saline_M_Frontal Cortex	Frontal Cortex	50	M	63	2018-04-24
170	PA170H60	PolyIC	Saline	PolyIC_Saline_M_Hippocampus	Hippocampus	50	M	63	2018-04-24

## Sheet: Cerebellum DEGs
	ensembl_gene_id	chromosome_name	start_position	end_position	mgi_symbol	external_gene_name	description	genelength	logFC_F_PolyIC_salvsTreg	t_F_PolyIC_salvsTreg	P.Value_F_PolyIC_salvsTreg	adj.P.Val_F_PolyIC_salvsTreg	direction_F_PolyIC_salvsTreg	significance_F_PolyIC_salvsTreg	logFC_F_PolyICvsSaline_sal	t_F_PolyICvsSaline_sal	P.Value_F_PolyICvsSaline_sal	adj.P.Val_F_PolyICvsSaline_sal	direction_F_PolyICvsSaline_sal	significance_F_PolyICvsSaline_sal	logFC_F_PolyICvsSaline_Treg	t_F_PolyICvsSaline_Treg	P.Value_F_PolyICvsSaline_Treg	adj.P.Val_F_PolyICvsSaline_Treg	direction_F_PolyICvsSaline_Treg	significance_F_PolyICvsSaline_Treg	logFC_F_Saline_salvsTreg	t_F_Saline_salvsTreg	P.Value_F_Saline_salvsTreg	adj.P.Val_F_Saline_salvsTreg	direction_F_Saline_salvsTreg	significance_F_Saline_salvsTreg	logFC_M_PolyIC_salvsTreg	t_M_PolyIC_salvsTreg	P.Value_M_PolyIC_salvsTreg	adj.P.Val_M_PolyIC_salvsTreg	direction_M_PolyIC_salvsTreg	significance_M_PolyIC_salvsTreg	logFC_M_PolyICvsSaline_sal	t_M_PolyICvsSaline_sal	P.Value_M_PolyICvsSaline_sal	adj.P.Val_M_PolyICvsSaline_sal	direction_M_PolyICvsSaline_sal	significance_M_PolyICvsSaline_sal	logFC_M_PolyICvsSaline_Treg	t_M_PolyICvsSaline_Treg	P.Value_M_PolyICvsSaline_Treg	adj.P.Val_M_PolyICvsSaline_Treg	direction_M_PolyICvsSaline_Treg
1	ENSMUSG00000000001	3	108014596	108053462	Gnai3	Gnai3	guanine nucleotide binding protein (G protein), alpha inhibiting 3 [Source:MGI Symbol;Acc:MGI:95773]	38866	0.116916	0.34045	0.734631	0.986466	Increase	nonDE	0.200096	0.540253	0.590894	0.951194	Increase	nonDE	-0.369198	-1.0943	0.277917	0.739668	Decrease	nonDE	0.68621	1.86632	0.0665712	0.659766	Increase	nonDE	0.535262	1.59534	0.115555	0.999557	Increase	nonDE	-0.0842905	-0.227319	0.820899	0.995051	Decrease	nonDE	-0.185829	-0.542656	0.589248	0.798974	Decrease
2	ENSMUSG00000000028	16	18599197	18630737	Cdc45	Cdc45	cell division cycle 45 [Source:MGI Symbol;Acc:MGI:1338073]	31540	0.721642	1.42945	0.157728	0.914925	Increase	nonDE	0.20867	0.373644	0.709902	0.968947	Increase	nonDE	0.608478	1.16709	0.247495	0.719873	Increase	nonDE	0.321834	0.557094	0.579403	0.874091	Increase	nonDE	0.748431	1.42133	0.160066	0.999557	Increase	nonDE	-1.10688	-2.07867	0.0416544	0.781166	Decrease	nonDE	-0.0537597	-0.101131	0.919762	0.967978	Decrease
3	ENSMUSG00000000031	7	142129266	142131880	H19	H19	H19, imprinted maternally expressed transcript [Source:MGI Symbol;Acc:MGI:95891]	2614	0.134048	0.244295	0.807783	0.989901	Increase	nonDE	0.148724	0.255848	0.798887	0.980216	Increase	nonDE	1.05859	1.78325	0.0792787	0.590857	Increase	nonDE	-0.775818	-1.23439	0.221563	0.717424	Decrease	nonDE	0.487271	0.885665	0.379108	0.999557	Increase	nonDE	-0.216108	-0.368254	0.713896	0.992561	Decrease	nonDE	-0.261911	-0.471938	0.638574	0.828662	Decrease
4	ENSMUSG00000000056	11	121128079	121146682	Narf	Narf	nuclear prelamin A recognition factor [Source:MGI Symbol;Acc:MGI:1914858]	18603	-0.0192781	-0.113048	0.910346	0.994099	Decrease	nonDE	0.25107	1.36637	0.176595	0.875981	Increase	nonDE	0.467747	2.39524	0.0195405	0.489965	Increase	nonDE	-0.235954	-1.13241	0.261678	0.738956	Decrease	nonDE	-0.0536341	-0.339055	0.735676	0.999557	Decrease	nonDE	-0.168212	-1.02722	0.308178	0.947522	Decrease	nonDE	0.106667	0.610497	0.543691	0.768539	Increase
5	ENSMUSG00000000058	6	17281184	17289114	Cav2	Cav2	caveolin 2 [Source:MGI Symbol;Acc:MGI:107571]	7930	-0.0344763	-0.105964	0.915942	0.994099	Decrease	nonDE	-0.0973896	-0.291542	0.771578	0.976804	Decrease	nonDE	0.0525925	0.152583	0.879206	0.970347	Increase	nonDE	-0.184458	-0.518681	0.605769	0.88336	Decrease	nonDE	-0.380055	-1.32976	0.188309	0.999557	Decrease	nonDE	-0.208696	-0.749409	0.456351	0.975671	Decrease	nonDE	0.259119	0.733946	0.465657	0.716357	Increase
6	ENSMUSG00000000078	13	5911481	5920393	Klf6	Klf6	Kruppel-like factor 6 [Source:MGI Symbol;Acc:MGI:1346318]	8912	0.0508576	0.435841	0.664416	0.977938	Increase	nonDE	-0.140985	-1.16894	0.246754	0.895825	Decrease	nonDE	0.0354372	0.289943	0.772795	0.944623	Increase	nonDE	-0.125564	-0.989057	0.326353	0.765716	Decrease	nonDE	0.0527833	0.494989	0.6223	0.999557	Increase	nonDE	-0.0568667	-0.50669	0.61411	0.986248	Decrease	nonDE	0.07785	0.679063	0.499542	0.740257	Increase
7	ENSMUSG00000000085	4	120262478	120387383	Scmh1	Scmh1	sex comb on midleg homolog 1 [Source:MGI Symbol;Acc:MGI:1352762]	124905	-0.00816398	-0.0409411	0.96747	0.995676	Decrease	nonDE	-0.0960031	-0.466427	0.64249	0.959124	Decrease	nonDE	-0.0127023	-0.0594422	0.952785	0.989099	Decrease	nonDE	-0.0914648	-0.413176	0.680856	0.912513	Decrease	nonDE	-0.172467	-0.982537	0.329528	0.999557	Decrease	nonDE	0.162737	0.869413	0.387864	0.962487	Increase	nonDE	-0.0458436	-0.235177	0.814821	0.92278	Decrease
8	ENSMUSG00000000088	9	57428557	57439709	Cox5a	Cox5a	cytochrome c oxidase subunit 5A [Source:MGI Symbol;Acc:MGI:88474]	11152	0.0430385	0.405869	0.68619	0.981934	Increase	nonDE	-0.0497039	-0.451526	0.653134	0.961104	Decrease	nonDE	-0.126127	-1.15865	0.250896	0.721466	Decrease	nonDE	0.119462	1.05075	0.297319	0.752803	Increase	nonDE	0.110634	1.09908	0.275844	0.999557	Increase	nonDE	-0.166018	-1.5802	0.118982	0.866124	Decrease	nonDE	0.16601	1.53143	0.130582	0.396555	Increase
9	ENSMUSG00000000093	11	85723377	85732774	Tbx2	Tbx2	T-box 2 [Source:MGI Symbol;Acc:MGI:98494]	9397	0.209169	0.422571	0.674022	0.97841	Increase	nonDE	-0.324818	-0.637221	0.526249	0.937012	Decrease	nonDE	-0.194533	-0.383556	0.702576	0.920709	Decrease	nonDE	0.078884	0.150033	0.881209	0.966844	Increase	nonDE	-0.467158	-0.976864	0.332308	0.999557	Decrease	nonDE	0.670608	1.34182	0.184386	0.899859	Increase	nonDE	-0.518748	-1.04014	0.302179	0.585092	Decrease
10	ENSMUSG00000000103	Y	2106015	2170409	Zfy2	Zfy2	zinc finger protein 2, Y-linked [Source:MGI Symbol;Acc:MGI:99213]	64394	-0.349383	-0.565403	0.575113	0.972241	Decrease	nonDE	0.20599	0.323406	0.748155	0.975541	Increase	nonDE	-0.462417	-0.72738	0.471437	0.830764	Decrease	nonDE	0.319024	0.483775	0.631313	0.894185	Increase	nonDE	0.786253	1.36925	0.178936	0.999557	Increase	nonDE	-0.285639	-0.469835	0.641149	0.98961	Decrease	nonDE	0.0414421	0.0710461	0.943732	0.977682	Increase
11	ENSMUSG00000000120	11	95459644	95478561	Ngfr	Ngfr	nerve growth factor receptor (TNFR superfamily, member 16) [Source:MGI Symbol;Acc:MGI:97323]	18917	-0.28299	-0.491436	0.624796	0.974913	Decrease	nonDE	-0.310388	-0.540166	0.590954	0.951194	Decrease	nonDE	-0.00583586	-0.00961994	0.992354	0.998385	Decrease	nonDE	-0.587542	-0.962647	0.339341	0.770561	Decrease	nonDE	0.52715	0.961037	0.340144	0.999557	Increase	nonDE	-0.23149	-0.395294	0.693938	0.99144	Decrease	nonDE	0.30055	0.525474	0.601066	0.806433	Increase
12	ENSMUSG00000000125	11	103664976	103708783	Wnt3	Wnt3	wingless-type MMTV integration site family, member 3 [Source:MGI Symbol;Acc:MGI:98955]	43807	-0.119249	-0.701485	0.485539	0.959726	Decrease	nonDE	-0.0340958	-0.195051	0.84597	0.985587	Decrease	nonDE	0.0986725	0.535205	0.59436	0.87923	Increase	nonDE	-0.252018	-1.32476	0.189954	0.702639	Decrease	nonDE	-0.021579	-0.141373	0.888019	0.999557	Decrease	nonDE	0.131228	0.796896	0.428453	0.969845	Increase	nonDE	0.167587	0.98787	0.32693	0.608417	Increase
13	ENSMUSG00000000127	17	64170057	64446491	Fer	Fer	fer (fms/fps related) protein kinase [Source:MGI Symbol;Acc:MGI:105917]	276434	-0.0474412	-0.270962	0.78729	0.986922	Decrease	nonDE	0.142973	0.771366	0.443323	0.929096	Increase	nonDE	0.264244	1.37809	0.172965	0.678771	Increase	nonDE	-0.168712	-0.832579	0.408173	0.805265	Decrease	nonDE	-0.114137	-0.679125	0.499503	0.999557	Decrease	nonDE	-0.222613	-1.29787	0.198981	0.907278	Decrease	nonDE	-0.217139	-1.19377	0.236967	0.521693	Decrease
14	ENSMUSG00000000131	7	125700887	125799673	Xpo6	Xpo6	exportin 6 [Source:MGI Symbol;Acc:MGI:2429950]	98786	-0.0235824	-0.120606	0.90438	0.994099	Decrease	nonDE	0.289876	1.36062	0.178399	0.876035	Increase	nonDE	0.182685	0.84336	0.402162	0.799992	Increase	nonDE	0.083608	0.35699	0.722272	0.923837	Increase	nonDE	0.142807	0.755907	0.452473	0.999557	Increase	nonDE	0.134196	0.643343	0.522296	0.979776	Increase	nonDE	-0.175959	-0.88688	0.378458	0.653502	Decrease
15	ENSMUSG00000000134	X	7628799	7641441	Tfe3	Tfe3	transcription factor E3 [Source:MGI Symbol;Acc:MGI:98511]	12642	0.224386	1.53757	0.129074	0.914925	Increase	nonDE	-0.145449	-0.946568	0.347412	0.913265	Decrease	nonDE	0.350461	2.23638	0.0288128	0.521489	Increase	nonDE	-0.271524	-1.64412	0.105046	0.670439	Decrease	nonDE	-0.123646	-0.935368	0.353108	0.999557	Decrease	nonDE	0.0672044	0.48205	0.631412	0.989099	Increase	nonDE	0.206175	1.37238	0.174728	0.452393	Increase
16	ENSMUSG00000000142	11	108811175	108841609	Axin2	Axin2	axin 2 [Source:MGI Symbol;Acc:MGI:1270862]	30434	-0.0911142	-0.290407	0.772442	0.986803	Decrease	nonDE	0.00872667	0.0270475	0.978506	0.998082	Increase	nonDE	-0.627435	-2.07915	0.0416079	0.540815	Decrease	nonDE	0.545047	1.73762	0.0870796	0.662143	Increase	nonDE	0.154932	0.559026	0.578091	0.999557	Increase	nonDE	0.0275394	0.0920101	0.926977	0.999888	Increase	nonDE	-0.102984	-0.339395	0.735421	0.882628	Decrease
17	ENSMUSG00000000148	5	140690766	140705134	Brat1	Brat1	BRCA1-associated ATM activator 1 [Source:MGI Symbol;Acc:MGI:1891679]	14368	-0.83518	-1.91469	0.0599952	0.914925	Decrease	nonDE	0.507911	1.15744	0.251388	0.896322	Increase	nonDE	-0.361141	-0.762699	0.44844	0.820628	Decrease	nonDE	0.0338728	0.0706262	0.943915	0.986938	Increase	nonDE	0.410919	1.02502	0.309204	0.999557	Increase	nonDE	-0.351682	-0.826586	0.411537	0.965421	Decrease	nonDE	0.939104	2.09467	0.0401567	0.234645	Increase
18	ENSMUSG00000000149	5	140744163	140816186	Gna12	Gna12	guanine nucleotide binding protein, alpha 12 [Source:MGI Symbol;Acc:MGI:95767]	72023	0.00784741	0.0247397	0.980339	0.996967	Increase	nonDE	0.0385624	0.115426	0.908468	0.990714	Increase	nonDE	-0.252667	-0.787425	0.433934	0.81526	Decrease	nonDE	0.299077	0.878974	0.382698	0.796153	Increase	nonDE	0.108649	0.362825	0.717929	0.999557	Increase	nonDE	-0.287804	-0.927462	0.357165	0.955656	Decrease	nonDE	-0.300935	-0.957593	0.341865	0.621358	Decrease
19	ENSMUSG00000000154	7	143027473	143053071	Slc22a18	Slc22a18	solute carrier family 22 (organic cation transporter), member 18 [Source:MGI Symbol;Acc:MGI:1336884]	25598	0.117542	0.242564	0.809117	0.989901	Increase	nonDE	0.876981	1.68821	0.0962301	0.857116	Increase	nonDE	0.268116	0.531091	0.597191	0.880544	Increase	nonDE	0.726408	1.33896	0.185313	0.699596	Increase	nonDE	0.194471	0.390761	0.69727	0.999557	Increase	nonDE	0.156824	0.300864	0.764492	0.992561	Increase	nonDE	-0.632489	-1.25482	0.214097	0.496023	Decrease
20	ENSMUSG00000000159	16	96162868	96223321	Igsf5	Igsf5	immunoglobulin superfamily, member 5 [Source:MGI Symbol;Acc:MGI:1919308]	60453	-0.542687	-1.01343	0.314662	0.928609	Decrease	nonDE	-0.314411	-0.581055	0.56324	0.946285	Decrease	nonDE	-0.674302	-1.22332	0.225684	0.705499	Decrease	nonDE	-0.182795	-0.325726	0.745692	0.932146	Decrease	nonDE	0.253814	0.477459	0.634659	0.999557	Increase	nonDE	-0.992415	-1.84625	0.0694721	0.826898	Decrease	nonDE	-0.190843	-0.349569	0.727808	0.87839	Decrease
21	ENSMUSG00000000167	9	50528621	50536300	Pih1d2	Pih1d2	PIH1 domain containing 2 [Source:MGI Symbol;Acc:MGI:1919864]	7679	0.359296	0.703726	0.484151	0.959726	Increase	nonDE	-0.111813	-0.202659	0.840043	0.984929	Decrease	nonDE	0.0770428	0.14913	0.881919	0.970602	Increase	nonDE	0.17044	0.303474	0.762511	0.937465	Increase	nonDE	-0.626928	-1.25189	0.215158	0.999557	Decrease	nonDE	-0.0951548	-0.195849	0.845348	0.995883	Decrease	nonDE	-0.553901	-1.02948	0.307122	0.589763	Decrease
22	ENSMUSG00000000168	9	50545933	50571080	Dlat	Dlat	dihydrolipoamide S-acetyltransferase (E2 component of pyruvate dehydrogenase complex) [Source:MGI Symbol;Acc:MGI:2385311]	25147	-0.0676507	-0.666285	0.507619	0.962951	Decrease	nonDE	0.0634744	0.600602	0.550222	0.942808	Increase	nonDE	-0.00759852	-0.0713392	0.94335	0.986733	Decrease	nonDE	0.00342222	0.0307383	0.975574	0.99606	Increase	nonDE	-0.187715	-1.93583	0.0573003	0.999557	Decrease	nonDE	-0.047369	-0.473451	0.637499	0.98925	Decrease	nonDE	-0.0422431	-0.401776	0.689185	0.858574	Decrease
23	ENSMUSG00000000171	9	50507657	50515112	Sdhd	Sdhd	succinate dehydrogenase complex, subunit D, integral membrane protein [Source:MGI Symbol;Acc:MGI:1914175]	7455	0.0150983	0.0429574	0.965869	0.995525	Increase	nonDE	0.327119	0.851913	0.397433	0.917766	Increase	nonDE	-0.263654	-0.768703	0.444892	0.818389	Decrease	nonDE	0.605872	1.59782	0.115001	0.674283	Increase	nonDE	0.00486644	0.0149194	0.988143	0.999557	Increase	nonDE	0.266191	0.736856	0.463897	0.975671	Increase	nonDE	-0.172255	-0.491027	0.625084	0.820025	Decrease
24	ENSMUSG00000000183	6	126992549	127005150	Fgf6	Fgf6	fibroblast growth factor 6 [Source:MGI Symbol;Acc:MGI:95520]	12601	-0.547102	-0.900866	0.371031	0.944702	Decrease	nonDE	0.482414	0.76848	0.445023	0.929096	Increase	nonDE	-0.846063	-1.3764	0.173487	0.679095	Decrease	nonDE	0.781375	1.22082	0.226625	0.719083	Increase	nonDE	0.360936	0.5621	0.576007	0.999557	Increase	nonDE	-0.11291	-0.168794	0.86649	0.995883	Decrease	nonDE	-0.954397	-1.48877	0.14145	0.41134	Decrease
25	ENSMUSG00000000184	6	127102125	127129156	Ccnd2	Ccnd2	cyclin D2 [Source:MGI Symbol;Acc:MGI:88314]	27031	0.102311	0.545807	0.587092	0.973503	Increase	nonDE	-0.210443	-1.09098	0.279363	0.90163	Decrease	nonDE	0.0523931	0.266967	0.790352	0.949885	Increase	nonDE	-0.160525	-0.790614	0.432084	0.815362	Decrease	nonDE	0.164948	0.929156	0.356293	0.999557	Increase	nonDE	-0.342185	-1.86101	0.0673287	0.821595	Decrease	nonDE	0.117594	0.617101	0.539353	0.76625	Increase
26	ENSMUSG00000000194	2	31042328	31108787	Gpr107	Gpr107	G protein-coupled receptor 107 [Source:MGI Symbol;Acc:MGI:2139054]	66459	-0.282228	-1.76297	0.08267	0.914925	Decrease	nonDE	0.47561	2.76533	0.00741837	0.857116	Increase	nonDE	0.369	1.99388	0.0504223	0.554772	Increase	nonDE	-0.175618	-0.892323	0.375556	0.793199	Decrease	nonDE	0.0782576	0.513157	0.609605	0.999557	Increase	nonDE	-0.056877	-0.34945	0.727897	0.992561	Decrease	nonDE	0.1514	0.898635	0.372209	0.647852	Increase
27	ENSMUSG00000000197	14	123514046	123864556	Nalcn	Nalcn	sodium leak channel, non-selective [Source:MGI Symbol;Acc:MGI:2444306]	350510	0.0193551	0.139051	0.889846	0.994099	Increase	nonDE	0.299471	2.00059	0.0496745	0.857116	Increase	nonDE	0.0640347	0.436919	0.663638	0.906629	Increase	nonDE	0.254792	1.61526	0.111165	0.671311	Increase	nonDE	-0.103006	-0.775477	0.440909	0.999557	Decrease	nonDE	0.0889629	0.635965	0.527063	0.979776	Increase	nonDE	-0.14102	-0.987773	0.326976	0.608417	Decrease
28	ENSMUSG00000000202	11	114682043	114686771	Btbd17	Btbd17	BTB (POZ) domain containing 17 [Source:MGI Symbol;Acc:MGI:1919264]	4728	-0.045832	-0.210653	0.833826	0.990018	Decrease	nonDE	0.00317905	0.0140114	0.988864	0.998292	Increase	nonDE	0.28131	1.18012	0.242311	0.715919	Increase	nonDE	-0.323963	-1.30242	0.197433	0.706665	Decrease	nonDE	-0.0220333	-0.112474	0.910799	0.999557	Decrease	nonDE	-0.106984	-0.525066	0.601348	0.984457	Decrease	nonDE	0.160506	0.746168	0.458293	0.711401	Increase
29	ENSMUSG00000000214	7	142446489	142484865	Th	Th	tyrosine hydroxylase [Source:MGI Symbol;Acc:MGI:98735]	38376	-0.100951	-0.283397	0.777785	0.986803	Decrease	nonDE	0.321411	0.813004	0.419224	0.924801	Increase	nonDE	0.106046	0.276405	0.783126	0.947954	Increase	nonDE	0.114415	0.270324	0.787779	0.94587	Increase	nonDE	-0.125117	-0.362272	0.71834	0.999557	Decrease	nonDE	0.0180244	0.0483293	0.961604	0.999888	Increase	nonDE	-0.483884	-1.38105	0.172058	0.449701	Decrease
30	ENSMUSG00000000216	7	121333702	121367698	Scnn1g	Scnn1g	sodium channel, nonvoltage-gated 1 gamma [Source:MGI Symbol;Acc:MGI:104695]	33996	-0.669077	-1.35326	0.180723	0.914925	Decrease	nonDE	0.421038	0.830274	0.409465	0.923439	Increase	nonDE	-0.760788	-1.49251	0.140469	0.653592	Decrease	nonDE	0.512749	0.974365	0.333537	0.767371	Increase	nonDE	0.334273	0.703414	0.484344	0.999557	Increase	nonDE	-0.430854	-0.874353	0.385189	0.962487	Decrease	nonDE	-0.403502	-0.842238	0.402785	0.671631	Decrease
31	ENSMUSG00000000223	X	133305300	133357322	Drp2	Drp2	dystrophin related protein 2 [Source:MGI Symbol;Acc:MGI:107432]	52022	-0.232355	-1.2363	0.220858	0.91505	Decrease	nonDE	-0.172635	-0.922099	0.359934	0.915416	Decrease	nonDE	-0.00421878	-0.0206317	0.983604	0.997674	Decrease	nonDE	-0.400772	-1.95127	0.0553965	0.659766	Decrease	nonDE	-0.191894	-1.10423	0.273618	0.999557	Decrease	nonDE	0.0587774	0.321587	0.748811	0.992561	Increase	nonDE	0.12668	0.634799	0.527818	0.7585	Increase
32	ENSMUSG00000000244	7	142558783	142573381	Tspan32	Tspan32	tetraspanin 32 [Source:MGI Symbol;Acc:MGI:1350360]	14598	-0.913176	-1.28269	0.204219	0.914925	Decrease	nonDE	1.25992	1.6881	0.0962514	0.857116	Increase	nonDE	-0.954775	-1.30007	0.198231	0.688533	Decrease	nonDE	1.30152	1.68189	0.097454	0.666511	Increase	nonDE	-0.139958	-0.188685	0.850936	0.999557	Decrease	nonDE	-0.143772	-0.18861	0.850994	0.995883	Decrease	nonDE	-1.33813	-1.81467	0.0742522	0.305665	Decrease
33	ENSMUSG00000000247	2	38229293	38259745	Lhx2	Lhx2	LIM homeobox protein 2 [Source:MGI Symbol;Acc:MGI:96785]	30452	-0.476948	-0.705333	0.483157	0.959726	Decrease	nonDE	0.0479876	0.0697587	0.944603	0.995038	Increase	nonDE	0.024293	0.0340976	0.972905	0.995517	Increase	nonDE	-0.453254	-0.621497	0.536476	0.858431	Decrease	nonDE	0.0641382	0.0960394	0.923789	0.999557	Increase	nonDE	-0.716966	-1.07283	0.28737	0.942772	Decrease	nonDE	0.401287	0.565412	0.573767	0.787588	Increase
34	ENSMUSG00000000253	13	45660920	45707276	Gmpr	Gmpr	guanosine monophosphate reductase [Source:MGI Symbol;Acc:MGI:1913605]	46356	-0.056885	-0.378758	0.706119	0.984936	Decrease	nonDE	-0.0521815	-0.334731	0.738921	0.973429	Decrease	nonDE	-0.130431	-0.838238	0.405011	0.801497	Decrease	nonDE	0.0213649	0.131573	0.895734	0.971316	Increase	nonDE	-0.302933	-2.16516	0.0341028	0.999557	Decrease	nonDE	-0.0422667	-0.296009	0.76818	0.992561	Decrease	nonDE	-0.625833	-4.30383	5.85727e-05	0.0252795	Decrease
35	ENSMUSG00000000263	11	55405064	55499024	Glra1	Glra1	glycine receptor, alpha 1 subunit [Source:MGI Symbol;Acc:MGI:95747]	93960	-0.256207	-0.550521	0.583875	0.973503	Decrease	nonDE	-0.418296	-0.949306	0.34603	0.913262	Decrease	nonDE	-0.524699	-1.10551	0.27307	0.737817	Decrease	nonDE	-0.149804	-0.329727	0.742681	0.93029	Decrease	nonDE	0.677013	1.50193	0.138024	0.999557	Increase	nonDE	-0.66053	-1.39508	0.167805	0.89624	Decrease	nonDE	0.917555	1.73892	0.0868484	0.32856	Increase
36	ENSMUSG00000000266	X	139565348	139668464	Mid2	Mid2	midline 2 [Source:MGI Symbol;Acc:MGI:1344333]	103116	-0.130469	-0.40493	0.686877	0.981934	Decrease	nonDE	0.268985	0.778491	0.439143	0.929096	Increase	nonDE	-0.411158	-1.26973	0.208771	0.694012	Decrease	nonDE	0.549674	1.57163	0.120959	0.674283	Increase	nonDE	0.341693	1.08415	0.282357	0.999557	Increase	nonDE	-0.0165486	-0.0469012	0.962738	0.999888	Decrease	nonDE	-0.0382752	-0.113467	0.910015	0.963531	Decrease
37	ENSMUSG00000000275	11	88890202	88911119	Trim25	Trim25	tripartite motif-containing 25 [Source:MGI Symbol;Acc:MGI:102749]	20917	-0.147197	-0.45155	0.653117	0.975948	Decrease	nonDE	0.153912	0.449907	0.654295	0.961104	Increase	nonDE	0.0590355	0.166352	0.868403	0.968561	Increase	nonDE	-0.052321	-0.140462	0.888735	0.969522	Decrease	nonDE	-0.192134	-0.613796	0.541522	0.999557	Decrease	nonDE	0.328492	0.965461	0.337941	0.951231	Increase	nonDE	-0.374375	-1.13224	0.261751	0.545954	Decrease
38	ENSMUSG00000000276	11	88926005	88957676	Dgke	Dgke	diacylglycerol kinase, epsilon [Source:MGI Symbol;Acc:MGI:1889276]	31671	0.111172	0.889352	0.377138	0.945006	Increase	nonDE	0.00994443	0.0755965	0.939976	0.994663	Increase	nonDE	0.244712	1.83805	0.0706878	0.581864	Increase	nonDE	-0.123596	-0.880615	0.381815	0.795932	Decrease	nonDE	0.0852789	0.736005	0.464412	0.999557	Increase	nonDE	0.0893922	0.72127	0.473365	0.975671	Increase	nonDE	0.333119	2.61534	0.0111005	0.139084	Increase
39	ENSMUSG00000000278	11	88814846	88846291	Scpep1	Scpep1	serine carboxypeptidase 1 [Source:MGI Symbol;Acc:MGI:1921867]	31445	0.306115	1.5738	0.120456	0.914925	Increase	nonDE	-0.414027	-2.07424	0.0420768	0.857116	Decrease	nonDE	0.380032	1.83928	0.0705041	0.581864	Increase	nonDE	-0.487944	-2.29035	0.0252999	0.659766	Decrease	nonDE	-0.0801605	-0.470414	0.639656	0.999557	Decrease	nonDE	0.262269	1.41945	0.16061	0.892423	Increase	nonDE	-0.0246774	-0.133136	0.894503	0.957303	Decrease
40	ENSMUSG00000000282	11	74721746	74736551	Mnt	Mnt	max binding protein [Source:MGI Symbol;Acc:MGI:109150]	14805	0.289311	1.45316	0.151055	0.914925	Increase	nonDE	-0.212636	-1.02121	0.310991	0.907555	Decrease	nonDE	0.165578	0.811413	0.420131	0.807513	Increase	nonDE	-0.0889027	-0.414186	0.68012	0.912513	Decrease	nonDE	0.081907	0.500172	0.618666	0.999557	Increase	nonDE	0.372639	2.00589	0.0490911	0.795049	Increase	nonDE	0.589859	3.02322	0.00359309	0.0906455	Increase
41	ENSMUSG00000000290	10	77366086	77401542	Itgb2	Itgb2	integrin beta 2 [Source:MGI Symbol;Acc:MGI:96611]	35456	-0.032118	-0.0552047	0.956147	0.995525	Decrease	nonDE	-0.139391	-0.233666	0.815989	0.983237	Decrease	nonDE	-0.620476	-1.06304	0.291751	0.748316	Decrease	nonDE	0.448967	0.744176	0.459489	0.825212	Increase	nonDE	0.811041	1.41339	0.162378	0.999557	Increase	nonDE	-0.926233	-1.55961	0.123775	0.866124	Decrease	nonDE	0.208222	0.354698	0.72398	0.876994	Increase
42	ENSMUSG00000000295	10	31189379	31204200	Hddc2	Hddc2	HD domain containing 2 [Source:MGI Symbol;Acc:MGI:1916942]	14821	-0.098422	-0.21379	0.831389	0.98991	Decrease	nonDE	-0.126183	-0.268696	0.789026	0.979358	Decrease	nonDE	0.0278591	0.0579053	0.954004	0.98959	Increase	nonDE	-0.252464	-0.511208	0.610961	0.885801	Decrease	nonDE	0.079957	0.177219	0.859895	0.999557	Increase	nonDE	-0.749496	-1.67556	0.0986945	0.849523	Decrease	nonDE	-0.82319	-1.87968	0.0646965	0.287935	Decrease
43	ENSMUSG00000000296	10	31208372	31321954	Tpd52l1	Tpd52l1	tumor protein D52-like 1 [Source:MGI Symbol;Acc:MGI:1298386]	113582	-0.125245	-0.44698	0.656395	0.976798	Decrease	nonDE	0.762621	2.32617	0.0231828	0.857116	Increase	nonDE	-0.412796	-1.47469	0.145189	0.657747	Decrease	nonDE	1.05017	3.18291	0.00224961	0.659766	Increase	nonDE	0.484866	1.68699	0.0964653	0.999557	Increase	nonDE	-0.594414	-1.98412	0.0515259	0.795049	Decrease	nonDE	-0.359938	-1.29389	0.200346	0.482653	Decrease
44	ENSMUSG00000000301	11	59861440	59937315	Pemt	Pemt	phosphatidylethanolamine N-methyltransferase [Source:MGI Symbol;Acc:MGI:104535]	75875	0.129667	0.230052	0.818783	0.989901	Increase	nonDE	-0.214595	-0.369104	0.713266	0.969037	Decrease	nonDE	-0.244727	-0.425382	0.671983	0.910967	Decrease	nonDE	0.159798	0.267449	0.789982	0.946262	Increase	nonDE	-0.484356	-0.8675	0.388903	0.999557	Decrease	nonDE	-0.407524	-0.728031	0.469245	0.975671	Decrease	nonDE	-0.528162	-0.906518	0.368056	0.644072	Decrease
45	ENSMUSG00000000303	8	107329983	107396878	Cdh1	Cdh1	cadherin 1 [Source:MGI Symbol;Acc:MGI:88354]	66895	-0.0118833	-0.0677673	0.946182	0.995429	Decrease	nonDE	0.0351583	0.190467	0.849545	0.985587	Increase	nonDE	0.262427	1.3669	0.17643	0.680092	Increase	nonDE	-0.239152	-1.18432	0.240659	0.725511	Decrease	nonDE	-0.165538	-0.994173	0.323876	0.999557	Decrease	nonDE	-0.455808	-2.78125	0.00710197	0.721732	Decrease	nonDE	-0.558481	-3.25659	0.00180384	0.0709797	Decrease
46	ENSMUSG00000000305	2	179084224	179541166	Cdh4	Cdh4	cadherin 4 [Source:MGI Symbol;Acc:MGI:99218]	456942	0.0464566	0.322304	0.748271	0.986466	Increase	nonDE	0.0760257	0.498454	0.61987	0.958004	Increase	nonDE	0.138366	0.901233	0.370837	0.786796	Increase	nonDE	-0.0158839	-0.0976616	0.922506	0.979725	Decrease	nonDE	-0.0260658	-0.196954	0.844487	0.999557	Decrease	nonDE	-0.031131	-0.222889	0.824331	0.995216	Decrease	nonDE	0.245262	1.62598	0.108859	0.363751	Increase
47	ENSMUSG00000000308	2	121188195	121194218	Ckmt1	Ckmt1	creatine kinase, mitochondrial 1, ubiquitous [Source:MGI Symbol;Acc:MGI:99441]	6023	-0.0404518	-0.307948	0.75912	0.986466	Decrease	nonDE	-0.112573	-0.833623	0.407588	0.92247	Decrease	nonDE	-0.102063	-0.750434	0.455738	0.823557	Decrease	nonDE	-0.0509626	-0.362273	0.718339	0.922895	Decrease	nonDE	-0.057122	-0.461996	0.645648	0.999557	Decrease	nonDE	-0.160009	-1.25305	0.214739	0.918756	Decrease	nonDE	0.00238503	0.0179722	0.985717	0.994967	Increase
48	ENSMUSG00000000317	11	70114954	70120624	Bcl6b	Bcl6b	B cell CLL/lymphoma 6, member B [Source:MGI Symbol;Acc:MGI:1278332]	5670	-0.712949	-1.52564	0.132016	0.914925	Decrease	nonDE	-0.0225547	-0.0487871	0.961241	0.997115	Decrease	nonDE	-0.550442	-1.13024	0.262584	0.731337	Decrease	nonDE	-0.185062	-0.38065	0.704721	0.917965	Decrease	nonDE	0.282955	0.618737	0.538281	0.999557	Increase	nonDE	0.729305	1.45281	0.151154	0.89229	Increase	nonDE	0.764156	1.55286	0.125378	0.389601	Increase
49	ENSMUSG00000000318	11	70047023	70061660	Clec10a	Clec10a	C-type lectin domain family 10, member A [Source:MGI Symbol;Acc:MGI:96975]	14637	-0.981542	-2.19357	0.0318985	0.914925	Decrease	nonDE	0.301102	0.692135	0.491351	0.933225	Increase	nonDE	-0.681187	-1.41662	0.161435	0.670364	Decrease	nonDE	0.000747526	0.00158014	0.998744	0.999683	Increase	nonDE	0.117321	0.253227	0.800903	0.999557	Increase	nonDE	-0.13613	-0.276281	0.783221	0.992561	Decrease	nonDE	-0.0267737	-0.0551776	0.956169	0.983219	Decrease
50	ENSMUSG00000000320	11	70132283	70146179	Alox12	Alox12	arachidonate 12-lipoxygenase [Source:MGI Symbol;Acc:MGI:87998]	13896	-0.545656	-1.02205	0.310599	0.925905	Decrease	nonDE	0.00962142	0.0177095	0.985926	0.998292	Increase	nonDE	-0.31709	-0.572386	0.569062	0.870097	Decrease	nonDE	-0.218944	-0.385757	0.700954	0.917177	Decrease	nonDE	-0.0162191	-0.0315844	0.974902	0.999557	Decrease	nonDE	0.0344994	0.0647476	0.948576	0.999888	Increase	nonDE	0.307517	0.568979	0.571358	0.785896	Increase
51	ENSMUSG00000000326	16	18225636	18245602	Comt	Comt	catechol-O-methyltransferase [Source:MGI Symbol;Acc:MGI:88470]	19966	-0.0683981	-0.306587	0.760151	0.986466	Decrease	nonDE	-0.00467301	-0.0200177	0.984091	0.998292	Decrease	nonDE	-0.36728	-1.64974	0.103888	0.618244	Decrease	nonDE	0.294209	1.25257	0.214912	0.714976	Increase	nonDE	-0.089532	-0.456259	0.649746	0.999557	Decrease	nonDE	-0.345492	-1.74534	0.0857166	0.838748	Decrease	nonDE	-0.121791	-0.570168	0.570556	0.785368	Decrease
52	ENSMUSG00000000339	3	116282612	116301857	Rtca	Rtca	RNA 3'-terminal phosphate cyclase [Source:MGI Symbol;Acc:MGI:1913618]	19245	0.329316	2.08888	0.0406927	0.914925	Increase	nonDE	-0.222828	-1.35043	0.181625	0.878309	Decrease	nonDE	0.178085	1.08726	0.28099	0.741997	Increase	nonDE	-0.0715976	-0.415768	0.678968	0.912471	Decrease	nonDE	0.209934	1.51401	0.134937	0.999557	Increase	nonDE	-0.207641	-1.42078	0.160225	0.892423	Decrease	nonDE	0.304646	1.98958	0.0509058	0.258731	Increase
53	ENSMUSG00000000340	3	116306719	116343630	Dbt	Dbt	dihydrolipoamide branched chain transacylase E2 [Source:MGI Symbol;Acc:MGI:105386]	36911	0.16746	0.628483	0.53192	0.964584	Increase	nonDE	0.051136	0.178236	0.859099	0.985587	Increase	nonDE	-0.470756	-1.86502	0.0667552	0.581864	Decrease	nonDE	0.689352	2.49627	0.0151322	0.659766	Increase	nonDE	0.127257	0.512575	0.61001	0.999557	Increase	nonDE	-0.0791375	-0.299115	0.76582	0.992561	Decrease	nonDE	-0.425228	-1.69351	0.0952116	0.343867	Decrease
54	ENSMUSG00000000346	15	100513230	100518642	Dazap2	Dazap2	DAZ associated protein 2 [Source:MGI Symbol;Acc:MGI:1344344]	5412	0.00738108	0.0856334	0.932025	0.995121	Increase	nonDE	0.0235025	0.261506	0.794541	0.979581	Increase	nonDE	-0.0536441	-0.601303	0.549758	0.863561	Decrease	nonDE	0.0845277	0.904021	0.369368	0.788465	Increase	nonDE	0.0395193	0.486317	0.6284	0.999557	Increase	nonDE	-0.0568225	-0.666959	0.507192	0.979632	Decrease	nonDE	-0.149808	-1.75238	0.0844885	0.324074	Decrease
55	ENSMUSG00000000355	X	37689455	37702303	Mcts1	Mcts1	malignant T cell amplified sequence 1 [Source:MGI Symbol;Acc:MGI:1916245]	12848	-0.0882484	-0.36926	0.71315	0.985902	Decrease	nonDE	0.246622	0.95907	0.341126	0.912008	Increase	nonDE	-0.279455	-1.13993	0.258557	0.729129	Decrease	nonDE	0.437828	1.65277	0.103266	0.670439	Increase	nonDE	-0.0948507	-0.442706	0.659468	0.999557	Decrease	nonDE	-0.104322	-0.46598	0.642809	0.98961	Decrease	nonDE	-0.348127	-1.5441	0.127486	0.392629	Decrease
56	ENSMUSG00000000365	14	56640038	56762489	Rnf17	Rnf17	ring finger protein 17 [Source:MGI Symbol;Acc:MGI:1353419]	122451	0.57464	1.03839	0.302988	0.924765	Increase	nonDE	0.0489482	0.0834713	0.933737	0.993388	Increase	nonDE	0.370138	0.649614	0.518262	0.854024	Increase	nonDE	0.253451	0.417842	0.677459	0.911881	Increase	nonDE	0.343245	0.626025	0.53352	0.999557	Increase	nonDE	-0.768877	-1.37697	0.173311	0.899668	Decrease	nonDE	-0.258465	-0.461586	0.645941	0.832951	Decrease
57	ENSMUSG00000000374	10	78022559	78080475	Trappc10	Trappc10	trafficking protein particle complex 10 [Source:MGI Symbol;Acc:MGI:1336209]	57916	-0.100939	-0.917776	0.362175	0.943914	Decrease	nonDE	0.0683494	0.598828	0.551398	0.942924	Increase	nonDE	-0.0391409	-0.339715	0.735182	0.93124	Decrease	nonDE	0.00655118	0.0545384	0.956676	0.991283	Increase	nonDE	-0.000913899	-0.00896007	0.992879	0.999557	Decrease	nonDE	0.124591	1.14952	0.254611	0.927393	Increase	nonDE	0.108669	0.98755	0.327085	0.608558	Increase
58	ENSMUSG00000000378	11	6496887	6546744	Ccm2	Ccm2	cerebral cavernous malformation 2 [Source:MGI Symbol;Acc:MGI:2384924]	49857	-0.035567	-0.209664	0.834595	0.990048	Decrease	nonDE	-0.330238	-1.94697	0.0559211	0.857116	Decrease	nonDE	-0.0232985	-0.131148	0.896069	0.975148	Decrease	nonDE	-0.342507	-1.91286	0.0602337	0.659766	Decrease	nonDE	-0.0693844	-0.44888	0.655031	0.999557	Decrease	nonDE	-0.0285883	-0.175331	0.861372	0.995883	Decrease	nonDE	-0.0146049	-0.0867296	0.931157	0.973489	Decrease
59	ENSMUSG00000000384	11	6565598	6576067	Tbrg4	Tbrg4	transforming growth factor beta regulated gene 4 [Source:MGI Symbol;Acc:MGI:1100868]	10469	0.0348638	0.171061	0.864715	0.992818	Increase	nonDE	0.181962	0.830188	0.409513	0.923439	Increase	nonDE	0.232552	1.03502	0.304547	0.756926	Increase	nonDE	-0.0157259	-0.0654068	0.948054	0.988174	Decrease	nonDE	-0.0903405	-0.474104	0.637036	0.999557	Decrease	nonDE	0.0227668	0.111709	0.911403	0.998625	Increase	nonDE	0.194541	0.876387	0.384091	0.657704	Increase
60	ENSMUSG00000000385	16	97365882	97412395	Tmprss2	Tmprss2	transmembrane protease, serine 2 [Source:MGI Symbol;Acc:MGI:1354381]	46513	-0.371011	-0.724532	0.471375	0.959726	Decrease	nonDE	0.698818	1.30573	0.196311	0.882493	Increase	nonDE	0.21987	0.408449	0.684305	0.915225	Increase	nonDE	0.107938	0.19115	0.849012	0.961211	Increase	nonDE	-0.402349	-0.765583	0.446733	0.999557	Decrease	nonDE	0.154092	0.28489	0.776646	0.992561	Increase	nonDE	-1.20762	-2.2613	0.0271405	0.198346	Decrease
61	ENSMUSG00000000392	2	62331287	62404419	Fap	Fap	fibroblast activation protein [Source:MGI Symbol;Acc:MGI:109608]	73132	0.816775	1.61431	0.111371	0.914925	Increase	nonDE	-0.228651	-0.424931	0.67231	0.963347	Decrease	nonDE	0.00945496	0.0185991	0.985219	0.997803	Increase	nonDE	0.578669	1.06253	0.291982	0.752803	Increase	nonDE	0.652569	1.29092	0.201367	0.999557	Increase	nonDE	-0.978572	-1.88802	0.0635496	0.814784	Decrease	nonDE	0.597322	1.12993	0.262715	0.546774	Increase
62	ENSMUSG00000000399	6	126798684	126826099	Ndufa9	Ndufa9	NADH:ubiquinone oxidoreductase subunit A9 [Source:MGI Symbol;Acc:MGI:1913358]	27415	0.00893077	0.0578736	0.954029	0.995456	Increase	nonDE	-0.0781004	-0.488446	0.626901	0.959124	Decrease	nonDE	-0.0876003	-0.547891	0.585669	0.875546	Decrease	nonDE	0.0184307	0.11064	0.912247	0.976741	Increase	nonDE	-0.152765	-1.0363	0.303955	0.999557	Decrease	nonDE	-0.250013	-1.67119	0.0995575	0.849523	Decrease	nonDE	-0.372934	-2.39242	0.0196786	0.174911	Decrease
63	ENSMUSG00000000402	X	165306003	165368716	Egfl6	Egfl6	EGF-like-domain, multiple 6 [Source:MGI Symbol;Acc:MGI:1858599]	62713	-0.0763481	-0.147778	0.882982	0.994082	Decrease	nonDE	-0.527883	-1.00649	0.317964	0.907555	Decrease	nonDE	-0.782981	-1.49387	0.140116	0.653077	Decrease	nonDE	0.17875	0.333339	0.739966	0.928881	Increase	nonDE	-0.00948257	-0.0183799	0.985393	0.999557	Decrease	nonDE	-0.632699	-1.20567	0.232373	0.925473	Decrease	nonDE	-0.365265	-0.687552	0.494214	0.736552	Decrease
64	ENSMUSG00000000409	4	129442137	129467434	Lck	Lck	lymphocyte protein tyrosine kinase [Source:MGI Symbol;Acc:MGI:96756]	25297	-1.43232	-1.96635	0.0535906	0.914925	Decrease	nonDE	0.496529	0.690515	0.492362	0.933225	Increase	nonDE	-1.10791	-1.44057	0.154572	0.666055	Decrease	nonDE	0.17212	0.224594	0.823009	0.954728	Increase	nonDE	0.41334	0.514116	0.608938	0.999557	Increase	nonDE	0.212751	0.25014	0.803279	0.994411	Increase	nonDE	-1.85888	-2.57701	0.0122768	0.144531	Decrease
65	ENSMUSG00000000416	6	18366477	18514842	Cttnbp2	Cttnbp2	cortactin binding protein 2 [Source:MGI Symbol;Acc:MGI:1353467]	148365	0.048622	0.438309	0.662636	0.977684	Increase	nonDE	0.00404356	0.0349133	0.972257	0.997253	Increase	nonDE	0.124269	1.05555	0.295133	0.750624	Increase	nonDE	-0.0716035	-0.580823	0.563396	0.867002	Decrease	nonDE	0.00641477	0.0624339	0.950412	0.999557	Increase	nonDE	0.235892	2.13076	0.0369497	0.768752	Increase	nonDE	0.133797	1.19693	0.235739	0.520623	Increase
66	ENSMUSG00000000420	18	24338401	24419875	Galnt1	Galnt1	polypeptide N-acetylgalactosaminyltransferase 1 [Source:MGI Symbol;Acc:MGI:894693]	81474	-0.0912935	-0.767379	0.445673	0.955557	Decrease	nonDE	0.263023	2.08698	0.0408705	0.857116	Increase	nonDE	-0.268185	-2.19484	0.0318033	0.526423	Decrease	nonDE	0.439915	3.38184	0.00123093	0.659766	Increase	nonDE	0.0468371	0.435164	0.664905	0.999557	Increase	nonDE	0.271135	2.31612	0.0237602	0.758064	Increase	nonDE	0.206348	1.74546	0.0856949	0.3259	Increase
67	ENSMUSG00000000439	6	115578863	115599585	Mkrn2	Mkrn2	makorin, ring finger protein, 2 [Source:MGI Symbol;Acc:MGI:1914277]	20722	0.237502	1.39204	0.16872	0.914925	Increase	nonDE	-0.206003	-1.15516	0.252313	0.896322	Decrease	nonDE	-0.142027	-0.845006	0.401249	0.799512	Decrease	nonDE	0.173526	0.978467	0.331521	0.766854	Increase	nonDE	0.115899	0.76659	0.446139	0.999557	Increase	nonDE	-0.127203	-0.790763	0.431997	0.971494	Decrease	nonDE	-0.126051	-0.785405	0.435109	0.695727	Decrease
68	ENSMUSG00000000440	6	115337912	115467360	Pparg	Pparg	peroxisome proliferator activated receptor gamma [Source:MGI Symbol;Acc:MGI:97747]	129448	-0.570725	-1.27955	0.205315	0.914925	Decrease	nonDE	0.361329	0.788042	0.433576	0.926222	Increase	nonDE	-0.544063	-1.18412	0.240737	0.715315	Decrease	nonDE	0.334667	0.70402	0.48397	0.836632	Increase	nonDE	0.337806	0.823664	0.413184	0.999557	Increase	nonDE	-0.121714	-0.277384	0.782377	0.992561	Decrease	nonDE	1.16858	2.58757	0.0119421	0.14273	Increase
69	ENSMUSG00000000441	6	115595028	115653596	Raf1	Raf1	v-raf-leukemia viral oncogene 1 [Source:MGI Symbol;Acc:MGI:97847]	58568	-0.477239	-1.54452	0.127383	0.914925	Decrease	nonDE	0.488415	1.49837	0.138945	0.866234	Increase	nonDE	-0.817831	-2.65343	0.0100339	0.455927	Decrease	nonDE	0.829006	2.52874	0.0139187	0.659766	Increase	nonDE	0.100225	0.341038	0.73419	0.999557	Increase	nonDE	0.212992	0.648881	0.518733	0.979776	Increase	nonDE	-0.635678	-2.15944	0.0345627	0.221416	Decrease
70	ENSMUSG00000000486	7	126813619	126832302	Septin1	Septin1	septin 1 [Source:MGI Symbol;Acc:MGI:1858916]	18683	1.12557	2.596	0.0116807	0.914925	Increase	nonDE	-0.579727	-1.21149	0.230152	0.89017	Decrease	nonDE	1.1101	2.44637	0.0171833	0.473905	Increase	nonDE	-0.564256	-1.12741	0.263772	0.739376	Decrease	nonDE	-0.84869	-2.06668	0.0428075	0.999557	Decrease	nonDE	0.0924654	0.231359	0.817773	0.994687	Increase	nonDE	-0.26202	-0.56779	0.57216	0.786371	Decrease
71	ENSMUSG00000000489	15	79880075	79899178	Pdgfb	Pdgfb	platelet derived growth factor, B polypeptide [Source:MGI Symbol;Acc:MGI:97528]	19103	0.0613743	0.162437	0.871472	0.992959	Increase	nonDE	-0.533573	-1.4477	0.152574	0.868326	Decrease	nonDE	-0.920243	-2.7635	0.00745567	0.455927	Decrease	nonDE	0.448045	1.37552	0.173755	0.695858	Increase	nonDE	0.224857	0.722098	0.472859	0.999557	Increase	nonDE	-0.0647474	-0.191735	0.848555	0.995883	Decrease	nonDE	-0.0367042	-0.111219	0.91179	0.964491	Decrease
72	ENSMUSG00000000530	15	101026403	101043217	Acvrl1	Acvrl1	activin A receptor, type II-like 1 [Source:MGI Symbol;Acc:MGI:1338946]	16814	0.272778	0.727301	0.469689	0.959726	Increase	nonDE	-0.0165955	-0.0412002	0.967264	0.997115	Decrease	nonDE	-0.10462	-0.275417	0.783881	0.948144	Decrease	nonDE	0.360802	0.879058	0.382652	0.796153	Increase	nonDE	-0.505561	-1.5333	0.130122	0.999557	Decrease	nonDE	0.578393	1.58457	0.117985	0.866124	Increase	nonDE	0.128329	0.330333	0.742225	0.887117	Increase
73	ENSMUSG00000000531	15	101122069	101130637	Tamalin	Tamalin	trafficking regulator and scaffold protein tamalin [Source:MGI Symbol;Acc:MGI:1860303]	8568	-0.2381	-0.64631	0.520386	0.962951	Decrease	nonDE	-0.0690111	-0.185381	0.853516	0.985587	Decrease	nonDE	-0.0995393	-0.253234	0.800897	0.951964	Decrease	nonDE	-0.207572	-0.519181	0.605422	0.88336	Decrease	nonDE	-0.521425	-1.51747	0.134063	0.999557	Decrease	nonDE	0.176874	0.502561	0.616995	0.986935	Increase	nonDE	0.279265	0.677224	0.5007	0.741139	Increase
74	ENSMUSG00000000532	15	101071948	101111565	Acvr1b	Acvr1b	activin A receptor, type 1B [Source:MGI Symbol;Acc:MGI:1338944]	39617	0.181094	1.14671	0.255764	0.919545	Increase	nonDE	0.11728	0.688897	0.493374	0.933535	Increase	nonDE	0.0251064	0.15556	0.876869	0.969958	Increase	nonDE	0.273268	1.56335	0.122893	0.674283	Increase	nonDE	0.254801	1.75627	0.083817	0.999557	Increase	nonDE	0.040995	0.260035	0.79567	0.993433	Increase	nonDE	0.301797	1.90334	0.061487	0.28208	Increase
75	ENSMUSG00000000538	11	60117540	60243731	Tom1l2	Tom1l2	target of myb1-like 2 (chicken) [Source:MGI Symbol;Acc:MGI:2443306]	126191	0.0855089	0.526818	0.600138	0.974472	Increase	nonDE	-0.0804142	-0.476365	0.635434	0.959124	Decrease	nonDE	0.232492	1.35153	0.181274	0.683502	Increase	nonDE	-0.227397	-1.26661	0.209877	0.711396	Decrease	nonDE	0.213487	1.44467	0.153421	0.999557	Increase	nonDE	-0.0500096	-0.318646	0.751031	0.992561	Decrease	nonDE	0.249544	1.57253	0.120748	0.38229	Increase
76	ENSMUSG00000000552	15	103222322	103248520	Zfp385a	Zfp385a	zinc finger protein 385A [Source:MGI Symbol;Acc:MGI:1352495]	26198	-0.0541573	-0.303958	0.762144	0.986466	Decrease	nonDE	0.217825	1.15013	0.254361	0.896322	Increase	nonDE	0.00179858	0.00959087	0.992377	0.998385	Increase	nonDE	0.161869	0.810466	0.42067	0.809803	Increase	nonDE	-0.342276	-2.20207	0.031264	0.999557	Decrease	nonDE	0.286383	1.74224	0.086262	0.838748	Increase	nonDE	0.133606	0.730301	0.467866	0.717994	Increase
77	ENSMUSG00000000560	5	71114940	71253192	Gabra2	Gabra2	gamma-aminobutyric acid (GABA) A receptor, subunit alpha 2 [Source:MGI Symbol;Acc:MGI:95614]	138252	0.100466	0.88512	0.379399	0.945303	Increase	nonDE	-0.14949	-1.27163	0.208097	0.883214	Decrease	nonDE	0.0387469	0.32882	0.743363	0.934614	Increase	nonDE	-0.0877709	-0.715315	0.477011	0.834388	Decrease	nonDE	-0.240329	-2.28471	0.0256485	0.999557	Decrease	nonDE	0.170253	1.54523	0.127213	0.869469	Increase	nonDE	-0.210366	-1.87786	0.0649491	0.288217	Decrease
78	ENSMUSG00000000561	3	105866685	105877353	Wdr77	Wdr77	WD repeat domain 77 [Source:MGI Symbol;Acc:MGI:1917715]	10668	-0.127094	-0.744057	0.45956	0.957694	Decrease	nonDE	0.00192437	0.010846	0.99138	0.999195	Increase	nonDE	-0.113222	-0.635941	0.527078	0.854511	Decrease	nonDE	-0.0119478	-0.0642922	0.948938	0.988292	Decrease	nonDE	0.234645	1.4392	0.154958	0.999557	Increase	nonDE	-0.485084	-2.89697	0.00514927	0.721732	Decrease	nonDE	-0.149181	-0.874477	0.385122	0.65832	Decrease
79	ENSMUSG00000000562	3	105778174	105816242	Adora3	Adora3	adenosine A3 receptor [Source:MGI Symbol;Acc:MGI:104847]	38068	-0.442489	-0.672549	0.503651	0.962408	Decrease	nonDE	0.398855	0.586667	0.559487	0.944885	Increase	nonDE	-0.94173	-1.40936	0.163561	0.673343	Decrease	nonDE	0.898096	1.29152	0.20116	0.706665	Increase	nonDE	0.53458	0.822392	0.413901	0.999557	Increase	nonDE	-0.170629	-0.250211	0.803224	0.994411	Decrease	nonDE	-0.471676	-0.719364	0.47453	0.722247	Decrease
80	ENSMUSG00000000563	3	105850014	105867415	Atp5pb	Atp5pb	ATP synthase peripheral stalk-membrane subunit b [Source:MGI Symbol;Acc:MGI:1100495]	17401	-0.0930621	-0.589551	0.557564	0.969232	Decrease	nonDE	0.0237308	0.14501	0.885158	0.987265	Increase	nonDE	-0.101696	-0.617661	0.538986	0.859357	Decrease	nonDE	0.0323645	0.188663	0.850953	0.961644	Increase	nonDE	-0.19057	-1.25333	0.214638	0.999557	Decrease	nonDE	-0.197794	-1.27696	0.206222	0.911302	Decrease	nonDE	-0.456294	-2.8726	0.00551368	0.108168	Decrease
81	ENSMUSG00000000567	11	112673050	112678586	Sox9	Sox9	SRY (sex determining region Y)-box 9 [Source:MGI Symbol;Acc:MGI:98371]	5536	0.0386595	0.300393	0.764849	0.986583	Increase	nonDE	-0.0348739	-0.260621	0.79522	0.979581	Decrease	nonDE	-0.168808	-1.28136	0.20468	0.691869	Decrease	nonDE	0.172594	1.25222	0.215037	0.71504	Increase	nonDE	0.0651261	0.534848	0.594605	0.999557	Increase	nonDE	-0.0831785	-0.651676	0.51694	0.979776	Decrease	nonDE	0.106279	0.810521	0.420639	0.685108	Increase
82	ENSMUSG00000000568	5	100103794	100126797	Hnrnpd	Hnrnpd	heterogeneous nuclear ribonucleoprotein D [Source:MGI Symbol;Acc:MGI:101947]	23003	0.256016	2.37229	0.0206894	0.914925	Increase	nonDE	-0.0811908	-0.715867	0.476672	0.930733	Decrease	nonDE	0.304424	2.68586	0.00920049	0.455927	Increase	nonDE	-0.129599	-1.08452	0.282195	0.748755	Decrease	nonDE	0.147029	1.48225	0.143172	0.999557	Increase	nonDE	0.197954	1.84917	0.0690442	0.826898	Increase	nonDE	0.322198	2.9851	0.00400941	0.0949233	Increase
83	ENSMUSG00000000581	11	17207579	17219176	C1d	C1d	C1D nuclear receptor co-repressor [Source:MGI Symbol;Acc:MGI:1927354]	11597	-0.124035	-0.780008	0.438256	0.955557	Decrease	nonDE	0.349747	2.04993	0.0444653	0.857116	Increase	nonDE	-0.0538764	-0.321594	0.748807	0.936021	Decrease	nonDE	0.279588	1.55397	0.125114	0.674283	Increase	nonDE	-0.15968	-1.05461	0.295563	0.999557	Decrease	nonDE	-0.109344	-0.70238	0.484984	0.976413	Decrease	nonDE	-0.341521	-2.13171	0.0368684	0.227543	Decrease
84	ENSMUSG00000000594	11	54988941	55003855	Gm2a	Gm2a	GM2 ganglioside activator protein [Source:MGI Symbol;Acc:MGI:95762]	14914	-0.321085	-2.00185	0.0495347	0.914925	Decrease	nonDE	0.153466	0.929908	0.355906	0.913747	Increase	nonDE	-0.00101893	-0.0058166	0.995377	0.999387	Decrease	nonDE	-0.1666	-0.921533	0.360227	0.782987	Decrease	nonDE	-0.121597	-0.796571	0.42864	0.999557	Decrease	nonDE	-0.0873113	-0.553504	0.581844	0.983222	Decrease	nonDE	-0.19758	-1.18862	0.238973	0.523382	Decrease
85	ENSMUSG00000000600	5	3853184	3895564	Krit1	Krit1	KRIT1, ankyrin repeat containing [Source:MGI Symbol;Acc:MGI:1930618]	42380	0.0329184	0.262757	0.79358	0.986922	Increase	nonDE	0.194615	1.46208	0.148603	0.868326	Increase	nonDE	0.071978	0.547725	0.585782	0.875546	Increase	nonDE	0.155555	1.11148	0.270512	0.744402	Increase	nonDE	0.127116	1.10673	0.272547	0.999557	Increase	nonDE	0.185749	1.49673	0.139369	0.883456	Increase	nonDE	0.258993	2.08084	0.0414483	0.23819	Increase
86	ENSMUSG00000000605	7	7285308	7303850	Clcn4	Clcn4	chloride channel, voltage-sensitive 4 [Source:MGI Symbol;Acc:MGI:104571]	18542	-0.1395	-1.3102	0.194803	0.914925	Decrease	nonDE	-0.0367449	-0.335878	0.738059	0.973429	Decrease	nonDE	-0.0783634	-0.702485	0.484919	0.838027	Decrease	nonDE	-0.0978813	-0.849306	0.398871	0.801432	Decrease	nonDE	-0.233649	-2.29888	0.0247809	0.999557	Decrease	nonDE	-0.212249	-2.05677	0.0437821	0.781166	Decrease	nonDE	-0.330341	-3.07774	0.00306722	0.0871195	Decrease
87	ENSMUSG00000000627	6	82888866	82916750	Sema4f	Sema4f	sema domain, immunoglobulin domain (Ig), TM domain, and short cytoplasmic domain [Source:MGI Symbol;Acc:MGI:1340055]	27884	0.0817732	0.494	0.622994	0.974913	Increase	nonDE	-0.10755	-0.624911	0.534247	0.938043	Decrease	nonDE	0.329707	1.82756	0.0722686	0.582103	Increase	nonDE	-0.355484	-1.89243	0.0629494	0.659766	Decrease	nonDE	0.088372	0.594289	0.55441	0.999557	Increase	nonDE	0.207002	1.26844	0.209228	0.91468	Increase	nonDE	0.274275	1.66648	0.100497	0.35202	Increase
88	ENSMUSG00000000628	6	82702006	82751435	Hk2	Hk2	hexokinase 2 [Source:MGI Symbol;Acc:MGI:1315197]	49429	0.299368	1.0908	0.279445	0.920945	Increase	nonDE	0.177147	0.576909	0.566021	0.948037	Increase	nonDE	0.0310611	0.115805	0.908169	0.977352	Increase	nonDE	0.445454	1.46626	0.147463	0.685125	Increase	nonDE	0.259678	1.04419	0.300319	0.999557	Increase	nonDE	0.00679884	0.024611	0.980442	0.999888	Increase	nonDE	0.221503	0.799639	0.426872	0.689144	Increase
89	ENSMUSG00000000631	11	77654072	77756806	Myo18a	Myo18a	myosin XVIIIA [Source:MGI Symbol;Acc:MGI:2667185]	102734	0.139941	0.935151	0.353219	0.942404	Increase	nonDE	-0.0539703	-0.344655	0.731481	0.971937	Decrease	nonDE	0.323057	2.02612	0.046917	0.550413	Increase	nonDE	-0.237087	-1.41761	0.161146	0.691486	Decrease	nonDE	-0.00421182	-0.0311112	0.975277	0.999557	Decrease	nonDE	0.112584	0.782569	0.436761	0.973417	Increase	nonDE	0.314562	2.11331	0.0384715	0.23141	Increase
90	ENSMUSG00000000632	11	77821626	77869874	Sez6	Sez6	seizure related gene 6 [Source:MGI Symbol;Acc:MGI:104745]	48248	-0.173233	-1.05533	0.295234	0.924765	Decrease	nonDE	-0.00594758	-0.0353535	0.971908	0.997115	Decrease	nonDE	-0.424367	-2.53838	0.0135757	0.455927	Decrease	nonDE	0.245187	1.42072	0.160244	0.691486	Increase	nonDE	-0.155881	-0.974993	0.333228	0.999557	Decrease	nonDE	-0.0190503	-0.115115	0.908714	0.998545	Decrease	nonDE	-0.447178	-2.68666	0.00918065	0.129074	Decrease
91	ENSMUSG00000000682	4	133809759	133822393	Cd52	Cd52	CD52 antigen [Source:MGI Symbol;Acc:MGI:1346088]	12634	0.144227	0.248806	0.804306	0.989199	Increase	nonDE	-0.412814	-0.696899	0.488385	0.933225	Decrease	nonDE	-0.503545	-0.86813	0.388561	0.794969	Decrease	nonDE	0.234958	0.393153	0.69551	0.915329	Increase	nonDE	-0.248435	-0.428701	0.669578	0.999557	Decrease	nonDE	-0.359126	-0.61106	0.54332	0.981879	Decrease	nonDE	-0.347956	-0.575763	0.566791	0.783181	Decrease
92	ENSMUSG00000000686	11	77405947	77429433	Abhd15	Abhd15	abhydrolase domain containing 15 [Source:MGI Symbol;Acc:MGI:1914727]	23486	-0.615505	-1.12732	0.263809	0.919545	Decrease	nonDE	0.372324	0.664305	0.508877	0.936291	Increase	nonDE	-0.431138	-0.758891	0.450699	0.821659	Decrease	nonDE	0.187957	0.320381	0.749721	0.933114	Increase	nonDE	0.148089	0.269173	0.78866	0.999557	Increase	nonDE	-0.287073	-0.505683	0.614814	0.986277	Decrease	nonDE	-0.760111	-1.36464	0.177136	0.45528	Decrease
93	ENSMUSG00000000693	6	83011154	83029543	Loxl3	Loxl3	lysyl oxidase-like 3 [Source:MGI Symbol;Acc:MGI:1337004]	18389	-0.755748	-1.64138	0.105615	0.914925	Decrease	nonDE	1.01918	2.11831	0.0380295	0.857116	Increase	nonDE	-0.289916	-0.598949	0.551317	0.864258	Decrease	nonDE	0.553345	1.09	0.279794	0.748311	Increase	nonDE	-0.208266	-0.491308	0.624886	0.999557	Decrease	nonDE	0.946693	2.06628	0.0428467	0.781166	Increase	nonDE	-0.583311	-1.33872	0.185388	0.46562	Decrease
94	ENSMUSG00000000708	17	53873889	53979748	Kat2b	Kat2b	K(lysine) acetyltransferase 2B [Source:MGI Symbol;Acc:MGI:1343094]	105859	-0.0624459	-0.414321	0.680022	0.979644	Decrease	nonDE	0.15301	0.967804	0.336779	0.911131	Increase	nonDE	-0.0512731	-0.326191	0.745342	0.934937	Decrease	nonDE	0.141837	0.856752	0.394773	0.800639	Increase	nonDE	-0.0433939	-0.306418	0.760279	0.999557	Decrease	nonDE	0.240599	1.58722	0.117381	0.866124	Increase	nonDE	-0.218118	-1.45939	0.14934	0.422215	Decrease
95	ENSMUSG00000000711	10	128513044	128532133	Rab5b	Rab5b	RAB5B, member RAS oncogene family [Source:MGI Symbol;Acc:MGI:105938]	19089	0.0218496	0.142638	0.887024	0.994099	Increase	nonDE	0.164423	1.00585	0.318269	0.907555	Increase	nonDE	-0.158221	-1.00427	0.319021	0.765717	Decrease	nonDE	0.344494	2.04014	0.0454599	0.659766	Increase	nonDE	0.120785	0.841236	0.403342	0.999557	Increase	nonDE	0.0918888	0.588735	0.558107	0.983222	Increase	nonDE	-0.197445	-1.31244	0.19405	0.474888	Decrease
96	ENSMUSG00000000732	10	77905136	77919747	Icosl	Icosl	icos ligand [Source:MGI Symbol;Acc:MGI:1354701]	14611	-0.0723197	-0.248721	0.804371	0.989199	Decrease	nonDE	0.164267	0.529162	0.59852	0.951993	Increase	nonDE	0.568943	1.63757	0.106409	0.620522	Increase	nonDE	-0.476996	-1.30154	0.197731	0.706665	Decrease	nonDE	-0.194722	-0.769099	0.444659	0.999557	Decrease	nonDE	0.297555	1.07038	0.28846	0.943286	Increase	nonDE	0.60265	1.87611	0.0651928	0.288702	Increase
97	ENSMUSG00000000738	8	123789681	123824499	Spg7	Spg7	SPG7, paraplegin matrix AAA peptidase subunit [Source:MGI Symbol;Acc:MGI:2385906]	34818	0.059568	0.456419	0.649631	0.975654	Increase	nonDE	-0.0709677	-0.522377	0.603208	0.953505	Decrease	nonDE	0.170785	1.23046	0.223021	0.703796	Increase	nonDE	-0.182185	-1.25702	0.213305	0.714468	Decrease	nonDE	0.0400024	0.33511	0.738636	0.999557	Increase	nonDE	-0.157235	-1.26604	0.21008	0.915081	Decrease	nonDE	0.117346	0.907996	0.36728	0.643618	Increase
98	ENSMUSG00000000740	8	123829089	123831983	Rpl13	Rpl13	ribosomal protein L13 [Source:MGI Symbol;Acc:MGI:105922]	2894	-0.143461	-1.29732	0.199169	0.914925	Decrease	nonDE	-0.00887837	-0.0779856	0.938082	0.994617	Decrease	nonDE	0.0320255	0.27375	0.785157	0.948252	Increase	nonDE	-0.184365	-1.52353	0.132544	0.677809	Decrease	nonDE	-0.185379	-1.77256	0.0810513	0.999557	Decrease	nonDE	-0.0869979	-0.808096	0.422023	0.967645	Decrease	nonDE	-0.0367235	-0.325365	0.745964	0.88874	Decrease
99	ENSMUSG00000000743	8	123931003	123939502	Chmp1a	Chmp1a	charged multivesicular body protein 1A [Source:MGI Symbol;Acc:MGI:1920159]	8499	-0.259344	-1.63733	0.106461	0.914925	Decrease	nonDE	0.075582	0.463939	0.644263	0.959505	Increase	nonDE	0.0840264	0.489263	0.626325	0.891421	Increase	nonDE	-0.267789	-1.51077	0.135759	0.679178	Decrease	nonDE	-0.338682	-2.2141	0.0303841	0.999557	Decrease	nonDE	-0.19412	-1.26158	0.21167	0.916281	Decrease	nonDE	-0.138946	-0.828533	0.410442	0.677321	Decrease
100	ENSMUSG00000000751	11	75188992	75239150	Rpa1	Rpa1	replication protein A1 [Source:MGI Symbol;Acc:MGI:1915525]	50158	0.0598913	0.455815	0.650063	0.975654	Increase	nonDE	-0.211252	-1.56646	0.122162	0.866234	Decrease	nonDE	-0.064225	-0.474582	0.636697	0.894656	Decrease	nonDE	-0.0871357	-0.623267	0.53532	0.858248	Decrease	nonDE	0.294506	2.43618	0.0176315	0.999557	Increase	nonDE	-0.214671	-1.67475	0.0988549	0.849523	Decrease	nonDE	0.0585437	0.457781	0.648657	0.834166	Increase
101	ENSMUSG00000000753	11	75300595	75313527	Serpinf1	Serpinf1	serine (or cysteine) peptidase inhibitor, clade F, member 1 [Source:MGI Symbol;Acc:MGI:108080]	12932	0.133894	0.482211	0.631298	0.975135	Increase	nonDE	-0.335858	-1.19765	0.235463	0.891387	Decrease	nonDE	-0.280889	-1.02519	0.309125	0.759184	Decrease	nonDE	0.0789248	0.282743	0.778285	0.941919	Increase	nonDE	-0.414984	-1.66769	0.100253	0.999557	Decrease	nonDE	0.153786	0.596078	0.553221	0.983222	Increase	nonDE	-0.131963	-0.46517	0.643386	0.831334	Decrease
102	ENSMUSG00000000759	8	12664277	12722248	Tubgcp3	Tubgcp3	tubulin, gamma complex associated protein 3 [Source:MGI Symbol;Acc:MGI:2183752]	57971	-0.1626	-0.761337	0.449247	0.955557	Decrease	nonDE	0.176719	0.793958	0.430149	0.925602	Increase	nonDE	-0.333712	-1.51369	0.135018	0.650773	Decrease	nonDE	0.347832	1.50572	0.137049	0.679368	Increase	nonDE	-0.114072	-0.573335	0.568424	0.999557	Decrease	nonDE	0.177226	0.825975	0.411881	0.965421	Increase	nonDE	-0.450308	-2.15164	0.0351984	0.222827	Decrease
103	ENSMUSG00000000766	10	6708506	6988198	Oprm1	Oprm1	opioid receptor, mu 1 [Source:MGI Symbol;Acc:MGI:97441]	279692	0.169833	0.301503	0.764006	0.986516	Increase	nonDE	-0.0264438	-0.0449833	0.96426	0.997115	Decrease	nonDE	-0.463132	-0.820447	0.415001	0.805347	Decrease	nonDE	0.606521	1.02146	0.310874	0.758131	Increase	nonDE	-0.759933	-1.31187	0.194243	0.999557	Decrease	nonDE	0.213194	0.361248	0.719102	0.992561	Increase	nonDE	-1.8458	-3.2722	0.00172073	0.069121	Decrease
104	ENSMUSG00000000776	14	70676197	70680887	Polr3d	Polr3d	polymerase (RNA) III (DNA directed) polypeptide D [Source:MGI Symbol;Acc:MGI:1914315]	4690	-0.112441	-0.700389	0.486218	0.959726	Decrease	nonDE	0.191472	1.12545	0.264593	0.898505	Increase	nonDE	-0.0781373	-0.462194	0.645507	0.898316	Decrease	nonDE	0.157168	0.875371	0.384639	0.796561	Increase	nonDE	-0.126387	-0.824421	0.412757	0.999557	Decrease	nonDE	-0.103919	-0.655821	0.514286	0.979776	Decrease	nonDE	-0.279293	-1.71633	0.0909288	0.336088	Decrease
105	ENSMUSG00000000782	11	52143198	52174158	Tcf7	Tcf7	transcription factor 7, T cell specific [Source:MGI Symbol;Acc:MGI:98507]	30960	-0.34492	-0.625065	0.534147	0.964771	Decrease	nonDE	1.08336	1.84867	0.0691169	0.857116	Increase	nonDE	-0.0180755	-0.0313006	0.975127	0.996039	Decrease	nonDE	0.756512	1.23027	0.22309	0.718916	Increase	nonDE	0.167657	0.307872	0.759177	0.999557	Increase	nonDE	0.274231	0.4759	0.635763	0.98925	Increase	nonDE	0.385092	0.670216	0.505127	0.744525	Increase
106	ENSMUSG00000000787	X	13147209	13160291	Ddx3x	Ddx3x	DEAD box helicase 3, X-linked [Source:MGI Symbol;Acc:MGI:103064]	13082	0.101656	1.3359	0.186304	0.914925	Increase	nonDE	0.0672883	0.839221	0.404463	0.921142	Increase	nonDE	0.159907	2.00246	0.0494678	0.554432	Increase	nonDE	0.0090377	0.107084	0.915057	0.977233	Increase	nonDE	0.114929	1.53298	0.1302	0.999557	Increase	nonDE	0.0943697	1.17771	0.243266	0.926783	Increase	nonDE	0.15151	1.88572	0.0638642	0.285967	Increase
107	ENSMUSG00000000792	8	71335533	71345401	Slc5a5	Slc5a5	solute carrier family 5 (sodium iodide symporter), member 5 [Source:MGI Symbol;Acc:MGI:2149330]	9868	0.614753	1.56836	0.12172	0.914925	Increase	nonDE	-0.826275	-2.10349	0.0393516	0.857116	Decrease	nonDE	-0.367018	-1.02572	0.308879	0.759032	Decrease	nonDE	0.155497	0.429491	0.669006	0.908629	Increase	nonDE	-0.0745887	-0.227252	0.82095	0.999557	Decrease	nonDE	-0.468716	-1.45523	0.150484	0.891709	Decrease	nonDE	0.504124	1.27284	0.207672	0.490383	Increase
108	ENSMUSG00000000794	3	89427471	89582439	Kcnn3	Kcnn3	potassium intermediate/small conductance calcium-activated channel, subfamily N, member 3 [Source:MGI Symbol;Acc:MGI:2153183]	154968	-0.0159466	-0.0402231	0.96804	0.995715	Decrease	nonDE	0.215599	0.512144	0.61031	0.954968	Increase	nonDE	-0.0155186	-0.0380474	0.969768	0.994489	Decrease	nonDE	0.215171	0.494534	0.622619	0.890401	Increase	nonDE	0.141162	0.388205	0.69915	0.999557	Increase	nonDE	-0.046227	-0.118001	0.906436	0.998034	Decrease	nonDE	-0.182008	-0.475563	0.636002	0.82663	Decrease
109	ENSMUSG00000000804	11	84875268	85030987	Usp32	Usp32	ubiquitin specific peptidase 32 [Source:MGI Symbol;Acc:MGI:2144475]	155719	0.0942471	0.847119	0.40008	0.947453	Increase	nonDE	0.122203	1.03889	0.302759	0.907555	Increase	nonDE	0.14581	1.24993	0.215869	0.698024	Increase	nonDE	0.0706407	0.571123	0.569913	0.870514	Increase	nonDE	0.104697	1.01414	0.314327	0.999557	Increase	nonDE	0.123436	1.11808	0.267705	0.932728	Increase	nonDE	0.214136	1.92579	0.0585672	0.27658	Increase
110	ENSMUSG00000000805	11	84848612	84856870	Car4	Car4	carbonic anhydrase 4 [Source:MGI Symbol;Acc:MGI:1096574]	8258	0.0709819	0.466224	0.642635	0.975449	Increase	nonDE	0.036092	0.225205	0.822536	0.983804	Increase	nonDE	0.233795	1.44314	0.153847	0.665404	Increase	nonDE	-0.126721	-0.74174	0.460953	0.826018	Decrease	nonDE	0.240686	1.66606	0.100581	0.999557	Increase	nonDE	-0.125198	-0.81838	0.416171	0.966143	Decrease	nonDE	0.0682219	0.446539	0.656713	0.839705	Increase
111	ENSMUSG00000000811	6	89620970	89652511	Txnrd3	Txnrd3	thioredoxin reductase 3 [Source:MGI Symbol;Acc:MGI:2386711]	31541	-0.130439	-0.606079	0.546602	0.966022	Decrease	nonDE	-0.0837698	-0.384212	0.702092	0.966741	Decrease	nonDE	-0.0661558	-0.289019	0.7735	0.944646	Decrease	nonDE	-0.148052	-0.634448	0.528045	0.856443	Decrease	nonDE	-0.0576136	-0.305008	0.761348	0.999557	Decrease	nonDE	-0.209804	-1.08181	0.283388	0.940389	Decrease	nonDE	-0.0658794	-0.320632	0.749532	0.89085	Decrease
112	ENSMUSG00000000823	2	181223896	181234596	Zfp512b	Zfp512b	zinc finger protein 512B [Source:MGI Symbol;Acc:MGI:2685478]	10700	-0.0710109	-0.262141	0.794053	0.987026	Decrease	nonDE	0.0630518	0.221758	0.825207	0.983804	Increase	nonDE	-0.00645332	-0.0222966	0.982281	0.997575	Decrease	nonDE	-0.00150578	-0.00494797	0.996067	0.9992	Decrease	nonDE	0.018746	0.0818666	0.935008	0.999557	Increase	nonDE	0.105302	0.425985	0.671545	0.990618	Increase	nonDE	0.260025	0.967629	0.336865	0.617246	Increase
113	ENSMUSG00000000826	2	181162278	181196926	Dnajc5	Dnajc5	DnaJ heat shock protein family (Hsp40) member C5 [Source:MGI Symbol;Acc:MGI:892995]	34648	0.0348142	0.327364	0.744459	0.986466	Increase	nonDE	-0.0840361	-0.762764	0.448401	0.929442	Decrease	nonDE	0.217768	1.93061	0.0579554	0.566989	Increase	nonDE	-0.26699	-2.27596	0.0261973	0.659766	Decrease	nonDE	0.034293	0.350086	0.727421	0.999557	Increase	nonDE	-0.0385093	-0.374258	0.709447	0.992561	Decrease	nonDE	0.298801	2.78991	0.00693498	0.11862	Increase
114	ENSMUSG00000000827	2	181138935	181159759	Tpd52l2	Tpd52l2	tumor protein D52-like 2 [Source:MGI Symbol;Acc:MGI:1913564]	20824	-0.356341	-2.41382	0.0186525	0.914925	Decrease	nonDE	0.0327307	0.220176	0.826434	0.983804	Increase	nonDE	-0.482527	-3.16049	0.00240451	0.430429	Decrease	nonDE	0.158917	1.02578	0.308849	0.757118	Increase	nonDE	-0.10685	-0.788736	0.433173	0.999557	Decrease	nonDE	-0.0730089	-0.519193	0.605414	0.984457	Decrease	nonDE	-0.255026	-1.77352	0.0808907	0.318184	Decrease
115	ENSMUSG00000000838	X	67722147	67761569	Fmr1	Fmr1	FMRP translational regulator 1 [Source:MGI Symbol;Acc:MGI:95564]	39422	0.126237	1.11494	0.269037	0.919545	Increase	nonDE	0.0682432	0.570812	0.570122	0.949073	Increase	nonDE	0.0583509	0.496712	0.621091	0.889695	Increase	nonDE	0.136129	1.09301	0.278478	0.748171	Increase	nonDE	0.120809	1.15278	0.253279	0.999557	Increase	nonDE	0.0850786	0.759572	0.450294	0.975446	Increase	nonDE	0.367722	3.18773	0.00221755	0.0772703	Increase
116	ENSMUSG00000000861	11	24028056	24124123	Bcl11a	Bcl11a	B cell CLL/lymphoma 11A (zinc finger protein) [Source:MGI Symbol;Acc:MGI:106190]	96067	0.239513	1.42629	0.158637	0.914925	Increase	nonDE	-0.137829	-0.778876	0.438918	0.929096	Decrease	nonDE	0.268498	1.51726	0.134116	0.649791	Increase	nonDE	-0.166814	-0.892228	0.375607	0.793207	Decrease	nonDE	0.0138176	0.0917511	0.927182	0.999557	Increase	nonDE	-0.0426989	-0.270067	0.787976	0.992561	Decrease	nonDE	0.375162	2.19096	0.0320959	0.21488	Increase
117	ENSMUSG00000000876	2	154427678	154445628	Pxmp4	Pxmp4	peroxisomal membrane protein 4 [Source:MGI Symbol;Acc:MGI:1891701]	17950	0.143668	0.464232	0.644054	0.975554	Increase	nonDE	-0.0649756	-0.201674	0.84081	0.984929	Decrease	nonDE	0.0947231	0.29573	0.768392	0.942877	Increase	nonDE	-0.0160303	-0.0478253	0.962004	0.992655	Decrease	nonDE	-0.0422386	-0.15414	0.877984	0.999557	Decrease	nonDE	-0.369313	-1.33617	0.186217	0.900166	Decrease	nonDE	0.275917	0.846297	0.400534	0.669997	Increase
118	ENSMUSG00000000881	X	99811328	99862016	Dlg3	Dlg3	discs large MAGUK scaffold protein 3 [Source:MGI Symbol;Acc:MGI:1888986]	50688	-0.0413867	-0.376358	0.707893	0.985014	Decrease	nonDE	0.0399454	0.348577	0.728549	0.970885	Increase	nonDE	0.185639	1.57565	0.120028	0.637694	Increase	nonDE	-0.18708	-1.52003	0.133419	0.679032	Decrease	nonDE	-0.0609279	-0.601981	0.54931	0.999557	Decrease	nonDE	0.117118	1.0932	0.278395	0.939087	Increase	nonDE	0.125504	1.13787	0.25941	0.544043	Increase
119	ENSMUSG00000000884	16	18317463	18385429	Gnb1l	Gnb1l	guanine nucleotide binding protein (G protein), beta polypeptide 1-like [Source:MGI Symbol;Acc:MGI:1338057]	67966	0.0957746	0.221978	0.825037	0.989901	Increase	nonDE	0.381936	0.818181	0.416284	0.924801	Increase	nonDE	-0.200896	-0.461719	0.645846	0.898587	Decrease	nonDE	0.678606	1.43219	0.156945	0.690234	Increase	nonDE	0.197352	0.491774	0.624558	0.999557	Increase	nonDE	-0.385629	-0.932985	0.354328	0.953827	Decrease	nonDE	0.541687	1.22937	0.223424	0.506399	Increase
120	ENSMUSG00000000889	2	27055245	27073212	Dbh	Dbh	dopamine beta hydroxylase [Source:MGI Symbol;Acc:MGI:94864]	17967	0.898943	1.31689	0.192564	0.914925	Increase	nonDE	-0.513468	-0.717728	0.475532	0.930733	Decrease	nonDE	-0.715761	-1.08278	0.282962	0.743903	Decrease	nonDE	1.10124	1.57181	0.120917	0.674283	Increase	nonDE	1.32777	2.18534	0.032524	0.999557	Increase	nonDE	-0.857499	-1.29481	0.200029	0.907278	Decrease	nonDE	1.19036	1.86859	0.0662489	0.291126	Increase
121	ENSMUSG00000000901	10	75759056	75772330	Mmp11	Mmp11	matrix metallopeptidase 11 [Source:MGI Symbol;Acc:MGI:97008]	13274	0.212128	0.392148	0.696249	0.983575	Increase	nonDE	-0.369347	-0.663304	0.509513	0.936291	Decrease	nonDE	0.210191	0.375498	0.708529	0.921532	Increase	nonDE	-0.36741	-0.63378	0.528479	0.85665	Decrease	nonDE	0.416506	0.762635	0.448478	0.999557	Increase	nonDE	-0.964302	-1.7382	0.0869754	0.838748	Decrease	nonDE	-0.686794	-1.24958	0.215996	0.497893	Decrease
122	ENSMUSG00000000902	10	75732603	75757451	Smarcb1	Smarcb1	SWI/SNF related, matrix associated, actin dependent regulator of chromatin, subfamily b, member 1 [Source:MGI Symbol;Acc:MGI:1328366]	24848	0.186273	1.52726	0.131615	0.914925	Increase	nonDE	0.0400698	0.309148	0.758211	0.976219	Increase	nonDE	0.198455	1.54384	0.127547	0.6432	Increase	nonDE	0.0278881	0.203786	0.839166	0.958411	Increase	nonDE	0.221067	1.97632	0.052424	0.999557	Increase	nonDE	-0.008084	-0.0669941	0.946795	0.999888	Decrease	nonDE	0.17444	1.44286	0.153926	0.428298	Increase
123	ENSMUSG00000000915	5	124111691	124143621	Hip1r	Hip1r	huntingtin interacting protein 1 related [Source:MGI Symbol;Acc:MGI:1352504]	31930	0.0836047	0.600561	0.550249	0.967057	Increase	nonDE	-0.126784	-0.876644	0.383952	0.916342	Decrease	nonDE	0.27594	1.84047	0.0703281	0.581864	Increase	nonDE	-0.319119	-2.04385	0.0450811	0.659766	Decrease	nonDE	-0.107264	-0.861613	0.392111	0.999557	Decrease	nonDE	0.172355	1.29478	0.200039	0.907278	Increase	nonDE	0.294928	2.07122	0.0423671	0.240055	Increase
124	ENSMUSG00000000916	5	135398807	135405659	Nsun5	Nsun5	NOL1/NOP2/Sun domain family, member 5 [Source:MGI Symbol;Acc:MGI:2140844]	6852	-0.142464	-0.391719	0.696565	0.983575	Decrease	nonDE	0.400456	1.02405	0.309658	0.907555	Increase	nonDE	0.243764	0.605833	0.546764	0.862371	Increase	nonDE	0.0142277	0.0330625	0.973727	0.995824	Increase	nonDE	-0.146427	-0.44797	0.655685	0.999557	Decrease	nonDE	0.274921	0.770767	0.443676	0.974327	Increase	nonDE	-0.0248366	-0.0686795	0.945458	0.978495	Decrease
125	ENSMUSG00000000934	15	75528884	75550649	Top1mt	Top1mt	DNA topoisomerase 1, mitochondrial [Source:MGI Symbol;Acc:MGI:1920210]	21765	-0.0174769	-0.0485252	0.961449	0.995525	Decrease	nonDE	0.415928	1.04963	0.297827	0.905305	Increase	nonDE	-0.046132	-0.123273	0.902277	0.976282	Decrease	nonDE	0.444583	1.07875	0.284741	0.750058	Increase	nonDE	-0.011066	-0.0304849	0.975775	0.999557	Decrease	nonDE	-0.122232	-0.319704	0.750232	0.992561	Decrease	nonDE	0.124794	0.30722	0.759672	0.896463	Increase
126	ENSMUSG00000000948	7	59623897	59654812	Gm38393	Gm38393	predicted gene, 38393 [Source:MGI Symbol;Acc:MGI:5613898]	30915	0.0473956	0.185077	0.853753	0.992199	Increase	nonDE	0.247734	0.891672	0.375903	0.916342	Increase	nonDE	0.159769	0.571273	0.569811	0.870529	Increase	nonDE	0.135361	0.448403	0.655374	0.902776	Increase	nonDE	0.210751	0.88333	0.380358	0.999557	Increase	nonDE	-0.0248759	-0.0961192	0.923726	0.999888	Decrease	nonDE	0.450905	1.6062	0.113144	0.370052	Increase
127	ENSMUSG00000000957	14	54669069	54682821	Mmp14	Mmp14	matrix metallopeptidase 14 (membrane-inserted) [Source:MGI Symbol;Acc:MGI:101900]	13752	0.0428449	0.187926	0.851528	0.991772	Increase	nonDE	-0.0728162	-0.306208	0.760438	0.976695	Decrease	nonDE	0.00110426	0.00457182	0.996366	0.99957	Increase	nonDE	-0.0310756	-0.122958	0.902525	0.973742	Decrease	nonDE	-0.0139826	-0.065691	0.947828	0.999557	Decrease	nonDE	-0.0883727	-0.392747	0.695809	0.99144	Decrease	nonDE	0.215716	0.872934	0.385957	0.65907	Increase
128	ENSMUSG00000000958	14	54606899	54655237	Slc7a7	Slc7a7	solute carrier family 7 (cationic amino acid transporter, y+ system), member 7 [Source:MGI Symbol;Acc:MGI:1337120]	48338	-0.612911	-1.23013	0.223144	0.915158	Decrease	nonDE	0.0867515	0.170252	0.865348	0.986688	Increase	nonDE	-0.484689	-0.940994	0.35024	0.77833	Decrease	nonDE	-0.0414711	-0.0782124	0.937903	0.984594	Decrease	nonDE	-0.0248445	-0.0502069	0.960114	0.999557	Decrease	nonDE	-0.796652	-1.59327	0.116017	0.866088	Decrease	nonDE	-0.613569	-1.21129	0.23023	0.514457	Decrease
129	ENSMUSG00000000959	14	54598291	54607130	Oxa1l	Oxa1l	oxidase assembly 1-like [Source:MGI Symbol;Acc:MGI:1916339]	8839	0.097234	0.657292	0.513346	0.962951	Increase	nonDE	0.231463	1.43355	0.156559	0.868326	Increase	nonDE	0.400997	2.43972	0.0174747	0.475109	Increase	nonDE	-0.0723004	-0.406441	0.685772	0.913751	Decrease	nonDE	-0.00433408	-0.0317977	0.974732	0.999557	Decrease	nonDE	0.0762825	0.520468	0.60453	0.984457	Increase	nonDE	0.00209434	0.0140827	0.988808	0.995939	Increase
130	ENSMUSG00000000976	11	83644522	83674580	Heatr6	Heatr6	HEAT repeat containing 6 [Source:MGI Symbol;Acc:MGI:1919790]	30058	0.0177549	0.10307	0.918229	0.994099	Increase	nonDE	0.0294731	0.162907	0.871104	0.986868	Increase	nonDE	0.224577	1.21171	0.23007	0.708818	Increase	nonDE	-0.177349	-0.910124	0.366166	0.785769	Decrease	nonDE	0.0948002	0.599385	0.551028	0.999557	Increase	nonDE	-0.118431	-0.704778	0.483501	0.975723	Decrease	nonDE	-0.00485826	-0.0286659	0.97722	0.992705	Decrease
131	ENSMUSG00000000983	11	83599841	83602174	Wfdc18	Wfdc18	WAP four-disulfide core domain 18 [Source:MGI Symbol;Acc:MGI:107506]	2333	-0.916381	-1.67147	0.0995025	0.914925	Decrease	nonDE	0.886879	1.56411	0.122713	0.866234	Increase	nonDE	-0.241068	-0.416776	0.678234	0.913772	Decrease	nonDE	0.211566	0.3521	0.725918	0.924951	Increase	nonDE	-1.23098	-2.23186	0.0291257	0.999557	Decrease	nonDE	0.474387	0.847489	0.399875	0.962487	Increase	nonDE	-0.582183	-0.995988	0.323	0.605043	Decrease
132	ENSMUSG00000001016	3	90383433	90395686	Ilf2	Ilf2	interleukin enhancer binding factor 2 [Source:MGI Symbol;Acc:MGI:1915031]	12253	0.123563	0.85191	0.397435	0.94725	Increase	nonDE	-0.228691	-1.52721	0.131627	0.866234	Decrease	nonDE	0.126743	0.828998	0.410181	0.803417	Increase	nonDE	-0.23187	-1.46222	0.148564	0.686998	Decrease	nonDE	-0.268352	-1.98451	0.0514813	0.999557	Decrease	nonDE	0.0734192	0.523283	0.602581	0.984457	Increase	nonDE	-0.306476	-2.12186	0.0377189	0.229912	Decrease
133	ENSMUSG00000001017	3	90406263	90416805	Chtop	Chtop	chromatin target of PRMT1 [Source:MGI Symbol;Acc:MGI:1913761]	10542	0.00136824	0.0153098	0.987833	0.997312	Increase	nonDE	0.104514	1.11317	0.269792	0.899364	Increase	nonDE	0.0923879	0.981788	0.329894	0.770178	Increase	nonDE	0.0134947	0.136093	0.892174	0.970748	Increase	nonDE	0.0810696	0.95107	0.34514	0.999557	Increase	nonDE	-0.0690442	-0.769234	0.444579	0.974528	Decrease	nonDE	-0.0526631	-0.583021	0.561924	0.779718	Decrease
134	ENSMUSG00000001018	3	90395333	90398340	Snapin	Snapin	SNAP-associated protein [Source:MGI Symbol;Acc:MGI:1333745]	3007	-0.00104295	-0.00910331	0.992765	0.998565	Decrease	nonDE	-0.0864286	-0.731682	0.467029	0.930733	Decrease	nonDE	-0.209736	-1.78906	0.0783285	0.590291	Decrease	nonDE	0.122265	1.00482	0.318761	0.7619	Increase	nonDE	-0.332947	-3.10848	0.00280332	0.999557	Decrease	nonDE	-0.00640353	-0.0585921	0.953459	0.999888	Decrease	nonDE	-0.350367	-3.04425	0.00338102	0.0889096	Decrease
135	ENSMUSG00000001020	3	90511078	90513352	S100a4	S100a4	S100 calcium binding protein A4 [Source:MGI Symbol;Acc:MGI:1330282]	2274	-0.665016	-1.1739	0.244776	0.919545	Decrease	nonDE	-0.126336	-0.221898	0.825098	0.983804	Decrease	nonDE	-0.154548	-0.258691	0.796702	0.951329	Decrease	nonDE	-0.636804	-1.05273	0.296417	0.752803	Decrease	nonDE	-1.26124	-2.24631	0.0281358	0.999557	Decrease	nonDE	-0.274191	-0.499832	0.618904	0.98751	Decrease	nonDE	-1.61793	-2.7916	0.0069029	0.118255	Decrease
136	ENSMUSG00000001025	3	90520189	90531488	S100a6	S100a6	S100 calcium binding protein A6 (calcyclin) [Source:MGI Symbol;Acc:MGI:1339467]	11299	-0.0091858	-0.0503213	0.960023	0.995525	Decrease	nonDE	-0.105567	-0.561362	0.576508	0.951057	Decrease	nonDE	0.000100694	0.000527702	0.999581	0.999886	Increase	nonDE	-0.114854	-0.581142	0.563182	0.866958	Decrease	nonDE	-0.107867	-0.633056	0.528948	0.999557	Decrease	nonDE	-0.237733	-1.36494	0.177042	0.899859	Decrease	nonDE	-0.416367	-2.33991	0.0224137	0.183425	Decrease
137	ENSMUSG00000001029	11	106268482	106278901	Icam2	Icam2	intercellular adhesion molecule 2 [Source:MGI Symbol;Acc:MGI:96394]	10419	0.919875	2.43889	0.0175111	0.914925	Increase	nonDE	-1.03344	-2.64175	0.0103507	0.857116	Decrease	nonDE	-0.2102	-0.586181	0.559812	0.868339	Decrease	nonDE	0.0966363	0.256675	0.798251	0.94823	Increase	nonDE	0.24906	0.800212	0.426543	0.999557	Increase	nonDE	-0.489128	-1.53177	0.130498	0.872739	Decrease	nonDE	0.524766	1.49618	0.139513	0.408753	Increase
138	ENSMUSG00000001034	11	61379638	61385232	Mapk7	Mapk7	mitogen-activated protein kinase 7 [Source:MGI Symbol;Acc:MGI:1346347]	5594	0.306935	0.996333	0.322834	0.931718	Increase	nonDE	-0.122012	-0.367201	0.714678	0.969344	Decrease	nonDE	0.599603	1.73254	0.0879856	0.603379	Increase	nonDE	-0.414679	-1.11963	0.267049	0.741674	Decrease	nonDE	0.3152	1.10569	0.272991	0.999557	Increase	nonDE	-0.160016	-0.512409	0.610126	0.985197	Decrease	nonDE	0.208635	0.672542	0.503655	0.743527	Increase
139	ENSMUSG00000001036	11	61408075	61470513	Epn2	Epn2	epsin 2 [Source:MGI Symbol;Acc:MGI:1333766]	62438	0.0666475	0.664675	0.508642	0.962951	Increase	nonDE	-0.0513927	-0.492549	0.624014	0.959124	Decrease	nonDE	0.0407787	0.390925	0.697148	0.919006	Increase	nonDE	-0.0255239	-0.233998	0.815732	0.953522	Decrease	nonDE	0.00739207	0.0788662	0.937385	0.999557	Increase	nonDE	0.00642052	0.0651434	0.948262	0.999888	Increase	nonDE	0.0446551	0.44395	0.658573	0.84041	Increase
140	ENSMUSG00000001039	11	61395970	61403757	B9d1	B9d1	B9 protein domain 1 [Source:MGI Symbol;Acc:MGI:1351471]	7787	-0.243689	-0.733223	0.466094	0.958877	Decrease	nonDE	-0.228204	-0.695822	0.489055	0.933225	Decrease	nonDE	0.332709	0.875618	0.384506	0.793908	Increase	nonDE	-0.804603	-2.12358	0.0375695	0.659766	Decrease	nonDE	-0.256442	-0.757193	0.451708	0.999557	Decrease	nonDE	-0.465685	-1.41917	0.160692	0.892423	Decrease	nonDE	-0.800521	-2.36144	0.0212537	0.18043	Decrease
141	ENSMUSG00000001052	3	129776408	129855202	Sec24b	Sec24b	Sec24 related gene family, member B (S. cerevisiae) [Source:MGI Symbol;Acc:MGI:2139764]	78794	0.163373	0.902949	0.369933	0.944702	Increase	nonDE	0.0296028	0.154225	0.877917	0.986996	Increase	nonDE	-0.0878326	-0.479285	0.633366	0.892905	Decrease	nonDE	0.280808	1.43515	0.156104	0.689829	Increase	nonDE	0.0723961	0.45975	0.647251	0.999557	Increase	nonDE	0.274043	1.57735	0.119636	0.866124	Increase	nonDE	0.159004	0.908679	0.366922	0.643231	Increase
142	ENSMUSG00000001053	11	51533890	51541669	N4bp3	N4bp3	NEDD4 binding protein 3 [Source:MGI Symbol;Acc:MGI:2442218]	7779	-0.472562	-1.83595	0.0710018	0.914925	Decrease	nonDE	0.319126	1.22436	0.225297	0.889543	Increase	nonDE	-0.509066	-1.89634	0.0624227	0.571947	Decrease	nonDE	0.35563	1.29912	0.198556	0.706665	Increase	nonDE	0.0578117	0.252715	0.801297	0.999557	Increase	nonDE	0.0439158	0.176286	0.860625	0.995883	Increase	nonDE	0.295649	1.09256	0.278677	0.5627	Increase
143	ENSMUSG00000001054	11	51514498	51526723	Rmnd5b	Rmnd5b	required for meiotic nuclear division 5 homolog B [Source:MGI Symbol;Acc:MGI:1913339]	12225	0.0806524	0.482102	0.631375	0.975135	Increase	nonDE	0.129581	0.722865	0.472391	0.930733	Increase	nonDE	0.426353	2.26978	0.0265914	0.512631	Increase	nonDE	-0.21612	-1.08071	0.283874	0.749694	Decrease	nonDE	0.106865	0.684833	0.495917	0.999557	Increase	nonDE	0.0589586	0.348487	0.728616	0.992561	Increase	nonDE	0.395272	2.2292	0.0293113	0.205574	Increase
144	ENSMUSG00000001056	11	51510562	51514541	Nhp2	Nhp2	NHP2 ribonucleoprotein [Source:MGI Symbol;Acc:MGI:1098547]	3979	-0.28601	-1.07447	0.286638	0.921902	Decrease	nonDE	-0.0441037	-0.165417	0.869137	0.986868	Decrease	nonDE	-0.183303	-0.642665	0.522733	0.854434	Decrease	nonDE	-0.146811	-0.509983	0.611814	0.886146	Decrease	nonDE	0.185211	0.826457	0.41161	0.999557	Increase	nonDE	-0.493988	-2.151	0.0352505	0.764706	Decrease	nonDE	-0.263964	-1.1343	0.26089	0.545412	Decrease
145	ENSMUSG00000001062	8	123969095	123981087	Vps9d1	Vps9d1	VPS9 domain containing 1 [Source:MGI Symbol;Acc:MGI:1914143]	11992	0.192452	1.09695	0.276766	0.920945	Increase	nonDE	-0.336152	-1.87291	0.0656408	0.857116	Decrease	nonDE	0.444025	2.2666	0.0267965	0.512705	Increase	nonDE	-0.587725	-2.92436	0.00476639	0.659766	Decrease	nonDE	0.0943068	0.594496	0.554272	0.999557	Increase	nonDE	-0.17359	-1.04171	0.301458	0.944706	Decrease	nonDE	-0.069586	-0.408695	0.684125	0.855394	Decrease
146	ENSMUSG00000001065	8	123980934	123996484	Zfp276	Zfp276	zinc finger protein (C2H2 type) 276 [Source:MGI Symbol;Acc:MGI:1888495]	15550	-0.765893	-2.07399	0.0421007	0.914925	Decrease	nonDE	-0.016352	-0.0469863	0.96267	0.997115	Decrease	nonDE	-0.776136	-2.02454	0.0470836	0.550413	Decrease	nonDE	-0.00610944	-0.0166902	0.986736	0.998324	Decrease	nonDE	0.191813	0.542713	0.589209	0.999557	Increase	nonDE	-0.0505905	-0.13232	0.895145	0.997348	Decrease	nonDE	-0.488029	-1.40644	0.164422	0.441642	Decrease
147	ENSMUSG00000001082	5	34790986	34794556	Mfsd10	Mfsd10	major facilitator superfamily domain containing 10 [Source:MGI Symbol;Acc:MGI:1915544]	3570	-0.448881	-1.17017	0.246263	0.919545	Decrease	nonDE	0.0677894	0.175057	0.861586	0.985869	Increase	nonDE	-0.376991	-0.944664	0.348377	0.778066	Decrease	nonDE	-0.00410043	-0.010104	0.99197	0.998569	Decrease	nonDE	0.0206826	0.0681598	0.94587	0.999557	Increase	nonDE	0.314635	0.930343	0.355683	0.953827	Increase	nonDE	0.0237056	0.0704214	0.944077	0.977768	Increase
148	ENSMUSG00000001089	4	136197072	136282091	Luzp1	Luzp1	leucine zipper protein 1 [Source:MGI Symbol;Acc:MGI:107629]	85019	0.0253536	0.197239	0.844265	0.990771	Increase	nonDE	-0.128919	-0.972973	0.334223	0.910032	Decrease	nonDE	0.109501	0.811154	0.420278	0.807513	Increase	nonDE	-0.213066	-1.52351	0.132548	0.677809	Decrease	nonDE	-0.0180727	-0.153324	0.878624	0.999557	Decrease	nonDE	0.172675	1.37316	0.174486	0.899859	Increase	nonDE	0.308548	2.38327	0.0201323	0.176349	Increase
149	ENSMUSG00000001098	5	114501628	114518569	Kctd10	Kctd10	potassium channel tetramerisation domain containing 10 [Source:MGI Symbol;Acc:MGI:2141207]	16941	-0.140587	-0.573865	0.568067	0.971727	Decrease	nonDE	0.0512358	0.201702	0.840788	0.984929	Increase	nonDE	-0.0831606	-0.315638	0.753302	0.937439	Decrease	nonDE	-0.00619037	-0.0225964	0.982042	0.997341	Decrease	nonDE	-0.111812	-0.501147	0.617984	0.999557	Decrease	nonDE	0.143446	0.601732	0.549474	0.982727	Increase	nonDE	-0.0817833	-0.327927	0.744035	0.887481	Decrease
150	ENSMUSG00000001100	11	78403019	78413562	Poldip2	Poldip2	polymerase (DNA-directed), delta interacting protein 2 [Source:MGI Symbol;Acc:MGI:1915061]	10543	0.122369	0.950264	0.345546	0.940333	Increase	nonDE	-0.0152918	-0.112712	0.910611	0.991146	Decrease	nonDE	0.214416	1.57159	0.120967	0.638217	Increase	nonDE	-0.107339	-0.74517	0.458892	0.825164	Decrease	nonDE	-0.0259156	-0.216684	0.829142	0.999557	Decrease	nonDE	-0.0429536	-0.342899	0.732796	0.992561	Decrease	nonDE	0.225432	1.7099	0.0921203	0.338516	Increase
151	ENSMUSG00000001103	11	78394273	78395907	Sebox	Sebox	SEBOX homeobox [Source:MGI Symbol;Acc:MGI:108012]	1634	0.00702661	0.0128585	0.989781	0.997684	Increase	nonDE	-0.25436	-0.454286	0.651157	0.960901	Decrease	nonDE	-0.425951	-0.771756	0.443094	0.817493	Decrease	nonDE	0.178618	0.31343	0.754972	0.935423	Increase	nonDE	-0.53511	-1.02923	0.307236	0.999557	Decrease	nonDE	0.113936	0.214827	0.830584	0.995435	Increase	nonDE	-0.714727	-1.32253	0.190688	0.471177	Decrease
152	ENSMUSG00000001105	11	78427187	78432563	Ift20	Ift20	intraflagellar transport 20 [Source:MGI Symbol;Acc:MGI:1915585]	5376	-0.229896	-1.41418	0.162145	0.914925	Decrease	nonDE	0.185125	1.09243	0.278733	0.90104	Increase	nonDE	0.191037	1.0825	0.283083	0.743903	Increase	nonDE	-0.235807	-1.28	0.205156	0.709441	Decrease	nonDE	-0.0325074	-0.206453	0.837091	0.999557	Decrease	nonDE	-0.235425	-1.45439	0.150716	0.892193	Decrease	nonDE	-0.425852	-2.62602	0.0107915	0.137419	Decrease
153	ENSMUSG00000001119	10	76544626	76562002	Col6a1	Col6a1	collagen, type VI, alpha 1 [Source:MGI Symbol;Acc:MGI:88459]	17376	-0.326156	-0.548011	0.585587	0.973503	Decrease	nonDE	-0.661134	-1.12724	0.263843	0.898505	Decrease	nonDE	-0.69425	-1.14399	0.256881	0.727637	Decrease	nonDE	-0.29304	-0.48562	0.628892	0.892512	Decrease	nonDE	0.171253	0.294433	0.769378	0.999557	Increase	nonDE	-0.678261	-1.14983	0.254485	0.927393	Decrease	nonDE	-0.486484	-0.819287	0.415657	0.68169	Decrease
154	ENSMUSG00000001120	10	76597691	76797721	Pcbp3	Pcbp3	poly(rC) binding protein 3 [Source:MGI Symbol;Acc:MGI:1890470]	200030	0.0387511	0.225631	0.822206	0.989901	Increase	nonDE	-0.100187	-0.563249	0.57523	0.950916	Decrease	nonDE	0.27872	1.49555	0.139678	0.653077	Increase	nonDE	-0.340156	-1.75818	0.0834892	0.662099	Decrease	nonDE	-0.160054	-1.03591	0.304135	0.999557	Decrease	nonDE	-0.107993	-0.678213	0.500077	0.978155	Decrease	nonDE	0.0908727	0.530042	0.597913	0.804495	Increase
155	ENSMUSG00000001123	11	78853800	78875772	Lgals9	Lgals9	lectin, galactose binding, soluble 9 [Source:MGI Symbol;Acc:MGI:109496]	21972	-0.625271	-1.28193	0.204482	0.914925	Decrease	nonDE	0.338492	0.678016	0.500201	0.935013	Increase	nonDE	-0.783531	-1.57096	0.121113	0.638795	Decrease	nonDE	0.496753	0.966211	0.337569	0.770017	Increase	nonDE	0.242632	0.5122	0.610271	0.999557	Increase	nonDE	-0.101054	-0.202683	0.840024	0.995657	Decrease	nonDE	1.09082	2.11112	0.0386662	0.231688	Increase
156	ENSMUSG00000001127	X	20664053	20726758	Araf	Araf	Araf proto-oncogene, serine/threonine kinase [Source:MGI Symbol;Acc:MGI:88065]	62705	0.16126	0.364466	0.716709	0.985902	Increase	nonDE	-0.333568	-0.741157	0.461304	0.930587	Decrease	nonDE	-0.792832	-1.91633	0.0597827	0.570131	Decrease	nonDE	0.620523	1.45793	0.149742	0.687301	Increase	nonDE	0.121758	0.295119	0.768856	0.999557	Increase	nonDE	0.0688605	0.156187	0.876377	0.995883	Increase	nonDE	-0.461148	-1.08196	0.283325	0.566256	Decrease
157	ENSMUSG00000001128	X	20791693	20797794	Cfp	Cfp	complement factor properdin [Source:MGI Symbol;Acc:MGI:97545]	6101	0.980385	1.90869	0.0607801	0.914925	Increase	nonDE	-0.0704652	-0.122562	0.902837	0.98932	Decrease	nonDE	0.801888	1.50982	0.136001	0.65086	Increase	nonDE	0.108032	0.1816	0.85647	0.96313	Increase	nonDE	0.101672	0.209742	0.834534	0.999557	Increase	nonDE	0.0216225	0.0410533	0.967381	0.999888	Increase	nonDE	0.197007	0.374735	0.709094	0.870339	Increase
158	ENSMUSG00000001134	X	20807961	20828256	Uxt	Uxt	ubiquitously expressed prefoldin like chaperone [Source:MGI Symbol;Acc:MGI:1277988]	20295	-0.251391	-0.522087	0.603409	0.974472	Decrease	nonDE	-0.0336768	-0.068707	0.945437	0.995038	Decrease	nonDE	-0.297623	-0.597824	0.552063	0.864776	Decrease	nonDE	0.0125553	0.0246046	0.980447	0.997068	Increase	nonDE	-0.843501	-1.83193	0.0716063	0.999557	Decrease	nonDE	-0.389683	-0.905545	0.368567	0.959159	Decrease	nonDE	-1.25708	-2.66564	0.00971224	0.131856	Decrease
159	ENSMUSG00000001138	1	36550948	36567318	Cnnm3	Cnnm3	cyclin M3 [Source:MGI Symbol;Acc:MGI:2151055]	16370	-0.119215	-0.637239	0.526238	0.963931	Decrease	nonDE	-0.0856959	-0.447256	0.656198	0.961104	Decrease	nonDE	-0.033564	-0.169045	0.866294	0.96836	Decrease	nonDE	-0.171347	-0.838311	0.40497	0.804625	Decrease	nonDE	0.107584	0.655123	0.514732	0.999557	Increase	nonDE	0.0731868	0.413444	0.680661	0.991008	Increase	nonDE	0.207981	1.1457	0.256179	0.540835	Increase
160	ENSMUSG00000001143	1	36458952	36484352	Lman2l	Lman2l	lectin, mannose-binding 2-like [Source:MGI Symbol;Acc:MGI:2443010]	25400	-0.0877707	-0.514564	0.608627	0.974472	Decrease	nonDE	0.0520418	0.292	0.771229	0.976804	Increase	nonDE	0.0161295	0.0883937	0.929839	0.983972	Increase	nonDE	-0.0518584	-0.271389	0.786963	0.945457	Decrease	nonDE	-0.0350825	-0.213444	0.831658	0.999557	Decrease	nonDE	0.0932306	0.525918	0.600759	0.984457	Increase	nonDE	0.0182321	0.10152	0.919455	0.96785	Increase
161	ENSMUSG00000001150	10	76304761	76351691	Mcm3ap	Mcm3ap	minichromosome maintenance complex component 3 associated protein [Source:MGI Symbol;Acc:MGI:1930089]	46930	0.293577	1.68019	0.0977861	0.914925	Increase	nonDE	-0.263168	-1.44794	0.152506	0.868326	Decrease	nonDE	0.219723	1.21282	0.229648	0.708818	Increase	nonDE	-0.189314	-0.999451	0.321333	0.762845	Decrease	nonDE	0.129897	0.871633	0.386661	0.999557	Increase	nonDE	-0.0288374	-0.181563	0.856499	0.995883	Decrease	nonDE	0.330782	2.01162	0.0484668	0.253919	Increase
162	ENSMUSG00000001151	10	76187097	76278620	Pcnt	Pcnt	pericentrin (kendrin) [Source:MGI Symbol;Acc:MGI:102722]	91523	0.0940403	0.649623	0.518256	0.962951	Increase	nonDE	0.122411	0.797093	0.428339	0.925602	Increase	nonDE	0.258075	1.67294	0.0992109	0.616604	Increase	nonDE	-0.0416227	-0.254135	0.800204	0.94858	Decrease	nonDE	0.0963032	0.719909	0.474197	0.999557	Increase	nonDE	0.186416	1.28955	0.201839	0.908448	Increase	nonDE	0.201563	1.3909	0.169064	0.446555	Increase
163	ENSMUSG00000001156	6	86624024	86646143	Mxd1	Mxd1	MAX dimerization protein 1 [Source:MGI Symbol;Acc:MGI:96908]	22119	-0.121777	-0.759264	0.450477	0.955557	Decrease	nonDE	0.0358134	0.215377	0.830157	0.984149	Increase	nonDE	-0.077023	-0.456096	0.649862	0.901172	Decrease	nonDE	-0.00894024	-0.0508439	0.959608	0.992426	Decrease	nonDE	-0.0612565	-0.406076	0.686038	0.999557	Decrease	nonDE	-0.109996	-0.699978	0.486473	0.97719	Decrease	nonDE	-0.371761	-2.35711	0.0214823	0.181138	Decrease
164	ENSMUSG00000001157	6	86668750	86710365	Gmcl1	Gmcl1	germ cell-less, spermatogenesis associated 1 [Source:MGI Symbol;Acc:MGI:1345156]	41615	0.28846	1.90451	0.0613322	0.914925	Increase	nonDE	-0.311204	-1.98044	0.0519476	0.857116	Decrease	nonDE	0.0316754	0.205335	0.837961	0.9603	Increase	nonDE	-0.0544192	-0.33777	0.73664	0.928	Decrease	nonDE	0.047462	0.354259	0.724307	0.999557	Increase	nonDE	0.197425	1.35957	0.178729	0.899859	Increase	nonDE	0.0753972	0.519245	0.605378	0.808565	Increase
165	ENSMUSG00000001158	6	86652133	86661504	Snrnp27	Snrnp27	small nuclear ribonucleoprotein 27 (U4/U6.U5) [Source:MGI Symbol;Acc:MGI:1913868]	9371	-0.00312949	-0.0152464	0.987883	0.997312	Decrease	nonDE	-0.103593	-0.487252	0.627741	0.959124	Decrease	nonDE	-0.0595967	-0.279893	0.78046	0.947096	Decrease	nonDE	-0.0471254	-0.212517	0.832378	0.956624	Decrease	nonDE	-0.193401	-1.02319	0.310062	0.999557	Decrease	nonDE	-0.232736	-1.21059	0.230494	0.925431	Decrease	nonDE	-0.194612	-0.961863	0.339732	0.619345	Decrease
166	ENSMUSG00000001166	5	120938259	120950579	Oas1c	Oas1c	2'-5' oligoadenylate synthetase 1C [Source:MGI Symbol;Acc:MGI:2149633]	12320	-0.355419	-0.724592	0.471338	0.959726	Decrease	nonDE	0.202951	0.401592	0.689319	0.966615	Increase	nonDE	-0.293425	-0.579644	0.564186	0.868574	Decrease	nonDE	0.140956	0.268602	0.789098	0.946079	Increase	nonDE	0.240112	0.494629	0.622553	0.999557	Increase	nonDE	-0.445529	-0.891706	0.375884	0.962347	Decrease	nonDE	-0.260876	-0.523398	0.602501	0.806954	Decrease
167	ENSMUSG00000001173	X	47001264	47054745	Ocrl	Ocrl	OCRL, inositol polyphosphate-5-phosphatase [Source:MGI Symbol;Acc:MGI:109589]	53481	0.0450749	0.248938	0.804205	0.989199	Increase	nonDE	0.0745648	0.392366	0.696089	0.966626	Increase	nonDE	-0.131232	-0.705818	0.482858	0.836798	Decrease	nonDE	0.250872	1.27862	0.205639	0.70955	Increase	nonDE	0.191217	1.11579	0.268678	0.999557	Increase	nonDE	0.219282	1.1661	0.247894	0.927393	Increase	nonDE	0.143925	0.777339	0.439817	0.698358	Increase
168	ENSMUSG00000001175	12	100165694	100176073	Calm1	Calm1	calmodulin 1 [Source:MGI Symbol;Acc:MGI:88251]	10379	-0.0403196	-0.657607	0.513144	0.962951	Decrease	nonDE	-0.0111788	-0.175821	0.860989	0.985869	Decrease	nonDE	0.0183183	0.285014	0.776552	0.946072	Increase	nonDE	-0.0698167	-1.04271	0.300996	0.753657	Decrease	nonDE	-0.0625499	-1.0899	0.279836	0.999557	Decrease	nonDE	-0.0985471	-1.65406	0.103004	0.852426	Decrease	nonDE	0.000472999	0.00765266	0.993918	0.997936	Increase
169	ENSMUSG00000001211	10	78105012	78188323	Agpat3	Agpat3	1-acylglycerol-3-phosphate O-acyltransferase 3 [Source:MGI Symbol;Acc:MGI:1336186]	83311	0.153491	1.51836	0.133839	0.914925	Increase	nonDE	-0.209691	-2.0088	0.0487731	0.857116	Decrease	nonDE	0.178273	1.68497	0.096856	0.612848	Increase	nonDE	-0.234472	-2.1353	0.0365623	0.659766	Decrease	nonDE	0.0602926	0.642629	0.522756	0.999557	Increase	nonDE	0.000701949	0.00708562	0.994369	0.999888	Increase	nonDE	0.215295	2.11428	0.0383849	0.231375	Increase
170	ENSMUSG00000001225	12	31440870	31523916	Slc26a3	Slc26a3	solute carrier family 26, member 3 [Source:MGI Symbol;Acc:MGI:107181]	83046	0.0875764	0.126013	0.900116	0.994099	Increase	nonDE	0.955826	1.15542	0.252205	0.896322	Increase	nonDE	-0.320995	-0.475483	0.636059	0.894339	Decrease	nonDE	1.3644	1.6713	0.0995364	0.669697	Increase	nonDE	-0.445365	-0.528266	0.599138	0.999557	Decrease	nonDE	-0.138088	-0.163026	0.87101	0.995883	Decrease	nonDE	-1.82104	-2.36026	0.021316	0.180549	Decrease
171	ENSMUSG00000001227	17	56430085	56447343	Sema6b	Sema6b	sema domain, transmembrane domain (TM), and cytoplasmic domain, (semaphorin) 6B [Source:MGI Symbol;Acc:MGI:1202889]	17258	-0.209278	-0.86195	0.391927	0.946367	Decrease	nonDE	0.226584	0.885561	0.379163	0.916342	Increase	nonDE	0.0671216	0.245923	0.806528	0.952899	Increase	nonDE	-0.0498148	-0.173769	0.862595	0.96457	Decrease	nonDE	0.104295	0.463835	0.644337	0.999557	Increase	nonDE	-0.33058	-1.43133	0.157192	0.892423	Decrease	nonDE	0.0879975	0.349717	0.727697	0.87839	Increase
172	ENSMUSG00000001229	17	56493807	56525905	Dpp9	Dpp9	dipeptidylpeptidase 9 [Source:MGI Symbol;Acc:MGI:2443967]	32098	0.311188	1.55785	0.124191	0.914925	Increase	nonDE	0.028435	0.131141	0.896074	0.98888	Increase	nonDE	0.601141	2.67903	0.00937058	0.455927	Increase	nonDE	-0.261517	-1.08343	0.282677	0.748755	Decrease	nonDE	0.189357	1.12298	0.265632	0.999557	Increase	nonDE	0.594246	2.94796	0.00445774	0.721732	Increase	nonDE	1.06921	4.76859	1.10812e-05	0.0176188	Increase
173	ENSMUSG00000001240	11	101136854	101150372	Ramp2	Ramp2	receptor (calcitonin) activity modifying protein 2 [Source:MGI Symbol;Acc:MGI:1859650]	13518	0.203975	0.646651	0.520166	0.962951	Increase	nonDE	-0.538914	-1.72608	0.0891481	0.857116	Decrease	nonDE	-0.0318312	-0.100028	0.920634	0.980937	Decrease	nonDE	-0.303108	-0.954139	0.343597	0.771938	Decrease	nonDE	0.219692	0.867445	0.388933	0.999557	Increase	nonDE	-0.228622	-0.848965	0.399059	0.962487	Decrease	nonDE	0.525618	1.77351	0.080893	0.318184	Increase
174	ENSMUSG00000001247	7	30657195	30672889	Lsr	Lsr	lipolysis stimulated lipoprotein receptor [Source:MGI Symbol;Acc:MGI:1927471]	15694	0.0815276	0.222376	0.824728	0.989901	Increase	nonDE	0.0402956	0.102944	0.918328	0.992104	Increase	nonDE	0.0761766	0.191684	0.848595	0.962514	Increase	nonDE	0.0456465	0.107787	0.914502	0.977128	Increase	nonDE	0.316543	1.05098	0.297211	0.999557	Increase	nonDE	-0.265401	-0.822276	0.413967	0.965421	Decrease	nonDE	0.537062	1.55192	0.125603	0.389976	Increase
175	ENSMUSG00000001248	7	30829552	30855321	Gramd1a	Gramd1a	GRAM domain containing 1A [Source:MGI Symbol;Acc:MGI:105490]	25769	-0.0973067	-0.477813	0.634408	0.975135	Decrease	nonDE	0.0956564	0.447278	0.656182	0.961104	Increase	nonDE	-0.0310956	-0.144031	0.885928	0.971739	Decrease	nonDE	0.0294453	0.12956	0.89732	0.972102	Increase	nonDE	-0.172816	-0.914084	0.364097	0.999557	Decrease	nonDE	-0.0235979	-0.120514	0.904453	0.997669	Decrease	nonDE	-0.0613033	-0.289035	0.773487	0.903464	Decrease
176	ENSMUSG00000001249	7	30798150	30814715	Hpn	Hpn	hepsin [Source:MGI Symbol;Acc:MGI:1196620]	16565	-0.356308	-0.669519	0.505568	0.962857	Decrease	nonDE	0.388124	0.704537	0.483649	0.93229	Increase	nonDE	-0.00833624	-0.0149789	0.988096	0.997893	Decrease	nonDE	0.0401517	0.0693528	0.944925	0.987227	Increase	nonDE	-0.294153	-0.554246	0.581339	0.999557	Decrease	nonDE	0.440173	0.795876	0.429041	0.970368	Increase	nonDE	-0.826104	-1.522	0.132927	0.399155	Decrease
177	ENSMUSG00000001260	5	70908390	70999960	Gabrg1	Gabrg1	gamma-aminobutyric acid (GABA) A receptor, subunit gamma 1 [Source:MGI Symbol;Acc:MGI:103156]	91570	-0.172012	-0.791386	0.431636	0.955172	Decrease	nonDE	0.143159	0.631387	0.530032	0.93752	Increase	nonDE	-0.384697	-1.74668	0.0854809	0.597956	Decrease	nonDE	0.355843	1.53814	0.128935	0.674283	Increase	nonDE	-0.0372859	-0.170109	0.86546	0.999557	Decrease	nonDE	-0.274602	-1.23035	0.223062	0.921066	Decrease	nonDE	-0.677932	-3.09009	0.00295854	0.0854749	Decrease
178	ENSMUSG00000001270	12	111635795	111638772	Ckb	Ckb	creatine kinase, brain [Source:MGI Symbol;Acc:MGI:88407]	2977	0.174585	2.21777	0.0301202	0.914925	Increase	nonDE	-0.097592	-1.18694	0.239631	0.892473	Decrease	nonDE	0.155225	1.89318	0.0628486	0.573998	Increase	nonDE	-0.0782317	-0.909431	0.366528	0.786205	Decrease	nonDE	0.0742549	1.03007	0.306845	0.999557	Increase	nonDE	0.0711107	0.92808	0.356847	0.955518	Increase	nonDE	0.275932	3.51484	0.000813049	0.0519436	Increase
179	ENSMUSG00000001280	15	102314578	102344839	Sp1	Sp1	trans-acting transcription factor 1 [Source:MGI Symbol;Acc:MGI:98372]	30261	0.0365113	0.294485	0.769339	0.986803	Increase	nonDE	0.0982731	0.751342	0.455196	0.930273	Increase	nonDE	-0.1224	-0.962891	0.33922	0.774751	Decrease	nonDE	0.257184	1.90764	0.0609185	0.659766	Increase	nonDE	0.0559933	0.483638	0.63029	0.999557	Increase	nonDE	-0.00796327	-0.0650613	0.948328	0.999888	Decrease	nonDE	0.0989437	0.787822	0.433704	0.69519	Increase
180	ENSMUSG00000001281	15	102124430	102140379	Itgb7	Itgb7	integrin beta 7 [Source:MGI Symbol;Acc:MGI:96616]	15949	0.0671903	0.135022	0.893017	0.994099	Increase	nonDE	0.629749	1.17347	0.244947	0.895825	Increase	nonDE	1.04082	1.9372	0.0571285	0.565645	Increase	nonDE	-0.343879	-0.595126	0.553854	0.86463	Decrease	nonDE	-0.604076	-1.25079	0.215555	0.999557	Decrease	nonDE	0.470729	0.936853	0.35235	0.953432	Increase	nonDE	-0.550485	-1.06892	0.289113	0.571841	Decrease
181	ENSMUSG00000001285	15	102240144	102246574	Myg1	Myg1	melanocyte proliferating gene 1 [Source:MGI Symbol;Acc:MGI:1929864]	6430	-0.193377	-0.924611	0.358635	0.943914	Decrease	nonDE	0.0360321	0.167451	0.867542	0.986868	Increase	nonDE	0.191206	0.814829	0.418186	0.806324	Increase	nonDE	-0.34855	-1.44145	0.154325	0.687976	Decrease	nonDE	-0.00562371	-0.0268081	0.978696	0.999557	Decrease	nonDE	-0.342718	-1.6078	0.112792	0.863184	Decrease	nonDE	-0.0655896	-0.282043	0.778819	0.905792	Decrease
182	ENSMUSG00000001288	15	102143373	102165952	Rarg	Rarg	retinoic acid receptor, gamma [Source:MGI Symbol;Acc:MGI:97858]	22579	0.440478	1.58961	0.116841	0.914925	Increase	nonDE	-0.288761	-0.973412	0.334007	0.910032	Decrease	nonDE	0.363147	1.26914	0.208979	0.694012	Increase	nonDE	-0.21143	-0.687792	0.494064	0.840817	Decrease	nonDE	0.146034	0.674374	0.502498	0.999557	Increase	nonDE	0.318534	1.26314	0.211113	0.916045	Increase	nonDE	0.920506	3.244	0.00187356	0.0712471	Increase
183	ENSMUSG00000001289	15	102234551	102240308	Pfdn5	Pfdn5	prefoldin 5 [Source:MGI Symbol;Acc:MGI:1928753]	5757	-0.0603545	-0.505949	0.614627	0.974472	Decrease	nonDE	-0.120252	-0.983585	0.329016	0.908016	Decrease	nonDE	-0.130487	-1.05748	0.294258	0.750244	Decrease	nonDE	-0.0501196	-0.393789	0.695043	0.915208	Decrease	nonDE	-0.130681	-1.16873	0.246841	0.999557	Decrease	nonDE	-0.128315	-1.11582	0.268663	0.93369	Decrease	nonDE	-0.199204	-1.67804	0.0982074	0.348699	Decrease
184	ENSMUSG00000001300	8	8667434	8711242	Efnb2	Efnb2	ephrin B2 [Source:MGI Symbol;Acc:MGI:105097]	43808	0.340761	1.62503	0.109062	0.914925	Increase	nonDE	-0.220755	-0.998855	0.32162	0.907555	Decrease	nonDE	0.401686	1.78748	0.0785865	0.590291	Increase	nonDE	-0.28168	-1.1882	0.239135	0.724449	Decrease	nonDE	0.173061	0.970935	0.335229	0.999557	Increase	nonDE	0.095631	0.48863	0.626771	0.98827	Increase	nonDE	0.325963	1.6502	0.103792	0.356297	Increase
185	ENSMUSG00000001305	1	186453175	186481555	Rrp15	Rrp15	ribosomal RNA processing 15 homolog [Source:MGI Symbol;Acc:MGI:1914473]	28380	0.21756	0.540281	0.590875	0.973503	Increase	nonDE	-0.288633	-0.692849	0.490906	0.933225	Decrease	nonDE	-0.210109	-0.523911	0.602147	0.882365	Decrease	nonDE	0.139036	0.3323	0.740747	0.929421	Increase	nonDE	0.396684	1.1668	0.247612	0.999557	Increase	nonDE	0.0207968	0.0542932	0.95687	0.999888	Increase	nonDE	0.460928	1.24122	0.219048	0.501389	Increase
186	ENSMUSG00000001313	11	101355825	101362679	Rnd2	Rnd2	Rho family GTPase 2 [Source:MGI Symbol;Acc:MGI:1338755]	6854	-0.39111	-2.32385	0.0233153	0.914925	Decrease	nonDE	-0.15996	-0.963377	0.338977	0.912008	Decrease	nonDE	-0.214298	-1.19994	0.234577	0.711233	Decrease	nonDE	-0.336772	-1.89326	0.0628382	0.659766	Decrease	nonDE	-0.00857192	-0.0555342	0.955886	0.999557	Decrease	nonDE	-0.436332	-2.80314	0.00668699	0.721732	Decrease	nonDE	-0.105417	-0.638023	0.525731	0.757671	Decrease
187	ENSMUSG00000001323	11	74797185	74816774	Srr	Srr	serine racemase [Source:MGI Symbol;Acc:MGI:1351636]	19589	-0.0637542	-0.347799	0.729131	0.986466	Decrease	nonDE	-0.0960836	-0.507418	0.613602	0.955695	Decrease	nonDE	0.103438	0.521831	0.603586	0.883564	Increase	nonDE	-0.263275	-1.28197	0.204468	0.708673	Decrease	nonDE	-0.285722	-1.726	0.089164	0.999557	Decrease	nonDE	-0.230714	-1.39724	0.167158	0.895723	Decrease	nonDE	0.150604	0.778822	0.438949	0.697863	Increase
188	ENSMUSG00000001333	4	129181410	129202352	Sync	Sync	syncoilin [Source:MGI Symbol;Acc:MGI:1916078]	20942	0.350794	0.650663	0.517589	0.962951	Increase	nonDE	-0.576298	-1.04187	0.301382	0.907196	Decrease	nonDE	-0.144825	-0.262576	0.793719	0.950195	Decrease	nonDE	-0.0806785	-0.141587	0.88785	0.969331	Decrease	nonDE	-0.407311	-0.760292	0.449866	0.999557	Decrease	nonDE	-0.0595717	-0.10879	0.913709	0.998625	Decrease	nonDE	-0.374997	-0.67361	0.502981	0.743058	Decrease
189	ENSMUSG00000001334	4	129030792	129038386	Fndc5	Fndc5	fibronectin type III domain containing 5 [Source:MGI Symbol;Acc:MGI:1917614]	7594	0.0875832	0.82066	0.41488	0.951609	Increase	nonDE	-0.026313	-0.236112	0.814098	0.982814	Decrease	nonDE	0.256794	2.26993	0.0265816	0.512631	Increase	nonDE	-0.195524	-1.6501	0.103812	0.670439	Decrease	nonDE	0.0627622	0.623163	0.535388	0.999557	Increase	nonDE	-0.072562	-0.686965	0.494582	0.977582	Decrease	nonDE	0.170723	1.56954	0.121445	0.383231	Increase
190	ENSMUSG00000001349	9	22010512	22020926	Cnn1	Cnn1	calponin 1 [Source:MGI Symbol;Acc:MGI:104979]	10414	0.916973	1.83218	0.0721394	0.914925	Increase	nonDE	-1.46919	-2.89912	0.0053014	0.857116	Decrease	nonDE	0.481331	0.936533	0.352942	0.779646	Increase	nonDE	-1.03354	-1.97125	0.0535465	0.659766	Decrease	nonDE	0.834873	1.76004	0.0837544	0.999557	Increase	nonDE	-0.639201	-1.28632	0.20352	0.909037	Decrease	nonDE	1.04768	2.10499	0.0397023	0.233928	Increase
191	ENSMUSG00000001366	9	77988781	78016347	Fbxo9	Fbxo9	f-box protein 9 [Source:MGI Symbol;Acc:MGI:1918788]	27566	-0.132521	-1.38274	0.171543	0.914925	Decrease	nonDE	0.0156625	0.158426	0.874619	0.986868	Increase	nonDE	-0.05771	-0.573364	0.568404	0.869846	Decrease	nonDE	-0.0591483	-0.566853	0.572793	0.871241	Decrease	nonDE	-0.0435272	-0.474097	0.637041	0.999557	Decrease	nonDE	-0.285771	-3.04508	0.00337294	0.721732	Decrease	nonDE	-0.116538	-1.1948	0.236568	0.521591	Decrease
192	ENSMUSG00000001376	6	3498382	3603531	Vps50	Vps50	VPS50 EARP/GARPII complex subunit [Source:MGI Symbol;Acc:MGI:1920538]	105149	-0.287777	-1.67563	0.0986819	0.914925	Decrease	nonDE	0.312424	1.72546	0.0892617	0.857116	Increase	nonDE	-0.185618	-1.02327	0.310026	0.76002	Decrease	nonDE	0.210265	1.09684	0.276816	0.748036	Increase	nonDE	0.0204395	0.128469	0.89818	0.999557	Increase	nonDE	0.194325	1.12497	0.264796	0.93157	Increase	nonDE	-0.254844	-1.52443	0.132319	0.398119	Decrease
193	ENSMUSG00000001380	18	36899581	36916258	Hars	Hars	histidyl-tRNA synthetase [Source:MGI Symbol;Acc:MGI:108087]	16677	-0.0127462	-0.108206	0.91417	0.994099	Decrease	nonDE	0.135609	1.09281	0.278566	0.90104	Increase	nonDE	-0.183014	-1.51229	0.135374	0.65086	Decrease	nonDE	0.305877	2.38686	0.0199534	0.659766	Increase	nonDE	-0.111313	-1.03159	0.306138	0.999557	Decrease	nonDE	0.0268055	0.237279	0.813197	0.994687	Increase	nonDE	-0.109611	-0.942428	0.349511	0.628844	Decrease
194	ENSMUSG00000001383	18	36926929	36932719	Zmat2	Zmat2	zinc finger, matrin type 2 [Source:MGI Symbol;Acc:MGI:1913742]	5790	-0.132884	-0.773085	0.442313	0.955557	Decrease	nonDE	-0.0470176	-0.266187	0.79095	0.979581	Decrease	nonDE	0.160612	0.873365	0.385723	0.794543	Increase	nonDE	-0.340513	-1.79413	0.0775072	0.660017	Decrease	nonDE	-0.189041	-1.17371	0.244853	0.999557	Decrease	nonDE	-0.180789	-1.09801	0.276308	0.939087	Decrease	nonDE	-0.111516	-0.645622	0.520828	0.754538	Decrease
195	ENSMUSG00000001415	3	88243567	88269645	Smg5	Smg5	SMG5 nonsense mediated mRNA decay factor [Source:MGI Symbol;Acc:MGI:2447364]	26078	0.275386	1.74134	0.0864193	0.914925	Increase	nonDE	-0.325184	-1.98122	0.0518581	0.857116	Decrease	nonDE	-0.106945	-0.691982	0.491447	0.839759	Decrease	nonDE	0.0571472	0.352764	0.725423	0.924951	Increase	nonDE	-0.121291	-0.918001	0.362058	0.999557	Decrease	nonDE	0.2138	1.4941	0.140056	0.884235	Increase	nonDE	0.277831	1.81115	0.074802	0.306998	Increase
196	ENSMUSG00000001416	3	88204423	88229074	Cct3	Cct3	chaperonin containing Tcp1, subunit 3 (gamma) [Source:MGI Symbol;Acc:MGI:104708]	24651	-0.0278188	-0.269672	0.788279	0.986922	Decrease	nonDE	0.02537	0.235864	0.81429	0.982814	Increase	nonDE	-0.0962898	-0.900807	0.371062	0.786796	Decrease	nonDE	0.093841	0.83771	0.405305	0.804625	Increase	nonDE	-0.0924787	-0.932853	0.354395	0.999557	Decrease	nonDE	-0.1937	-1.90337	0.0614829	0.809003	Decrease	nonDE	-0.335416	-3.22261	0.00199794	0.0729035	Decrease
197	ENSMUSG00000001418	3	88232330	88238620	Glmp	Glmp	glycosylated lysosomal membrane protein [Source:MGI Symbol;Acc:MGI:1913318]	6290	0.24329	1.14194	0.257725	0.919545	Increase	nonDE	-0.147973	-0.665525	0.508101	0.936291	Decrease	nonDE	0.0901603	0.416214	0.678643	0.91384	Increase	nonDE	0.00515677	0.0226623	0.98199	0.997341	Increase	nonDE	0.0982007	0.535965	0.593837	0.999557	Increase	nonDE	-0.187669	-0.974509	0.333466	0.951231	Decrease	nonDE	0.053196	0.263539	0.79298	0.912734	Increase
198	ENSMUSG00000001419	3	88049679	88079393	Mef2d	Mef2d	myocyte enhancer factor 2D [Source:MGI Symbol;Acc:MGI:99533]	29714	0.215748	1.75951	0.0832607	0.914925	Increase	nonDE	-0.0432099	-0.334815	0.738858	0.973429	Decrease	nonDE	0.189404	1.48285	0.143013	0.654898	Increase	nonDE	-0.0168655	-0.12497	0.900938	0.973139	Decrease	nonDE	0.189436	1.67295	0.0992093	0.999557	Increase	nonDE	-0.00607833	-0.0503837	0.959973	0.999888	Decrease	nonDE	0.240178	1.96399	0.0538691	0.265852	Increase
199	ENSMUSG00000001424	6	28475138	28935161	Snd1	Snd1	staphylococcal nuclease and tudor domain containing 1 [Source:MGI Symbol;Acc:MGI:1929266]	460023	-0.131436	-0.758901	0.450693	0.955557	Decrease	nonDE	-0.204237	-1.16453	0.248525	0.896322	Decrease	nonDE	-0.0208581	-0.112892	0.910469	0.978076	Decrease	nonDE	-0.314815	-1.67211	0.0993757	0.669697	Decrease	nonDE	-0.113974	-0.728652	0.468867	0.999557	Decrease	nonDE	-0.083555	-0.515339	0.608089	0.98511	Decrease	nonDE	-0.171832	-1.02386	0.309747	0.592375	Decrease
200	ENSMUSG00000001435	10	76888012	77002382	Col18a1	Col18a1	collagen, type XVIII, alpha 1 [Source:MGI Symbol;Acc:MGI:88451]	114370	0.145168	0.771152	0.443449	0.955557	Increase	nonDE	-0.246212	-1.26868	0.20914	0.883214	Decrease	nonDE	0.0236096	0.120637	0.904356	0.976282	Increase	nonDE	-0.124653	-0.614381	0.541138	0.861064	Decrease	nonDE	-0.0942751	-0.579782	0.564093	0.999557	Decrease	nonDE	0.14275	0.814219	0.418533	0.967487	Increase	nonDE	0.277128	1.46932	0.146636	0.419065	Increase
201	ENSMUSG00000001436	10	76868075	76896836	Slc19a1	Slc19a1	solute carrier family 19 (folate transporter), member 1 [Source:MGI Symbol;Acc:MGI:103182]	28761	0.0499916	0.263359	0.793119	0.986922	Increase	nonDE	-0.175585	-0.908449	0.367043	0.916342	Decrease	nonDE	-0.159831	-0.82941	0.409949	0.803417	Decrease	nonDE	0.0342377	0.17317	0.863063	0.96471	Increase	nonDE	0.074095	0.452817	0.652209	0.999557	Increase	nonDE	-0.012698	-0.0720673	0.942773	0.999888	Decrease	nonDE	0.358261	1.91463	0.0600029	0.279959	Increase
202	ENSMUSG00000001440	11	97050540	97078707	Kpnb1	Kpnb1	karyopherin (importin) beta 1 [Source:MGI Symbol;Acc:MGI:107532]	28167	0.452765	3.13501	0.00259274	0.914925	Increase	nonDE	-0.311725	-2.05987	0.0434753	0.857116	Decrease	nonDE	0.124853	0.860241	0.392861	0.795352	Increase	nonDE	0.0161859	0.105632	0.916204	0.977288	Increase	nonDE	0.118296	0.903804	0.369482	0.999557	Increase	nonDE	0.0504827	0.360568	0.719608	0.992561	Increase	nonDE	0.329936	2.26208	0.02709	0.19824	Increase
203	ENSMUSG00000001441	11	97096668	97171464	Npepps	Npepps	aminopeptidase puromycin sensitive [Source:MGI Symbol;Acc:MGI:1101358]	74796	0.0191626	0.193527	0.847158	0.991164	Increase	nonDE	0.0610507	0.589446	0.557634	0.944608	Increase	nonDE	0.0162624	0.157541	0.875313	0.969484	Increase	nonDE	0.0639508	0.589731	0.557443	0.86578	Increase	nonDE	0.101878	1.07902	0.284623	0.999557	Increase	nonDE	0.0359862	0.359028	0.720753	0.992561	Increase	nonDE	0.139423	1.37469	0.174012	0.451897	Increase
204	ENSMUSG00000001445	11	96932386	96940039	Mrpl10	Mrpl10	mitochondrial ribosomal protein L10 [Source:MGI Symbol;Acc:MGI:1333801]	7653	-0.488588	-2.22406	0.0296727	0.914925	Decrease	nonDE	0.102381	0.467527	0.641708	0.959124	Increase	nonDE	-0.228041	-0.954534	0.343398	0.777088	Decrease	nonDE	-0.158167	-0.658725	0.512431	0.849291	Decrease	nonDE	-0.2393	-1.09245	0.278722	0.999557	Decrease	nonDE	0.226357	0.96976	0.33581	0.951231	Increase	nonDE	-0.328824	-1.37356	0.174363	0.452251	Decrease
205	ENSMUSG00000001467	5	4131145	4154746	Cyp51	Cyp51	cytochrome P450, family 51 [Source:MGI Symbol;Acc:MGI:106040]	23601	-0.0490537	-0.348074	0.728925	0.986466	Decrease	nonDE	0.0114122	0.0779472	0.938113	0.994617	Increase	nonDE	-0.16112	-1.10126	0.274902	0.738524	Decrease	nonDE	0.123478	0.808198	0.421965	0.810456	Increase	nonDE	-0.0673568	-0.504429	0.615689	0.999557	Decrease	nonDE	-0.157657	-1.14237	0.257548	0.928373	Decrease	nonDE	-0.0688553	-0.475141	0.636301	0.82663	Decrease
206	ENSMUSG00000001472	8	124100492	124130574	Tcf25	Tcf25	transcription factor 25 (basic helix-loop-helix) [Source:MGI Symbol;Acc:MGI:1914105]	30082	0.0144231	0.146821	0.883734	0.994086	Increase	nonDE	-0.181736	-1.8039	0.0759447	0.857116	Decrease	nonDE	0.1602	1.5441	0.127486	0.6432	Increase	nonDE	-0.327513	-3.06206	0.00321064	0.659766	Decrease	nonDE	0.0318841	0.347993	0.728985	0.999557	Increase	nonDE	-0.00697465	-0.0723547	0.942545	0.999888	Decrease	nonDE	0.241543	2.42566	0.0181056	0.169248	Increase
207	ENSMUSG00000001482	8	124150266	124190009	Def8	Def8	differentially expressed in FDCP 8 [Source:MGI Symbol;Acc:MGI:1346331]	39743	-0.231578	-1.09254	0.278684	0.920945	Decrease	nonDE	0.0793195	0.361617	0.718827	0.970035	Increase	nonDE	0.285321	1.18212	0.241524	0.715404	Increase	nonDE	-0.437579	-1.75275	0.084425	0.662099	Decrease	nonDE	-0.0244185	-0.124307	0.901461	0.999557	Decrease	nonDE	-0.306143	-1.52506	0.13216	0.873569	Decrease	nonDE	0.173745	0.792258	0.431132	0.69327	Increase
208	ENSMUSG00000001493	11	101768336	101785200	Meox1	Meox1	mesenchyme homeobox 1 [Source:MGI Symbol;Acc:MGI:103220]	16864	-0.455463	-0.814507	0.418369	0.952553	Decrease	nonDE	1.02804	1.75159	0.0846263	0.857116	Increase	nonDE	-0.306116	-0.525891	0.600778	0.88176	Decrease	nonDE	0.878697	1.43224	0.156931	0.690234	Increase	nonDE	0.0624356	0.11375	0.909792	0.999557	Increase	nonDE	-0.167126	-0.294404	0.769401	0.992561	Decrease	nonDE	0.126007	0.219086	0.827279	0.928225	Increase
209	ENSMUSG00000001494	11	101853284	101857841	Sost	Sost	sclerostin [Source:MGI Symbol;Acc:MGI:1921749]	4557	-0.123597	-0.227879	0.820465	0.989901	Decrease	nonDE	-0.246969	-0.445538	0.657432	0.961104	Decrease	nonDE	-0.31407	-0.562918	0.575454	0.870887	Decrease	nonDE	-0.0564963	-0.0984023	0.92192	0.979681	Decrease	nonDE	-0.000256156	-0.000490573	0.99961	0.999983	Decrease	nonDE	0.150926	0.275875	0.783531	0.992561	Increase	nonDE	-0.0964831	-0.177452	0.859713	0.943383	Decrease
210	ENSMUSG00000001504	13	72776939	72782317	Irx2	Irx2	Iroquois homeobox 2 [Source:MGI Symbol;Acc:MGI:1197526]	5378	0.0848171	0.209271	0.8349	0.990197	Increase	nonDE	-0.515437	-1.30643	0.196073	0.882382	Decrease	nonDE	-0.730405	-1.98847	0.051031	0.554772	Decrease	nonDE	0.299785	0.835269	0.406668	0.804902	Increase	nonDE	0.011755	0.0338549	0.973098	0.999557	Increase	nonDE	-0.0474114	-0.130076	0.896913	0.997348	Decrease	nonDE	0.334917	0.814979	0.418101	0.683022	Increase
211	ENSMUSG00000001506	11	94827050	94843868	Col1a1	Col1a1	collagen, type I, alpha 1 [Source:MGI Symbol;Acc:MGI:88467]	16818	0.370026	1.23292	0.222106	0.915093	Increase	nonDE	-0.0811797	-0.249553	0.803731	0.981192	Decrease	nonDE	0.293003	0.932207	0.354726	0.780613	Increase	nonDE	-0.0041564	-0.0121903	0.990312	0.998506	Decrease	nonDE	0.00156379	0.00540416	0.995705	0.999557	Increase	nonDE	-0.102577	-0.336746	0.737408	0.992561	Decrease	nonDE	-0.369515	-1.25955	0.212398	0.494595	Decrease
212	ENSMUSG00000001507	11	94935300	94967627	Itga3	Itga3	integrin alpha 3 [Source:MGI Symbol;Acc:MGI:96602]	32327	0.0135601	0.0813871	0.935388	0.995173	Increase	nonDE	-0.120153	-0.700398	0.486212	0.932808	Decrease	nonDE	0.106759	0.601663	0.54952	0.863466	Increase	nonDE	-0.213352	-1.16277	0.249233	0.72931	Decrease	nonDE	-0.0597176	-0.386491	0.700413	0.999557	Decrease	nonDE	-0.214217	-1.34775	0.182481	0.899859	Decrease	nonDE	-0.0276398	-0.165539	0.869041	0.94678	Decrease
213	ENSMUSG00000001508	11	94853617	94867153	Sgca	Sgca	sarcoglycan, alpha (dystrophin-associated glycoprotein) [Source:MGI Symbol;Acc:MGI:894698]	13536	-1.15572	-1.90309	0.0615201	0.914925	Decrease	nonDE	0.841687	1.34784	0.182451	0.878309	Increase	nonDE	-1.43021	-2.30527	0.0243979	0.502368	Decrease	nonDE	1.11618	1.73758	0.0870859	0.662143	Increase	nonDE	-0.0961207	-0.15659	0.87606	0.999557	Decrease	nonDE	-0.236671	-0.376027	0.708138	0.992561	Decrease	nonDE	-0.610369	-0.97032	0.335533	0.61642	Decrease
214	ENSMUSG00000001517	6	128339930	128353109	Foxm1	Foxm1	forkhead box M1 [Source:MGI Symbol;Acc:MGI:1347487]	13179	-0.543728	-1.09875	0.275987	0.920945	Decrease	nonDE	-0.404054	-0.806936	0.422687	0.924801	Decrease	nonDE	-0.488526	-0.956701	0.342312	0.776791	Decrease	nonDE	-0.459256	-0.882313	0.380903	0.795685	Decrease	nonDE	-1.42487	-2.9623	0.00427943	0.999557	Decrease	nonDE	0.263951	0.544741	0.587821	0.983222	Increase	nonDE	-1.00749	-1.98902	0.0509697	0.258774	Decrease
215	ENSMUSG00000001518	6	128386407	128401894	Itfg2	Itfg2	integrin alpha FG-GAP repeat containing 2 [Source:MGI Symbol;Acc:MGI:1915450]	15487	-0.212216	-1.02197	0.310638	0.925905	Decrease	nonDE	0.547106	2.33815	0.0225109	0.857116	Increase	nonDE	-0.241585	-1.10764	0.272154	0.737045	Decrease	nonDE	0.576475	2.35229	0.0217399	0.659766	Increase	nonDE	-0.437921	-2.14931	0.0353898	0.999557	Decrease	nonDE	-0.0831013	-0.409213	0.683747	0.991008	Decrease	nonDE	-0.700349	-3.29531	0.00160425	0.0671866	Decrease
216	ENSMUSG00000001520	6	128376259	128393390	Nrip2	Nrip2	nuclear receptor interacting protein 2 [Source:MGI Symbol;Acc:MGI:1891884]	17131	-0.216451	-0.644278	0.521693	0.962951	Decrease	nonDE	0.161189	0.462859	0.645033	0.959505	Increase	nonDE	-0.709098	-2.17525	0.0333049	0.526423	Decrease	nonDE	0.653836	1.91471	0.0599929	0.659766	Increase	nonDE	0.263221	0.953984	0.343675	0.999557	Increase	nonDE	-0.274535	-0.94452	0.348449	0.953432	Decrease	nonDE	0.236286	0.759666	0.450238	0.70545	Increase
217	ENSMUSG00000001521	6	128298124	128332814	Tulp3	Tulp3	tubby-like protein 3 [Source:MGI Symbol;Acc:MGI:1329045]	34690	0.0302203	0.113396	0.910071	0.994099	Increase	nonDE	0.389679	1.29947	0.198434	0.883214	Increase	nonDE	-0.333728	-1.26233	0.211402	0.695282	Decrease	nonDE	0.753628	2.51024	0.0145988	0.659766	Increase	nonDE	0.188315	0.778695	0.439024	0.999557	Increase	nonDE	-0.0447562	-0.169637	0.86583	0.995883	Decrease	nonDE	-0.26641	-1.07154	0.287945	0.570918	Decrease
218	ENSMUSG00000001524	17	35978622	35984631	Gtf2h4	Gtf2h4	general transcription factor II H, polypeptide 4 [Source:MGI Symbol;Acc:MGI:1338799]	6009	-0.0578086	-0.161366	0.872312	0.992959	Decrease	nonDE	-0.137816	-0.375054	0.708858	0.968549	Decrease	nonDE	-0.683126	-2.01667	0.0479216	0.551688	Decrease	nonDE	0.487502	1.38687	0.170283	0.694037	Increase	nonDE	0.159115	0.450929	0.653562	0.999557	Increase	nonDE	-0.0996018	-0.265323	0.791612	0.99277	Decrease	nonDE	-0.338841	-0.917331	0.362407	0.639748	Decrease
219	ENSMUSG00000001525	17	36144813	36149198	Tubb5	Tubb5	tubulin, beta 5 class I [Source:MGI Symbol;Acc:MGI:107812]	4385	0.0449594	0.474348	0.636863	0.975135	Increase	nonDE	-0.0869936	-0.885648	0.379117	0.916342	Decrease	nonDE	-0.116124	-1.19115	0.237986	0.714021	Decrease	nonDE	0.0740902	0.728928	0.4687	0.831242	Increase	nonDE	-0.0493944	-0.551741	0.583044	0.999557	Decrease	nonDE	-0.230075	-2.50322	0.0148645	0.721732	Decrease	nonDE	-0.0139226	-0.145053	0.885124	0.95397	Decrease
220	ENSMUSG00000001542	13	75854876	75920483	Ell2	Ell2	elongation factor for RNA polymerase II 2 [Source:MGI Symbol;Acc:MGI:2183438]	65607	-0.121416	-0.737468	0.463528	0.958877	Decrease	nonDE	0.0502242	0.294602	0.76925	0.976695	Increase	nonDE	-0.303817	-1.80725	0.075414	0.588198	Decrease	nonDE	0.232625	1.32755	0.189034	0.702639	Increase	nonDE	0.176212	1.20782	0.231551	0.999557	Increase	nonDE	-0.108943	-0.693826	0.490297	0.97719	Decrease	nonDE	0.243939	1.47856	0.144154	0.41527	Increase
221	ENSMUSG00000001552	11	100259784	100288589	Jup	Jup	junction plakoglobin [Source:MGI Symbol;Acc:MGI:96650]	28805	-0.248979	-1.15221	0.253513	0.919545	Decrease	nonDE	0.262482	1.16178	0.249632	0.896322	Increase	nonDE	-0.242143	-1.07143	0.287993	0.746875	Decrease	nonDE	0.255646	1.07751	0.28529	0.750239	Increase	nonDE	0.277386	1.35307	0.180785	0.999557	Increase	nonDE	0.00310875	0.0140273	0.988852	0.999888	Increase	nonDE	-0.158665	-0.744932	0.459035	0.711667	Decrease
222	ENSMUSG00000001555	11	100306523	100315650	Fkbp10	Fkbp10	FK506 binding protein 10 [Source:MGI Symbol;Acc:MGI:104769]	9127	0.061984	0.163951	0.870285	0.992959	Increase	nonDE	0.486573	1.16881	0.246808	0.895825	Increase	nonDE	0.131848	0.3306	0.742025	0.934156	Increase	nonDE	0.41671	0.95047	0.345442	0.773115	Increase	nonDE	0.300135	0.848499	0.399317	0.999557	Increase	nonDE	-0.390575	-1.05291	0.296333	0.943286	Decrease	nonDE	-0.037209	-0.101674	0.919332	0.967849	Decrease
223	ENSMUSG00000001569	5	29639662	29662841	Nom1	Nom1	nucleolar protein with MIF4G domain 1 [Source:MGI Symbol;Acc:MGI:1861749]	23179	-0.157323	-0.922508	0.359722	0.943914	Decrease	nonDE	0.309107	1.69908	0.0941522	0.857116	Increase	nonDE	0.193062	1.03534	0.304399	0.756926	Increase	nonDE	-0.0412787	-0.208076	0.835829	0.957248	Decrease	nonDE	-0.0482179	-0.297977	0.766684	0.999557	Decrease	nonDE	-0.165298	-0.983798	0.328913	0.950337	Decrease	nonDE	-0.294594	-1.74376	0.0859935	0.326911	Decrease
224	ENSMUSG00000001576	17	26780463	26875908	Ergic1	Ergic1	endoplasmic reticulum-golgi intermediate compartment (ERGIC) 1 [Source:MGI Symbol;Acc:MGI:1914708]	95445	-0.0366936	-0.274402	0.784658	0.986922	Decrease	nonDE	-0.0322944	-0.232912	0.816572	0.983237	Decrease	nonDE	0.106088	0.751425	0.455146	0.823477	Increase	nonDE	-0.175076	-1.19105	0.238023	0.724347	Decrease	nonDE	-0.13504	-1.07759	0.285256	0.999557	Decrease	nonDE	-0.0393744	-0.302692	0.763104	0.992561	Decrease	nonDE	-0.0559635	-0.415878	0.678888	0.852809	Decrease
225	ENSMUSG00000001583	11	69741831	69749556	Tnk1	Tnk1	tyrosine kinase, non-receptor, 1 [Source:MGI Symbol;Acc:MGI:1930958]	7725	-0.795627	-1.38486	0.170896	0.914925	Decrease	nonDE	0.98693	1.65229	0.103365	0.859258	Increase	nonDE	-0.861442	-1.4544	0.150713	0.663695	Decrease	nonDE	1.05274	1.69992	0.0939927	0.664169	Increase	nonDE	0.0793696	0.134636	0.893321	0.999557	Increase	nonDE	-0.570595	-0.947521	0.346931	0.953432	Decrease	nonDE	-0.895007	-1.49988	0.138554	0.40785	Decrease
226	ENSMUSG00000001604	4	135975040	136002209	Tcea3	Tcea3	transcription elongation factor A (SII), 3 [Source:MGI Symbol;Acc:MGI:1196908]	27169	0.562322	1.06813	0.289468	0.924234	Increase	nonDE	-0.46499	-0.8521	0.39733	0.917766	Decrease	nonDE	0.183511	0.340937	0.734266	0.930899	Increase	nonDE	-0.0861796	-0.153469	0.87851	0.966518	Decrease	nonDE	0.523888	0.996895	0.322563	0.999557	Increase	nonDE	-0.978031	-1.82656	0.0724209	0.830809	Decrease	nonDE	-0.0974649	-0.181523	0.85653	0.942388	Decrease
227	ENSMUSG00000001622	5	88073438	88080524	Csn3	Csn3	casein kappa [Source:MGI Symbol;Acc:MGI:107461]	7086	-0.257564	-0.450578	0.653814	0.975948	Decrease	nonDE	0.425196	0.716746	0.476133	0.930733	Increase	nonDE	-0.741019	-1.27233	0.20785	0.693907	Decrease	nonDE	0.908651	1.49335	0.140249	0.682613	Increase	nonDE	-0.310752	-0.533755	0.595357	0.999557	Decrease	nonDE	-0.0891095	-0.149085	0.881955	0.995883	Decrease	nonDE	-1.58927	-2.72049	0.00838062	0.124933	Decrease
228	ENSMUSG00000001627	12	40251566	40298503	Ifrd1	Ifrd1	interferon-related developmental regulator 1 [Source:MGI Symbol;Acc:MGI:1316717]	46937	0.0484286	0.283096	0.778015	0.986803	Increase	nonDE	0.00503724	0.0280524	0.977707	0.998082	Increase	nonDE	0.101233	0.559963	0.577456	0.872461	Increase	nonDE	-0.0477672	-0.251023	0.802599	0.949632	Decrease	nonDE	0.0686657	0.443811	0.658673	0.999557	Increase	nonDE	0.025749	0.1566	0.876052	0.995883	Increase	nonDE	0.10607	0.637817	0.525864	0.757714	Increase
229	ENSMUSG00000001630	6	146626493	146680310	Stk38l	Stk38l	serine/threonine kinase 38 like [Source:MGI Symbol;Acc:MGI:1922250]	53817	0.247453	1.31169	0.194302	0.914925	Increase	nonDE	-0.227151	-1.15014	0.254356	0.896322	Decrease	nonDE	0.25188	1.24805	0.216552	0.698541	Increase	nonDE	-0.231578	-1.094	0.278049	0.748171	Decrease	nonDE	0.359025	2.13818	0.0363188	0.999557	Increase	nonDE	-0.189125	-1.02934	0.307189	0.947522	Decrease	nonDE	0.041439	0.234648	0.81523	0.92302	Increase
230	ENSMUSG00000001632	6	113284098	113301821	Brpf1	Brpf1	bromodomain and PHD finger containing, 1 [Source:MGI Symbol;Acc:MGI:1926033]	17723	0.172133	1.15594	0.251993	0.919545	Increase	nonDE	-0.0378756	-0.241414	0.810005	0.98238	Decrease	nonDE	0.0667371	0.43568	0.664532	0.907002	Increase	nonDE	0.0675207	0.416276	0.678598	0.912221	Increase	nonDE	-0.0528144	-0.401622	0.689298	0.999557	Decrease	nonDE	0.282956	1.99286	0.0505358	0.795049	Increase	nonDE	0.152938	1.05343	0.296098	0.58014	Increase
231	ENSMUSG00000001642	6	34279369	34294413	Akr1b3	Akr1b3	aldo-keto reductase family 1, member B3 (aldose reductase) [Source:MGI Symbol;Acc:MGI:1353494]	15044	-0.50082	-0.927545	0.357122	0.943336	Decrease	nonDE	-0.614267	-1.14145	0.257929	0.896482	Decrease	nonDE	-1.10154	-2.0114	0.0484905	0.551971	Decrease	nonDE	-0.0135457	-0.0246077	0.980444	0.997068	Decrease	nonDE	0.591552	1.14075	0.258216	0.999557	Increase	nonDE	-0.28788	-0.529381	0.598369	0.984457	Decrease	nonDE	0.25436	0.474896	0.636475	0.826675	Increase
232	ENSMUSG00000001655	15	102829538	102837249	Hoxc13	Hoxc13	homeobox C13 [Source:MGI Symbol;Acc:MGI:99560]	7711	-0.780782	-1.37046	0.175322	0.914925	Decrease	nonDE	0.711335	1.20941	0.230946	0.89017	Increase	nonDE	-0.605459	-1.02403	0.30967	0.759684	Decrease	nonDE	0.536012	0.873174	0.385827	0.797259	Increase	nonDE	-0.522719	-0.91741	0.362366	0.999557	Decrease	nonDE	0.501756	0.852068	0.397348	0.962487	Increase	nonDE	-0.909035	-1.55299	0.125349	0.389601	Decrease
233	ENSMUSG00000001657	15	102899039	102902543	Hoxc8	Hoxc8	homeobox C8 [Source:MGI Symbol;Acc:MGI:96198]	3504	-0.377725	-0.587706	0.559006	0.969571	Decrease	nonDE	1.57557	2.29775	0.0251943	0.857116	Increase	nonDE	-0.818853	-1.25916	0.213008	0.696228	Decrease	nonDE	2.01669	2.88817	0.00543516	0.659766	Increase	nonDE	-0.0225693	-0.033459	0.973423	0.999557	Decrease	nonDE	-0.187425	-0.269916	0.788181	0.992561	Decrease	nonDE	-0.973689	-1.42533	0.15941	0.435239	Decrease
234	ENSMUSG00000001663	10	75619647	75634418	Gstt1	Gstt1	glutathione S-transferase, theta 1 [Source:MGI Symbol;Acc:MGI:107379]	14771	-0.322924	-1.58502	0.117881	0.914925	Decrease	nonDE	0.203004	0.958784	0.341269	0.912008	Increase	nonDE	-0.278639	-1.29999	0.198258	0.688533	Decrease	nonDE	0.158719	0.709589	0.480532	0.835304	Increase	nonDE	-0.314739	-1.82491	0.0726741	0.999557	Decrease	nonDE	0.0555987	0.312253	0.755861	0.992561	Increase	nonDE	-0.275621	-1.47153	0.146038	0.418314	Decrease
235	ENSMUSG00000001665	10	75609949	75617248	Gstt3	Gstt3	glutathione S-transferase, theta 3 [Source:MGI Symbol;Acc:MGI:2143526]	7299	-0.044133	-0.14725	0.883397	0.994082	Decrease	nonDE	-0.227038	-0.757887	0.451295	0.930047	Decrease	nonDE	0.0475103	0.148526	0.882394	0.970602	Increase	nonDE	-0.318682	-0.988919	0.32642	0.765716	Decrease	nonDE	0.0826172	0.334149	0.739358	0.999557	Increase	nonDE	-0.238874	-0.916878	0.362642	0.956949	Decrease	nonDE	0.230902	0.827994	0.410745	0.67743	Increase
236	ENSMUSG00000001666	10	75607064	75609248	Ddt	Ddt	D-dopachrome tautomerase [Source:MGI Symbol;Acc:MGI:1298381]	2184	-0.0622599	-0.508653	0.612741	0.974472	Decrease	nonDE	-0.0369015	-0.291149	0.771877	0.976804	Decrease	nonDE	-0.0636718	-0.496076	0.621537	0.889695	Decrease	nonDE	-0.0354896	-0.265776	0.791264	0.946494	Decrease	nonDE	-0.0724006	-0.638823	0.525214	0.999557	Decrease	nonDE	-0.0668765	-0.566108	0.573297	0.983222	Decrease	nonDE	0.165698	1.32374	0.190288	0.470971	Increase
237	ENSMUSG00000001672	8	110674546	110688835	Marveld3	Marveld3	MARVEL (membrane-associating) domain containing 3 [Source:MGI Symbol;Acc:MGI:1920858]	14289	-0.839671	-1.46684	0.147307	0.914925	Decrease	nonDE	0.325644	0.566664	0.572921	0.949912	Increase	nonDE	-0.97939	-1.66631	0.10053	0.617876	Decrease	nonDE	0.465363	0.782418	0.436849	0.817836	Increase	nonDE	-0.204267	-0.324255	0.746801	0.999557	Decrease	nonDE	-0.155681	-0.241711	0.809775	0.994411	Decrease	nonDE	-1.39493	-2.26476	0.0269155	0.19754	Decrease
238	ENSMUSG00000001674	1	121481564	121495718	Ddx18	Ddx18	DEAD box helicase 18 [Source:MGI Symbol;Acc:MGI:1914192]	14154	-0.478966	-1.21563	0.228582	0.919218	Decrease	nonDE	0.015594	0.040531	0.967796	0.997115	Increase	nonDE	-0.298814	-0.71478	0.47734	0.83383	Decrease	nonDE	-0.164559	-0.398782	0.691379	0.914449	Decrease	nonDE	0.191611	0.556609	0.579732	0.999557	Increase	nonDE	-0.285308	-0.792973	0.430718	0.970919	Decrease	nonDE	0.149342	0.398215	0.691794	0.859961	Increase
239	ENSMUSG00000001687	5	148441445	148489599	Ubl3	Ubl3	ubiquitin-like 3 [Source:MGI Symbol;Acc:MGI:1344373]	48154	-0.0131772	-0.0891551	0.929237	0.994788	Decrease	nonDE	0.0761823	0.493415	0.623405	0.959124	Increase	nonDE	-0.155527	-1.02209	0.31058	0.760464	Decrease	nonDE	0.218532	1.36727	0.176316	0.696674	Increase	nonDE	0.1422	1.00748	0.317492	0.999557	Increase	nonDE	0.0027157	0.0181493	0.985576	0.999888	Increase	nonDE	-0.0629247	-0.423666	0.673227	0.848915	Decrease
240	ENSMUSG00000001700	18	56533409	56636864	Gramd3	Gramd3	GRAM domain containing 3 [Source:MGI Symbol;Acc:MGI:1914815]	103455	-0.290206	-1.57917	0.119218	0.914925	Decrease	nonDE	0.166691	0.876495	0.384033	0.916342	Increase	nonDE	-0.214845	-1.10806	0.271976	0.73692	Decrease	nonDE	0.0913297	0.45318	0.651949	0.90185	Increase	nonDE	0.0979834	0.604657	0.547541	0.999557	Increase	nonDE	-0.0948258	-0.552001	0.582867	0.983222	Decrease	nonDE	0.0378234	0.216331	0.829416	0.929385	Increase
241	ENSMUSG00000001707	13	38828183	38843034	Eef1e1	Eef1e1	eukaryotic translation elongation factor 1 epsilon 1 [Source:MGI Symbol;Acc:MGI:1913393]	14851	0.117993	0.688786	0.493443	0.960724	Increase	nonDE	-0.071284	-0.395763	0.693594	0.966626	Decrease	nonDE	-0.0497395	-0.28245	0.778508	0.94637	Decrease	nonDE	0.0964489	0.518188	0.60611	0.883628	Increase	nonDE	0.0382272	0.244918	0.807302	0.999557	Increase	nonDE	-0.0830204	-0.502708	0.616892	0.986935	Decrease	nonDE	-0.324931	-2.00431	0.0492646	0.25547	Decrease
242	ENSMUSG00000001729	12	112620255	112641318	Akt1	Akt1	thymoma viral proto-oncogene 1 [Source:MGI Symbol;Acc:MGI:87986]	21063	-0.0492233	-0.313506	0.754914	0.986466	Decrease	nonDE	0.125119	0.757448	0.451556	0.930047	Increase	nonDE	-0.161679	-0.997052	0.322487	0.766934	Decrease	nonDE	0.237575	1.38598	0.170554	0.694179	Increase	nonDE	0.0238692	0.158886	0.874258	0.999557	Increase	nonDE	-0.144106	-0.922159	0.359903	0.956581	Decrease	nonDE	-0.262056	-1.65923	0.101953	0.353878	Decrease
243	ENSMUSG00000001741	7	83292033	83394934	Il16	Il16	interleukin 16 [Source:MGI Symbol;Acc:MGI:1270855]	102901	0.189907	1.13241	0.261679	0.919545	Increase	nonDE	-0.0252773	-0.142219	0.887353	0.987405	Decrease	nonDE	0.348954	1.94059	0.0567074	0.564776	Increase	nonDE	-0.184325	-0.966974	0.33719	0.770017	Decrease	nonDE	0.00094649	0.00647891	0.994851	0.999557	Increase	nonDE	0.36267	2.25804	0.0273546	0.758064	Increase	nonDE	0.389116	2.35305	0.0216993	0.181903	Increase
244	ENSMUSG00000001750	19	3946050	3957133	Tcirg1	Tcirg1	T cell, immune regulator 1, ATPase, H+ transporting, lysosomal V0 protein A3 [Source:MGI Symbol;Acc:MGI:1350931]	11083	-0.772741	-1.76846	0.081741	0.914925	Decrease	nonDE	0.726552	1.59157	0.116401	0.866234	Increase	nonDE	-0.785237	-1.7443	0.0858988	0.599307	Decrease	nonDE	0.739048	1.56298	0.12298	0.674283	Increase	nonDE	-0.172913	-0.422446	0.674113	0.999557	Decrease	nonDE	0.221891	0.508315	0.612977	0.986248	Increase	nonDE	0.444369	0.955807	0.342759	0.621957	Increase
245	ENSMUSG00000001751	11	100960838	100968498	Naglu	Naglu	alpha-N-acetylglucosaminidase (Sanfilippo disease IIIB) [Source:MGI Symbol;Acc:MGI:1351641]	7660	0.201444	0.582156	0.562503	0.97037	Increase	nonDE	-0.248037	-0.68595	0.495218	0.934303	Decrease	nonDE	0.501267	1.30113	0.197869	0.688266	Increase	nonDE	-0.54786	-1.36229	0.177874	0.697053	Decrease	nonDE	0.148103	0.446669	0.656619	0.999557	Increase	nonDE	-0.364799	-1.06766	0.289675	0.943286	Decrease	nonDE	-0.0840819	-0.242933	0.808833	0.920725	Decrease
246	ENSMUSG00000001755	11	100973391	100977445	Coasy	Coasy	Coenzyme A synthase [Source:MGI Symbol;Acc:MGI:1918993]	4054	0.097969	0.476574	0.635286	0.975135	Increase	nonDE	0.0713606	0.324633	0.746516	0.97537	Increase	nonDE	0.475496	2.03251	0.0462484	0.54819	Increase	nonDE	-0.306166	-1.23312	0.222033	0.718078	Decrease	nonDE	-0.11936	-0.634355	0.528106	0.999557	Decrease	nonDE	0.0443032	0.223997	0.823472	0.995216	Increase	nonDE	0.457099	2.03075	0.0464319	0.249582	Increase
247	ENSMUSG00000001761	6	29735502	29761364	Smo	Smo	smoothened, frizzled class receptor [Source:MGI Symbol;Acc:MGI:108075]	25862	0.0307917	0.0649437	0.948421	0.995429	Increase	nonDE	-0.23748	-0.487528	0.627547	0.959124	Decrease	nonDE	-0.160861	-0.332521	0.74058	0.933279	Decrease	nonDE	-0.0458277	-0.0915632	0.927331	0.981832	Decrease	nonDE	-0.674781	-1.56804	0.121795	0.999557	Decrease	nonDE	1.22153	2.62556	0.0108047	0.721732	Increase	nonDE	-0.375383	-0.798109	0.427754	0.689874	Decrease
248	ENSMUSG00000001763	6	29694221	29718558	Tspan33	Tspan33	tetraspanin 33 [Source:MGI Symbol;Acc:MGI:1919012]	24337	0.152309	0.535951	0.593847	0.973503	Increase	nonDE	-0.260681	-0.908393	0.367072	0.916342	Decrease	nonDE	0.128293	0.426722	0.671011	0.910414	Increase	nonDE	-0.236665	-0.774282	0.44161	0.819868	Decrease	nonDE	-0.00170001	-0.00705312	0.994394	0.999557	Decrease	nonDE	0.109226	0.414409	0.679958	0.990911	Increase	nonDE	0.341276	1.19323	0.237178	0.521768	Increase
249	ENSMUSG00000001767	2	145759399	145776934	Crnkl1	Crnkl1	crooked neck pre-mRNA splicing factor 1 [Source:MGI Symbol;Acc:MGI:1914127]	17535	-0.0300296	-0.185941	0.853078	0.992066	Decrease	nonDE	0.0585636	0.346543	0.730069	0.971614	Increase	nonDE	-0.0820831	-0.488776	0.626668	0.891421	Decrease	nonDE	0.110617	0.626667	0.533102	0.857129	Increase	nonDE	-0.00362318	-0.024149	0.980809	0.999557	Decrease	nonDE	-0.102972	-0.656926	0.51358	0.979776	Decrease	nonDE	-0.124357	-0.767921	0.445353	0.702086	Decrease
250	ENSMUSG00000001768	2	145517135	145729536	Rin2	Rin2	Ras and Rab interactor 2 [Source:MGI Symbol;Acc:MGI:1921280]	212401	0.0667651	0.335276	0.738512	0.986466	Increase	nonDE	-0.455886	-2.29793	0.024838	0.857116	Decrease	nonDE	-0.221512	-1.09445	0.277854	0.739668	Decrease	nonDE	-0.167609	-0.824281	0.412836	0.805831	Decrease	nonDE	0.247055	1.3649	0.177056	0.999557	Increase	nonDE	-0.456623	-2.45051	0.0170041	0.722317	Decrease	nonDE	-0.00977182	-0.0503585	0.959993	0.984457	Decrease
251	ENSMUSG00000001773	7	86368185	86425151	Folh1	Folh1	folate hydrolase 1 [Source:MGI Symbol;Acc:MGI:1858193]	56966	-0.450533	-1.27117	0.20826	0.914925	Decrease	nonDE	-0.00321033	-0.00935246	0.992567	0.999299	Decrease	nonDE	-0.626613	-1.75571	0.0839145	0.597436	Decrease	nonDE	0.172869	0.49556	0.621899	0.890401	Increase	nonDE	0.431745	1.51264	0.135284	0.999557	Increase	nonDE	0.15364	0.457419	0.648916	0.98961	Increase	nonDE	0.580253	1.78989	0.0781937	0.313026	Increase
252	ENSMUSG00000001774	9	18203421	18228738	Chordc1	Chordc1	cysteine and histidine-rich domain (CHORD)-containing, zinc-binding protein 1 [Source:MGI Symbol;Acc:MGI:1914167]	25317	-0.142583	-1.33046	0.18808	0.914925	Decrease	nonDE	-0.0890892	-0.813358	0.419023	0.924801	Decrease	nonDE	-0.0230803	-0.203978	0.839017	0.9603	Decrease	nonDE	-0.208592	-1.79361	0.0775912	0.660017	Decrease	nonDE	0.0812247	0.79338	0.430483	0.999557	Increase	nonDE	-0.192389	-1.80475	0.0758096	0.830809	Decrease	nonDE	0.0930515	0.845282	0.401097	0.670548	Increase
253	ENSMUSG00000001783	10	85774501	85793687	Rtcb	Rtcb	RNA 2',3'-cyclic phosphate and 5'-OH ligase [Source:MGI Symbol;Acc:MGI:106379]	19186	0.0524916	0.447448	0.65606	0.976758	Increase	nonDE	-0.178692	-1.47631	0.144756	0.866234	Decrease	nonDE	-0.0068143	-0.0558527	0.955633	0.99001	Decrease	nonDE	-0.119386	-0.94315	0.349145	0.774942	Decrease	nonDE	0.00770229	0.0708314	0.943752	0.999557	Increase	nonDE	-0.110291	-0.971191	0.335103	0.951231	Decrease	nonDE	-0.148035	-1.28765	0.202495	0.485216	Decrease
254	ENSMUSG00000001785	10	85665358	85724960	Pwp1	Pwp1	PWP1 homolog, endonuclein [Source:MGI Symbol;Acc:MGI:1914735]	59602	-0.194941	-1.10585	0.272925	0.920945	Decrease	nonDE	-0.119001	-0.672763	0.503515	0.935607	Decrease	nonDE	-0.0411142	-0.218052	0.828081	0.95757	Decrease	nonDE	-0.272828	-1.43144	0.157161	0.690234	Decrease	nonDE	-0.0629692	-0.403283	0.688082	0.999557	Decrease	nonDE	-0.113883	-0.698094	0.487642	0.97719	Decrease	nonDE	0.0147547	0.0846804	0.932779	0.973982	Increase
255	ENSMUSG00000001786	10	85857836	85887737	Fbxo7	Fbxo7	F-box protein 7 [Source:MGI Symbol;Acc:MGI:1917004]	29901	-0.163684	-0.981392	0.330088	0.93568	Decrease	nonDE	-0.0876581	-0.51773	0.606428	0.953858	Decrease	nonDE	-0.142503	-0.811765	0.41993	0.807513	Decrease	nonDE	-0.108838	-0.606831	0.546106	0.862191	Decrease	nonDE	-0.220671	-1.42183	0.159922	0.999557	Decrease	nonDE	-0.166647	-1.05684	0.294552	0.943286	Decrease	nonDE	-0.327672	-1.96129	0.0541903	0.266455	Decrease
256	ENSMUSG00000001794	7	29886361	29898236	Capns1	Capns1	calpain, small subunit 1 [Source:MGI Symbol;Acc:MGI:88266]	11875	0.20912	1.744	0.0859513	0.914925	Increase	nonDE	-0.271977	-2.19544	0.0317581	0.857116	Decrease	nonDE	0.0601033	0.485809	0.628759	0.891421	Increase	nonDE	-0.122961	-0.95626	0.342532	0.771877	Decrease	nonDE	-0.0541975	-0.486097	0.628556	0.999557	Decrease	nonDE	-0.108773	-0.941015	0.350229	0.953432	Decrease	nonDE	0.251138	2.03619	0.0458668	0.248504	Increase
257	ENSMUSG00000001802	7	34899452	34914923	Lrp3	Lrp3	low density lipoprotein receptor-related protein 3 [Source:MGI Symbol;Acc:MGI:3584516]	15471	-0.0593276	-0.259749	0.79589	0.987449	Decrease	nonDE	-0.0846104	-0.360042	0.719999	0.970035	Decrease	nonDE	0.361839	1.38902	0.169633	0.677976	Increase	nonDE	-0.505777	-1.88576	0.0638591	0.659766	Decrease	nonDE	-0.219813	-0.997942	0.322059	0.999557	Decrease	nonDE	-0.214096	-0.970968	0.335213	0.951231	Decrease	nonDE	-0.0554383	-0.221887	0.825107	0.927441	Decrease
258	ENSMUSG00000001815	2	74483335	74489901	Evx2	Evx2	even-skipped homeobox 2 [Source:MGI Symbol;Acc:MGI:95462]	6566	-0.0662225	-0.118125	0.906338	0.994099	Decrease	nonDE	-0.3025	-0.529912	0.598003	0.951993	Decrease	nonDE	-1.36755	-2.55332	0.0130594	0.455927	Decrease	nonDE	0.998829	1.81252	0.0745874	0.659766	Increase	nonDE	0.405439	0.741058	0.461364	0.999557	Increase	nonDE	-0.286554	-0.50096	0.618115	0.987466	Decrease	nonDE	-0.356191	-0.644622	0.521472	0.754828	Decrease
259	ENSMUSG00000001827	7	101507538	101519995	Folr1	Folr1	folate receptor 1 (adult) [Source:MGI Symbol;Acc:MGI:95568]	12457	0.136508	0.322989	0.747754	0.986466	Increase	nonDE	-0.236901	-0.544188	0.5882	0.951194	Decrease	nonDE	0.542172	1.10284	0.27422	0.738083	Increase	nonDE	-0.642565	-1.26979	0.208748	0.710712	Decrease	nonDE	0.00962636	0.0236057	0.98124	0.999557	Increase	nonDE	-0.752	-1.91249	0.0602818	0.806348	Decrease	nonDE	-0.11075	-0.240609	0.810626	0.921138	Decrease
260	ENSMUSG00000001829	7	101312840	101444713	Clpb	Clpb	ClpB caseinolytic peptidase B [Source:MGI Symbol;Acc:MGI:1100517]	131873	-0.176669	-1.11946	0.267119	0.919545	Decrease	nonDE	0.0669918	0.409777	0.683335	0.964806	Increase	nonDE	-0.0806878	-0.476277	0.635496	0.893994	Decrease	nonDE	-0.0289896	-0.16468	0.869714	0.965896	Decrease	nonDE	-0.0113438	-0.0782924	0.937839	0.999557	Decrease	nonDE	-0.048745	-0.320148	0.749897	0.992561	Decrease	nonDE	0.186225	1.14596	0.25607	0.540768	Increase
261	ENSMUSG00000001833	9	25163735	25219867	Septin7	Septin7	septin 7 [Source:MGI Symbol;Acc:MGI:1335094]	56132	-0.141588	-1.35695	0.179556	0.914925	Decrease	nonDE	0.0072261	0.0671062	0.946706	0.995038	Increase	nonDE	-0.0781436	-0.714599	0.47745	0.833945	Decrease	nonDE	-0.0562179	-0.495638	0.621844	0.890401	Decrease	nonDE	-0.151561	-1.52218	0.132881	0.999557	Decrease	nonDE	-0.202446	-1.98813	0.0510706	0.795049	Decrease	nonDE	-0.288546	-2.75009	0.00773331	0.122656	Decrease
262	ENSMUSG00000001844	5	143302244	143315011	Zdhhc4	Zdhhc4	zinc finger, DHHC domain containing 4 [Source:MGI Symbol;Acc:MGI:1920131]	12767	0.163937	0.629491	0.531265	0.964584	Increase	nonDE	-0.349636	-1.32416	0.190152	0.882339	Decrease	nonDE	0.00583648	0.0223303	0.982254	0.997575	Increase	nonDE	-0.191535	-0.716929	0.476021	0.834388	Decrease	nonDE	0.187887	0.887574	0.378087	0.999557	Increase	nonDE	-0.189722	-0.847378	0.399936	0.96251	Decrease	nonDE	0.23737	1.00224	0.319993	0.601813	Increase
263	ENSMUSG00000001847	5	143489389	143513791	Rac1	Rac1	Rac family small GTPase 1 [Source:MGI Symbol;Acc:MGI:97845]	24402	0.111188	1.27604	0.206544	0.914925	Increase	nonDE	-0.00793605	-0.0869215	0.931005	0.993112	Decrease	nonDE	0.0200549	0.222175	0.824884	0.956928	Increase	nonDE	0.083197	0.875479	0.384581	0.796561	Increase	nonDE	0.0132466	0.163412	0.870708	0.999557	Increase	nonDE	-0.0254488	-0.299352	0.76564	0.992561	Decrease	nonDE	0.0615287	0.706169	0.482641	0.727405	Increase
264	ENSMUSG00000001855	2	31864448	31943987	Nup214	Nup214	nucleoporin 214 [Source:MGI Symbol;Acc:MGI:1095411]	79539	0.246121	1.13361	0.261178	0.919545	Increase	nonDE	-0.278842	-1.24338	0.218255	0.885683	Decrease	nonDE	0.281016	1.21222	0.229876	0.708818	Increase	nonDE	-0.313737	-1.30538	0.196429	0.705737	Decrease	nonDE	6.95321e-05	0.00037705	0.9997	0.999983	Increase	nonDE	0.126301	0.63446	0.528038	0.979776	Increase	nonDE	0.462199	2.17691	0.0331757	0.218283	Increase
265	ENSMUSG00000001864	2	31840151	31863454	Aif1l	Aif1l	allograft inflammatory factor 1-like [Source:MGI Symbol;Acc:MGI:1919598]	23303	-0.123412	-0.38196	0.703754	0.98483	Decrease	nonDE	-0.580909	-1.89104	0.0631378	0.857116	Decrease	nonDE	0.309235	0.852357	0.397188	0.797568	Increase	nonDE	-1.01356	-2.88476	0.00532904	0.659766	Decrease	nonDE	-0.0131975	-0.0513238	0.959227	0.999557	Decrease	nonDE	-0.0210806	-0.0757367	0.939864	0.999888	Decrease	nonDE	0.358524	1.17837	0.243005	0.527644	Increase
266	ENSMUSG00000001870	17	75312563	75699507	Ltbp1	Ltbp1	latent transforming growth factor beta binding protein 1 [Source:MGI Symbol;Acc:MGI:109151]	386944	0.342943	0.79111	0.431797	0.955301	Increase	nonDE	-0.0269974	-0.0582922	0.953697	0.995866	Decrease	nonDE	0.561191	1.23361	0.221849	0.7037	Increase	nonDE	-0.245245	-0.503687	0.616208	0.888499	Decrease	nonDE	-0.182424	-0.496583	0.621181	0.999557	Decrease	nonDE	0.280439	0.706793	0.482256	0.975723	Increase	nonDE	1.06069	2.39927	0.0193447	0.173602	Increase
267	ENSMUSG00000001891	11	21271138	21321201	Ugp2	Ugp2	UDP-glucose pyrophosphorylase 2 [Source:MGI Symbol;Acc:MGI:2183447]	50063	0.117109	0.927451	0.35717	0.943336	Increase	nonDE	-0.148679	-1.13591	0.260222	0.898505	Decrease	nonDE	-0.187506	-1.47294	0.14566	0.657747	Decrease	nonDE	0.155936	1.17287	0.245187	0.726847	Increase	nonDE	-0.0669826	-0.565215	0.5739	0.999557	Decrease	nonDE	-0.0339307	-0.273946	0.785007	0.992561	Decrease	nonDE	-0.0295448	-0.230827	0.818184	0.924408	Decrease
268	ENSMUSG00000001909	8	85412936	85426437	Trmt1	Trmt1	tRNA methyltransferase 1 [Source:MGI Symbol;Acc:MGI:1289155]	13501	0.0606984	0.27491	0.784269	0.986922	Increase	nonDE	-0.269737	-1.19876	0.235031	0.891387	Decrease	nonDE	-0.220471	-0.988367	0.326688	0.768585	Decrease	nonDE	0.0114323	0.0498987	0.960358	0.992426	Increase	nonDE	-0.226689	-1.07599	0.285964	0.999557	Decrease	nonDE	-0.0321324	-0.147259	0.883389	0.995883	Decrease	nonDE	-0.511688	-2.34828	0.0219563	0.182181	Decrease
269	ENSMUSG00000001910	8	85397108	85414531	Nacc1	Nacc1	nucleus accumbens associated 1, BEN and BTB (POZ) domain containing [Source:MGI Symbol;Acc:MGI:1914080]	17423	0.303888	1.48974	0.141195	0.914925	Increase	nonDE	-0.167694	-0.780073	0.438218	0.929096	Decrease	nonDE	0.366055	1.69281	0.0953459	0.609646	Increase	nonDE	-0.229861	-1.00666	0.317882	0.761443	Decrease	nonDE	0.0467804	0.271822	0.786632	0.999557	Increase	nonDE	0.317311	1.67318	0.0991636	0.849523	Increase	nonDE	0.699798	3.39218	0.00119225	0.0595139	Increase
270	ENSMUSG00000001911	8	85426505	85526973	Nfix	Nfix	nuclear factor I/X [Source:MGI Symbol;Acc:MGI:97311]	100468	0.165406	1.43779	0.155356	0.914925	Increase	nonDE	-0.0585239	-0.485839	0.628738	0.959124	Decrease	nonDE	0.312558	2.57128	0.012462	0.455927	Increase	nonDE	-0.205676	-1.61104	0.112083	0.671734	Decrease	nonDE	0.0523661	0.49973	0.618975	0.999557	Increase	nonDE	0.203312	1.80478	0.0758055	0.830809	Increase	nonDE	0.372307	3.23294	0.00193698	0.0719755	Increase
271	ENSMUSG00000001918	7	16515265	16532199	Slc1a5	Slc1a5	solute carrier family 1 (neutral amino acid transporter), member 5 [Source:MGI Symbol;Acc:MGI:105305]	16934	-0.534747	-0.945017	0.348198	0.941262	Decrease	nonDE	0.339647	0.58345	0.561637	0.945096	Increase	nonDE	-0.365368	-0.619408	0.537843	0.859357	Decrease	nonDE	0.170267	0.278996	0.781146	0.942619	Increase	nonDE	-0.176473	-0.305706	0.760819	0.999557	Decrease	nonDE	-0.150568	-0.254048	0.800272	0.994411	Decrease	nonDE	-0.389408	-0.652196	0.516606	0.752138	Decrease
272	ENSMUSG00000001924	X	20524565	20549418	Uba1	Uba1	ubiquitin-like modifier activating enzyme 1 [Source:MGI Symbol;Acc:MGI:98890]	24853	-0.0045943	-0.0443528	0.964761	0.995525	Decrease	nonDE	0.0594641	0.549901	0.584298	0.951194	Increase	nonDE	0.217272	1.97288	0.0528232	0.559476	Increase	nonDE	-0.162402	-1.40859	0.163787	0.69175	Decrease	nonDE	0.0991393	1.04433	0.300256	0.999557	Increase	nonDE	-0.0159489	-0.158972	0.874191	0.995883	Decrease	nonDE	0.333813	3.22427	0.00198801	0.0729035	Increase
273	ENSMUSG00000001930	6	125523737	125663642	Vwf	Vwf	Von Willebrand factor [Source:MGI Symbol;Acc:MGI:98941]	139905	0.401488	0.983043	0.329281	0.93534	Increase	nonDE	-0.037448	-0.0836175	0.933621	0.993388	Decrease	nonDE	0.290594	0.678703	0.499769	0.843116	Increase	nonDE	0.0734466	0.156483	0.876144	0.966425	Increase	nonDE	0.637479	1.42733	0.158337	0.999557	Increase	nonDE	-0.562363	-1.18136	0.241822	0.926783	Decrease	nonDE	0.204278	0.4591	0.647715	0.833763	Increase
274	ENSMUSG00000001942	9	37466994	37560951	Siae	Siae	sialic acid acetylesterase [Source:MGI Symbol;Acc:MGI:104803]	93957	-0.0450699	-0.212744	0.832202	0.98991	Decrease	nonDE	-0.160995	-0.745114	0.458925	0.930587	Decrease	nonDE	0.120631	0.516247	0.607458	0.88513	Increase	nonDE	-0.326696	-1.36536	0.176912	0.696674	Decrease	nonDE	-0.00379263	-0.01799	0.985703	0.999557	Decrease	nonDE	-0.338869	-1.58098	0.118802	0.866124	Decrease	nonDE	-0.41099	-1.90154	0.0617269	0.282469	Decrease
275	ENSMUSG00000001946	9	37439374	37449615	Esam	Esam	endothelial cell-specific adhesion molecule [Source:MGI Symbol;Acc:MGI:1916774]	10241	0.267489	0.969775	0.335803	0.937204	Increase	nonDE	-0.706028	-2.58849	0.0119131	0.857116	Decrease	nonDE	0.103103	0.356592	0.722568	0.926684	Increase	nonDE	-0.541642	-1.87751	0.0649978	0.659766	Decrease	nonDE	-0.0115856	-0.0535384	0.957469	0.999557	Decrease	nonDE	-0.0537171	-0.23387	0.815831	0.994687	Decrease	nonDE	0.534606	2.059	0.0435609	0.24243	Increase
276	ENSMUSG00000001948	9	37514586	37525018	Spa17	Spa17	sperm autoantigenic protein 17 [Source:MGI Symbol;Acc:MGI:1333778]	10432	-0.132172	-0.444547	0.658144	0.976798	Decrease	nonDE	-0.042298	-0.137877	0.89077	0.987639	Decrease	nonDE	-0.642394	-2.23439	0.02895	0.521489	Decrease	nonDE	0.467923	1.5608	0.123494	0.674283	Increase	nonDE	0.111522	0.400983	0.689765	0.999557	Increase	nonDE	-0.266496	-0.911515	0.365439	0.957293	Decrease	nonDE	-0.368754	-1.29372	0.200402	0.482673	Decrease
277	ENSMUSG00000001962	X	73356639	73363755	Fam50a	Fam50a	family with sequence similarity 50, member A [Source:MGI Symbol;Acc:MGI:1351626]	7116	-0.0147098	-0.0480591	0.961818	0.995525	Decrease	nonDE	-0.11007	-0.347627	0.729259	0.971324	Decrease	nonDE	0.0166505	0.0508933	0.959569	0.991563	Increase	nonDE	-0.14143	-0.416421	0.678493	0.912145	Decrease	nonDE	0.321515	1.2482	0.216496	0.999557	Increase	nonDE	-0.400634	-1.47133	0.146094	0.885939	Decrease	nonDE	0.501241	1.69911	0.0941456	0.341865	Increase
278	ENSMUSG00000001964	X	73298293	73305154	Emd	Emd	emerin [Source:MGI Symbol;Acc:MGI:108117]	6861	-0.0428691	-0.291677	0.771475	0.986803	Decrease	nonDE	-0.190693	-1.26839	0.209244	0.883214	Decrease	nonDE	-0.130822	-0.861981	0.39191	0.794994	Decrease	nonDE	-0.10274	-0.657438	0.513252	0.849419	Decrease	nonDE	0.0300259	0.209918	0.834397	0.999557	Increase	nonDE	-0.313598	-2.13747	0.0363784	0.767665	Decrease	nonDE	-0.273898	-1.82118	0.0732452	0.303367	Decrease
279	ENSMUSG00000001983	11	105956887	105964438	Taco1	Taco1	translational activator of mitochondrially encoded cytochrome c oxidase I [Source:MGI Symbol;Acc:MGI:1917457]	7551	0.0776609	0.148469	0.882439	0.994064	Increase	nonDE	0.197404	0.352964	0.725273	0.970323	Increase	nonDE	0.677547	1.2039	0.233054	0.709875	Increase	nonDE	-0.402483	-0.669692	0.505459	0.845926	Decrease	nonDE	-0.199973	-0.413001	0.680983	0.999557	Decrease	nonDE	-0.060597	-0.122823	0.902632	0.997348	Decrease	nonDE	0.0989105	0.184442	0.854249	0.941515	Increase
280	ENSMUSG00000001985	4	125384493	125607966	Grik3	Grik3	glutamate receptor, ionotropic, kainate 3 [Source:MGI Symbol;Acc:MGI:95816]	223473	0.35488	1.62961	0.108088	0.914925	Increase	nonDE	-0.0196422	-0.0836556	0.933591	0.993388	Decrease	nonDE	0.0576251	0.267904	0.789633	0.949762	Increase	nonDE	0.277613	1.18564	0.240141	0.725042	Increase	nonDE	0.125489	0.68958	0.492947	0.999557	Increase	nonDE	0.335303	1.63757	0.106409	0.854282	Increase	nonDE	0.674149	3.05849	0.00324411	0.088181	Increase
281	ENSMUSG00000001986	X	40489731	40767478	Gria3	Gria3	glutamate receptor, ionotropic, AMPA3 (alpha 3) [Source:MGI Symbol;Acc:MGI:95810]	277747	0.17481	1.1435	0.257084	0.919545	Increase	nonDE	-0.06125	-0.382308	0.703497	0.966789	Decrease	nonDE	0.381758	2.34648	0.0220534	0.493361	Increase	nonDE	-0.268198	-1.56937	0.121484	0.674283	Decrease	nonDE	0.119263	0.871516	0.386724	0.999557	Increase	nonDE	0.23538	1.59094	0.116541	0.866124	Increase	nonDE	0.545558	3.59609	0.000628302	0.0465404	Increase
282	ENSMUSG00000001995	8	126144802	126296547	Sipa1l2	Sipa1l2	signal-induced proliferation-associated 1 like 2 [Source:MGI Symbol;Acc:MGI:2676970]	151745	0.0139003	0.0956965	0.92406	0.994529	Increase	nonDE	-0.0704818	-0.468648	0.640911	0.959124	Decrease	nonDE	-0.040109	-0.266181	0.790954	0.949885	Decrease	nonDE	-0.0164725	-0.105007	0.916698	0.977314	Decrease	nonDE	0.00407587	0.0291583	0.976829	0.999557	Increase	nonDE	0.0941912	0.63378	0.528479	0.979776	Increase	nonDE	-0.0282187	-0.188522	0.851063	0.940107	Decrease
283	ENSMUSG00000001998	2	126850637	126909829	Ap4e1	Ap4e1	adaptor-related protein complex AP-4, epsilon 1 [Source:MGI Symbol;Acc:MGI:1336993]	59192	-0.15504	-0.376428	0.707841	0.985014	Decrease	nonDE	0.723108	1.54971	0.126134	0.866234	Increase	nonDE	-0.28063	-0.650828	0.517483	0.853729	Decrease	nonDE	0.848698	1.74191	0.0863193	0.662143	Increase	nonDE	0.245737	0.683575	0.496707	0.999557	Increase	nonDE	0.057669	0.14718	0.883452	0.995883	Increase	nonDE	-0.0791162	-0.214442	0.830883	0.929943	Decrease
284	ENSMUSG00000001999	2	126912585	126939004	Blvra	Blvra	biliverdin reductase A [Source:MGI Symbol;Acc:MGI:88170]	26419	-0.241542	-1.15984	0.250416	0.919545	Decrease	nonDE	0.42699	1.88575	0.0638597	0.857116	Increase	nonDE	-0.0578058	-0.258377	0.796943	0.951357	Decrease	nonDE	0.243253	1.00311	0.319577	0.762133	Increase	nonDE	-0.34412	-1.65022	0.103788	0.999557	Decrease	nonDE	0.00465999	0.0219382	0.982565	0.999888	Increase	nonDE	-0.51801	-2.35239	0.0217343	0.181959	Decrease
285	ENSMUSG00000002006	X	72836965	72868575	Pdzd4	Pdzd4	PDZ domain containing 4 [Source:MGI Symbol;Acc:MGI:2443483]	31610	0.279084	1.50753	0.136586	0.914925	Increase	nonDE	-0.142662	-0.725581	0.470736	0.930733	Decrease	nonDE	0.172974	0.899886	0.371548	0.786926	Increase	nonDE	-0.0365515	-0.17842	0.858956	0.963801	Decrease	nonDE	0.119535	0.705961	0.48277	0.999557	Increase	nonDE	-0.183793	-1.02921	0.307247	0.947522	Decrease	nonDE	0.127786	0.683218	0.496931	0.738726	Increase
286	ENSMUSG00000002007	X	72818011	72822531	Srpk3	Srpk3	serine/arginine-rich protein specific kinase 3 [Source:MGI Symbol;Acc:MGI:1891338]	4520	-0.693457	-1.2881	0.20234	0.914925	Decrease	nonDE	-0.378971	-0.707358	0.481907	0.931982	Decrease	nonDE	-0.988494	-1.79637	0.0771457	0.590291	Decrease	nonDE	-0.0839345	-0.151974	0.879685	0.966844	Decrease	nonDE	0.712578	1.40253	0.165579	0.999557	Increase	nonDE	0.154384	0.282285	0.778634	0.992561	Increase	nonDE	0.823725	1.54336	0.127665	0.392795	Increase
287	ENSMUSG00000002010	X	72822569	72830503	Idh3g	Idh3g	isocitrate dehydrogenase 3 (NAD+), gamma [Source:MGI Symbol;Acc:MGI:1099463]	7934	-0.0524231	-0.493925	0.623047	0.974913	Decrease	nonDE	-0.0330602	-0.301449	0.764048	0.976695	Decrease	nonDE	0.0429974	0.384393	0.701959	0.920626	Increase	nonDE	-0.128481	-1.10651	0.27264	0.746024	Decrease	nonDE	-0.19638	-1.96626	0.0536011	0.999557	Decrease	nonDE	-0.096399	-0.939129	0.351189	0.953432	Decrease	nonDE	-0.260702	-2.46087	0.0165629	0.162922	Decrease
288	ENSMUSG00000002012	X	72699600	72703723	Pnck	Pnck	pregnancy upregulated non-ubiquitously expressed CaM kinase [Source:MGI Symbol;Acc:MGI:1347357]	4123	-0.281898	-1.54765	0.126628	0.914925	Decrease	nonDE	-0.0374534	-0.202845	0.839898	0.984929	Decrease	nonDE	-0.165231	-0.855586	0.395413	0.796297	Decrease	nonDE	-0.154121	-0.782294	0.436921	0.817873	Decrease	nonDE	-0.474188	-2.92438	0.0047661	0.999557	Decrease	nonDE	0.134753	0.810738	0.420515	0.967487	Increase	nonDE	-0.443226	-2.53366	0.0137425	0.150655	Decrease
289	ENSMUSG00000002014	X	72830634	72834436	Ssr4	Ssr4	signal sequence receptor, delta [Source:MGI Symbol;Acc:MGI:1099464]	3802	-0.0268284	-0.177504	0.859672	0.992818	Decrease	nonDE	0.0256756	0.162309	0.871573	0.986868	Increase	nonDE	0.02413	0.151433	0.88011	0.97058	Increase	nonDE	-0.0252828	-0.151104	0.880368	0.966844	Decrease	nonDE	-0.348811	-2.39587	0.0195098	0.999557	Decrease	nonDE	-0.221362	-1.5192	0.133627	0.875182	Decrease	nonDE	-0.724892	-4.82081	9.14961e-06	0.0176188	Decrease
290	ENSMUSG00000002015	X	72729784	72759781	Bcap31	Bcap31	B cell receptor associated protein 31 [Source:MGI Symbol;Acc:MGI:1350933]	29997	0.0866094	0.704298	0.483797	0.959726	Increase	nonDE	-0.256583	-2.03548	0.0459396	0.857116	Decrease	nonDE	-0.139835	-1.11474	0.269122	0.7355	Decrease	nonDE	-0.030138	-0.232719	0.816721	0.953903	Decrease	nonDE	0.171772	1.51054	0.135818	0.999557	Increase	nonDE	-0.106718	-0.888387	0.377653	0.962347	Decrease	nonDE	0.281679	2.26032	0.0272048	0.198692	Increase
291	ENSMUSG00000002017	17	75844081	75858941	Fam98a	Fam98a	family with sequence similarity 98, member A [Source:MGI Symbol;Acc:MGI:1919972]	14860	0.0618524	0.245427	0.806909	0.989901	Increase	nonDE	-0.408025	-1.61226	0.111817	0.863659	Decrease	nonDE	-0.305928	-1.23152	0.222625	0.7037	Decrease	nonDE	-0.0402445	-0.159947	0.873426	0.966317	Decrease	nonDE	-0.249599	-1.14526	0.256358	0.999557	Decrease	nonDE	0.00838938	0.0368246	0.970739	0.999888	Increase	nonDE	-0.014913	-0.0602999	0.952104	0.98152	Decrease
292	ENSMUSG00000002020	12	84829986	84923306	Ltbp2	Ltbp2	latent transforming growth factor beta binding protein 2 [Source:MGI Symbol;Acc:MGI:99502]	93320	-0.356636	-1.03449	0.304791	0.924765	Decrease	nonDE	0.0464108	0.132131	0.895294	0.988503	Increase	nonDE	0.342247	0.871809	0.386565	0.794969	Increase	nonDE	-0.652472	-1.62637	0.108776	0.670911	Decrease	nonDE	0.116367	0.4757	0.635905	0.999557	Increase	nonDE	0.256383	0.917453	0.362343	0.956949	Increase	nonDE	0.213987	0.781545	0.437358	0.696936	Increase
293	ENSMUSG00000002028	9	44714652	44792594	Kmt2a	Kmt2a	lysine (K)-specific methyltransferase 2A [Source:MGI Symbol;Acc:MGI:96995]	77942	0.302648	2.16346	0.0342391	0.914925	Increase	nonDE	-0.0775635	-0.525652	0.600943	0.952574	Decrease	nonDE	0.515967	3.4645	0.000952252	0.430429	Increase	nonDE	-0.290882	-1.84886	0.0690888	0.659766	Decrease	nonDE	0.0876672	0.701313	0.485645	0.999557	Increase	nonDE	0.335064	2.46421	0.0164227	0.722317	Increase	nonDE	0.543081	3.90661	0.000227894	0.0344618	Increase
294	ENSMUSG00000002031	9	44679205	44704744	Ift46	Ift46	intraflagellar transport 46 [Source:MGI Symbol;Acc:MGI:1923818]	25539	-0.0823399	-0.476659	0.635226	0.975135	Decrease	nonDE	0.209354	1.14115	0.258052	0.896482	Increase	nonDE	-0.228292	-1.26929	0.208927	0.694012	Decrease	nonDE	0.355306	1.85409	0.0683262	0.659766	Increase	nonDE	-0.227921	-1.41466	0.162006	0.999557	Decrease	nonDE	0.0280788	0.167883	0.867204	0.995883	Increase	nonDE	-0.294583	-1.67694	0.0984224	0.348983	Decrease
295	ENSMUSG00000002032	9	44705066	44710604	Tmem25	Tmem25	transmembrane protein 25 [Source:MGI Symbol;Acc:MGI:1918937]	5538	0.136293	0.931383	0.355149	0.943336	Increase	nonDE	-0.00692895	-0.0448591	0.964359	0.997115	Decrease	nonDE	-0.0709686	-0.472904	0.637888	0.894949	Decrease	nonDE	0.200333	1.25807	0.212928	0.713917	Increase	nonDE	-0.075457	-0.558212	0.578644	0.999557	Decrease	nonDE	-0.0191978	-0.135518	0.892627	0.997348	Decrease	nonDE	0.204558	1.34964	0.181877	0.461072	Increase
296	ENSMUSG00000002043	7	19242320	19250070	Trappc6a	Trappc6a	trafficking protein particle complex 6A [Source:MGI Symbol;Acc:MGI:1914341]	7750	0.0912566	0.280403	0.780071	0.986803	Increase	nonDE	0.178138	0.503786	0.616138	0.957249	Increase	nonDE	0.355005	1.01881	0.312122	0.761965	Increase	nonDE	-0.0856104	-0.226711	0.82137	0.95439	Decrease	nonDE	-0.0583983	-0.177654	0.859555	0.999557	Decrease	nonDE	-0.275161	-0.823137	0.413481	0.965421	Decrease	nonDE	-0.0279752	-0.0767682	0.939047	0.976142	Decrease
297	ENSMUSG00000002052	11	78097572	78136813	Supt6	Supt6	SPT6, histone chaperone and transcription elongation factor [Source:MGI Symbol;Acc:MGI:107726]	39241	0.0817838	0.457088	0.649153	0.975654	Increase	nonDE	-0.197405	-1.07194	0.287764	0.903648	Decrease	nonDE	0.462208	2.36962	0.0208269	0.493144	Increase	nonDE	-0.577829	-2.86952	0.00556138	0.659766	Decrease	nonDE	-0.0539355	-0.332597	0.740523	0.999557	Decrease	nonDE	-0.0033091	-0.0194684	0.984528	0.999888	Decrease	nonDE	0.496721	2.71083	0.00860223	0.126195	Increase
298	ENSMUSG00000002055	11	78192355	78213283	Spag5	Spag5	sperm associated antigen 5 [Source:MGI Symbol;Acc:MGI:1927470]	20928	-0.105672	-0.486091	0.628559	0.975135	Decrease	nonDE	-0.218229	-1.00674	0.317845	0.907555	Decrease	nonDE	0.0819926	0.347664	0.729231	0.928541	Increase	nonDE	-0.405894	-1.71202	0.0917266	0.662143	Decrease	nonDE	-0.112923	-0.543195	0.588879	0.999557	Decrease	nonDE	-0.0535026	-0.245037	0.80721	0.994411	Decrease	nonDE	-0.0970844	-0.426393	0.671249	0.848104	Decrease
299	ENSMUSG00000002057	11	78248403	78277384	Foxn1	Foxn1	forkhead box N1 [Source:MGI Symbol;Acc:MGI:102949]	28981	-0.634786	-1.26488	0.210491	0.914925	Decrease	nonDE	0.303105	0.589322	0.557716	0.944608	Increase	nonDE	-0.108191	-0.206585	0.836988	0.960257	Decrease	nonDE	-0.22349	-0.413931	0.680306	0.912513	Decrease	nonDE	0.0770139	0.15063	0.88074	0.999557	Increase	nonDE	-0.181897	-0.345225	0.731055	0.992561	Decrease	nonDE	-0.791888	-1.51971	0.133499	0.399706	Decrease
300	ENSMUSG00000002058	11	78234308	78239990	Unc119	Unc119	unc-119 lipid binding chaperone [Source:MGI Symbol;Acc:MGI:1328357]	5682	-0.446603	-2.0316	0.0463433	0.914925	Decrease	nonDE	0.0664636	0.307153	0.759722	0.976695	Increase	nonDE	-0.408254	-1.77231	0.081094	0.592968	Decrease	nonDE	0.0281145	0.122809	0.902642	0.973742	Increase	nonDE	-0.16805	-0.849128	0.398969	0.999557	Decrease	nonDE	-0.198469	-0.993125	0.324382	0.949686	Decrease	nonDE	0.0901202	0.395662	0.693668	0.860641	Increase
301	ENSMUSG00000002059	11	78079256	78083019	Rab34	Rab34	RAB34, member RAS oncogene family [Source:MGI Symbol;Acc:MGI:104606]	3763	0.320613	1.26659	0.209884	0.914925	Increase	nonDE	-0.42614	-1.64465	0.104936	0.859258	Decrease	nonDE	0.270133	1.03936	0.302539	0.75651	Increase	nonDE	-0.37566	-1.40258	0.165565	0.692801	Decrease	nonDE	0.228141	1.05144	0.297001	0.999557	Increase	nonDE	-0.375443	-1.67788	0.0982393	0.849523	Decrease	nonDE	0.0567568	0.246039	0.806438	0.919517	Increase
302	ENSMUSG00000002064	11	78136572	78146322	Sdf2	Sdf2	stromal cell derived factor 2 [Source:MGI Symbol;Acc:MGI:108019]	9750	-0.00522009	-0.0179185	0.98576	0.997229	Decrease	nonDE	0.183841	0.586893	0.559337	0.944881	Increase	nonDE	-0.474402	-1.66851	0.100092	0.616931	Decrease	nonDE	0.653023	2.11195	0.038592	0.659766	Increase	nonDE	0.0200431	0.0711894	0.943469	0.999557	Increase	nonDE	-0.164147	-0.561814	0.576202	0.983222	Decrease	nonDE	-0.727943	-2.58737	0.0119481	0.14273	Decrease
303	ENSMUSG00000002068	7	37797409	37806959	Ccne1	Ccne1	cyclin E1 [Source:MGI Symbol;Acc:MGI:88316]	9550	-0.118192	-0.445372	0.657551	0.976798	Decrease	nonDE	0.224296	0.790801	0.431976	0.925602	Increase	nonDE	-0.461788	-1.77192	0.0811582	0.593206	Decrease	nonDE	0.567893	2.01796	0.0477837	0.659766	Increase	nonDE	-0.0712397	-0.276967	0.782696	0.999557	Decrease	nonDE	-0.0624464	-0.231133	0.817947	0.994687	Decrease	nonDE	-0.17882	-0.627074	0.532837	0.762302	Decrease
304	ENSMUSG00000002076	17	32163743	32255323	Hsf2bp	Hsf2bp	heat shock transcription factor 2 binding protein [Source:MGI Symbol;Acc:MGI:1921627]	91580	-0.98003	-1.67866	0.0980849	0.914925	Decrease	nonDE	0.139022	0.235483	0.814584	0.982828	Increase	nonDE	-1.2414	-2.07893	0.0416292	0.540815	Decrease	nonDE	0.400392	0.658007	0.512889	0.849419	Increase	nonDE	0.211272	0.360654	0.719544	0.999557	Increase	nonDE	-0.257358	-0.425043	0.672229	0.990618	Decrease	nonDE	-0.670117	-1.12538	0.264623	0.548802	Decrease
305	ENSMUSG00000002083	7	16042318	16052130	Bbc3	Bbc3	BCL2 binding component 3 [Source:MGI Symbol;Acc:MGI:2181667]	9812	-0.209975	-1.03789	0.303217	0.924765	Decrease	nonDE	0.200099	0.94023	0.350628	0.913265	Increase	nonDE	-0.134217	-0.633515	0.528651	0.854547	Decrease	nonDE	0.124341	0.556011	0.580138	0.874224	Increase	nonDE	-0.0606098	-0.33881	0.73586	0.999557	Decrease	nonDE	-0.0150798	-0.0798849	0.936578	0.999888	Decrease	nonDE	-0.256566	-1.35205	0.18111	0.459875	Decrease
306	ENSMUSG00000002100	2	90948489	90966861	Mybpc3	Mybpc3	myosin binding protein C, cardiac [Source:MGI Symbol;Acc:MGI:102844]	18372	0.0935325	0.383872	0.702343	0.98483	Increase	nonDE	0.0299442	0.115791	0.90818	0.990588	Increase	nonDE	0.4602	1.69851	0.0942599	0.608376	Increase	nonDE	-0.336723	-1.17526	0.244237	0.726621	Decrease	nonDE	-0.248663	-1.16634	0.247797	0.999557	Decrease	nonDE	-0.101639	-0.464444	0.643903	0.98961	Decrease	nonDE	-0.0646568	-0.276887	0.782758	0.907778	Decrease
307	ENSMUSG00000002102	2	90884354	90896714	Psmc3	Psmc3	proteasome (prosome, macropain) 26S subunit, ATPase 3 [Source:MGI Symbol;Acc:MGI:1098754]	12360	-0.00068706	-0.0052429	0.995833	0.998861	Decrease	nonDE	-0.0844366	-0.622864	0.535583	0.938043	Decrease	nonDE	0.116959	0.847195	0.400038	0.799154	Increase	nonDE	-0.202083	-1.40869	0.163759	0.69175	Decrease	nonDE	-0.112259	-0.918547	0.361775	0.999557	Decrease	nonDE	-0.0434799	-0.342267	0.73327	0.992561	Decrease	nonDE	0.0391591	0.29696	0.767457	0.900305	Increase
308	ENSMUSG00000002103	2	91033230	91044443	Acp2	Acp2	acid phosphatase 2, lysosomal [Source:MGI Symbol;Acc:MGI:87882]	11213	0.0391323	0.243117	0.808691	0.989901	Increase	nonDE	-0.0342271	-0.204228	0.838822	0.984929	Decrease	nonDE	0.248726	1.42675	0.158502	0.66899	Increase	nonDE	-0.243821	-1.34097	0.184662	0.699308	Decrease	nonDE	-0.0945139	-0.641088	0.523751	0.999557	Decrease	nonDE	-0.0047028	-0.0305073	0.975757	0.999888	Decrease	nonDE	-0.0615159	-0.387804	0.699445	0.864248	Decrease
309	ENSMUSG00000002104	2	90865965	90876074	Rapsn	Rapsn	receptor-associated protein of the synapse [Source:MGI Symbol;Acc:MGI:99422]	10109	-0.0590826	-0.115194	0.908734	0.994099	Decrease	nonDE	-0.371026	-0.707492	0.482413	0.932056	Decrease	nonDE	-0.948455	-1.82821	0.073243	0.583806	Decrease	nonDE	0.518346	0.969711	0.336669	0.76988	Increase	nonDE	-0.234396	-0.471088	0.639544	0.999557	Decrease	nonDE	0.904961	1.73597	0.0884786	0.839417	Increase	nonDE	0.39622	0.757476	0.452176	0.706734	Increase
310	ENSMUSG00000002105	2	90892136	90900762	Slc39a13	Slc39a13	solute carrier family 39 (metal ion transporter), member 13 [Source:MGI Symbol;Acc:MGI:1915677]	8626	0.151377	0.652623	0.516332	0.962951	Increase	nonDE	-0.349112	-1.48928	0.141316	0.866234	Decrease	nonDE	0.139151	0.568819	0.571466	0.870529	Increase	nonDE	-0.336887	-1.35348	0.180654	0.697579	Decrease	nonDE	0.00682515	0.0356757	0.971652	0.999557	Increase	nonDE	0.260458	1.21807	0.227659	0.924219	Increase	nonDE	0.343393	1.50081	0.138314	0.407348	Increase
311	ENSMUSG00000002107	2	6544505	7514374	Celf2	Celf2	CUGBP, Elav-like family member 2 [Source:MGI Symbol;Acc:MGI:1338822]	969869	0.202117	2.04243	0.0452252	0.914925	Increase	nonDE	0.0793801	0.755859	0.452501	0.930047	Increase	nonDE	0.263967	2.54511	0.0133407	0.455927	Increase	nonDE	0.0175293	0.158854	0.874283	0.966339	Increase	nonDE	0.194366	2.14286	0.0359255	0.999557	Increase	nonDE	0.220759	2.24291	0.028366	0.759871	Increase	nonDE	0.338103	3.43947	0.00102958	0.0558261	Increase
312	ENSMUSG00000002108	2	91014406	91033179	Nr1h3	Nr1h3	nuclear receptor subfamily 1, group H, member 3 [Source:MGI Symbol;Acc:MGI:1352462]	18773	-0.0166612	-0.0657204	0.947805	0.995429	Decrease	nonDE	-0.161512	-0.619486	0.537791	0.938043	Decrease	nonDE	0.0191132	0.0717264	0.943043	0.986689	Increase	nonDE	-0.197287	-0.716192	0.476473	0.834388	Decrease	nonDE	-0.298804	-1.31112	0.194494	0.999557	Decrease	nonDE	-0.0463544	-0.19899	0.8429	0.995883	Decrease	nonDE	-0.271261	-1.08872	0.280354	0.563931	Decrease
313	ENSMUSG00000002109	2	91041917	91067327	Ddb2	Ddb2	damage specific DNA binding protein 2 [Source:MGI Symbol;Acc:MGI:1355314]	25410	-0.230722	-0.730165	0.467949	0.959726	Decrease	nonDE	0.277415	0.816513	0.41723	0.924801	Increase	nonDE	-0.294524	-0.891964	0.375747	0.789281	Decrease	nonDE	0.341217	0.959329	0.340996	0.771209	Increase	nonDE	-0.382482	-1.26976	0.208761	0.999557	Decrease	nonDE	0.0154832	0.0505653	0.959829	0.999888	Increase	nonDE	-0.745556	-2.38344	0.0201241	0.176349	Decrease
314	ENSMUSG00000002111	2	90912735	90946101	Spi1	Spi1	spleen focus forming virus (SFFV) proviral integration oncogene [Source:MGI Symbol;Acc:MGI:98282]	33366	-0.113769	-0.226932	0.821198	0.989901	Decrease	nonDE	0.591958	1.12301	0.265622	0.898505	Increase	nonDE	0.0604971	0.11593	0.90807	0.977352	Increase	nonDE	0.417692	0.758196	0.451111	0.823063	Increase	nonDE	-1.79275	-3.79687	0.000327793	0.999557	Decrease	nonDE	0.466887	1.00458	0.318873	0.947522	Increase	nonDE	-1.55354	-3.0818	0.00303109	0.0868898	Decrease
315	ENSMUSG00000002129	11	4110350	4132541	Sf3a1	Sf3a1	splicing factor 3a, subunit 1 [Source:MGI Symbol;Acc:MGI:1914715]	22191	-0.039581	-0.354526	0.724108	0.986466	Decrease	nonDE	0.144728	1.23175	0.222541	0.886319	Increase	nonDE	0.100798	0.846722	0.400299	0.79919	Increase	nonDE	0.00434821	0.0346488	0.972467	0.995265	Increase	nonDE	0.0871014	0.831287	0.408896	0.999557	Increase	nonDE	0.0830252	0.739568	0.462261	0.975671	Increase	nonDE	0.0748347	0.665292	0.50825	0.746659	Increase
316	ENSMUSG00000002147	10	127478855	127496826	Stat6	Stat6	signal transducer and activator of transcription 6 [Source:MGI Symbol;Acc:MGI:103034]	17971	0.549753	1.24617	0.217237	0.914925	Increase	nonDE	-0.75462	-1.68078	0.0976715	0.857116	Decrease	nonDE	0.0569235	0.13167	0.895658	0.974984	Increase	nonDE	-0.261791	-0.589623	0.557515	0.86578	Decrease	nonDE	0.171579	0.408295	0.684418	0.999557	Increase	nonDE	0.352798	0.748954	0.456624	0.975671	Increase	nonDE	0.485631	1.04266	0.301023	0.584286	Increase
317	ENSMUSG00000002190	8	84116496	84155181	Clgn	Clgn	calmegin [Source:MGI Symbol;Acc:MGI:107472]	38685	0.409421	1.74299	0.0861297	0.914925	Increase	nonDE	-0.365055	-1.49405	0.140068	0.866234	Decrease	nonDE	0.183686	0.774451	0.441511	0.816906	Increase	nonDE	-0.139321	-0.560654	0.576987	0.872637	Decrease	nonDE	0.120541	0.570397	0.570402	0.999557	Increase	nonDE	-0.110169	-0.489008	0.626505	0.98827	Decrease	nonDE	0.164755	0.705763	0.482892	0.727453	Increase
318	ENSMUSG00000002205	7	44397837	44426939	Vrk3	Vrk3	vaccinia related kinase 3 [Source:MGI Symbol;Acc:MGI:2182465]	29102	-0.321023	-1.43367	0.156526	0.914925	Decrease	nonDE	0.0736751	0.32427	0.746789	0.97537	Increase	nonDE	-0.445389	-1.95712	0.0546897	0.561567	Decrease	nonDE	0.198041	0.851038	0.397915	0.801086	Increase	nonDE	0.0161083	0.0883653	0.929862	0.999557	Increase	nonDE	0.264082	1.27997	0.205166	0.910073	Increase	nonDE	0.174494	0.834621	0.40703	0.674549	Increase
319	ENSMUSG00000002210	7	24099044	24122203	Smg9	Smg9	SMG9 nonsense mediated mRNA decay factor [Source:MGI Symbol;Acc:MGI:1919247]	23159	-0.506333	-2.14957	0.0353687	0.914925	Decrease	nonDE	0.118841	0.514165	0.608904	0.954479	Increase	nonDE	-0.015159	-0.0567485	0.954922	0.989743	Decrease	nonDE	-0.372334	-1.40394	0.165162	0.692801	Decrease	nonDE	-0.426642	-2.07235	0.0422584	0.999557	Decrease	nonDE	-0.194911	-0.97153	0.334935	0.951231	Decrease	nonDE	-0.00777787	-0.0318648	0.974679	0.991631	Decrease
320	ENSMUSG00000002221	5	27945078	27996689	Paxip1	Paxip1	PAX interacting (with transcription-activation domain) protein 1 [Source:MGI Symbol;Acc:MGI:1890430]	51611	-0.126488	-0.62813	0.53215	0.964584	Decrease	nonDE	0.221237	1.03299	0.305491	0.907555	Increase	nonDE	-0.222224	-1.07048	0.288415	0.747003	Decrease	nonDE	0.316974	1.42953	0.157707	0.690339	Increase	nonDE	0.229572	1.2251	0.225019	0.999557	Increase	nonDE	0.0264888	0.129931	0.897027	0.997348	Increase	nonDE	0.014382	0.0725336	0.942403	0.977116	Increase
321	ENSMUSG00000002222	6	71365618	71417621	Rmnd5a	Rmnd5a	required for meiotic nuclear division 5 homolog A [Source:MGI Symbol;Acc:MGI:1915727]	52003	-0.0944068	-0.567045	0.572663	0.971727	Decrease	nonDE	0.26842	1.52623	0.13187	0.866234	Increase	nonDE	-0.0967844	-0.558905	0.578173	0.872461	Decrease	nonDE	0.270798	1.47482	0.145154	0.684075	Increase	nonDE	0.0930432	0.581735	0.562785	0.999557	Increase	nonDE	0.0138628	0.0818788	0.934998	0.999888	Increase	nonDE	-0.166136	-0.990408	0.325698	0.607305	Decrease
322	ENSMUSG00000002227	3	104702152	104725879	Mov10	Mov10	Mov10 RISC complex RNA helicase [Source:MGI Symbol;Acc:MGI:97054]	23727	-0.628087	-1.27035	0.208552	0.914925	Decrease	nonDE	0.0988662	0.19652	0.844825	0.985587	Increase	nonDE	-0.6186	-1.21107	0.230313	0.708818	Decrease	nonDE	0.089379	0.170778	0.864936	0.965038	Increase	nonDE	-0.216277	-0.437266	0.663388	0.999557	Decrease	nonDE	-0.296494	-0.587223	0.559116	0.983222	Decrease	nonDE	-0.75892	-1.49628	0.139486	0.408753	Decrease
323	ENSMUSG00000002228	3	104688372	104693334	Ppm1j	Ppm1j	protein phosphatase 1J [Source:MGI Symbol;Acc:MGI:1919137]	4962	-0.337926	-0.67127	0.50446	0.962756	Decrease	nonDE	-0.212395	-0.414722	0.67973	0.964575	Decrease	nonDE	-1.20712	-2.3831	0.0201412	0.493144	Decrease	nonDE	0.656802	1.26435	0.210682	0.711396	Increase	nonDE	0.741935	1.49552	0.139685	0.999557	Increase	nonDE	-0.614648	-1.19179	0.237738	0.926643	Decrease	nonDE	0.0732949	0.144328	0.885694	0.954221	Increase
324	ENSMUSG00000002233	3	104695691	104701775	Rhoc	Rhoc	ras homolog family member C [Source:MGI Symbol;Acc:MGI:106028]	6084	-0.128698	-0.619175	0.537995	0.964771	Decrease	nonDE	-0.147167	-0.695515	0.489246	0.933225	Decrease	nonDE	-0.0791528	-0.362881	0.717887	0.925558	Decrease	nonDE	-0.196713	-0.880366	0.381949	0.795932	Decrease	nonDE	0.0379006	0.197482	0.844075	0.999557	Increase	nonDE	-0.314678	-1.59067	0.116603	0.866124	Decrease	nonDE	-0.116389	-0.57248	0.568999	0.784628	Decrease
325	ENSMUSG00000002249	17	28550645	28569791	Tead3	Tead3	TEA domain family member 3 [Source:MGI Symbol;Acc:MGI:109241]	19146	-0.929513	-1.7206	0.0901469	0.914925	Decrease	nonDE	0.345952	0.631411	0.530016	0.93752	Increase	nonDE	-0.394691	-0.693731	0.490356	0.839224	Decrease	nonDE	-0.18887	-0.325188	0.746097	0.932266	Decrease	nonDE	-0.766485	-1.50711	0.136695	0.999557	Decrease	nonDE	0.853028	1.60239	0.113985	0.863837	Increase	nonDE	0.369749	0.658443	0.512611	0.749536	Increase
326	ENSMUSG00000002250	17	28451674	28520448	Ppard	Ppard	peroxisome proliferator activator receptor delta [Source:MGI Symbol;Acc:MGI:101884]	68774	0.0430231	0.220271	0.82636	0.98991	Increase	nonDE	-0.0283107	-0.137648	0.89095	0.987686	Decrease	nonDE	0.23922	1.1258	0.264447	0.732948	Increase	nonDE	-0.224508	-1.00368	0.319305	0.762124	Decrease	nonDE	-0.157997	-0.938597	0.35146	0.999557	Decrease	nonDE	0.394888	2.10209	0.0394783	0.781166	Increase	nonDE	0.532172	2.60822	0.0113108	0.13957	Increase
327	ENSMUSG00000002257	17	28426752	28447582	Def6	Def6	differentially expressed in FDCP 6 [Source:MGI Symbol;Acc:MGI:1346328]	20830	0.251245	0.515569	0.607929	0.974472	Increase	nonDE	-0.916699	-1.86384	0.0669238	0.857116	Decrease	nonDE	0.000369736	0.000738489	0.999413	0.999886	Increase	nonDE	-0.665824	-1.30761	0.195673	0.705737	Decrease	nonDE	-0.512808	-1.0448	0.300039	0.999557	Decrease	nonDE	-0.58985	-1.19721	0.235633	0.925473	Decrease	nonDE	-0.368419	-0.722538	0.472591	0.721039	Decrease
328	ENSMUSG00000002265	7	6706891	6733430	Peg3	Peg3	paternally expressed 3 [Source:MGI Symbol;Acc:MGI:104748]	26539	0.129041	1.22743	0.224149	0.9164	Increase	nonDE	-0.197311	-1.81882	0.0736091	0.857116	Decrease	nonDE	-0.0713076	-0.662712	0.50989	0.849682	Decrease	nonDE	0.00303828	0.0271845	0.978397	0.996768	Increase	nonDE	0.0722546	0.744698	0.459175	0.999557	Increase	nonDE	0.000515614	0.00503193	0.996001	0.999888	Increase	nonDE	0.275703	2.60987	0.011262	0.139518	Increase
329	ENSMUSG00000002266	7	6674268	6699449	Zim1	Zim1	zinc finger, imprinted 1 [Source:MGI Symbol;Acc:MGI:1341879]	25181	0.0735077	0.142926	0.886796	0.994099	Increase	nonDE	-0.0903344	-0.1689	0.866407	0.986868	Decrease	nonDE	0.877455	1.56814	0.12177	0.638809	Increase	nonDE	-0.894282	-1.53442	0.129847	0.675353	Decrease	nonDE	-0.837421	-1.77231	0.0810931	0.999557	Decrease	nonDE	0.900325	1.78676	0.0787039	0.834439	Increase	nonDE	0.18574	0.337729	0.736671	0.883618	Increase
330	ENSMUSG00000002274	17	26012195	26016110	Metrn	Metrn	meteorin, glial cell differentiation regulator [Source:MGI Symbol;Acc:MGI:1917333]	3915	-0.122588	-0.896698	0.373234	0.944702	Decrease	nonDE	0.10434	0.733072	0.466186	0.930733	Increase	nonDE	0.0428167	0.296465	0.767833	0.942732	Increase	nonDE	-0.0610642	-0.404633	0.687094	0.914124	Decrease	nonDE	-0.369642	-2.81781	0.00642161	0.999557	Decrease	nonDE	-0.071098	-0.532933	0.595922	0.984457	Decrease	nonDE	-0.437431	-3.15755	0.00242557	0.0796526	Decrease
331	ENSMUSG00000002279	17	25798059	25881800	Lmf1	Lmf1	lipase maturation factor 1 [Source:MGI Symbol;Acc:MGI:1923733]	83741	0.0763303	0.2547	0.79977	0.988242	Increase	nonDE	-0.262306	-0.869762	0.387675	0.916342	Decrease	nonDE	-0.283458	-0.976612	0.332431	0.771159	Decrease	nonDE	0.0974828	0.330733	0.741925	0.929964	Increase	nonDE	-0.261067	-1.00501	0.318672	0.999557	Decrease	nonDE	-0.00188741	-0.0070188	0.994422	0.999888	Decrease	nonDE	0.142625	0.48159	0.631737	0.823649	Increase
332	ENSMUSG00000002280	17	25992750	26002306	Ciao3	Ciao3	cytosolic iron-sulfur assembly component 3 [Source:MGI Symbol;Acc:MGI:1914813]	9556	0.450348	1.63502	0.106946	0.914925	Increase	nonDE	-0.259765	-0.879411	0.382462	0.916342	Decrease	nonDE	0.409903	1.41706	0.161305	0.670364	Increase	nonDE	-0.21932	-0.706113	0.482676	0.835897	Decrease	nonDE	0.0446726	0.188427	0.851137	0.999557	Increase	nonDE	-0.350694	-1.44203	0.15416	0.89229	Decrease	nonDE	-0.111189	-0.436301	0.664084	0.843804	Decrease
333	ENSMUSG00000002289	17	33992724	34000804	Angptl4	Angptl4	angiopoietin-like 4 [Source:MGI Symbol;Acc:MGI:1888999]	8080	-0.266665	-0.520388	0.604585	0.974472	Decrease	nonDE	-0.0701974	-0.133965	0.89385	0.98807	Decrease	nonDE	-0.295794	-0.559114	0.578032	0.872461	Decrease	nonDE	-0.0410687	-0.0754126	0.940121	0.985779	Decrease	nonDE	-0.0617562	-0.126035	0.900098	0.999557	Decrease	nonDE	-0.430569	-0.86354	0.391059	0.962487	Decrease	nonDE	0.00244732	0.00476427	0.996213	0.999072	Increase
334	ENSMUSG00000002297	5	8446973	8472716	Dbf4	Dbf4	DBF4 zinc finger [Source:MGI Symbol;Acc:MGI:1351328]	25743	0.612604	1.3065	0.196049	0.914925	Increase	nonDE	-0.196198	-0.382369	0.703452	0.966789	Decrease	nonDE	0.27236	0.573084	0.568593	0.86985	Increase	nonDE	0.144045	0.275492	0.783824	0.94391	Increase	nonDE	-0.246411	-0.500058	0.618746	0.999557	Decrease	nonDE	-0.0263016	-0.051781	0.958864	0.999888	Decrease	nonDE	-0.536142	-1.05111	0.297152	0.58111	Decrease
335	ENSMUSG00000002307	17	34128388	34134564	Daxx	Daxx	Fas death domain-associated protein [Source:MGI Symbol;Acc:MGI:1197015]	6176	0.174673	1.00516	0.318597	0.930434	Increase	nonDE	-0.0764513	-0.419767	0.676059	0.964168	Decrease	nonDE	0.168175	0.913094	0.364614	0.785779	Increase	nonDE	-0.0699531	-0.361438	0.71896	0.923027	Decrease	nonDE	0.0888031	0.580455	0.563642	0.999557	Increase	nonDE	0.109812	0.660438	0.511339	0.979776	Increase	nonDE	0.143938	0.848157	0.399505	0.669323	Increase
336	ENSMUSG00000002308	17	34062065	34068748	Cd320	Cd320	CD320 antigen [Source:MGI Symbol;Acc:MGI:1860083]	6683	-0.429829	-2.35196	0.0217573	0.914925	Decrease	nonDE	0.578477	2.8854	0.00531942	0.857116	Increase	nonDE	-0.0314852	-0.153438	0.878535	0.970338	Decrease	nonDE	0.180134	0.808903	0.421562	0.810188	Increase	nonDE	-0.0882176	-0.459015	0.647776	0.999557	Decrease	nonDE	-0.216503	-1.10796	0.272019	0.937932	Decrease	nonDE	-0.249983	-1.21557	0.228604	0.512439	Decrease
337	ENSMUSG00000002319	14	55862857	55873414	Ipo4	Ipo4	importin 4 [Source:MGI Symbol;Acc:MGI:1923001]	10557	-0.00386601	-0.0213084	0.983066	0.996967	Decrease	nonDE	-0.025124	-0.133556	0.894172	0.988251	Decrease	nonDE	0.130761	0.667282	0.506986	0.848345	Increase	nonDE	-0.159751	-0.784282	0.435762	0.817621	Decrease	nonDE	0.0722942	0.435922	0.664358	0.999557	Increase	nonDE	-0.231175	-1.34146	0.184504	0.899859	Decrease	nonDE	0.34292	1.79313	0.0776678	0.312276	Increase
338	ENSMUSG00000002320	14	55873422	55881263	Tm9sf1	Tm9sf1	transmembrane 9 superfamily member 1 [Source:MGI Symbol;Acc:MGI:1921390]	7841	-0.0860216	-0.166491	0.868295	0.992818	Decrease	nonDE	0.587574	1.05448	0.29562	0.905029	Increase	nonDE	-0.0865424	-0.161301	0.872364	0.969484	Decrease	nonDE	0.588095	1.01388	0.314449	0.760824	Increase	nonDE	-0.228914	-0.419941	0.675932	0.999557	Decrease	nonDE	0.0613433	0.10894	0.91359	0.998625	Increase	nonDE	-1.05712	-1.9449	0.0561746	0.270752	Decrease
339	ENSMUSG00000002324	14	55855494	55862852	Rec8	Rec8	REC8 meiotic recombination protein [Source:MGI Symbol;Acc:MGI:1929645]	7358	-0.440289	-1.47501	0.145104	0.914925	Decrease	nonDE	0.204925	0.673989	0.502741	0.935561	Increase	nonDE	-0.513498	-1.63703	0.106522	0.620794	Decrease	nonDE	0.278133	0.865153	0.39018	0.800266	Increase	nonDE	-0.13664	-0.515891	0.607705	0.999557	Decrease	nonDE	0.310213	1.05785	0.294095	0.943286	Increase	nonDE	-0.125402	-0.433363	0.666206	0.844742	Decrease
340	ENSMUSG00000002325	14	55841028	55847487	Irf9	Irf9	interferon regulatory factor 9 [Source:MGI Symbol;Acc:MGI:107587]	6459	0.732865	2.20727	0.0308813	0.914925	Increase	nonDE	-0.834002	-2.47589	0.0159414	0.857116	Decrease	nonDE	-0.265495	-0.895203	0.374027	0.788092	Decrease	nonDE	0.164357	0.539321	0.591533	0.878453	Increase	nonDE	0.0606809	0.230585	0.818371	0.999557	Increase	nonDE	-0.0554541	-0.198037	0.843643	0.995883	Decrease	nonDE	-0.119998	-0.425506	0.671893	0.848364	Decrease
341	ENSMUSG00000002326	14	55909398	55916657	Gmpr2	Gmpr2	guanosine monophosphate reductase 2 [Source:MGI Symbol;Acc:MGI:1917903]	7259	-0.283926	-0.799278	0.42708	0.954235	Decrease	nonDE	0.0348245	0.0972077	0.922865	0.992133	Increase	nonDE	-0.0677824	-0.175364	0.861347	0.966968	Decrease	nonDE	-0.181319	-0.462198	0.645504	0.899241	Decrease	nonDE	0.264796	0.690766	0.492206	0.999557	Increase	nonDE	-0.584036	-1.50701	0.136719	0.879163	Decrease	nonDE	-0.508613	-1.34669	0.182822	0.462474	Decrease
342	ENSMUSG00000002329	14	55895336	55897965	Mdp1	Mdp1	magnesium-dependent phosphatase 1 [Source:MGI Symbol;Acc:MGI:1915131]	2629	-0.181356	-0.94032	0.350582	0.941652	Decrease	nonDE	0.0541034	0.271141	0.787154	0.979358	Increase	nonDE	0.249521	1.15058	0.254176	0.725175	Increase	nonDE	-0.376774	-1.67873	0.0980725	0.667737	Decrease	nonDE	-0.207921	-1.1509	0.254048	0.999557	Decrease	nonDE	-0.114414	-0.616273	0.539896	0.981068	Decrease	nonDE	-0.280411	-1.45439	0.150715	0.423706	Decrease
343	ENSMUSG00000002332	14	55976477	55983147	Dhrs1	Dhrs1	dehydrogenase/reductase (SDR family) member 1 [Source:MGI Symbol;Acc:MGI:1196314]	6670	-0.0942664	-0.665158	0.508335	0.962951	Decrease	nonDE	-0.188547	-1.30593	0.196241	0.882493	Decrease	nonDE	-0.188567	-1.2902	0.201614	0.68964	Decrease	nonDE	-0.0942463	-0.628605	0.531841	0.857129	Decrease	nonDE	-0.155517	-1.13528	0.260486	0.999557	Decrease	nonDE	-0.195988	-1.40226	0.165661	0.895628	Decrease	nonDE	-0.326415	-2.25404	0.0276187	0.200181	Decrease
344	ENSMUSG00000002341	8	70545735	70573523	Ncan	Ncan	neurocan [Source:MGI Symbol;Acc:MGI:104694]	27788	-0.0820141	-0.369682	0.712838	0.985902	Decrease	nonDE	-0.314293	-1.43278	0.156779	0.868326	Decrease	nonDE	-0.0460999	-0.19424	0.846602	0.96209	Decrease	nonDE	-0.350207	-1.47848	0.144175	0.683879	Decrease	nonDE	0.27122	1.3285	0.188721	0.999557	Increase	nonDE	-0.117576	-0.534194	0.595054	0.984457	Decrease	nonDE	-0.0780094	-0.366268	0.715371	0.873005	Decrease
345	ENSMUSG00000002342	8	70625006	70636331	Tmem161a	Tmem161a	transmembrane protein 161A [Source:MGI Symbol;Acc:MGI:2384577]	11325	0.0978863	0.470734	0.639428	0.975187	Increase	nonDE	-0.248777	-1.16109	0.249911	0.896322	Decrease	nonDE	0.352109	1.51738	0.134087	0.649791	Increase	nonDE	-0.503	-2.10056	0.0396176	0.659766	Decrease	nonDE	0.0456613	0.241752	0.809744	0.999557	Increase	nonDE	0.00264284	0.0130286	0.989645	0.999888	Increase	nonDE	-0.00875217	-0.0430842	0.965768	0.987072	Decrease
346	ENSMUSG00000002343	8	70672822	70687116	Armc6	Armc6	armadillo repeat containing 6 [Source:MGI Symbol;Acc:MGI:1924063]	14294	-0.0595705	-0.203469	0.839413	0.990197	Decrease	nonDE	-0.163104	-0.552811	0.582315	0.951194	Decrease	nonDE	-0.41174	-1.4118	0.162843	0.673266	Decrease	nonDE	0.189066	0.637866	0.525832	0.855323	Increase	nonDE	-0.0901474	-0.315495	0.75341	0.999557	Decrease	nonDE	-0.426513	-1.51542	0.134582	0.875182	Decrease	nonDE	-0.180839	-0.573007	0.568644	0.784387	Decrease
347	ENSMUSG00000002345	8	70592149	70599969	Borcs8	Borcs8	BLOC-1 related complex subunit 8 [Source:MGI Symbol;Acc:MGI:1919618]	7820	0.150901	0.670805	0.504754	0.962756	Increase	nonDE	-0.183488	-0.775471	0.440912	0.929096	Decrease	nonDE	0.429238	1.68605	0.0966473	0.612848	Increase	nonDE	-0.461824	-1.73086	0.0882863	0.662143	Decrease	nonDE	-0.0105489	-0.052155	0.958567	0.999557	Decrease	nonDE	-0.206303	-0.979344	0.331091	0.95087	Decrease	nonDE	-0.0732823	-0.333587	0.739779	0.885525	Decrease
348	ENSMUSG00000002346	8	70636990	70664955	Slc25a42	Slc25a42	solute carrier family 25, member 42 [Source:MGI Symbol;Acc:MGI:1920345]	27965	9.06244e-05	0.000185182	0.999853	0.999858	Increase	nonDE	0.628387	1.14534	0.256325	0.896346	Increase	nonDE	-0.140524	-0.279753	0.780567	0.947096	Decrease	nonDE	0.769001	1.36266	0.177758	0.697053	Increase	nonDE	0.0159416	0.0318081	0.974724	0.999557	Increase	nonDE	0.442586	0.795953	0.428996	0.970368	Increase	nonDE	-0.171766	-0.316602	0.752574	0.892683	Decrease
349	ENSMUSG00000002365	17	5891604	5982229	Snx9	Snx9	sorting nexin 9 [Source:MGI Symbol;Acc:MGI:1913866]	90625	0.384632	0.833033	0.407918	0.949611	Increase	nonDE	-0.253381	-0.523935	0.60213	0.952673	Decrease	nonDE	0.802818	1.61675	0.110842	0.625712	Increase	nonDE	-0.671568	-1.2894	0.20189	0.706665	Decrease	nonDE	-0.638241	-1.44476	0.153396	0.999557	Decrease	nonDE	1.17461	2.36479	0.0210783	0.746448	Increase	nonDE	-0.253459	-0.515738	0.607811	0.809393	Decrease
350	ENSMUSG00000002372	17	56980294	57018764	Ranbp3	Ranbp3	RAN binding protein 3 [Source:MGI Symbol;Acc:MGI:1919060]	38470	-0.130725	-0.612775	0.542192	0.965834	Decrease	nonDE	0.201929	0.894913	0.374181	0.916342	Increase	nonDE	0.255817	1.06818	0.289444	0.747303	Increase	nonDE	-0.184613	-0.731686	0.467026	0.829983	Decrease	nonDE	0.177622	0.92715	0.357325	0.999557	Increase	nonDE	-0.250943	-1.25112	0.215438	0.919131	Decrease	nonDE	0.0179287	0.0880179	0.930137	0.972879	Increase
351	ENSMUSG00000002379	17	57024767	57029141	Ndufa11	Ndufa11	NADH:ubiquinone oxidoreductase subunit A11 [Source:MGI Symbol;Acc:MGI:1917125]	4374	-0.118747	-1.02358	0.309881	0.925736	Decrease	nonDE	-0.180292	-1.52764	0.13152	0.866234	Decrease	nonDE	-0.257542	-2.15939	0.0345667	0.528749	Decrease	nonDE	-0.0414979	-0.339583	0.73528	0.92731	Decrease	nonDE	-0.123814	-1.1027	0.274279	0.999557	Decrease	nonDE	-0.413412	-3.65585	0.000518732	0.679842	Decrease	nonDE	-0.319025	-2.70206	0.00880811	0.127177	Decrease
352	ENSMUSG00000002393	8	71826767	71834604	Nr2f6	Nr2f6	nuclear receptor subfamily 2, group F, member 6 [Source:MGI Symbol;Acc:MGI:1352453]	7837	0.388718	1.96055	0.0542792	0.914925	Increase	nonDE	-0.0299358	-0.139102	0.889806	0.987467	Decrease	nonDE	0.404199	1.92408	0.0587856	0.568511	Increase	nonDE	-0.0454163	-0.199382	0.842595	0.959622	Decrease	nonDE	-0.1961	-1.11341	0.269688	0.999557	Decrease	nonDE	0.106823	0.573794	0.568114	0.983222	Increase	nonDE	-0.190499	-0.979598	0.330966	0.611827	Decrease
353	ENSMUSG00000002395	8	71819492	71822376	Use1	Use1	unconventional SNARE in the ER 1 homolog (S. cerevisiae) [Source:MGI Symbol;Acc:MGI:1914273]	2884	-0.249408	-2.09621	0.0400153	0.914925	Decrease	nonDE	0.0574363	0.470165	0.639832	0.959124	Increase	nonDE	-0.105245	-0.83234	0.408307	0.802637	Decrease	nonDE	-0.0867262	-0.664833	0.508542	0.847449	Decrease	nonDE	-0.0701134	-0.630501	0.530608	0.999557	Decrease	nonDE	-0.147583	-1.28217	0.204398	0.909037	Decrease	nonDE	-0.263525	-2.24585	0.0281672	0.201775	Decrease
354	ENSMUSG00000002396	8	71823942	71832005	Ocel1	Ocel1	occludin/ELL domain containing 1 [Source:MGI Symbol;Acc:MGI:1924340]	8063	-0.471412	-1.21125	0.230245	0.919218	Decrease	nonDE	0.0105496	0.0274698	0.97817	0.998082	Increase	nonDE	-0.622834	-1.55019	0.126018	0.642709	Decrease	nonDE	0.161972	0.404837	0.686945	0.914018	Increase	nonDE	0.279237	0.744698	0.459175	0.999557	Increase	nonDE	-0.793306	-2.11901	0.0379682	0.77358	Decrease	nonDE	0.150781	0.375736	0.708354	0.869886	Increase
355	ENSMUSG00000002409	7	27878894	27886719	Dyrk1b	Dyrk1b	dual-specificity tyrosine-(Y)-phosphorylation regulated kinase 1b [Source:MGI Symbol;Acc:MGI:1330302]	7825	0.723759	1.65213	0.103398	0.914925	Increase	nonDE	-0.560911	-1.21475	0.228918	0.89017	Decrease	nonDE	0.376123	0.857088	0.394588	0.796155	Increase	nonDE	-0.213275	-0.45756	0.648815	0.900449	Decrease	nonDE	-0.08669	-0.215457	0.830095	0.999557	Decrease	nonDE	-0.0481182	-0.115579	0.908348	0.99848	Decrease	nonDE	0.0391159	0.0883785	0.929851	0.972846	Increase
356	ENSMUSG00000002413	6	39580171	39702397	Braf	Braf	Braf transforming gene [Source:MGI Symbol;Acc:MGI:88190]	122226	0.18032	1.56064	0.123531	0.914925	Increase	nonDE	-0.12233	-1.01578	0.313552	0.907555	Decrease	nonDE	0.233316	1.92427	0.0587611	0.568511	Increase	nonDE	-0.175326	-1.38172	0.171853	0.694423	Decrease	nonDE	0.0649534	0.61557	0.540357	0.999557	Increase	nonDE	0.206607	1.82147	0.0732013	0.830809	Increase	nonDE	0.351549	3.04224	0.00340078	0.0889096	Increase
357	ENSMUSG00000002416	6	39569508	39580316	Ndufb2	Ndufb2	NADH:ubiquinone oxidoreductase subunit B2 [Source:MGI Symbol;Acc:MGI:1915448]	10808	-0.380709	-2.30529	0.024397	0.914925	Decrease	nonDE	0.311582	1.81458	0.0742661	0.857116	Increase	nonDE	-0.479642	-2.81911	0.00639853	0.455927	Decrease	nonDE	0.410515	2.30736	0.024274	0.659766	Increase	nonDE	-0.139541	-0.861118	0.392382	0.999557	Decrease	nonDE	-0.14771	-0.8883	0.3777	0.962347	Decrease	nonDE	-0.694066	-4.20653	8.2185e-05	0.0259597	Decrease
358	ENSMUSG00000002428	3	20111975	20172654	Hltf	Hltf	helicase-like transcription factor [Source:MGI Symbol;Acc:MGI:1196437]	60679	0.113949	0.79257	0.430951	0.954866	Increase	nonDE	-0.21068	-1.41631	0.161525	0.868326	Decrease	nonDE	0.229795	1.49875	0.138847	0.653032	Increase	nonDE	-0.326527	-2.05087	0.044371	0.659766	Decrease	nonDE	-0.371961	-2.70036	0.00884849	0.999557	Decrease	nonDE	-0.170367	-1.23331	0.221962	0.921066	Decrease	nonDE	-0.290556	-1.94913	0.055657	0.269838	Decrease
359	ENSMUSG00000002455	2	181233661	181297453	Prpf6	Prpf6	pre-mRNA splicing factor 6 [Source:MGI Symbol;Acc:MGI:1922946]	63792	-0.037026	-0.214011	0.831217	0.98991	Decrease	nonDE	-0.118354	-0.665392	0.508186	0.936291	Decrease	nonDE	0.103538	0.566008	0.573364	0.870653	Increase	nonDE	-0.258917	-1.37002	0.17546	0.696674	Decrease	nonDE	-0.0105514	-0.0682735	0.94578	0.999557	Decrease	nonDE	0.0374594	0.228826	0.819732	0.994954	Increase	nonDE	0.233361	1.3692	0.175713	0.453743	Increase
360	ENSMUSG00000002458	2	181330212	181335770	Rgs19	Rgs19	regulator of G-protein signaling 19 [Source:MGI Symbol;Acc:MGI:1915153]	5558	-1.10564	-2.1534	0.0350541	0.914925	Decrease	nonDE	0.780104	1.48534	0.142354	0.866234	Increase	nonDE	-0.448158	-0.802384	0.425295	0.81068	Decrease	nonDE	0.122622	0.213744	0.831425	0.956455	Increase	nonDE	-0.570277	-1.10724	0.272326	0.999557	Decrease	nonDE	0.312553	0.587656	0.558827	0.983222	Increase	nonDE	-0.296007	-0.528416	0.599035	0.805025	Decrease
361	ENSMUSG00000002459	1	4979799	5140508	Rgs20	Rgs20	regulator of G-protein signaling 20 [Source:MGI Symbol;Acc:MGI:1929866]	160709	0.546278	1.47416	0.14533	0.914925	Increase	nonDE	-0.557386	-1.44213	0.154133	0.868326	Decrease	nonDE	-0.115555	-0.324752	0.746426	0.935208	Decrease	nonDE	0.104447	0.278175	0.781773	0.942852	Increase	nonDE	0.105499	0.326174	0.745355	0.999557	Increase	nonDE	0.0775939	0.216129	0.829574	0.995243	Increase	nonDE	-0.256147	-0.759147	0.450547	0.705491	Decrease
362	ENSMUSG00000002475	18	10642092	10706771	Abhd3	Abhd3	abhydrolase domain containing 3 [Source:MGI Symbol;Acc:MGI:2147183]	64679	-0.240429	-0.512843	0.609823	0.974472	Decrease	nonDE	0.353152	0.714893	0.47727	0.930733	Increase	nonDE	-0.882848	-1.92232	0.0590104	0.568511	Decrease	nonDE	0.995571	2.03637	0.045848	0.659766	Increase	nonDE	0.203071	0.410063	0.683127	0.999557	Increase	nonDE	-0.0666361	-0.126812	0.899486	0.997348	Decrease	nonDE	-0.732904	-1.47956	0.143887	0.415076	Decrease
363	ENSMUSG00000002477	18	10617775	10642079	Snrpd1	Snrpd1	small nuclear ribonucleoprotein D1 [Source:MGI Symbol;Acc:MGI:98344]	24304	-0.276569	-1.0908	0.279441	0.920945	Decrease	nonDE	0.207021	0.782075	0.437049	0.928877	Increase	nonDE	-0.0229093	-0.0843802	0.933017	0.984395	Decrease	nonDE	-0.0466393	-0.164168	0.870115	0.966044	Decrease	nonDE	-0.29433	-1.19037	0.238288	0.999557	Decrease	nonDE	-0.496723	-2.04148	0.0453223	0.781166	Decrease	nonDE	-0.869466	-3.46505	0.000950622	0.054585	Decrease
364	ENSMUSG00000002486	5	114845821	114860388	Tchp	Tchp	trichoplein, keratin filament binding [Source:MGI Symbol;Acc:MGI:1925082]	14567	0.154202	0.828503	0.410459	0.950711	Increase	nonDE	-0.274431	-1.43759	0.155414	0.868326	Decrease	nonDE	0.369222	1.76556	0.0822304	0.59326	Increase	nonDE	-0.489452	-2.2773	0.0261128	0.659766	Decrease	nonDE	0.216976	1.34475	0.183442	0.999557	Increase	nonDE	0.00449306	0.0256121	0.979646	0.999888	Increase	nonDE	0.263068	1.45645	0.150148	0.423127	Increase
365	ENSMUSG00000002489	16	89583999	89940657	Tiam1	Tiam1	T cell lymphoma invasion and metastasis 1 [Source:MGI Symbol;Acc:MGI:103306]	356658	0.0951798	0.811317	0.420185	0.952553	Increase	nonDE	0.163439	1.31237	0.194072	0.882339	Increase	nonDE	0.338545	2.70788	0.0086711	0.455927	Increase	nonDE	-0.0799263	-0.601797	0.549431	0.862736	Decrease	nonDE	0.080829	0.751417	0.455151	0.999557	Increase	nonDE	0.250783	2.15894	0.0346034	0.764654	Increase	nonDE	0.190458	1.64407	0.105057	0.358403	Increase
366	ENSMUSG00000002496	17	24814790	24851604	Tsc2	Tsc2	TSC complex subunit 2 [Source:MGI Symbol;Acc:MGI:102548]	36814	0.0881839	0.362	0.718542	0.986361	Increase	nonDE	-0.318579	-1.29565	0.199741	0.883214	Decrease	nonDE	0.0764694	0.303208	0.762713	0.940763	Increase	nonDE	-0.306864	-1.19662	0.235861	0.722852	Decrease	nonDE	-0.165069	-0.792573	0.43095	0.999557	Decrease	nonDE	-0.157456	-0.733733	0.465786	0.975671	Decrease	nonDE	0.0204196	0.0852433	0.932334	0.97385	Increase
367	ENSMUSG00000002504	17	24858260	24869301	Slc9a3r2	Slc9a3r2	solute carrier family 9 (sodium/hydrogen exchanger), member 3 regulator 2 [Source:MGI Symbol;Acc:MGI:1890662]	11041	0.463003	2.15109	0.0352428	0.914925	Increase	nonDE	-0.518204	-2.33142	0.0228861	0.857116	Decrease	nonDE	0.171122	0.790717	0.432024	0.814327	Increase	nonDE	-0.226322	-1.00499	0.318677	0.761854	Decrease	nonDE	-0.0541411	-0.310951	0.756846	0.999557	Decrease	nonDE	-0.0882491	-0.48499	0.629336	0.98827	Decrease	nonDE	0.0906236	0.471348	0.638992	0.828804	Increase
368	ENSMUSG00000002524	15	75942031	75952773	Puf60	Puf60	poly-U binding splicing factor 60 [Source:MGI Symbol;Acc:MGI:1915209]	10742	-0.0519515	-0.406209	0.685941	0.981864	Decrease	nonDE	-0.00386439	-0.0291444	0.97684	0.998082	Decrease	nonDE	0.0792149	0.587379	0.559012	0.867975	Increase	nonDE	-0.135031	-0.961702	0.339812	0.77079	Decrease	nonDE	-0.00183476	-0.0152821	0.987855	0.999557	Decrease	nonDE	-0.134242	-1.07664	0.285677	0.942422	Decrease	nonDE	-0.0887408	-0.699036	0.487057	0.73125	Decrease
369	ENSMUSG00000002546	2	32177396	32197933	Golga2	Golga2	golgi autoantigen, golgin subfamily a, 2 [Source:MGI Symbol;Acc:MGI:2139395]	20537	-0.0268262	-0.18687	0.852352	0.991834	Decrease	nonDE	-0.113959	-0.7712	0.443421	0.929096	Decrease	nonDE	0.15474	1.01403	0.314381	0.762576	Increase	nonDE	-0.295525	-1.87302	0.0656247	0.659766	Decrease	nonDE	-0.000312821	-0.00234946	0.998133	0.99963	Decrease	nonDE	0.0363309	0.258552	0.796809	0.993766	Increase	nonDE	0.0912008	0.635672	0.527252	0.758386	Increase
370	ENSMUSG00000002550	2	32145014	32150171	Uck1	Uck1	uridine-cytidine kinase 1 [Source:MGI Symbol;Acc:MGI:98904]	5157	-0.0579134	-0.313709	0.754761	0.986466	Decrease	nonDE	-0.176824	-0.945726	0.347839	0.913265	Decrease	nonDE	0.0693454	0.351419	0.726427	0.92723	Increase	nonDE	-0.304083	-1.51218	0.1354	0.679178	Decrease	nonDE	-0.101634	-0.635019	0.527675	0.999557	Decrease	nonDE	0.1237	0.718426	0.475105	0.975671	Increase	nonDE	0.0226302	0.126065	0.900075	0.959731	Increase
371	ENSMUSG00000002578	10	128466712	128505227	Ikzf4	Ikzf4	IKAROS family zinc finger 4 [Source:MGI Symbol;Acc:MGI:1343139]	38515	0.181131	0.853618	0.396495	0.947068	Increase	nonDE	0.253066	1.07669	0.285655	0.903648	Increase	nonDE	0.765591	3.0146	0.00368361	0.430429	Increase	nonDE	-0.331394	-1.20452	0.232818	0.7211	Decrease	nonDE	0.00539943	0.0282165	0.977577	0.999557	Increase	nonDE	0.128087	0.615609	0.540332	0.981068	Increase	nonDE	0.182658	0.847836	0.399683	0.6695	Increase
372	ENSMUSG00000002580	11	98328534	98329817	Mien1	Mien1	migration and invasion enhancer 1 [Source:MGI Symbol;Acc:MGI:1913678]	1283	-0.126011	-0.953086	0.344126	0.939844	Decrease	nonDE	-0.0274708	-0.201626	0.840847	0.984929	Decrease	nonDE	-0.105751	-0.766057	0.446453	0.819731	Decrease	nonDE	-0.0477314	-0.333716	0.739683	0.928881	Decrease	nonDE	-0.20612	-1.64578	0.104702	0.999557	Decrease	nonDE	-0.114311	-0.890257	0.376656	0.962347	Decrease	nonDE	-0.297726	-2.24635	0.0281335	0.20168	Decrease
373	ENSMUSG00000002602	7	25456698	25488130	Axl	Axl	AXL receptor tyrosine kinase [Source:MGI Symbol;Acc:MGI:1347244]	31432	0.241161	1.227	0.224308	0.9164	Increase	nonDE	-0.195158	-0.953041	0.344148	0.913262	Decrease	nonDE	0.426002	1.95052	0.0554883	0.562887	Increase	nonDE	-0.379999	-1.67055	0.0996846	0.669697	Decrease	nonDE	-0.0401668	-0.24034	0.810833	0.999557	Decrease	nonDE	0.0483418	0.270943	0.787305	0.992561	Increase	nonDE	0.209144	1.07883	0.284706	0.567805	Increase
374	ENSMUSG00000002603	7	25386427	25404502	Tgfb1	Tgfb1	transforming growth factor, beta 1 [Source:MGI Symbol;Acc:MGI:98725]	18075	0.422676	0.678365	0.499981	0.961642	Increase	nonDE	-0.423446	-0.655475	0.514507	0.937012	Decrease	nonDE	-0.892512	-1.48872	0.141464	0.653592	Decrease	nonDE	0.891743	1.41862	0.160852	0.691486	Increase	nonDE	0.228455	0.382912	0.703052	0.999557	Increase	nonDE	-0.613661	-1.01386	0.314461	0.947522	Decrease	nonDE	-0.652454	-1.10701	0.272426	0.556779	Decrease
375	ENSMUSG00000002608	7	25410531	25418513	Ccdc97	Ccdc97	coiled-coil domain containing 97 [Source:MGI Symbol;Acc:MGI:1196455]	7982	-0.0349169	-0.233519	0.816102	0.989901	Decrease	nonDE	-0.0948877	-0.615142	0.540638	0.939559	Decrease	nonDE	0.0744721	0.469359	0.640405	0.896362	Increase	nonDE	-0.204277	-1.24263	0.218529	0.716361	Decrease	nonDE	-0.303921	-2.20214	0.0312584	0.999557	Decrease	nonDE	0.054354	0.381756	0.703905	0.992561	Increase	nonDE	0.0562924	0.361246	0.719103	0.874379	Increase
376	ENSMUSG00000002617	17	23392843	23412226	Zfp40	Zfp40	zinc finger protein 40 [Source:MGI Symbol;Acc:MGI:99185]	19383	0.338264	1.12166	0.26619	0.919545	Increase	nonDE	-0.370805	-1.1853	0.240271	0.893275	Decrease	nonDE	0.2402	0.776729	0.440175	0.816788	Increase	nonDE	-0.272742	-0.845058	0.401221	0.802142	Decrease	nonDE	-0.0292352	-0.118025	0.906417	0.999557	Decrease	nonDE	0.00203266	0.00773278	0.993854	0.999888	Increase	nonDE	0.251249	0.887088	0.378347	0.653484	Increase
377	ENSMUSG00000002625	17	32540398	32569581	Akap8l	Akap8l	A kinase (PRKA) anchor protein 8-like [Source:MGI Symbol;Acc:MGI:1860606]	29183	-0.0213735	-0.119304	0.905408	0.994099	Decrease	nonDE	-0.236128	-1.29434	0.200192	0.883214	Decrease	nonDE	-0.0784217	-0.421374	0.674891	0.912019	Decrease	nonDE	-0.17908	-0.938676	0.35142	0.776284	Decrease	nonDE	-0.27495	-1.71718	0.090773	0.999557	Decrease	nonDE	0.0561256	0.337615	0.736756	0.992561	Increase	nonDE	0.0425674	0.238796	0.812025	0.921543	Increase
378	ENSMUSG00000002633	5	28661813	28672254	Shh	Shh	sonic hedgehog [Source:MGI Symbol;Acc:MGI:98297]	10441	0.256952	0.694413	0.489932	0.959991	Increase	nonDE	-0.0645847	-0.161417	0.872272	0.986868	Decrease	nonDE	0.764208	1.82893	0.0720609	0.581864	Increase	nonDE	-0.57184	-1.27698	0.206214	0.709972	Decrease	nonDE	0.15414	0.390671	0.697335	0.999557	Increase	nonDE	-0.193911	-0.468448	0.641053	0.98961	Decrease	nonDE	0.305799	0.70237	0.484991	0.729292	Increase
379	ENSMUSG00000002635	7	33883924	33896086	Pdcd2l	Pdcd2l	programmed cell death 2-like [Source:MGI Symbol;Acc:MGI:1915329]	12162	-0.263654	-0.688044	0.493907	0.960724	Decrease	nonDE	0.179921	0.454141	0.651261	0.960901	Increase	nonDE	-0.185071	-0.459295	0.647576	0.899657	Decrease	nonDE	0.101338	0.242115	0.809464	0.951901	Increase	nonDE	-0.117953	-0.310286	0.757349	0.999557	Decrease	nonDE	0.325066	0.777516	0.439714	0.974252	Increase	nonDE	-0.471031	-1.16684	0.247597	0.531706	Decrease
380	ENSMUSG00000002658	17	57310405	57318288	Gtf2f1	Gtf2f1	general transcription factor IIF, polypeptide 1 [Source:MGI Symbol;Acc:MGI:1923848]	7883	0.0163472	0.0729948	0.942037	0.995429	Increase	nonDE	-0.0147215	-0.0628011	0.95012	0.99507	Decrease	nonDE	0.17811	0.729861	0.468133	0.829698	Increase	nonDE	-0.176484	-0.690613	0.492301	0.840283	Decrease	nonDE	-0.0010886	-0.0060169	0.995218	0.999557	Decrease	nonDE	-0.0854195	-0.449933	0.654276	0.98961	Decrease	nonDE	0.394003	1.8648	0.0667876	0.291625	Increase
381	ENSMUSG00000002660	17	57297305	57303188	Clpp	Clpp	caseinolytic mitochondrial matrix peptidase proteolytic subunit [Source:MGI Symbol;Acc:MGI:1858213]	5883	-0.0768664	-0.493204	0.623553	0.974913	Decrease	nonDE	0.0709387	0.434048	0.665711	0.962115	Increase	nonDE	0.107734	0.634318	0.52813	0.854511	Increase	nonDE	-0.113662	-0.63805	0.525713	0.855203	Decrease	nonDE	0.0667756	0.451951	0.652829	0.999557	Increase	nonDE	-0.131959	-0.850116	0.398424	0.962487	Decrease	nonDE	0.00170847	0.0106349	0.991548	0.997068	Increase
382	ENSMUSG00000002661	17	57304339	57306322	Alkbh7	Alkbh7	alkB homolog 7 [Source:MGI Symbol;Acc:MGI:1913650]	1983	-0.327163	-1.73576	0.0874091	0.914925	Decrease	nonDE	0.218065	1.1134	0.269692	0.899364	Increase	nonDE	-0.295457	-1.49229	0.140526	0.653592	Decrease	nonDE	0.186358	0.901971	0.370448	0.789079	Increase	nonDE	0.126602	0.675909	0.501529	0.999557	Increase	nonDE	-0.287835	-1.48283	0.143018	0.885237	Decrease	nonDE	-0.434967	-2.27523	0.0262436	0.195391	Decrease
383	ENSMUSG00000002679	12	81620331	81641782	Med6	Med6	mediator complex subunit 6 [Source:MGI Symbol;Acc:MGI:1917042]	21451	0.373916	1.11536	0.268858	0.919545	Increase	nonDE	-0.113635	-0.310754	0.756996	0.975953	Decrease	nonDE	0.0492958	0.148696	0.88226	0.970602	Increase	nonDE	0.210986	0.577947	0.565324	0.86786	Increase	nonDE	0.289508	0.959154	0.341084	0.999557	Increase	nonDE	-0.31878	-0.989911	0.325939	0.949905	Decrease	nonDE	-0.289092	-0.960241	0.340541	0.620096	Decrease
384	ENSMUSG00000002688	12	50388014	50695881	Prkd1	Prkd1	protein kinase D1 [Source:MGI Symbol;Acc:MGI:99879]	307867	0.23167	0.598552	0.55158	0.967174	Increase	nonDE	0.500501	1.13103	0.262256	0.898505	Increase	nonDE	0.212057	0.515884	0.60771	0.885253	Increase	nonDE	0.520114	1.1139	0.269479	0.743459	Increase	nonDE	0.132676	0.344099	0.731898	0.999557	Increase	nonDE	0.15969	0.377421	0.707107	0.992561	Increase	nonDE	0.716902	1.58849	0.117096	0.376295	Increase
385	ENSMUSG00000002699	11	33996920	34042295	Lcp2	Lcp2	lymphocyte cytosolic protein 2 [Source:MGI Symbol;Acc:MGI:1321402]	45375	-0.547301	-1.03576	0.304204	0.924765	Decrease	nonDE	0.537603	0.981256	0.330155	0.90818	Increase	nonDE	-0.449536	-0.818188	0.41628	0.806077	Decrease	nonDE	0.439837	0.768077	0.445261	0.821249	Increase	nonDE	0.686022	1.26353	0.210973	0.999557	Increase	nonDE	-0.883813	-1.5833	0.118274	0.866124	Decrease	nonDE	-0.151389	-0.275319	0.783956	0.908605	Decrease
386	ENSMUSG00000002718	2	166747960	166788309	Cse1l	Cse1l	chromosome segregation 1-like (S. cerevisiae) [Source:MGI Symbol;Acc:MGI:1339951]	40349	-0.188256	-1.25257	0.21491	0.914925	Decrease	nonDE	0.254085	1.60485	0.113441	0.866234	Increase	nonDE	-0.146351	-0.929525	0.356103	0.781306	Decrease	nonDE	0.21218	1.27513	0.206864	0.709992	Increase	nonDE	0.0637391	0.452024	0.652777	0.999557	Increase	nonDE	0.0565941	0.374629	0.709173	0.992561	Increase	nonDE	-0.0577011	-0.382048	0.703689	0.866773	Decrease
387	ENSMUSG00000002728	2	145744019	145758345	Naa20	Naa20	N(alpha)-acetyltransferase 20, NatB catalytic subunit [Source:MGI Symbol;Acc:MGI:1915127]	14326	-0.176953	-1.00417	0.319073	0.930434	Decrease	nonDE	0.0366436	0.201534	0.840919	0.984929	Increase	nonDE	0.0849071	0.441843	0.66009	0.905297	Increase	nonDE	-0.225217	-1.13286	0.26149	0.738956	Decrease	nonDE	-0.161289	-0.980934	0.330312	0.999557	Decrease	nonDE	-0.0707244	-0.4152	0.679381	0.990911	Decrease	nonDE	-0.282903	-1.62779	0.108475	0.363116	Decrease
388	ENSMUSG00000002731	2	76460242	76478359	Prkra	Prkra	protein kinase, interferon inducible double stranded RNA dependent activator [Source:MGI Symbol;Acc:MGI:1344375]	18117	0.0374397	0.200199	0.841959	0.990425	Increase	nonDE	0.145796	0.725298	0.470908	0.930733	Increase	nonDE	0.255713	1.24932	0.21609	0.698285	Increase	nonDE	-0.0724767	-0.33075	0.741912	0.929964	Decrease	nonDE	0.009095	0.0514419	0.959133	0.999557	Increase	nonDE	-0.149836	-0.812683	0.419407	0.967487	Decrease	nonDE	-0.239016	-1.28564	0.203193	0.486006	Decrease
389	ENSMUSG00000002732	2	76493388	76503460	Fkbp7	Fkbp7	FK506 binding protein 7 [Source:MGI Symbol;Acc:MGI:1336879]	10072	0.0812534	0.249168	0.804027	0.989129	Increase	nonDE	-0.0593325	-0.172762	0.863382	0.986348	Decrease	nonDE	0.764082	1.95876	0.0544925	0.561567	Increase	nonDE	-0.742161	-1.82174	0.0731597	0.659766	Decrease	nonDE	-0.232526	-0.843146	0.402281	0.999557	Decrease	nonDE	0.160657	0.546242	0.586795	0.983222	Increase	nonDE	-0.167953	-0.554335	0.581278	0.793419	Decrease
390	ENSMUSG00000002733	2	76505625	76527172	Plekha3	Plekha3	pleckstrin homology domain-containing, family A (phosphoinositide binding specific) member 3 [Source:MGI Symbol;Acc:MGI:1932515]	21547	0.064657	0.536867	0.593217	0.973503	Increase	nonDE	0.0477498	0.377766	0.706852	0.967502	Increase	nonDE	-0.0192891	-0.154772	0.877487	0.970134	Decrease	nonDE	0.131696	1.0021	0.320064	0.762264	Increase	nonDE	0.112283	1.01078	0.315922	0.999557	Increase	nonDE	0.0339396	0.287106	0.774957	0.992561	Increase	nonDE	0.2164	1.78787	0.0785224	0.313778	Increase
391	ENSMUSG00000002741	11	5905693	5917780	Ykt6	Ykt6	YKT6 v-SNARE homolog (S. cerevisiae) [Source:MGI Symbol;Acc:MGI:1927550]	12087	0.0337723	0.292419	0.77091	0.986803	Increase	nonDE	-0.0454094	-0.377556	0.707007	0.967503	Decrease	nonDE	0.0528054	0.4354	0.664734	0.907002	Increase	nonDE	-0.0644425	-0.508164	0.613082	0.886816	Decrease	nonDE	-0.153264	-1.44249	0.154033	0.999557	Decrease	nonDE	0.0918255	0.82323	0.413429	0.965421	Increase	nonDE	-0.117095	-1.02237	0.31045	0.59304	Decrease
392	ENSMUSG00000002748	5	135216118	135274983	Baz1b	Baz1b	bromodomain adjacent to zinc finger domain, 1B [Source:MGI Symbol;Acc:MGI:1353499]	58865	0.0664305	0.542095	0.589632	0.973503	Increase	nonDE	0.0116662	0.0908989	0.927856	0.992708	Increase	nonDE	0.267782	2.05759	0.0437003	0.546147	Increase	nonDE	-0.189685	-1.3881	0.169912	0.694037	Decrease	nonDE	0.0313325	0.271557	0.786835	0.999557	Increase	nonDE	-0.0893646	-0.739839	0.462098	0.975671	Decrease	nonDE	0.136878	1.10152	0.274788	0.558801	Increase
393	ENSMUSG00000002763	17	47022389	47036467	Pex6	Pex6	peroxisomal biogenesis factor 6 [Source:MGI Symbol;Acc:MGI:2385054]	14078	-0.252604	-1.17529	0.244225	0.919545	Decrease	nonDE	0.0606037	0.278001	0.781906	0.978439	Increase	nonDE	-0.229091	-1.00557	0.318402	0.765662	Decrease	nonDE	0.0370905	0.159506	0.873772	0.96633	Increase	nonDE	0.0649151	0.338109	0.736385	0.999557	Increase	nonDE	-0.104601	-0.50951	0.612144	0.985696	Decrease	nonDE	0.299196	1.31182	0.19426	0.475132	Increase
394	ENSMUSG00000002767	17	46957155	46961065	Mrpl2	Mrpl2	mitochondrial ribosomal protein L2 [Source:MGI Symbol;Acc:MGI:1351622]	3910	-0.310435	-1.42809	0.15812	0.914925	Decrease	nonDE	0.232145	1.02087	0.311152	0.907555	Increase	nonDE	-0.321319	-1.4167	0.16141	0.670364	Decrease	nonDE	0.24303	1.01998	0.311569	0.758259	Increase	nonDE	0.12531	0.564548	0.574351	0.999557	Increase	nonDE	-0.165194	-0.70594	0.482782	0.975723	Decrease	nonDE	-0.378119	-1.63877	0.106159	0.360062	Decrease
395	ENSMUSG00000002768	17	46989719	46994037	Mea1	Mea1	male enhanced antigen 1 [Source:MGI Symbol;Acc:MGI:96957]	4318	0.0226403	0.0669501	0.94683	0.995429	Increase	nonDE	-0.503208	-1.50274	0.137815	0.866234	Decrease	nonDE	-0.250446	-0.73311	0.466163	0.829124	Decrease	nonDE	-0.230122	-0.674464	0.502441	0.8451	Decrease	nonDE	-0.496189	-1.65207	0.10341	0.999557	Decrease	nonDE	-0.22407	-0.780409	0.438022	0.974252	Decrease	nonDE	-0.724585	-2.28938	0.0253591	0.192032	Decrease
396	ENSMUSG00000002769	17	47036590	47040094	Gnmt	Gnmt	glycine N-methyltransferase [Source:MGI Symbol;Acc:MGI:1202304]	3504	-0.0080218	-0.0229509	0.981761	0.996967	Decrease	nonDE	-0.173668	-0.484544	0.629651	0.959124	Decrease	nonDE	0.0150929	0.0413569	0.96714	0.993627	Increase	nonDE	-0.196783	-0.522794	0.60292	0.882965	Decrease	nonDE	0.289247	0.990609	0.3256	0.999557	Increase	nonDE	-0.104229	-0.327207	0.744577	0.992561	Decrease	nonDE	0.234877	0.732781	0.466362	0.716971	Increase
397	ENSMUSG00000002771	7	45481307	45527802	Grin2d	Grin2d	glutamate receptor, ionotropic, NMDA2D (epsilon 4) [Source:MGI Symbol;Acc:MGI:95823]	46495	0.367757	0.857276	0.394485	0.946738	Increase	nonDE	-0.124397	-0.273762	0.785148	0.979358	Decrease	nonDE	-0.0442874	-0.103194	0.918131	0.980089	Decrease	nonDE	0.287647	0.627785	0.532374	0.857129	Increase	nonDE	0.199229	0.519051	0.605512	0.999557	Increase	nonDE	-0.631463	-1.64303	0.105273	0.853349	Decrease	nonDE	0.472988	1.1146	0.269181	0.553566	Increase
398	ENSMUSG00000002778	7	45522196	45533156	Kdelr1	Kdelr1	KDEL (Lys-Asp-Glu-Leu) endoplasmic reticulum protein retention receptor 1 [Source:MGI Symbol;Acc:MGI:1915387]	10960	0.0152881	0.127486	0.898955	0.994099	Increase	nonDE	-0.0774409	-0.623638	0.535078	0.938043	Decrease	nonDE	-0.107295	-0.868044	0.388607	0.794969	Decrease	nonDE	0.0451423	0.350613	0.727028	0.925169	Increase	nonDE	-0.0314878	-0.27503	0.784177	0.999557	Decrease	nonDE	-0.307946	-2.63176	0.0106286	0.721732	Decrease	nonDE	-0.169691	-1.39988	0.166369	0.443884	Decrease
399	ENSMUSG00000002781	7	45546365	45566837	Tmem143	Tmem143	transmembrane protein 143 [Source:MGI Symbol;Acc:MGI:1917459]	20472	0.138299	0.494254	0.622816	0.974913	Increase	nonDE	-0.0863202	-0.294002	0.769706	0.976695	Decrease	nonDE	-0.0469032	-0.160431	0.873046	0.969484	Decrease	nonDE	0.0988821	0.321112	0.74917	0.933061	Increase	nonDE	0.00681825	0.0268251	0.978683	0.999557	Increase	nonDE	-0.0927462	-0.344998	0.731225	0.992561	Decrease	nonDE	0.145611	0.513241	0.609547	0.810506	Increase
400	ENSMUSG00000002791	17	32295057	32326324	Pdxk-ps	Pdxk-ps	pyridoxal (pyridoxine, vitamin B6) kinase, pseudogene [Source:MGI Symbol;Acc:MGI:1933201]	31267	-0.056312	-0.107339	0.91489	0.994099	Decrease	nonDE	0.783703	1.4274	0.158817	0.868326	Increase	nonDE	-0.443716	-0.827015	0.411611	0.803491	Decrease	nonDE	1.17111	2.07322	0.0425944	0.659766	Increase	nonDE	-0.126048	-0.238175	0.812583	0.999557	Decrease	nonDE	0.225451	0.411343	0.682334	0.991008	Increase	nonDE	-0.597375	-1.09991	0.275908	0.560077	Decrease
401	ENSMUSG00000002797	6	54959565	54969935	Ggct	Ggct	gamma-glutamyl cyclotransferase [Source:MGI Symbol;Acc:MGI:95700]	10370	0.124561	0.642439	0.522879	0.962951	Increase	nonDE	-0.308866	-1.56091	0.123466	0.866234	Decrease	nonDE	0.213404	1.02789	0.307863	0.757975	Increase	nonDE	-0.39771	-1.86751	0.0664025	0.659766	Decrease	nonDE	-0.169365	-0.936138	0.352715	0.999557	Decrease	nonDE	-0.352817	-1.96106	0.0542183	0.795049	Decrease	nonDE	-0.0824463	-0.417337	0.677826	0.852144	Decrease
402	ENSMUSG00000002799	12	112871439	112893396	Jag2	Jag2	jagged 2 [Source:MGI Symbol;Acc:MGI:1098270]	21957	-0.213338	-0.434287	0.665538	0.978404	Decrease	nonDE	0.109026	0.215657	0.82994	0.984149	Increase	nonDE	-0.29867	-0.586237	0.559774	0.868339	Decrease	nonDE	0.194358	0.36849	0.713721	0.921326	Increase	nonDE	0.224837	0.544249	0.588158	0.999557	Increase	nonDE	-0.159124	-0.356936	0.722311	0.992561	Decrease	nonDE	1.00034	2.07034	0.0424527	0.240227	Increase
403	ENSMUSG00000002803	12	112940102	112942565	Btbd6	Btbd6	BTB (POZ) domain containing 6 [Source:MGI Symbol;Acc:MGI:3026623]	2463	0.299042	1.11197	0.270302	0.920127	Increase	nonDE	0.074288	0.252059	0.801802	0.980463	Increase	nonDE	-0.0745491	-0.279753	0.780567	0.947096	Decrease	nonDE	0.447879	1.51953	0.133546	0.679097	Increase	nonDE	-0.0912744	-0.384283	0.70204	0.999557	Decrease	nonDE	0.582967	2.10213	0.0394749	0.781166	Increase	nonDE	-0.267887	-1.05521	0.29529	0.579286	Decrease
404	ENSMUSG00000002804	12	112897911	112905744	Nudt14	Nudt14	nudix (nucleoside diphosphate linked moiety X)-type motif 14 [Source:MGI Symbol;Acc:MGI:1913424]	7833	0.23282	0.913642	0.364328	0.943914	Increase	nonDE	0.101823	0.359533	0.720378	0.970069	Increase	nonDE	0.0338241	0.132181	0.895255	0.974806	Increase	nonDE	0.300819	1.05069	0.297345	0.752803	Increase	nonDE	-0.156165	-0.674936	0.502143	0.999557	Decrease	nonDE	-0.0236096	-0.0974221	0.922695	0.999888	Decrease	nonDE	-0.282821	-1.15205	0.253577	0.538237	Decrease
405	ENSMUSG00000002808	13	19775876	19804097	Epdr1	Epdr1	ependymin related protein 1 (zebrafish) [Source:MGI Symbol;Acc:MGI:2145369]	28221	-0.129088	-0.687086	0.494506	0.960724	Decrease	nonDE	0.050918	0.26214	0.794054	0.979581	Increase	nonDE	-0.316317	-1.64403	0.105066	0.618319	Decrease	nonDE	0.238147	1.18948	0.238637	0.724347	Increase	nonDE	0.107828	0.583888	0.561344	0.999557	Increase	nonDE	-0.211819	-1.10311	0.274102	0.939087	Decrease	nonDE	-0.364042	-1.90927	0.0607034	0.281577	Decrease
406	ENSMUSG00000002812	11	60604949	60618089	Flii	Flii	flightless I actin binding protein [Source:MGI Symbol;Acc:MGI:1342286]	13140	0.150195	1.03604	0.304077	0.924765	Increase	nonDE	-0.192969	-1.28545	0.20326	0.883214	Decrease	nonDE	0.167027	1.09484	0.277681	0.739668	Increase	nonDE	-0.209802	-1.32221	0.190794	0.703582	Decrease	nonDE	0.0890925	0.704203	0.483856	0.999557	Increase	nonDE	-0.0741103	-0.553266	0.582005	0.983222	Decrease	nonDE	0.17856	1.27304	0.207601	0.490305	Increase
407	ENSMUSG00000002814	11	60630884	60668191	Top3a	Top3a	topoisomerase (DNA) III alpha [Source:MGI Symbol;Acc:MGI:1197527]	37307	-0.36841	-0.774076	0.441731	0.955557	Decrease	nonDE	0.293838	0.59752	0.552265	0.943132	Increase	nonDE	-0.822213	-1.71878	0.0904791	0.606424	Decrease	nonDE	0.747641	1.50084	0.138306	0.680875	Increase	nonDE	0.0737439	0.162273	0.871601	0.999557	Increase	nonDE	-0.057054	-0.119676	0.905114	0.997725	Decrease	nonDE	-0.366481	-0.7849	0.435402	0.695788	Decrease
408	ENSMUSG00000002820	9	21176589	21189068	Atg4d	Atg4d	autophagy related 4D, cysteine peptidase [Source:MGI Symbol;Acc:MGI:2444308]	12479	-0.168974	-0.819592	0.415485	0.951609	Decrease	nonDE	0.16639	0.766379	0.446263	0.929096	Increase	nonDE	-0.0140775	-0.0636942	0.949412	0.988368	Decrease	nonDE	0.0114942	0.0493313	0.960809	0.992426	Increase	nonDE	0.103736	0.534583	0.594787	0.999557	Increase	nonDE	-0.160857	-0.786148	0.434677	0.973027	Decrease	nonDE	0.0548287	0.260916	0.794994	0.913426	Increase
409	ENSMUSG00000002825	9	21323133	21331570	Qtrt1	Qtrt1	queuine tRNA-ribosyltransferase catalytic subunit 1 [Source:MGI Symbol;Acc:MGI:1931441]	8437	0.0975656	0.269043	0.78876	0.986922	Increase	nonDE	0.128368	0.323527	0.747349	0.97537	Increase	nonDE	-0.391554	-1.09282	0.278563	0.74006	Decrease	nonDE	0.617488	1.55984	0.12372	0.674283	Increase	nonDE	0.717254	1.97214	0.0529105	0.999557	Increase	nonDE	-0.334496	-0.831556	0.408746	0.965421	Decrease	nonDE	-0.504444	-1.5433	0.12768	0.392795	Decrease
410	ENSMUSG00000002831	17	56407591	56416803	Plin4	Plin4	perilipin 4 [Source:MGI Symbol;Acc:MGI:1929709]	9212	0.0701624	0.122943	0.902537	0.994099	Increase	nonDE	-0.0511108	-0.0863944	0.931422	0.993112	Decrease	nonDE	-0.28769	-0.495254	0.622114	0.889773	Decrease	nonDE	0.306742	0.505941	0.614633	0.887577	Increase	nonDE	0.287366	0.539278	0.591563	0.999557	Increase	nonDE	-0.355978	-0.636676	0.526602	0.979776	Decrease	nonDE	0.528171	0.923965	0.358969	0.63666	Increase
411	ENSMUSG00000002833	17	56386634	56407607	Hdgfl2	Hdgfl2	HDGF like 2 [Source:MGI Symbol;Acc:MGI:1194492]	20973	0.0276177	0.18297	0.855399	0.992636	Increase	nonDE	-0.077979	-0.498816	0.619616	0.957999	Decrease	nonDE	0.282411	1.70863	0.092357	0.607803	Increase	nonDE	-0.332773	-1.94052	0.0567164	0.659766	Decrease	nonDE	-0.0314792	-0.223041	0.824213	0.999557	Decrease	nonDE	-0.0233017	-0.15672	0.875958	0.995883	Decrease	nonDE	0.0390448	0.254774	0.799713	0.915866	Increase
412	ENSMUSG00000002835	17	56347439	56379289	Chaf1a	Chaf1a	chromatin assembly factor 1, subunit A (p150) [Source:MGI Symbol;Acc:MGI:1351331]	31850	0.938236	1.98437	0.0514982	0.914925	Increase	nonDE	-0.94509	-1.9381	0.057017	0.857116	Decrease	nonDE	1.23774	2.47479	0.0159863	0.4643	Increase	nonDE	-1.2446	-2.40223	0.0192021	0.659766	Decrease	nonDE	0.330666	0.855329	0.395554	0.999557	Increase	nonDE	0.204154	0.466477	0.642455	0.98961	Increase	nonDE	0.653825	1.49764	0.139134	0.408139	Increase
413	ENSMUSG00000002844	16	38264392	38273065	Adprh	Adprh	ADP-ribosylarginine hydrolase [Source:MGI Symbol;Acc:MGI:1098234]	8673	0.0179682	0.163881	0.870341	0.992959	Increase	nonDE	-0.0612825	-0.539116	0.591674	0.951194	Decrease	nonDE	-0.0137986	-0.121063	0.904019	0.976282	Decrease	nonDE	-0.0295156	-0.248476	0.80456	0.950313	Decrease	nonDE	0.181175	1.73805	0.0870024	0.999557	Increase	nonDE	-0.305339	-2.82207	0.0063464	0.721732	Decrease	nonDE	0.170571	1.52042	0.13332	0.399428	Increase
414	ENSMUSG00000002845	16	38379060	38412524	Tmem39a	Tmem39a	transmembrane protein 39a [Source:MGI Symbol;Acc:MGI:1915096]	33464	0.611809	1.89319	0.0628472	0.914925	Increase	nonDE	-0.268975	-0.763273	0.4481	0.929416	Decrease	nonDE	-0.0559909	-0.182383	0.855858	0.96517	Decrease	nonDE	0.398825	1.17189	0.245577	0.726847	Increase	nonDE	0.375637	1.22656	0.224472	0.999557	Increase	nonDE	-0.696081	-2.24947	0.0279233	0.758064	Decrease	nonDE	-0.114808	-0.381086	0.704399	0.867083	Decrease
415	ENSMUSG00000002846	16	38318709	38343025	Timmdc1	Timmdc1	translocase of inner mitochondrial membrane domain containing 1 [Source:MGI Symbol;Acc:MGI:1922139]	24316	0.17616	0.74705	0.457764	0.956883	Increase	nonDE	-0.206696	-0.841025	0.403459	0.920598	Decrease	nonDE	-0.00701343	-0.0294408	0.976604	0.996415	Decrease	nonDE	-0.0235224	-0.0940659	0.92535	0.980951	Decrease	nonDE	-0.26974	-1.21391	0.229233	0.999557	Decrease	nonDE	0.163913	0.704765	0.483509	0.975723	Increase	nonDE	0.035973	0.141726	0.887741	0.955035	Increase
416	ENSMUSG00000002847	16	38216479	38253507	Pla1a	Pla1a	phospholipase A1 member A [Source:MGI Symbol;Acc:MGI:1934677]	37028	0.351784	0.680423	0.498686	0.961642	Increase	nonDE	-0.676079	-1.28169	0.204566	0.883214	Decrease	nonDE	-0.0156143	-0.0295467	0.97652	0.996415	Decrease	nonDE	-0.308681	-0.568373	0.571767	0.871037	Decrease	nonDE	0.0548008	0.111984	0.911186	0.999557	Increase	nonDE	0.329982	0.636644	0.526623	0.979776	Increase	nonDE	0.179588	0.347949	0.729018	0.878944	Increase
417	ENSMUSG00000002870	6	88860456	88875762	Mcm2	Mcm2	minichromosome maintenance complex component 2 [Source:MGI Symbol;Acc:MGI:105380]	15306	-0.00583826	-0.0180342	0.985668	0.997228	Decrease	nonDE	0.35894	1.00568	0.31835	0.907555	Increase	nonDE	0.514243	1.42481	0.159062	0.6697	Increase	nonDE	-0.161142	-0.409302	0.683682	0.913281	Decrease	nonDE	0.15358	0.461267	0.646168	0.999557	Increase	nonDE	0.147928	0.402767	0.688459	0.99144	Increase	nonDE	0.0341834	0.0958961	0.923902	0.969778	Increase
418	ENSMUSG00000002871	6	88879233	88889220	Tpra1	Tpra1	transmembrane protein, adipocyte asscociated 1 [Source:MGI Symbol;Acc:MGI:1345190]	9987	-0.244441	-0.706726	0.482297	0.959726	Decrease	nonDE	0.101429	0.284135	0.777222	0.977809	Increase	nonDE	-0.623558	-1.83634	0.0709437	0.581864	Decrease	nonDE	0.480546	1.35826	0.17914	0.697579	Increase	nonDE	0.0562907	0.179531	0.858087	0.999557	Increase	nonDE	0.217237	0.619455	0.537811	0.980869	Increase	nonDE	0.344518	0.879928	0.382184	0.656762	Increase
419	ENSMUSG00000002881	1	52496453	52539838	Nab1	Nab1	Ngfi-A binding protein 1 [Source:MGI Symbol;Acc:MGI:107564]	43385	0.00962162	0.0822679	0.93469	0.995121	Increase	nonDE	0.00465867	0.0382483	0.969609	0.997115	Increase	nonDE	0.0295101	0.241172	0.810191	0.95361	Increase	nonDE	-0.0152298	-0.118993	0.905653	0.975118	Decrease	nonDE	0.0269183	0.245423	0.806913	0.999557	Increase	nonDE	0.0164405	0.141923	0.887586	0.996385	Increase	nonDE	-0.0827604	-0.71331	0.478242	0.724523	Decrease
420	ENSMUSG00000002885	8	84449880	84467955	Adgre5	Adgre5	adhesion G protein-coupled receptor E5 [Source:MGI Symbol;Acc:MGI:1347095]	18075	-0.116189	-0.342344	0.733212	0.986466	Decrease	nonDE	0.0967028	0.270992	0.787268	0.979358	Increase	nonDE	0.238053	0.639182	0.524981	0.854511	Increase	nonDE	-0.257539	-0.658225	0.51275	0.849419	Decrease	nonDE	0.041698	0.126784	0.899508	0.999557	Increase	nonDE	-0.0361539	-0.102931	0.918339	0.99886	Decrease	nonDE	0.779898	2.01238	0.0483846	0.253679	Increase
421	ENSMUSG00000002897	6	120440208	120464520	Il17ra	Il17ra	interleukin 17 receptor A [Source:MGI Symbol;Acc:MGI:107399]	24312	-0.469024	-1.46629	0.147458	0.914925	Decrease	nonDE	0.174378	0.535091	0.594438	0.951194	Increase	nonDE	-0.156112	-0.446204	0.656953	0.904044	Decrease	nonDE	-0.138534	-0.38689	0.700118	0.917177	Decrease	nonDE	-0.0736402	-0.262802	0.793546	0.999557	Decrease	nonDE	-0.196807	-0.680069	0.498909	0.977709	Decrease	nonDE	-0.0683166	-0.225825	0.822056	0.925907	Decrease
422	ENSMUSG00000002900	12	31315233	31379643	Lamb1	Lamb1	laminin B1 [Source:MGI Symbol;Acc:MGI:96743]	64410	-0.0889121	-0.489654	0.62605	0.974913	Decrease	nonDE	0.159453	0.833784	0.407498	0.92247	Increase	nonDE	-0.0505938	-0.263265	0.793191	0.950195	Decrease	nonDE	0.121134	0.597126	0.552526	0.864013	Increase	nonDE	0.0845472	0.530653	0.597493	0.999557	Increase	nonDE	0.0820772	0.47448	0.636769	0.98925	Increase	nonDE	0.263763	1.47399	0.145377	0.41733	Increase
423	ENSMUSG00000002908	8	71294693	71315902	Kcnn1	Kcnn1	potassium intermediate/small conductance calcium-activated channel, subfamily N, member 1 [Source:MGI Symbol;Acc:MGI:1933993]	21209	0.0514714	0.137067	0.891407	0.994099	Increase	nonDE	-0.277607	-0.725126	0.471013	0.930733	Decrease	nonDE	-0.189311	-0.486304	0.628409	0.891421	Decrease	nonDE	-0.0368241	-0.0921716	0.926849	0.981428	Decrease	nonDE	-0.22216	-0.664534	0.508732	0.999557	Decrease	nonDE	0.322518	0.874073	0.38534	0.962487	Increase	nonDE	0.925875	2.20663	0.0309281	0.210868	Increase
424	ENSMUSG00000002910	8	71287773	71292364	Arrdc2	Arrdc2	arrestin domain containing 2 [Source:MGI Symbol;Acc:MGI:1918057]	4591	0.873446	1.56481	0.122549	0.914925	Increase	nonDE	-0.359334	-0.610739	0.543531	0.939883	Decrease	nonDE	0.0466724	0.0826682	0.934373	0.984602	Increase	nonDE	0.46744	0.780177	0.438157	0.818064	Increase	nonDE	-0.584189	-1.03739	0.303452	0.999557	Decrease	nonDE	0.524442	0.900252	0.371355	0.959925	Increase	nonDE	-1.43155	-2.51145	0.0145533	0.154014	Decrease
425	ENSMUSG00000002930	6	55994482	56009674	Ppp1r17	Ppp1r17	protein phosphatase 1, regulatory subunit 17 [Source:MGI Symbol;Acc:MGI:1333876]	15192	-0.301658	-1.40495	0.164863	0.914925	Decrease	nonDE	0.335352	1.48621	0.142124	0.866234	Increase	nonDE	0.0160855	0.0699845	0.944424	0.987194	Increase	nonDE	0.0176076	0.0727881	0.942201	0.985866	Increase	nonDE	-0.33064	-1.57193	0.120889	0.999557	Decrease	nonDE	-0.333236	-1.58884	0.117016	0.866124	Decrease	nonDE	-0.666325	-3.05597	0.00326794	0.088181	Decrease
426	ENSMUSG00000002944	5	17986688	18093799	Cd36	Cd36	CD36 molecule [Source:MGI Symbol;Acc:MGI:107899]	107111	-0.370422	-0.676855	0.500933	0.961736	Decrease	nonDE	0.359191	0.635006	0.527684	0.937431	Increase	nonDE	-0.734631	-1.31593	0.192884	0.686573	Decrease	nonDE	0.7234	1.24526	0.217569	0.71576	Increase	nonDE	-0.121518	-0.218645	0.827621	0.999557	Decrease	nonDE	-0.0642479	-0.111905	0.911248	0.998625	Decrease	nonDE	-0.0011986	-0.00205409	0.998367	0.999649	Decrease
427	ENSMUSG00000002948	8	4288740	4297897	Map2k7	Map2k7	mitogen-activated protein kinase kinase 7 [Source:MGI Symbol;Acc:MGI:1346871]	9157	0.120542	0.896454	0.373364	0.944702	Increase	nonDE	-0.16556	-1.18884	0.238887	0.89216	Decrease	nonDE	0.113359	0.80687	0.422724	0.809311	Increase	nonDE	-0.158376	-1.08312	0.282811	0.748755	Decrease	nonDE	0.0110377	0.0904248	0.928232	0.999557	Increase	nonDE	0.000376992	0.00293071	0.997671	0.999888	Increase	nonDE	0.504516	3.65382	0.000522134	0.0436332	Increase
428	ENSMUSG00000002949	8	4309731	4325913	Timm44	Timm44	translocase of inner mitochondrial membrane 44 [Source:MGI Symbol;Acc:MGI:1343262]	16182	-0.235445	-1.15065	0.254149	0.919545	Decrease	nonDE	0.0159931	0.0764479	0.939301	0.994663	Increase	nonDE	-0.0219146	-0.0988594	0.921558	0.981272	Decrease	nonDE	-0.197537	-0.867784	0.388749	0.799636	Decrease	nonDE	-0.21948	-1.18131	0.241841	0.999557	Decrease	nonDE	0.077289	0.391481	0.69674	0.99144	Increase	nonDE	-0.123105	-0.601187	0.549835	0.77212	Decrease
429	ENSMUSG00000002957	7	141142086	141212924	Ap2a2	Ap2a2	adaptor-related protein complex 2, alpha 2 subunit [Source:MGI Symbol;Acc:MGI:101920]	70838	0.193029	1.72991	0.0884572	0.914925	Increase	nonDE	-0.0669536	-0.571995	0.569325	0.948885	Decrease	nonDE	0.243306	2.07881	0.0416409	0.540815	Increase	nonDE	-0.117231	-0.951487	0.34493	0.772905	Decrease	nonDE	-0.0398936	-0.387984	0.699313	0.999557	Decrease	nonDE	0.08627	0.793951	0.430152	0.970452	Increase	nonDE	0.144377	1.29308	0.200622	0.483078	Increase
430	ENSMUSG00000002963	7	44506563	44512416	Pnkp	Pnkp	polynucleotide kinase 3'- phosphatase [Source:MGI Symbol;Acc:MGI:1891698]	5853	0.000673087	0.00221656	0.998238	0.999156	Increase	nonDE	-0.0698976	-0.224029	0.823447	0.983804	Decrease	nonDE	0.262996	0.803758	0.424507	0.81052	Increase	nonDE	-0.332221	-0.984338	0.328649	0.766549	Decrease	nonDE	-0.0831796	-0.289533	0.773108	0.999557	Decrease	nonDE	-0.28476	-0.979201	0.331161	0.95087	Decrease	nonDE	-0.275034	-0.899638	0.371679	0.647582	Decrease
431	ENSMUSG00000002968	7	44526189	44542136	Med25	Med25	mediator complex subunit 25 [Source:MGI Symbol;Acc:MGI:1922863]	15947	0.171648	0.933993	0.353811	0.943178	Increase	nonDE	0.087027	0.437018	0.663566	0.962115	Increase	nonDE	0.0441014	0.234939	0.815005	0.955004	Increase	nonDE	0.214574	1.05017	0.297584	0.752803	Increase	nonDE	-0.142818	-0.846294	0.400536	0.999557	Decrease	nonDE	0.0707169	0.39502	0.694139	0.99144	Increase	nonDE	0.0756412	0.392504	0.695988	0.862093	Increase
432	ENSMUSG00000002980	7	19490056	19504941	Bcam	Bcam	basal cell adhesion molecule [Source:MGI Symbol;Acc:MGI:1929940]	14885	0.742854	1.17048	0.246142	0.919545	Increase	nonDE	-0.918424	-1.40648	0.164409	0.870272	Decrease	nonDE	-0.224807	-0.355881	0.723098	0.926684	Decrease	nonDE	0.0492376	0.0751165	0.940356	0.985792	Increase	nonDE	0.52749	0.970086	0.335649	0.999557	Increase	nonDE	-0.629299	-1.11008	0.271108	0.937015	Decrease	nonDE	0.690914	1.18161	0.241725	0.526419	Increase
433	ENSMUSG00000002981	7	19365496	19398958	Clptm1	Clptm1	cleft lip and palate associated transmembrane protein 1 [Source:MGI Symbol;Acc:MGI:1927155]	33462	0.108376	0.819188	0.415714	0.951609	Increase	nonDE	-0.01871	-0.13501	0.893027	0.987977	Decrease	nonDE	0.14101	1.01344	0.314658	0.762576	Increase	nonDE	-0.0513442	-0.351086	0.726674	0.925093	Decrease	nonDE	-0.069548	-0.566833	0.572807	0.999557	Decrease	nonDE	-0.155939	-1.23155	0.222613	0.921066	Decrease	nonDE	0.014286	0.106283	0.91569	0.966054	Increase
434	ENSMUSG00000002983	7	19340142	19363363	Relb	Relb	avian reticuloendotheliosis viral (v-rel) oncogene related B [Source:MGI Symbol;Acc:MGI:103289]	23221	-0.0203651	-0.0442807	0.964818	0.995525	Decrease	nonDE	0.0633722	0.130878	0.896282	0.98888	Increase	nonDE	0.00901943	0.018668	0.985164	0.997803	Increase	nonDE	0.0339876	0.0666142	0.947096	0.987922	Increase	nonDE	0.494105	1.04795	0.298595	0.999557	Increase	nonDE	0.0742725	0.142624	0.887034	0.996157	Increase	nonDE	0.293695	0.594322	0.554388	0.775128	Increase
435	ENSMUSG00000002984	7	19435238	19449363	Tomm40	Tomm40	translocase of outer mitochondrial membrane 40 [Source:MGI Symbol;Acc:MGI:1858259]	14125	0.123899	0.567165	0.572582	0.971727	Increase	nonDE	0.0455163	0.196734	0.844658	0.985587	Increase	nonDE	-0.316907	-1.48098	0.14351	0.655033	Decrease	nonDE	0.486321	2.12377	0.0375527	0.659766	Increase	nonDE	-0.0906932	-0.413532	0.680597	0.999557	Decrease	nonDE	-0.152641	-0.67848	0.499909	0.978155	Decrease	nonDE	-0.549208	-2.41536	0.0185802	0.170743	Decrease
436	ENSMUSG00000002985	7	19430034	19433113	Apoe	Apoe	apolipoprotein E [Source:MGI Symbol;Acc:MGI:88057]	3079	0.0235705	0.262685	0.793635	0.986922	Increase	nonDE	-0.14565	-1.57653	0.119825	0.866234	Decrease	nonDE	0.0286715	0.306762	0.760018	0.939903	Increase	nonDE	-0.15075	-1.55772	0.124221	0.674283	Decrease	nonDE	-0.0837637	-1.00978	0.316395	0.999557	Decrease	nonDE	-0.125643	-1.46523	0.147745	0.888989	Decrease	nonDE	0.0597858	0.666976	0.507181	0.745553	Increase
437	ENSMUSG00000002996	12	31976253	32000534	Hbp1	Hbp1	high mobility group box transcription factor 1 [Source:MGI Symbol;Acc:MGI:894659]	24281	-0.0408908	-0.266526	0.79069	0.986922	Decrease	nonDE	0.053013	0.329959	0.742506	0.974082	Increase	nonDE	-0.143261	-0.906001	0.368328	0.786406	Decrease	nonDE	0.155383	0.933467	0.354081	0.777663	Increase	nonDE	0.162873	1.20156	0.233952	0.999557	Increase	nonDE	-0.107266	-0.742059	0.460761	0.975671	Decrease	nonDE	0.104524	0.713024	0.478418	0.724624	Increase
438	ENSMUSG00000002997	12	32008475	32111295	Prkar2b	Prkar2b	protein kinase, cAMP dependent regulatory, type II beta [Source:MGI Symbol;Acc:MGI:97760]	102820	-0.11971	-0.630505	0.530605	0.964584	Decrease	nonDE	-0.286479	-1.52443	0.13232	0.866234	Decrease	nonDE	-0.167517	-0.842453	0.402666	0.800156	Decrease	nonDE	-0.238672	-1.20181	0.233858	0.7211	Decrease	nonDE	0.144855	0.849285	0.398882	0.999557	Increase	nonDE	-0.00125074	-0.00675657	0.99463	0.999888	Decrease	nonDE	0.334027	1.71997	0.0902609	0.335183	Increase
439	ENSMUSG00000003031	6	134897364	134902476	Cdkn1b	Cdkn1b	cyclin-dependent kinase inhibitor 1B [Source:MGI Symbol;Acc:MGI:104565]	5112	-0.0189958	-0.203233	0.839597	0.990197	Decrease	nonDE	0.057026	0.584374	0.561019	0.944989	Increase	nonDE	0.221364	2.22254	0.0297801	0.526396	Increase	nonDE	-0.183333	-1.7584	0.0834507	0.662099	Decrease	nonDE	-0.085408	-0.96796	0.336701	0.999557	Decrease	nonDE	0.111531	1.19877	0.235028	0.925473	Increase	nonDE	-0.0796889	-0.846494	0.400425	0.669997	Decrease
440	ENSMUSG00000003032	4	55527143	55532466	Klf4	Klf4	Kruppel-like factor 4 (gut) [Source:MGI Symbol;Acc:MGI:1342287]	5323	0.365292	1.44524	0.15326	0.914925	Increase	nonDE	-0.394582	-1.49273	0.140412	0.866234	Decrease	nonDE	-0.151142	-0.606717	0.546181	0.8622	Decrease	nonDE	0.121852	0.463348	0.644684	0.899238	Increase	nonDE	0.0950141	0.469256	0.640479	0.999557	Increase	nonDE	-0.224547	-1.05666	0.29463	0.943286	Decrease	nonDE	0.62527	2.5681	0.0125661	0.145541	Increase
441	ENSMUSG00000003033	8	72993862	73011229	Ap1m1	Ap1m1	adaptor-related protein complex AP-1, mu subunit 1 [Source:MGI Symbol;Acc:MGI:102776]	17367	0.0519333	0.349775	0.727654	0.986466	Increase	nonDE	-0.152684	-1.00073	0.320721	0.907555	Decrease	nonDE	0.0702234	0.447184	0.656249	0.903783	Increase	nonDE	-0.170974	-1.05435	0.295679	0.752803	Decrease	nonDE	0.157545	1.21975	0.227026	0.999557	Increase	nonDE	-0.32067	-2.39363	0.019619	0.738883	Decrease	nonDE	0.368248	2.51621	0.0143762	0.153076	Increase
442	ENSMUSG00000003037	8	72915044	72937748	Rab8a	Rab8a	RAB8A, member RAS oncogene family [Source:MGI Symbol;Acc:MGI:96960]	22704	-0.0453923	-0.290009	0.772745	0.986803	Decrease	nonDE	0.0327103	0.199573	0.842446	0.985314	Increase	nonDE	0.0616631	0.36936	0.713076	0.923231	Increase	nonDE	-0.0743451	-0.424331	0.672745	0.910033	Decrease	nonDE	-0.193539	-1.31062	0.194662	0.999557	Decrease	nonDE	-0.154118	-1.02385	0.309752	0.947522	Decrease	nonDE	-0.1623	-1.01826	0.312383	0.595166	Decrease
443	ENSMUSG00000003038	4	133692049	133695961	Hmgn2	Hmgn2	high mobility group nucleosomal binding domain 2 [Source:MGI Symbol;Acc:MGI:96136]	3912	0.723714	1.27525	0.206822	0.914925	Increase	nonDE	-0.564469	-0.949403	0.345981	0.913262	Decrease	nonDE	0.276811	0.479292	0.633361	0.892905	Increase	nonDE	-0.117565	-0.19307	0.847514	0.960851	Decrease	nonDE	0.457152	0.843012	0.402355	0.999557	Increase	nonDE	0.382519	0.644687	0.52143	0.979776	Increase	nonDE	0.213683	0.379258	0.705749	0.868054	Increase
444	ENSMUSG00000003039	8	72973574	72978262	Fam32a	Fam32a	family with sequence similarity 32, member A [Source:MGI Symbol;Acc:MGI:1915172]	4688	-0.0122554	-0.0707269	0.943835	0.995429	Decrease	nonDE	-0.218063	-1.23086	0.22287	0.886319	Decrease	nonDE	0.00507614	0.0280281	0.977727	0.996415	Increase	nonDE	-0.235395	-1.26358	0.210956	0.711641	Decrease	nonDE	-0.164427	-1.01536	0.31375	0.999557	Decrease	nonDE	-0.153625	-0.924172	0.358862	0.956581	Decrease	nonDE	-0.164039	-0.951376	0.344986	0.624461	Decrease
445	ENSMUSG00000003062	13	19541846	19579965	Stard3nl	Stard3nl	STARD3 N-terminal like [Source:MGI Symbol;Acc:MGI:1923455]	38119	-0.200336	-1.00463	0.318853	0.930434	Decrease	nonDE	-0.00784832	-0.0387785	0.969187	0.997115	Decrease	nonDE	-0.0531265	-0.247391	0.805396	0.952816	Decrease	nonDE	-0.155058	-0.707409	0.481875	0.835574	Decrease	nonDE	-0.179408	-0.934796	0.353401	0.999557	Decrease	nonDE	-0.130271	-0.666454	0.507512	0.979632	Decrease	nonDE	-0.334018	-1.63571	0.106801	0.361011	Decrease
446	ENSMUSG00000003068	10	79951637	79966516	Stk11	Stk11	serine/threonine kinase 11 [Source:MGI Symbol;Acc:MGI:1341870]	14879	0.111316	0.719381	0.47452	0.959726	Increase	nonDE	-0.236386	-1.48304	0.142963	0.866234	Decrease	nonDE	0.115825	0.711664	0.479254	0.834999	Increase	nonDE	-0.240896	-1.42978	0.157634	0.690234	Decrease	nonDE	0.00891087	0.0661179	0.94749	0.999557	Increase	nonDE	0.371605	2.49178	0.0153073	0.721732	Increase	nonDE	0.265026	1.74015	0.0866295	0.327865	Increase
447	ENSMUSG00000003070	10	80015316	80025844	Efna2	Efna2	ephrin A2 [Source:MGI Symbol;Acc:MGI:102707]	10528	0.0253892	0.0876815	0.930403	0.994927	Increase	nonDE	0.0659933	0.213021	0.831986	0.984446	Increase	nonDE	-0.138238	-0.469482	0.640318	0.896362	Decrease	nonDE	0.229621	0.724787	0.471219	0.832112	Increase	nonDE	0.186792	0.68114	0.498235	0.999557	Increase	nonDE	-0.040474	-0.136544	0.891819	0.997348	Decrease	nonDE	-0.279186	-0.973264	0.33408	0.615	Decrease
448	ENSMUSG00000003072	10	79974466	79981652	Atp5d	Atp5d	ATP synthase, H+ transporting, mitochondrial F1 complex, delta subunit [Source:MGI Symbol;Acc:MGI:1913293]	7186	-0.0520585	-0.368756	0.713524	0.985902	Decrease	nonDE	-0.0376687	-0.258321	0.796987	0.979871	Decrease	nonDE	-0.0387129	-0.262544	0.793744	0.950195	Decrease	nonDE	-0.0510143	-0.333203	0.740068	0.928881	Decrease	nonDE	0.029588	0.219	0.827345	0.999557	Increase	nonDE	-0.418912	-3.04703	0.00335392	0.721732	Decrease	nonDE	-0.0269105	-0.186417	0.852706	0.940867	Decrease
449	ENSMUSG00000003099	7	16738565	16761849	Ppp5c	Ppp5c	protein phosphatase 5, catalytic subunit [Source:MGI Symbol;Acc:MGI:102666]	23284	-0.0267829	-0.124138	0.901594	0.994099	Decrease	nonDE	0.0965294	0.424255	0.6728	0.963347	Increase	nonDE	-0.247568	-1.13253	0.261629	0.730762	Decrease	nonDE	0.317315	1.36745	0.17626	0.696674	Increase	nonDE	0.107736	0.533672	0.595414	0.999557	Increase	nonDE	-0.0246068	-0.114365	0.909306	0.998625	Decrease	nonDE	-0.048781	-0.222616	0.824542	0.92698	Decrease
450	ENSMUSG00000003119	11	98093885	98169330	Cdk12	Cdk12	cyclin-dependent kinase 12 [Source:MGI Symbol;Acc:MGI:1098802]	75445	0.241005	1.44668	0.152857	0.914925	Increase	nonDE	-0.16718	-0.959789	0.340767	0.912008	Decrease	nonDE	0.299424	1.6986	0.0942417	0.608376	Increase	nonDE	-0.225599	-1.22034	0.226805	0.719097	Decrease	nonDE	-0.102439	-0.713571	0.478082	0.999557	Decrease	nonDE	0.259211	1.67831	0.0981547	0.849523	Increase	nonDE	0.193013	1.20629	0.232138	0.515956	Increase
451	ENSMUSG00000003123	7	25078952	25098135	Lipe	Lipe	lipase, hormone sensitive [Source:MGI Symbol;Acc:MGI:96790]	19183	-0.550521	-2.12025	0.0378596	0.914925	Decrease	nonDE	0.315027	1.17974	0.24246	0.895613	Increase	nonDE	-0.0890266	-0.3052	0.761202	0.940322	Decrease	nonDE	-0.146467	-0.487446	0.627604	0.892199	Decrease	nonDE	0.0714591	0.285314	0.776323	0.999557	Increase	nonDE	-0.445061	-1.74242	0.0862286	0.838748	Decrease	nonDE	-0.442858	-1.74355	0.0860306	0.326936	Decrease
452	ENSMUSG00000003131	9	45874157	45923988	Pafah1b2	Pafah1b2	platelet-activating factor acetylhydrolase, isoform 1b, subunit 2 [Source:MGI Symbol;Acc:MGI:108415]	49831	-0.0106037	-0.109934	0.912805	0.994099	Decrease	nonDE	0.020776	0.206819	0.836806	0.98457	Increase	nonDE	-0.0761321	-0.762489	0.448564	0.820628	Decrease	nonDE	0.0863044	0.825631	0.412075	0.805831	Increase	nonDE	0.0890616	0.981514	0.330028	0.999557	Increase	nonDE	-0.146723	-1.5487	0.126377	0.868912	Decrease	nonDE	0.0444385	0.459292	0.647578	0.833737	Increase
453	ENSMUSG00000003134	1	39410573	39517836	Tbc1d8	Tbc1d8	TBC1 domain family, member 8 [Source:MGI Symbol;Acc:MGI:1927225]	107263	0.142568	0.76387	0.447747	0.955557	Increase	nonDE	0.0124447	0.0626382	0.950249	0.99507	Increase	nonDE	0.0953056	0.485047	0.629296	0.891439	Increase	nonDE	0.0597076	0.284966	0.776588	0.941599	Increase	nonDE	-0.0205038	-0.129213	0.897594	0.999557	Decrease	nonDE	0.249382	1.43571	0.155947	0.89229	Increase	nonDE	0.376424	2.0385	0.0456283	0.247785	Increase
454	ENSMUSG00000003135	1	39574073	39585970	Cnot11	Cnot11	CCR4-NOT transcription complex, subunit 11 [Source:MGI Symbol;Acc:MGI:106580]	11897	0.308185	1.58178	0.11862	0.914925	Increase	nonDE	-0.393066	-1.96703	0.0535104	0.857116	Decrease	nonDE	-0.0200192	-0.1028	0.918442	0.980174	Decrease	nonDE	-0.064862	-0.322107	0.74842	0.933061	Decrease	nonDE	0.155063	0.907424	0.36758	0.999557	Increase	nonDE	-0.154183	-0.851337	0.397751	0.962487	Decrease	nonDE	0.266606	1.37843	0.172861	0.450703	Increase
455	ENSMUSG00000003153	6	122704768	122778599	Slc2a3	Slc2a3	solute carrier family 2 (facilitated glucose transporter), member 3 [Source:MGI Symbol;Acc:MGI:95757]	73831	0.0818625	0.664983	0.508446	0.962951	Increase	nonDE	0.0100925	0.0780676	0.938017	0.994617	Increase	nonDE	0.00647548	0.0506001	0.959802	0.991723	Increase	nonDE	0.0854796	0.633357	0.528753	0.856798	Increase	nonDE	-0.0380789	-0.330922	0.741783	0.999557	Decrease	nonDE	-0.0701948	-0.585258	0.560428	0.983222	Decrease	nonDE	-0.0510022	-0.411302	0.682223	0.854606	Decrease
456	ENSMUSG00000003154	6	122796873	122822325	Foxj2	Foxj2	forkhead box J2 [Source:MGI Symbol;Acc:MGI:1926805]	25452	0.359046	1.8709	0.0659229	0.914925	Increase	nonDE	-0.0880412	-0.429393	0.669077	0.962753	Decrease	nonDE	0.209604	1.06028	0.292993	0.749258	Increase	nonDE	0.0614006	0.289542	0.773101	0.940731	Increase	nonDE	0.338855	1.97146	0.0529895	0.999557	Increase	nonDE	-0.00376677	-0.0199855	0.984117	0.999888	Decrease	nonDE	0.098589	0.541105	0.59031	0.799585	Increase
457	ENSMUSG00000003161	5	8096078	8119379	Sri	Sri	sorcin [Source:MGI Symbol;Acc:MGI:98419]	23301	-0.177752	-1.55704	0.124382	0.914925	Decrease	nonDE	0.201819	1.68974	0.0959345	0.857116	Increase	nonDE	-0.078908	-0.657161	0.513429	0.852026	Decrease	nonDE	0.102974	0.816817	0.417057	0.807441	Increase	nonDE	-0.189644	-1.72427	0.0894773	0.999557	Decrease	nonDE	0.0542356	0.473112	0.63774	0.989379	Increase	nonDE	-0.341391	-2.95158	0.00441209	0.09712	Decrease
458	ENSMUSG00000003166	16	17657346	17716426	Dgcr2	Dgcr2	DiGeorge syndrome critical region gene 2 [Source:MGI Symbol;Acc:MGI:892866]	59080	0.241498	2.25698	0.0274241	0.914925	Increase	nonDE	-0.159323	-1.42548	0.158868	0.868326	Decrease	nonDE	0.256019	2.28376	0.0257077	0.507218	Increase	nonDE	-0.173844	-1.47871	0.144114	0.683879	Decrease	nonDE	-0.0166949	-0.169826	0.865682	0.999557	Decrease	nonDE	0.0664111	0.639888	0.524525	0.979776	Increase	nonDE	0.0669305	0.631796	0.529766	0.760151	Increase
459	ENSMUSG00000003184	7	44647072	44652272	Irf3	Irf3	interferon regulatory factor 3 [Source:MGI Symbol;Acc:MGI:1859179]	5200	0.615994	1.98526	0.0513963	0.914925	Increase	nonDE	-0.416084	-1.25301	0.214753	0.883561	Decrease	nonDE	0.368664	1.17231	0.245408	0.718767	Increase	nonDE	-0.168754	-0.498473	0.619856	0.889831	Decrease	nonDE	0.180585	0.618695	0.538309	0.999557	Increase	nonDE	-0.126442	-0.402499	0.688656	0.99144	Decrease	nonDE	-0.220063	-0.734331	0.465424	0.716293	Decrease
460	ENSMUSG00000003190	7	44640646	44648136	Bcl2l12	Bcl2l12	BCL2-like 12 (proline rich) [Source:MGI Symbol;Acc:MGI:1922986]	7490	0.611704	1.21309	0.229547	0.919218	Increase	nonDE	-0.370581	-0.705566	0.483013	0.932116	Decrease	nonDE	-0.829595	-1.65718	0.102368	0.618012	Decrease	nonDE	1.07072	2.03562	0.0459257	0.659766	Increase	nonDE	0.328388	0.650315	0.517812	0.999557	Increase	nonDE	-0.527087	-1.01395	0.314416	0.947522	Decrease	nonDE	-0.173287	-0.334119	0.73938	0.885296	Decrease
461	ENSMUSG00000003198	17	56199093	56205928	Zfp959	Zfp959	zinc finger protein 959 [Source:MGI Symbol;Acc:MGI:2385058]	6835	0.0271993	0.0614277	0.95121	0.995429	Increase	nonDE	0.415493	0.854718	0.395889	0.917525	Increase	nonDE	0.213198	0.44727	0.656188	0.903783	Increase	nonDE	0.229494	0.44056	0.661013	0.904712	Increase	nonDE	-0.731815	-1.86148	0.0672607	0.999557	Decrease	nonDE	0.0607638	0.163137	0.870924	0.995883	Increase	nonDE	-0.460527	-1.04833	0.298423	0.582258	Decrease
462	ENSMUSG00000003199	17	56312711	56323790	Mpnd	Mpnd	MPN domain containing [Source:MGI Symbol;Acc:MGI:1915297]	11079	-0.12652	-0.824711	0.412593	0.951419	Decrease	nonDE	0.114215	0.713577	0.478078	0.930733	Increase	nonDE	0.0353851	0.216368	0.829388	0.958111	Increase	nonDE	-0.0476903	-0.278746	0.781336	0.94269	Decrease	nonDE	0.000933316	0.00658822	0.994764	0.999557	Increase	nonDE	-0.0137459	-0.0920519	0.926944	0.999888	Decrease	nonDE	0.0422844	0.274194	0.784817	0.908983	Increase
463	ENSMUSG00000003200	17	56323750	56343635	Sh3gl1	Sh3gl1	SH3-domain GRB2-like 1 [Source:MGI Symbol;Acc:MGI:700010]	19885	-0.228312	-0.675731	0.501642	0.961736	Decrease	nonDE	0.321352	0.894514	0.374393	0.916342	Increase	nonDE	-0.400309	-1.16703	0.247519	0.719873	Decrease	nonDE	0.493348	1.34449	0.183527	0.698034	Increase	nonDE	0.0780832	0.225728	0.822131	0.999557	Increase	nonDE	0.0833745	0.221621	0.825313	0.995216	Increase	nonDE	-0.471093	-1.31963	0.19165	0.472163	Decrease
464	ENSMUSG00000003206	17	56259640	56264022	Ebi3	Ebi3	Epstein-Barr virus induced gene 3 [Source:MGI Symbol;Acc:MGI:1354171]	4382	0.130885	0.265351	0.79159	0.986922	Increase	nonDE	-0.752607	-1.50567	0.137063	0.866234	Decrease	nonDE	-0.0415178	-0.0817911	0.935068	0.984693	Decrease	nonDE	-0.580204	-1.11966	0.267037	0.741674	Decrease	nonDE	0.424102	0.869229	0.387964	0.999557	Increase	nonDE	-0.468412	-0.927494	0.357148	0.955656	Decrease	nonDE	-0.219239	-0.438557	0.662457	0.842942	Decrease
465	ENSMUSG00000003208	17	56266099	56275285	Yju2	Yju2	YJU2 splicing factor [Source:MGI Symbol;Acc:MGI:1920136]	9186	-0.145401	-0.425876	0.671625	0.97841	Decrease	nonDE	-0.105803	-0.304829	0.761484	0.976695	Decrease	nonDE	0.490043	1.21109	0.230305	0.708818	Increase	nonDE	-0.741247	-1.79807	0.0768739	0.660017	Decrease	nonDE	-0.613163	-1.94172	0.0565669	0.999557	Decrease	nonDE	0.015449	0.0494754	0.960694	0.999888	Increase	nonDE	0.842823	1.87829	0.0648895	0.288217	Increase
466	ENSMUSG00000003226	10	58282742	58330178	Ranbp2	Ranbp2	RAN binding protein 2 [Source:MGI Symbol;Acc:MGI:894323]	47436	0.107785	0.873295	0.385761	0.945745	Increase	nonDE	-0.100142	-0.779823	0.438364	0.929096	Decrease	nonDE	0.275069	2.09606	0.0400288	0.539473	Increase	nonDE	-0.267426	-1.95232	0.0552688	0.659766	Decrease	nonDE	0.00699516	0.0609194	0.951613	0.999557	Increase	nonDE	0.11965	0.978196	0.331654	0.95087	Increase	nonDE	0.215223	1.71918	0.0904068	0.335313	Increase
467	ENSMUSG00000003228	19	60878187	61084406	Grk5	Grk5	G protein-coupled receptor kinase 5 [Source:MGI Symbol;Acc:MGI:109161]	206219	0.216259	0.947713	0.346834	0.940516	Increase	nonDE	-0.262312	-1.10934	0.271427	0.899364	Decrease	nonDE	0.317894	1.31347	0.193706	0.686573	Increase	nonDE	-0.363946	-1.44572	0.153125	0.687976	Decrease	nonDE	0.00338043	0.0176793	0.98595	0.999557	Increase	nonDE	0.338315	1.58355	0.118216	0.866124	Increase	nonDE	0.479213	2.07221	0.0422724	0.239787	Increase
468	ENSMUSG00000003233	16	20335732	20352760	Dvl3	Dvl3	dishevelled segment polarity protein 3 [Source:MGI Symbol;Acc:MGI:108100]	17028	-0.0788307	-0.171079	0.8647	0.992818	Decrease	nonDE	-0.0392526	-0.082529	0.934483	0.993615	Decrease	nonDE	0.860002	1.72089	0.0900933	0.606424	Increase	nonDE	-0.978085	-1.8906	0.0631981	0.659766	Decrease	nonDE	0.234492	0.504871	0.615381	0.999557	Increase	nonDE	0.0346413	0.0705479	0.943977	0.999888	Increase	nonDE	0.037987	0.0784174	0.93774	0.975848	Increase
469	ENSMUSG00000003234	16	20367327	20380129	Abcf3	Abcf3	ATP-binding cassette, sub-family F (GCN20), member 3 [Source:MGI Symbol;Acc:MGI:1351656]	12802	-0.0574729	-0.30803	0.759058	0.986466	Decrease	nonDE	-0.0976734	-0.512949	0.60975	0.954897	Decrease	nonDE	-0.189132	-0.991049	0.325387	0.768279	Decrease	nonDE	0.033986	0.17325	0.863001	0.96471	Increase	nonDE	0.0637814	0.374093	0.70957	0.999557	Increase	nonDE	-0.1276	-0.70952	0.480574	0.975723	Decrease	nonDE	0.200752	1.03781	0.303256	0.585992	Increase
470	ENSMUSG00000003235	16	20317567	20328073	Eif2b5	Eif2b5	eukaryotic translation initiation factor 2B, subunit 5 epsilon [Source:MGI Symbol;Acc:MGI:2446176]	10506	-0.235292	-1.32069	0.191298	0.914925	Decrease	nonDE	-0.0293598	-0.161483	0.87222	0.986868	Decrease	nonDE	-0.0517522	-0.271223	0.787091	0.949016	Decrease	nonDE	-0.212899	-1.08772	0.280792	0.748502	Decrease	nonDE	-0.240958	-1.46874	0.146794	0.999557	Decrease	nonDE	-0.153873	-0.918935	0.361574	0.956629	Decrease	nonDE	-0.103373	-0.578492	0.564958	0.782093	Decrease
471	ENSMUSG00000003269	7	45456061	45464005	Cyth2	Cyth2	cytohesin 2 [Source:MGI Symbol;Acc:MGI:1334255]	7944	-0.042229	-0.249727	0.803597	0.988923	Decrease	nonDE	-0.104189	-0.601597	0.549564	0.942749	Decrease	nonDE	-0.0695783	-0.394	0.694888	0.918984	Decrease	nonDE	-0.0768393	-0.422345	0.674186	0.910737	Decrease	nonDE	-0.13462	-0.858239	0.393958	0.999557	Decrease	nonDE	-0.10922	-0.673892	0.502802	0.979245	Decrease	nonDE	-0.0949975	-0.5526	0.582459	0.794451	Decrease
472	ENSMUSG00000003271	7	45379407	45434093	Sult2b1	Sult2b1	sulfotransferase family, cytosolic, 2B, member 1 [Source:MGI Symbol;Acc:MGI:1926342]	54686	-0.315985	-0.626036	0.533514	0.96465	Decrease	nonDE	0.0643092	0.124189	0.901554	0.989201	Increase	nonDE	0.211931	0.402177	0.688891	0.916527	Increase	nonDE	-0.463607	-0.852554	0.39708	0.801086	Decrease	nonDE	-0.362569	-0.73532	0.464826	0.999557	Decrease	nonDE	0.356464	0.697189	0.488205	0.97719	Increase	nonDE	0.146085	0.280412	0.780064	0.906733	Increase
473	ENSMUSG00000003273	7	45349267	45354106	Car11	Car11	carbonic anhydrase 11 [Source:MGI Symbol;Acc:MGI:1336193]	4839	0.0119527	0.0731343	0.941927	0.995429	Increase	nonDE	0.0355023	0.206053	0.837402	0.98457	Increase	nonDE	0.090084	0.512286	0.610211	0.885669	Increase	nonDE	-0.0426289	-0.229822	0.818962	0.954041	Decrease	nonDE	-0.213182	-1.44488	0.153362	0.999557	Decrease	nonDE	-0.103566	-0.688007	0.49393	0.977398	Decrease	nonDE	-0.140621	-0.870878	0.38707	0.659887	Decrease
474	ENSMUSG00000003279	17	70276068	71128408	Dlgap1	Dlgap1	DLG associated protein 1 [Source:MGI Symbol;Acc:MGI:1346065]	852340	0.0432996	0.643227	0.52237	0.962951	Increase	nonDE	0.048745	0.691171	0.491953	0.933225	Increase	nonDE	0.165518	2.33241	0.0228303	0.49585	Increase	nonDE	-0.0734733	-0.985111	0.328272	0.766549	Decrease	nonDE	0.0684398	1.09265	0.278634	0.999557	Increase	nonDE	0.101342	1.51805	0.133917	0.875182	Increase	nonDE	0.133682	1.9844	0.0514939	0.260413	Increase
475	ENSMUSG00000003282	4	3900996	3938423	Plag1	Plag1	pleiomorphic adenoma gene 1 [Source:MGI Symbol;Acc:MGI:1891916]	37427	0.352949	0.74935	0.456387	0.956047	Increase	nonDE	-0.265361	-0.540576	0.590673	0.951194	Decrease	nonDE	0.0784302	0.165363	0.869179	0.968561	Increase	nonDE	0.00915763	0.0183886	0.985386	0.998324	Increase	nonDE	0.264548	0.600159	0.550516	0.999557	Increase	nonDE	-0.0349804	-0.0732845	0.941808	0.999888	Decrease	nonDE	0.684838	1.39304	0.168418	0.445914	Increase
476	ENSMUSG00000003283	2	152950388	152993361	Hck	Hck	hemopoietic cell kinase [Source:MGI Symbol;Acc:MGI:96052]	42973	-0.0585641	-0.106242	0.915722	0.994099	Decrease	nonDE	0.594926	1.02163	0.310794	0.907555	Increase	nonDE	-0.387455	-0.687129	0.494479	0.840376	Decrease	nonDE	0.923817	1.54234	0.127912	0.674283	Increase	nonDE	0.780146	1.41034	0.163273	0.999557	Increase	nonDE	0.129006	0.217941	0.828167	0.995216	Increase	nonDE	-0.607443	-1.11167	0.270432	0.554881	Decrease
477	ENSMUSG00000003299	9	20914034	20920135	Mrpl4	Mrpl4	mitochondrial ribosomal protein L4 [Source:MGI Symbol;Acc:MGI:2137210]	6101	-0.177162	-0.932276	0.354691	0.943336	Decrease	nonDE	-0.0209071	-0.107502	0.914726	0.991546	Decrease	nonDE	-0.222033	-1.11441	0.269264	0.7355	Decrease	nonDE	0.0239642	0.116847	0.907346	0.975735	Increase	nonDE	0.00398195	0.0231667	0.981589	0.999557	Increase	nonDE	-0.0745366	-0.409424	0.683593	0.991008	Decrease	nonDE	-0.00218816	-0.0117055	0.990697	0.996738	Decrease
478	ENSMUSG00000003308	9	21141026	21150657	Keap1	Keap1	kelch-like ECH-associated protein 1 [Source:MGI Symbol;Acc:MGI:1858732]	9631	0.0362574	0.290273	0.772544	0.986803	Increase	nonDE	-0.064927	-0.500466	0.61846	0.957471	Decrease	nonDE	0.265074	1.98296	0.0516587	0.554772	Increase	nonDE	-0.293743	-2.10951	0.0388099	0.659766	Decrease	nonDE	-0.108242	-0.933612	0.354007	0.999557	Decrease	nonDE	-0.0296757	-0.246011	0.806459	0.994411	Decrease	nonDE	-0.0265608	-0.213014	0.831992	0.93053	Decrease
479	ENSMUSG00000003316	8	111881053	111985848	Glg1	Glg1	golgi apparatus protein 1 [Source:MGI Symbol;Acc:MGI:104967]	104795	0.100491	0.803566	0.424616	0.95396	Increase	nonDE	-0.127711	-0.984923	0.328364	0.908016	Decrease	nonDE	0.328272	2.46526	0.016379	0.4643	Increase	nonDE	-0.355491	-2.56579	0.0126421	0.659766	Decrease	nonDE	0.0335409	0.290107	0.77267	0.999557	Increase	nonDE	-0.00390376	-0.0320386	0.974541	0.999888	Decrease	nonDE	0.351487	2.76476	0.00742995	0.120998	Increase
480	ENSMUSG00000003341	10	80355418	80374958	Atp8b3	Atp8b3	ATPase, class I, type 8B, member 3 [Source:MGI Symbol;Acc:MGI:1914581]	19540	-0.471596	-0.83352	0.407646	0.949571	Decrease	nonDE	0.451302	0.772108	0.442887	0.929096	Increase	nonDE	-0.31796	-0.541997	0.589699	0.877716	Decrease	nonDE	0.297666	0.488373	0.626952	0.891922	Increase	nonDE	0.460849	0.820595	0.414917	0.999557	Increase	nonDE	0.0537467	0.0911764	0.927637	0.999888	Increase	nonDE	0.418045	0.718777	0.474889	0.72226	Increase
481	ENSMUSG00000003344	10	80478451	80492905	Btbd2	Btbd2	BTB (POZ) domain containing 2 [Source:MGI Symbol;Acc:MGI:1933831]	14454	0.242205	0.892053	0.3757	0.945006	Increase	nonDE	-0.366016	-1.3161	0.192825	0.882339	Decrease	nonDE	0.16341	0.590189	0.557138	0.867237	Increase	nonDE	-0.287221	-1.00569	0.318346	0.761533	Decrease	nonDE	0.271611	1.12211	0.266	0.999557	Increase	nonDE	-0.154444	-0.587978	0.558612	0.983222	Decrease	nonDE	-0.0109864	-0.0416039	0.966944	0.98768	Decrease
482	ENSMUSG00000003345	10	80458672	80476583	Csnk1g2	Csnk1g2	casein kinase 1, gamma 2 [Source:MGI Symbol;Acc:MGI:1920014]	17911	0.0901032	0.420572	0.675474	0.97841	Increase	nonDE	-0.1116	-0.502524	0.617021	0.957395	Decrease	nonDE	-0.247847	-1.14498	0.256475	0.727418	Decrease	nonDE	0.22635	1.00138	0.320407	0.762405	Increase	nonDE	0.262219	1.27998	0.205164	0.999557	Increase	nonDE	-0.161608	-0.744874	0.45907	0.975671	Decrease	nonDE	-0.0885081	-0.412373	0.681442	0.854095	Decrease
483	ENSMUSG00000003346	10	80419488	80426175	Abhd17a	Abhd17a	abhydrolase domain containing 17A [Source:MGI Symbol;Acc:MGI:106388]	6687	-0.118393	-0.554882	0.580906	0.973503	Decrease	nonDE	0.18248	0.811226	0.420237	0.924801	Increase	nonDE	-0.394	-1.82875	0.0720877	0.581864	Decrease	nonDE	0.458086	2.00281	0.0494295	0.659766	Increase	nonDE	0.210421	1.02374	0.309804	0.999557	Increase	nonDE	-0.191166	-0.884168	0.379909	0.962347	Decrease	nonDE	-0.0142409	-0.0644596	0.948805	0.980456	Decrease
484	ENSMUSG00000003348	10	80521087	80537811	Mob3a	Mob3a	MOB kinase activator 3A [Source:MGI Symbol;Acc:MGI:3050117]	16724	0.516197	1.28274	0.204202	0.914925	Increase	nonDE	-0.529989	-1.27337	0.207483	0.883214	Decrease	nonDE	0.1853	0.467026	0.642064	0.896774	Increase	nonDE	-0.199092	-0.480767	0.632318	0.894656	Decrease	nonDE	0.285327	0.792116	0.431214	0.999557	Increase	nonDE	-0.665192	-1.80304	0.0760815	0.830809	Decrease	nonDE	0.31731	0.810558	0.420618	0.685108	Increase
485	ENSMUSG00000003352	15	98528721	98542410	Cacnb3	Cacnb3	calcium channel, voltage-dependent, beta 3 subunit [Source:MGI Symbol;Acc:MGI:103307]	13689	0.0983693	0.344203	0.73182	0.986466	Increase	nonDE	0.0145586	0.0481499	0.961746	0.997115	Increase	nonDE	0.263981	0.86052	0.392709	0.795352	Increase	nonDE	-0.151053	-0.465257	0.643324	0.899238	Decrease	nonDE	0.201843	0.771776	0.443082	0.999557	Increase	nonDE	-0.226819	-0.809107	0.421446	0.967645	Decrease	nonDE	0.164573	0.580729	0.563459	0.780852	Increase
486	ENSMUSG00000003354	15	98606088	98621217	Ccdc65	Ccdc65	coiled-coil domain containing 65 [Source:MGI Symbol;Acc:MGI:2146001]	15129	0.903444	1.77553	0.0805561	0.914925	Increase	nonDE	-1.18868	-2.29998	0.0247144	0.857116	Decrease	nonDE	0.298883	0.57869	0.564826	0.868646	Increase	nonDE	-0.584124	-1.10493	0.27332	0.746539	Decrease	nonDE	-0.260259	-0.535543	0.594127	0.999557	Decrease	nonDE	0.590786	1.15009	0.25438	0.927393	Increase	nonDE	0.223306	0.427257	0.670623	0.84763	Increase
487	ENSMUSG00000003355	15	98622247	98626079	Fkbp11	Fkbp11	FK506 binding protein 11 [Source:MGI Symbol;Acc:MGI:1913370]	3832	-0.126126	-0.231912	0.817345	0.989901	Decrease	nonDE	0.0250713	0.0446702	0.964509	0.997115	Increase	nonDE	-0.441736	-0.795051	0.429517	0.812134	Decrease	nonDE	0.340681	0.590173	0.557149	0.865697	Increase	nonDE	-0.225314	-0.407417	0.685059	0.999557	Decrease	nonDE	0.255765	0.446382	0.656825	0.989624	Increase	nonDE	-0.490515	-0.85808	0.394045	0.664802	Decrease
488	ENSMUSG00000003360	15	98543015	98560775	Ddx23	Ddx23	DEAD box helicase 23 [Source:MGI Symbol;Acc:MGI:1921601]	17760	0.109591	0.65307	0.516046	0.962951	Increase	nonDE	-0.084913	-0.482522	0.631078	0.959124	Decrease	nonDE	0.0557527	0.317333	0.752022	0.937031	Increase	nonDE	-0.0310751	-0.168046	0.867076	0.965485	Decrease	nonDE	-0.139145	-0.947783	0.346798	0.999557	Decrease	nonDE	-0.0164432	-0.106898	0.915204	0.998625	Decrease	nonDE	-0.0316368	-0.195882	0.845322	0.937455	Decrease
489	ENSMUSG00000003363	7	27231425	27252643	Pld3	Pld3	phospholipase D family, member 3 [Source:MGI Symbol;Acc:MGI:1333782]	21218	0.112061	0.493383	0.623428	0.974913	Increase	nonDE	-0.35052	-1.52045	0.133313	0.866234	Decrease	nonDE	-0.163314	-0.714858	0.477292	0.833824	Decrease	nonDE	-0.0751454	-0.321463	0.748905	0.933061	Decrease	nonDE	0.178955	0.852415	0.397156	0.999557	Increase	nonDE	-0.212829	-0.967814	0.336773	0.951231	Decrease	nonDE	0.120962	0.524355	0.60184	0.806719	Increase
490	ENSMUSG00000003378	7	24709274	24771771	Grik5	Grik5	glutamate receptor, ionotropic, kainate 5 (gamma 2) [Source:MGI Symbol;Acc:MGI:95818]	62497	0.535887	1.80903	0.075134	0.914925	Increase	nonDE	-0.274292	-0.868469	0.388376	0.916342	Decrease	nonDE	0.321164	1.06817	0.289447	0.747303	Increase	nonDE	-0.0595682	-0.184735	0.85402	0.962417	Decrease	nonDE	0.183634	0.695035	0.489544	0.999557	Increase	nonDE	-0.392913	-1.44858	0.152328	0.89229	Decrease	nonDE	-0.0148228	-0.0522576	0.958486	0.984358	Decrease
491	ENSMUSG00000003380	7	24669177	24672179	Rabac1	Rabac1	Rab acceptor 1 (prenylated) [Source:MGI Symbol;Acc:MGI:1201692]	3002	-0.115116	-0.837991	0.405149	0.949003	Decrease	nonDE	0.0772448	0.541529	0.59002	0.951194	Increase	nonDE	-0.118102	-0.825529	0.412132	0.80358	Decrease	nonDE	0.080231	0.537409	0.592845	0.878727	Increase	nonDE	-0.017239	-0.128091	0.898478	0.999557	Decrease	nonDE	-0.427598	-3.13937	0.00255958	0.721732	Decrease	nonDE	-0.285627	-2.02858	0.0466589	0.250135	Decrease
492	ENSMUSG00000003382	3	87432714	87447463	Etv3	Etv3	ets variant 3 [Source:MGI Symbol;Acc:MGI:1350926]	14749	-0.0554209	-0.295141	0.76884	0.986803	Decrease	nonDE	-0.0506252	-0.261187	0.794785	0.979581	Decrease	nonDE	-0.317265	-1.67009	0.0997758	0.616604	Decrease	nonDE	0.211219	1.06925	0.288966	0.752597	Increase	nonDE	0.233162	1.32288	0.190575	0.999557	Increase	nonDE	-0.118174	-0.628	0.532234	0.979776	Decrease	nonDE	0.225172	1.17019	0.246257	0.530304	Increase
493	ENSMUSG00000003402	9	21914102	21925518	Prkcsh	Prkcsh	protein kinase C substrate 80K-H [Source:MGI Symbol;Acc:MGI:107877]	11416	0.253895	1.33912	0.185258	0.914925	Increase	nonDE	-0.222231	-1.11986	0.266952	0.898505	Decrease	nonDE	0.487778	2.34549	0.0221073	0.493827	Increase	nonDE	-0.456114	-2.09569	0.0400626	0.659766	Decrease	nonDE	-0.168366	-1.0124	0.315152	0.999557	Decrease	nonDE	0.142892	0.811593	0.420028	0.967487	Increase	nonDE	0.0210571	0.115425	0.908469	0.963001	Increase
494	ENSMUSG00000003410	9	21926301	21963319	Elavl3	Elavl3	ELAV like RNA binding protein 3 [Source:MGI Symbol;Acc:MGI:109157]	37018	0.215633	2.05805	0.043655	0.914925	Increase	nonDE	-0.110647	-1.00938	0.316586	0.907555	Decrease	nonDE	0.104664	0.968384	0.336491	0.773547	Increase	nonDE	0.000321641	0.00282968	0.997751	0.999382	Increase	nonDE	0.0670767	0.702815	0.484715	0.999557	Increase	nonDE	0.198298	1.93424	0.0574986	0.796681	Increase	nonDE	0.261868	2.51992	0.0142394	0.152312	Increase
495	ENSMUSG00000003411	4	108736260	108800521	Rab3b	Rab3b	RAB3B, member RAS oncogene family [Source:MGI Symbol;Acc:MGI:1917158]	64261	-0.0172139	-0.0473067	0.962416	0.995525	Decrease	nonDE	-0.648344	-1.85617	0.0680247	0.857116	Decrease	nonDE	-0.49607	-1.38945	0.169502	0.677976	Decrease	nonDE	-0.169488	-0.490918	0.625161	0.891067	Decrease	nonDE	-0.21122	-0.690206	0.492556	0.999557	Decrease	nonDE	0.0995073	0.309659	0.757824	0.992561	Increase	nonDE	0.0275225	0.0781752	0.937932	0.975879	Increase
496	ENSMUSG00000003418	2	13655832	13798875	St8sia6	St8sia6	ST8 alpha-N-acetyl-neuraminide alpha-2,8-sialyltransferase 6 [Source:MGI Symbol;Acc:MGI:2386797]	143043	-0.515111	-1.21149	0.230153	0.919218	Decrease	nonDE	0.0713878	0.168664	0.866592	0.986868	Increase	nonDE	-0.114565	-0.244603	0.807545	0.952899	Decrease	nonDE	-0.329158	-0.700046	0.486431	0.83793	Decrease	nonDE	0.110813	0.264491	0.79225	0.999557	Increase	nonDE	-0.293925	-0.681427	0.498055	0.977709	Decrease	nonDE	-0.0251917	-0.0562222	0.95534	0.982716	Decrease
497	ENSMUSG00000003420	7	44742414	44753275	Fcgrt	Fcgrt	Fc fragment of IgG receptor and transporter [Source:MGI Symbol;Acc:MGI:103017]	10861	0.0177092	0.0836109	0.933626	0.995121	Increase	nonDE	0.0925682	0.40745	0.685034	0.965018	Increase	nonDE	-0.0887567	-0.401904	0.689091	0.916585	Decrease	nonDE	0.199034	0.838316	0.404967	0.804625	Increase	nonDE	-0.0120253	-0.0650454	0.94834	0.999557	Decrease	nonDE	-0.0749655	-0.385634	0.701044	0.992501	Decrease	nonDE	0.442494	2.00775	0.0488878	0.254486	Increase
498	ENSMUSG00000003421	7	44711853	44727634	Nosip	Nosip	nitric oxide synthase interacting protein [Source:MGI Symbol;Acc:MGI:1913644]	15781	-0.0394736	-0.198729	0.843103	0.990559	Decrease	nonDE	0.246384	1.15131	0.253882	0.896322	Increase	nonDE	0.278719	1.27766	0.205974	0.691869	Increase	nonDE	-0.0718084	-0.306999	0.759839	0.937047	Decrease	nonDE	-0.172249	-0.943923	0.348752	0.999557	Decrease	nonDE	-0.155173	-0.835263	0.406671	0.964751	Decrease	nonDE	-0.204708	-1.0277	0.307954	0.590635	Decrease
499	ENSMUSG00000003423	7	44803727	44809489	Pih1d1	Pih1d1	PIH1 domain containing 1 [Source:MGI Symbol;Acc:MGI:1916095]	5762	0.0346237	0.101066	0.919813	0.994099	Increase	nonDE	0.0151099	0.0419393	0.966677	0.997115	Increase	nonDE	-0.029221	-0.0813593	0.93541	0.984792	Decrease	nonDE	0.0789546	0.208342	0.835622	0.957248	Increase	nonDE	-0.161552	-0.553067	0.582141	0.999557	Decrease	nonDE	-0.119983	-0.399182	0.691085	0.99144	Decrease	nonDE	-0.0170134	-0.0509245	0.959544	0.984431	Decrease
500	ENSMUSG00000003429	7	44771803	44773863	Rps11	Rps11	ribosomal protein S11 [Source:MGI Symbol;Acc:MGI:1351329]	2060	-0.0710981	-0.190291	0.849682	0.991164	Decrease	nonDE	0.0159044	0.0411104	0.967336	0.997115	Increase	nonDE	-0.791791	-2.20562	0.0310023	0.526423	Decrease	nonDE	0.736597	1.95945	0.0544101	0.659766	Increase	nonDE	0.0969873	0.264279	0.792412	0.999557	Increase	nonDE	-0.287474	-0.761209	0.449323	0.975061	Decrease	nonDE	-0.588584	-1.57503	0.12017	0.381704	Decrease
501	ENSMUSG00000003435	7	28014316	28038171	Supt5	Supt5	suppressor of Ty 5, DSIF elongation factor subunit [Source:MGI Symbol;Acc:MGI:1202400]	23855	0.0467614	0.347794	0.729134	0.986466	Increase	nonDE	-0.198455	-1.44145	0.154324	0.868326	Decrease	nonDE	0.125821	0.874244	0.385248	0.794543	Increase	nonDE	-0.277515	-1.87425	0.0654535	0.659766	Decrease	nonDE	0.107541	0.871971	0.386478	0.999557	Increase	nonDE	-0.289746	-2.26554	0.0268646	0.758064	Decrease	nonDE	0.097434	0.727122	0.469798	0.719353	Increase
502	ENSMUSG00000003436	7	27992978	28001663	Dll3	Dll3	delta like canonical Notch ligand 3 [Source:MGI Symbol;Acc:MGI:1096877]	8685	0.237081	0.513104	0.609642	0.974472	Increase	nonDE	-0.481557	-1.01941	0.31184	0.907555	Decrease	nonDE	0.293666	0.611601	0.542964	0.860314	Increase	nonDE	-0.538142	-1.08932	0.28009	0.748311	Decrease	nonDE	-0.265458	-0.538567	0.592051	0.999557	Decrease	nonDE	-0.87264	-1.78103	0.0796447	0.834439	Decrease	nonDE	-0.422125	-0.824945	0.412461	0.679037	Decrease
503	ENSMUSG00000003437	7	28092376	28098813	Paf1	Paf1	Paf1, RNA polymerase II complex component [Source:MGI Symbol;Acc:MGI:1923988]	6437	0.127429	0.842169	0.402824	0.948681	Increase	nonDE	-0.121823	-0.774515	0.441473	0.929096	Decrease	nonDE	0.247351	1.51561	0.134532	0.649791	Increase	nonDE	-0.241745	-1.42178	0.159935	0.691486	Decrease	nonDE	0.0370609	0.277452	0.782325	0.999557	Increase	nonDE	0.111711	0.774559	0.441447	0.974252	Increase	nonDE	0.428942	2.8023	0.00670249	0.117636	Increase
504	ENSMUSG00000003438	7	28004941	28011497	Timm50	Timm50	translocase of inner mitochondrial membrane 50 [Source:MGI Symbol;Acc:MGI:1913775]	6556	0.0406626	0.194214	0.846622	0.991164	Increase	nonDE	0.253047	1.09009	0.279753	0.90163	Increase	nonDE	-0.16464	-0.778187	0.439321	0.816788	Decrease	nonDE	0.458349	1.94314	0.056392	0.659766	Increase	nonDE	-0.168536	-0.867468	0.388921	0.999557	Decrease	nonDE	-0.221446	-1.13166	0.261993	0.929891	Decrease	nonDE	-0.158388	-0.752878	0.454279	0.708401	Decrease
505	ENSMUSG00000003444	7	28085571	28092133	Med29	Med29	mediator complex subunit 29 [Source:MGI Symbol;Acc:MGI:1914474]	6562	0.561466	1.03835	0.303005	0.924765	Increase	nonDE	-0.576769	-1.02487	0.309277	0.907555	Decrease	nonDE	-0.149327	-0.279295	0.780918	0.947096	Decrease	nonDE	0.134024	0.238684	0.812112	0.952247	Increase	nonDE	-0.528372	-1.05413	0.295777	0.999557	Decrease	nonDE	0.0681956	0.134408	0.893501	0.997348	Increase	nonDE	-0.18955	-0.343411	0.732413	0.880881	Decrease
506	ENSMUSG00000003452	6	149310384	149464827	Bicd1	Bicd1	BICD cargo adaptor 1 [Source:MGI Symbol;Acc:MGI:1101760]	154443	0.193246	1.64174	0.105541	0.914925	Increase	nonDE	0.138233	1.10228	0.274458	0.90037	Increase	nonDE	0.134189	1.09748	0.276534	0.73933	Increase	nonDE	0.19729	1.50959	0.136061	0.679178	Increase	nonDE	0.0613164	0.560045	0.5774	0.999557	Increase	nonDE	0.239738	2.03081	0.0464255	0.784556	Increase	nonDE	0.0347761	0.298836	0.766032	0.899738	Increase
507	ENSMUSG00000003458	1	171893580	171910362	Ncstn	Ncstn	nicastrin [Source:MGI Symbol;Acc:MGI:1891700]	16782	0.288289	0.625832	0.533647	0.964703	Increase	nonDE	0.394728	0.761124	0.449373	0.929586	Increase	nonDE	-0.33651	-0.768185	0.445198	0.81855	Decrease	nonDE	1.01953	2.02892	0.0466233	0.659766	Increase	nonDE	0.0106391	0.0245644	0.980479	0.999557	Increase	nonDE	-0.0349128	-0.0762414	0.939464	0.999888	Decrease	nonDE	-0.100891	-0.212999	0.832004	0.93053	Decrease
508	ENSMUSG00000003464	1	171954322	171964060	Pex19	Pex19	peroxisomal biogenesis factor 19 [Source:MGI Symbol;Acc:MGI:1334458]	9738	0.0604485	0.552848	0.58229	0.973503	Increase	nonDE	0.048688	0.423867	0.673081	0.963347	Increase	nonDE	0.0990354	0.862221	0.391779	0.794994	Increase	nonDE	0.0101011	0.0834413	0.933761	0.983683	Increase	nonDE	-0.132264	-1.25099	0.215485	0.999557	Decrease	nonDE	0.00715288	0.0648572	0.948489	0.999888	Increase	nonDE	-0.342764	-3.0831	0.00301961	0.0866932	Decrease
509	ENSMUSG00000003469	14	70694916	70706272	Phyhip	Phyhip	phytanoyl-CoA hydroxylase interacting protein [Source:MGI Symbol;Acc:MGI:1860417]	11356	0.22614	1.29199	0.200996	0.914925	Increase	nonDE	-0.170368	-0.933804	0.353908	0.913747	Decrease	nonDE	0.435939	2.34028	0.0223933	0.49585	Increase	nonDE	-0.380167	-1.95225	0.0552775	0.659766	Decrease	nonDE	0.00316971	0.0204469	0.98375	0.999557	Increase	nonDE	0.283859	1.69751	0.0944501	0.847967	Increase	nonDE	0.450969	2.62127	0.0109278	0.138136	Increase
510	ENSMUSG00000003477	6	55147611	55152028	Inmt	Inmt	indolethylamine N-methyltransferase [Source:MGI Symbol;Acc:MGI:102963]	4417	-0.700821	-1.19124	0.237951	0.919545	Decrease	nonDE	-0.131824	-0.224551	0.823043	0.983804	Decrease	nonDE	-0.461122	-0.750077	0.455952	0.823557	Decrease	nonDE	-0.371523	-0.600644	0.550195	0.863004	Decrease	nonDE	0.0279899	0.0489098	0.961143	0.999557	Increase	nonDE	-0.291314	-0.494671	0.622523	0.98827	Decrease	nonDE	-0.083317	-0.139516	0.88948	0.955112	Decrease
511	ENSMUSG00000003500	6	29200433	29216363	Impdh1	Impdh1	inosine monophosphate dehydrogenase 1 [Source:MGI Symbol;Acc:MGI:96567]	15930	0.0538525	0.232502	0.816889	0.989901	Increase	nonDE	-0.20665	-0.874948	0.384868	0.916342	Decrease	nonDE	0.163231	0.658498	0.512576	0.851745	Increase	nonDE	-0.316029	-1.24379	0.218107	0.716066	Decrease	nonDE	0.356034	1.79188	0.0778701	0.999557	Increase	nonDE	-0.351375	-1.65783	0.102237	0.851234	Decrease	nonDE	0.344897	1.56381	0.122784	0.385312	Increase
512	ENSMUSG00000003518	11	101861969	101877839	Dusp3	Dusp3	dual specificity phosphatase 3 (vaccinia virus phosphatase VH1-related) [Source:MGI Symbol;Acc:MGI:1919599]	15870	0.112187	0.991283	0.325274	0.932818	Increase	nonDE	-0.319848	-2.76409	0.00744365	0.857116	Decrease	nonDE	-0.0219511	-0.188355	0.851193	0.963739	Decrease	nonDE	-0.18571	-1.54802	0.12654	0.674283	Decrease	nonDE	-0.0891767	-0.862145	0.391821	0.999557	Decrease	nonDE	0.0161727	0.149355	0.881743	0.995883	Increase	nonDE	0.286709	2.49984	0.0149939	0.155928	Increase
513	ENSMUSG00000003526	16	17878221	17908067	Prodh	Prodh	proline dehydrogenase [Source:MGI Symbol;Acc:MGI:97770]	29846	0.0336304	0.0963634	0.923532	0.994512	Increase	nonDE	-0.125799	-0.353504	0.72487	0.970323	Decrease	nonDE	0.281127	0.739165	0.462504	0.827605	Increase	nonDE	-0.373296	-0.958251	0.341535	0.771209	Decrease	nonDE	-0.0452432	-0.150806	0.880602	0.999557	Decrease	nonDE	0.552205	1.59713	0.115154	0.865278	Increase	nonDE	-0.0909225	-0.272953	0.785767	0.909383	Decrease
514	ENSMUSG00000003527	16	17718573	17729212	Ess2	Ess2	ess-2 splicing factor [Source:MGI Symbol;Acc:MGI:107854]	10639	0.216658	0.646355	0.520357	0.962951	Increase	nonDE	0.110152	0.300481	0.764782	0.976695	Increase	nonDE	0.587233	1.56861	0.121661	0.638809	Increase	nonDE	-0.260422	-0.642196	0.523035	0.853936	Decrease	nonDE	0.148489	0.529648	0.598185	0.999557	Increase	nonDE	0.187443	0.593845	0.554705	0.983222	Increase	nonDE	0.781684	2.16687	0.0339668	0.219856	Increase
515	ENSMUSG00000003528	16	17743087	17746083	Slc25a1	Slc25a1	solute carrier family 25 (mitochondrial carrier, citrate transporter), member 1 [Source:MGI Symbol;Acc:MGI:1345283]	2996	-0.0104893	-0.0488479	0.961192	0.995525	Decrease	nonDE	-0.207457	-0.951292	0.345029	0.913262	Decrease	nonDE	-0.319587	-1.47408	0.145354	0.657747	Decrease	nonDE	0.10164	0.45798	0.648515	0.900449	Increase	nonDE	0.053697	0.275314	0.78396	0.999557	Increase	nonDE	-0.342633	-1.72134	0.0900102	0.84035	Decrease	nonDE	0.131888	0.598672	0.551501	0.773169	Increase
516	ENSMUSG00000003531	16	17870724	17889496	Dgcr6	Dgcr6	DiGeorge syndrome critical region gene 6 [Source:MGI Symbol;Acc:MGI:1202877]	18772	-0.202776	-1.0912	0.279267	0.920945	Decrease	nonDE	0.161602	0.827038	0.411283	0.924196	Increase	nonDE	0.0358109	0.177213	0.8599	0.966697	Increase	nonDE	-0.0769854	-0.362315	0.718308	0.922895	Decrease	nonDE	-0.199277	-1.09689	0.27679	0.999557	Decrease	nonDE	-0.323717	-1.77782	0.0801752	0.834439	Decrease	nonDE	-0.511817	-2.68235	0.00928752	0.129105	Decrease
517	ENSMUSG00000003534	17	35992459	36015513	Ddr1	Ddr1	discoidin domain receptor family, member 1 [Source:MGI Symbol;Acc:MGI:99216]	23054	-0.21689	-1.69261	0.0953841	0.914925	Decrease	nonDE	0.0150061	0.114349	0.909318	0.990727	Increase	nonDE	-0.212798	-1.594	0.115853	0.632287	Decrease	nonDE	0.0109149	0.0793501	0.937001	0.984382	Increase	nonDE	-0.0245159	-0.19626	0.845028	0.999557	Decrease	nonDE	-0.32359	-2.53686	0.0136291	0.721732	Decrease	nonDE	-0.360605	-2.78002	0.00712599	0.119167	Decrease
518	ENSMUSG00000003541	17	36132576	36133815	Ier3	Ier3	immediate early response 3 [Source:MGI Symbol;Acc:MGI:104814]	1239	-0.0294897	-0.153487	0.878496	0.993282	Decrease	nonDE	-0.058437	-0.291901	0.771305	0.976804	Decrease	nonDE	-0.109107	-0.547602	0.585866	0.875567	Decrease	nonDE	0.02118	0.101508	0.919464	0.978488	Increase	nonDE	-0.195424	-1.09601	0.277175	0.999557	Decrease	nonDE	-0.142935	-0.784403	0.435692	0.973027	Decrease	nonDE	-0.0396491	-0.200429	0.841779	0.935705	Decrease
519	ENSMUSG00000003545	7	19036621	19043976	Fosb	Fosb	FBJ osteosarcoma oncogene B [Source:MGI Symbol;Acc:MGI:95575]	7355	0.119084	0.228772	0.819774	0.989901	Increase	nonDE	-0.32811	-0.615137	0.540641	0.939559	Decrease	nonDE	-0.662298	-1.26753	0.209549	0.694378	Decrease	nonDE	0.453272	0.839805	0.404138	0.80404	Increase	nonDE	0.794947	1.54715	0.126749	0.999557	Increase	nonDE	-0.99148	-1.87426	0.0654521	0.815914	Decrease	nonDE	0.00468348	0.00895605	0.992882	0.997437	Increase
520	ENSMUSG00000003546	17	46941550	46956948	Klc4	Klc4	kinesin light chain 4 [Source:MGI Symbol;Acc:MGI:1922014]	15398	-0.0376256	-0.214441	0.830883	0.98991	Decrease	nonDE	-0.0665931	-0.366465	0.715225	0.969344	Decrease	nonDE	-0.165427	-0.905396	0.368645	0.78667	Decrease	nonDE	0.0612084	0.321793	0.748656	0.933061	Increase	nonDE	-0.0396632	-0.253279	0.800863	0.999557	Decrease	nonDE	-0.105653	-0.646415	0.520317	0.979776	Decrease	nonDE	-0.0168987	-0.0978207	0.92238	0.969457	Decrease
521	ENSMUSG00000003549	7	19078703	19090449	Ercc1	Ercc1	excision repair cross-complementing rodent repair deficiency, complementation group 1 [Source:MGI Symbol;Acc:MGI:95412]	11746	0.584338	1.7013	0.0937322	0.914925	Increase	nonDE	-0.0179916	-0.0469448	0.962703	0.997115	Decrease	nonDE	0.610696	1.68238	0.0973602	0.612848	Increase	nonDE	-0.0443503	-0.109859	0.912864	0.976894	Decrease	nonDE	-0.0894647	-0.268309	0.789322	0.999557	Decrease	nonDE	-0.223973	-0.660694	0.511176	0.979776	Decrease	nonDE	-0.489994	-1.4331	0.156687	0.431798	Decrease
522	ENSMUSG00000003559	19	46695897	46729538	As3mt	As3mt	arsenite methyltransferase [Source:MGI Symbol;Acc:MGI:1929882]	33641	-0.198886	-0.452999	0.652079	0.975937	Decrease	nonDE	0.401581	0.855456	0.395484	0.917357	Increase	nonDE	-0.467613	-1.03329	0.305348	0.757023	Decrease	nonDE	0.670308	1.37981	0.172439	0.695361	Increase	nonDE	0.684021	1.58138	0.118711	0.999557	Increase	nonDE	-0.42948	-0.921574	0.360205	0.956581	Decrease	nonDE	-0.00035785	-0.000831365	0.999339	0.999791	Decrease
523	ENSMUSG00000003573	8	70735477	70747011	Homer3	Homer3	homer scaffolding protein 3 [Source:MGI Symbol;Acc:MGI:1347359]	11534	-0.0840692	-0.473063	0.637775	0.975135	Decrease	nonDE	-0.0850822	-0.465083	0.643448	0.959377	Decrease	nonDE	0.113524	0.599691	0.550826	0.864067	Increase	nonDE	-0.282675	-1.4443	0.153524	0.687976	Decrease	nonDE	-0.116662	-0.714224	0.477681	0.999557	Decrease	nonDE	0.00615619	0.0360327	0.971368	0.999888	Increase	nonDE	0.0030026	0.0170167	0.986476	0.995302	Increase
524	ENSMUSG00000003575	8	70835005	70892229	Crtc1	Crtc1	CREB regulated transcription coactivator 1 [Source:MGI Symbol;Acc:MGI:2142523]	57224	0.0540651	0.343161	0.7326	0.986466	Increase	nonDE	-0.0191698	-0.116445	0.907664	0.990566	Decrease	nonDE	0.0354044	0.214375	0.830935	0.958673	Increase	nonDE	-0.000509081	-0.00293855	0.997664	0.999382	Decrease	nonDE	0.175932	1.31501	0.193191	0.999557	Increase	nonDE	0.304748	2.02424	0.0471154	0.784556	Increase	nonDE	0.411444	2.71626	0.00847707	0.125532	Increase
525	ENSMUSG00000003581	11	4085202	4091172	Rnf215	Rnf215	ring finger protein 215 [Source:MGI Symbol;Acc:MGI:1918923]	5970	0.309419	1.7402	0.0866208	0.914925	Increase	nonDE	-0.022806	-0.119031	0.905623	0.990157	Decrease	nonDE	0.0575221	0.319475	0.750405	0.936353	Increase	nonDE	0.229091	1.17377	0.244829	0.726847	Increase	nonDE	0.000287997	0.00191894	0.998475	0.99963	Increase	nonDE	0.226958	1.37245	0.174704	0.899859	Increase	nonDE	0.583551	3.19959	0.00214044	0.075741	Increase
526	ENSMUSG00000003585	11	4047039	4073415	Sec14l2	Sec14l2	SEC14-like lipid binding 2 [Source:MGI Symbol;Acc:MGI:1915065]	26376	-0.228399	-0.708109	0.481444	0.959726	Decrease	nonDE	-0.258903	-0.814454	0.418399	0.924801	Decrease	nonDE	-0.188442	-0.554815	0.580952	0.873062	Decrease	nonDE	-0.298859	-0.884349	0.379812	0.795554	Decrease	nonDE	0.0200482	0.063259	0.949757	0.999557	Increase	nonDE	-0.530855	-1.69114	0.0956657	0.849523	Decrease	nonDE	0.192949	0.520398	0.604579	0.808076	Increase
527	ENSMUSG00000003604	2	112323309	112464918	Aven	Aven	apoptosis, caspase activation inhibitor [Source:MGI Symbol;Acc:MGI:1921518]	141609	-0.225542	-1.24962	0.21598	0.914925	Decrease	nonDE	0.174631	0.930819	0.355439	0.913747	Increase	nonDE	-0.273914	-1.45523	0.150485	0.663695	Decrease	nonDE	0.223003	1.13433	0.260878	0.73876	Increase	nonDE	0.166785	0.976644	0.332416	0.999557	Increase	nonDE	-0.196632	-1.08863	0.280392	0.939087	Decrease	nonDE	-0.0262183	-0.145958	0.884413	0.953592	Decrease
528	ENSMUSG00000003617	3	20011218	20063309	Cp	Cp	ceruloplasmin [Source:MGI Symbol;Acc:MGI:88476]	52091	0.33577	1.65943	0.101912	0.914925	Increase	nonDE	-0.487586	-2.35294	0.0217047	0.857116	Decrease	nonDE	0.19399	0.924318	0.358786	0.782005	Increase	nonDE	-0.345806	-1.59893	0.114752	0.674283	Decrease	nonDE	0.154765	0.870634	0.387202	0.999557	Increase	nonDE	-0.0962654	-0.505944	0.614631	0.986248	Decrease	nonDE	0.576335	2.75384	0.00765473	0.122574	Increase
529	ENSMUSG00000003623	5	9016033	9047324	Crot	Crot	carnitine O-octanoyltransferase [Source:MGI Symbol;Acc:MGI:1921364]	31291	0.0214866	0.138317	0.890423	0.994099	Increase	nonDE	-0.0191622	-0.118392	0.906127	0.990157	Decrease	nonDE	0.134625	0.80935	0.421307	0.807955	Increase	nonDE	-0.1323	-0.761473	0.449166	0.822455	Decrease	nonDE	0.0130592	0.0917382	0.927192	0.999557	Increase	nonDE	0.0937242	0.612811	0.542169	0.98123	Increase	nonDE	-0.106657	-0.70664	0.48235	0.727275	Decrease
530	ENSMUSG00000003644	4	133574601	133615108	Rps6ka1	Rps6ka1	ribosomal protein S6 kinase polypeptide 1 [Source:MGI Symbol;Acc:MGI:104558]	40507	0.0601671	0.358135	0.721419	0.986466	Increase	nonDE	0.138631	0.769378	0.444494	0.929096	Increase	nonDE	0.337742	1.80593	0.0756236	0.588292	Increase	nonDE	-0.138943	-0.696632	0.488551	0.839281	Decrease	nonDE	0.184247	1.21193	0.229988	0.999557	Increase	nonDE	0.0543481	0.326065	0.745437	0.992561	Increase	nonDE	0.119658	0.727356	0.469655	0.719316	Increase
531	ENSMUSG00000003657	8	110864134	110894842	Calb2	Calb2	calbindin 2 [Source:MGI Symbol;Acc:MGI:101914]	30708	0.0806266	0.844887	0.401316	0.947731	Increase	nonDE	0.0268354	0.267951	0.789597	0.979358	Increase	nonDE	0.202196	2.01031	0.0486085	0.551971	Increase	nonDE	-0.0947343	-0.894772	0.374256	0.791996	Decrease	nonDE	-0.0123043	-0.139542	0.889459	0.999557	Decrease	nonDE	-0.0500522	-0.54243	0.589402	0.983463	Decrease	nonDE	-0.09685	-1.03699	0.303633	0.5863	Decrease
532	ENSMUSG00000003660	2	127050306	127082371	Snrnp200	Snrnp200	small nuclear ribonucleoprotein 200 (U5) [Source:MGI Symbol;Acc:MGI:2444401]	32065	0.148992	1.38418	0.171103	0.914925	Increase	nonDE	-0.0301866	-0.267209	0.790166	0.979525	Decrease	nonDE	0.269288	2.35904	0.02138	0.493144	Increase	nonDE	-0.150483	-1.253	0.214756	0.714926	Decrease	nonDE	0.0512437	0.514926	0.608375	0.999557	Increase	nonDE	0.0638212	0.603423	0.548356	0.982702	Increase	nonDE	0.11996	1.117	0.268161	0.552587	Increase
533	ENSMUSG00000003662	2	127082858	127089736	Ciao1	Ciao1	cytosolic iron-sulfur protein assembly 1 [Source:MGI Symbol;Acc:MGI:1346998]	6878	-0.0202533	-0.0990784	0.921385	0.994099	Decrease	nonDE	0.0284794	0.13289	0.894696	0.988364	Increase	nonDE	-0.257551	-1.23864	0.219994	0.701742	Decrease	nonDE	0.265777	1.21144	0.230173	0.720361	Increase	nonDE	-0.0823256	-0.418627	0.676887	0.999557	Decrease	nonDE	0.0781503	0.37483	0.709024	0.992561	Increase	nonDE	-0.359556	-1.72955	0.0885228	0.331718	Decrease
534	ENSMUSG00000003665	17	18063585	18075467	Has1	Has1	hyaluronan synthase 1 [Source:MGI Symbol;Acc:MGI:106590]	11882	-0.688627	-1.34948	0.182418	0.914925	Decrease	nonDE	0.0197375	0.0380138	0.969807	0.997115	Increase	nonDE	-0.753406	-1.43142	0.157666	0.668887	Decrease	nonDE	0.0845162	0.15671	0.876016	0.966425	Increase	nonDE	-0.464876	-0.915729	0.363593	0.999557	Decrease	nonDE	0.685724	1.30537	0.196912	0.907205	Increase	nonDE	-1.07915	-2.07619	0.042309	0.239922	Decrease
535	ENSMUSG00000003680	19	8751851	8763781	Taf6l	Taf6l	TATA-box binding protein associated factor 6 like [Source:MGI Symbol;Acc:MGI:2444957]	11930	0.10767	0.443251	0.659076	0.976975	Increase	nonDE	-0.154073	-0.613979	0.541401	0.939771	Decrease	nonDE	-0.292213	-1.24195	0.21878	0.701394	Decrease	nonDE	0.245811	1.00078	0.320696	0.762661	Increase	nonDE	0.144431	0.667953	0.506561	0.999557	Increase	nonDE	-0.0113749	-0.0482743	0.961648	0.999888	Decrease	nonDE	0.00317024	0.0135311	0.989246	0.995939	Increase
536	ENSMUSG00000003721	1	121232082	121260318	Insig2	Insig2	insulin induced gene 2 [Source:MGI Symbol;Acc:MGI:1920249]	28236	-0.00249227	-0.021181	0.983167	0.997005	Decrease	nonDE	0.160043	1.28973	0.201776	0.883214	Increase	nonDE	0.0347229	0.281925	0.778909	0.946656	Increase	nonDE	0.122828	0.942584	0.349432	0.775185	Increase	nonDE	0.118644	1.0825	0.283087	0.999557	Increase	nonDE	0.0013612	0.0117042	0.990698	0.999888	Increase	nonDE	0.125663	1.06967	0.288779	0.571544	Increase
537	ENSMUSG00000003731	4	129537773	129566560	Kpna6	Kpna6	karyopherin (importin) alpha 6 [Source:MGI Symbol;Acc:MGI:1100836]	28787	0.0346973	0.20735	0.836393	0.990197	Increase	nonDE	0.123788	0.689702	0.492871	0.933424	Increase	nonDE	0.017592	0.100501	0.92026	0.980908	Increase	nonDE	0.140893	0.749043	0.456571	0.82413	Increase	nonDE	0.181412	1.2435	0.218211	0.999557	Increase	nonDE	0.088597	0.553298	0.581984	0.983222	Increase	nonDE	0.218316	1.35424	0.180412	0.459037	Increase
538	ENSMUSG00000003746	10	53780881	53952705	Man1a	Man1a	mannosidase 1, alpha [Source:MGI Symbol;Acc:MGI:104677]	171824	-0.224618	-0.748108	0.45713	0.956403	Decrease	nonDE	0.256702	0.81629	0.417357	0.924801	Increase	nonDE	-0.332487	-1.0479	0.29862	0.753469	Decrease	nonDE	0.36457	1.09375	0.278157	0.748171	Increase	nonDE	0.0881729	0.314941	0.753829	0.999557	Increase	nonDE	-0.0601982	-0.202373	0.840266	0.99575	Decrease	nonDE	-0.210291	-0.709122	0.480819	0.726091	Decrease
539	ENSMUSG00000003752	7	26906597	26928086	Itpkc	Itpkc	inositol 1,4,5-trisphosphate 3-kinase C [Source:MGI Symbol;Acc:MGI:2442554]	21489	0.0479576	0.179563	0.858062	0.992818	Increase	nonDE	0.0477591	0.168972	0.866351	0.986868	Increase	nonDE	0.300102	1.02907	0.307314	0.757911	Increase	nonDE	-0.204385	-0.66318	0.509593	0.847992	Decrease	nonDE	0.0633562	0.279483	0.780773	0.999557	Increase	nonDE	0.302426	1.15043	0.254239	0.927393	Increase	nonDE	0.418814	1.55249	0.125467	0.389684	Increase
540	ENSMUSG00000003762	7	26932448	26957375	Coq8b	Coq8b	coenzyme Q8B [Source:MGI Symbol;Acc:MGI:1924139]	24927	-0.081729	-0.285395	0.776262	0.986803	Decrease	nonDE	0.124368	0.40722	0.685202	0.965182	Increase	nonDE	-0.0434139	-0.138969	0.88991	0.973006	Decrease	nonDE	0.0860527	0.258917	0.796529	0.94796	Increase	nonDE	-0.0792623	-0.266228	0.790918	0.999557	Decrease	nonDE	0.0395532	0.124077	0.901642	0.997348	Increase	nonDE	-0.284309	-0.923556	0.35918	0.636755	Decrease
541	ENSMUSG00000003778	18	34731668	34757654	Brd8	Brd8	bromodomain containing 8 [Source:MGI Symbol;Acc:MGI:1925906]	25986	-0.0441312	-0.384204	0.702099	0.98483	Decrease	nonDE	0.235684	1.9351	0.057391	0.857116	Increase	nonDE	0.0881341	0.723919	0.471748	0.83079	Increase	nonDE	0.103419	0.799987	0.426672	0.812815	Increase	nonDE	-0.114774	-1.03739	0.30345	0.999557	Decrease	nonDE	0.13305	1.14082	0.258189	0.928394	Increase	nonDE	-0.186016	-1.58777	0.117257	0.376456	Decrease
542	ENSMUSG00000003808	8	85583618	85595886	Farsa	Farsa	phenylalanyl-tRNA synthetase, alpha subunit [Source:MGI Symbol;Acc:MGI:1913840]	12268	-0.290143	-1.92436	0.0587494	0.914925	Decrease	nonDE	0.150489	0.967459	0.33695	0.911131	Increase	nonDE	-0.00767796	-0.0476578	0.962137	0.99176	Decrease	nonDE	-0.131976	-0.790943	0.431893	0.815362	Decrease	nonDE	-0.221257	-1.54078	0.128291	0.999557	Decrease	nonDE	0.0282806	0.189768	0.850091	0.995883	Increase	nonDE	-0.293722	-1.93684	0.0571734	0.273017	Decrease
543	ENSMUSG00000003809	8	85613022	85620550	Gcdh	Gcdh	glutaryl-Coenzyme A dehydrogenase [Source:MGI Symbol;Acc:MGI:104541]	7528	-0.262498	-1.0425	0.301094	0.924765	Decrease	nonDE	0.38181	1.40628	0.16447	0.870272	Increase	nonDE	-0.350409	-1.35536	0.180059	0.6833	Decrease	nonDE	0.469721	1.67821	0.0981733	0.667737	Increase	nonDE	-0.381634	-1.54045	0.128372	0.999557	Decrease	nonDE	-0.124839	-0.506281	0.614396	0.986248	Decrease	nonDE	-0.664419	-2.54247	0.0134326	0.149918	Decrease
544	ENSMUSG00000003810	4	116163959	116321380	Mast2	Mast2	microtubule associated serine/threonine kinase 2 [Source:MGI Symbol;Acc:MGI:894676]	157421	0.352402	1.06769	0.289663	0.924234	Increase	nonDE	-0.271481	-0.789858	0.432522	0.925723	Decrease	nonDE	0.304304	0.894092	0.374616	0.788624	Increase	nonDE	-0.223383	-0.626848	0.532985	0.857129	Decrease	nonDE	0.128224	0.499692	0.619003	0.999557	Increase	nonDE	0.0259614	0.0922563	0.926782	0.999888	Increase	nonDE	0.421775	1.3924	0.168613	0.446235	Increase
545	ENSMUSG00000003812	8	85635189	85649544	Dnase2a	Dnase2a	deoxyribonuclease II alpha [Source:MGI Symbol;Acc:MGI:1329019]	14355	0.113212	0.35629	0.722793	0.986466	Increase	nonDE	0.40764	1.11876	0.267416	0.898505	Increase	nonDE	0.0652043	0.192757	0.847759	0.962313	Increase	nonDE	0.455648	1.18324	0.241081	0.725511	Increase	nonDE	0.289013	0.94896	0.346204	0.999557	Increase	nonDE	-0.370755	-1.13654	0.259959	0.928394	Decrease	nonDE	0.589911	1.63027	0.107948	0.362606	Increase
546	ENSMUSG00000003813	8	85560648	85567294	Rad23a	Rad23a	RAD23 homolog A, nucleotide excision repair protein [Source:MGI Symbol;Acc:MGI:105126]	6646	-0.0583944	-0.358711	0.720989	0.986466	Decrease	nonDE	-0.140118	-0.844098	0.401753	0.919721	Decrease	nonDE	0.0258802	0.150383	0.880934	0.970602	Increase	nonDE	-0.224392	-1.27133	0.208205	0.710712	Decrease	nonDE	-0.0213012	-0.149198	0.881866	0.999557	Decrease	nonDE	0.107416	0.705291	0.483183	0.975723	Increase	nonDE	0.371949	2.30396	0.0244757	0.189088	Increase
547	ENSMUSG00000003814	8	85568479	85573563	Calr	Calr	calreticulin [Source:MGI Symbol;Acc:MGI:88252]	5084	0.220697	1.4686	0.146831	0.914925	Increase	nonDE	-0.329607	-2.13004	0.0370114	0.857116	Decrease	nonDE	0.177995	1.13933	0.258804	0.729129	Increase	nonDE	-0.286906	-1.77328	0.0809317	0.661738	Decrease	nonDE	0.130087	0.944663	0.348377	0.999557	Increase	nonDE	-0.184875	-1.28534	0.203296	0.909037	Decrease	nonDE	0.570734	3.71377	0.000430081	0.0411537	Increase
548	ENSMUSG00000003824	8	85598740	85614850	Syce2	Syce2	synaptonemal complex central element protein 2 [Source:MGI Symbol;Acc:MGI:1919096]	16110	0.314498	0.761754	0.449	0.955557	Increase	nonDE	0.110602	0.240056	0.811052	0.982552	Increase	nonDE	0.0831511	0.196147	0.845116	0.961393	Increase	nonDE	0.341949	0.721192	0.473413	0.83332	Increase	nonDE	-0.268518	-0.646893	0.52001	0.999557	Decrease	nonDE	-0.321745	-0.783702	0.4361	0.973027	Decrease	nonDE	-1.08778	-2.64887	0.0101564	0.134307	Decrease
549	ENSMUSG00000003847	8	108020102	108106149	Nfat5	Nfat5	nuclear factor of activated T cells 5 [Source:MGI Symbol;Acc:MGI:1859333]	86047	0.0216955	0.134263	0.893615	0.994099	Increase	nonDE	0.255143	1.48183	0.143283	0.866234	Increase	nonDE	0.112586	0.659138	0.512167	0.851657	Increase	nonDE	0.164252	0.901371	0.370765	0.789483	Increase	nonDE	0.247341	1.68137	0.0975556	0.999557	Increase	nonDE	0.232428	1.43984	0.154776	0.89229	Increase	nonDE	0.425915	2.62781	0.0107404	0.13737	Increase
550	ENSMUSG00000003848	8	108139118	108151683	Nob1	Nob1	NIN1/RPN12 binding protein 1 homolog [Source:MGI Symbol;Acc:MGI:1914869]	12565	-0.698426	-1.50641	0.136873	0.914925	Decrease	nonDE	-0.109868	-0.252677	0.801326	0.980216	Decrease	nonDE	-0.763743	-1.59737	0.1151	0.630636	Decrease	nonDE	-0.0445511	-0.0980938	0.922164	0.979725	Decrease	nonDE	0.110121	0.229576	0.819152	0.999557	Increase	nonDE	-0.446679	-0.923081	0.359426	0.956581	Decrease	nonDE	-0.596114	-1.21961	0.22708	0.510903	Decrease
551	ENSMUSG00000003849	8	108114857	108129838	Nqo1	Nqo1	NAD(P)H dehydrogenase, quinone 1 [Source:MGI Symbol;Acc:MGI:103187]	14981	-0.151471	-0.350505	0.727109	0.986466	Decrease	nonDE	-0.281196	-0.650624	0.517614	0.937012	Decrease	nonDE	-0.803617	-1.94007	0.0567721	0.564776	Decrease	nonDE	0.37095	0.887537	0.378107	0.794703	Increase	nonDE	-0.0762332	-0.189727	0.850122	0.999557	Decrease	nonDE	-0.233257	-0.559099	0.578042	0.983222	Decrease	nonDE	-0.710078	-1.73582	0.0873983	0.32981	Decrease
552	ENSMUSG00000003863	7	44988546	45016443	Ppfia3	Ppfia3	protein tyrosine phosphatase, receptor type, f polypeptide (PTPRF), interacting protein (liprin), alpha 3 [Source:MGI Symbol;Acc:MGI:1924037]	27897	0.265603	1.38205	0.171754	0.914925	Increase	nonDE	-0.205385	-1.02469	0.309359	0.907555	Decrease	nonDE	0.303196	1.50413	0.137457	0.651407	Increase	nonDE	-0.242979	-1.15117	0.253937	0.732339	Decrease	nonDE	-0.110628	-0.648987	0.518664	0.999557	Decrease	nonDE	0.0638095	0.355051	0.723717	0.992561	Increase	nonDE	0.162295	0.848779	0.399162	0.669166	Increase
553	ENSMUSG00000003865	7	45084268	45106043	Gys1	Gys1	glycogen synthase 1, muscle [Source:MGI Symbol;Acc:MGI:101805]	21775	0.843715	2.52326	0.0141169	0.914925	Increase	nonDE	-0.62239	-1.73935	0.0867715	0.857116	Decrease	nonDE	0.0540786	0.174285	0.86219	0.967209	Increase	nonDE	0.167246	0.494537	0.622617	0.890401	Increase	nonDE	-0.0753218	-0.308699	0.758551	0.999557	Decrease	nonDE	0.391509	1.41182	0.162838	0.892423	Increase	nonDE	0.381375	1.32048	0.191369	0.471889	Increase
554	ENSMUSG00000003868	7	45071184	45087520	Ruvbl2	Ruvbl2	RuvB-like protein 2 [Source:MGI Symbol;Acc:MGI:1342299]	16336	-0.218818	-0.515599	0.607908	0.974472	Decrease	nonDE	-0.353857	-0.854178	0.396187	0.917525	Decrease	nonDE	-0.239996	-0.548914	0.584971	0.875395	Decrease	nonDE	-0.332679	-0.771892	0.443014	0.820661	Decrease	nonDE	-0.0330735	-0.090167	0.928436	0.999557	Decrease	nonDE	0.405802	0.983625	0.328997	0.950337	Increase	nonDE	-0.395834	-1.03746	0.303419	0.58614	Decrease
555	ENSMUSG00000003872	7	45017315	45020007	Lin7b	Lin7b	lin-7 homolog B, crumbs cell polarity complex component [Source:MGI Symbol;Acc:MGI:1330858]	2692	-0.429251	-1.69743	0.0944653	0.914925	Decrease	nonDE	-0.165031	-0.681136	0.498238	0.934499	Decrease	nonDE	-0.451539	-1.73098	0.0882644	0.603379	Decrease	nonDE	-0.142742	-0.564772	0.5742	0.871341	Decrease	nonDE	-0.104839	-0.450715	0.653715	0.999557	Decrease	nonDE	-0.163529	-0.681475	0.498025	0.977709	Decrease	nonDE	-0.271383	-1.08614	0.281483	0.564332	Decrease
556	ENSMUSG00000003873	7	45111121	45116322	Bax	Bax	BCL2-associated X protein [Source:MGI Symbol;Acc:MGI:99702]	5201	-0.275404	-0.84609	0.400649	0.947453	Decrease	nonDE	0.632312	1.74608	0.0855862	0.857116	Increase	nonDE	0.239408	0.647227	0.519795	0.854434	Increase	nonDE	0.1175	0.289924	0.77281	0.940648	Increase	nonDE	0.0802918	0.286498	0.775421	0.999557	Increase	nonDE	0.463829	1.41308	0.162468	0.892423	Increase	nonDE	0.301865	0.93528	0.353153	0.631392	Increase
557	ENSMUSG00000003882	15	9505874	9530262	Il7r	Il7r	interleukin 7 receptor [Source:MGI Symbol;Acc:MGI:96562]	24388	-1.22976	-2.2995	0.0247433	0.914925	Decrease	nonDE	1.13312	2.05268	0.0441896	0.857116	Increase	nonDE	-1.01946	-1.8311	0.0717323	0.581864	Decrease	nonDE	0.922826	1.59704	0.115175	0.674283	Increase	nonDE	-0.646928	-1.20518	0.232563	0.999557	Decrease	nonDE	0.156059	0.284449	0.776983	0.992561	Increase	nonDE	-0.778181	-1.39715	0.167184	0.44466	Decrease
558	ENSMUSG00000003923	10	71061294	71074110	Tfam	Tfam	transcription factor A, mitochondrial [Source:MGI Symbol;Acc:MGI:107810]	12816	0.0214567	0.200891	0.84142	0.990289	Increase	nonDE	-0.0317559	-0.285372	0.776279	0.977608	Decrease	nonDE	0.00246025	0.0220386	0.982486	0.997621	Increase	nonDE	-0.0127594	-0.109223	0.913367	0.976974	Decrease	nonDE	0.0454689	0.451526	0.653134	0.999557	Increase	nonDE	-0.0541803	-0.510693	0.61132	0.985403	Decrease	nonDE	-0.207228	-1.95993	0.0543535	0.266525	Decrease
559	ENSMUSG00000003929	17	33548316	33577852	Zfp81	Zfp81	zinc finger protein 81 [Source:MGI Symbol;Acc:MGI:1890752]	29536	-0.117665	-0.689511	0.49299	0.960724	Decrease	nonDE	0.0657701	0.370147	0.712493	0.968947	Increase	nonDE	0.37854	1.98901	0.0509705	0.554772	Increase	nonDE	-0.430435	-2.173	0.0334818	0.659766	Decrease	nonDE	-0.126602	-0.813389	0.419005	0.999557	Decrease	nonDE	-0.0961572	-0.595365	0.553695	0.983222	Decrease	nonDE	-0.0864946	-0.514297	0.608813	0.810206	Decrease
560	ENSMUSG00000003934	11	69444918	69451031	Efnb3	Efnb3	ephrin B3 [Source:MGI Symbol;Acc:MGI:109196]	6113	-0.120886	-0.604241	0.547815	0.966022	Decrease	nonDE	-0.130048	-0.645103	0.521162	0.937012	Decrease	nonDE	-0.45497	-2.26591	0.0268406	0.512705	Decrease	nonDE	0.204036	1.00012	0.321011	0.762661	Increase	nonDE	0.137101	0.719323	0.474555	0.999557	Increase	nonDE	-0.133619	-0.662593	0.509966	0.979776	Decrease	nonDE	-0.160325	-0.797124	0.428321	0.690303	Decrease
561	ENSMUSG00000003948	11	90140282	90169415	Mmd	Mmd	monocyte to macrophage differentiation-associated [Source:MGI Symbol;Acc:MGI:1914718]	29133	0.131615	0.95758	0.341872	0.938646	Increase	nonDE	0.0925349	0.626972	0.532904	0.937716	Increase	nonDE	-0.0128937	-0.0918905	0.927071	0.983312	Decrease	nonDE	0.237043	1.5654	0.122411	0.674283	Increase	nonDE	0.201055	1.52623	0.131871	0.999557	Increase	nonDE	0.0640029	0.445633	0.657364	0.989624	Increase	nonDE	-0.0308303	-0.220397	0.826262	0.927655	Decrease
562	ENSMUSG00000003949	11	90227362	90281721	Hlf	Hlf	hepatic leukemia factor [Source:MGI Symbol;Acc:MGI:96108]	54359	0.0620239	0.500156	0.618678	0.974913	Increase	nonDE	-0.0410566	-0.318516	0.751129	0.975541	Decrease	nonDE	-0.0441038	-0.345507	0.730844	0.929456	Decrease	nonDE	0.0650712	0.487594	0.6275	0.892199	Increase	nonDE	0.151662	1.30453	0.196715	0.999557	Increase	nonDE	-0.0577479	-0.470194	0.639812	0.98961	Decrease	nonDE	0.0952617	0.76911	0.444652	0.701456	Increase
563	ENSMUSG00000003955	16	35864131	35891964	Fam162a	Fam162a	family with sequence similarity 162, member A [Source:MGI Symbol;Acc:MGI:1917436]	27833	-0.216712	-1.38937	0.169526	0.914925	Decrease	nonDE	0.431739	2.57591	0.0123121	0.857116	Increase	nonDE	-0.0749917	-0.44868	0.655176	0.90329	Decrease	nonDE	0.290019	1.61697	0.110794	0.671179	Increase	nonDE	-0.107153	-0.72241	0.472669	0.999557	Decrease	nonDE	-0.083724	-0.542639	0.58926	0.983463	Decrease	nonDE	-0.307232	-1.94132	0.0566164	0.271605	Decrease
564	ENSMUSG00000003970	15	76788278	76790514	Rpl8	Rpl8	ribosomal protein L8 [Source:MGI Symbol;Acc:MGI:1350927]	2236	-0.0136093	-0.147101	0.883514	0.994082	Decrease	nonDE	-0.0627981	-0.655923	0.514221	0.937012	Decrease	nonDE	0.065143	0.670529	0.504929	0.846986	Increase	nonDE	-0.14155	-1.40138	0.165921	0.692801	Decrease	nonDE	-0.126851	-1.45046	0.151806	0.999557	Decrease	nonDE	-0.101638	-1.12559	0.264535	0.93157	Decrease	nonDE	-0.128924	-1.38301	0.171459	0.448948	Decrease
565	ENSMUSG00000003974	5	9535541	9775170	Grm3	Grm3	glutamate receptor, metabotropic 3 [Source:MGI Symbol;Acc:MGI:1351340]	239629	-0.0485515	-0.314112	0.754456	0.986466	Decrease	nonDE	0.0344315	0.213652	0.831496	0.984324	Increase	nonDE	0.0459438	0.27968	0.780623	0.947096	Increase	nonDE	-0.0600638	-0.349636	0.727758	0.925253	Decrease	nonDE	-0.114984	-0.777591	0.43967	0.999557	Decrease	nonDE	-0.265994	-1.76596	0.0821634	0.837201	Decrease	nonDE	-0.236759	-1.49936	0.138688	0.407869	Decrease
566	ENSMUSG00000003992	13	91608402	91851548	Ssbp2	Ssbp2	single-stranded DNA binding protein 2 [Source:MGI Symbol;Acc:MGI:1914220]	243146	-0.0352184	-0.227689	0.820613	0.989901	Decrease	nonDE	-0.0961713	-0.605467	0.547006	0.941232	Decrease	nonDE	-0.256888	-1.62164	0.109789	0.624966	Decrease	nonDE	0.125498	0.766235	0.446348	0.82172	Increase	nonDE	0.170142	1.17522	0.244253	0.999557	Increase	nonDE	-0.1398	-0.914464	0.363899	0.957289	Decrease	nonDE	0.0275094	0.178437	0.858943	0.943079	Increase
567	ENSMUSG00000004018	11	26336135	26421876	Fancl	Fancl	Fanconi anemia, complementation group L [Source:MGI Symbol;Acc:MGI:1914280]	85741	-0.36557	-1.03113	0.306355	0.924765	Decrease	nonDE	0.336312	0.909018	0.366745	0.916342	Increase	nonDE	0.193881	0.483901	0.630105	0.891439	Increase	nonDE	-0.223139	-0.534621	0.594761	0.880065	Decrease	nonDE	-0.126725	-0.399691	0.690713	0.999557	Decrease	nonDE	0.710533	1.92582	0.0585636	0.801038	Increase	nonDE	1.058	2.61665	0.011062	0.138916	Increase
568	ENSMUSG00000004031	1	158072839	158183896	Brinp2	Brinp2	bone morphogenic protein/retinoic acid inducible neural-specific 2 [Source:MGI Symbol;Acc:MGI:2443333]	111057	-0.157015	-0.638891	0.52517	0.963931	Decrease	nonDE	-0.264308	-1.08833	0.280525	0.90163	Decrease	nonDE	-0.282342	-1.12741	0.263771	0.732681	Decrease	nonDE	-0.13898	-0.55667	0.579691	0.874091	Decrease	nonDE	0.225202	1.09229	0.278793	0.999557	Increase	nonDE	-0.00794203	-0.035159	0.972062	0.999888	Decrease	nonDE	0.20866	0.890601	0.376473	0.651673	Increase
569	ENSMUSG00000004032	3	107803137	107806002	Gstm5	Gstm5	glutathione S-transferase, mu 5 [Source:MGI Symbol;Acc:MGI:1309466]	2865	-0.0660661	-0.424756	0.672436	0.97841	Decrease	nonDE	0.03433	0.212297	0.832549	0.984446	Increase	nonDE	-0.219881	-1.37174	0.174926	0.680092	Decrease	nonDE	0.188145	1.12257	0.265805	0.740969	Increase	nonDE	-0.11349	-0.775235	0.441051	0.999557	Decrease	nonDE	-0.179583	-1.19783	0.235394	0.925473	Decrease	nonDE	-0.340852	-2.20521	0.0310319	0.211001	Decrease
570	ENSMUSG00000004035	3	107833650	107839133	Gstm7	Gstm7	glutathione S-transferase, mu 7 [Source:MGI Symbol;Acc:MGI:1915562]	5483	-0.316698	-1.10445	0.273524	0.920945	Decrease	nonDE	0.199782	0.665756	0.507955	0.936291	Increase	nonDE	-0.00288227	-0.00914563	0.992731	0.998385	Decrease	nonDE	-0.114034	-0.345814	0.730614	0.925731	Decrease	nonDE	-0.548408	-2.07771	0.0417454	0.999557	Decrease	nonDE	-0.149528	-0.59059	0.556871	0.983222	Decrease	nonDE	-0.380456	-1.29058	0.201483	0.484252	Decrease
571	ENSMUSG00000004040	11	100775924	100830366	Stat3	Stat3	signal transducer and activator of transcription 3 [Source:MGI Symbol;Acc:MGI:103038]	54442	-0.0763602	-0.52374	0.602265	0.974472	Decrease	nonDE	-0.00310293	-0.0205696	0.983653	0.998292	Decrease	nonDE	-0.173436	-1.15066	0.254145	0.725175	Decrease	nonDE	0.0939725	0.599116	0.551207	0.86329	Increase	nonDE	0.132338	0.958327	0.341498	0.999557	Increase	nonDE	-0.030638	-0.209366	0.834826	0.995657	Decrease	nonDE	-0.0348707	-0.239581	0.811419	0.921213	Decrease
572	ENSMUSG00000004043	11	100750177	100775995	Stat5a	Stat5a	signal transducer and activator of transcription 5A [Source:MGI Symbol;Acc:MGI:103036]	25818	0.0853548	0.183747	0.854792	0.992351	Increase	nonDE	0.384523	0.745516	0.458684	0.930587	Increase	nonDE	-0.00265535	-0.00558516	0.995561	0.999471	Decrease	nonDE	0.472533	0.892344	0.375545	0.793199	Increase	nonDE	0.0118606	0.0222834	0.982291	0.999557	Increase	nonDE	-0.166328	-0.30123	0.764214	0.992561	Decrease	nonDE	-0.267192	-0.493078	0.623642	0.819738	Decrease
573	ENSMUSG00000004044	11	100847559	100861713	Cavin1	Cavin1	caveolae associated 1 [Source:MGI Symbol;Acc:MGI:1277968]	14154	0.197969	0.712478	0.478754	0.959726	Increase	nonDE	-0.607149	-2.17141	0.0336068	0.857116	Decrease	nonDE	0.246664	0.839475	0.404322	0.801153	Increase	nonDE	-0.655844	-2.2022	0.0312541	0.659766	Decrease	nonDE	-0.0632319	-0.25854	0.796819	0.999557	Decrease	nonDE	-0.130744	-0.51446	0.608699	0.98511	Decrease	nonDE	0.475447	1.71448	0.0912698	0.336514	Increase
574	ENSMUSG00000004054	19	5738770	5752893	Map3k11	Map3k11	mitogen-activated protein kinase kinase kinase 11 [Source:MGI Symbol;Acc:MGI:1346880]	14123	0.725852	1.59278	0.116127	0.914925	Increase	nonDE	-0.0240574	-0.0471632	0.96253	0.997115	Decrease	nonDE	-0.0199024	-0.0461874	0.963304	0.991854	Decrease	nonDE	0.721697	1.46733	0.147173	0.685125	Increase	nonDE	-0.241388	-0.62941	0.531317	0.999557	Decrease	nonDE	0.332619	0.780464	0.437989	0.974252	Increase	nonDE	0.274925	0.615682	0.540284	0.766528	Increase
575	ENSMUSG00000004056	7	27290977	27340251	Akt2	Akt2	thymoma viral proto-oncogene 2 [Source:MGI Symbol;Acc:MGI:104874]	49274	0.149358	0.848789	0.399157	0.947453	Increase	nonDE	0.047453	0.24964	0.803664	0.981192	Increase	nonDE	0.335884	1.7426	0.0861982	0.600474	Increase	nonDE	-0.139073	-0.671199	0.504505	0.845578	Decrease	nonDE	0.199279	1.1765	0.243746	0.999557	Increase	nonDE	-0.0369862	-0.201973	0.840577	0.995778	Decrease	nonDE	-0.200029	-1.14458	0.256636	0.541198	Decrease
576	ENSMUSG00000004069	16	4457853	4525559	Dnaja3	Dnaja3	DnaJ heat shock protein family (Hsp40) member A3 [Source:MGI Symbol;Acc:MGI:1933786]	67706	0.0522045	0.265706	0.791318	0.986922	Increase	nonDE	0.0439477	0.21273	0.832213	0.984446	Increase	nonDE	-0.158187	-0.790899	0.431919	0.814327	Decrease	nonDE	0.254339	1.20191	0.233817	0.7211	Increase	nonDE	-0.0762492	-0.420212	0.675736	0.999557	Decrease	nonDE	0.0158966	0.0830961	0.934034	0.999888	Increase	nonDE	-0.114933	-0.577944	0.565326	0.782315	Decrease
577	ENSMUSG00000004070	16	4544225	4584606	Hmox2	Hmox2	heme oxygenase 2 [Source:MGI Symbol;Acc:MGI:109373]	40381	-0.0422385	-0.30831	0.758846	0.986466	Decrease	nonDE	-0.158283	-1.12954	0.262877	0.898505	Decrease	nonDE	-0.114119	-0.799249	0.427097	0.811169	Decrease	nonDE	-0.086402	-0.587989	0.558605	0.86604	Decrease	nonDE	0.172196	1.38987	0.169374	0.999557	Increase	nonDE	-0.271067	-2.09613	0.0400221	0.781166	Decrease	nonDE	0.101615	0.760828	0.449549	0.704967	Increase
578	ENSMUSG00000004071	16	4568212	4608156	Cdip1	Cdip1	cell death inducing Trp53 target 1 [Source:MGI Symbol;Acc:MGI:1913876]	39944	0.0787339	0.817345	0.416758	0.951609	Increase	nonDE	-0.171907	-1.7305	0.0883519	0.857116	Decrease	nonDE	-0.0341162	-0.343783	0.732134	0.930224	Decrease	nonDE	-0.0590567	-0.573497	0.568314	0.869353	Decrease	nonDE	-0.0405023	-0.452397	0.65251	0.999557	Decrease	nonDE	-0.0194043	-0.207321	0.836416	0.995657	Decrease	nonDE	0.0980172	1.01345	0.314654	0.597094	Increase
579	ENSMUSG00000004085	2	72115981	72272954	Map3k20	Map3k20	mitogen-activated protein kinase kinase kinase 20 [Source:MGI Symbol;Acc:MGI:2443258]	156973	-0.283739	-1.07407	0.286816	0.921902	Decrease	nonDE	-0.156969	-0.606917	0.546049	0.940531	Decrease	nonDE	-0.15329	-0.539504	0.591408	0.878193	Decrease	nonDE	-0.287418	-1.02209	0.31058	0.757985	Decrease	nonDE	0.0839764	0.396871	0.692781	0.999557	Increase	nonDE	-0.0242796	-0.106391	0.915604	0.998625	Decrease	nonDE	0.85824	3.14951	0.00248403	0.0796882	Increase
580	ENSMUSG00000004096	9	14411913	14421873	Cwc15	Cwc15	CWC15 spliceosome-associated protein [Source:MGI Symbol;Acc:MGI:1913320]	9960	-0.0360406	-0.410533	0.682784	0.980606	Decrease	nonDE	0.0517414	0.565961	0.573396	0.950086	Increase	nonDE	-0.04459	-0.486995	0.627922	0.891421	Decrease	nonDE	0.0602909	0.629393	0.531328	0.857129	Increase	nonDE	-0.00156042	-0.01886	0.985011	0.999557	Decrease	nonDE	0.100424	1.14706	0.255617	0.927393	Increase	nonDE	0.0411423	0.462514	0.645279	0.832516	Increase
581	ENSMUSG00000004098	9	20681346	20726363	Col5a3	Col5a3	collagen, type V, alpha 3 [Source:MGI Symbol;Acc:MGI:1858212]	45017	0.704919	1.61314	0.111625	0.914925	Increase	nonDE	-0.393282	-0.847565	0.399833	0.919469	Decrease	nonDE	-0.0211216	-0.048356	0.961583	0.99176	Decrease	nonDE	0.332758	0.711749	0.479202	0.835249	Increase	nonDE	0.396741	1.05328	0.296165	0.999557	Increase	nonDE	-0.758106	-1.98818	0.0510644	0.795049	Decrease	nonDE	0.960619	2.2735	0.0263534	0.195745	Increase
582	ENSMUSG00000004099	9	20818505	20871184	Dnmt1	Dnmt1	DNA methyltransferase (cytosine-5) 1 [Source:MGI Symbol;Acc:MGI:94912]	52679	0.0871064	0.587783	0.558743	0.969437	Increase	nonDE	0.168751	1.06072	0.292795	0.903648	Increase	nonDE	0.188902	1.19636	0.23596	0.71223	Increase	nonDE	0.0669556	0.395216	0.693996	0.915149	Increase	nonDE	0.0254402	0.186214	0.852865	0.999557	Increase	nonDE	0.15762	1.07359	0.287031	0.942621	Increase	nonDE	0.035261	0.239697	0.81133	0.921167	Increase
583	ENSMUSG00000004100	9	20799471	20803474	Ppan	Ppan	peter pan homolog [Source:MGI Symbol;Acc:MGI:2178445]	4003	0.433107	1.09625	0.27707	0.920945	Increase	nonDE	0.116875	0.265998	0.791094	0.979581	Increase	nonDE	0.106766	0.269507	0.788405	0.949466	Increase	nonDE	0.443216	0.999003	0.321548	0.763066	Increase	nonDE	-0.155388	-0.436358	0.664043	0.999557	Decrease	nonDE	-0.143705	-0.388601	0.698859	0.991536	Decrease	nonDE	0.422975	0.996808	0.322605	0.604665	Increase
584	ENSMUSG00000004105	2	33106081	33137729	Angptl2	Angptl2	angiopoietin-like 2 [Source:MGI Symbol;Acc:MGI:1347002]	31648	0.200776	0.463648	0.64447	0.975554	Increase	nonDE	0.161747	0.343562	0.7323	0.97212	Increase	nonDE	0.318662	0.688602	0.493558	0.839835	Increase	nonDE	0.0438611	0.0873855	0.930637	0.982649	Increase	nonDE	0.502181	1.27999	0.20516	0.999557	Increase	nonDE	-0.681266	-1.66781	0.10023	0.849523	Decrease	nonDE	0.300864	0.733593	0.465871	0.716627	Increase
585	ENSMUSG00000004110	1	154266477	154760247	Cacna1e	Cacna1e	calcium channel, voltage-dependent, R type, alpha 1E subunit [Source:MGI Symbol;Acc:MGI:106217]	493770	0.0345143	0.168222	0.866938	0.992818	Increase	nonDE	0.298193	1.35138	0.181322	0.878309	Increase	nonDE	0.39565	1.76356	0.0825696	0.593784	Increase	nonDE	-0.0629423	-0.261903	0.794235	0.947606	Decrease	nonDE	0.156751	0.804854	0.423879	0.999557	Increase	nonDE	0.280476	1.31453	0.193352	0.904399	Increase	nonDE	0.14613	0.706075	0.482699	0.727405	Increase
586	ENSMUSG00000004113	2	24493899	24653164	Cacna1b	Cacna1b	calcium channel, voltage-dependent, N type, alpha 1B subunit [Source:MGI Symbol;Acc:MGI:88296]	159265	0.0453014	0.318561	0.751095	0.986466	Increase	nonDE	0.0163585	0.109434	0.9132	0.991255	Increase	nonDE	-0.0764143	-0.523849	0.602189	0.882365	Decrease	nonDE	0.138074	0.895578	0.373828	0.791996	Increase	nonDE	-0.0755997	-0.593008	0.555261	0.999557	Decrease	nonDE	0.181847	1.32794	0.188907	0.900928	Increase	nonDE	0.00207135	0.0148086	0.988231	0.995677	Increase
587	ENSMUSG00000004127	3	137849209	137865582	Trmt10a	Trmt10a	tRNA methyltransferase 10A [Source:MGI Symbol;Acc:MGI:1920421]	16373	0.136553	0.55754	0.5791	0.973085	Increase	nonDE	-0.130887	-0.509787	0.611951	0.95507	Decrease	nonDE	-0.109329	-0.448953	0.654979	0.90329	Decrease	nonDE	0.114995	0.446626	0.65665	0.903094	Increase	nonDE	-0.392415	-1.89028	0.0632421	0.999557	Decrease	nonDE	0.0115504	0.0550273	0.956288	0.999888	Increase	nonDE	-0.452643	-2.03334	0.0461617	0.249452	Decrease
588	ENSMUSG00000004151	12	38829379	38920483	Etv1	Etv1	ets variant 1 [Source:MGI Symbol;Acc:MGI:99254]	91104	0.0784803	0.662111	0.510273	0.962951	Increase	nonDE	0.137768	1.09925	0.275769	0.900648	Increase	nonDE	0.111536	0.900569	0.371188	0.786796	Increase	nonDE	0.104713	0.797064	0.428356	0.814133	Increase	nonDE	0.0916685	0.830286	0.409458	0.999557	Increase	nonDE	0.120248	1.02008	0.311524	0.947522	Increase	nonDE	0.132786	1.11828	0.267621	0.551952	Increase
589	ENSMUSG00000004187	15	76544058	76552396	Kifc2	Kifc2	kinesin family member C2 [Source:MGI Symbol;Acc:MGI:109187]	8338	-0.116945	-0.764818	0.447186	0.955557	Decrease	nonDE	-0.0896862	-0.575983	0.566643	0.948069	Decrease	nonDE	0.135009	0.806594	0.422882	0.8094	Increase	nonDE	-0.34164	-1.99522	0.0502724	0.659766	Decrease	nonDE	0.0470253	0.347802	0.729128	0.999557	Increase	nonDE	-0.280128	-2.00745	0.04892	0.794907	Decrease	nonDE	0.0402084	0.273181	0.785592	0.909383	Increase
590	ENSMUSG00000004207	10	60113449	60138376	Psap	Psap	prosaposin [Source:MGI Symbol;Acc:MGI:97783]	24927	-0.235774	-0.643454	0.522224	0.962951	Decrease	nonDE	0.45041	1.15816	0.251096	0.896322	Increase	nonDE	-0.417914	-1.11186	0.270348	0.735681	Decrease	nonDE	0.632549	1.57776	0.119541	0.674283	Increase	nonDE	0.485036	1.25471	0.214139	0.999557	Increase	nonDE	-0.506263	-1.25758	0.213106	0.918164	Decrease	nonDE	-0.356639	-0.917824	0.362151	0.639417	Decrease
591	ENSMUSG00000004221	X	73436896	73497460	Ikbkg	Ikbkg	inhibitor of kappaB kinase gamma [Source:MGI Symbol;Acc:MGI:1338074]	60564	-0.262931	-1.32725	0.189131	0.914925	Decrease	nonDE	0.0184806	0.0919754	0.927004	0.992643	Increase	nonDE	-0.195955	-0.928207	0.356781	0.781306	Decrease	nonDE	-0.0484948	-0.225097	0.82262	0.954716	Decrease	nonDE	-0.0328219	-0.18233	0.855899	0.999557	Decrease	nonDE	-0.149393	-0.79834	0.42762	0.968875	Decrease	nonDE	0.161435	0.78571	0.434931	0.695727	Increase
592	ENSMUSG00000004231	19	44744484	44826310	Pax2	Pax2	paired box 2 [Source:MGI Symbol;Acc:MGI:97486]	81826	0.162243	0.333425	0.739901	0.986466	Increase	nonDE	-0.630148	-1.3203	0.191428	0.882339	Decrease	nonDE	0.0648292	0.129279	0.897542	0.975332	Increase	nonDE	-0.532734	-1.07296	0.287308	0.751884	Decrease	nonDE	0.13178	0.322611	0.74804	0.999557	Increase	nonDE	0.427855	0.910214	0.366119	0.957932	Increase	nonDE	0.711625	1.47319	0.145592	0.417613	Increase
593	ENSMUSG00000004233	3	99048384	99146502	Wars2	Wars2	tryptophanyl tRNA synthetase 2 (mitochondrial) [Source:MGI Symbol;Acc:MGI:1917810]	98118	0.0952405	0.267364	0.790047	0.986922	Increase	nonDE	-0.0849848	-0.225943	0.821964	0.983804	Decrease	nonDE	-0.445855	-1.28939	0.201894	0.68977	Decrease	nonDE	0.45611	1.23515	0.221283	0.717424	Increase	nonDE	-0.138514	-0.417481	0.677721	0.999557	Decrease	nonDE	0.119948	0.340786	0.734379	0.992561	Increase	nonDE	-0.615039	-1.85655	0.0679702	0.293774	Decrease
594	ENSMUSG00000004263	6	124719507	124733487	Atn1	Atn1	atrophin 1 [Source:MGI Symbol;Acc:MGI:104725]	13980	0.18091	0.813326	0.419041	0.952553	Increase	nonDE	-0.231055	-0.99974	0.321194	0.907555	Decrease	nonDE	0.68556	2.63491	0.0105403	0.455927	Increase	nonDE	-0.735705	-2.73003	0.00816681	0.659766	Decrease	nonDE	-0.0453644	-0.235006	0.814953	0.999557	Decrease	nonDE	-0.146836	-0.733269	0.466067	0.975671	Decrease	nonDE	0.170863	0.781226	0.437544	0.697055	Increase
595	ENSMUSG00000004264	6	124689299	124693913	Phb2	Phb2	prohibitin 2 [Source:MGI Symbol;Acc:MGI:102520]	4614	-0.132414	-0.892387	0.375523	0.945006	Decrease	nonDE	0.0418729	0.272931	0.785784	0.979358	Increase	nonDE	-0.144764	-0.933495	0.354066	0.780258	Decrease	nonDE	0.0542224	0.336456	0.737626	0.928555	Increase	nonDE	-0.261367	-1.83486	0.0711658	0.999557	Decrease	nonDE	-0.124469	-0.860332	0.392812	0.962487	Decrease	nonDE	-0.330874	-2.15756	0.0347147	0.221678	Decrease
596	ENSMUSG00000004266	6	124697670	124715677	Ptpn6	Ptpn6	protein tyrosine phosphatase, non-receptor type 6 [Source:MGI Symbol;Acc:MGI:96055]	18007	-0.399035	-0.750468	0.455718	0.955993	Decrease	nonDE	-0.294098	-0.549989	0.584238	0.951194	Decrease	nonDE	-0.597269	-1.09763	0.27647	0.739321	Decrease	nonDE	-0.0958635	-0.173791	0.862577	0.96457	Decrease	nonDE	0.132899	0.266202	0.790938	0.999557	Increase	nonDE	-0.323076	-0.627745	0.5324	0.979776	Decrease	nonDE	0.0901518	0.172002	0.863978	0.944949	Increase
597	ENSMUSG00000004267	6	124737016	124746636	Eno2	Eno2	enolase 2, gamma neuronal [Source:MGI Symbol;Acc:MGI:95394]	9620	0.048783	0.51778	0.606394	0.974472	Increase	nonDE	-0.125797	-1.29174	0.201084	0.883214	Decrease	nonDE	0.0733518	0.745282	0.458824	0.824967	Increase	nonDE	-0.150366	-1.47049	0.146319	0.685125	Decrease	nonDE	-0.0181332	-0.204805	0.838373	0.999557	Decrease	nonDE	-0.0705431	-0.764369	0.447451	0.974779	Decrease	nonDE	0.121564	1.26923	0.208946	0.491703	Increase
598	ENSMUSG00000004268	6	124681048	124689141	Emg1	Emg1	EMG1 N1-specific pseudouridine methyltransferase [Source:MGI Symbol;Acc:MGI:1315195]	8093	0.0930181	0.321647	0.748767	0.986466	Increase	nonDE	0.264595	0.821229	0.414559	0.924801	Increase	nonDE	0.225263	0.716843	0.476074	0.833018	Increase	nonDE	0.13235	0.381083	0.704401	0.917965	Increase	nonDE	-0.169083	-0.570972	0.570014	0.999557	Decrease	nonDE	-0.237775	-0.798648	0.427443	0.968801	Decrease	nonDE	-0.870405	-2.94172	0.00453751	0.0987647	Decrease
599	ENSMUSG00000004270	6	124639990	124681381	Lpcat3	Lpcat3	lysophosphatidylcholine acyltransferase 3 [Source:MGI Symbol;Acc:MGI:1315211]	41391	0.0619777	0.360296	0.71981	0.986466	Increase	nonDE	0.0751364	0.409195	0.68376	0.964806	Increase	nonDE	0.511272	2.58251	0.0121015	0.455927	Increase	nonDE	-0.374158	-1.78533	0.0789371	0.661738	Decrease	nonDE	-0.0244719	-0.160208	0.873221	0.999557	Decrease	nonDE	0.0505041	0.309677	0.757811	0.992561	Increase	nonDE	0.298442	1.68961	0.0959599	0.345099	Increase
600	ENSMUSG00000004285	6	29467717	29470511	Atp6v1f	Atp6v1f	ATPase, H+ transporting, lysosomal V1 subunit F [Source:MGI Symbol;Acc:MGI:1913394]	2794	-0.104074	-0.721448	0.473257	0.959726	Decrease	nonDE	-0.106504	-0.719998	0.474143	0.930733	Decrease	nonDE	0.0802592	0.525259	0.601215	0.881986	Increase	nonDE	-0.290837	-1.84678	0.0693939	0.659766	Decrease	nonDE	-0.209346	-1.52543	0.132069	0.999557	Decrease	nonDE	-0.125413	-0.892062	0.375695	0.962347	Decrease	nonDE	-0.248149	-1.70752	0.0925631	0.339543	Decrease
601	ENSMUSG00000004317	X	7020049	7185597	Clcn5	Clcn5	chloride channel, voltage-sensitive 5 [Source:MGI Symbol;Acc:MGI:99486]	165548	-0.138498	-0.805291	0.423628	0.953752	Decrease	nonDE	0.105039	0.586346	0.559701	0.944885	Increase	nonDE	-0.0461517	-0.253073	0.801021	0.951964	Decrease	nonDE	0.0126923	0.0665977	0.947109	0.987922	Increase	nonDE	0.218655	1.30575	0.196303	0.999557	Increase	nonDE	-0.0158725	-0.0874233	0.930608	0.999888	Decrease	nonDE	0.101135	0.568486	0.571691	0.785902	Increase
602	ENSMUSG00000004319	8	61363423	61436334	Clcn3	Clcn3	chloride channel, voltage-sensitive 3 [Source:MGI Symbol;Acc:MGI:103555]	72911	0.0938455	1.39195	0.168746	0.914925	Increase	nonDE	-0.0575569	-0.819266	0.415669	0.924801	Decrease	nonDE	0.0320725	0.458823	0.647913	0.899995	Increase	nonDE	0.00421611	0.0575903	0.954254	0.990445	Increase	nonDE	0.0661064	1.06316	0.291699	0.999557	Increase	nonDE	0.112243	1.69332	0.0952486	0.849523	Increase	nonDE	0.212131	3.15379	0.00245278	0.0796526	Increase
603	ENSMUSG00000004344	13	21470599	21476901	Gpx5	Gpx5	glutathione peroxidase 5 [Source:MGI Symbol;Acc:MGI:104886]	6302	-1.09083	-1.42437	0.159189	0.914925	Decrease	nonDE	0.965076	1.21748	0.227881	0.89017	Increase	nonDE	-0.463784	-0.56903	0.571323	0.870529	Decrease	nonDE	0.338031	0.399192	0.691078	0.914449	Increase	nonDE	-0.330039	-0.414731	0.679723	0.999557	Decrease	nonDE	0.372149	0.45037	0.653962	0.98961	Increase	nonDE	-1.56125	-2.00356	0.0493469	0.255491	Decrease
604	ENSMUSG00000004347	6	56046789	56629472	Pde1c	Pde1c	phosphodiesterase 1C [Source:MGI Symbol;Acc:MGI:108413]	582683	0.0409304	0.374017	0.709626	0.985495	Increase	nonDE	-0.0076478	-0.0670117	0.946781	0.995038	Decrease	nonDE	0.178148	1.53868	0.128802	0.645363	Increase	nonDE	-0.144865	-1.19578	0.236187	0.723243	Decrease	nonDE	-0.143266	-1.38193	0.171788	0.999557	Decrease	nonDE	0.152366	1.39439	0.168012	0.896274	Increase	nonDE	-0.0372263	-0.334003	0.739467	0.885296	Decrease
605	ENSMUSG00000004356	10	88582469	88662666	Utp20	Utp20	UTP20 small subunit processome component [Source:MGI Symbol;Acc:MGI:1917933]	80197	0.101539	0.538338	0.592207	0.973503	Increase	nonDE	-0.121053	-0.617027	0.539402	0.938863	Decrease	nonDE	0.299294	1.46878	0.146781	0.658498	Increase	nonDE	-0.318808	-1.50115	0.138225	0.680875	Decrease	nonDE	-0.200447	-1.20542	0.232471	0.999557	Decrease	nonDE	0.24546	1.37056	0.175292	0.899859	Increase	nonDE	0.594538	2.8506	0.00586301	0.111229	Increase
606	ENSMUSG00000004360	10	29087602	29106775	9330159F19Rik	9330159F19Rik	RIKEN cDNA 9330159F19 gene [Source:MGI Symbol;Acc:MGI:3036239]	19173	0.183982	1.27016	0.208619	0.914925	Increase	nonDE	-0.0425538	-0.278843	0.781263	0.978439	Decrease	nonDE	-0.0916055	-0.623029	0.535475	0.858475	Decrease	nonDE	0.233033	1.49472	0.139893	0.682474	Increase	nonDE	0.179843	1.39786	0.166971	0.999557	Increase	nonDE	0.200394	1.43091	0.157313	0.892423	Increase	nonDE	0.278085	1.98164	0.0518101	0.260568	Increase
607	ENSMUSG00000004364	1	80242640	80318197	Cul3	Cul3	cullin 3 [Source:MGI Symbol;Acc:MGI:1347360]	75557	0.0307748	0.357088	0.722198	0.986466	Increase	nonDE	-0.0445683	-0.49847	0.619859	0.958004	Decrease	nonDE	-0.0265767	-0.297405	0.767118	0.9422	Decrease	nonDE	0.0127832	0.137149	0.891343	0.970512	Increase	nonDE	0.0695585	0.856523	0.394898	0.999557	Increase	nonDE	0.0831738	0.962806	0.339262	0.951231	Increase	nonDE	0.0803769	0.923286	0.35932	0.636881	Increase
608	ENSMUSG00000004366	16	23708323	23709708	Sst	Sst	somatostatin [Source:MGI Symbol;Acc:MGI:98326]	1385	-0.471433	-1.20331	0.233281	0.919545	Decrease	nonDE	-0.427911	-1.19096	0.238058	0.89216	Decrease	nonDE	-0.171664	-0.400534	0.690095	0.91728	Decrease	nonDE	-0.72768	-1.80848	0.0752204	0.659766	Decrease	nonDE	0.753736	2.01021	0.0486201	0.999557	Increase	nonDE	-1.06076	-2.81419	0.00648616	0.721732	Decrease	nonDE	0.237235	0.629243	0.531425	0.761521	Increase
609	ENSMUSG00000004371	7	4775372	4785858	Il11	Il11	interleukin 11 [Source:MGI Symbol;Acc:MGI:107613]	10486	-0.366345	-0.800031	0.426647	0.954235	Decrease	nonDE	0.664662	1.35498	0.180179	0.878309	Increase	nonDE	0.908472	1.75143	0.0846545	0.597436	Increase	nonDE	-0.610155	-1.10616	0.272789	0.746105	Decrease	nonDE	-0.945393	-1.89588	0.0624842	0.999557	Decrease	nonDE	0.420166	0.827797	0.410856	0.965421	Increase	nonDE	-1.47385	-2.94375	0.00451138	0.0986548	Decrease
610	ENSMUSG00000004383	8	73541227	74080168	Large1	Large1	LARGE xylosyl- and glucuronyltransferase 1 [Source:MGI Symbol;Acc:MGI:1342270]	538941	0.0523297	0.330429	0.742153	0.986466	Increase	nonDE	0.150321	0.895667	0.373781	0.916342	Increase	nonDE	0.279132	1.64946	0.103944	0.618244	Increase	nonDE	-0.0764815	-0.4262	0.67139	0.909577	Decrease	nonDE	-0.136828	-0.951195	0.345077	0.999557	Decrease	nonDE	0.220095	1.44249	0.154032	0.89229	Increase	nonDE	0.241974	1.52557	0.132036	0.397807	Increase
611	ENSMUSG00000004393	11	6208919	6217772	Ddx56	Ddx56	DEAD box helicase 56 [Source:MGI Symbol;Acc:MGI:1277172]	8853	0.417668	2.04214	0.0452549	0.914925	Increase	nonDE	-0.369159	-1.72768	0.0888602	0.857116	Decrease	nonDE	0.457664	2.07743	0.0417723	0.540815	Increase	nonDE	-0.409156	-1.77497	0.0806493	0.661738	Decrease	nonDE	-0.110749	-0.621197	0.536672	0.999557	Decrease	nonDE	-0.0685428	-0.369855	0.712709	0.992561	Decrease	nonDE	0.16058	0.781034	0.437657	0.697115	Increase
612	ENSMUSG00000004394	11	6220369	6224870	Tmed4	Tmed4	transmembrane p24 trafficking protein 4 [Source:MGI Symbol;Acc:MGI:1915070]	4501	-0.0737742	-0.400667	0.689997	0.981934	Decrease	nonDE	0.0570386	0.298223	0.766497	0.976695	Increase	nonDE	-0.272695	-1.4507	0.151738	0.664571	Decrease	nonDE	0.25596	1.30243	0.197428	0.706665	Increase	nonDE	0.176568	1.01602	0.313439	0.999557	Increase	nonDE	-0.367064	-2.04367	0.045099	0.781166	Decrease	nonDE	-0.146736	-0.804563	0.424045	0.687009	Decrease
613	ENSMUSG00000004415	5	136770613	136912063	Col26a1	Col26a1	collagen, type XXVI, alpha 1 [Source:MGI Symbol;Acc:MGI:2155345]	141450	-0.72713	-1.23551	0.221149	0.91505	Decrease	nonDE	0.36133	0.600955	0.549988	0.942774	Increase	nonDE	-0.176162	-0.281268	0.77941	0.946774	Decrease	nonDE	-0.189638	-0.294804	0.769096	0.939304	Decrease	nonDE	-0.207502	-0.361824	0.718674	0.999557	Decrease	nonDE	1.14493	1.84195	0.0701083	0.826898	Increase	nonDE	-0.356728	-0.599862	0.550712	0.772772	Decrease
614	ENSMUSG00000004446	6	120868891	120893814	Bid	Bid	BH3 interacting domain death agonist [Source:MGI Symbol;Acc:MGI:108093]	24923	0.612422	1.1343	0.260892	0.919545	Increase	nonDE	-0.887337	-1.6486	0.104122	0.859258	Decrease	nonDE	0.300073	0.548619	0.585172	0.875546	Increase	nonDE	-0.574988	-1.04577	0.299594	0.752803	Decrease	nonDE	0.32458	0.650238	0.517861	0.999557	Increase	nonDE	-0.813728	-1.64599	0.10466	0.853349	Decrease	nonDE	0.121617	0.231018	0.818036	0.924408	Increase
615	ENSMUSG00000004451	1	119398035	119432524	Ralb	Ralb	v-ral simian leukemia viral oncogene B [Source:MGI Symbol;Acc:MGI:1927244]	34489	0.0817039	0.389791	0.697983	0.98384	Increase	nonDE	-0.0121525	-0.0548099	0.95646	0.996936	Decrease	nonDE	-0.287148	-1.38579	0.170613	0.677976	Decrease	nonDE	0.356699	1.61242	0.111783	0.671311	Increase	nonDE	0.0381994	0.188242	0.851282	0.999557	Increase	nonDE	-0.36213	-1.74952	0.0849856	0.838748	Decrease	nonDE	-0.445745	-2.1447	0.0357718	0.224615	Decrease
616	ENSMUSG00000004455	5	122296341	122313336	Ppp1cc	Ppp1cc	protein phosphatase 1 catalytic subunit gamma [Source:MGI Symbol;Acc:MGI:104872]	16995	-0.31182	-1.23198	0.222456	0.915093	Decrease	nonDE	0.404009	1.49005	0.141113	0.866234	Increase	nonDE	0.462645	1.53394	0.129964	0.64566	Increase	nonDE	-0.370457	-1.1612	0.249863	0.729866	Decrease	nonDE	-0.216052	-1.00679	0.317822	0.999557	Decrease	nonDE	0.54624	2.22112	0.0298812	0.759871	Increase	nonDE	0.807379	2.8273	0.00625501	0.113788	Increase
617	ENSMUSG00000004460	16	22676595	22698384	Dnajb11	Dnajb11	DnaJ heat shock protein family (Hsp40) member B11 [Source:MGI Symbol;Acc:MGI:1915088]	21789	0.125127	0.629657	0.531156	0.964584	Increase	nonDE	-0.158632	-0.765963	0.446509	0.929096	Decrease	nonDE	-0.120321	-0.604735	0.547489	0.862519	Decrease	nonDE	0.0868164	0.415375	0.679254	0.912513	Increase	nonDE	0.00954127	0.0548234	0.95645	0.999557	Increase	nonDE	0.239006	1.25771	0.213059	0.918164	Increase	nonDE	-0.0697282	-0.368316	0.713851	0.872122	Decrease
618	ENSMUSG00000004462	16	22631964	22676419	Tbccd1	Tbccd1	TBCC domain containing 1 [Source:MGI Symbol;Acc:MGI:1917823]	44455	-0.0806151	-0.270414	0.78771	0.986922	Decrease	nonDE	0.435913	1.3107	0.194633	0.882339	Increase	nonDE	-0.0581855	-0.184908	0.853885	0.965093	Decrease	nonDE	0.413483	1.18132	0.241837	0.726304	Increase	nonDE	-0.229699	-0.756745	0.451974	0.999557	Decrease	nonDE	0.39938	1.2005	0.234362	0.925473	Increase	nonDE	-0.270323	-0.813803	0.41877	0.683788	Decrease
619	ENSMUSG00000004473	7	43952111	43956326	Clec11a	Clec11a	C-type lectin domain family 11, member a [Source:MGI Symbol;Acc:MGI:1298219]	4215	0.364567	0.666248	0.507643	0.962951	Increase	nonDE	-0.172598	-0.303103	0.762792	0.976695	Decrease	nonDE	-0.890229	-1.66454	0.100883	0.618012	Decrease	nonDE	1.0822	1.92498	0.0586706	0.659766	Increase	nonDE	0.487244	0.899153	0.371935	0.999557	Increase	nonDE	-1.30817	-2.41625	0.018539	0.724023	Decrease	nonDE	-0.55344	-1.01664	0.313146	0.595785	Decrease
620	ENSMUSG00000004500	7	12699765	12708163	Zfp324	Zfp324	zinc finger protein 324 [Source:MGI Symbol;Acc:MGI:2444641]	8398	-0.464968	-1.48369	0.142791	0.914925	Decrease	nonDE	0.861635	2.43695	0.0175974	0.857116	Increase	nonDE	0.383938	1.03631	0.303951	0.756925	Increase	nonDE	0.0127284	0.0312181	0.975193	0.995991	Increase	nonDE	0.269645	0.894663	0.374313	0.999557	Increase	nonDE	-0.198717	-0.611613	0.542956	0.981611	Decrease	nonDE	0.248616	0.74146	0.461121	0.713307	Increase
621	ENSMUSG00000004508	7	96730793	96958153	Gab2	Gab2	growth factor receptor bound protein 2-associated protein 2 [Source:MGI Symbol;Acc:MGI:1333854]	227360	0.115455	0.672685	0.503565	0.962408	Increase	nonDE	0.0276462	0.152226	0.879487	0.987056	Increase	nonDE	0.0917882	0.508186	0.613067	0.886665	Increase	nonDE	0.0513126	0.267847	0.789677	0.946186	Increase	nonDE	-0.0522002	-0.343717	0.732183	0.999557	Decrease	nonDE	-0.0135406	-0.0846449	0.932807	0.999888	Decrease	nonDE	-0.0141005	-0.0855037	0.932127	0.97385	Decrease
622	ENSMUSG00000004530	5	113980497	114046819	Coro1c	Coro1c	coronin, actin binding protein 1C [Source:MGI Symbol;Acc:MGI:1345964]	66322	-0.0701067	-0.433284	0.666263	0.97841	Decrease	nonDE	0.221241	1.28626	0.202976	0.883214	Increase	nonDE	0.195845	1.12048	0.266688	0.734246	Increase	nonDE	-0.0447109	-0.240853	0.810438	0.951944	Decrease	nonDE	0.115357	0.767441	0.445636	0.999557	Increase	nonDE	-0.14606	-0.926716	0.357549	0.956193	Decrease	nonDE	0.0611567	0.37927	0.70574	0.868054	Increase
623	ENSMUSG00000004535	6	52690714	52743765	Tax1bp1	Tax1bp1	Tax1 (human T cell leukemia virus type I) binding protein 1 [Source:MGI Symbol;Acc:MGI:1289308]	53051	0.0535174	0.523468	0.602453	0.974472	Increase	nonDE	-0.252857	-2.41605	0.0185483	0.857116	Decrease	nonDE	0.107964	1.00799	0.317246	0.765506	Increase	nonDE	-0.307304	-2.78649	0.00700049	0.659766	Decrease	nonDE	-0.0504375	-0.535602	0.594087	0.999557	Decrease	nonDE	-0.0793997	-0.810582	0.420604	0.967487	Decrease	nonDE	0.215075	2.09083	0.0405119	0.2358	Increase
624	ENSMUSG00000004558	14	52142728	52151615	Ndrg2	Ndrg2	N-myc downstream regulated gene 2 [Source:MGI Symbol;Acc:MGI:1352498]	8887	-0.115064	-0.875368	0.384641	0.945745	Decrease	nonDE	-0.0524665	-0.388112	0.699219	0.966626	Decrease	nonDE	0.0787994	0.565983	0.573381	0.870653	Increase	nonDE	-0.24633	-1.71217	0.0916975	0.662143	Decrease	nonDE	-0.187072	-1.51303	0.135185	0.999557	Decrease	nonDE	-0.0485714	-0.380531	0.704809	0.992561	Decrease	nonDE	-0.0982377	-0.740475	0.461715	0.713404	Decrease
625	ENSMUSG00000004561	14	52122299	52130496	Mettl17	Mettl17	methyltransferase like 17 [Source:MGI Symbol;Acc:MGI:1098577]	8197	0.096003	0.278477	0.781542	0.986922	Increase	nonDE	-0.199271	-0.566084	0.573313	0.950086	Decrease	nonDE	0.0602318	0.166031	0.868655	0.968561	Increase	nonDE	-0.1635	-0.438815	0.662271	0.905001	Decrease	nonDE	0.729927	2.18445	0.0325922	0.999557	Increase	nonDE	-0.255828	-0.688484	0.493632	0.977398	Decrease	nonDE	0.853725	2.31998	0.0235367	0.186772	Increase
626	ENSMUSG00000004562	14	52222176	52243708	Arhgef40	Arhgef40	Rho guanine nucleotide exchange factor (GEF) 40 [Source:MGI Symbol;Acc:MGI:2685515]	21532	-0.104152	-0.510826	0.611227	0.974472	Decrease	nonDE	0.0371604	0.173543	0.862771	0.986054	Increase	nonDE	-0.267943	-1.28496	0.203429	0.690551	Decrease	nonDE	0.200952	0.912308	0.365024	0.78496	Increase	nonDE	0.0167161	0.0889944	0.929364	0.999557	Increase	nonDE	-0.175149	-0.894529	0.374385	0.962347	Decrease	nonDE	-0.0606868	-0.297163	0.767302	0.900305	Decrease
627	ENSMUSG00000004565	8	3565384	3594267	Pnpla6	Pnpla6	patatin-like phospholipase domain containing 6 [Source:MGI Symbol;Acc:MGI:1354723]	28883	-0.176435	-0.863373	0.391151	0.946106	Decrease	nonDE	0.0426804	0.203271	0.839567	0.984929	Increase	nonDE	-0.131249	-0.601073	0.549911	0.863717	Decrease	nonDE	-0.00250491	-0.0111159	0.991165	0.998569	Decrease	nonDE	-0.142545	-0.766375	0.446266	0.999557	Decrease	nonDE	0.0776151	0.395945	0.69346	0.99144	Increase	nonDE	-0.181775	-0.912528	0.364909	0.641866	Decrease
628	ENSMUSG00000004567	8	3550457	3565232	Mcoln1	Mcoln1	mucolipin 1 [Source:MGI Symbol;Acc:MGI:1890498]	14775	0.204377	0.842019	0.402907	0.948681	Increase	nonDE	-0.282154	-1.13164	0.261998	0.898505	Decrease	nonDE	-0.183734	-0.77092	0.443586	0.817843	Decrease	nonDE	0.105957	0.428792	0.669512	0.908629	Increase	nonDE	-0.541474	-2.53081	0.0138442	0.999557	Decrease	nonDE	-0.21247	-1.0336	0.305208	0.947522	Decrease	nonDE	-0.429244	-1.81549	0.0741254	0.305225	Decrease
629	ENSMUSG00000004568	8	3403415	3506601	Arhgef18	Arhgef18	rho/rac guanine nucleotide exchange factor (GEF) 18 [Source:MGI Symbol;Acc:MGI:2142567]	103186	0.137746	0.889771	0.376915	0.945006	Increase	nonDE	0.22304	1.31269	0.193965	0.882339	Increase	nonDE	0.299176	1.7777	0.0801952	0.592295	Increase	nonDE	0.0616094	0.335591	0.738275	0.928561	Increase	nonDE	0.164243	1.19021	0.238354	0.999557	Increase	nonDE	-0.0784509	-0.526163	0.60059	0.984457	Decrease	nonDE	0.112864	0.751746	0.454955	0.708923	Increase
630	ENSMUSG00000004591	3	142496663	142587765	Pkn2	Pkn2	protein kinase N2 [Source:MGI Symbol;Acc:MGI:109211]	91102	0.115621	1.1497	0.254539	0.919545	Increase	nonDE	0.0231875	0.219096	0.827271	0.983804	Increase	nonDE	0.0525802	0.50268	0.616912	0.888457	Increase	nonDE	0.0862279	0.780187	0.438151	0.818064	Increase	nonDE	0.090353	0.969175	0.336099	0.999557	Increase	nonDE	-0.0396287	-0.402614	0.688572	0.99144	Decrease	nonDE	0.10891	1.08687	0.281164	0.564172	Increase
631	ENSMUSG00000004609	7	43173640	43193852	Cd33	Cd33	CD33 antigen [Source:MGI Symbol;Acc:MGI:99440]	20212	0.176136	0.409936	0.683219	0.980895	Increase	nonDE	-0.529455	-1.2228	0.225881	0.89017	Decrease	nonDE	-0.348819	-0.823043	0.413534	0.804337	Decrease	nonDE	-0.00450019	-0.0104456	0.991698	0.998569	Decrease	nonDE	0.0940205	0.209083	0.835046	0.999557	Increase	nonDE	-0.105934	-0.223062	0.824197	0.995216	Decrease	nonDE	0.0497276	0.105085	0.916636	0.966781	Increase
632	ENSMUSG00000004610	7	43093507	43107224	Etfb	Etfb	electron transferring flavoprotein, beta polypeptide [Source:MGI Symbol;Acc:MGI:106098]	13717	-0.0998867	-0.498751	0.619661	0.974913	Decrease	nonDE	-0.198223	-0.973967	0.333733	0.909867	Decrease	nonDE	-0.0257395	-0.121647	0.903559	0.976282	Decrease	nonDE	-0.27237	-1.2589	0.212629	0.713872	Decrease	nonDE	0.0182026	0.0988498	0.921566	0.999557	Increase	nonDE	-0.587064	-3.20258	0.00212138	0.721732	Decrease	nonDE	-0.161867	-0.827847	0.410828	0.677451	Decrease
633	ENSMUSG00000004626	8	3680955	3693644	Stxbp2	Stxbp2	syntaxin binding protein 2 [Source:MGI Symbol;Acc:MGI:107370]	12689	0.0846149	0.198274	0.843458	0.990577	Increase	nonDE	-0.163707	-0.372385	0.710834	0.968947	Decrease	nonDE	0.23497	0.519741	0.605034	0.884282	Increase	nonDE	-0.314062	-0.671308	0.504436	0.845578	Decrease	nonDE	0.60688	1.48562	0.142281	0.999557	Increase	nonDE	-1.13711	-2.80475	0.00665749	0.721732	Decrease	nonDE	-0.556496	-1.4726	0.14575	0.417745	Decrease
634	ENSMUSG00000004630	8	3673371	3675545	Pcp2	Pcp2	Purkinje cell protein 2 (L7) [Source:MGI Symbol;Acc:MGI:97508]	2174	-0.0517435	-0.369137	0.713242	0.985902	Decrease	nonDE	0.00365281	0.0251637	0.980003	0.998129	Increase	nonDE	0.110792	0.748989	0.456603	0.8239	Increase	nonDE	-0.158883	-1.03277	0.305589	0.756958	Decrease	nonDE	-0.128629	-0.980686	0.330434	0.999557	Decrease	nonDE	0.0465869	0.340478	0.73461	0.992561	Increase	nonDE	0.182748	1.27065	0.208443	0.49086	Increase
635	ENSMUSG00000004631	6	4674350	4747207	Sgce	Sgce	sarcoglycan, epsilon [Source:MGI Symbol;Acc:MGI:1329042]	72857	-0.237313	-0.886004	0.378926	0.945303	Decrease	nonDE	0.277473	0.970691	0.33535	0.910032	Increase	nonDE	-0.557212	-2.09465	0.0401581	0.539473	Decrease	nonDE	0.597372	2.08581	0.0409794	0.659766	Increase	nonDE	0.561568	2.0933	0.0402825	0.999557	Increase	nonDE	-0.24471	-0.828518	0.410451	0.965421	Decrease	nonDE	-0.355926	-1.39091	0.169061	0.446555	Decrease
636	ENSMUSG00000004633	6	54016539	54278795	Chn2	Chn2	chimerin 2 [Source:MGI Symbol;Acc:MGI:1917243]	262256	0.129785	1.21039	0.230572	0.919218	Increase	nonDE	0.0931776	0.819856	0.415335	0.924801	Increase	nonDE	0.379671	3.3179	0.00149765	0.430429	Increase	nonDE	-0.156708	-1.29108	0.201311	0.706665	Decrease	nonDE	-0.0680756	-0.688999	0.49331	0.999557	Decrease	nonDE	0.192	1.82464	0.0727142	0.830809	Increase	nonDE	0.203483	1.88144	0.0644532	0.287282	Increase
637	ENSMUSG00000004637	8	115166395	116079447	Wwox	Wwox	WW domain-containing oxidoreductase [Source:MGI Symbol;Acc:MGI:1931237]	913052	0.074643	0.400173	0.69036	0.981934	Increase	nonDE	-0.218428	-1.14951	0.254614	0.896322	Decrease	nonDE	0.0493426	0.254227	0.800134	0.951964	Increase	nonDE	-0.193128	-0.970424	0.335482	0.768746	Decrease	nonDE	0.0375876	0.219488	0.826967	0.999557	Increase	nonDE	-0.137179	-0.765301	0.4469	0.974779	Decrease	nonDE	-0.127525	-0.697456	0.488039	0.732195	Decrease
638	ENSMUSG00000004642	5	33792296	33809918	Slbp	Slbp	stem-loop binding protein [Source:MGI Symbol;Acc:MGI:108402]	17622	-0.618454	-1.48605	0.142167	0.914925	Decrease	nonDE	0.116452	0.286627	0.775322	0.977366	Increase	nonDE	-0.777208	-1.83901	0.0705444	0.581864	Decrease	nonDE	0.275206	0.660912	0.511036	0.84859	Increase	nonDE	-0.2626	-0.661423	0.510711	0.999557	Decrease	nonDE	0.30998	0.725219	0.470956	0.975671	Increase	nonDE	-0.339705	-0.816707	0.41712	0.682285	Decrease
639	ENSMUSG00000004655	6	55313417	55325540	Aqp1	Aqp1	aquaporin 1 [Source:MGI Symbol;Acc:MGI:103201]	12123	-0.00642668	-0.0127625	0.989857	0.997684	Decrease	nonDE	-0.117553	-0.228363	0.820091	0.983804	Decrease	nonDE	0.577796	1.00042	0.320869	0.766414	Increase	nonDE	-0.701776	-1.18634	0.239864	0.724896	Decrease	nonDE	0.548952	1.22832	0.223817	0.999557	Increase	nonDE	-0.464336	-0.970896	0.335249	0.951231	Decrease	nonDE	-0.00111366	-0.00243945	0.998061	0.999556	Decrease
640	ENSMUSG00000004661	9	57697636	57744076	Arid3b	Arid3b	AT rich interactive domain 3B (BRIGHT-like) [Source:MGI Symbol;Acc:MGI:1930768]	46440	0.463293	1.4254	0.158892	0.914925	Increase	nonDE	0.0952801	0.259386	0.796169	0.979719	Increase	nonDE	0.00819869	0.0258926	0.979423	0.996615	Increase	nonDE	0.550375	1.51767	0.134012	0.679178	Increase	nonDE	0.123844	0.410614	0.682725	0.999557	Increase	nonDE	0.359733	1.02155	0.310832	0.947522	Increase	nonDE	-0.175967	-0.575569	0.566921	0.783304	Decrease
641	ENSMUSG00000004665	10	79824418	79831896	Cnn2	Cnn2	calponin 2 [Source:MGI Symbol;Acc:MGI:105093]	7478	0.204422	0.45916	0.647672	0.975654	Increase	nonDE	-0.204873	-0.441056	0.660656	0.961661	Decrease	nonDE	0.0178157	0.0390607	0.968963	0.994386	Increase	nonDE	-0.0182671	-0.0381585	0.96968	0.9946	Decrease	nonDE	0.32779	0.786819	0.434286	0.999557	Increase	nonDE	-0.215629	-0.485874	0.628713	0.98827	Decrease	nonDE	0.717961	1.5642	0.122694	0.385174	Increase
642	ENSMUSG00000004667	10	79871783	79875629	Polr2e	Polr2e	polymerase (RNA) II (DNA directed) polypeptide E [Source:MGI Symbol;Acc:MGI:1913670]	3846	0.1286	0.939833	0.35083	0.941652	Increase	nonDE	-0.209645	-1.48474	0.142513	0.866234	Decrease	nonDE	0.130515	0.901	0.37096	0.786796	Increase	nonDE	-0.211561	-1.4091	0.163637	0.69175	Decrease	nonDE	-0.0595765	-0.481437	0.631845	0.999557	Decrease	nonDE	0.024104	0.185332	0.853553	0.995883	Increase	nonDE	0.0287907	0.214483	0.830851	0.929943	Increase
643	ENSMUSG00000004668	11	9141942	9634259	Abca13	Abca13	ATP-binding cassette, sub-family A (ABC1), member 13 [Source:MGI Symbol;Acc:MGI:2388707]	492317	-0.809619	-1.12903	0.263091	0.919545	Decrease	nonDE	0.820878	1.09161	0.279087	0.90163	Increase	nonDE	-0.659019	-0.874354	0.385189	0.794529	Decrease	nonDE	0.670278	0.845224	0.401129	0.802142	Increase	nonDE	-1.20424	-1.51406	0.134924	0.999557	Decrease	nonDE	0.213954	0.270064	0.787979	0.992561	Increase	nonDE	-1.04919	-1.25254	0.214921	0.496986	Decrease
644	ENSMUSG00000004677	8	71725358	71813357	Myo9b	Myo9b	myosin IXb [Source:MGI Symbol;Acc:MGI:106624]	87999	0.595303	1.33685	0.185996	0.914925	Increase	nonDE	-0.721333	-1.59437	0.115771	0.866234	Decrease	nonDE	-0.20634	-0.48939	0.626236	0.891421	Decrease	nonDE	0.0803099	0.185517	0.853409	0.962417	Increase	nonDE	-0.124448	-0.311836	0.756177	0.999557	Decrease	nonDE	0.0733089	0.174879	0.861726	0.995883	Increase	nonDE	-0.0853899	-0.196869	0.844553	0.937283	Decrease
645	ENSMUSG00000004698	12	34097579	34967094	Hdac9	Hdac9	histone deacetylase 9 [Source:MGI Symbol;Acc:MGI:1931221]	869515	0.0334962	0.193877	0.846885	0.991164	Increase	nonDE	-0.0830099	-0.463651	0.644468	0.959505	Decrease	nonDE	-0.146081	-0.828808	0.410287	0.803417	Decrease	nonDE	0.096567	0.525229	0.601236	0.882929	Increase	nonDE	0.213788	1.37546	0.173776	0.999557	Increase	nonDE	-0.0612278	-0.367014	0.714817	0.992561	Decrease	nonDE	0.284032	1.65553	0.102704	0.355225	Increase
646	ENSMUSG00000004709	1	171386761	171437314	Cd244a	Cd244a	CD244 molecule A [Source:MGI Symbol;Acc:MGI:109294]	50553	-1.13955	-1.46968	0.146539	0.914925	Decrease	nonDE	1.25698	1.5167	0.134257	0.866234	Increase	nonDE	-0.4908	-0.573206	0.56851	0.86985	Decrease	nonDE	0.60823	0.667375	0.506927	0.846712	Increase	nonDE	-0.412275	-0.467932	0.64142	0.999557	Decrease	nonDE	0.78359	0.840949	0.403502	0.963539	Increase	nonDE	-1.35522	-1.61224	0.111822	0.368172	Decrease
647	ENSMUSG00000004730	17	57665691	57790527	Adgre1	Adgre1	adhesion G protein-coupled receptor E1 [Source:MGI Symbol;Acc:MGI:106912]	124836	0.386493	0.728515	0.468951	0.959726	Increase	nonDE	-0.0804977	-0.140553	0.888664	0.987467	Decrease	nonDE	0.483066	0.858807	0.393646	0.795782	Increase	nonDE	-0.177071	-0.291756	0.771415	0.940424	Decrease	nonDE	1.05327	1.80588	0.0756306	0.999557	Increase	nonDE	-1.07284	-1.76515	0.0822993	0.837201	Decrease	nonDE	-0.235488	-0.411406	0.682147	0.854606	Decrease
648	ENSMUSG00000004748	11	4041480	4045445	Mtfp1	Mtfp1	mitochondrial fission process 1 [Source:MGI Symbol;Acc:MGI:1916686]	3965	-0.307863	-1.82094	0.0732815	0.914925	Decrease	nonDE	0.0370352	0.21717	0.828765	0.983932	Increase	nonDE	-0.338937	-1.92361	0.0588452	0.568511	Decrease	nonDE	0.0681093	0.380419	0.704892	0.917965	Increase	nonDE	-0.0671449	-0.413654	0.680508	0.999557	Decrease	nonDE	-0.40228	-2.48004	0.0157735	0.722317	Decrease	nonDE	-0.17144	-0.965194	0.338074	0.617864	Decrease
649	ENSMUSG00000004768	1	33758968	33781645	Rab23	Rab23	RAB23, member RAS oncogene family [Source:MGI Symbol;Acc:MGI:99833]	22677	0.0528302	0.231232	0.817871	0.989901	Increase	nonDE	0.197675	0.801716	0.425679	0.924801	Increase	nonDE	-0.116828	-0.498168	0.62007	0.889545	Decrease	nonDE	0.367333	1.44561	0.153157	0.687976	Increase	nonDE	0.0987523	0.470298	0.639738	0.999557	Increase	nonDE	0.157192	0.680107	0.498885	0.977709	Increase	nonDE	-0.191148	-0.855933	0.395222	0.665572	Decrease
650	ENSMUSG00000004771	9	64622581	64645040	Rab11a	Rab11a	RAB11A, member RAS oncogene family [Source:MGI Symbol;Acc:MGI:1858202]	22459	-0.0610718	-0.545139	0.587549	0.973503	Decrease	nonDE	-0.0458143	-0.395812	0.693558	0.966626	Decrease	nonDE	-0.10299	-0.884367	0.379803	0.790685	Decrease	nonDE	-0.00389622	-0.0322044	0.974409	0.99584	Decrease	nonDE	0.01732	0.162105	0.871733	0.999557	Increase	nonDE	-0.19862	-1.79626	0.0771635	0.834095	Decrease	nonDE	-0.327735	-2.95697	0.00434497	0.0969987	Decrease
651	ENSMUSG00000004788	12	85266255	85273402	Eif2b2	Eif2b2	eukaryotic translation initiation factor 2B, subunit 2 beta [Source:MGI Symbol;Acc:MGI:2145118]	7147	0.121519	0.857223	0.394514	0.946738	Increase	nonDE	-0.224154	-1.53493	0.129721	0.866234	Decrease	nonDE	0.249972	1.64276	0.105329	0.618319	Increase	nonDE	-0.352607	-2.24095	0.0284996	0.659766	Decrease	nonDE	-0.0553903	-0.434557	0.665343	0.999557	Decrease	nonDE	0.117002	0.863568	0.391044	0.962487	Increase	nonDE	0.229605	1.61883	0.110393	0.365466	Increase
652	ENSMUSG00000004789	12	85157607	85181619	Dlst	Dlst	dihydrolipoamide S-succinyltransferase (E2 component of 2-oxo-glutarate complex) [Source:MGI Symbol;Acc:MGI:1926170]	24012	-0.218003	-1.97714	0.052329	0.914925	Decrease	nonDE	0.221042	1.91885	0.0594566	0.857116	Increase	nonDE	0.0205527	0.174061	0.862366	0.967209	Increase	nonDE	-0.0175141	-0.141667	0.887787	0.969331	Decrease	nonDE	0.0844787	0.791688	0.431462	0.999557	Increase	nonDE	-0.0239055	-0.211589	0.833098	0.995657	Decrease	nonDE	-0.129504	-1.15513	0.252323	0.536732	Decrease
653	ENSMUSG00000004791	12	85213409	85224564	Pgf	Pgf	placental growth factor [Source:MGI Symbol;Acc:MGI:105095]	11155	0.100926	0.258443	0.796893	0.987533	Increase	nonDE	-0.0383713	-0.0943181	0.925151	0.992133	Decrease	nonDE	0.139358	0.33778	0.736632	0.931594	Increase	nonDE	-0.0768032	-0.178059	0.859238	0.963801	Decrease	nonDE	0.692523	1.76711	0.0819682	0.999557	Increase	nonDE	-0.948356	-2.35017	0.0218539	0.752641	Decrease	nonDE	0.441877	1.07753	0.285283	0.568591	Increase
654	ENSMUSG00000004798	11	61666475	61745899	Ulk2	Ulk2	unc-51 like kinase 2 [Source:MGI Symbol;Acc:MGI:1352758]	79424	0.0624597	0.621051	0.536767	0.964771	Increase	nonDE	0.0561239	0.531408	0.596972	0.951993	Increase	nonDE	-0.0350529	-0.336907	0.737287	0.93205	Decrease	nonDE	0.153637	1.39956	0.166465	0.692801	Increase	nonDE	-0.0276392	-0.293023	0.770451	0.999557	Decrease	nonDE	0.0284409	0.286822	0.775173	0.992561	Increase	nonDE	-0.0675683	-0.671687	0.504196	0.743903	Decrease
655	ENSMUSG00000004815	5	108794559	108817538	Dgkq	Dgkq	diacylglycerol kinase, theta [Source:MGI Symbol;Acc:MGI:102918]	22979	0.142139	0.725993	0.470485	0.959726	Increase	nonDE	-0.154183	-0.754417	0.453361	0.930047	Decrease	nonDE	0.385157	1.79384	0.0775543	0.590291	Increase	nonDE	-0.3972	-1.77156	0.0812188	0.661738	Decrease	nonDE	-0.105463	-0.608365	0.545094	0.999557	Decrease	nonDE	-0.00872478	-0.0480015	0.961864	0.999888	Decrease	nonDE	0.076244	0.399661	0.690734	0.859526	Increase
656	ENSMUSG00000004837	11	61544091	61563610	Grap	Grap	GRB2-related adaptor protein [Source:MGI Symbol;Acc:MGI:1918770]	19519	-0.0475764	-0.0916811	0.927237	0.994779	Decrease	nonDE	-0.0510686	-0.0953981	0.924296	0.992133	Decrease	nonDE	-1.49942	-3.05075	0.00331786	0.430429	Decrease	nonDE	1.40078	2.7297	0.00817414	0.659766	Increase	nonDE	-0.242842	-0.483907	0.6301	0.999557	Decrease	nonDE	-0.181222	-0.353641	0.724768	0.992561	Decrease	nonDE	-0.163102	-0.308934	0.758374	0.895667	Decrease
657	ENSMUSG00000004842	16	65317397	65331891	Pou1f1	Pou1f1	POU domain, class 1, transcription factor 1 [Source:MGI Symbol;Acc:MGI:97588]	14494	-1.33494	-1.92647	0.0584808	0.914925	Decrease	nonDE	1.60965	2.19018	0.0321546	0.857116	Increase	nonDE	-1.19257	-1.6481	0.104223	0.618275	Decrease	nonDE	1.46728	1.90634	0.0610896	0.659766	Increase	nonDE	-0.0855697	-0.109557	0.913103	0.999557	Decrease	nonDE	0.38648	0.472836	0.637936	0.989437	Increase	nonDE	-1.74214	-2.32859	0.0230457	0.185068	Decrease
658	ENSMUSG00000004843	16	65336014	65359612	Chmp2b	Chmp2b	charged multivesicular body protein 2B [Source:MGI Symbol;Acc:MGI:1916192]	23598	0.0466413	0.360895	0.719364	0.986466	Increase	nonDE	0.0356195	0.263049	0.793356	0.979581	Increase	nonDE	0.00556451	0.0412258	0.967244	0.993659	Increase	nonDE	0.0766963	0.540157	0.59096	0.878453	Increase	nonDE	0.00112182	0.00926248	0.992638	0.999557	Increase	nonDE	-0.0434606	-0.342391	0.733176	0.992561	Decrease	nonDE	-0.0589696	-0.455252	0.650466	0.834914	Decrease
659	ENSMUSG00000004846	5	137015873	137025502	Plod3	Plod3	procollagen-lysine, 2-oxoglutarate 5-dioxygenase 3 [Source:MGI Symbol;Acc:MGI:1347008]	9629	0.0182904	0.0764459	0.939302	0.995429	Increase	nonDE	-0.368775	-1.54547	0.127154	0.866234	Decrease	nonDE	-0.0839508	-0.337208	0.737061	0.931879	Decrease	nonDE	-0.266534	-1.06468	0.291012	0.752803	Decrease	nonDE	-0.0721997	-0.361494	0.718919	0.999557	Decrease	nonDE	-0.122705	-0.589826	0.55738	0.983222	Decrease	nonDE	0.402056	1.66389	0.101014	0.352916	Increase
660	ENSMUSG00000004849	5	137063847	137074989	Ap1s1	Ap1s1	adaptor protein complex AP-1, sigma 1 [Source:MGI Symbol;Acc:MGI:1098244]	11142	0.0903044	0.746758	0.457939	0.957035	Increase	nonDE	-0.351427	-2.86691	0.0056022	0.857116	Decrease	nonDE	-0.0261335	-0.210373	0.834044	0.959333	Decrease	nonDE	-0.234989	-1.85247	0.0685626	0.659766	Decrease	nonDE	-0.0889329	-0.806481	0.422947	0.999557	Decrease	nonDE	-0.159322	-1.4012	0.165977	0.895628	Decrease	nonDE	-0.12828	-1.08325	0.282755	0.56554	Decrease
661	ENSMUSG00000004864	17	28988271	28999207	Mapk13	Mapk13	mitogen-activated protein kinase 13 [Source:MGI Symbol;Acc:MGI:1346864]	10936	-0.950755	-1.9067	0.0610427	0.914925	Decrease	nonDE	1.10189	2.10856	0.0388948	0.857116	Increase	nonDE	-0.702339	-1.34091	0.18468	0.68429	Decrease	nonDE	0.853479	1.54944	0.126198	0.674283	Increase	nonDE	-0.358705	-0.747476	0.457509	0.999557	Decrease	nonDE	-0.00616613	-0.0125083	0.990059	0.999888	Decrease	nonDE	0.0401279	0.0772223	0.938687	0.976142	Increase
662	ENSMUSG00000004865	17	28806622	28841683	Srpk1	Srpk1	serine/arginine-rich protein specific kinase 1 [Source:MGI Symbol;Acc:MGI:106908]	35061	0.177477	1.28672	0.202819	0.914925	Increase	nonDE	-0.14091	-0.974592	0.333425	0.909867	Decrease	nonDE	0.305934	2.05609	0.0438491	0.546147	Increase	nonDE	-0.269367	-1.72517	0.0893137	0.662143	Decrease	nonDE	-0.0422881	-0.348048	0.728944	0.999557	Decrease	nonDE	-0.0223004	-0.174882	0.861724	0.995883	Decrease	nonDE	0.245685	1.81459	0.0742649	0.305665	Increase
663	ENSMUSG00000004872	1	78077904	78173771	Pax3	Pax3	paired box 3 [Source:MGI Symbol;Acc:MGI:97487]	95867	0.054899	0.190694	0.849368	0.991164	Increase	nonDE	0.572592	1.72148	0.0899851	0.857116	Increase	nonDE	0.0811627	0.263149	0.793279	0.950195	Increase	nonDE	0.546328	1.54775	0.126605	0.674283	Increase	nonDE	-0.575672	-1.8642	0.0668727	0.999557	Decrease	nonDE	0.230899	0.728891	0.468722	0.975671	Increase	nonDE	-0.93778	-2.98941	0.00396017	0.0945541	Decrease
664	ENSMUSG00000004880	1	181642900	181670611	Lbr	Lbr	lamin B receptor [Source:MGI Symbol;Acc:MGI:2138281]	27711	0.054428	0.286294	0.775576	0.986803	Increase	nonDE	0.101456	0.501975	0.617404	0.957407	Increase	nonDE	-0.10929	-0.554308	0.581296	0.873297	Decrease	nonDE	0.265174	1.26055	0.212041	0.713626	Increase	nonDE	0.0810315	0.480505	0.632504	0.999557	Increase	nonDE	-0.119702	-0.6721	0.503935	0.979245	Decrease	nonDE	-0.0129753	-0.0709939	0.943624	0.977677	Decrease
665	ENSMUSG00000004885	3	87855973	87860683	Crabp2	Crabp2	cellular retinoic acid binding protein II [Source:MGI Symbol;Acc:MGI:88491]	4710	0.842336	2.21363	0.0304182	0.914925	Increase	nonDE	-1.09551	-2.84448	0.00596378	0.857116	Decrease	nonDE	0.805026	2.03474	0.0460159	0.54725	Increase	nonDE	-1.0582	-2.62455	0.0108336	0.659766	Decrease	nonDE	0.468489	1.18783	0.239282	0.999557	Increase	nonDE	-1.11049	-2.86434	0.0056426	0.721732	Decrease	nonDE	-0.67277	-1.80211	0.0762281	0.309375	Decrease
666	ENSMUSG00000004891	3	87878385	87887758	Nes	Nes	nestin [Source:MGI Symbol;Acc:MGI:101784]	9373	0.12474	0.33981	0.73511	0.986466	Increase	nonDE	-0.771431	-2.19214	0.0320062	0.857116	Decrease	nonDE	0.119936	0.307014	0.759827	0.939903	Increase	nonDE	-0.766626	-2.0203	0.0475339	0.659766	Decrease	nonDE	0.00703324	0.0237038	0.981162	0.999557	Increase	nonDE	-0.101817	-0.320594	0.74956	0.992561	Decrease	nonDE	0.925875	2.42358	0.0182005	0.169248	Increase
667	ENSMUSG00000004892	3	87894838	87907537	Bcan	Bcan	brevican [Source:MGI Symbol;Acc:MGI:1096385]	12699	0.129453	0.820031	0.415236	0.951609	Increase	nonDE	-0.0292147	-0.176886	0.860156	0.985869	Decrease	nonDE	0.106344	0.646565	0.520221	0.854434	Increase	nonDE	-0.00610626	-0.0353322	0.971925	0.995221	Decrease	nonDE	-0.0270052	-0.190732	0.849338	0.999557	Decrease	nonDE	0.0207589	0.139646	0.889377	0.996816	Increase	nonDE	0.166277	1.07605	0.285939	0.569232	Increase
668	ENSMUSG00000004894	3	87929057	87934890	Hapln2	Hapln2	hyaluronan and proteoglycan link protein 2 [Source:MGI Symbol;Acc:MGI:2137300]	5833	0.0925162	0.34064	0.734488	0.986466	Increase	nonDE	-0.414228	-1.53935	0.12864	0.866234	Decrease	nonDE	-0.246522	-0.919486	0.361287	0.783819	Decrease	nonDE	-0.075189	-0.280692	0.779851	0.942294	Decrease	nonDE	-0.111406	-0.489367	0.626252	0.999557	Decrease	nonDE	0.155061	0.629861	0.531024	0.979776	Increase	nonDE	-0.195704	-0.784412	0.435687	0.695831	Decrease
669	ENSMUSG00000004895	3	87766210	87792915	Prcc	Prcc	papillary renal cell carcinoma (translocation-associated) [Source:MGI Symbol;Acc:MGI:2137738]	26705	0.174413	0.590602	0.556863	0.969036	Increase	nonDE	0.502995	1.46538	0.147705	0.86791	Increase	nonDE	0.0240889	0.0786889	0.937525	0.984995	Increase	nonDE	0.653319	1.8399	0.0704128	0.659766	Increase	nonDE	0.430862	1.63967	0.105971	0.999557	Increase	nonDE	-0.477973	-1.73077	0.0883021	0.838748	Decrease	nonDE	0.462819	1.57638	0.119859	0.381054	Increase
670	ENSMUSG00000004896	3	87829908	87838024	Rrnad1	Rrnad1	ribosomal RNA adenine dimethylase domain containing 1 [Source:MGI Symbol;Acc:MGI:2387197]	8116	-0.082361	-0.371917	0.711181	0.985899	Decrease	nonDE	-0.144195	-0.638494	0.525426	0.937012	Decrease	nonDE	0.143236	0.595278	0.553753	0.865577	Increase	nonDE	-0.369792	-1.50005	0.13851	0.680875	Decrease	nonDE	-0.221372	-1.00004	0.321049	0.999557	Decrease	nonDE	-0.182526	-0.815377	0.417875	0.967043	Decrease	nonDE	-0.638805	-2.81798	0.00641855	0.114865	Decrease
671	ENSMUSG00000004897	3	87813628	87823439	Hdgf	Hdgf	heparin binding growth factor [Source:MGI Symbol;Acc:MGI:1194494]	9811	0.0204629	0.194803	0.846163	0.991164	Increase	nonDE	-0.00284072	-0.0259825	0.979352	0.998129	Decrease	nonDE	-0.0263613	-0.241859	0.809662	0.953382	Decrease	nonDE	0.0439834	0.385749	0.70096	0.917177	Increase	nonDE	0.105464	1.0729	0.287338	0.999557	Increase	nonDE	-0.0353629	-0.341298	0.733995	0.992561	Decrease	nonDE	0.249934	2.33922	0.0224515	0.183425	Increase
672	ENSMUSG00000004902	6	120750539	120771297	Slc25a18	Slc25a18	solute carrier family 25 (mitochondrial carrier), member 18 [Source:MGI Symbol;Acc:MGI:1919053]	20758	-0.127902	-0.684173	0.496332	0.961612	Decrease	nonDE	0.111189	0.567978	0.572033	0.949793	Increase	nonDE	-0.347075	-1.83849	0.0706231	0.581864	Decrease	nonDE	0.330361	1.65927	0.101945	0.670439	Increase	nonDE	0.00362001	0.021406	0.982988	0.999557	Increase	nonDE	-0.161782	-0.921839	0.360068	0.956581	Decrease	nonDE	-0.136205	-0.743892	0.459659	0.711987	Decrease
673	ENSMUSG00000004929	10	80905869	80918393	Thop1	Thop1	thimet oligopeptidase 1 [Source:MGI Symbol;Acc:MGI:1354165]	12524	0.103722	0.290598	0.772297	0.986803	Increase	nonDE	0.0738074	0.192631	0.847857	0.985587	Increase	nonDE	-0.172798	-0.483504	0.630385	0.891439	Decrease	nonDE	0.350327	0.906192	0.368227	0.787843	Increase	nonDE	-0.345964	-1.03146	0.306198	0.999557	Decrease	nonDE	-0.345529	-1.05477	0.29549	0.943286	Decrease	nonDE	-0.595801	-1.72476	0.0893882	0.333119	Decrease
674	ENSMUSG00000004931	10	81102794	81109080	Apba3	Apba3	amyloid beta (A4) precursor protein-binding, family A, member 3 [Source:MGI Symbol;Acc:MGI:1888527]	6286	-0.391967	-0.539076	0.591702	0.973503	Decrease	nonDE	-0.515085	-0.712439	0.478778	0.930733	Decrease	nonDE	-1.64935	-2.34636	0.0220601	0.493361	Decrease	nonDE	0.742295	1.05308	0.296256	0.752803	Increase	nonDE	0.372484	0.52404	0.602058	0.999557	Increase	nonDE	0.127601	0.169779	0.865718	0.995883	Increase	nonDE	-0.258947	-0.355513	0.723372	0.876654	Decrease
675	ENSMUSG00000004933	10	81088769	81099199	Matk	Matk	megakaryocyte-associated tyrosine kinase [Source:MGI Symbol;Acc:MGI:99259]	10430	-0.407271	-1.17544	0.244166	0.919545	Decrease	nonDE	0.93717	2.33495	0.0226885	0.857116	Increase	nonDE	-0.530512	-1.48297	0.142982	0.654898	Decrease	nonDE	1.06041	2.56126	0.0127921	0.659766	Increase	nonDE	0.202606	0.609826	0.544133	0.999557	Increase	nonDE	-0.286552	-0.830541	0.409315	0.965421	Decrease	nonDE	0.167418	0.457671	0.648736	0.834166	Increase
676	ENSMUSG00000004934	10	80989100	81003757	Pias4	Pias4	protein inhibitor of activated STAT 4 [Source:MGI Symbol;Acc:MGI:2136940]	14657	-0.505848	-2.47787	0.0158613	0.914925	Decrease	nonDE	0.396022	1.86221	0.0671572	0.857116	Increase	nonDE	-0.514533	-2.41865	0.0184273	0.483308	Decrease	nonDE	0.404707	1.81772	0.0737798	0.659766	Increase	nonDE	0.176792	0.896803	0.373179	0.999557	Increase	nonDE	-0.243003	-1.16918	0.246657	0.926783	Decrease	nonDE	-0.205225	-1.0012	0.320493	0.602038	Decrease
677	ENSMUSG00000004936	9	64093052	64160913	Map2k1	Map2k1	mitogen-activated protein kinase kinase 1 [Source:MGI Symbol;Acc:MGI:1346866]	67861	-0.273995	-1.1073	0.272301	0.920945	Decrease	nonDE	0.208823	0.815005	0.418087	0.924801	Increase	nonDE	-0.569354	-2.27118	0.0265017	0.512484	Decrease	nonDE	0.504182	1.9284	0.0582357	0.659766	Increase	nonDE	0.1304	0.535347	0.594262	0.999557	Increase	nonDE	-0.181618	-0.714867	0.477286	0.975671	Decrease	nonDE	-0.28599	-1.12928	0.262989	0.546998	Decrease
678	ENSMUSG00000004937	10	80879909	80896015	Sgta	Sgta	small glutamine-rich tetratricopeptide repeat (TPR)-containing, alpha [Source:MGI Symbol;Acc:MGI:1098703]	16106	-0.0549455	-0.338033	0.736442	0.986466	Decrease	nonDE	0.0391246	0.231139	0.817943	0.983804	Increase	nonDE	0.241166	1.38006	0.172361	0.678379	Increase	nonDE	-0.256987	-1.40898	0.163673	0.69175	Decrease	nonDE	-0.0287305	-0.188121	0.851376	0.999557	Decrease	nonDE	-0.0953358	-0.599261	0.55111	0.983222	Decrease	nonDE	0.123678	0.74702	0.457782	0.710903	Increase
679	ENSMUSG00000004945	17	5461145	5490534	Tmem242	Tmem242	transmembrane protein 242 [Source:MGI Symbol;Acc:MGI:1917794]	29389	-0.211614	-0.954138	0.343597	0.939587	Decrease	nonDE	-0.0886856	-0.394319	0.694654	0.966626	Decrease	nonDE	-0.107067	-0.454207	0.651214	0.901777	Decrease	nonDE	-0.193232	-0.803345	0.424744	0.812103	Decrease	nonDE	-0.300576	-1.47893	0.144056	0.999557	Decrease	nonDE	-0.0118231	-0.0565728	0.955061	0.999888	Decrease	nonDE	-0.498056	-2.33391	0.0227468	0.184256	Decrease
680	ENSMUSG00000004947	5	136023654	136061726	Dtx2	Dtx2	deltex 2, E3 ubiquitin ligase [Source:MGI Symbol;Acc:MGI:1921448]	38072	-0.873868	-2.01443	0.0481632	0.914925	Decrease	nonDE	0.307218	0.729241	0.46851	0.930733	Increase	nonDE	-0.139947	-0.286799	0.775191	0.945453	Decrease	nonDE	-0.426704	-0.888048	0.377834	0.794505	Decrease	nonDE	0.222922	0.509097	0.612432	0.999557	Increase	nonDE	-0.518389	-1.15972	0.250462	0.927393	Decrease	nonDE	0.192153	0.40424	0.687381	0.857302	Increase
681	ENSMUSG00000004951	5	135916773	135918417	Hspb1	Hspb1	heat shock protein 1 [Source:MGI Symbol;Acc:MGI:96240]	1644	0.482559	1.3662	0.17665	0.914925	Increase	nonDE	-1.02292	-2.98051	0.00406251	0.857116	Decrease	nonDE	-0.255246	-0.781608	0.437321	0.816174	Decrease	nonDE	-0.285113	-0.894611	0.374341	0.791996	Decrease	nonDE	0.409264	1.43494	0.156165	0.999557	Increase	nonDE	-0.702092	-2.4147	0.0186111	0.724023	Decrease	nonDE	0.741294	2.24095	0.0284999	0.202811	Increase
682	ENSMUSG00000004952	5	136112770	136140714	Rasa4	Rasa4	RAS p21 protein activator 4 [Source:MGI Symbol;Acc:MGI:1858600]	27944	0.314093	0.94908	0.346143	0.940333	Increase	nonDE	0.193446	0.518324	0.606016	0.953792	Increase	nonDE	-0.165282	-0.512223	0.610255	0.885669	Decrease	nonDE	0.67282	1.82498	0.072662	0.659766	Increase	nonDE	-0.130653	-0.405763	0.686268	0.999557	Decrease	nonDE	0.0626277	0.181711	0.856383	0.995883	Increase	nonDE	-0.689335	-2.17722	0.0331515	0.218201	Decrease
683	ENSMUSG00000004961	7	4542764	4550540	Syt5	Syt5	synaptotagmin V [Source:MGI Symbol;Acc:MGI:1926368]	7776	0.0966801	0.238151	0.812523	0.989901	Increase	nonDE	-0.61728	-1.54455	0.127377	0.866234	Decrease	nonDE	0.5942	1.23533	0.221215	0.703639	Increase	nonDE	-1.1148	-2.32761	0.0231008	0.659766	Decrease	nonDE	0.147574	0.406315	0.685864	0.999557	Increase	nonDE	-0.147802	-0.383795	0.7024	0.992561	Decrease	nonDE	0.354749	0.820032	0.415236	0.681505	Increase
684	ENSMUSG00000004980	6	51437912	51446874	Hnrnpa2b1	Hnrnpa2b1	heterogeneous nuclear ribonucleoprotein A2/B1 [Source:MGI Symbol;Acc:MGI:104819]	8962	-0.0138529	-0.100623	0.920164	0.994099	Decrease	nonDE	0.0368949	0.257548	0.797581	0.979931	Increase	nonDE	-0.162767	-1.15088	0.254055	0.725175	Decrease	nonDE	0.185809	1.25519	0.213966	0.714613	Increase	nonDE	0.170436	1.31065	0.194651	0.999557	Increase	nonDE	-0.00439351	-0.0318268	0.974709	0.999888	Decrease	nonDE	-0.0847827	-0.622269	0.535972	0.764291	Decrease
685	ENSMUSG00000004988	6	117910520	117914653	Fxyd4	Fxyd4	FXYD domain-containing ion transport regulator 4 [Source:MGI Symbol;Acc:MGI:1889005]	4133	-1.112	-1.53443	0.129843	0.914925	Decrease	nonDE	1.85479	2.36015	0.0213217	0.857116	Increase	nonDE	-0.734552	-0.951049	0.345151	0.777242	Decrease	nonDE	1.47734	1.76693	0.0819992	0.661738	Increase	nonDE	-0.261352	-0.328697	0.743456	0.999557	Decrease	nonDE	0.326854	0.39404	0.694859	0.99144	Increase	nonDE	-1.18191	-1.51238	0.135349	0.402471	Decrease
686	ENSMUSG00000004994	8	84984424	84997009	Ccdc130	Ccdc130	coiled-coil domain containing 130 [Source:MGI Symbol;Acc:MGI:1914986]	12585	-0.107591	-0.336253	0.737778	0.986466	Decrease	nonDE	0.32624	0.92548	0.358186	0.915093	Increase	nonDE	0.496889	1.36125	0.178199	0.681509	Increase	nonDE	-0.27824	-0.701615	0.485458	0.837615	Decrease	nonDE	-0.328629	-1.1805	0.242161	0.999557	Decrease	nonDE	0.116481	0.404099	0.687484	0.99144	Increase	nonDE	0.180859	0.54674	0.586455	0.797446	Increase
687	ENSMUSG00000004996	8	84976535	84983955	Mri1	Mri1	methylthioribose-1-phosphate isomerase 1 [Source:MGI Symbol;Acc:MGI:1915123]	7420	-0.223908	-0.723708	0.471877	0.959726	Decrease	nonDE	0.107048	0.337642	0.736736	0.972882	Increase	nonDE	0.220145	0.63882	0.525215	0.854511	Increase	nonDE	-0.337005	-0.951721	0.344812	0.772905	Decrease	nonDE	-0.93631	-2.91206	0.004935	0.999557	Decrease	nonDE	0.0830456	0.27556	0.783772	0.992561	Increase	nonDE	-0.481683	-1.32941	0.188424	0.468593	Decrease
688	ENSMUSG00000005034	3	146435329	146518745	Prkacb	Prkacb	protein kinase, cAMP dependent, catalytic, beta [Source:MGI Symbol;Acc:MGI:97594]	83416	0.1411	1.33957	0.185113	0.914925	Increase	nonDE	-0.179181	-1.64425	0.10502	0.859258	Decrease	nonDE	0.197933	1.79171	0.0778985	0.590291	Increase	nonDE	-0.236014	-2.05519	0.0439393	0.659766	Decrease	nonDE	-0.00127736	-0.013267	0.989456	0.999557	Decrease	nonDE	0.091601	0.898886	0.372077	0.960279	Increase	nonDE	0.320616	3.03358	0.00348715	0.0897252	Increase
689	ENSMUSG00000005043	11	119234251	119246362	Sgsh	Sgsh	N-sulfoglucosamine sulfohydrolase (sulfamidase) [Source:MGI Symbol;Acc:MGI:1350341]	12111	-0.136179	-0.277433	0.782341	0.986922	Decrease	nonDE	-0.942345	-2.08469	0.0410846	0.857116	Decrease	nonDE	0.0935953	0.179689	0.857964	0.965738	Increase	nonDE	-1.17212	-2.39914	0.0193508	0.659766	Decrease	nonDE	0.319712	0.674309	0.502539	0.999557	Increase	nonDE	-0.596215	-1.2401	0.219459	0.920905	Decrease	nonDE	-0.0497437	-0.102087	0.919006	0.967849	Decrease
690	ENSMUSG00000005045	4	152423108	152474651	Chd5	Chd5	chromodomain helicase DNA binding protein 5 [Source:MGI Symbol;Acc:MGI:3036258]	51543	-0.0317908	-0.143515	0.886333	0.994099	Decrease	nonDE	-0.249262	-1.11924	0.267212	0.898505	Decrease	nonDE	-0.251875	-1.12004	0.266873	0.734396	Decrease	nonDE	-0.0291771	-0.128011	0.898541	0.97241	Decrease	nonDE	0.131279	0.652717	0.516272	0.999557	Increase	nonDE	-0.222566	-1.05863	0.293739	0.943286	Decrease	nonDE	0.289592	1.27767	0.205972	0.488792	Increase
691	ENSMUSG00000005054	10	78261503	78263456	Cstb	Cstb	cystatin B [Source:MGI Symbol;Acc:MGI:109514]	1953	-0.230859	-0.835504	0.406537	0.949571	Decrease	nonDE	0.347664	1.18402	0.240777	0.893911	Increase	nonDE	-0.378993	-1.33594	0.186292	0.684318	Decrease	nonDE	0.495799	1.63672	0.106589	0.670441	Increase	nonDE	-0.0799875	-0.291476	0.771628	0.999557	Decrease	nonDE	-0.0648237	-0.227351	0.820874	0.995051	Decrease	nonDE	-0.502131	-1.75025	0.0848585	0.324508	Decrease
692	ENSMUSG00000005057	5	136247001	136275410	Sh2b2	Sh2b2	SH2B adaptor protein 2 [Source:MGI Symbol;Acc:MGI:1345171]	28409	0.454272	0.994525	0.323706	0.932121	Increase	nonDE	0.109017	0.208453	0.835536	0.984477	Increase	nonDE	-0.152241	-0.352247	0.725808	0.92723	Decrease	nonDE	0.715531	1.41561	0.161729	0.691486	Increase	nonDE	-0.160785	-0.352483	0.725632	0.999557	Decrease	nonDE	-0.250419	-0.54354	0.588643	0.983463	Decrease	nonDE	-0.277425	-0.580638	0.56352	0.780852	Decrease
693	ENSMUSG00000005069	6	124373775	124392026	Pex5	Pex5	peroxisomal biogenesis factor 5 [Source:MGI Symbol;Acc:MGI:1098808]	18251	0.151148	0.364852	0.716423	0.985902	Increase	nonDE	-0.0328667	-0.0743639	0.940952	0.994674	Decrease	nonDE	-0.44709	-1.11235	0.270142	0.7355	Decrease	nonDE	0.565372	1.30295	0.197253	0.706665	Increase	nonDE	-0.13259	-0.382133	0.703626	0.999557	Decrease	nonDE	0.526948	1.33918	0.185241	0.899859	Increase	nonDE	-0.117885	-0.300395	0.764847	0.899038	Decrease
694	ENSMUSG00000005078	12	72132363	72148235	Jkamp	Jkamp	JNK1/MAPK8-associated membrane protein [Source:MGI Symbol;Acc:MGI:1915057]	15872	0.0425094	0.376184	0.708022	0.985014	Increase	nonDE	0.0515374	0.434753	0.665201	0.962115	Increase	nonDE	-0.0810339	-0.694794	0.489694	0.839224	Decrease	nonDE	0.175081	1.42385	0.159338	0.691486	Increase	nonDE	-0.0278817	-0.256439	0.798432	0.999557	Decrease	nonDE	-0.116563	-1.0321	0.305904	0.947522	Decrease	nonDE	-0.273113	-2.40511	0.0190641	0.172431	Decrease
695	ENSMUSG00000005087	2	102641486	102732010	Cd44	Cd44	CD44 antigen [Source:MGI Symbol;Acc:MGI:88338]	90524	-0.319908	-1.2324	0.222299	0.915093	Decrease	nonDE	0.247808	0.92092	0.360544	0.915534	Increase	nonDE	-0.122883	-0.439255	0.661953	0.906044	Decrease	nonDE	0.0507827	0.174638	0.861914	0.96457	Increase	nonDE	0.0823089	0.315095	0.753712	0.999557	Increase	nonDE	-0.292497	-1.08337	0.282703	0.939117	Decrease	nonDE	-0.718955	-2.77	0.00732433	0.120573	Decrease
696	ENSMUSG00000005089	2	102489004	102621129	Slc1a2	Slc1a2	solute carrier family 1 (glial high affinity glutamate transporter), member 2 [Source:MGI Symbol;Acc:MGI:101931]	132125	0.0668489	0.826848	0.41139	0.950825	Increase	nonDE	-0.0821815	-0.980616	0.330468	0.908241	Decrease	nonDE	-0.0501721	-0.6019	0.549363	0.863446	Decrease	nonDE	0.0348395	0.400862	0.689855	0.914449	Increase	nonDE	0.0208515	0.275259	0.784002	0.999557	Increase	nonDE	0.0144698	0.181272	0.856725	0.995883	Increase	nonDE	0.137926	1.68415	0.0970143	0.347408	Increase
697	ENSMUSG00000005102	2	118219099	118305715	Eif2ak4	Eif2ak4	eukaryotic translation initiation factor 2 alpha kinase 4 [Source:MGI Symbol;Acc:MGI:1353427]	86616	0.146033	0.893005	0.375194	0.945006	Increase	nonDE	-0.103776	-0.604511	0.547637	0.941232	Decrease	nonDE	0.20127	1.13818	0.259279	0.729129	Increase	nonDE	-0.159014	-0.856018	0.395176	0.80101	Decrease	nonDE	0.135232	0.91902	0.36153	0.999557	Increase	nonDE	-0.0330294	-0.20859	0.835429	0.995657	Decrease	nonDE	0.127813	0.792001	0.43128	0.693294	Increase
698	ENSMUSG00000005103	5	38684156	38720564	Wdr1	Wdr1	WD repeat domain 1 [Source:MGI Symbol;Acc:MGI:1337100]	36408	0.0910882	0.59934	0.551058	0.967174	Increase	nonDE	-0.138465	-0.880606	0.38182	0.916342	Decrease	nonDE	-0.116167	-0.747891	0.45726	0.824214	Decrease	nonDE	0.0687906	0.425272	0.672062	0.909717	Increase	nonDE	0.23335	1.6448	0.104906	0.999557	Increase	nonDE	-0.26814	-1.80293	0.076099	0.830809	Decrease	nonDE	-0.00921735	-0.0610562	0.951504	0.9813	Decrease
699	ENSMUSG00000005107	5	38506616	38660486	Slc2a9	Slc2a9	solute carrier family 2 (facilitated glucose transporter), member 9 [Source:MGI Symbol;Acc:MGI:2152844]	153870	-0.290118	-0.461578	0.645946	0.975554	Decrease	nonDE	1.07822	1.53465	0.129789	0.866234	Increase	nonDE	-0.190755	-0.291031	0.771967	0.944227	Decrease	nonDE	0.97886	1.33714	0.1859	0.699699	Increase	nonDE	-0.178332	-0.272129	0.786397	0.999557	Decrease	nonDE	0.223923	0.322674	0.747992	0.992561	Increase	nonDE	-0.592422	-0.904424	0.369156	0.644792	Decrease
700	ENSMUSG00000005124	15	66763169	66795050	Ccn4	Ccn4	cellular communication network factor 4 [Source:MGI Symbol;Acc:MGI:1197008]	31881	-0.203932	-0.533524	0.595515	0.974403	Decrease	nonDE	0.2408	0.603596	0.548241	0.941346	Increase	nonDE	-0.225135	-0.56842	0.571735	0.870534	Decrease	nonDE	0.262003	0.630647	0.530513	0.857019	Increase	nonDE	-0.408427	-1.20808	0.231453	0.999557	Decrease	nonDE	0.0613408	0.176835	0.860195	0.995883	Increase	nonDE	-0.505271	-1.39441	0.168006	0.445517	Decrease
701	ENSMUSG00000005125	15	66801167	66841489	Ndrg1	Ndrg1	N-myc downstream regulated gene 1 [Source:MGI Symbol;Acc:MGI:1341799]	40322	0.0623641	0.536063	0.59377	0.973503	Increase	nonDE	-0.325112	-2.7483	0.00777112	0.857116	Decrease	nonDE	-0.185755	-1.56611	0.122245	0.63913	Decrease	nonDE	-0.0769925	-0.633611	0.528588	0.856668	Decrease	nonDE	-0.0404261	-0.365664	0.715819	0.999557	Decrease	nonDE	-0.104801	-0.911793	0.365293	0.957289	Decrease	nonDE	-0.0852092	-0.723418	0.472054	0.720807	Decrease
702	ENSMUSG00000005131	9	53313625	53345702	4930550C14Rik	4930550C14Rik	RIKEN cDNA 4930550C14 gene [Source:MGI Symbol;Acc:MGI:1922561]	32077	-2.24174	-4.35639	4.87055e-05	0.303906	Decrease	nonDE	1.30687	2.50448	0.0148166	0.857116	Increase	nonDE	-1.05525	-1.89588	0.0624839	0.571949	Decrease	nonDE	0.12038	0.212076	0.83272	0.956639	Increase	nonDE	-0.520493	-0.971036	0.335179	0.999557	Decrease	nonDE	-0.597852	-1.11458	0.26919	0.934449	Decrease	nonDE	-1.05285	-1.92115	0.0591604	0.277869	Decrease
703	ENSMUSG00000005142	8	85809899	85824911	Man2b1	Man2b1	mannosidase 2, alpha B1 [Source:MGI Symbol;Acc:MGI:107286]	15012	-0.144914	-0.670928	0.504676	0.962756	Decrease	nonDE	0.226785	0.981754	0.329911	0.908016	Increase	nonDE	-0.287904	-1.31457	0.193337	0.686573	Decrease	nonDE	0.369775	1.56917	0.121531	0.674283	Increase	nonDE	-0.0969801	-0.442738	0.659445	0.999557	Decrease	nonDE	-0.224966	-1.00859	0.316963	0.947522	Decrease	nonDE	-0.354157	-1.53974	0.128544	0.393624	Decrease
704	ENSMUSG00000005148	14	99536127	99552472	Klf5	Klf5	Kruppel-like factor 5 [Source:MGI Symbol;Acc:MGI:1338056]	16345	0.405988	1.0133	0.314725	0.928638	Increase	nonDE	0.255095	0.559809	0.57756	0.951118	Increase	nonDE	-0.223421	-0.585559	0.560227	0.868387	Decrease	nonDE	0.884504	1.99973	0.0497696	0.659766	Increase	nonDE	-0.183668	-0.487151	0.627813	0.999557	Decrease	nonDE	0.0120976	0.0310618	0.975317	0.999888	Increase	nonDE	-0.188458	-0.457878	0.648588	0.834144	Decrease
705	ENSMUSG00000005150	8	85801664	85807935	Wdr83	Wdr83	WD repeat domain containing 83 [Source:MGI Symbol;Acc:MGI:1915086]	6271	0.0544603	0.185188	0.853666	0.992199	Increase	nonDE	0.619436	1.79642	0.077139	0.857116	Increase	nonDE	0.433034	1.29652	0.199444	0.688956	Increase	nonDE	0.240862	0.630623	0.530528	0.857019	Increase	nonDE	-0.366394	-1.19382	0.236945	0.999557	Decrease	nonDE	-0.0188747	-0.0593938	0.952823	0.999888	Decrease	nonDE	-0.589111	-1.84152	0.0701718	0.297531	Decrease
706	ENSMUSG00000005161	8	85696216	85701463	Prdx2	Prdx2	peroxiredoxin 2 [Source:MGI Symbol;Acc:MGI:109486]	5247	-0.180618	-1.585	0.117886	0.914925	Decrease	nonDE	0.0662065	0.562408	0.575799	0.950976	Increase	nonDE	-0.0930167	-0.777678	0.439619	0.816788	Decrease	nonDE	-0.021395	-0.172312	0.863735	0.964744	Decrease	nonDE	-0.196204	-1.79005	0.0781673	0.999557	Decrease	nonDE	-0.181535	-1.62384	0.109316	0.858592	Decrease	nonDE	-0.399108	-3.4763	0.000917731	0.0543639	Decrease
707	ENSMUSG00000005198	11	69624823	69649463	Polr2a	Polr2a	polymerase (RNA) II (DNA directed) polypeptide A [Source:MGI Symbol;Acc:MGI:98086]	24640	0.197456	1.24197	0.218771	0.914925	Increase	nonDE	-0.0377139	-0.225144	0.822583	0.983804	Decrease	nonDE	-0.0329855	-0.203506	0.839384	0.9603	Decrease	nonDE	0.192728	1.12184	0.266114	0.741309	Increase	nonDE	0.198627	1.38283	0.171513	0.999557	Increase	nonDE	0.0846148	0.545614	0.587225	0.983222	Increase	nonDE	0.172786	1.11448	0.269235	0.553566	Increase
708	ENSMUSG00000005204	11	69563941	69572910	Senp3	Senp3	SUMO/sentrin specific peptidase 3 [Source:MGI Symbol;Acc:MGI:2158736]	8969	-0.186753	-0.83024	0.409484	0.950164	Decrease	nonDE	-0.0100251	-0.0438242	0.965181	0.997115	Decrease	nonDE	0.0984659	0.398	0.691952	0.917435	Increase	nonDE	-0.295244	-1.16805	0.24711	0.726847	Decrease	nonDE	-0.433219	-2.05943	0.0435183	0.999557	Decrease	nonDE	-0.148163	-0.717895	0.47543	0.975671	Decrease	nonDE	0.0236735	0.0946531	0.924886	0.970222	Increase
709	ENSMUSG00000005220	5	72457368	72661816	Corin	Corin	corin, serine peptidase [Source:MGI Symbol;Acc:MGI:1349451]	204448	-0.142301	-0.537957	0.592469	0.973503	Decrease	nonDE	0.47121	1.59759	0.115051	0.866234	Increase	nonDE	0.253066	0.845969	0.400716	0.79934	Increase	nonDE	0.0758428	0.230801	0.818205	0.954041	Increase	nonDE	-0.149279	-0.601264	0.549784	0.999557	Decrease	nonDE	0.496613	1.75934	0.0832898	0.838748	Increase	nonDE	0.153794	0.539241	0.591588	0.800718	Increase
710	ENSMUSG00000005225	6	54572096	54622824	Plekha8	Plekha8	pleckstrin homology domain containing, family A (phosphoinositide binding specific) member 8 [Source:MGI Symbol;Acc:MGI:2681164]	50728	-0.0742128	-0.370136	0.712501	0.985902	Decrease	nonDE	0.266483	1.23698	0.220607	0.886319	Increase	nonDE	-0.262678	-1.29574	0.19971	0.688956	Decrease	nonDE	0.454949	2.07555	0.0419511	0.659766	Increase	nonDE	0.0636437	0.352972	0.725267	0.999557	Increase	nonDE	0.297144	1.45591	0.150297	0.891709	Increase	nonDE	-0.129429	-0.672421	0.503732	0.743581	Decrease
711	ENSMUSG00000005233	2	69024239	69036538	Spc25	Spc25	SPC25, NDC80 kinetochore complex component, homolog (S. cerevisiae) [Source:MGI Symbol;Acc:MGI:1913692]	12299	-0.145289	-0.248308	0.80469	0.989294	Decrease	nonDE	-0.0216054	-0.0358725	0.971495	0.997115	Decrease	nonDE	-0.258551	-0.427862	0.670185	0.910356	Decrease	nonDE	0.0916565	0.146445	0.884029	0.967841	Increase	nonDE	-0.206059	-0.351715	0.726205	0.999557	Decrease	nonDE	0.454021	0.741604	0.461035	0.975671	Increase	nonDE	-0.565792	-0.937654	0.351941	0.630734	Decrease
712	ENSMUSG00000005237	11	69311635	69439936	Dnah2	Dnah2	dynein, axonemal, heavy chain 2 [Source:MGI Symbol;Acc:MGI:107731]	128301	-0.208024	-0.318427	0.751196	0.986466	Decrease	nonDE	0.558142	0.811649	0.419996	0.924801	Increase	nonDE	-0.494071	-0.739141	0.462519	0.827605	Decrease	nonDE	0.84419	1.19303	0.237255	0.723672	Increase	nonDE	-0.0984842	-0.145555	0.884729	0.999557	Decrease	nonDE	0.264764	0.374647	0.709159	0.992561	Increase	nonDE	-0.981341	-1.43878	0.155077	0.429549	Decrease
713	ENSMUSG00000005251	16	97543133	97564987	Ripk4	Ripk4	receptor-interacting serine-threonine kinase 4 [Source:MGI Symbol;Acc:MGI:1919638]	21854	-0.464377	-0.896713	0.373227	0.944702	Decrease	nonDE	0.103885	0.196442	0.844886	0.985587	Increase	nonDE	-0.858858	-1.63034	0.107933	0.621827	Decrease	nonDE	0.498367	0.919541	0.361259	0.782993	Increase	nonDE	0.738861	1.409	0.163667	0.999557	Increase	nonDE	-0.877115	-1.62137	0.109846	0.859738	Decrease	nonDE	-0.607569	-1.16075	0.250046	0.534317	Decrease
714	ENSMUSG00000005262	16	18630529	18654011	Ufd1	Ufd1	ubiquitin recognition factor in ER-associated degradation 1 [Source:MGI Symbol;Acc:MGI:109353]	23482	-0.148998	-1.30638	0.196091	0.914925	Decrease	nonDE	0.137659	1.15916	0.250688	0.896322	Increase	nonDE	-0.0525632	-0.436709	0.663789	0.906629	Decrease	nonDE	0.0412236	0.327715	0.744195	0.931251	Increase	nonDE	-0.0409029	-0.375346	0.708642	0.999557	Decrease	nonDE	-0.00230253	-0.0201087	0.984019	0.999888	Decrease	nonDE	-0.0888456	-0.760436	0.449781	0.705074	Decrease
715	ENSMUSG00000005267	11	62591182	62622731	Zfp287	Zfp287	zinc finger protein 287 [Source:MGI Symbol;Acc:MGI:2176561]	31549	-0.338375	-1.66687	0.100417	0.914925	Decrease	nonDE	0.425567	1.95655	0.0547589	0.857116	Increase	nonDE	-0.084554	-0.381662	0.703974	0.921353	Decrease	nonDE	0.171746	0.725805	0.470599	0.831522	Increase	nonDE	0.0304258	0.165962	0.868709	0.999557	Increase	nonDE	0.283693	1.37331	0.17444	0.899859	Increase	nonDE	-0.0379651	-0.190801	0.849284	0.939473	Decrease
716	ENSMUSG00000005268	15	10177324	10349266	Prlr	Prlr	prolactin receptor [Source:MGI Symbol;Acc:MGI:97763]	171942	0.191374	0.514936	0.608368	0.974472	Increase	nonDE	-0.229214	-0.598956	0.551312	0.942924	Decrease	nonDE	-0.22953	-0.616385	0.539823	0.859357	Decrease	nonDE	0.19169	0.495906	0.621656	0.890401	Increase	nonDE	0.770509	1.94736	0.0558737	0.999557	Increase	nonDE	-0.751081	-1.80008	0.076553	0.830809	Decrease	nonDE	-0.062702	-0.161449	0.872248	0.947987	Decrease
717	ENSMUSG00000005299	5	33897017	33940161	Letm1	Letm1	leucine zipper-EF-hand containing transmembrane protein 1 [Source:MGI Symbol;Acc:MGI:1932557]	43144	0.057023	0.424016	0.672973	0.97841	Increase	nonDE	0.0209187	0.148448	0.882455	0.987074	Increase	nonDE	0.190873	1.3399	0.185007	0.684318	Increase	nonDE	-0.112932	-0.754511	0.453305	0.823458	Decrease	nonDE	0.0331433	0.267132	0.790225	0.999557	Increase	nonDE	0.0125063	0.0955361	0.924187	0.999888	Increase	nonDE	0.288637	2.11192	0.0385944	0.231688	Increase
718	ENSMUSG00000005312	13	58323970	58363467	Ubqln1	Ubqln1	ubiquilin 1 [Source:MGI Symbol;Acc:MGI:1860276]	39497	-0.198834	-2.46077	0.016567	0.914925	Decrease	nonDE	0.0798092	0.957474	0.341925	0.91214	Increase	nonDE	-0.0960494	-1.13212	0.261799	0.730762	Decrease	nonDE	-0.0229755	-0.261211	0.794767	0.947887	Decrease	nonDE	0.0361627	0.464267	0.644029	0.999557	Increase	nonDE	-0.00875619	-0.106755	0.915317	0.998625	Decrease	nonDE	0.00407893	0.049063	0.961022	0.984801	Increase
719	ENSMUSG00000005338	1	173160825	173195261	Cadm3	Cadm3	cell adhesion molecule 3 [Source:MGI Symbol;Acc:MGI:2137858]	34436	0.0667047	0.380805	0.704606	0.98483	Increase	nonDE	0.111151	0.600227	0.550471	0.942835	Increase	nonDE	0.418645	2.22199	0.0298198	0.526423	Increase	nonDE	-0.24079	-1.20858	0.231262	0.720885	Decrease	nonDE	-0.166261	-1.03698	0.30364	0.999557	Decrease	nonDE	0.121021	0.718545	0.475032	0.975671	Increase	nonDE	0.163966	0.933255	0.35419	0.632219	Increase
720	ENSMUSG00000005354	15	77799247	77813206	Txn2	Txn2	thioredoxin 2 [Source:MGI Symbol;Acc:MGI:1929468]	13959	-0.0716491	-0.539372	0.591499	0.973503	Decrease	nonDE	-0.22329	-1.65253	0.103316	0.859258	Decrease	nonDE	-0.0862887	-0.619195	0.537982	0.859357	Decrease	nonDE	-0.208651	-1.46263	0.148453	0.686998	Decrease	nonDE	-0.142563	-1.17294	0.245157	0.999557	Decrease	nonDE	-0.0651142	-0.517251	0.606761	0.984737	Decrease	nonDE	-0.196402	-1.5162	0.134384	0.400937	Decrease
721	ENSMUSG00000005357	10	78616330	78650599	Slc1a6	Slc1a6	solute carrier family 1 (high affinity aspartate/glutamate transporter), member 6 [Source:MGI Symbol;Acc:MGI:1096331]	34269	0.053664	0.292344	0.770968	0.986803	Increase	nonDE	-0.0167433	-0.0873365	0.930676	0.993112	Decrease	nonDE	0.387662	1.9649	0.0537622	0.560523	Increase	nonDE	-0.350741	-1.69899	0.0941689	0.664169	Decrease	nonDE	-0.228051	-1.35211	0.181089	0.999557	Decrease	nonDE	0.00640944	0.0366879	0.970848	0.999888	Increase	nonDE	0.13349	0.720384	0.473907	0.72187	Increase
722	ENSMUSG00000005360	15	8663608	8740248	Slc1a3	Slc1a3	solute carrier family 1 (glial high affinity glutamate transporter), member 3 [Source:MGI Symbol;Acc:MGI:99917]	76640	-0.132112	-1.09181	0.279001	0.920945	Decrease	nonDE	0.247922	1.94401	0.0562843	0.857116	Increase	nonDE	0.0157158	0.123223	0.902316	0.976282	Increase	nonDE	0.100094	0.74269	0.460381	0.825561	Increase	nonDE	-0.181996	-1.55115	0.125788	0.999557	Decrease	nonDE	-0.15106	-1.25774	0.213048	0.918164	Decrease	nonDE	-0.555782	-4.58327	2.17153e-05	0.0186957	Decrease
723	ENSMUSG00000005362	6	106757162	106777038	Crbn	Crbn	cereblon [Source:MGI Symbol;Acc:MGI:1913277]	19876	0.0752656	0.612887	0.542119	0.965824	Increase	nonDE	-0.269033	-2.14305	0.0359096	0.857116	Decrease	nonDE	0.100743	0.77575	0.440749	0.816788	Increase	nonDE	-0.294511	-2.20632	0.0309507	0.659766	Decrease	nonDE	0.00600335	0.0534883	0.957509	0.999557	Increase	nonDE	0.0189147	0.158857	0.874281	0.995883	Increase	nonDE	-0.0303214	-0.250236	0.803205	0.917538	Decrease
724	ENSMUSG00000005370	17	88282490	88298320	Msh6	Msh6	mutS homolog 6 [Source:MGI Symbol;Acc:MGI:1343961]	15830	-0.162393	-0.920434	0.360796	0.943914	Decrease	nonDE	0.0660608	0.360128	0.719935	0.970035	Increase	nonDE	0.241481	1.22395	0.225451	0.705499	Increase	nonDE	-0.337813	-1.64732	0.104384	0.670439	Decrease	nonDE	0.137525	0.792517	0.430982	0.999557	Increase	nonDE	-0.194688	-1.05924	0.293465	0.943286	Decrease	nonDE	-0.200368	-1.09229	0.278794	0.5627	Decrease
725	ENSMUSG00000005371	17	88298287	88372719	Fbxo11	Fbxo11	F-box protein 11 [Source:MGI Symbol;Acc:MGI:2147134]	74432	-0.0640455	-0.758358	0.451015	0.955764	Decrease	nonDE	0.0700432	0.79625	0.428825	0.925602	Increase	nonDE	0.0250972	0.282869	0.778188	0.946149	Increase	nonDE	-0.0190995	-0.20584	0.837568	0.95755	Decrease	nonDE	-0.0926577	-1.13629	0.260066	0.999557	Decrease	nonDE	-0.116327	-1.38106	0.172054	0.899629	Decrease	nonDE	-0.181167	-2.0977	0.0398787	0.234303	Decrease
726	ENSMUSG00000005373	5	135118744	135167236	Mlxipl	Mlxipl	MLX interacting protein-like [Source:MGI Symbol;Acc:MGI:1927999]	48492	0.510939	0.97986	0.330838	0.935728	Increase	nonDE	-0.24183	-0.443362	0.658996	0.961336	Decrease	nonDE	0.644182	1.19064	0.238183	0.714021	Increase	nonDE	-0.375072	-0.659624	0.511857	0.849165	Decrease	nonDE	-0.31149	-0.576816	0.566083	0.999557	Decrease	nonDE	-0.495707	-0.90692	0.367845	0.95914	Decrease	nonDE	-1.37781	-2.53397	0.0137317	0.150655	Decrease
727	ENSMUSG00000005374	5	135178511	135194614	Tbl2	Tbl2	transducin (beta)-like 2 [Source:MGI Symbol;Acc:MGI:1351652]	16103	0.284982	1.21982	0.227	0.918353	Increase	nonDE	-0.13084	-0.529319	0.598412	0.951993	Decrease	nonDE	0.455591	1.78222	0.0794483	0.590857	Increase	nonDE	-0.301449	-1.11638	0.268426	0.742744	Decrease	nonDE	-0.343148	-1.64653	0.104547	0.999557	Decrease	nonDE	0.214828	0.982605	0.329495	0.950337	Increase	nonDE	0.155354	0.63874	0.525267	0.757393	Increase
728	ENSMUSG00000005378	5	135081811	135093813	Bud23	Bud23	BUD23, rRNA methyltransferase and ribosome maturation factor [Source:MGI Symbol;Acc:MGI:1913388]	12002	0.228936	0.549242	0.584747	0.973503	Increase	nonDE	0.215913	0.472154	0.63842	0.959124	Increase	nonDE	-0.0994987	-0.235347	0.81469	0.955004	Decrease	nonDE	0.544348	1.16754	0.247314	0.727194	Increase	nonDE	-0.401472	-1.22459	0.225211	0.999557	Decrease	nonDE	-0.00476113	-0.014555	0.988432	0.999888	Decrease	nonDE	-0.281162	-0.768235	0.445167	0.701911	Decrease
729	ENSMUSG00000005397	13	13612136	13686854	Nid1	Nid1	nidogen 1 [Source:MGI Symbol;Acc:MGI:97342]	74718	0.265079	1.4221	0.159843	0.914925	Increase	nonDE	-0.0893755	-0.451442	0.653194	0.961104	Decrease	nonDE	0.384397	1.90263	0.0615808	0.571009	Increase	nonDE	-0.208694	-0.973742	0.333844	0.767371	Decrease	nonDE	0.0413639	0.249409	0.803842	0.999557	Increase	nonDE	0.482005	2.49643	0.0151258	0.721732	Increase	nonDE	0.466203	2.39275	0.0196624	0.174911	Increase
730	ENSMUSG00000005410	8	75836197	75855067	Mcm5	Mcm5	minichromosome maintenance complex component 5 [Source:MGI Symbol;Acc:MGI:103197]	18870	0.049604	0.18303	0.855352	0.992636	Increase	nonDE	0.0567628	0.196296	0.845	0.985587	Increase	nonDE	0.50572	1.6223	0.109646	0.624966	Increase	nonDE	-0.399353	-1.21049	0.230533	0.720361	Decrease	nonDE	0.306144	1.20638	0.232103	0.999557	Increase	nonDE	-0.613699	-2.37001	0.0208068	0.746448	Decrease	nonDE	-0.149951	-0.582161	0.5625	0.780305	Decrease
731	ENSMUSG00000005413	8	75820249	75827217	Hmox1	Hmox1	heme oxygenase 1 [Source:MGI Symbol;Acc:MGI:96163]	6968	0.133252	0.370216	0.712441	0.985902	Increase	nonDE	-0.386062	-1.06577	0.290525	0.903648	Decrease	nonDE	-0.0832796	-0.228191	0.820224	0.955759	Decrease	nonDE	-0.16953	-0.457865	0.648597	0.900449	Decrease	nonDE	-0.0122203	-0.0363988	0.971077	0.999557	Decrease	nonDE	-0.251341	-0.722388	0.472683	0.975671	Decrease	nonDE	-0.15103	-0.414111	0.680175	0.853336	Decrease
732	ENSMUSG00000005417	11	59552131	59671686	Mprip	Mprip	myosin phosphatase Rho interacting protein [Source:MGI Symbol;Acc:MGI:1349438]	119555	0.139076	1.12328	0.265508	0.919545	Increase	nonDE	-0.1173	-0.910669	0.365881	0.916342	Decrease	nonDE	0.244888	1.87757	0.0649899	0.578481	Increase	nonDE	-0.223111	-1.63786	0.10635	0.670439	Decrease	nonDE	0.0226862	0.199751	0.842307	0.999557	Increase	nonDE	0.148759	1.2278	0.224009	0.921587	Increase	nonDE	0.37748	3.01895	0.00363768	0.0907917	Increase
733	ENSMUSG00000005442	7	24967129	24993584	Cic	Cic	capicua transcriptional repressor [Source:MGI Symbol;Acc:MGI:1918972]	26455	0.0410018	0.263354	0.793122	0.986922	Increase	nonDE	-0.0381665	-0.235808	0.814333	0.982814	Decrease	nonDE	0.159119	0.961938	0.339694	0.775104	Increase	nonDE	-0.156284	-0.905779	0.368444	0.788017	Decrease	nonDE	-0.0966105	-0.682429	0.497426	0.999557	Decrease	nonDE	0.0304337	0.204861	0.838329	0.995657	Increase	nonDE	0.147767	0.948278	0.346548	0.626421	Increase
734	ENSMUSG00000005447	7	24994474	24997411	Pafah1b3	Pafah1b3	platelet-activating factor acetylhydrolase, isoform 1b, subunit 3 [Source:MGI Symbol;Acc:MGI:108414]	2937	-0.0473313	-0.198576	0.843223	0.990559	Decrease	nonDE	-0.579075	-2.49081	0.0153452	0.857116	Decrease	nonDE	-0.344929	-1.43062	0.157394	0.668887	Decrease	nonDE	-0.281478	-1.18609	0.239964	0.725003	Decrease	nonDE	-0.453493	-2.14289	0.0359233	0.999557	Decrease	nonDE	-0.242888	-1.18789	0.239258	0.926783	Decrease	nonDE	-0.706209	-3.17086	0.00233169	0.0785017	Decrease
735	ENSMUSG00000005469	8	84699622	84723072	Prkaca	Prkaca	protein kinase, cAMP dependent, catalytic, alpha [Source:MGI Symbol;Acc:MGI:97592]	23450	0.00143193	0.00960931	0.992363	0.998352	Increase	nonDE	0.008304	0.0535193	0.957485	0.997115	Increase	nonDE	-0.0639301	-0.41435	0.680001	0.914462	Decrease	nonDE	0.073666	0.456161	0.649816	0.900829	Increase	nonDE	0.0995759	0.693217	0.490677	0.999557	Increase	nonDE	-0.0539641	-0.356932	0.722315	0.992561	Decrease	nonDE	0.00813676	0.0531393	0.957786	0.983963	Increase
736	ENSMUSG00000005470	8	84682136	84696826	Asf1b	Asf1b	anti-silencing function 1B histone chaperone [Source:MGI Symbol;Acc:MGI:1914179]	14690	0.131338	0.283022	0.778072	0.986803	Increase	nonDE	0.242362	0.495913	0.621651	0.958438	Increase	nonDE	0.376182	0.775292	0.441017	0.816842	Increase	nonDE	-0.00248124	-0.00483885	0.996154	0.9992	Decrease	nonDE	-1.06507	-2.32679	0.0231477	0.999557	Decrease	nonDE	0.451843	0.972039	0.334684	0.951231	Increase	nonDE	-0.805612	-1.65381	0.103054	0.355225	Decrease
737	ENSMUSG00000005481	8	84441806	84453521	Ddx39a	Ddx39a	DEAD box helicase 39a [Source:MGI Symbol;Acc:MGI:1915528]	11715	-0.442397	-1.5981	0.114937	0.914925	Decrease	nonDE	0.141773	0.504016	0.615978	0.957151	Increase	nonDE	-0.269456	-0.905128	0.368786	0.786761	Decrease	nonDE	-0.0311678	-0.102462	0.91871	0.978309	Decrease	nonDE	-0.252684	-0.989132	0.326316	0.999557	Decrease	nonDE	0.00565481	0.0212116	0.983143	0.999888	Increase	nonDE	-0.504818	-1.88818	0.0635274	0.285515	Decrease
738	ENSMUSG00000005483	8	84334822	84339282	Dnajb1	Dnajb1	DnaJ heat shock protein family (Hsp40) member B1 [Source:MGI Symbol;Acc:MGI:1931874]	4460	-0.141078	-0.763122	0.448189	0.955557	Decrease	nonDE	-0.0314099	-0.165369	0.869174	0.986868	Decrease	nonDE	0.0848875	0.424161	0.672868	0.911315	Increase	nonDE	-0.257376	-1.2471	0.216896	0.71552	Decrease	nonDE	0.228799	1.36301	0.177647	0.999557	Increase	nonDE	-0.188016	-1.05449	0.295615	0.943286	Decrease	nonDE	0.181399	1.00434	0.31899	0.601024	Increase
739	ENSMUSG00000005501	1	87872841	87936273	Usp40	Usp40	ubiquitin specific peptidase 40 [Source:MGI Symbol;Acc:MGI:2443184]	63432	-0.225398	-1.21786	0.227741	0.919218	Decrease	nonDE	0.163134	0.848365	0.399391	0.919162	Increase	nonDE	-0.138022	-0.703181	0.484488	0.837952	Decrease	nonDE	0.0757575	0.370156	0.712486	0.921042	Increase	nonDE	-0.258314	-1.45434	0.150728	0.999557	Decrease	nonDE	-0.0591595	-0.325698	0.745714	0.992561	Decrease	nonDE	-0.33052	-1.74288	0.0861483	0.327116	Decrease
740	ENSMUSG00000005503	6	52290483	52295363	Evx1	Evx1	even-skipped homeobox 1 [Source:MGI Symbol;Acc:MGI:95461]	4880	-0.0900768	-0.173398	0.862941	0.992818	Decrease	nonDE	-0.206657	-0.388393	0.699145	0.966626	Decrease	nonDE	-0.766883	-1.45484	0.151093	0.663695	Decrease	nonDE	0.470149	0.86432	0.390965	0.800613	Increase	nonDE	0.279986	0.537771	0.592789	0.999557	Increase	nonDE	-0.42522	-0.792748	0.431149	0.971017	Decrease	nonDE	0.359256	0.666737	0.507579	0.746024	Increase
741	ENSMUSG00000005505	2	90735084	90741970	Kbtbd4	Kbtbd4	kelch repeat and BTB (POZ) domain containing 4 [Source:MGI Symbol;Acc:MGI:1914386]	6886	0.179259	1.02007	0.31153	0.926376	Increase	nonDE	-0.073598	-0.396775	0.692851	0.966626	Decrease	nonDE	0.0752111	0.41071	0.682654	0.915031	Increase	nonDE	0.0304494	0.15697	0.875761	0.966425	Increase	nonDE	-0.0295293	-0.193308	0.847329	0.999557	Decrease	nonDE	0.22142	1.32376	0.190282	0.902424	Increase	nonDE	0.117299	0.68197	0.497714	0.738894	Increase
742	ENSMUSG00000005506	2	90770727	90849842	Celf1	Celf1	CUGBP, Elav-like family member 1 [Source:MGI Symbol;Acc:MGI:1342295]	79115	0.186874	2.05697	0.0437615	0.914925	Increase	nonDE	0.0394737	0.411075	0.682388	0.964743	Increase	nonDE	0.22854	2.40064	0.0192787	0.489965	Increase	nonDE	-0.00219187	-0.0217192	0.982739	0.997825	Decrease	nonDE	0.185256	2.21043	0.0306504	0.999557	Increase	nonDE	0.259978	2.85148	0.00584869	0.721732	Increase	nonDE	0.333101	3.66788	0.000498997	0.0428474	Increase
743	ENSMUSG00000005510	2	90724978	90735171	Ndufs3	Ndufs3	NADH:ubiquinone oxidoreductase core subunit S3 [Source:MGI Symbol;Acc:MGI:1915599]	10193	-0.0934346	-0.507254	0.613717	0.974472	Decrease	nonDE	0.11053	0.574667	0.567528	0.948277	Increase	nonDE	-0.229132	-1.22051	0.226741	0.706488	Decrease	nonDE	0.246227	1.24807	0.216542	0.715453	Increase	nonDE	-0.178568	-1.09294	0.278508	0.999557	Decrease	nonDE	0.0717482	0.417252	0.677888	0.990618	Increase	nonDE	0.0252519	0.137801	0.890829	0.955176	Increase
744	ENSMUSG00000005514	5	135698887	135764180	Por	Por	cytochrome p450 oxidoreductase [Source:MGI Symbol;Acc:MGI:97744]	65293	0.222872	1.61444	0.111343	0.914925	Increase	nonDE	-0.146982	-1.01722	0.312873	0.907555	Decrease	nonDE	0.263387	1.80789	0.0753141	0.587908	Increase	nonDE	-0.187497	-1.22571	0.22479	0.718916	Decrease	nonDE	0.0234499	0.183124	0.855278	0.999557	Increase	nonDE	-0.0547247	-0.407758	0.68481	0.991008	Decrease	nonDE	0.141623	1.01171	0.315481	0.597661	Increase
745	ENSMUSG00000005533	7	67602575	67883416	Igf1r	Igf1r	insulin-like growth factor I receptor [Source:MGI Symbol;Acc:MGI:96433]	280841	0.167038	1.30913	0.195161	0.914925	Increase	nonDE	0.0919963	0.680485	0.498647	0.934499	Increase	nonDE	0.110126	0.830223	0.409493	0.803412	Increase	nonDE	0.148909	1.05573	0.295052	0.752803	Increase	nonDE	0.332229	2.81062	0.0065505	0.999557	Increase	nonDE	0.147687	1.14689	0.255689	0.927393	Increase	nonDE	0.341226	2.68844	0.009137	0.128889	Increase
746	ENSMUSG00000005534	8	3172061	3329617	Insr	Insr	insulin receptor [Source:MGI Symbol;Acc:MGI:96575]	157556	0.436676	2.14491	0.0357547	0.914925	Increase	nonDE	-0.355922	-1.67517	0.0987709	0.857116	Decrease	nonDE	0.33177	1.55801	0.124153	0.640143	Increase	nonDE	-0.251017	-1.12493	0.264813	0.740408	Decrease	nonDE	0.271861	1.57015	0.121303	0.999557	Increase	nonDE	0.109545	0.564046	0.574691	0.983222	Increase	nonDE	0.300934	1.5718	0.12092	0.382412	Increase
747	ENSMUSG00000005566	7	12733041	12764962	Trim28	Trim28	tripartite motif-containing 28 [Source:MGI Symbol;Acc:MGI:109274]	31921	0.18118	1.33037	0.188108	0.914925	Increase	nonDE	-0.153092	-1.07802	0.285064	0.903648	Decrease	nonDE	0.162423	1.14273	0.257401	0.728301	Increase	nonDE	-0.134334	-0.902348	0.370249	0.789079	Decrease	nonDE	0.0160587	0.129135	0.897655	0.999557	Increase	nonDE	-0.107371	-0.82451	0.412706	0.965421	Decrease	nonDE	0.160777	1.17319	0.245058	0.529276	Increase
748	ENSMUSG00000005575	7	12769047	12772202	Ube2m	Ube2m	ubiquitin-conjugating enzyme E2M [Source:MGI Symbol;Acc:MGI:108278]	3155	0.0945081	0.502859	0.616787	0.974913	Increase	nonDE	-0.22083	-1.14129	0.257994	0.896482	Decrease	nonDE	-0.0269366	-0.138506	0.890275	0.973006	Decrease	nonDE	-0.099385	-0.493395	0.623419	0.890401	Decrease	nonDE	-0.150189	-0.852511	0.397104	0.999557	Decrease	nonDE	-0.305502	-1.73221	0.0880451	0.838748	Decrease	nonDE	-0.137522	-0.717627	0.475593	0.722846	Decrease
749	ENSMUSG00000005580	16	4105393	4238362	Adcy9	Adcy9	adenylate cyclase 9 [Source:MGI Symbol;Acc:MGI:108450]	132969	0.137897	0.909584	0.366448	0.943914	Increase	nonDE	0.124998	0.766461	0.446215	0.929096	Increase	nonDE	0.1757	1.09873	0.275995	0.739037	Increase	nonDE	0.0871957	0.506617	0.614161	0.887205	Increase	nonDE	-0.0927947	-0.67992	0.499002	0.999557	Decrease	nonDE	0.414734	2.75559	0.00761843	0.721732	Increase	nonDE	0.367076	2.33886	0.0224716	0.183448	Increase
750	ENSMUSG00000005583	13	83652153	83815199	Mef2c	Mef2c	myocyte enhancer factor 2C [Source:MGI Symbol;Acc:MGI:99458]	163046	0.0104478	0.0803318	0.936224	0.995268	Increase	nonDE	-0.00497284	-0.0366951	0.970842	0.997115	Decrease	nonDE	0.216885	1.56512	0.122477	0.63918	Increase	nonDE	-0.21141	-1.45993	0.149191	0.687301	Decrease	nonDE	0.052763	0.436598	0.663869	0.999557	Increase	nonDE	-0.152654	-1.2105	0.23053	0.925431	Decrease	nonDE	0.228907	1.74268	0.0861843	0.327116	Increase
751	ENSMUSG00000005609	7	110628158	110655584	Ctr9	Ctr9	CTR9 homolog, Paf1/RNA polymerase II complex component [Source:MGI Symbol;Acc:MGI:109345]	27426	-0.0751247	-0.538461	0.592123	0.973503	Decrease	nonDE	0.00199692	0.0138233	0.989014	0.998292	Increase	nonDE	0.129231	0.864157	0.390723	0.794969	Increase	nonDE	-0.202358	-1.30265	0.197353	0.706665	Decrease	nonDE	0.0503077	0.387374	0.699762	0.999557	Increase	nonDE	-0.0685372	-0.502367	0.617131	0.986935	Decrease	nonDE	0.342196	2.38425	0.0200833	0.176349	Increase
752	ENSMUSG00000005610	7	110666957	110682237	Eif4g2	Eif4g2	eukaryotic translation initiation factor 4, gamma 2 [Source:MGI Symbol;Acc:MGI:109207]	15280	0.0251256	0.313096	0.755224	0.986466	Increase	nonDE	0.0669263	0.796502	0.42868	0.925602	Increase	nonDE	-0.108308	-1.31039	0.194737	0.687013	Decrease	nonDE	0.20036	2.30291	0.0245388	0.659766	Increase	nonDE	0.0908698	1.2053	0.232517	0.999557	Increase	nonDE	-0.0409796	-0.515891	0.607705	0.98511	Decrease	nonDE	0.0714924	0.887146	0.378316	0.653484	Increase
753	ENSMUSG00000005611	7	110467473	110581668	Irag1	Irag1	inositol 1,4,5-triphosphate receptor associated 1 [Source:MGI Symbol;Acc:MGI:1338023]	114195	0.74819	1.28587	0.203112	0.914925	Increase	nonDE	-0.878458	-1.4699	0.146478	0.867359	Decrease	nonDE	0.376732	0.633458	0.528688	0.854547	Increase	nonDE	-0.507	-0.824296	0.412827	0.805831	Decrease	nonDE	0.0828863	0.170788	0.864929	0.999557	Increase	nonDE	0.585857	1.0584	0.293845	0.943286	Increase	nonDE	1.45347	2.52941	0.0138945	0.151127	Increase
754	ENSMUSG00000005615	16	32249739	32293888	Pcyt1a	Pcyt1a	phosphate cytidylyltransferase 1, choline, alpha isoform [Source:MGI Symbol;Acc:MGI:88557]	44149	0.0798798	0.696477	0.488647	0.959854	Increase	nonDE	-0.112038	-0.941557	0.349953	0.913265	Decrease	nonDE	0.203853	1.66486	0.10082	0.618012	Increase	nonDE	-0.236011	-1.85184	0.0686543	0.659766	Decrease	nonDE	-0.0914519	-0.886273	0.378782	0.999557	Decrease	nonDE	0.112659	1.02956	0.307087	0.947522	Increase	nonDE	0.0872696	0.770082	0.444079	0.700948	Increase
755	ENSMUSG00000005621	7	80643429	80694912	Zfp592	Zfp592	zinc finger protein 592 [Source:MGI Symbol;Acc:MGI:2443541]	51483	0.408969	2.24532	0.028203	0.914925	Increase	nonDE	-0.338086	-1.76976	0.081521	0.857116	Decrease	nonDE	0.227959	1.22265	0.225939	0.705499	Increase	nonDE	-0.157077	-0.798703	0.427411	0.813262	Decrease	nonDE	-0.0383383	-0.230683	0.818296	0.999557	Decrease	nonDE	0.126881	0.706525	0.482421	0.975723	Increase	nonDE	0.102308	0.550821	0.583671	0.795355	Increase
756	ENSMUSG00000005625	3	94940005	94949925	Psmd4	Psmd4	proteasome (prosome, macropain) 26S subunit, non-ATPase, 4 [Source:MGI Symbol;Acc:MGI:1201670]	9920	-0.10738	-0.920692	0.360662	0.943914	Decrease	nonDE	-0.153808	-1.29274	0.20074	0.883214	Decrease	nonDE	-0.0383694	-0.314224	0.754371	0.937855	Decrease	nonDE	-0.222819	-1.77773	0.0801898	0.661738	Decrease	nonDE	-0.156048	-1.41785	0.161077	0.999557	Decrease	nonDE	-0.0916683	-0.807235	0.422516	0.968113	Decrease	nonDE	-0.0770335	-0.65261	0.516341	0.751971	Decrease
757	ENSMUSG00000005656	12	54793134	54842488	Snx6	Snx6	sorting nexin 6 [Source:MGI Symbol;Acc:MGI:1919433]	49354	-0.0207977	-0.203537	0.83936	0.990197	Decrease	nonDE	-0.0978828	-0.928641	0.356558	0.913747	Decrease	nonDE	-0.0308767	-0.289712	0.772971	0.944646	Decrease	nonDE	-0.0878038	-0.794358	0.429918	0.81528	Decrease	nonDE	-0.0734918	-0.765256	0.446927	0.999557	Decrease	nonDE	-0.174984	-1.76823	0.0817792	0.837201	Decrease	nonDE	0.0288776	0.277993	0.781912	0.907356	Increase
758	ENSMUSG00000005667	6	83282673	83302890	Mthfd2	Mthfd2	methylenetetrahydrofolate dehydrogenase (NAD+ dependent), methenyltetrahydrofolate cyclohydrolase [Source:MGI Symbol;Acc:MGI:1338850]	20217	-0.167725	-1.03034	0.306723	0.924765	Decrease	nonDE	-0.0472613	-0.284944	0.776605	0.977672	Decrease	nonDE	-0.521869	-3.19696	0.00215734	0.430429	Decrease	nonDE	0.306882	1.8301	0.0718829	0.659766	Increase	nonDE	0.183471	1.27059	0.208467	0.999557	Increase	nonDE	-0.117024	-0.760491	0.449749	0.975446	Decrease	nonDE	0.199968	1.25618	0.21361	0.495649	Increase
759	ENSMUSG00000005672	5	75735576	75817382	Kit	Kit	KIT proto-oncogene receptor tyrosine kinase [Source:MGI Symbol;Acc:MGI:96677]	81806	-0.0301172	-0.216709	0.829123	0.98991	Decrease	nonDE	0.275903	1.86997	0.0660551	0.857116	Increase	nonDE	-0.0193394	-0.133221	0.894436	0.974806	Decrease	nonDE	0.265125	1.71528	0.0911223	0.662143	Increase	nonDE	0.0710875	0.543396	0.588742	0.999557	Increase	nonDE	0.306622	2.16195	0.0343602	0.764654	Increase	nonDE	0.236192	1.65988	0.101823	0.353813	Increase
760	ENSMUSG00000005674	1	171043580	171050083	Tomm40l	Tomm40l	translocase of outer mitochondrial membrane 40-like [Source:MGI Symbol;Acc:MGI:3589112]	6503	0.103661	0.563925	0.574772	0.972241	Increase	nonDE	-0.0304669	-0.157369	0.875448	0.986868	Decrease	nonDE	-0.056085	-0.295936	0.768235	0.942877	Decrease	nonDE	0.129279	0.644565	0.521509	0.853663	Increase	nonDE	-0.227501	-1.27738	0.206074	0.999557	Decrease	nonDE	-0.0849459	-0.467282	0.641883	0.98961	Decrease	nonDE	-0.436383	-2.30856	0.0242032	0.188765	Decrease
761	ENSMUSG00000005681	1	171052623	171053948	Apoa2	Apoa2	apolipoprotein A-II [Source:MGI Symbol;Acc:MGI:88050]	1325	0.138706	0.263256	0.793197	0.986922	Increase	nonDE	0.0193538	0.035342	0.971917	0.997115	Increase	nonDE	0.236983	0.433568	0.666057	0.907947	Increase	nonDE	-0.0789224	-0.138206	0.890511	0.969993	Decrease	nonDE	0.273056	0.529663	0.598175	0.999557	Increase	nonDE	0.23686	0.435067	0.664975	0.990618	Increase	nonDE	0.263434	0.489776	0.625964	0.82049	Increase
762	ENSMUSG00000005682	10	128139204	128157227	Pan2	Pan2	PAN2 poly(A) specific ribonuclease subunit [Source:MGI Symbol;Acc:MGI:1918984]	18023	-0.418051	-1.08727	0.280989	0.921046	Decrease	nonDE	0.884108	2.00369	0.0493322	0.857116	Increase	nonDE	-0.643188	-1.64909	0.10402	0.618244	Decrease	nonDE	1.10925	2.46897	0.016225	0.659766	Increase	nonDE	0.374191	0.858172	0.393994	0.999557	Increase	nonDE	-0.159603	-0.335375	0.738437	0.992561	Decrease	nonDE	-0.836409	-2.07416	0.0420848	0.239474	Decrease
763	ENSMUSG00000005683	10	128173603	128198348	Cs	Cs	citrate synthase [Source:MGI Symbol;Acc:MGI:88529]	24745	-0.0188509	-0.076739	0.93907	0.995429	Decrease	nonDE	0.0625988	0.24388	0.808102	0.982247	Increase	nonDE	-0.442048	-1.81837	0.0736782	0.583806	Decrease	nonDE	0.485795	1.89528	0.0625655	0.659766	Increase	nonDE	0.212127	0.916806	0.36268	0.999557	Increase	nonDE	-0.0320437	-0.129507	0.897362	0.997348	Decrease	nonDE	-0.123707	-0.50855	0.612813	0.812145	Decrease
764	ENSMUSG00000005686	7	110367413	110411612	Ampd3	Ampd3	adenosine monophosphate deaminase 3 [Source:MGI Symbol;Acc:MGI:1096344]	44199	-0.325104	-1.18613	0.239948	0.919545	Decrease	nonDE	-0.0902136	-0.335328	0.738472	0.973429	Decrease	nonDE	-0.710485	-2.62533	0.0108111	0.455927	Decrease	nonDE	0.295168	1.10203	0.27457	0.747227	Increase	nonDE	-0.0752121	-0.308434	0.758752	0.999557	Decrease	nonDE	0.176635	0.664684	0.508636	0.979776	Increase	nonDE	0.136818	0.488807	0.626646	0.820982	Increase
765	ENSMUSG00000005687	3	103078971	103086482	Bcas2	Bcas2	BCAS2 pre-mRNA processing factor [Source:MGI Symbol;Acc:MGI:1915433]	7511	0.274421	1.5735	0.120524	0.914925	Increase	nonDE	-0.132265	-0.719288	0.474577	0.930733	Decrease	nonDE	-0.144747	-0.835449	0.406567	0.8015	Decrease	nonDE	0.286904	1.55699	0.124394	0.674283	Increase	nonDE	-0.0684788	-0.427378	0.670536	0.999557	Decrease	nonDE	0.0981972	0.578788	0.56476	0.983222	Increase	nonDE	-0.103093	-0.593915	0.554658	0.775204	Decrease
766	ENSMUSG00000005698	8	106363200	106409554	Ctcf	Ctcf	CCCTC-binding factor [Source:MGI Symbol;Acc:MGI:109447]	46354	0.0667441	0.418596	0.67691	0.978613	Increase	nonDE	-0.0927749	-0.559829	0.577547	0.951118	Decrease	nonDE	0.294555	1.73169	0.0881371	0.603379	Increase	nonDE	-0.320586	-1.80781	0.0753273	0.659766	Decrease	nonDE	0.00409974	0.0280794	0.977686	0.999557	Increase	nonDE	0.0648752	0.419542	0.676223	0.990618	Increase	nonDE	0.204961	1.29415	0.200254	0.482501	Increase
767	ENSMUSG00000005699	8	106427780	106430128	Pard6a	Pard6a	par-6 family cell polarity regulator alpha [Source:MGI Symbol;Acc:MGI:1927223]	2348	-0.0784883	-0.535433	0.594203	0.973642	Decrease	nonDE	0.0570012	0.372408	0.710817	0.968947	Increase	nonDE	-0.0155111	-0.100463	0.92029	0.980908	Decrease	nonDE	-0.0059761	-0.0369369	0.97065	0.994927	Decrease	nonDE	-0.0589632	-0.425199	0.672115	0.999557	Decrease	nonDE	-0.0994771	-0.689387	0.493067	0.977398	Decrease	nonDE	-0.177415	-1.20524	0.23254	0.516421	Decrease
768	ENSMUSG00000005716	15	78075314	78090600	Pvalb	Pvalb	parvalbumin [Source:MGI Symbol;Acc:MGI:97821]	15286	-0.0172547	-0.088706	0.929592	0.994788	Decrease	nonDE	0.114687	0.560295	0.57723	0.951118	Increase	nonDE	0.203359	0.983504	0.329056	0.769176	Increase	nonDE	-0.105927	-0.485874	0.628713	0.892401	Decrease	nonDE	-0.135559	-0.747049	0.457764	0.999557	Decrease	nonDE	-0.179356	-0.962866	0.339232	0.951231	Decrease	nonDE	-0.331968	-1.74756	0.0853281	0.325439	Decrease
769	ENSMUSG00000005718	16	4362525	4377718	Tfap4	Tfap4	transcription factor AP4 [Source:MGI Symbol;Acc:MGI:103239]	15193	-0.220068	-0.596524	0.552926	0.96722	Decrease	nonDE	0.0998093	0.257745	0.797429	0.979931	Increase	nonDE	0.263394	0.635091	0.527629	0.854511	Increase	nonDE	-0.383653	-0.883533	0.380249	0.795561	Decrease	nonDE	0.119615	0.334353	0.739204	0.999557	Increase	nonDE	-0.528844	-1.46134	0.148804	0.889358	Decrease	nonDE	-0.688857	-1.99142	0.0506988	0.258604	Decrease
770	ENSMUSG00000005732	16	18057648	18066596	Ranbp1	Ranbp1	RAN binding protein 1 [Source:MGI Symbol;Acc:MGI:96269]	8948	0.143506	0.831269	0.408907	0.950011	Increase	nonDE	-0.236945	-1.32767	0.188994	0.882339	Decrease	nonDE	0.0910179	0.501198	0.617948	0.888567	Increase	nonDE	-0.184457	-0.97803	0.331735	0.766854	Decrease	nonDE	-0.0571597	-0.369516	0.71296	0.999557	Decrease	nonDE	-0.247906	-1.56695	0.122047	0.866124	Decrease	nonDE	0.000606626	0.00358389	0.997152	0.999287	Increase
771	ENSMUSG00000005774	3	94861386	94868872	Rfx5	Rfx5	regulatory factor X, 5 (influences HLA class II expression) [Source:MGI Symbol;Acc:MGI:1858421]	7486	0.0203688	0.125195	0.900761	0.994099	Increase	nonDE	0.238136	1.35957	0.178727	0.876035	Increase	nonDE	0.0541153	0.314015	0.754529	0.937913	Increase	nonDE	0.204389	1.10175	0.274689	0.747235	Increase	nonDE	0.141589	0.944218	0.348603	0.999557	Increase	nonDE	0.171221	1.03493	0.304589	0.947267	Increase	nonDE	0.0957437	0.584062	0.561228	0.779366	Increase
772	ENSMUSG00000005779	3	94791404	94794272	Psmb4	Psmb4	proteasome (prosome, macropain) subunit, beta type 4 [Source:MGI Symbol;Acc:MGI:1098257]	2868	-0.0859768	-0.739864	0.462083	0.958877	Decrease	nonDE	0.126144	1.03777	0.303276	0.907555	Increase	nonDE	-0.0370046	-0.303652	0.762376	0.940673	Decrease	nonDE	0.077172	0.60311	0.548563	0.862242	Increase	nonDE	-0.0593588	-0.524968	0.601416	0.999557	Decrease	nonDE	-0.138001	-1.18074	0.242068	0.926783	Decrease	nonDE	-0.266745	-2.24622	0.0281419	0.20168	Decrease
773	ENSMUSG00000005800	9	7558457	7568486	Mmp8	Mmp8	matrix metallopeptidase 8 [Source:MGI Symbol;Acc:MGI:1202395]	10029	-1.10041	-1.74005	0.0866473	0.914925	Decrease	nonDE	1.33471	1.92499	0.0586694	0.857116	Increase	nonDE	-0.617296	-0.89091	0.376308	0.789621	Decrease	nonDE	0.851597	1.12911	0.263059	0.738956	Increase	nonDE	-0.556294	-0.718577	0.475012	0.999557	Decrease	nonDE	0.302282	0.378978	0.705956	0.992561	Increase	nonDE	-2.23838	-3.25661	0.00180369	0.0709797	Decrease
774	ENSMUSG00000005802	2	122523153	122544583	Slc30a4	Slc30a4	solute carrier family 30 (zinc transporter), member 4 [Source:MGI Symbol;Acc:MGI:1345282]	21430	-0.151675	-1.04361	0.300586	0.924765	Decrease	nonDE	0.290112	1.88065	0.0645619	0.857116	Increase	nonDE	-0.116509	-0.765643	0.446698	0.819954	Decrease	nonDE	0.254946	1.57427	0.120346	0.674283	Increase	nonDE	-0.144194	-1.03583	0.304171	0.999557	Decrease	nonDE	-0.0617601	-0.427403	0.670518	0.990618	Decrease	nonDE	-0.253706	-1.69809	0.0943394	0.342236	Decrease
775	ENSMUSG00000005803	2	122607157	122651489	Sqor	Sqor	sulfide quinone oxidoreductase [Source:MGI Symbol;Acc:MGI:1929899]	44332	-0.197289	-0.421843	0.674551	0.97841	Decrease	nonDE	0.387669	0.770541	0.443809	0.929096	Increase	nonDE	-0.316084	-0.654435	0.515172	0.852578	Decrease	nonDE	0.506464	0.971497	0.334951	0.768367	Increase	nonDE	0.0160134	0.0328093	0.973929	0.999557	Increase	nonDE	-0.0912749	-0.178156	0.859162	0.995883	Decrease	nonDE	-0.21602	-0.421449	0.674837	0.850143	Decrease
[truncated: 17,743 more rows]
[truncated: 91 more columns]

## Sheet: Frontal Cortex DEGs
	ensembl_gene_id	chromosome_name	start_position	end_position	mgi_symbol	external_gene_name	description	genelength	logFC_F_PolyIC_salvsTreg	t_F_PolyIC_salvsTreg	P.Value_F_PolyIC_salvsTreg	adj.P.Val_F_PolyIC_salvsTreg	direction_F_PolyIC_salvsTreg	significance_F_PolyIC_salvsTreg	logFC_F_PolyICvsSaline_sal	t_F_PolyICvsSaline_sal	P.Value_F_PolyICvsSaline_sal	adj.P.Val_F_PolyICvsSaline_sal	direction_F_PolyICvsSaline_sal	significance_F_PolyICvsSaline_sal	logFC_F_PolyICvsSaline_Treg	t_F_PolyICvsSaline_Treg	P.Value_F_PolyICvsSaline_Treg	adj.P.Val_F_PolyICvsSaline_Treg	direction_F_PolyICvsSaline_Treg	significance_F_PolyICvsSaline_Treg	logFC_F_Saline_salvsTreg	t_F_Saline_salvsTreg	P.Value_F_Saline_salvsTreg	adj.P.Val_F_Saline_salvsTreg	direction_F_Saline_salvsTreg	significance_F_Saline_salvsTreg	logFC_M_PolyIC_salvsTreg	t_M_PolyIC_salvsTreg	P.Value_M_PolyIC_salvsTreg	adj.P.Val_M_PolyIC_salvsTreg	direction_M_PolyIC_salvsTreg	significance_M_PolyIC_salvsTreg	logFC_M_PolyICvsSaline_sal	t_M_PolyICvsSaline_sal	P.Value_M_PolyICvsSaline_sal	adj.P.Val_M_PolyICvsSaline_sal	direction_M_PolyICvsSaline_sal	significance_M_PolyICvsSaline_sal	logFC_M_PolyICvsSaline_Treg	t_M_PolyICvsSaline_Treg	P.Value_M_PolyICvsSaline_Treg	adj.P.Val_M_PolyICvsSaline_Treg	direction_M_PolyICvsSaline_Treg
[truncated: 16,485 more rows]
[truncated: 89 more columns]

[truncated: 7 more sheets: Hippocampus DEGs, GO CB DamPolyICvSal_MalePup, CB DEGs MGEnrichments, GO FC DamPolyICvSal_MalePupTreg, FC DEGs MGEnrichments, GO HC DamSal_MalePupSalvsTreg, HC DEGs MGEnrichments]
